# Supplementary material for: Comprehensive transcriptomic analysis indicates brain regional specific alterations in type 2 diabetes
Source: publisher site journal article supplement (doi:10.18632/aging.102196), 2019-08-26
Supplement: Supplementary file [file aging-v11i16-102196-supplementary-material-SD9.pdf]

**Supplementary Table 8. SNP-based enrichment analysis for caudate modules and sub-modules.**

| Module      | T2D SNPs |          |          |          | Height SNPs |            |          |          |
|-------------|----------|----------|----------|----------|-------------|------------|----------|----------|
|             | Size     | ES       | P-value  | FDR      | Size        | ES         | P-value  | FDR      |
| turquoise   | 1576     | 0.415712 | 0        | 0        | 1576        | 0.4111951  | 0.0497   | 0.13916  |
| red         | 260      | 0.425652 | 0.00815  | 0.03325  | 260         | 0.42124715 | 0.2414   | 0.289756 |
| magenta     | 156      | 0.444919 | 0.0091   | 0.03325  | 156         | 0.45935112 | 0.12445  | 0.2489   |
| green       | 373      | 0.435294 | 0.0095   | 0.03325  | 374         | 0.4505773  | 0.04135  | 0.13916  |
| tan         | 61       | 0.504785 | 0.01205  | 0.03374  | 61          | 0.46593708 | 0.248362 | 0.289756 |
| yellow      | 481      | 0.368788 | 0.03835  | 0.089483 | 481         | 0.49281818 | 3.00E-04 | 0.0042   |
| purple      | 118      | 0.400124 | 0.09525  | 0.1905   | 118         | 0.38965136 | 0.56555  | 0.56555  |
| salmon      | 39       | 0.439662 | 0.163975 | 0.286956 | 39          | 0.56709814 | 0.069181 | 0.161423 |
| greenyellow | 95       | 0.384014 | 0.20735  | 0.306483 | 95          | 0.57951885 | 0.00415  | 0.019367 |
| black       | 228      | 0.351542 | 0.24705  | 0.306483 | 228         | 0.42270425 | 0.24785  | 0.289756 |
| blue        | 468      | 0.337558 | 0.25135  | 0.306483 | 468         | 0.40408793 | 0.2989   | 0.321892 |
| brown       | 503      | 0.335818 | 0.2627   | 0.306483 | 503         | 0.47241223 | 0.00295  | 0.019367 |
| pink        | 215      | 0.345973 | 0.30135  | 0.324531 | 215         | 0.42818555 | 0.22605  | 0.289756 |
| cyan        | 37       | 0.315055 | 0.746361 | 0.746361 | 37          | 0.49608    | 0.228706 | 0.289756 |

  

| Sub-module | T2D SNPs |          |         |         | Height SNPs |            |         |         |
|------------|----------|----------|---------|---------|-------------|------------|---------|---------|
|            | Size     | ES       | P-value | FDR     | Size        | ES         | P-value | FDR     |
| D2-MSN     | 71       | 0.485125 | 0.0144  | 0.0432  | 71          | 0.4155968  | 0.45245 | 0.49075 |
| D1-MSN     | 75       | 0.453621 | 0.0355  | 0.04715 | 75          | 0.47593623 | 0.1792  | 0.49075 |
| striatum   | 83       | 0.4398   | 0.04715 | 0.04715 | 83          | 0.40625075 | 0.49075 | 0.49075 |

**Supplementary Table 9. Modules enriched in DAGs.**

| Up-regulated DAGs |           |          |          |       | Down-regulated DAGs |           |          |          |       |
|-------------------|-----------|----------|----------|-------|---------------------|-----------|----------|----------|-------|
| Module            | GeneRatio | P-value  | FDR      | Count | Module              | GeneRatio | P-value  | FDR      | Count |
| blue              | 460/1186  | 0        | 0        | 460   | turquoise           | 887/1753  | 0        | 0        | 887   |
| green             | 57/1186   | 5.81E-12 | 1.60E-11 | 57    | black               | 54/1753   | 6.01E-13 | 1.35E-12 | 54    |
| purple            | 26/1186   | 5.44E-09 | 1.20E-08 | 26    |                     |           |          |          |       |

Note: GeneRatio refers to Number of intersection genes / Size of Up- or Down-regulated DAG set.

Please browse Full Text version to see the data of Supplementary Table 10.

**Supplementary Table 10. Functional annotations of caudate modules (sub-modules).**
