# Supplementary material for: Comprehensive transcriptomic analysis indicates brain regional specific alterations in type 2 diabetes
Source: Aging (Albany NY). 2019 Aug 26;11(16):6398–421. doi: 10.18632/aging.102196 (PMC6738403; doi:10.18632/aging.102196)
Supplement: Supplementary Table 2 [file aging-11-102196-s007.xlsx]

## Sheet: Supplementary Table 2
Supplementary Table 2. Details of DAGs in each brain region
Region	Gene	Ensembl ID	Biotype	Chromosome	Log2FoldChange	P-value	FDR
Amygdala	NPY	ENSG00000122585.3	protein_coding	7	-0.904	8.9e-06	0.0408
Amygdala	BOP1	ENSG00000170727.7	protein_coding	8	-0.586	9.36e-06	0.0408
Amygdala	P2RY6	ENSG00000171631.10	protein_coding	11	-1.45	6.84e-06	0.0408
Amygdala	COTL1	ENSG00000103187.6	protein_coding	16	-0.413	2.21e-08	0.0005
Amygdala	BAX	ENSG00000087088.15	protein_coding	19	-0.413	5.42e-06	0.0408
Amygdala	CITED1	ENSG00000125931.6	protein_coding	X	-1.09	1.08e-05	0.0408
Anterior_cingulate_cortex	C16orf95	ENSG00000260456.2	protein_coding	16	-0.451	3.98e-09	9.18e-05
Caudate	NOC2L	ENSG00000188976.6	protein_coding	1	-0.179	0.000639	0.0123
Caudate	TTLL10	ENSG00000162571.9	protein_coding	1	0.956	0.00025	0.00736
Caudate	GNB1	ENSG00000078369.13	protein_coding	1	-0.216	5.26e-06	0.000936
Caudate	GABRD	ENSG00000187730.6	protein_coding	1	-0.479	0.00407	0.0383
Caudate	PRKCZ	ENSG00000067606.11	protein_coding	1	-0.365	0.00447	0.0404
Caudate	MORN1	ENSG00000116151.9	protein_coding	1	0.396	0.000125	0.00499
Caudate	RP4-713A8.1	ENSG00000272161.1	sense_intronic	1	0.749	1.65e-05	0.0016
Caudate	AL589739.1	ENSG00000269753.1	protein_coding	1	0.489	0.00265	0.029
Caudate	HES5	ENSG00000197921.5	protein_coding	1	0.762	0.000323	0.00835
Caudate	MMEL1	ENSG00000142606.11	protein_coding	1	0.644	0.000643	0.0123
Caudate	TTC34	ENSG00000215912.7	protein_coding	1	0.798	0.000323	0.00835
Caudate	RP11-46F15.2	ENSG00000238260.1	antisense	1	0.365	0.000609	0.0119
Caudate	TPRG1L	ENSG00000158109.10	protein_coding	1	-0.251	0.000489	0.0105
Caudate	TP73	ENSG00000078900.10	protein_coding	1	0.809	0.000114	0.00477
Caudate	LRRC47	ENSG00000130764.5	protein_coding	1	-0.176	4.27e-06	0.00084
Caudate	AJAP1	ENSG00000196581.6	protein_coding	1	-0.281	0.00585	0.0476
Caudate	ICMT	ENSG00000116237.11	protein_coding	1	-0.203	0.00105	0.0167
Caudate	ACOT7	ENSG00000097021.15	protein_coding	1	-0.445	0.000285	0.00782
Caudate	TAS1R1	ENSG00000173662.15	protein_coding	1	0.387	0.00575	0.0471
Caudate	DNAJC11	ENSG00000007923.11	protein_coding	1	-0.165	0.00167	0.0219
Caudate	CAMTA1	ENSG00000171735.14	protein_coding	1	-0.257	0.000162	0.00577
Caudate	LRRC38	ENSG00000162494.5	protein_coding	1	-0.458	0.000801	0.0142
Caudate	KAZN	ENSG00000189337.11	protein_coding	1	-0.261	1.15e-05	0.00139
Caudate	FHAD1	ENSG00000142621.15	protein_coding	1	1.45	4.03e-07	0.00036
Caudate	RP3-467K16.2	ENSG00000233485.1	antisense	1	0.971	0.00146	0.0202
Caudate	RP3-467K16.4	ENSG00000228140.1	lincRNA	1	0.811	0.00202	0.0247
Caudate	ANO7P1	ENSG00000237276.4	pseudogene	1	0.343	0.00101	0.0163
Caudate	CROCC	ENSG00000058453.12	protein_coding	1	0.376	0.000506	0.0108
Caudate	SDHB	ENSG00000117118.5	protein_coding	1	-0.149	0.00011	0.00472
Caudate	PAX7	ENSG00000009709.7	protein_coding	1	-0.846	3.15e-05	0.00229
Caudate	HTR6	ENSG00000158748.3	protein_coding	1	-0.556	0.00527	0.0449
Caudate	UBXN10	ENSG00000162543.5	protein_coding	1	0.451	0.00402	0.0379
Caudate	VWA5B1	ENSG00000158816.11	protein_coding	1	1.92	2.59e-07	0.000335
Caudate	CAMK2N1	ENSG00000162545.5	protein_coding	1	-0.335	0.00113	0.0175
Caudate	DDOST	ENSG00000244038.5	protein_coding	1	-0.137	0.000254	0.0074
Caudate	LDLRAD2	ENSG00000187942.7	protein_coding	1	1.38	2.86e-06	0.000722
Caudate	EPHA8	ENSG00000070886.6	protein_coding	1	-0.499	0.00102	0.0164
Caudate	ZNF436	ENSG00000125945.10	protein_coding	1	-0.192	0.00258	0.0287
Caudate	PITHD1	ENSG00000057757.5	protein_coding	1	-0.175	0.0014	0.0198
Caudate	IL22RA1	ENSG00000142677.3	protein_coding	1	0.733	0.000309	0.00816
Caudate	PAQR7	ENSG00000182749.5	protein_coding	1	0.315	2.54e-05	0.00206
Caudate	SFN	ENSG00000175793.10	protein_coding	1	-0.593	0.00168	0.0219
Caudate	TRNP1	ENSG00000253368.3	protein_coding	1	-0.315	0.00385	0.0369
Caudate	SLC9A1	ENSG00000090020.6	protein_coding	1	-0.379	0.000221	0.00691
Caudate	FCN3	ENSG00000142748.8	protein_coding	1	0.547	0.00447	0.0404
Caudate	CD164L2	ENSG00000174950.6	protein_coding	1	1.84	8.1e-06	0.00117
Caudate	YTHDF2	ENSG00000198492.10	protein_coding	1	-0.117	0.00164	0.0217
Caudate	EPB41	ENSG00000159023.14	protein_coding	1	-0.358	0.00094	0.0157
Caudate	TMEM200B	ENSG00000253304.1	protein_coding	1	-0.403	0.00303	0.0317
Caudate	SPOCD1	ENSG00000134668.8	protein_coding	1	-0.663	0.00166	0.0218
Caudate	KHDRBS1	ENSG00000121774.13	protein_coding	1	-0.157	0.000416	0.00961
Caudate	KPNA6	ENSG00000025800.9	protein_coding	1	-0.0967	0.00375	0.0363
Caudate	YARS	ENSG00000134684.6	protein_coding	1	-0.525	4.82e-07	0.00036
Caudate	S100PBP	ENSG00000116497.13	protein_coding	1	-0.153	0.00556	0.0463
Caudate	HPCA	ENSG00000121905.5	protein_coding	1	-0.486	0.00178	0.0227
Caudate	RNF19B	ENSG00000116514.12	protein_coding	1	-0.219	0.000281	0.00776
Caudate	SMIM12	ENSG00000163866.8	protein_coding	1	-0.169	0.00222	0.0262
Caudate	PSMB2	ENSG00000126067.7	protein_coding	1	-0.183	3.97e-06	0.00082
Caudate	C1orf216	ENSG00000142686.7	protein_coding	1	-0.252	0.00372	0.0361
Caudate	AGO1	ENSG00000092847.6	protein_coding	1	0.118	0.00239	0.0274
Caudate	RP4-665N4.4	ENSG00000232862.4	pseudogene	1	1.18	3.44e-05	0.0024
Caudate	TEKT2	ENSG00000092850.7	protein_coding	1	0.988	3.05e-06	0.000751
Caudate	COL8A2	ENSG00000171812.6	protein_coding	1	0.397	0.00446	0.0404
Caudate	MEAF6	ENSG00000163875.11	protein_coding	1	-0.161	0.00277	0.0299
Caudate	DNALI1	ENSG00000163879.9	protein_coding	1	0.536	0.000333	0.00849
Caudate	YRDC	ENSG00000196449.3	protein_coding	1	-0.208	0.000111	0.00473
Caudate	RP5-884C9.2	ENSG00000224592.1	lincRNA	1	-0.537	0.000133	0.00516
Caudate	RRAGC	ENSG00000116954.7	protein_coding	1	-0.127	0.00244	0.0277
Caudate	AKIRIN1	ENSG00000174574.11	protein_coding	1	-0.126	0.00298	0.0314
Caudate	HEYL	ENSG00000163909.6	protein_coding	1	0.347	0.00421	0.039
Caudate	CAP1	ENSG00000131236.12	protein_coding	1	-0.196	0.000265	0.00753
Caudate	SMAP2	ENSG00000084070.7	protein_coding	1	-0.255	0.00458	0.041
Caudate	CITED4	ENSG00000179862.5	protein_coding	1	0.314	0.00238	0.0273
Caudate	CTPS1	ENSG00000171793.9	protein_coding	1	-0.205	0.00172	0.0222
Caudate	FOXJ3	ENSG00000198815.4	protein_coding	1	-0.155	0.000647	0.0124
Caudate	RIMKLA	ENSG00000177181.10	protein_coding	1	-0.318	0.00289	0.0307
Caudate	ZMYND12	ENSG00000066185.8	protein_coding	1	0.495	0.000338	0.00851
Caudate	FAM183A	ENSG00000186973.6	protein_coding	1	1.93	3.12e-06	0.000751
Caudate	EBNA1BP2	ENSG00000117395.6	protein_coding	1	-0.215	0.000713	0.0132
Caudate	WDR65	ENSG00000243710.3	protein_coding	1	0.748	0.000259	0.00745
Caudate	DPH2	ENSG00000132768.9	protein_coding	1	-0.159	0.000562	0.0114
Caudate	CCDC24	ENSG00000159214.8	protein_coding	1	0.337	0.000151	0.00555
Caudate	SLC6A9	ENSG00000196517.7	protein_coding	1	0.304	0.00326	0.0332
Caudate	RP5-1198O20.4	ENSG00000230615.2	lincRNA	1	0.348	0.00164	0.0217
Caudate	TCTEX1D4	ENSG00000188396.2	protein_coding	1	0.808	0.00494	0.0432
Caudate	MUTYH	ENSG00000132781.13	protein_coding	1	0.179	0.00452	0.0408
Caudate	NASP	ENSG00000132780.12	protein_coding	1	0.135	0.00323	0.033
Caudate	CCDC17	ENSG00000159588.10	protein_coding	1	0.912	7.52e-05	0.00381
Caudate	RP11-767N6.7	ENSG00000230896.1	sense_intronic	1	0.206	0.00124	0.0186
Caudate	RNF11	ENSG00000123091.4	protein_coding	1	-0.147	0.00278	0.0299
Caudate	KTI12	ENSG00000198841.3	protein_coding	1	-0.184	0.00105	0.0167
Caudate	BTF3L4	ENSG00000134717.13	protein_coding	1	-0.161	6.98e-05	0.00368
Caudate	FAM159A	ENSG00000182183.10	protein_coding	1	0.509	0.00104	0.0166
Caudate	ZYG11B	ENSG00000162378.8	protein_coding	1	-0.171	0.00272	0.0295
Caudate	ECHDC2	ENSG00000121310.12	protein_coding	1	0.204	0.00492	0.0431
Caudate	ACOT11	ENSG00000162390.13	protein_coding	1	0.326	0.00403	0.038
Caudate	MROH7	ENSG00000184313.15	protein_coding	1	0.335	0.00191	0.0237
Caudate	PRKAA2	ENSG00000162409.6	protein_coding	1	-0.229	0.00321	0.0329
Caudate	DAB1	ENSG00000173406.11	protein_coding	1	0.234	0.00598	0.0482
Caudate	FGGY	ENSG00000172456.12	protein_coding	1	0.247	0.0004	0.00938
Caudate	HOOK1	ENSG00000134709.6	protein_coding	1	-0.445	0.00114	0.0175
Caudate	RP11-436K8.1	ENSG00000231252.1	lincRNA	1	0.295	0.00386	0.037
Caudate	NFIA	ENSG00000162599.11	protein_coding	1	0.225	0.00625	0.0498
Caudate	RP4-668G5.1	ENSG00000237928.1	antisense	1	0.557	0.000817	0.0144
Caudate	RP11-230B22.1	ENSG00000235545.1	antisense	1	0.362	0.00567	0.0467
Caudate	DNAJC6	ENSG00000116675.11	protein_coding	1	-0.358	0.000428	0.00973
Caudate	SGIP1	ENSG00000118473.17	protein_coding	1	-0.303	0.00225	0.0264
Caudate	TCTEX1D1	ENSG00000152760.5	protein_coding	1	1.1	1.71e-05	0.00163
Caudate	WDR78	ENSG00000152763.12	protein_coding	1	0.744	3.21e-05	0.0023
Caudate	C1orf141	ENSG00000203963.7	protein_coding	1	0.935	0.000787	0.014
Caudate	GADD45A	ENSG00000116717.7	protein_coding	1	-0.594	0.00053	0.011
Caudate	RPE65	ENSG00000116745.6	protein_coding	1	0.814	0.0046	0.0412
Caudate	LRRC7	ENSG00000033122.14	protein_coding	1	-0.359	0.00309	0.032
Caudate	ANKRD13C	ENSG00000118454.8	protein_coding	1	-0.159	0.000822	0.0144
Caudate	RABGGTB	ENSG00000137955.11	protein_coding	1	-0.115	0.0016	0.0213
Caudate	PRKACB	ENSG00000142875.15	protein_coding	1	-0.275	0.00149	0.0204
Caudate	RPF1	ENSG00000117133.6	protein_coding	1	-0.171	0.00117	0.0178
Caudate	SSX2IP	ENSG00000117155.12	protein_coding	1	-0.307	0.00364	0.0356
Caudate	LPAR3	ENSG00000171517.5	protein_coding	1	0.87	0.00123	0.0184
Caudate	WDR63	ENSG00000162643.8	protein_coding	1	1.74	1.41e-06	0.000507
Caudate	C1orf52	ENSG00000162642.9	protein_coding	1	-0.146	0.00145	0.0202
Caudate	PTGES3P1	ENSG00000234518.1	pseudogene	1	-0.301	0.0059	0.0479
Caudate	LRRC8B	ENSG00000197147.8	protein_coding	1	-0.366	5.97e-05	0.00344
Caudate	RP4-665J23.1	ENSG00000233593.2	lincRNA	1	0.33	0.000294	0.00792
Caudate	HFM1	ENSG00000162669.11	protein_coding	1	0.302	0.00582	0.0475
Caudate	EPHX4	ENSG00000172031.6	protein_coding	1	-0.475	0.000206	0.00656
Caudate	KIAA1107	ENSG00000069712.9	protein_coding	1	-0.406	5e-05	0.00308
Caudate	FNBP1L	ENSG00000137942.12	protein_coding	1	-0.296	0.000245	0.00733
Caudate	RP11-57H12.3	ENSG00000226026.1	antisense	1	0.646	2.47e-05	0.00203
Caudate	SNX7	ENSG00000162627.12	protein_coding	1	0.234	0.00561	0.0465
Caudate	LPPR4	ENSG00000117600.8	protein_coding	1	-0.573	0.000211	0.00667
Caudate	RTCA	ENSG00000137996.8	protein_coding	1	-0.199	4.82e-07	0.00036
Caudate	GPR88	ENSG00000181656.6	protein_coding	1	-0.611	0.000315	0.00828
Caudate	EXTL2	ENSG00000162694.9	protein_coding	1	-0.306	0.000332	0.00848
Caudate	OLFM3	ENSG00000118733.12	protein_coding	1	-0.671	0.000799	0.0142
Caudate	SLC25A24P1	ENSG00000241361.4	pseudogene	1	-0.769	0.00014	0.00536
Caudate	NBPF6	ENSG00000186086.12	protein_coding	1	-1.2	0.000202	0.00647
Caudate	FAM102B	ENSG00000162636.11	protein_coding	1	-0.266	0.00526	0.0449
Caudate	HENMT1	ENSG00000162639.11	protein_coding	1	-0.285	0.00186	0.0233
Caudate	FNDC7	ENSG00000143107.4	protein_coding	1	0.753	0.00149	0.0205
Caudate	WDR47	ENSG00000085433.11	protein_coding	1	-0.279	0.000178	0.00614
Caudate	C1orf194	ENSG00000179902.8	protein_coding	1	0.772	4.07e-05	0.00266
Caudate	SARS	ENSG00000031698.8	protein_coding	1	-0.221	1.51e-05	0.00153
Caudate	PSMA5	ENSG00000143106.8	protein_coding	1	-0.21	1.56e-05	0.00155
Caudate	GSTM5	ENSG00000134201.6	protein_coding	1	0.5	0.0015	0.0205
Caudate	SLC6A17	ENSG00000197106.6	protein_coding	1	-0.522	0.00044	0.00986
Caudate	PIFO	ENSG00000173947.9	protein_coding	1	0.676	6.49e-05	0.00352
Caudate	ATP5F1	ENSG00000116459.6	protein_coding	1	-0.102	0.00315	0.0324
Caudate	RP5-836N10.1	ENSG00000231346.1	lincRNA	1	0.347	0.00377	0.0365
Caudate	KCND3	ENSG00000171385.5	protein_coding	1	-0.237	0.00257	0.0286
Caudate	WNT2B	ENSG00000134245.13	protein_coding	1	-0.341	0.00167	0.0219
Caudate	PPM1J	ENSG00000155367.11	protein_coding	1	0.307	0.00456	0.041
Caudate	RP5-1073O3.7	ENSG00000235527.2	antisense	1	0.359	0.00204	0.0248
Caudate	BCAS2	ENSG00000116752.5	protein_coding	1	-0.185	0.000104	0.00452
Caudate	RP4-666F24.3	ENSG00000233730.1	lincRNA	1	2.63	7.58e-06	0.00115
Caudate	NGF	ENSG00000134259.3	protein_coding	1	-0.414	0.00239	0.0274
Caudate	ATP1A1	ENSG00000163399.11	protein_coding	1	-0.467	5.7e-05	0.00336
Caudate	TRIM45	ENSG00000134253.5	protein_coding	1	0.212	0.00317	0.0326
Caudate	WDR3	ENSG00000065183.11	protein_coding	1	-0.14	0.00314	0.0323
Caudate	SPAG17	ENSG00000155761.9	protein_coding	1	1.35	9.44e-06	0.00124
Caudate	WARS2-IT1	ENSG00000224238.2	antisense	1	0.994	0.00297	0.0313
Caudate	RP6-42F4.1	ENSG00000273131.1	processed_transcript	1	0.162	0.00513	0.0442
Caudate	NOTCH2NL	ENSG00000213240.7	protein_coding	1	0.289	0.000562	0.0114
Caudate	LIX1L	ENSG00000152022.7	protein_coding	1	0.205	0.000945	0.0157
Caudate	GNRHR2	ENSG00000211451.7	pseudogene	1	-0.195	0.000383	0.0092
Caudate	ACP6	ENSG00000162836.7	protein_coding	1	0.251	0.00453	0.0408
Caudate	HIST2H2BF	ENSG00000203814.5	protein_coding	1	0.487	0.0042	0.0389
Caudate	CTSS	ENSG00000163131.6	protein_coding	1	0.409	0.00583	0.0475
Caudate	ARNT	ENSG00000143437.16	protein_coding	1	0.13	0.00328	0.0333
Caudate	MLLT11	ENSG00000213190.2	protein_coding	1	-0.402	0.00133	0.0194
Caudate	RP11-126K1.9	ENSG00000273481.1	lincRNA	1	0.762	0.000226	0.00698
Caudate	RP11-126K1.6	ENSG00000237976.1	antisense	1	0.369	0.00128	0.019
Caudate	TUFT1	ENSG00000143367.11	protein_coding	1	-0.204	0.00484	0.0426
Caudate	RP11-98D18.15	ENSG00000269621.1	antisense	1	0.378	0.00434	0.0397
Caudate	MRPL9	ENSG00000143436.6	protein_coding	1	-0.15	0.000179	0.00615
Caudate	RORC	ENSG00000143365.12	protein_coding	1	0.731	0.000217	0.00682
Caudate	S100A4	ENSG00000196154.7	protein_coding	1	0.517	0.00364	0.0356
Caudate	S100A13	ENSG00000189171.9	protein_coding	1	0.225	0.00526	0.0449
Caudate	TPM3	ENSG00000143549.15	protein_coding	1	-0.178	0.000158	0.00567
Caudate	C1orf189	ENSG00000163263.6	protein_coding	1	1.5	0.00104	0.0166
Caudate	C1orf43	ENSG00000143612.14	protein_coding	1	-0.112	0.000283	0.0078
Caudate	UBE2Q1	ENSG00000160714.5	protein_coding	1	-0.119	0.0044	0.0402
Caudate	CHRNB2	ENSG00000160716.4	protein_coding	1	-0.436	0.00581	0.0475
Caudate	ADAR	ENSG00000160710.11	protein_coding	1	-0.107	0.00233	0.0269
Caudate	DCST2	ENSG00000163354.10	protein_coding	1	0.345	0.00584	0.0476
Caudate	RUSC1	ENSG00000160753.11	protein_coding	1	-0.197	0.00444	0.0403
Caudate	SLC25A44	ENSG00000160785.9	protein_coding	1	-0.138	0.00589	0.0479
Caudate	PMF1	ENSG00000160783.15	protein_coding	1	0.141	0.00184	0.0232
Caudate	C1orf61	ENSG00000125462.12	protein_coding	1	0.299	0.000607	0.0119
Caudate	LRRC71	ENSG00000160838.9	protein_coding	1	1.77	1.15e-06	0.00048
Caudate	FCER1A	ENSG00000179639.6	protein_coding	1	1.2	0.00109	0.017
Caudate	VSIG8	ENSG00000243284.1	protein_coding	1	1.02	0.00011	0.00472
Caudate	CCDC19	ENSG00000213085.5	protein_coding	1	2.06	5.4e-07	0.00036
Caudate	COPA	ENSG00000122218.10	protein_coding	1	-0.124	0.00287	0.0305
Caudate	VANGL2	ENSG00000162738.5	protein_coding	1	0.343	0.000144	0.00545
Caudate	B4GALT3	ENSG00000158850.10	protein_coding	1	-0.139	0.0052	0.0447
Caudate	PCP4L1	ENSG00000248485.1	protein_coding	1	-0.711	0.000193	0.00633
Caudate	C1orf192	ENSG00000188931.3	protein_coding	1	0.776	1.38e-05	0.00151
Caudate	RGS4	ENSG00000117152.9	protein_coding	1	-0.601	0.000254	0.0074
Caudate	MGST3	ENSG00000143198.8	protein_coding	1	-0.139	0.00295	0.0312
Caudate	UCK2	ENSG00000143179.8	protein_coding	1	-0.233	0.000481	0.0105
Caudate	FAM78B	ENSG00000188859.5	protein_coding	1	-0.383	0.000367	0.00895
Caudate	ILDR2	ENSG00000143195.8	protein_coding	1	0.399	4.33e-05	0.00278
Caudate	POU2F1	ENSG00000143190.17	protein_coding	1	0.205	0.000533	0.0111
Caudate	MPC2	ENSG00000143158.6	protein_coding	1	-0.267	2.27e-05	0.00192
Caudate	DCAF6	ENSG00000143164.11	protein_coding	1	-0.274	0.000113	0.00476
Caudate	TIPRL	ENSG00000143155.8	protein_coding	1	-0.188	0.00012	0.00489
Caudate	ATP1B1	ENSG00000143153.8	protein_coding	1	-0.427	0.00159	0.0212
Caudate	FMO2	ENSG00000094963.9	protein_coding	1	0.542	0.00032	0.00832
Caudate	METTL13	ENSG00000010165.15	protein_coding	1	-0.111	0.00555	0.0463
Caudate	DNM3	ENSG00000197959.9	protein_coding	1	-0.33	0.000595	0.0118
Caudate	GPR52	ENSG00000203737.2	protein_coding	1	-1.07	0.000314	0.00828
Caudate	CACYBP	ENSG00000116161.13	protein_coding	1	-0.323	0.0013	0.0191
Caudate	RFWD2	ENSG00000143207.15	protein_coding	1	-0.12	0.000781	0.014
Caudate	RP11-195C7.1	ENSG00000236021.1	antisense	1	-0.439	0.00163	0.0216
Caudate	RASAL2-AS1	ENSG00000224687.1	lincRNA	1	-0.328	0.00138	0.0197
Caudate	RASAL2	ENSG00000075391.12	protein_coding	1	-0.2	0.00191	0.0237
Caudate	FAM20B	ENSG00000116199.7	protein_coding	1	-0.141	0.00544	0.0458
Caudate	ABL2	ENSG00000143322.15	protein_coding	1	-0.162	0.00114	0.0175
Caudate	AXDND1	ENSG00000162779.16	protein_coding	1	0.704	0.00422	0.039
Caudate	RP11-545A16.3	ENSG00000227141.2	pseudogene	1	-0.755	0.000874	0.0149
Caudate	QSOX1	ENSG00000116260.12	protein_coding	1	-0.148	0.0035	0.0347
Caudate	STX6	ENSG00000135823.9	protein_coding	1	-0.133	0.00137	0.0196
Caudate	RGS8	ENSG00000135824.8	protein_coding	1	-1.1	1.94e-05	0.00175
Caudate	NMNAT2	ENSG00000157064.6	protein_coding	1	-0.614	0.000227	0.007
Caudate	C1orf21	ENSG00000116667.8	protein_coding	1	0.176	0.00432	0.0396
Caudate	IVNS1ABP	ENSG00000116679.11	protein_coding	1	-0.32	0.000962	0.0159
Caudate	RP11-547I7.2	ENSG00000237457.2	lincRNA	1	0.415	0.000196	0.00636
Caudate	RGS13	ENSG00000127074.10	protein_coding	1	-1.1	0.00135	0.0195
Caudate	UCHL5	ENSG00000116750.9	protein_coding	1	-0.205	0.000325	0.00837
Caudate	ASPM	ENSG00000066279.12	protein_coding	1	-0.508	0.00395	0.0375
Caudate	CRB1	ENSG00000134376.10	protein_coding	1	0.394	0.000484	0.0105
Caudate	DENND1B	ENSG00000213047.7	protein_coding	1	-0.244	0.00153	0.0208
Caudate	LHX9	ENSG00000143355.11	protein_coding	1	1.79	0.000197	0.00637
Caudate	PTPRC	ENSG00000081237.14	protein_coding	1	0.482	0.00522	0.0447
Caudate	CAMSAP2	ENSG00000118200.10	protein_coding	1	-0.172	0.00446	0.0404
Caudate	C1orf106	ENSG00000163362.6	protein_coding	1	0.477	0.000556	0.0113
Caudate	TIMM17A	ENSG00000134375.6	protein_coding	1	-0.18	0.000324	0.00835
Caudate	PTPN7	ENSG00000143851.11	protein_coding	1	-0.475	0.00189	0.0236
Caudate	PTPRVP	ENSG00000243323.1	pseudogene	1	0.558	0.000317	0.00829
Caudate	UBE2T	ENSG00000077152.5	protein_coding	1	-0.389	0.000758	0.0137
Caudate	SYT2	ENSG00000143858.7	protein_coding	1	-0.819	0.000152	0.00557
Caudate	PCAT6	ENSG00000228288.2	antisense	1	0.321	0.00027	0.00762
Caudate	KLHL12	ENSG00000117153.11	protein_coding	1	-0.111	0.00105	0.0166
Caudate	ADIPOR1	ENSG00000159346.8	protein_coding	1	-0.0686	0.00545	0.0458
Caudate	TMEM183A	ENSG00000163444.7	protein_coding	1	-0.201	0.00026	0.00745
Caudate	PRELP	ENSG00000188783.5	protein_coding	1	0.36	0.00122	0.0184
Caudate	SOX13	ENSG00000143842.10	protein_coding	1	0.31	1.56e-06	0.000523
Caudate	RP11-494K3.2	ENSG00000229657.2	pseudogene	1	0.436	0.00499	0.0435
Caudate	EIF2D	ENSG00000143486.11	protein_coding	1	0.158	9.62e-06	0.00124
Caudate	DYRK3	ENSG00000143479.11	protein_coding	1	0.351	0.00544	0.0458
Caudate	RP11-565N2.2	ENSG00000259815.1	lincRNA	1	-0.882	0.00563	0.0466
Caudate	C1orf74	ENSG00000162757.3	protein_coding	1	-0.225	0.00348	0.0346
Caudate	IRF6	ENSG00000117595.6	protein_coding	1	0.542	0.00488	0.0428
Caudate	KCNH1	ENSG00000143473.7	protein_coding	1	-0.626	0.000612	0.0119
Caudate	RP11-122M14.1	ENSG00000231057.3	antisense	1	2.37	3.34e-08	0.000111
Caudate	LPGAT1	ENSG00000123684.8	protein_coding	1	-0.276	0.0017	0.0221
Caudate	KCNK2	ENSG00000082482.9	protein_coding	1	-0.555	0.000281	0.00776
Caudate	SPATA17	ENSG00000162814.6	protein_coding	1	0.595	0.00188	0.0235
Caudate	C1orf143	ENSG00000228208.2	protein_coding	1	1.19	0.000299	0.00801
Caudate	EPRS	ENSG00000136628.13	protein_coding	1	-0.0904	0.00512	0.0441
Caudate	BPNT1	ENSG00000162813.13	protein_coding	1	-0.119	0.00418	0.0388
Caudate	MIA3	ENSG00000154305.12	protein_coding	1	-0.131	0.00442	0.0402
Caudate	RP11-504P24.8	ENSG00000272645.1	lincRNA	1	0.264	0.000201	0.00647
Caudate	FBXO28	ENSG00000143756.7	protein_coding	1	-0.152	0.000856	0.0148
Caudate	ARF1	ENSG00000143761.9	protein_coding	1	-0.147	0.000709	0.0132
Caudate	RNF187	ENSG00000168159.9	protein_coding	1	-0.198	0.0031	0.0321
Caudate	CCSAP	ENSG00000154429.6	protein_coding	1	-0.26	0.00147	0.0203
Caudate	RP11-552D4.1	ENSG00000228058.1	lincRNA	1	0.712	0.00241	0.0275
Caudate	PGBD5	ENSG00000177614.5	protein_coding	1	-0.244	0.00533	0.0452
Caudate	CAPN9	ENSG00000135773.8	protein_coding	1	0.377	0.00269	0.0293
Caudate	EXOC8	ENSG00000116903.6	protein_coding	1	-0.208	0.000195	0.00635
Caudate	MLK4	ENSG00000143674.6	protein_coding	1	-0.361	0.00542	0.0457
Caudate	KCNK1	ENSG00000135750.10	protein_coding	1	-0.422	3.24e-05	0.00232
Caudate	SLC35F3	ENSG00000183780.8	protein_coding	1	-0.432	0.00122	0.0184
Caudate	RP5-855F14.1	ENSG00000231768.1	lincRNA	1	0.508	0.00139	0.0197
Caudate	TOMM20	ENSG00000173726.6	protein_coding	1	-0.324	0.000262	0.00749
Caudate	LGALS8	ENSG00000116977.14	protein_coding	1	-0.194	0.0014	0.0199
Caudate	ACTN2	ENSG00000077522.8	protein_coding	1	-0.424	0.00299	0.0314
Caudate	RYR2	ENSG00000198626.11	protein_coding	1	-0.529	0.000765	0.0138
Caudate	CHRM3	ENSG00000133019.7	protein_coding	1	-0.669	0.000133	0.00516
Caudate	GREM2	ENSG00000180875.4	protein_coding	1	-0.785	2.41e-05	0.002
Caudate	RGS7	ENSG00000182901.11	protein_coding	1	-0.385	0.00472	0.0419
Caudate	OPN3	ENSG00000054277.8	protein_coding	1	-0.716	3.73e-05	0.00256
Caudate	EFCAB2	ENSG00000203666.8	protein_coding	1	0.317	0.00345	0.0344
Caudate	KIF26B	ENSG00000162849.11	protein_coding	1	0.277	0.000718	0.0133
Caudate	TFB2M	ENSG00000162851.6	protein_coding	1	-0.211	7.53e-05	0.00381
Caudate	CNST	ENSG00000162852.9	protein_coding	1	-0.344	1.49e-05	0.00152
Caudate	OR14I1	ENSG00000189181.3	protein_coding	1	-0.816	0.00527	0.0449
Caudate	ACP1	ENSG00000143727.11	protein_coding	2	-0.229	7.32e-06	0.00113
Caudate	AC116614.1	ENSG00000235688.1	antisense	2	0.854	0.000984	0.016
Caudate	MYT1L	ENSG00000186487.13	protein_coding	2	-0.673	4.83e-05	0.00299
Caudate	AC142528.1	ENSG00000235078.1	antisense	2	0.467	0.00232	0.0269
Caudate	AC010729.2	ENSG00000236106.1	lincRNA	2	1.22	0.00124	0.0186
Caudate	RNF144A-AS1	ENSG00000228203.2	processed_transcript	2	-0.552	0.000911	0.0154
Caudate	ITGB1BP1	ENSG00000119185.8	protein_coding	2	-0.333	5.95e-05	0.00344
Caudate	IAH1	ENSG00000134330.14	protein_coding	2	-0.131	0.000432	0.00973
Caudate	RP11-214N9.1	ENSG00000271855.1	lincRNA	2	0.318	0.000149	0.00555
Caudate	YWHAQ	ENSG00000134308.9	protein_coding	2	-0.139	0.00547	0.0458
Caudate	RP11-95D17.1	ENSG00000269973.1	lincRNA	2	0.192	0.00147	0.0204
Caudate	PDIA6	ENSG00000143870.8	protein_coding	2	-0.24	0.00173	0.0223
Caudate	KCNF1	ENSG00000162975.3	protein_coding	2	-0.382	0.00337	0.0339
Caudate	RP11-345J13.1	ENSG00000226080.1	pseudogene	2	-1.2	6.33e-05	0.00349
Caudate	ROCK2	ENSG00000134318.9	protein_coding	2	-0.183	0.00366	0.0358
Caudate	FAM49A	ENSG00000197872.7	protein_coding	2	-0.252	0.00135	0.0195
Caudate	RAD51AP2	ENSG00000214842.5	protein_coding	2	1.22	0.000321	0.00833
Caudate	RDH14	ENSG00000240857.1	protein_coding	2	-0.198	1.51e-05	0.00153
Caudate	LINC00954	ENSG00000228784.3	lincRNA	2	0.57	0.00395	0.0375
Caudate	KLHL29	ENSG00000119771.10	protein_coding	2	-0.381	0.000377	0.00912
Caudate	ADCY3	ENSG00000138031.10	protein_coding	2	-0.342	0.000428	0.00973
Caudate	DNAJC27	ENSG00000115137.7	protein_coding	2	-0.23	0.00172	0.0222
Caudate	DNAJC27-AS1	ENSG00000224165.1	antisense	2	0.244	0.0011	0.0171
Caudate	KIF3C	ENSG00000084731.9	protein_coding	2	-0.368	0.00066	0.0126
Caudate	GAREML	ENSG00000157833.8	protein_coding	2	0.349	0.000604	0.0119
Caudate	EPT1	ENSG00000138018.13	protein_coding	2	-0.241	0.000497	0.0107
Caudate	DRC1	ENSG00000157856.6	protein_coding	2	1.15	1.47e-05	0.00152
Caudate	C2orf70	ENSG00000173557.10	protein_coding	2	0.882	0.00183	0.023
Caudate	AC074117.10	ENSG00000234072.1	antisense	2	0.21	0.00373	0.0362
Caudate	IFT172	ENSG00000138002.10	protein_coding	2	0.159	0.00109	0.017
Caudate	SLC4A1AP	ENSG00000163798.9	protein_coding	2	-0.187	0.000511	0.0108
Caudate	MRPL33	ENSG00000243147.3	protein_coding	2	-0.206	0.000223	0.00693
Caudate	BRE	ENSG00000158019.16	protein_coding	2	-0.179	0.000726	0.0134
Caudate	PPP1CB	ENSG00000213639.5	protein_coding	2	-0.113	0.00476	0.0421
Caudate	TRMT61B	ENSG00000171103.6	protein_coding	2	-0.178	0.00305	0.0318
Caudate	FAM179A	ENSG00000189350.8	protein_coding	2	0.708	0.000134	0.00519
Caudate	YPEL5	ENSG00000119801.8	protein_coding	2	-0.124	0.00252	0.0283
Caudate	GALNT14	ENSG00000158089.10	protein_coding	2	-0.403	0.000661	0.0126
Caudate	STRN	ENSG00000115808.7	protein_coding	2	-0.262	0.000649	0.0124
Caudate	GPATCH11	ENSG00000152133.10	protein_coding	2	-0.143	0.00138	0.0197
Caudate	CDC42EP3	ENSG00000163171.6	protein_coding	2	-0.245	0.00307	0.0318
Caudate	GALM	ENSG00000143891.12	protein_coding	2	0.305	0.00156	0.0211
Caudate	AC007246.3	ENSG00000231312.2	antisense	2	-0.355	0.000787	0.014
Caudate	COX7A2L	ENSG00000115944.10	protein_coding	2	-0.193	0.00372	0.0361
Caudate	KCNG3	ENSG00000171126.7	protein_coding	2	-0.769	4.18e-06	0.00084
Caudate	HAAO	ENSG00000162882.10	protein_coding	2	0.433	0.000246	0.00733
Caudate	FTOP1	ENSG00000226491.1	pseudogene	2	0.337	0.00413	0.0385
Caudate	AC016735.2	ENSG00000231826.1	lincRNA	2	0.628	7.56e-05	0.00381
Caudate	ABCG8	ENSG00000143921.6	protein_coding	2	-0.407	0.00578	0.0473
Caudate	LRPPRC	ENSG00000138095.14	protein_coding	2	-0.177	0.00058	0.0116
Caudate	PREPL	ENSG00000138078.11	protein_coding	2	-0.337	0.00103	0.0164
Caudate	PRKCE	ENSG00000171132.9	protein_coding	2	-0.495	6.08e-05	0.00344
Caudate	CALM2	ENSG00000143933.12	protein_coding	2	-0.224	0.000385	0.00921
Caudate	EPCAM	ENSG00000119888.6	protein_coding	2	-0.462	0.00382	0.0368
Caudate	MSH2	ENSG00000095002.8	protein_coding	2	-0.261	0.000606	0.0119
Caudate	ERLEC1	ENSG00000068912.9	protein_coding	2	-0.212	0.000133	0.00516
Caudate	PSME4	ENSG00000068878.10	protein_coding	2	-0.193	0.00252	0.0283
Caudate	C2orf73	ENSG00000177994.11	protein_coding	2	0.687	0.00016	0.00572
Caudate	RTN4	ENSG00000115310.13	protein_coding	2	-0.274	7.79e-06	0.00115
Caudate	CLHC1	ENSG00000162994.11	protein_coding	2	0.338	0.00372	0.0361
Caudate	AC012358.7	ENSG00000203327.2	antisense	2	0.595	0.00607	0.0488
Caudate	AC012358.8	ENSG00000240401.4	antisense	2	0.323	0.00364	0.0356
Caudate	BCL11A	ENSG00000119866.16	protein_coding	2	-0.4	0.00385	0.0369
Caudate	B3GNT2	ENSG00000170340.10	protein_coding	2	-0.464	3.97e-05	0.00265
Caudate	MDH1	ENSG00000014641.13	protein_coding	2	-0.398	0.000333	0.00849
Caudate	UGP2	ENSG00000169764.10	protein_coding	2	-0.163	0.00111	0.0173
Caudate	PELI1	ENSG00000197329.7	protein_coding	2	-0.232	0.00294	0.0311
Caudate	LGALSL	ENSG00000119862.8	protein_coding	2	-0.278	0.00112	0.0174
Caudate	AC007386.2	ENSG00000237638.1	lincRNA	2	0.69	0.00332	0.0336
Caudate	RAB1A	ENSG00000138069.12	protein_coding	2	-0.131	6.24e-07	0.000383
Caudate	ACTR2	ENSG00000138071.9	protein_coding	2	-0.248	4.54e-05	0.00287
Caudate	C1D	ENSG00000197223.7	protein_coding	2	-0.162	0.00103	0.0165
Caudate	PNO1	ENSG00000115946.3	protein_coding	2	-0.275	6.11e-05	0.00345
Caudate	PPP3R1	ENSG00000221823.6	protein_coding	2	-0.452	4.98e-05	0.00308
Caudate	ANTXR1	ENSG00000169604.15	protein_coding	2	0.305	0.00127	0.0188
Caudate	AAK1	ENSG00000115977.14	protein_coding	2	-0.458	0.000187	0.00624
Caudate	ANKRD53	ENSG00000144031.7	protein_coding	2	0.683	0.000244	0.00733
Caudate	SFXN5	ENSG00000144040.8	protein_coding	2	0.252	0.00334	0.0337
Caudate	RAB11FIP5	ENSG00000135631.11	protein_coding	2	-0.292	2.55e-05	0.00206
Caudate	CCT7	ENSG00000135624.11	protein_coding	2	-0.127	0.00142	0.02
Caudate	BOLA3	ENSG00000163170.7	protein_coding	2	-0.152	0.00527	0.0449
Caudate	BOLA3-AS1	ENSG00000225439.2	antisense	2	-0.303	0.000613	0.0119
Caudate	DCTN1	ENSG00000204843.8	protein_coding	2	-0.202	0.00162	0.0215
Caudate	DCTN1-AS1	ENSG00000237737.1	antisense	2	-0.534	0.00174	0.0224
Caudate	C2orf81	ENSG00000159239.7	protein_coding	2	0.424	0.000337	0.00851
Caudate	TTC31	ENSG00000115282.15	protein_coding	2	0.124	0.00492	0.0431
Caudate	LOXL3	ENSG00000115318.7	protein_coding	2	0.274	0.000795	0.0141
Caudate	DOK1	ENSG00000115325.9	protein_coding	2	0.263	0.00623	0.0497
Caudate	LRRTM4	ENSG00000176204.9	protein_coding	2	-0.391	0.000967	0.0159
Caudate	AC016716.2	ENSG00000224731.1	antisense	2	0.598	0.00199	0.0244
Caudate	LRRTM1	ENSG00000162951.6	protein_coding	2	-0.471	0.00304	0.0317
Caudate	KCMF1	ENSG00000176407.13	protein_coding	2	-0.128	0.000286	0.00782
Caudate	C2orf68	ENSG00000168887.6	protein_coding	2	0.208	0.00165	0.0217
Caudate	ST3GAL5	ENSG00000115525.12	protein_coding	2	-0.243	0.000243	0.00733
Caudate	IMMT	ENSG00000132305.16	protein_coding	2	-0.129	0.00334	0.0337
Caudate	AC083899.3	ENSG00000204745.3	pseudogene	2	-0.248	0.00482	0.0425
Caudate	AC093616.4	ENSG00000234231.2	pseudogene	2	-0.591	0.00324	0.033
Caudate	TEKT4	ENSG00000163060.6	protein_coding	2	1.54	5.36e-07	0.00036
Caudate	KCNIP3	ENSG00000115041.8	protein_coding	2	0.268	5.77e-05	0.00338
Caudate	GPAT2	ENSG00000186281.8	protein_coding	2	-0.394	0.00307	0.0318
Caudate	CIAO1	ENSG00000144021.2	protein_coding	2	-0.143	0.000529	0.011
Caudate	TMEM131	ENSG00000075568.12	protein_coding	2	-0.181	8.26e-05	0.00397
Caudate	VWA3B	ENSG00000168658.14	protein_coding	2	1.53	1.7e-06	0.000528
Caudate	INPP4A	ENSG00000040933.11	protein_coding	2	-0.261	0.00201	0.0246
Caudate	MGAT4A	ENSG00000071073.8	protein_coding	2	-0.169	0.00229	0.0266
Caudate	KIAA1211L	ENSG00000196872.6	protein_coding	2	-0.439	0.0019	0.0236
Caudate	REV1	ENSG00000135945.5	protein_coding	2	-0.153	0.000798	0.0141
Caudate	AFF3	ENSG00000144218.14	protein_coding	2	-0.366	0.000524	0.011
Caudate	LONRF2	ENSG00000170500.8	protein_coding	2	-0.363	0.00114	0.0175
Caudate	NPAS2	ENSG00000170485.12	protein_coding	2	-0.338	0.000102	0.00446
Caudate	TBC1D8	ENSG00000204634.8	protein_coding	2	-0.237	0.00306	0.0318
Caudate	TMEM182	ENSG00000170417.10	protein_coding	2	-0.236	0.00154	0.0209
Caudate	AC068535.2	ENSG00000227157.1	lincRNA	2	0.708	7.34e-05	0.00377
Caudate	AC068057.2	ENSG00000234177.1	lincRNA	2	0.467	8.07e-05	0.00394
Caudate	SULT1C2	ENSG00000198203.5	protein_coding	2	1.01	0.00485	0.0426
Caudate	GCC2	ENSG00000135968.15	protein_coding	2	-0.22	0.00138	0.0197
Caudate	NPHP1	ENSG00000144061.8	protein_coding	2	0.279	0.00298	0.0314
Caudate	ANAPC1	ENSG00000153107.7	protein_coding	2	-0.214	9.69e-05	0.00436
Caudate	TMEM87B	ENSG00000153214.5	protein_coding	2	-0.164	0.0039	0.0371
Caudate	TTL	ENSG00000114999.7	protein_coding	2	-0.154	0.00524	0.0448
Caudate	PSD4	ENSG00000125637.11	protein_coding	2	0.313	0.00152	0.0207
Caudate	FAM138B	ENSG00000226516.3	lincRNA	2	0.843	0.000868	0.0149
Caudate	DDX11L2	ENSG00000236397.2	pseudogene	2	0.844	5.89e-05	0.00343
Caudate	RPL23AP7	ENSG00000240356.2	pseudogene	2	0.383	0.00074	0.0135
Caudate	ACTR3	ENSG00000115091.7	protein_coding	2	-0.169	2.96e-05	0.0022
Caudate	AC066593.1	ENSG00000235026.1	antisense	2	-0.317	0.00408	0.0383
Caudate	C1QL2	ENSG00000144119.3	protein_coding	2	0.384	0.00278	0.0299
Caudate	PCDP1	ENSG00000163075.8	protein_coding	2	0.398	0.00233	0.0269
Caudate	MTND5P28	ENSG00000223549.1	pseudogene	2	0.565	0.00609	0.0489
Caudate	RALB	ENSG00000144118.9	protein_coding	2	-0.114	0.00283	0.0303
Caudate	GLI2	ENSG00000074047.16	protein_coding	2	0.45	0.000574	0.0115
Caudate	GYPC	ENSG00000136732.10	protein_coding	2	0.404	0.000247	0.00734
Caudate	GPR17	ENSG00000144230.12	protein_coding	2	0.587	0.000229	0.00704
Caudate	RAB6C	ENSG00000222014.4	protein_coding	2	-0.424	0.00285	0.0304
Caudate	AC018865.8	ENSG00000180178.6	pseudogene	2	0.833	0.0006	0.0119
Caudate	AC018865.9	ENSG00000231240.1	pseudogene	2	1.08	0.000581	0.0116
Caudate	CCDC74B	ENSG00000152076.14	protein_coding	2	0.618	9.02e-05	0.00419
Caudate	FAM168B	ENSG00000152102.13	protein_coding	2	-0.21	6.49e-05	0.00352
Caudate	PLEKHB2	ENSG00000115762.12	protein_coding	2	-0.293	2.25e-06	0.000626
Caudate	AC131180.4	ENSG00000231431.3	pseudogene	2	2.8	1.82e-07	0.000266
Caudate	CCDC74A	ENSG00000163040.10	protein_coding	2	0.264	0.00468	0.0417
Caudate	MAP3K19	ENSG00000176601.7	protein_coding	2	2.08	2.19e-07	0.000301
Caudate	R3HDM1	ENSG00000048991.12	protein_coding	2	-0.251	0.0059	0.0479
Caudate	AC093391.2	ENSG00000231890.3	antisense	2	-0.389	0.00234	0.0269
Caudate	HNMT	ENSG00000150540.9	protein_coding	2	0.218	0.00382	0.0368
Caudate	NXPH2	ENSG00000144227.4	protein_coding	2	-0.922	0.000607	0.0119
Caudate	ARHGAP15	ENSG00000075884.8	protein_coding	2	0.578	0.000403	0.00941
Caudate	MMADHC	ENSG00000168288.8	protein_coding	2	-0.133	0.000225	0.00698
Caudate	RND3	ENSG00000115963.9	protein_coding	2	-0.351	0.00299	0.0314
Caudate	CACNB4	ENSG00000182389.14	protein_coding	2	-0.468	0.000276	0.00773
Caudate	RPRM	ENSG00000177519.3	protein_coding	2	0.37	0.00275	0.0298
Caudate	ACVR1C	ENSG00000123612.11	protein_coding	2	-0.57	5.62e-05	0.00336
Caudate	DAPL1	ENSG00000163331.6	protein_coding	2	0.515	0.00168	0.0219
Caudate	RBMS1	ENSG00000153250.13	protein_coding	2	-0.21	0.000102	0.00446
Caudate	PSMD14	ENSG00000115233.7	protein_coding	2	-0.132	0.000112	0.00474
Caudate	SLC4A10	ENSG00000144290.12	protein_coding	2	-0.832	1.21e-05	0.0014
Caudate	GRB14	ENSG00000115290.5	protein_coding	2	-0.394	0.000317	0.00829
Caudate	SCN2A	ENSG00000136531.9	protein_coding	2	-0.47	0.00226	0.0265
Caudate	CSRNP3	ENSG00000178662.11	protein_coding	2	-0.34	0.00174	0.0224
Caudate	CERS6	ENSG00000172292.10	protein_coding	2	-0.259	0.00305	0.0318
Caudate	ABCB11	ENSG00000073734.8	protein_coding	2	1.15	0.000728	0.0134
Caudate	CCDC173	ENSG00000154479.8	protein_coding	2	0.786	9.74e-05	0.00436
Caudate	SSB	ENSG00000138385.11	protein_coding	2	-0.0994	0.00432	0.0396
Caudate	UBR3	ENSG00000144357.12	protein_coding	2	-0.2	0.00249	0.0281
Caudate	GAD1	ENSG00000128683.9	protein_coding	2	-0.644	0.000148	0.00554
Caudate	AC007405.8	ENSG00000235934.1	antisense	2	-0.55	0.00419	0.0389
Caudate	GORASP2	ENSG00000115806.8	protein_coding	2	-0.0983	0.00162	0.0215
Caudate	SLC25A12	ENSG00000115840.9	protein_coding	2	-0.264	0.00108	0.017
Caudate	RP11-394I13.2	ENSG00000271151.1	lincRNA	2	0.759	0.000131	0.00512
Caudate	OLA1	ENSG00000138430.11	protein_coding	2	-0.294	5.65e-05	0.00336
Caudate	AC018470.4	ENSG00000231453.1	lincRNA	2	-0.586	0.00118	0.0179
Caudate	SP9	ENSG00000217236.1	protein_coding	2	-0.575	0.00026	0.00745
Caudate	GPR155	ENSG00000163328.9	protein_coding	2	-0.293	0.00233	0.0269
Caudate	CHN1	ENSG00000128656.9	protein_coding	2	-0.356	0.000994	0.0161
Caudate	ATP5G3	ENSG00000154518.5	protein_coding	2	-0.215	0.00019	0.00631
Caudate	MTX2	ENSG00000128654.9	protein_coding	2	-0.201	9.6e-05	0.00434
Caudate	TTC30B	ENSG00000196659.9	protein_coding	2	0.279	0.0038	0.0367
Caudate	TTC30A	ENSG00000197557.6	protein_coding	2	0.265	0.00571	0.0469
Caudate	AC009948.5	ENSG00000223960.2	antisense	2	0.203	0.00492	0.0431
Caudate	PLEKHA3	ENSG00000116095.6	protein_coding	2	-0.11	0.00498	0.0434
Caudate	ZNF385B	ENSG00000144331.14	protein_coding	2	-0.709	7.38e-06	0.00113
Caudate	CERKL	ENSG00000188452.9	protein_coding	2	0.783	0.00233	0.0269
Caudate	NCKAP1	ENSG00000061676.10	protein_coding	2	-0.21	0.000303	0.00807
Caudate	ZNF804A	ENSG00000170396.6	protein_coding	2	-0.513	0.00188	0.0235
Caudate	ZC3H15	ENSG00000065548.13	protein_coding	2	-0.225	5.21e-07	0.00036
Caudate	GULP1	ENSG00000144366.11	protein_coding	2	-0.413	0.000502	0.0107
Caudate	SLC40A1	ENSG00000138449.6	protein_coding	2	0.28	0.00305	0.0318
Caudate	RP11-647K16.1	ENSG00000272979.1	antisense	2	0.59	0.00506	0.0439
Caudate	GLS	ENSG00000115419.8	protein_coding	2	-0.364	0.00013	0.00512
Caudate	HECW2	ENSG00000138411.6	protein_coding	2	-0.293	0.000494	0.0106
Caudate	COQ10B	ENSG00000115520.4	protein_coding	2	-0.167	4.4e-05	0.0028
Caudate	MOB4	ENSG00000115540.10	protein_coding	2	-0.193	0.00244	0.0277
Caudate	SATB2-AS1	ENSG00000225953.2	antisense	2	2	6.78e-06	0.00107
Caudate	C2orf47	ENSG00000162972.6	protein_coding	2	-0.153	0.00015	0.00555
Caudate	SGOL2	ENSG00000163535.13	protein_coding	2	0.233	0.0051	0.044
Caudate	FAM126B	ENSG00000155744.5	protein_coding	2	-0.256	0.000619	0.012
Caudate	RP11-107N15.1	ENSG00000273209.1	lincRNA	2	0.51	0.000519	0.0109
Caudate	AC079354.1	ENSG00000182329.6	protein_coding	2	1.2	1.35e-05	0.0015
Caudate	SUMO1	ENSG00000116030.12	protein_coding	2	-0.126	0.00165	0.0217
Caudate	WDR12	ENSG00000138442.5	protein_coding	2	-0.206	0.00105	0.0166
Caudate	ABI2	ENSG00000138443.11	protein_coding	2	-0.191	0.00546	0.0458
Caudate	PARD3B	ENSG00000116117.13	protein_coding	2	0.351	0.000146	0.00547
Caudate	ADAM23	ENSG00000114948.8	protein_coding	2	-0.482	0.000713	0.0132
Caudate	CRYGD	ENSG00000118231.4	protein_coding	2	-0.586	0.00237	0.0272
Caudate	C2orf80	ENSG00000188674.6	protein_coding	2	-0.448	0.00475	0.0421
Caudate	MAP2	ENSG00000078018.15	protein_coding	2	-0.376	0.0017	0.0221
Caudate	UNC80	ENSG00000144406.14	protein_coding	2	-0.346	0.00597	0.0482
Caudate	ACADL	ENSG00000115361.3	protein_coding	2	0.461	0.00142	0.02
Caudate	AC007970.1	ENSG00000234281.1	antisense	2	-0.408	0.00381	0.0367
Caudate	LANCL1	ENSG00000115365.7	protein_coding	2	-0.324	0.000602	0.0119
Caudate	ARPC2	ENSG00000163466.11	protein_coding	2	-0.196	4.32e-06	0.000841
Caudate	RP11-378A13.1	ENSG00000261338.1	sense_overlapping	2	-0.337	0.00305	0.0318
Caudate	C2orf62	ENSG00000158428.3	protein_coding	2	1.27	7.97e-06	0.00115
Caudate	CTDSP1	ENSG00000144579.3	protein_coding	2	0.263	0.000784	0.014
Caudate	PRKAG3	ENSG00000115592.7	protein_coding	2	-0.666	0.000695	0.0131
Caudate	WNT6	ENSG00000115596.3	protein_coding	2	-0.422	0.00229	0.0266
Caudate	AC097468.4	ENSG00000224090.1	antisense	2	1.71	0.00154	0.0209
Caudate	CCDC108	ENSG00000181378.9	protein_coding	2	1.34	2.71e-06	0.000715
Caudate	FAM134A	ENSG00000144567.6	protein_coding	2	-0.18	0.00145	0.0202
Caudate	GLB1L	ENSG00000163521.11	protein_coding	2	0.375	0.00527	0.0449
Caudate	TUBA4B	ENSG00000243910.3	pseudogene	2	1.86	2.52e-05	0.00206
Caudate	PTPRN	ENSG00000054356.9	protein_coding	2	-0.472	0.00353	0.0349
Caudate	EPHA4	ENSG00000116106.7	protein_coding	2	-0.284	0.00409	0.0383
Caudate	SGPP2	ENSG00000163082.9	protein_coding	2	-0.568	3.16e-06	0.000752
Caudate	SCG2	ENSG00000171951.4	protein_coding	2	-0.628	0.000789	0.014
Caudate	AP1S3	ENSG00000152056.12	protein_coding	2	-0.378	0.000975	0.0159
Caudate	MRPL44	ENSG00000135900.3	protein_coding	2	-0.109	0.00625	0.0498
Caudate	FAM124B	ENSG00000124019.9	protein_coding	2	0.581	0.00175	0.0224
Caudate	NYAP2	ENSG00000144460.10	protein_coding	2	-0.572	0.000439	0.00985
Caudate	RP11-314B1.2	ENSG00000273301.1	lincRNA	2	-0.444	0.00214	0.0255
Caudate	AGFG1	ENSG00000173744.13	protein_coding	2	-0.144	0.00117	0.0178
Caudate	SP140	ENSG00000079263.14	protein_coding	2	0.449	4e-05	0.00265
Caudate	CAB39	ENSG00000135932.6	protein_coding	2	-0.165	0.000156	0.00562
Caudate	GPR55	ENSG00000135898.5	protein_coding	2	-0.6	0.00263	0.0289
Caudate	PSMD1	ENSG00000173692.8	protein_coding	2	-0.132	0.000872	0.0149
Caudate	KCNJ13	ENSG00000115474.6	protein_coding	2	1.54	0.000151	0.00555
Caudate	NGEF	ENSG00000066248.10	protein_coding	2	-0.611	0.000304	0.0081
Caudate	ATG16L1	ENSG00000085978.17	protein_coding	2	-0.236	0.000766	0.0138
Caudate	DGKD	ENSG00000077044.5	protein_coding	2	-0.179	0.00264	0.029
Caudate	USP40	ENSG00000085982.9	protein_coding	2	0.153	0.00355	0.0349
Caudate	AC097713.3	ENSG00000228162.1	lincRNA	2	2.6	6.71e-06	0.00106
Caudate	ASB18	ENSG00000182177.9	protein_coding	2	-0.72	0.00116	0.0177
Caudate	COPS8	ENSG00000198612.6	protein_coding	2	-0.115	0.00312	0.0322
Caudate	FAM132B	ENSG00000178752.11	protein_coding	2	-0.542	0.00182	0.023
Caudate	AC104809.3	ENSG00000226321.3	protein_coding	2	2.34	6.55e-06	0.00106
Caudate	AC104809.4	ENSG00000233392.1	processed_transcript	2	1.35	2.63e-06	0.000712
Caudate	AC104809.2	ENSG00000223991.1	antisense	2	2.27	2.83e-05	0.00216
Caudate	CNTN4	ENSG00000144619.10	protein_coding	3	-0.397	0.00132	0.0193
Caudate	IL5RA	ENSG00000091181.15	protein_coding	3	2.21	1.46e-05	0.00152
Caudate	ITPR1-AS1	ENSG00000231249.1	antisense	3	-0.406	0.00617	0.0493
Caudate	ITPR1	ENSG00000150995.13	protein_coding	3	-0.507	0.000186	0.00623
Caudate	ARL8B	ENSG00000134108.8	protein_coding	3	-0.163	2.73e-05	0.00211
Caudate	LHFPL4	ENSG00000156959.7	protein_coding	3	-0.459	0.00298	0.0314
Caudate	CAMK1	ENSG00000134072.6	protein_coding	3	-0.209	0.00304	0.0318
Caudate	TTLL3	ENSG00000214021.11	protein_coding	3	0.218	0.00133	0.0194
Caudate	IL17RC	ENSG00000163702.14	protein_coding	3	0.274	0.00121	0.0183
Caudate	EMC3	ENSG00000125037.8	protein_coding	3	-0.137	7.18e-05	0.00373
Caudate	AC022007.5	ENSG00000206567.5	lincRNA	3	0.237	0.00555	0.0463
Caudate	ATP2B2	ENSG00000157087.12	protein_coding	3	-0.375	0.00177	0.0226
Caudate	SLC6A11	ENSG00000132164.5	protein_coding	3	0.574	3.17e-05	0.00229
Caudate	MKRN2	ENSG00000075975.11	protein_coding	3	-0.113	0.00331	0.0335
Caudate	IQSEC1	ENSG00000144711.9	protein_coding	3	-0.193	0.00546	0.0458
Caudate	RP11-536I6.1	ENSG00000251576.1	lincRNA	3	2.87	5.96e-07	0.000376
Caudate	SH3BP5	ENSG00000131370.11	protein_coding	3	-0.357	0.00146	0.0202
Caudate	METTL6	ENSG00000206562.7	protein_coding	3	-0.12	0.00212	0.0253
Caudate	EAF1	ENSG00000144597.9	protein_coding	3	-0.284	1.27e-06	0.000487
Caudate	EAF1-AS1	ENSG00000249786.3	antisense	3	0.573	0.00564	0.0466
Caudate	BTD	ENSG00000169814.8	protein_coding	3	0.22	0.00433	0.0397
Caudate	PLCL2	ENSG00000154822.11	protein_coding	3	-0.384	0.000116	0.00482
Caudate	EFHB	ENSG00000163576.13	protein_coding	3	0.876	0.000533	0.0111
Caudate	ZNF385D	ENSG00000151789.5	protein_coding	3	-0.462	0.000267	0.00756
Caudate	UBE2E2	ENSG00000182247.5	protein_coding	3	-0.231	0.000249	0.00736
Caudate	NKIRAS1	ENSG00000197885.6	protein_coding	3	-0.292	8.86e-06	0.00124
Caudate	THRB	ENSG00000151090.13	protein_coding	3	-0.294	0.00157	0.0211
Caudate	AC133680.1	ENSG00000237838.1	lincRNA	3	-0.983	0.000705	0.0132
Caudate	RARB	ENSG00000077092.14	protein_coding	3	-0.407	0.0007	0.0131
Caudate	CMC1	ENSG00000187118.8	protein_coding	3	-0.133	0.00215	0.0255
Caudate	AZI2	ENSG00000163512.9	protein_coding	3	-0.175	0.000786	0.014
Caudate	OSBPL10	ENSG00000144645.9	protein_coding	3	-0.281	0.000701	0.0131
Caudate	DYNC1LI1	ENSG00000144635.4	protein_coding	3	-0.198	1.53e-05	0.00154
Caudate	UBP1	ENSG00000153560.7	protein_coding	3	-0.186	0.00122	0.0184
Caudate	ARPP21	ENSG00000172995.12	protein_coding	3	-0.487	0.00157	0.0211
Caudate	DCLK3	ENSG00000163673.6	protein_coding	3	-0.54	0.0019	0.0236
Caudate	RPL21P135	ENSG00000235482.1	pseudogene	3	-0.451	0.00388	0.037
Caudate	DLEC1	ENSG00000008226.15	protein_coding	3	1.18	1.57e-05	0.00155
Caudate	TTC21A	ENSG00000168026.12	protein_coding	3	0.39	9.1e-05	0.00421
Caudate	EIF1B	ENSG00000114784.3	protein_coding	3	-0.268	9.19e-06	0.00124
Caudate	ENTPD3	ENSG00000168032.4	protein_coding	3	-0.792	4.37e-05	0.00279
Caudate	ULK4	ENSG00000168038.6	protein_coding	3	0.39	0.00269	0.0293
Caudate	CCDC13	ENSG00000244607.1	protein_coding	3	0.508	1.54e-05	0.00154
Caudate	CCDC13-AS1	ENSG00000173811.6	antisense	3	0.372	0.000607	0.0119
Caudate	KIF15	ENSG00000163808.12	protein_coding	3	0.233	0.0021	0.0252
Caudate	KLHL18	ENSG00000114648.7	protein_coding	3	-0.197	1.71e-05	0.00163
Caudate	RP11-708J19.1	ENSG00000260236.1	antisense	3	0.218	0.00263	0.0289
Caudate	PLXNB1	ENSG00000164050.8	protein_coding	3	0.243	0.000757	0.0137
Caudate	TREX1	ENSG00000213689.5	protein_coding	3	0.272	0.00134	0.0195
Caudate	RP13-131K19.2	ENSG00000223343.1	antisense	3	0.473	0.00189	0.0236
Caudate	MST1	ENSG00000173531.11	protein_coding	3	0.184	0.00589	0.0478
Caudate	RNF123	ENSG00000164068.11	protein_coding	3	-0.218	0.00325	0.0331
Caudate	CDHR4	ENSG00000187492.4	protein_coding	3	1.79	0.000117	0.00485
Caudate	ZMYND10	ENSG00000004838.9	protein_coding	3	0.786	3.47e-05	0.00242
Caudate	DOCK3	ENSG00000088538.12	protein_coding	3	-0.264	0.0026	0.0288
Caudate	ABHD14B	ENSG00000114779.15	protein_coding	3	0.223	0.000113	0.00476
Caudate	ALAS1	ENSG00000023330.10	protein_coding	3	-0.244	2.12e-05	0.00184
Caudate	WDR82	ENSG00000164091.7	protein_coding	3	-0.143	0.000736	0.0134
Caudate	TNNC1	ENSG00000114854.3	protein_coding	3	0.677	0.00374	0.0363
Caudate	SMIM4	ENSG00000168273.3	protein_coding	3	0.174	0.00248	0.0281
Caudate	GNL3	ENSG00000163938.12	protein_coding	3	-0.232	5.17e-06	0.000935
Caudate	CACNA2D3	ENSG00000157445.10	protein_coding	3	-0.541	0.00043	0.00973
Caudate	ARHGEF3	ENSG00000163947.7	protein_coding	3	-0.316	0.000126	0.00499
Caudate	IL17RD	ENSG00000144730.12	protein_coding	3	0.347	0.000201	0.00647
Caudate	DNAH12	ENSG00000174844.10	protein_coding	3	1.43	1.2e-06	0.000487
Caudate	PDE12	ENSG00000174840.8	protein_coding	3	-0.125	0.00251	0.0282
Caudate	ARF4	ENSG00000168374.6	protein_coding	3	-0.166	2.95e-05	0.0022
Caudate	SLMAP	ENSG00000163681.10	protein_coding	3	-0.256	0.000919	0.0155
Caudate	C3orf14	ENSG00000114405.6	protein_coding	3	-0.242	0.00146	0.0202
Caudate	CADPS	ENSG00000163618.13	protein_coding	3	-0.466	0.000527	0.011
Caudate	SNTN	ENSG00000188817.3	protein_coding	3	2.18	0.000566	0.0115
Caudate	THOC7	ENSG00000163634.7	protein_coding	3	-0.157	0.00146	0.0202
Caudate	KBTBD8	ENSG00000163376.7	protein_coding	3	-0.428	0.000103	0.0045
Caudate	ARL6IP5	ENSG00000144746.6	protein_coding	3	-0.23	3.31e-06	0.000758
Caudate	FOXP1	ENSG00000114861.14	protein_coding	3	-0.209	0.0038	0.0367
Caudate	EIF4E3	ENSG00000163412.8	protein_coding	3	-0.256	0.00057	0.0115
Caudate	ROBO2	ENSG00000185008.13	protein_coding	3	-0.677	6.86e-05	0.00363
Caudate	POU1F1	ENSG00000064835.6	protein_coding	3	-0.635	0.00395	0.0375
Caudate	MTRNR2L12	ENSG00000269028.2	protein_coding	3	0.52	0.00196	0.0241
Caudate	ARL6	ENSG00000113966.5	protein_coding	3	-0.258	0.00035	0.00869
Caudate	COL8A1	ENSG00000144810.11	protein_coding	3	0.817	0.00302	0.0317
Caudate	TOMM70A	ENSG00000154174.7	protein_coding	3	-0.486	0.000148	0.00552
Caudate	LNP1	ENSG00000206535.3	protein_coding	3	-0.37	0.00142	0.02
Caudate	TMEM45A	ENSG00000181458.6	protein_coding	3	-0.353	0.000822	0.0144
Caudate	TFG	ENSG00000114354.8	protein_coding	3	-0.0885	0.00185	0.0232
Caudate	ZBTB11	ENSG00000066422.4	protein_coding	3	-0.214	0.00108	0.017
Caudate	NXPE3	ENSG00000144815.10	protein_coding	3	-0.18	0.0043	0.0396
Caudate	RP11-115H18.1	ENSG00000273125.1	lincRNA	3	-0.394	0.00306	0.0318
Caudate	CD47	ENSG00000196776.10	protein_coding	3	-0.205	7.45e-05	0.0038
Caudate	MYH15	ENSG00000144821.5	protein_coding	3	0.386	1.03e-06	0.000476
Caudate	KIAA1524	ENSG00000163507.9	protein_coding	3	-0.384	0.000387	0.00924
Caudate	DPPA4	ENSG00000121570.8	protein_coding	3	0.691	0.00595	0.0481
Caudate	C3orf52	ENSG00000114529.8	protein_coding	3	-0.891	2.84e-06	0.000722
Caudate	RP11-757F18.5	ENSG00000261488.1	antisense	3	-0.703	0.00416	0.0387
Caudate	CD200	ENSG00000091972.14	protein_coding	3	-0.385	3.12e-05	0.00228
Caudate	WDR52	ENSG00000206530.4	protein_coding	3	0.635	0.000127	0.00502
Caudate	NAA50	ENSG00000121579.8	protein_coding	3	-0.149	0.00342	0.0342
Caudate	ATP6V1A	ENSG00000114573.5	protein_coding	3	-0.287	4.78e-05	0.00298
Caudate	MAATS1	ENSG00000183833.12	protein_coding	3	0.407	0.000416	0.00961
Caudate	STXBP5L	ENSG00000145087.8	protein_coding	3	-0.497	0.001	0.0162
Caudate	SLC15A2	ENSG00000163406.6	protein_coding	3	0.397	9.79e-05	0.00437
Caudate	FAM162A	ENSG00000114023.11	protein_coding	3	-0.177	0.00281	0.0301
Caudate	PTPLB	ENSG00000206527.5	protein_coding	3	-0.246	5.79e-05	0.00338
Caudate	KALRN	ENSG00000160145.11	protein_coding	3	-0.2	0.00132	0.0193
Caudate	OR7E29P	ENSG00000243429.1	pseudogene	3	0.514	0.00145	0.0202
Caudate	ALDH1L1-AS2	ENSG00000246022.2	antisense	3	0.417	8e-05	0.00394
Caudate	CCDC37	ENSG00000163885.7	protein_coding	3	0.887	3.84e-05	0.0026
Caudate	UROC1	ENSG00000159650.4	protein_coding	3	0.662	0.00135	0.0195
Caudate	COPG1	ENSG00000181789.10	protein_coding	3	-0.162	0.000287	0.00785
Caudate	HMCES	ENSG00000183624.9	protein_coding	3	-0.174	0.00411	0.0384
Caudate	H1FX-AS1	ENSG00000206417.4	antisense	3	0.294	0.000974	0.0159
Caudate	EFCAB12	ENSG00000172771.7	protein_coding	3	1.03	1.07e-07	0.000167
Caudate	NEK11	ENSG00000114670.9	protein_coding	3	0.486	0.000107	0.00462
Caudate	MRPL3	ENSG00000114686.4	protein_coding	3	-0.208	1.91e-08	7.88e-05
Caudate	TMEM108	ENSG00000144868.9	protein_coding	3	0.454	1.2e-05	0.0014
Caudate	RAB6B	ENSG00000154917.6	protein_coding	3	-0.238	0.00286	0.0305
Caudate	RP11-657O9.1	ENSG00000240086.1	processed_transcript	3	-0.737	0.000355	0.00877
Caudate	DZIP1L	ENSG00000158163.10	protein_coding	3	0.811	4.6e-07	0.00036
Caudate	ARMC8	ENSG00000114098.13	protein_coding	3	-0.134	0.00112	0.0173
Caudate	NME9	ENSG00000181322.9	protein_coding	3	0.426	0.000366	0.00895
Caudate	PIK3CB	ENSG00000051382.4	protein_coding	3	-0.261	0.000155	0.00561
Caudate	RNF7	ENSG00000114125.9	protein_coding	3	-0.136	0.000828	0.0145
Caudate	PLS1	ENSG00000120756.8	protein_coding	3	-0.403	0.00185	0.0232
Caudate	PAQR9	ENSG00000188582.4	protein_coding	3	-0.666	5.76e-05	0.00338
Caudate	CHST2	ENSG00000175040.4	protein_coding	3	-0.279	0.000263	0.0075
Caudate	PLSCR5	ENSG00000231213.2	protein_coding	3	-1.12	0.00048	0.0105
Caudate	ZIC4	ENSG00000174963.13	protein_coding	3	0.309	0.00116	0.0178
Caudate	ZIC1	ENSG00000152977.5	protein_coding	3	0.343	0.00222	0.0262
Caudate	ANKUB1	ENSG00000206199.5	protein_coding	3	2.03	1.07e-07	0.000167
Caudate	PFN2	ENSG00000070087.9	protein_coding	3	-0.228	0.00039	0.00927
Caudate	snoU13	ENSG00000243321.2	lincRNA	3	0.538	0.00567	0.0467
Caudate	SIAH2	ENSG00000181788.3	protein_coding	3	-0.296	0.00203	0.0247
Caudate	FAM188B2	ENSG00000214237.5	protein_coding	3	-0.889	0.000779	0.014
Caudate	IGSF10	ENSG00000152580.8	protein_coding	3	1.05	1.36e-06	0.000501
Caudate	RP11-64D22.2	ENSG00000240602.3	pseudogene	3	1.4	0.00052	0.0109
Caudate	ARHGEF26-AS1	ENSG00000243069.3	processed_transcript	3	0.277	0.00326	0.0331
Caudate	DHX36	ENSG00000174953.9	protein_coding	3	-0.212	0.00104	0.0166
Caudate	GPR149	ENSG00000174948.5	protein_coding	3	-0.759	0.00133	0.0194
Caudate	MME	ENSG00000196549.6	protein_coding	3	-0.651	9.66e-05	0.00436
Caudate	PLCH1-AS1	ENSG00000239508.1	antisense	3	-1.65	8.49e-05	0.00402
Caudate	KCNAB1	ENSG00000169282.13	protein_coding	3	-0.722	6.12e-05	0.00345
Caudate	LINC00886	ENSG00000240875.1	lincRNA	3	0.334	0.00477	0.0421
Caudate	LINC00880	ENSG00000243629.1	lincRNA	3	1.43	0.000593	0.0118
Caudate	KRT18P34	ENSG00000244515.1	pseudogene	3	-0.668	0.000419	0.00961
Caudate	C3orf55	ENSG00000174899.6	protein_coding	3	-0.785	0.000208	0.00661
Caudate	B3GALNT1	ENSG00000169255.9	protein_coding	3	-0.209	0.00161	0.0214
Caudate	SPTSSB	ENSG00000196542.4	protein_coding	3	-0.349	0.0036	0.0353
Caudate	ZBBX	ENSG00000169064.8	protein_coding	3	1.08	4.7e-06	0.000892
Caudate	WDR49	ENSG00000174776.6	protein_coding	3	0.709	9.72e-05	0.00436
Caudate	SERPINI1	ENSG00000163536.8	protein_coding	3	-0.236	0.00628	0.0499
Caudate	RP11-298O21.5	ENSG00000244227.1	lincRNA	3	2.78	1.75e-06	0.00053
Caudate	GOLIM4	ENSG00000173905.4	protein_coding	3	0.247	0.00423	0.0391
Caudate	LRRC34	ENSG00000171757.11	protein_coding	3	0.265	0.00234	0.027
Caudate	SLC7A14	ENSG00000013293.5	protein_coding	3	-0.397	0.00497	0.0434
Caudate	EIF5A2	ENSG00000163577.3	protein_coding	3	-0.3	3.12e-05	0.00228
Caudate	TMEM212	ENSG00000186329.5	protein_coding	3	1.52	0.00444	0.0403
Caudate	NCEH1	ENSG00000144959.5	protein_coding	3	-0.591	7.77e-06	0.00115
Caudate	KCNMB2	ENSG00000197584.7	protein_coding	3	0.346	0.00323	0.033
Caudate	RP11-145M9.4	ENSG00000269728.1	lincRNA	3	0.307	0.00279	0.03
Caudate	B3GNT5	ENSG00000176597.7	protein_coding	3	0.426	0.00349	0.0346
Caudate	AP2M1	ENSG00000161203.9	protein_coding	3	-0.166	0.00177	0.0226
Caudate	ABCF3	ENSG00000161204.7	protein_coding	3	-0.115	0.00573	0.047
Caudate	RP11-329B9.4	ENSG00000272970.1	lincRNA	3	0.3	0.00614	0.0492
Caudate	RP11-329B9.5	ENSG00000272922.1	lincRNA	3	0.379	0.00211	0.0253
Caudate	SENP2	ENSG00000163904.8	protein_coding	3	-0.144	0.00072	0.0133
Caudate	RP11-573D15.9	ENSG00000263826.1	antisense	3	-0.334	0.00362	0.0355
Caudate	EIF4A2	ENSG00000156976.10	protein_coding	3	-0.236	6.06e-05	0.00344
Caudate	RPL39L	ENSG00000163923.5	protein_coding	3	-0.228	0.00231	0.0268
Caudate	TP63	ENSG00000073282.8	protein_coding	3	0.754	0.000785	0.014
Caudate	GMNC	ENSG00000205835.4	protein_coding	3	1.37	0.000442	0.00988
Caudate	ATP13A5	ENSG00000187527.6	protein_coding	3	0.312	0.00387	0.037
Caudate	OPA1	ENSG00000198836.4	protein_coding	3	-0.244	0.000189	0.00629
Caudate	RP11-699L21.1	ENSG00000214146.2	lincRNA	3	0.775	0.0028	0.0301
Caudate	GP5	ENSG00000178732.4	protein_coding	3	1.02	0.000931	0.0156
Caudate	MFI2-AS1	ENSG00000228109.1	antisense	3	0.3	0.00153	0.0208
Caudate	FYTTD1	ENSG00000122068.8	protein_coding	3	-0.121	0.00515	0.0442
Caudate	IQCG	ENSG00000114473.9	protein_coding	3	0.569	5.72e-05	0.00336
Caudate	CPLX1	ENSG00000168993.10	protein_coding	4	-0.404	0.00039	0.00927
Caudate	RP11-1398P2.1	ENSG00000244459.2	lincRNA	4	0.651	0.00346	0.0345
Caudate	SLBP	ENSG00000163950.8	protein_coding	4	-0.273	3.88e-05	0.0026
Caudate	FGFR3	ENSG00000068078.13	protein_coding	4	0.367	0.000476	0.0104
Caudate	RP11-503N18.1	ENSG00000206113.3	lincRNA	4	0.624	0.00167	0.0219
Caudate	RNF4	ENSG00000063978.11	protein_coding	4	-0.145	0.000385	0.00921
Caudate	RP11-503N18.4	ENSG00000248399.1	sense_intronic	4	1.45	4.01e-05	0.00265
Caudate	MSANTD1	ENSG00000188981.6	protein_coding	4	-0.345	0.00435	0.0398
Caudate	LRPAP1	ENSG00000163956.6	protein_coding	4	-0.328	0.00252	0.0283
Caudate	NSG1	ENSG00000168824.10	protein_coding	4	-0.556	0.000955	0.0158
Caudate	CYTL1	ENSG00000170891.6	protein_coding	4	0.68	9.44e-05	0.00429
Caudate	EVC	ENSG00000072840.8	protein_coding	4	0.297	0.00231	0.0268
Caudate	JAKMIP1	ENSG00000152969.12	protein_coding	4	-0.449	0.000448	0.00996
Caudate	MRFAP1	ENSG00000179010.10	protein_coding	4	-0.087	0.00191	0.0237
Caudate	GRPEL1	ENSG00000109519.8	protein_coding	4	-0.143	0.000202	0.00647
Caudate	ABLIM2	ENSG00000163995.14	protein_coding	4	-0.399	0.00393	0.0374
Caudate	RP11-1396O13.1	ENSG00000242034.1	pseudogene	4	1.34	7.62e-06	0.00115
Caudate	RP11-352E6.2	ENSG00000249780.1	pseudogene	4	1.28	0.000222	0.00691
Caudate	CC2D2A	ENSG00000048342.11	protein_coding	4	0.301	0.00135	0.0195
Caudate	FAM200B	ENSG00000237765.2	protein_coding	4	-0.154	0.00377	0.0365
Caudate	LDB2	ENSG00000169744.8	protein_coding	4	-0.422	0.00106	0.0168
Caudate	KCNIP4	ENSG00000185774.10	protein_coding	4	-0.417	0.00513	0.0442
Caudate	LGI2	ENSG00000153012.7	protein_coding	4	-0.494	0.00101	0.0163
Caudate	STIM2	ENSG00000109689.10	protein_coding	4	-0.176	0.00225	0.0264
Caudate	RP11-725M22.1	ENSG00000250597.1	lincRNA	4	2.09	0.000149	0.00555
Caudate	DTHD1	ENSG00000197057.4	protein_coding	4	1.46	8.06e-05	0.00394
Caudate	KLB	ENSG00000134962.6	protein_coding	4	-0.85	1.3e-05	0.00147
Caudate	RP11-539G18.2	ENSG00000255458.1	lincRNA	4	0.274	0.00494	0.0432
Caudate	UBE2K	ENSG00000078140.9	protein_coding	4	-0.19	0.000192	0.00632
Caudate	NSUN7	ENSG00000179299.12	protein_coding	4	0.951	6.39e-05	0.00351
Caudate	UCHL1	ENSG00000154277.8	protein_coding	4	-0.356	0.00607	0.0488
Caudate	TMEM33	ENSG00000109133.8	protein_coding	4	-0.112	0.00253	0.0283
Caudate	KCTD8	ENSG00000183783.6	protein_coding	4	-0.34	0.000811	0.0143
Caudate	GABRA4	ENSG00000109158.6	protein_coding	4	-0.322	0.00505	0.0438
Caudate	OCIAD1	ENSG00000109180.10	protein_coding	4	-0.203	0.000308	0.00816
Caudate	OCIAD2	ENSG00000145247.7	protein_coding	4	-0.3	0.00591	0.0479
Caudate	SPATA18	ENSG00000163071.6	protein_coding	4	1.21	1.72e-05	0.00163
Caudate	LNX1	ENSG00000072201.9	protein_coding	4	-0.539	0.000943	0.0157
Caudate	PDGFRA	ENSG00000134853.7	protein_coding	4	0.435	0.000277	0.00775
Caudate	RP11-231C18.1	ENSG00000248184.1	lincRNA	4	0.472	0.00264	0.0289
Caudate	KIT	ENSG00000157404.11	protein_coding	4	-0.573	0.00015	0.00555
Caudate	NOA1	ENSG00000084092.6	protein_coding	4	-0.137	0.00107	0.0169
Caudate	POLR2B	ENSG00000047315.10	protein_coding	4	-0.113	0.00617	0.0493
Caudate	IGFBP7-AS1	ENSG00000245067.2	antisense	4	1.26	0.000384	0.0092
Caudate	EPHA5	ENSG00000145242.9	protein_coding	4	-0.414	0.00514	0.0442
Caudate	AMBN	ENSG00000178522.10	protein_coding	4	-0.818	0.00625	0.0498
Caudate	UTP3	ENSG00000132467.2	protein_coding	4	-0.148	0.00112	0.0174
Caudate	DCK	ENSG00000156136.5	protein_coding	4	-0.249	0.00127	0.0189
Caudate	ADAMTS3	ENSG00000156140.4	protein_coding	4	-0.501	0.000255	0.0074
Caudate	BTC	ENSG00000174808.7	protein_coding	4	0.889	0.000197	0.00638
Caudate	PARM1	ENSG00000169116.7	protein_coding	4	-0.572	1.98e-05	0.00177
Caudate	G3BP2	ENSG00000138757.10	protein_coding	4	-0.329	2.12e-05	0.00184
Caudate	USO1	ENSG00000138768.10	protein_coding	4	-0.133	0.00157	0.0211
Caudate	SDAD1	ENSG00000198301.7	protein_coding	4	-0.132	0.00623	0.0497
Caudate	FAM47E	ENSG00000189157.9	protein_coding	4	0.256	0.00422	0.039
Caudate	SHROOM3	ENSG00000138771.10	protein_coding	4	0.416	0.00334	0.0337
Caudate	RP11-777B9.5	ENSG00000249072.1	pseudogene	4	0.922	0.00158	0.0212
Caudate	RP11-792D21.2	ENSG00000251442.1	lincRNA	4	0.573	0.000124	0.00497
Caudate	PAQR3	ENSG00000163291.10	protein_coding	4	-0.349	9.35e-06	0.00124
Caudate	LINC01088	ENSG00000249307.1	antisense	4	1.01	0.000205	0.00654
Caudate	C4orf22	ENSG00000197826.7	protein_coding	4	2.21	0.000256	0.00741
Caudate	RASGEF1B	ENSG00000138670.12	protein_coding	4	-0.301	0.00177	0.0226
Caudate	SEC31A	ENSG00000138674.12	protein_coding	4	-0.0804	0.00393	0.0374
Caudate	COPS4	ENSG00000138663.4	protein_coding	4	-0.158	0.000145	0.00547
Caudate	HERC3	ENSG00000138641.11	protein_coding	4	-0.347	0.000114	0.00477
Caudate	NAP1L5	ENSG00000177432.6	protein_coding	4	-0.301	0.00168	0.0219
Caudate	GPRIN3	ENSG00000185477.4	protein_coding	4	-0.498	7.12e-05	0.00371
Caudate	RAP1GDS1	ENSG00000138698.10	protein_coding	4	-0.308	1.11e-05	0.00136
Caudate	TSPAN5	ENSG00000168785.3	protein_coding	4	-0.0795	0.00436	0.0399
Caudate	EIF4E	ENSG00000151247.8	protein_coding	4	-0.139	0.00476	0.0421
Caudate	ADH5	ENSG00000197894.6	protein_coding	4	0.138	0.00387	0.037
Caudate	RP11-696N14.1	ENSG00000246090.2	antisense	4	0.403	0.00416	0.0387
Caudate	MTTP	ENSG00000138823.8	protein_coding	4	0.492	0.00336	0.0338
Caudate	RP11-766F14.2	ENSG00000248713.1	protein_coding	4	-0.878	8.01e-05	0.00394
Caudate	DNAJB14	ENSG00000164031.12	protein_coding	4	-0.196	0.00145	0.0202
Caudate	H2AFZ	ENSG00000164032.7	protein_coding	4	-0.308	1.34e-05	0.00149
Caudate	DDIT4L	ENSG00000145358.2	protein_coding	4	-0.521	4.29e-06	0.00084
Caudate	RP11-588P8.1	ENSG00000249710.1	antisense	4	-0.733	0.00463	0.0413
Caudate	PPP3CA	ENSG00000138814.12	protein_coding	4	-0.44	0.000478	0.0104
Caudate	CISD2	ENSG00000145354.5	protein_coding	4	-0.145	0.00161	0.0215
Caudate	SLC9B2	ENSG00000164038.10	protein_coding	4	-0.259	2.8e-05	0.00215
Caudate	CENPE	ENSG00000138778.7	protein_coding	4	-0.316	0.00527	0.0449
Caudate	PAPSS1	ENSG00000138801.4	protein_coding	4	-0.128	0.00248	0.0281
Caudate	LEF1-AS1	ENSG00000232021.2	processed_transcript	4	0.615	0.0026	0.0288
Caudate	COL25A1	ENSG00000188517.10	protein_coding	4	-0.798	5.13e-05	0.00314
Caudate	ELOVL6	ENSG00000170522.5	protein_coding	4	-0.166	0.000485	0.0105
Caudate	AP1AR	ENSG00000138660.7	protein_coding	4	-0.323	8.02e-05	0.00394
Caudate	ANK2	ENSG00000145362.12	protein_coding	4	-0.157	0.0057	0.0469
Caudate	NDST3	ENSG00000164100.7	protein_coding	4	-0.502	0.0024	0.0274
Caudate	PRDM5	ENSG00000138738.6	protein_coding	4	0.242	0.00292	0.0309
Caudate	HSPA4L	ENSG00000164070.7	protein_coding	4	-0.531	0.000576	0.0116
Caudate	RP11-420A23.1	ENSG00000251432.2	lincRNA	4	0.441	2.58e-05	0.00206
Caudate	SCOC	ENSG00000153130.13	protein_coding	4	-0.201	0.00187	0.0234
Caudate	TBC1D9	ENSG00000109436.7	protein_coding	4	-0.292	0.000413	0.00957
Caudate	RNF150	ENSG00000170153.6	protein_coding	4	-0.373	0.00121	0.0183
Caudate	ABCE1	ENSG00000164163.6	protein_coding	4	-0.159	0.00385	0.0369
Caudate	OTUD4	ENSG00000164164.11	protein_coding	4	-0.193	0.000692	0.013
Caudate	TTC29	ENSG00000137473.13	protein_coding	4	1.47	2.09e-05	0.00183
Caudate	FHDC1	ENSG00000137460.4	protein_coding	4	-0.37	0.00238	0.0273
Caudate	RNF175	ENSG00000145428.10	protein_coding	4	-0.346	0.00307	0.0318
Caudate	SFRP2	ENSG00000145423.4	protein_coding	4	0.726	0.00221	0.0261
Caudate	LRAT	ENSG00000121207.7	protein_coding	4	0.655	0.000101	0.00446
Caudate	GUCY1A3	ENSG00000164116.12	protein_coding	4	-0.461	0.000881	0.015
Caudate	GUCY1B3	ENSG00000061918.8	protein_coding	4	-0.49	7.21e-05	0.00373
Caudate	GLRB	ENSG00000109738.6	protein_coding	4	-0.363	0.000182	0.0062
Caudate	NPY5R	ENSG00000164129.7	protein_coding	4	-0.538	0.00263	0.0289
Caudate	RP11-218F10.3	ENSG00000273449.1	lincRNA	4	0.455	0.00174	0.0224
Caudate	KLHL2	ENSG00000109466.9	protein_coding	4	-0.203	0.00222	0.0262
Caudate	NEK1	ENSG00000137601.11	protein_coding	4	0.172	0.00572	0.0469
Caudate	SPATA4	ENSG00000150628.2	protein_coding	4	0.561	0.000515	0.0109
Caudate	SPCS3	ENSG00000129128.8	protein_coding	4	-0.173	3.17e-05	0.00229
Caudate	RP11-665C14.2	ENSG00000249460.1	lincRNA	4	-0.748	0.00198	0.0243
Caudate	TRAPPC11	ENSG00000168538.11	protein_coding	4	-0.133	0.00538	0.0456
Caudate	SLC25A4	ENSG00000151729.6	protein_coding	4	-0.378	1.67e-06	0.000528
Caudate	SNX25	ENSG00000109762.11	protein_coding	4	-0.226	0.00147	0.0203
Caudate	C4orf47	ENSG00000205129.4	protein_coding	4	0.36	0.00407	0.0382
Caudate	PDLIM3	ENSG00000154553.9	protein_coding	4	0.323	0.000426	0.00971
Caudate	SORBS2	ENSG00000154556.13	protein_coding	4	-0.366	0.00123	0.0184
Caudate	LRRC14B	ENSG00000185028.3	protein_coding	5	-0.763	0.000477	0.0104
Caudate	CTD-2083E4.7	ENSG00000261434.1	sense_overlapping	5	-0.453	0.0034	0.0341
Caudate	CTD-2083E4.6	ENSG00000248925.1	antisense	5	0.503	0.00116	0.0178
Caudate	CLPTM1L	ENSG00000049656.9	protein_coding	5	-0.131	0.000187	0.00624
Caudate	RP11-43F13.1	ENSG00000188002.6	pseudogene	5	0.335	0.00153	0.0207
Caudate	IRX1	ENSG00000170549.3	protein_coding	5	0.627	0.000279	0.00776
Caudate	LINC01018	ENSG00000250056.1	lincRNA	5	0.325	0.0013	0.0191
Caudate	SRD5A1	ENSG00000145545.7	protein_coding	5	-0.34	0.000424	0.00968
Caudate	C5orf49	ENSG00000215217.2	protein_coding	5	0.631	6.61e-05	0.00356
Caudate	TAS2R1	ENSG00000169777.5	protein_coding	5	-0.713	0.006	0.0483
Caudate	CCT5	ENSG00000150753.7	protein_coding	5	-0.303	0.000118	0.00485
Caudate	ROPN1L	ENSG00000145491.7	protein_coding	5	1.19	0.000185	0.00622
Caudate	RP11-1C1.7	ENSG00000246016.2	antisense	5	1.33	0.000416	0.00961
Caudate	ANKRD33B	ENSG00000164236.7	protein_coding	5	-0.472	0.00373	0.0362
Caudate	RP11-54F2.1	ENSG00000251196.1	pseudogene	5	-0.476	0.00168	0.0219
Caudate	RP11-215G15.5	ENSG00000272016.1	lincRNA	5	-0.468	3.76e-05	0.00257
Caudate	DNAH5	ENSG00000039139.9	protein_coding	5	0.866	0.000209	0.00664
Caudate	ANKH	ENSG00000154122.8	protein_coding	5	-0.168	0.000101	0.00446
Caudate	RP11-19O2.2	ENSG00000250448.1	antisense	5	-0.845	0.00248	0.0281
Caudate	ZNF622	ENSG00000173545.4	protein_coding	5	-0.154	0.000185	0.00622
Caudate	FAM134B	ENSG00000154153.9	protein_coding	5	-0.288	0.0034	0.0341
Caudate	MYO10	ENSG00000145555.10	protein_coding	5	0.256	0.00288	0.0306
Caudate	C5orf22	ENSG00000082213.13	protein_coding	5	-0.248	0.000249	0.00736
Caudate	PDZD2	ENSG00000133401.11	protein_coding	5	-0.255	0.00542	0.0457
Caudate	CTD-2290C23.1	ENSG00000224282.3	pseudogene	5	0.943	0.00223	0.0262
Caudate	SUB1	ENSG00000113387.7	protein_coding	5	-0.25	0.000252	0.00739
Caudate	RXFP3	ENSG00000182631.5	protein_coding	5	-1.14	0.00101	0.0163
Caudate	RAD1	ENSG00000113456.14	protein_coding	5	-0.185	0.00231	0.0268
Caudate	SPEF2	ENSG00000152582.8	protein_coding	5	0.377	0.00147	0.0204
Caudate	NADK2	ENSG00000152620.8	protein_coding	5	0.226	0.00243	0.0276
Caudate	CTD-2196P11.2	ENSG00000251189.1	lincRNA	5	-0.927	0.000139	0.00533
Caudate	OXCT1	ENSG00000083720.8	protein_coding	5	-0.236	0.00258	0.0287
Caudate	CTD-2035E11.5	ENSG00000272144.1	lincRNA	5	0.711	0.000335	0.00849
Caudate	RP11-159F24.6	ENSG00000248554.1	antisense	5	0.488	0.00471	0.0418
Caudate	RP11-159F24.5	ENSG00000248240.1	antisense	5	0.538	0.00324	0.033
Caudate	MRPS30	ENSG00000112996.5	protein_coding	5	-0.213	1.35e-05	0.0015
Caudate	HCN1	ENSG00000164588.4	protein_coding	5	-0.625	0.00188	0.0235
Caudate	PELO	ENSG00000152684.10	protein_coding	5	-0.154	0.000895	0.0152
Caudate	MOCS2	ENSG00000164172.14	protein_coding	5	-0.135	0.00513	0.0442
Caudate	NDUFS4	ENSG00000164258.7	protein_coding	5	-0.137	0.00265	0.029
Caudate	PLK2	ENSG00000145632.10	protein_coding	5	-0.452	0.00128	0.0189
Caudate	RAB3C	ENSG00000152932.6	protein_coding	5	-0.573	0.00061	0.0119
Caudate	HTR1A	ENSG00000178394.3	protein_coding	5	-1.29	8.47e-05	0.00402
Caudate	RGS7BP	ENSG00000186479.4	protein_coding	5	-0.997	5.4e-07	0.00036
Caudate	TRIM23	ENSG00000113595.10	protein_coding	5	-0.188	0.00311	0.0321
Caudate	SGTB	ENSG00000197860.5	protein_coding	5	-0.46	3.26e-05	0.00233
Caudate	CCNB1	ENSG00000134057.10	protein_coding	5	-0.232	0.00278	0.0299
Caudate	TAF9	ENSG00000085231.9	protein_coding	5	-0.187	0.000766	0.0138
Caudate	CTC-347C20.2	ENSG00000248371.1	lincRNA	5	1.02	5.64e-05	0.00336
Caudate	ENC1	ENSG00000171617.9	protein_coding	5	-0.57	0.00139	0.0198
Caudate	GFM2	ENSG00000164347.13	protein_coding	5	-0.208	9.48e-05	0.0043
Caudate	HMGCR	ENSG00000113161.11	protein_coding	5	-0.24	0.00508	0.0439
Caudate	COL4A3BP	ENSG00000113163.11	protein_coding	5	-0.182	0.00094	0.0157
Caudate	ANKDD1B	ENSG00000189045.9	protein_coding	5	0.446	0.00034	0.00854
Caudate	SV2C	ENSG00000122012.9	protein_coding	5	-0.738	0.000132	0.00515
Caudate	IQGAP2	ENSG00000145703.11	protein_coding	5	0.811	0.000283	0.0078
Caudate	PDE8B	ENSG00000113231.9	protein_coding	5	-0.323	0.000111	0.00473
Caudate	WDR41	ENSG00000164253.8	protein_coding	5	-0.114	0.0032	0.0328
Caudate	SCAMP1	ENSG00000085365.13	protein_coding	5	-0.226	0.00132	0.0193
Caudate	HOMER1	ENSG00000152413.10	protein_coding	5	-0.532	0.000113	0.00476
Caudate	CMYA5	ENSG00000164309.10	protein_coding	5	0.269	0.00222	0.0262
Caudate	RP11-168A11.4	ENSG00000251050.1	pseudogene	5	0.399	0.00242	0.0276
Caudate	FAM151B	ENSG00000152380.5	protein_coding	5	0.326	0.00134	0.0195
Caudate	ANKRD34B	ENSG00000189127.3	protein_coding	5	-0.758	6.18e-05	0.00345
Caudate	RASGRF2	ENSG00000113319.7	protein_coding	5	-0.417	0.000982	0.016
Caudate	GPR98	ENSG00000164199.11	protein_coding	5	0.35	0.00514	0.0442
Caudate	NR2F1-AS1	ENSG00000237187.4	processed_transcript	5	0.19	0.00478	0.0421
Caudate	MCTP1	ENSG00000175471.15	protein_coding	5	-0.664	2.02e-05	0.00179
Caudate	FAM81B	ENSG00000153347.5	protein_coding	5	2.06	1.7e-06	0.000528
Caudate	PCSK1	ENSG00000175426.6	protein_coding	5	-0.905	2.42e-05	0.002
Caudate	RGMB	ENSG00000174136.7	protein_coding	5	-0.212	0.00489	0.0429
Caudate	RP11-475J5.5	ENSG00000271207.1	pseudogene	5	1.38	4.47e-07	0.00036
Caudate	PAM	ENSG00000145730.16	protein_coding	5	-0.382	0.000102	0.00449
Caudate	LINC01023	ENSG00000272523.1	lincRNA	5	0.386	0.000185	0.00622
Caudate	PJA2	ENSG00000198961.5	protein_coding	5	-0.309	1.48e-05	0.00152
Caudate	TMEM232	ENSG00000186952.10	protein_coding	5	0.543	0.000819	0.0144
Caudate	SLC25A46	ENSG00000164209.12	protein_coding	5	-0.157	0.00539	0.0456
Caudate	CAMK4	ENSG00000152495.6	protein_coding	5	-0.492	0.000926	0.0155
Caudate	STARD4	ENSG00000164211.8	protein_coding	5	-0.339	0.000469	0.0103
Caudate	SRP19	ENSG00000153037.8	protein_coding	5	-0.203	0.000453	0.0101
Caudate	REEP5	ENSG00000129625.8	protein_coding	5	-0.258	0.000361	0.00886
Caudate	YTHDC2	ENSG00000047188.11	protein_coding	5	-0.178	0.00444	0.0403
Caudate	ATG12	ENSG00000145782.8	protein_coding	5	-0.113	0.00214	0.0254
Caudate	PRR16	ENSG00000184838.10	protein_coding	5	-0.336	0.00523	0.0448
Caudate	CTC-441N14.2	ENSG00000247311.2	antisense	5	1.97	0.00014	0.00536
Caudate	ZNF474	ENSG00000164185.4	protein_coding	5	0.817	0.00208	0.0251
Caudate	CTD-2544H17.1	ENSG00000249621.1	lincRNA	5	1.92	4.06e-06	0.000831
Caudate	PRDM6	ENSG00000061455.10	protein_coding	5	0.276	0.0036	0.0354
Caudate	SLC27A6	ENSG00000113396.8	protein_coding	5	1.04	0.00137	0.0196
Caudate	ISOC1	ENSG00000066583.7	protein_coding	5	-0.116	0.0054	0.0456
Caudate	CHSY3	ENSG00000198108.3	protein_coding	5	-0.37	0.00328	0.0333
Caudate	HINT1	ENSG00000169567.7	protein_coding	5	-0.189	0.00104	0.0166
Caudate	AC034228.3	ENSG00000223548.1	antisense	5	0.476	0.00518	0.0445
Caudate	VDAC1	ENSG00000213585.6	protein_coding	5	-0.349	9.31e-07	0.000476
Caudate	CTB-113I20.2	ENSG00000271737.1	lincRNA	5	0.34	0.00338	0.0339
Caudate	SKP1	ENSG00000113558.14	protein_coding	5	-0.0997	0.00351	0.0347
Caudate	PPP2CA	ENSG00000113575.5	protein_coding	5	-0.225	8.55e-06	0.00122
Caudate	UBE2B	ENSG00000119048.3	protein_coding	5	-0.203	0.000608	0.0119
Caudate	CDKN2AIPNL	ENSG00000237190.3	protein_coding	5	-0.216	0.000855	0.0148
Caudate	C5orf24	ENSG00000181904.8	protein_coding	5	-0.172	0.00203	0.0247
Caudate	TXNDC15	ENSG00000113621.10	protein_coding	5	-0.153	0.000183	0.00622
Caudate	CTB-36O1.7	ENSG00000244921.2	pseudogene	5	1.32	1.45e-06	0.000511
Caudate	MTND6P4	ENSG00000249119.1	pseudogene	5	0.78	0.000124	0.00497
Caudate	MTND5P11	ENSG00000248923.1	pseudogene	5	0.566	0.00416	0.0387
Caudate	H2AFY	ENSG00000113648.12	protein_coding	5	-0.0781	0.00386	0.0369
Caudate	LECT2	ENSG00000145826.4	protein_coding	5	-0.844	0.00329	0.0334
Caudate	FBXL21	ENSG00000164616.10	polymorphic_pseudogene	5	-0.809	0.000551	0.0113
Caudate	SPOCK1	ENSG00000152377.8	protein_coding	5	-0.329	0.00145	0.0202
Caudate	RP11-381K20.5	ENSG00000270237.1	lincRNA	5	0.371	0.00406	0.0382
Caudate	HNRNPA0	ENSG00000177733.4	protein_coding	5	-0.122	0.00114	0.0175
Caudate	LRRTM2	ENSG00000146006.7	protein_coding	5	-0.385	0.00049	0.0106
Caudate	MATR3	ENSG00000015479.13	protein_coding	5	-0.182	0.000189	0.00628
Caudate	SLC23A1	ENSG00000170482.12	protein_coding	5	0.705	0.00148	0.0204
Caudate	PROB1	ENSG00000228672.2	protein_coding	5	0.456	0.000726	0.0134
Caudate	SPATA24	ENSG00000170469.6	protein_coding	5	0.34	0.000368	0.00896
Caudate	UBE2D2	ENSG00000131508.11	protein_coding	5	-0.139	7e-07	0.000419
Caudate	EIF4EBP3	ENSG00000243056.1	protein_coding	5	0.315	6.44e-05	0.00351
Caudate	ZMAT2	ENSG00000146007.6	protein_coding	5	-0.255	0.00157	0.0211
Caudate	PCDHAC2	ENSG00000243232.3	protein_coding	5	-0.534	0.000792	0.0141
Caudate	PCDHB3	ENSG00000113205.2	protein_coding	5	-0.356	0.00262	0.0289
Caudate	TAF7	ENSG00000178913.5	protein_coding	5	-0.125	0.00512	0.0441
Caudate	PCDHGA11	ENSG00000253873.1	protein_coding	5	0.382	0.00484	0.0426
Caudate	PCDHGC5	ENSG00000240764.2	protein_coding	5	-0.683	0.00035	0.00869
Caudate	RELL2	ENSG00000164620.4	protein_coding	5	-0.399	0.00265	0.029
Caudate	PCDH1	ENSG00000156453.9	protein_coding	5	-0.214	0.00465	0.0415
Caudate	RNF14	ENSG00000013561.13	protein_coding	5	-0.108	0.00299	0.0314
Caudate	NDFIP1	ENSG00000131507.9	protein_coding	5	-0.259	3.87e-05	0.0026
Caudate	ARHGAP26	ENSG00000145819.11	protein_coding	5	-0.211	0.00246	0.0278
Caudate	KCTD16	ENSG00000183775.6	protein_coding	5	-0.481	0.000102	0.00446
Caudate	PPP2R2B	ENSG00000156475.14	protein_coding	5	-0.223	0.00158	0.0211
Caudate	HTR4	ENSG00000164270.13	protein_coding	5	-0.735	0.00162	0.0215
Caudate	GRPEL2	ENSG00000164284.10	protein_coding	5	-0.239	0.00131	0.0192
Caudate	ANXA6	ENSG00000197043.9	protein_coding	5	-0.284	0.000531	0.011
Caudate	CYFIP2	ENSG00000055163.14	protein_coding	5	-0.263	0.0022	0.026
Caudate	CLINT1	ENSG00000113282.9	protein_coding	5	-0.125	0.00442	0.0402
Caudate	RNF145	ENSG00000145860.7	protein_coding	5	-0.238	9.12e-06	0.00124
Caudate	CTB-127C13.1	ENSG00000247699.2	antisense	5	2.91	5.56e-08	0.000136
Caudate	GABRB2	ENSG00000145864.8	protein_coding	5	-0.648	0.000158	0.00569
Caudate	GABRA1	ENSG00000022355.10	protein_coding	5	-0.585	0.00243	0.0277
Caudate	GABRG2	ENSG00000113327.10	protein_coding	5	-0.759	0.000173	0.00603
Caudate	PANK3	ENSG00000120137.6	protein_coding	5	-0.161	0.00149	0.0205
Caudate	UBTD2	ENSG00000168246.5	protein_coding	5	-0.149	0.00589	0.0478
Caudate	CTB-43E15.4	ENSG00000254211.1	lincRNA	5	0.368	0.00464	0.0414
Caudate	DRD1	ENSG00000184845.3	protein_coding	5	-0.445	0.00379	0.0366
Caudate	HRH2	ENSG00000113749.5	protein_coding	5	-0.578	0.000625	0.0121
Caudate	NOP16	ENSG00000048162.15	protein_coding	5	-0.261	0.000562	0.0114
Caudate	RGS14	ENSG00000169220.13	protein_coding	5	-0.576	0.000482	0.0105
Caudate	DBN1	ENSG00000113758.9	protein_coding	5	-0.225	0.00628	0.0499
Caudate	N4BP3	ENSG00000145911.5	protein_coding	5	-0.503	2.32e-05	0.00194
Caudate	NHP2	ENSG00000145912.4	protein_coding	5	-0.192	0.000338	0.00851
Caudate	ZFP2	ENSG00000198939.3	protein_coding	5	0.25	8.86e-05	0.00416
Caudate	MAPK9	ENSG00000050748.13	protein_coding	5	-0.307	0.00133	0.0194
Caudate	CTB-129O4.1	ENSG00000248367.1	antisense	5	0.339	0.000509	0.0108
Caudate	GMDS	ENSG00000112699.6	protein_coding	6	-0.196	0.00166	0.0218
Caudate	RP11-506K6.4	ENSG00000272320.1	antisense	6	0.301	0.00189	0.0236
Caudate	FAM50B	ENSG00000145945.5	protein_coding	6	-0.203	0.00425	0.0392
Caudate	PPP1R3G	ENSG00000219607.2	protein_coding	6	0.318	0.00415	0.0386
Caudate	RREB1	ENSG00000124782.15	protein_coding	6	0.312	0.00345	0.0344
Caudate	RP11-69L16.5	ENSG00000220472.1	pseudogene	6	0.593	0.00458	0.041
Caudate	C6orf52	ENSG00000137434.7	protein_coding	6	0.511	0.000507	0.0108
Caudate	PAK1IP1	ENSG00000111845.4	protein_coding	6	-0.171	0.000242	0.00732
Caudate	TMEM14C	ENSG00000111843.9	protein_coding	6	0.128	0.00593	0.048
Caudate	MAK	ENSG00000111837.7	protein_coding	6	0.79	0.000936	0.0156
Caudate	SMIM13	ENSG00000224531.4	protein_coding	6	-0.207	0.000745	0.0135
Caudate	PHACTR1	ENSG00000112137.12	protein_coding	6	-0.455	0.00163	0.0216
Caudate	GFOD1	ENSG00000145990.6	protein_coding	6	-0.329	0.000102	0.00446
Caudate	SIRT5	ENSG00000124523.10	protein_coding	6	-0.141	0.00243	0.0277
Caudate	RANBP9	ENSG00000010017.9	protein_coding	6	-0.134	0.000245	0.00733
Caudate	GMPR	ENSG00000137198.5	protein_coding	6	0.561	0.000787	0.014
Caudate	STMND1	ENSG00000230873.4	protein_coding	6	0.942	0.000648	0.0124
Caudate	CAP2	ENSG00000112186.7	protein_coding	6	-0.537	0.000219	0.00688
Caudate	RP4-625H18.2	ENSG00000228412.2	lincRNA	6	0.676	0.0035	0.0347
Caudate	RP11-204E9.1	ENSG00000231754.1	lincRNA	6	-0.887	0.000504	0.0107
Caudate	DCDC2	ENSG00000146038.7	protein_coding	6	0.927	7.55e-05	0.00381
Caudate	RP3-369A17.4	ENSG00000224164.1	lincRNA	6	0.828	0.00237	0.0272
Caudate	SCGN	ENSG00000079689.9	protein_coding	6	1.45	0.00347	0.0345
Caudate	HFE	ENSG00000010704.14	protein_coding	6	0.283	0.00344	0.0344
Caudate	HIST1H2BG	ENSG00000187990.4	protein_coding	6	0.802	0.0019	0.0237
Caudate	HIST1H2AE	ENSG00000168274.3	protein_coding	6	0.88	0.00049	0.0105
Caudate	HIST1H1D	ENSG00000124575.5	protein_coding	6	1.7	0.00337	0.0339
Caudate	HMGN4	ENSG00000182952.4	protein_coding	6	-0.161	0.00028	0.00776
Caudate	HIST1H3H	ENSG00000203813.4	protein_coding	6	1.02	0.00629	0.0499
Caudate	TOB2P1	ENSG00000176933.4	pseudogene	6	0.732	0.00357	0.0351
Caudate	XXbac-BPG308J9.3	ENSG00000232505.2	lincRNA	6	2.84	3.98e-05	0.00265
Caudate	OR2B4P	ENSG00000197171.5	pseudogene	6	2.78	1.89e-05	0.00172
Caudate	OR12D2	ENSG00000168787.4	protein_coding	6	2.26	0.0018	0.0229
Caudate	OR2H1	ENSG00000204688.5	protein_coding	6	1.43	0.00294	0.0311
Caudate	NRM	ENSG00000137404.10	protein_coding	6	0.308	0.00112	0.0173
Caudate	ABHD16A	ENSG00000204427.7	protein_coding	6	-0.171	0.00113	0.0175
Caudate	MSH5	ENSG00000204410.10	protein_coding	6	0.227	0.00432	0.0396
Caudate	HCG23	ENSG00000228962.1	antisense	6	0.332	0.00458	0.041
Caudate	HLA-DRA	ENSG00000204287.9	protein_coding	6	0.558	0.00225	0.0264
Caudate	HLA-DMB	ENSG00000242574.4	protein_coding	6	0.583	0.000917	0.0154
Caudate	HLA-DMA	ENSG00000204257.10	protein_coding	6	0.416	0.00368	0.0359
Caudate	HLA-DPA1	ENSG00000231389.3	protein_coding	6	0.489	0.00506	0.0439
Caudate	HMGA1	ENSG00000137309.15	protein_coding	6	-0.344	8.23e-05	0.00397
Caudate	SCUBE3	ENSG00000146197.7	protein_coding	6	0.401	0.000171	0.00596
Caudate	LHFPL5	ENSG00000197753.6	protein_coding	6	-0.541	0.00214	0.0254
Caudate	SRPK1	ENSG00000096063.10	protein_coding	6	-0.207	0.000275	0.00771
Caudate	MAPK13	ENSG00000156711.12	protein_coding	6	-0.438	6.32e-05	0.00349
Caudate	PPIL1	ENSG00000137168.7	protein_coding	6	-0.205	1.53e-05	0.00154
Caudate	MTCH1	ENSG00000137409.14	protein_coding	6	-0.23	0.000299	0.00801
Caudate	RNF8	ENSG00000112130.12	protein_coding	6	-0.14	0.000302	0.00807
Caudate	GLO1	ENSG00000124767.6	protein_coding	6	-0.102	0.00541	0.0457
Caudate	GLP1R	ENSG00000112164.5	protein_coding	6	-0.852	0.000375	0.00908
Caudate	KIF6	ENSG00000164627.13	protein_coding	6	0.337	0.00127	0.0189
Caudate	BYSL	ENSG00000112578.5	protein_coding	6	-0.259	0.000203	0.0065
Caudate	MRPS10	ENSG00000048544.5	protein_coding	6	-0.118	0.00582	0.0475
Caudate	CNPY3	ENSG00000137161.12	protein_coding	6	0.206	0.00208	0.0251
Caudate	GNMT	ENSG00000124713.5	protein_coding	6	0.385	9.73e-05	0.00436
Caudate	PPP2R5D	ENSG00000112640.10	protein_coding	6	-0.288	0.000337	0.00851
Caudate	PTK7	ENSG00000112655.11	protein_coding	6	0.26	0.00366	0.0358
Caudate	CRIP3	ENSG00000146215.9	protein_coding	6	0.297	0.00192	0.0237
Caudate	RSPH9	ENSG00000172426.11	protein_coding	6	0.81	8.98e-05	0.00418
Caudate	MRPS18A	ENSG00000096080.7	protein_coding	6	-0.154	0.00261	0.0288
Caudate	HSP90AB1	ENSG00000096384.15	protein_coding	6	-0.303	0.00163	0.0216
Caudate	SPATS1	ENSG00000249481.2	protein_coding	6	1.69	2.08e-06	0.000598
Caudate	ENPP5	ENSG00000112796.5	protein_coding	6	-0.245	0.0048	0.0423
Caudate	RCAN2	ENSG00000172348.10	protein_coding	6	-0.571	1.48e-05	0.00152
Caudate	ANKRD66	ENSG00000230062.4	protein_coding	6	1.85	6.44e-05	0.00351
Caudate	RP11-268F1.3	ENSG00000236164.1	lincRNA	6	1.87	0.00018	0.00617
Caudate	EFHC1	ENSG00000096093.10	protein_coding	6	0.331	0.00471	0.0418
Caudate	TRAM2-AS1	ENSG00000225791.2	lincRNA	6	0.172	0.00483	0.0426
Caudate	TMEM14A	ENSG00000096092.5	protein_coding	6	-0.182	0.00506	0.0439
Caudate	LGSN	ENSG00000146166.12	protein_coding	6	-1.1	0.000709	0.0132
Caudate	COL19A1	ENSG00000082293.8	protein_coding	6	-0.797	0.000596	0.0118
Caudate	COL9A1	ENSG00000112280.11	protein_coding	6	0.33	0.0046	0.0412
Caudate	RIMS1	ENSG00000079841.14	protein_coding	6	-0.471	0.000548	0.0113
Caudate	KCNQ5	ENSG00000185760.11	protein_coding	6	-0.659	0.000405	0.00945
Caudate	RP11-553A21.3	ENSG00000231652.2	antisense	6	0.524	0.00137	0.0197
Caudate	COX7A2	ENSG00000112695.7	protein_coding	6	-0.189	0.00161	0.0215
Caudate	TMEM30A	ENSG00000112697.11	protein_coding	6	-0.156	0.00152	0.0207
Caudate	ELOVL4	ENSG00000118402.5	protein_coding	6	-0.456	0.000223	0.00693
Caudate	TPBG	ENSG00000146242.5	protein_coding	6	-0.826	1.36e-06	0.000501
Caudate	SNAP91	ENSG00000065609.10	protein_coding	6	-0.387	0.00125	0.0187
Caudate	RP11-393I2.4	ENSG00000272008.1	antisense	6	0.319	0.00142	0.02
Caudate	C6orf163	ENSG00000203872.6	protein_coding	6	0.438	0.000633	0.0122
Caudate	C6ORF165	ENSG00000272514.1	protein_coding	6	0.887	3.37e-05	0.00237
Caudate	AKIRIN2	ENSG00000135334.8	protein_coding	6	-0.301	2.03e-08	7.88e-05
Caudate	CNR1	ENSG00000118432.11	protein_coding	6	-0.69	0.000101	0.00446
Caudate	SRSF12	ENSG00000154548.8	protein_coding	6	-0.239	0.00191	0.0237
Caudate	EPHA7	ENSG00000135333.9	protein_coding	6	-0.497	0.000235	0.00717
Caudate	GPR63	ENSG00000112218.7	protein_coding	6	-0.416	0.000677	0.0128
Caudate	NDUFAF4	ENSG00000123545.5	protein_coding	6	-0.309	0.000163	0.00577
Caudate	FAXC	ENSG00000146267.11	protein_coding	6	-0.41	0.000389	0.00927
Caudate	CCNC	ENSG00000112237.8	protein_coding	6	-0.169	0.000633	0.0122
Caudate	MCHR2	ENSG00000152034.6	protein_coding	6	-1.25	6.73e-05	0.00359
Caudate	HACE1	ENSG00000085382.7	protein_coding	6	-0.279	0.000105	0.00456
Caudate	PREP	ENSG00000085377.9	protein_coding	6	-0.128	0.00086	0.0148
Caudate	ATG5	ENSG00000057663.8	protein_coding	6	-0.106	0.00524	0.0448
Caudate	OSTM1	ENSG00000081087.10	protein_coding	6	-0.137	0.000771	0.0138
Caudate	C6orf183	ENSG00000243587.6	polymorphic_pseudogene	6	0.996	0.0018	0.0229
Caudate	CCDC162P	ENSG00000203799.6	pseudogene	6	1.11	2.15e-05	0.00186
Caudate	ZBTB24	ENSG00000112365.4	protein_coding	6	-0.199	0.00142	0.02
Caudate	GPR6	ENSG00000146360.7	protein_coding	6	-0.689	0.000554	0.0113
Caudate	WASF1	ENSG00000112290.8	protein_coding	6	-0.457	0.00176	0.0225
Caudate	CDC40	ENSG00000168438.10	protein_coding	6	-0.371	0.000213	0.00672
Caudate	SLC16A10	ENSG00000112394.12	protein_coding	6	-0.369	0.00211	0.0252
Caudate	MARCKS	ENSG00000155130.5	protein_coding	6	0.231	0.000248	0.00736
Caudate	HDAC2	ENSG00000196591.7	protein_coding	6	-0.154	0.000806	0.0142
Caudate	HS3ST5	ENSG00000249853.3	protein_coding	6	-0.453	0.000306	0.00814
Caudate	TSPYL4	ENSG00000187189.9	protein_coding	6	-0.313	0.000171	0.00597
Caudate	TSPYL1	ENSG00000189241.6	protein_coding	6	-0.3	0.00203	0.0247
Caudate	RSPH4A	ENSG00000111834.8	protein_coding	6	0.753	0.00212	0.0253
Caudate	NUS1	ENSG00000153989.7	protein_coding	6	-0.165	0.000347	0.00867
Caudate	MAN1A1	ENSG00000111885.5	protein_coding	6	-0.338	0.00332	0.0336
Caudate	FABP7	ENSG00000164434.7	protein_coding	6	0.547	1.75e-05	0.00165
Caudate	TRDN	ENSG00000186439.8	protein_coding	6	1.24	6.43e-08	0.000136
Caudate	TPD52L1	ENSG00000111907.16	protein_coding	6	-0.231	0.00435	0.0397
Caudate	HDDC2	ENSG00000111906.13	protein_coding	6	0.119	0.00494	0.0432
Caudate	RP11-735G4.1	ENSG00000226409.1	antisense	6	-0.707	0.000467	0.0103
Caudate	RP11-138M12.1	ENSG00000228704.1	lincRNA	6	-0.759	0.00129	0.019
Caudate	NCOA7	ENSG00000111912.14	protein_coding	6	-0.357	0.000154	0.00561
Caudate	KIAA0408	ENSG00000189367.10	protein_coding	6	-0.279	0.00107	0.0168
Caudate	ENPP3	ENSG00000154269.10	protein_coding	6	0.496	7.05e-05	0.0037
Caudate	ENPP1	ENSG00000197594.7	protein_coding	6	0.421	0.000265	0.00753
Caudate	PDE7B	ENSG00000171408.9	protein_coding	6	-0.271	0.00468	0.0416
Caudate	SLC35D3	ENSG00000182747.4	protein_coding	6	-0.825	2.35e-05	0.00196
Caudate	IL20RA	ENSG00000016402.8	protein_coding	6	0.288	0.00419	0.0389
Caudate	NHSL1	ENSG00000135540.7	protein_coding	6	0.302	0.00381	0.0367
Caudate	RP11-390P2.4	ENSG00000225177.1	antisense	6	0.313	0.00183	0.023
Caudate	ECT2L	ENSG00000203734.7	protein_coding	6	0.707	0.00143	0.0201
Caudate	RP3-509I19.1	ENSG00000225415.1	pseudogene	6	1.39	0.000213	0.0067
Caudate	RP11-12A2.3	ENSG00000238099.1	lincRNA	6	0.431	0.00524	0.0448
Caudate	VTA1	ENSG00000009844.11	protein_coding	6	-0.141	8.02e-05	0.00394
Caudate	HIVEP2	ENSG00000010818.4	protein_coding	6	-0.324	6.68e-05	0.00358
Caudate	STXBP5	ENSG00000164506.10	protein_coding	6	-0.255	0.000436	0.00981
Caudate	SAMD5	ENSG00000203727.3	protein_coding	6	-0.434	0.000584	0.0117
Caudate	PCMT1	ENSG00000120265.12	protein_coding	6	-0.347	4.31e-05	0.00278
Caudate	LRP11	ENSG00000120256.5	protein_coding	6	-0.23	0.00169	0.022
Caudate	RAET1G	ENSG00000203722.3	protein_coding	6	0.496	0.00126	0.0188
Caudate	C6orf211	ENSG00000146476.6	protein_coding	6	-0.251	0.000112	0.00475
Caudate	CCDC170	ENSG00000120262.8	protein_coding	6	0.948	0.000499	0.0107
Caudate	RGS17	ENSG00000091844.3	protein_coding	6	-0.298	0.00601	0.0484
Caudate	IPCEF1	ENSG00000074706.9	protein_coding	6	-0.429	0.000431	0.00973
Caudate	TIAM2	ENSG00000146426.13	protein_coding	6	-0.565	7.29e-06	0.00113
Caudate	TMEM242	ENSG00000215712.6	protein_coding	6	-0.154	2.29e-05	0.00193
Caudate	TMEM181	ENSG00000146433.8	protein_coding	6	-0.197	0.00156	0.021
Caudate	EZR	ENSG00000092820.13	protein_coding	6	0.309	0.000518	0.0109
Caudate	RP1-111C20.4	ENSG00000271913.1	antisense	6	0.337	0.00276	0.0298
Caudate	TAGAP	ENSG00000164691.12	protein_coding	6	0.702	0.00027	0.00762
Caudate	SOD2	ENSG00000112096.12	protein_coding	6	-0.455	0.00261	0.0288
Caudate	ACAT2	ENSG00000120437.7	protein_coding	6	-0.185	0.00466	0.0415
Caudate	TCP1	ENSG00000120438.7	protein_coding	6	-0.26	0.00117	0.0179
Caudate	RP3-428L16.2	ENSG00000272841.1	antisense	6	-0.29	0.00344	0.0344
Caudate	PACRG	ENSG00000112530.7	protein_coding	6	0.263	0.0061	0.0489
Caudate	RP11-300M24.1	ENSG00000227455.2	lincRNA	6	0.566	0.00112	0.0174
Caudate	C6orf118	ENSG00000112539.10	protein_coding	6	1.24	1.15e-05	0.00139
Caudate	PDE10A	ENSG00000112541.9	protein_coding	6	-1.03	1.03e-07	0.000167
Caudate	WDR27	ENSG00000184465.11	protein_coding	6	0.204	0.000237	0.00722
Caudate	LINC00242	ENSG00000229214.1	lincRNA	6	-0.432	0.00145	0.0202
Caudate	TBP	ENSG00000112592.8	protein_coding	6	-0.112	0.00431	0.0396
Caudate	GPER1	ENSG00000164850.10	protein_coding	7	0.339	0.00248	0.0281
Caudate	LFNG	ENSG00000106003.8	protein_coding	7	0.46	5.35e-05	0.00322
Caudate	CARD11	ENSG00000198286.5	protein_coding	7	0.498	0.00345	0.0344
Caudate	SDK1	ENSG00000146555.14	protein_coding	7	0.538	0.000256	0.00741
Caudate	SLC29A4	ENSG00000164638.6	protein_coding	7	0.446	8.98e-06	0.00124
Caudate	AC092171.2	ENSG00000188365.3	antisense	7	0.485	0.00385	0.0369
Caudate	RSPH10B	ENSG00000155026.12	protein_coding	7	1.07	1.09e-06	0.000476
Caudate	FAM220A	ENSG00000178397.8	protein_coding	7	-0.17	0.000444	0.00991
Caudate	RSPH10B2	ENSG00000169402.11	protein_coding	7	0.927	0.00444	0.0403
Caudate	COL28A1	ENSG00000215018.5	protein_coding	7	0.439	0.000193	0.00633
Caudate	NDUFA4	ENSG00000189043.5	protein_coding	7	-0.245	0.000965	0.0159
Caudate	AC005281.1	ENSG00000226690.2	lincRNA	7	2.4	0.00026	0.00745
Caudate	AC005281.2	ENSG00000225606.1	antisense	7	1.19	0.00191	0.0237
Caudate	DGKB	ENSG00000136267.9	protein_coding	7	-0.804	1.32e-05	0.00149
Caudate	ANKMY2	ENSG00000106524.4	protein_coding	7	-0.257	8.36e-05	0.004
Caudate	BZW2	ENSG00000136261.10	protein_coding	7	-0.478	1.88e-05	0.00172
Caudate	TSPAN13	ENSG00000106537.7	protein_coding	7	-0.438	0.00053	0.011
Caudate	AGR3	ENSG00000173467.4	protein_coding	7	1.59	0.00129	0.019
Caudate	TWISTNB	ENSG00000105849.5	protein_coding	7	-0.162	0.00233	0.0269
Caudate	TMEM196	ENSG00000173452.9	protein_coding	7	-0.689	1.05e-05	0.0013
Caudate	DNAH11	ENSG00000105877.13	protein_coding	7	1.29	1.48e-05	0.00152
Caudate	GPNMB	ENSG00000136235.11	protein_coding	7	0.553	0.00292	0.0309
Caudate	CCDC126	ENSG00000169193.7	protein_coding	7	-0.232	0.000463	0.0102
Caudate	STK31	ENSG00000196335.8	protein_coding	7	-0.496	0.00208	0.0251
Caudate	CYCS	ENSG00000172115.4	protein_coding	7	-0.196	0.000685	0.0129
Caudate	AC003090.1	ENSG00000223561.2	lincRNA	7	0.594	0.000127	0.00502
Caudate	CBX3	ENSG00000122565.14	protein_coding	7	-0.109	0.00569	0.0468
Caudate	SNX10	ENSG00000086300.11	protein_coding	7	-0.374	0.000399	0.00938
Caudate	JAZF1	ENSG00000153814.7	protein_coding	7	-0.242	0.00355	0.0349
Caudate	WIPF3	ENSG00000122574.6	protein_coding	7	-0.436	0.00139	0.0197
Caudate	GARS	ENSG00000106105.9	protein_coding	7	-0.297	2.73e-06	0.000715
Caudate	INMT	ENSG00000241644.2	protein_coding	7	0.488	0.00181	0.023
Caudate	GHRHR	ENSG00000106128.14	protein_coding	7	0.566	7.72e-05	0.00387
Caudate	ADCYAP1R1	ENSG00000078549.10	protein_coding	7	0.319	0.000722	0.0133
Caudate	KIAA0895	ENSG00000164542.8	protein_coding	7	-0.229	0.000301	0.00806
Caudate	AMPH	ENSG00000078053.12	protein_coding	7	-0.342	0.00172	0.0223
Caudate	C7orf10	ENSG00000175600.11	protein_coding	7	0.307	0.000608	0.0119
Caudate	INHBA	ENSG00000122641.9	protein_coding	7	-0.789	2.8e-05	0.00215
Caudate	MRPL32	ENSG00000106591.3	protein_coding	7	-0.175	0.00152	0.0207
Caudate	AC005537.2	ENSG00000232006.4	processed_transcript	7	-0.894	7.22e-05	0.00373
Caudate	HECW1	ENSG00000002746.10	protein_coding	7	-0.377	0.00139	0.0197
Caudate	AC004951.6	ENSG00000228434.1	lincRNA	7	0.498	0.00622	0.0496
Caudate	PURB	ENSG00000146676.5	protein_coding	7	-0.126	0.00211	0.0253
Caudate	RP4-673M15.1	ENSG00000272768.1	antisense	7	-0.291	0.00406	0.0382
Caudate	SNHG15	ENSG00000232956.4	lincRNA	7	-0.211	0.00469	0.0417
Caudate	TBRG4	ENSG00000136270.9	protein_coding	7	-0.124	0.0037	0.036
Caudate	ADCY1	ENSG00000164742.10	protein_coding	7	-0.508	0.00128	0.0189
Caudate	TNS3	ENSG00000136205.12	protein_coding	7	0.465	3.33e-05	0.00236
Caudate	C7orf57	ENSG00000164746.9	protein_coding	7	1.23	2.55e-05	0.00206
Caudate	GRB10	ENSG00000106070.13	protein_coding	7	-0.266	0.000569	0.0115
Caudate	VSTM2A	ENSG00000170419.6	protein_coding	7	-0.56	0.000345	0.00862
Caudate	GS1-18A18.1	ENSG00000224223.1	sense_overlapping	7	-0.465	0.00399	0.0377
Caudate	SEC61G	ENSG00000132432.9	protein_coding	7	-0.2	0.000285	0.00782
Caudate	ZNF713	ENSG00000178665.10	protein_coding	7	0.501	0.000197	0.00638
Caudate	CCT6A	ENSG00000146731.6	protein_coding	7	-0.238	8.63e-05	0.00407
Caudate	PHKG1	ENSG00000164776.5	protein_coding	7	0.346	0.00316	0.0325
Caudate	CHCHD2	ENSG00000106153.12	protein_coding	7	-0.169	0.000289	0.00787
Caudate	CCT6P1	ENSG00000228409.1	pseudogene	7	-0.21	0.00521	0.0447
Caudate	VKORC1L1	ENSG00000196715.5	protein_coding	7	-0.133	0.00173	0.0223
Caudate	LINC00174	ENSG00000179406.6	lincRNA	7	0.222	0.00601	0.0484
Caudate	GS1-124K5.11	ENSG00000229180.4	lincRNA	7	0.166	0.00148	0.0204
Caudate	RP11-458F8.4	ENSG00000273142.1	lincRNA	7	0.279	0.0021	0.0252
Caudate	TMEM248	ENSG00000106609.12	protein_coding	7	-0.106	0.00281	0.0301
Caudate	SBDS	ENSG00000126524.5	protein_coding	7	-0.149	0.000293	0.00792
Caudate	WBSCR17	ENSG00000185274.7	protein_coding	7	-0.464	0.000976	0.016
Caudate	CALN1	ENSG00000183166.6	protein_coding	7	-0.382	0.000961	0.0159
Caudate	POM121	ENSG00000196313.7	protein_coding	7	-0.163	0.00137	0.0196
Caudate	FZD9	ENSG00000188763.3	protein_coding	7	0.368	0.000158	0.00568
Caudate	WBSCR22	ENSG00000071462.7	protein_coding	7	-0.103	0.00581	0.0475
Caudate	CLDN3	ENSG00000165215.5	protein_coding	7	1.14	0.000294	0.00792
Caudate	CLDN4	ENSG00000189143.8	protein_coding	7	0.392	0.00531	0.0452
Caudate	WBSCR27	ENSG00000165171.6	protein_coding	7	0.706	0.000153	0.00561
Caudate	WBSCR28	ENSG00000175877.3	protein_coding	7	2.66	1.93e-06	0.000569
Caudate	CTB-51J22.1	ENSG00000232415.1	antisense	7	0.707	0.00254	0.0284
Caudate	EIF4H	ENSG00000106682.10	protein_coding	7	-0.13	1.33e-05	0.00149
Caudate	GTF2IRD2	ENSG00000196275.9	protein_coding	7	0.256	0.00133	0.0194
Caudate	GTF2IRD2B	ENSG00000174428.12	protein_coding	7	0.235	0.004	0.0378
Caudate	POM121C	ENSG00000135213.8	protein_coding	7	-0.102	0.00287	0.0305
Caudate	MDH2	ENSG00000146701.7	protein_coding	7	-0.267	4.23e-06	0.00084
Caudate	YWHAG	ENSG00000170027.5	protein_coding	7	-0.45	9.93e-06	0.00127
Caudate	CCDC146	ENSG00000135205.10	protein_coding	7	0.367	0.00585	0.0476
Caudate	CD36	ENSG00000135218.13	protein_coding	7	1.01	0.000293	0.00792
Caudate	CACNA2D1	ENSG00000153956.11	protein_coding	7	-0.312	0.00115	0.0176
Caudate	TP53TG1	ENSG00000182165.13	lincRNA	7	0.154	0.00501	0.0436
Caudate	SLC25A40	ENSG00000075303.8	protein_coding	7	-0.284	3.83e-05	0.0026
Caudate	SRI	ENSG00000075142.9	protein_coding	7	0.172	0.00409	0.0383
Caudate	C7orf63	ENSG00000105792.15	protein_coding	7	0.335	0.00572	0.0469
Caudate	FAM133B	ENSG00000234545.3	protein_coding	7	-0.151	0.00356	0.035
Caudate	CCDC132	ENSG00000004766.11	protein_coding	7	-0.17	0.00227	0.0265
Caudate	PPP1R9A	ENSG00000158528.7	protein_coding	7	-0.22	0.00318	0.0326
Caudate	AC002451.3	ENSG00000231170.1	antisense	7	0.812	1.9e-05	0.00172
Caudate	DYNC1I1	ENSG00000158560.10	protein_coding	7	-0.538	8.45e-05	0.00402
Caudate	DLX6-AS1	ENSG00000231764.4	antisense	7	-0.664	0.000655	0.0125
Caudate	DLX6	ENSG00000006377.9	protein_coding	7	-0.524	0.00151	0.0206
Caudate	TAC1	ENSG00000006128.7	protein_coding	7	-0.644	0.000696	0.0131
Caudate	ASNS	ENSG00000070669.12	protein_coding	7	-0.272	0.00206	0.0249
Caudate	LMTK2	ENSG00000164715.5	protein_coding	7	-0.373	2.71e-05	0.00211
Caudate	TMEM130	ENSG00000166448.10	protein_coding	7	-0.446	0.00611	0.049
Caudate	SMURF1	ENSG00000198742.5	protein_coding	7	-0.151	8.1e-05	0.00395
Caudate	BUD31	ENSG00000106245.5	protein_coding	7	-0.161	0.000109	0.00468
Caudate	ZNF655	ENSG00000197343.6	protein_coding	7	-0.116	0.00085	0.0147
Caudate	CNPY4	ENSG00000166997.3	protein_coding	7	0.277	0.00115	0.0176
Caudate	GPC2	ENSG00000213420.3	protein_coding	7	0.341	6.11e-06	0.00101
Caudate	PCOLCE-AS1	ENSG00000224729.4	antisense	7	0.609	0.00141	0.02
Caudate	MOSPD3	ENSG00000106330.7	protein_coding	7	0.151	0.00437	0.0399
Caudate	POP7	ENSG00000172336.4	protein_coding	7	-0.177	0.006	0.0484
Caudate	ACHE	ENSG00000087085.9	protein_coding	7	-0.392	0.00383	0.0368
Caudate	AP1S1	ENSG00000106367.9	protein_coding	7	-0.383	0.00148	0.0204
Caudate	POLR2J3	ENSG00000168255.14	protein_coding	7	0.43	6.69e-05	0.00358
Caudate	RASA4	ENSG00000105808.13	protein_coding	7	0.291	0.00476	0.0421
Caudate	FBXL13	ENSG00000161040.12	protein_coding	7	0.433	0.00146	0.0202
Caudate	ARMC10	ENSG00000170632.9	protein_coding	7	-0.133	0.000484	0.0105
Caudate	ORC5	ENSG00000164815.6	protein_coding	7	-0.162	0.00558	0.0464
Caudate	KMT2E-AS1	ENSG00000239569.2	antisense	7	0.295	0.000393	0.00931
Caudate	SRPK2	ENSG00000135250.12	protein_coding	7	-0.227	0.000344	0.00861
Caudate	PUS7	ENSG00000091127.9	protein_coding	7	-0.221	0.00176	0.0225
Caudate	RINT1	ENSG00000135249.3	protein_coding	7	-0.16	0.00395	0.0375
Caudate	PRKAR2B	ENSG00000005249.8	protein_coding	7	-0.313	0.000966	0.0159
Caudate	GPR22	ENSG00000172209.4	protein_coding	7	-0.758	4.19e-05	0.00272
Caudate	DNAJB9	ENSG00000128590.4	protein_coding	7	-0.258	6.43e-05	0.00351
Caudate	AC005487.2	ENSG00000225647.1	lincRNA	7	1.13	0.000541	0.0112
Caudate	DOCK4	ENSG00000128512.15	protein_coding	7	-0.259	0.000929	0.0156
Caudate	MET	ENSG00000105976.10	protein_coding	7	-0.572	0.00568	0.0467
Caudate	CTTNBP2	ENSG00000077063.6	protein_coding	7	-0.218	0.0036	0.0353
Caudate	KCND2	ENSG00000184408.5	protein_coding	7	-0.401	0.00225	0.0264
Caudate	FAM3C	ENSG00000196937.6	protein_coding	7	-0.326	1.83e-05	0.00168
Caudate	CADPS2	ENSG00000081803.11	protein_coding	7	0.283	0.0025	0.0281
Caudate	IQUB	ENSG00000164675.6	protein_coding	7	0.971	1.24e-05	0.00143
Caudate	WASL	ENSG00000106299.7	protein_coding	7	-0.17	0.00112	0.0173
Caudate	SMO	ENSG00000128602.5	protein_coding	7	0.336	0.00623	0.0497
Caudate	STRIP2	ENSG00000128578.5	protein_coding	7	-0.518	0.000987	0.016
Caudate	RP11-448A19.1	ENSG00000273329.1	lincRNA	7	0.174	0.00559	0.0464
Caudate	NRF1	ENSG00000106459.10	protein_coding	7	0.0933	0.00175	0.0224
Caudate	MKLN1-AS2	ENSG00000236753.1	processed_transcript	7	0.263	0.00038	0.00916
Caudate	PLXNA4	ENSG00000221866.5	protein_coding	7	-0.447	0.00191	0.0237
Caudate	CHCHD3	ENSG00000106554.7	protein_coding	7	-0.132	0.000329	0.00842
Caudate	LRGUK	ENSG00000155530.2	protein_coding	7	0.703	0.0012	0.0182
Caudate	SLC13A4	ENSG00000164707.11	protein_coding	7	0.495	0.00259	0.0287
Caudate	MTPN	ENSG00000105887.10	protein_coding	7	-0.427	0.000278	0.00775
Caudate	PTN	ENSG00000105894.7	protein_coding	7	0.26	0.000418	0.00961
Caudate	DGKI	ENSG00000157680.11	protein_coding	7	-0.539	0.000193	0.00633
Caudate	SVOPL	ENSG00000157703.11	protein_coding	7	0.552	0.00354	0.0349
Caudate	TBXAS1	ENSG00000059377.11	protein_coding	7	0.382	0.00607	0.0488
Caudate	BRAF	ENSG00000157764.8	protein_coding	7	-0.222	3.67e-05	0.00254
Caudate	TMEM178B	ENSG00000261115.1	protein_coding	7	-0.301	0.00153	0.0207
Caudate	WEE2-AS1	ENSG00000228775.3	antisense	7	0.634	3.31e-06	0.000758
Caudate	TRBV24-1	ENSG00000211750.2	TR_V_gene	7	-1.41	0.000176	0.0061
Caudate	EPHB6	ENSG00000106123.7	protein_coding	7	-0.354	0.00349	0.0346
Caudate	TRPV6	ENSG00000165125.13	protein_coding	7	-0.533	0.000341	0.00855
Caudate	FAM115A	ENSG00000198420.5	protein_coding	7	-0.378	0.0015	0.0205
Caudate	CNTNAP2	ENSG00000174469.13	protein_coding	7	-0.391	0.000354	0.00875
Caudate	CUL1	ENSG00000055130.11	protein_coding	7	-0.131	1.67e-05	0.00161
Caudate	ATP6V0E2	ENSG00000171130.13	protein_coding	7	-0.167	0.00606	0.0488
Caudate	ACTR3C	ENSG00000106526.6	protein_coding	7	-0.258	0.00511	0.0441
Caudate	ATG9B	ENSG00000181652.14	protein_coding	7	0.344	0.0026	0.0288
Caudate	RHEB	ENSG00000106615.5	protein_coding	7	-0.138	0.000697	0.0131
Caudate	PRKAG2	ENSG00000106617.9	protein_coding	7	-0.335	0.000428	0.00973
Caudate	GALNTL5	ENSG00000106648.9	protein_coding	7	-0.735	8.49e-05	0.00402
Caudate	ACTR3B	ENSG00000133627.13	protein_coding	7	-0.428	0.000639	0.0123
Caudate	DPP6	ENSG00000130226.12	protein_coding	7	-0.339	0.00509	0.044
Caudate	RP11-5C23.1	ENSG00000272760.1	antisense	7	0.286	0.00268	0.0293
Caudate	HTR5A-AS1	ENSG00000220575.3	protein_coding	7	-0.865	5e-06	0.000919
Caudate	HTR5A	ENSG00000157219.3	protein_coding	7	-0.612	0.00117	0.0178
Caudate	LMBR1	ENSG00000105983.15	protein_coding	7	-0.173	0.00214	0.0255
Caudate	UBE3C	ENSG00000009335.13	protein_coding	7	-0.153	0.000325	0.00837
Caudate	PTPRN2	ENSG00000155093.13	protein_coding	7	-0.407	0.0016	0.0213
Caudate	FBXO25	ENSG00000147364.12	protein_coding	8	-0.15	0.000123	0.00494
Caudate	DLGAP2	ENSG00000198010.7	protein_coding	8	-0.49	0.00165	0.0217
Caudate	SGK223	ENSG00000182319.5	protein_coding	8	-0.372	0.000924	0.0155
Caudate	MTMR9	ENSG00000104643.5	protein_coding	8	-0.139	0.00154	0.0209
Caudate	C8orf12	ENSG00000184608.4	protein_coding	8	0.78	0.00023	0.00705
Caudate	CTSB	ENSG00000164733.16	protein_coding	8	-0.135	0.0039	0.0372
Caudate	TUSC3	ENSG00000104723.16	protein_coding	8	-0.385	0.00168	0.0219
Caudate	MICU3	ENSG00000155970.7	protein_coding	8	-0.293	0.00457	0.041
Caudate	CNOT7	ENSG00000198791.7	protein_coding	8	-0.136	0.00167	0.0219
Caudate	VPS37A	ENSG00000155975.5	protein_coding	8	-0.141	0.000656	0.0125
Caudate	MTMR7	ENSG00000003987.9	protein_coding	8	-0.403	0.000272	0.00763
Caudate	PSD3	ENSG00000156011.12	protein_coding	8	-0.445	9.13e-05	0.00422
Caudate	LPL	ENSG00000175445.10	protein_coding	8	-0.635	6.15e-05	0.00345
Caudate	ATP6V1B2	ENSG00000147416.6	protein_coding	8	-0.228	0.000754	0.0137
Caudate	LGI3	ENSG00000168481.4	protein_coding	8	-0.285	0.0044	0.0401
Caudate	C8orf58	ENSG00000241852.5	protein_coding	8	0.238	0.00457	0.041
Caudate	EGR3	ENSG00000179388.8	protein_coding	8	-0.632	0.000125	0.00499
Caudate	RP11-875O11.1	ENSG00000245025.2	antisense	8	0.461	0.000707	0.0132
Caudate	CHMP7	ENSG00000147457.9	protein_coding	8	-0.0957	0.00222	0.0262
Caudate	ENTPD4	ENSG00000197217.8	protein_coding	8	-0.197	3.08e-05	0.00226
Caudate	ADAM28	ENSG00000042980.8	protein_coding	8	0.5	0.00381	0.0367
Caudate	GS1-72M22.1	ENSG00000272163.1	antisense	8	-0.584	0.000326	0.00838
Caudate	NEFM	ENSG00000104722.9	protein_coding	8	-0.518	0.00383	0.0368
Caudate	NEFL	ENSG00000104725.9	processed_transcript	8	-0.668	0.000316	0.00828
Caudate	PPP2R2A	ENSG00000221914.4	protein_coding	8	-0.242	1.41e-05	0.00152
Caudate	PNMA2	ENSG00000240694.4	protein_coding	8	-0.32	0.00127	0.0189
Caudate	TRIM35	ENSG00000104228.8	protein_coding	8	-0.15	0.00404	0.038
Caudate	TMEM66	ENSG00000133872.9	protein_coding	8	-0.106	0.00132	0.0193
Caudate	UBXN8	ENSG00000104691.10	processed_transcript	8	-0.128	0.00403	0.038
Caudate	RP11-722E23.2	ENSG00000272338.1	lincRNA	8	0.305	0.00311	0.0321
Caudate	MAK16	ENSG00000198042.6	protein_coding	8	-0.159	0.00281	0.0301
Caudate	RP11-863K10.2	ENSG00000253181.1	antisense	8	0.87	0.00626	0.0498
Caudate	BRF2	ENSG00000104221.8	protein_coding	8	-0.168	0.00458	0.041
Caudate	STAR	ENSG00000147465.7	protein_coding	8	-0.422	0.00418	0.0388
Caudate	BAG4	ENSG00000156735.6	protein_coding	8	-0.295	0.000118	0.00486
Caudate	DDHD2	ENSG00000085788.9	protein_coding	8	-0.208	0.00486	0.0427
Caudate	RP11-350N15.6	ENSG00000272159.1	antisense	8	0.59	0.00596	0.0482
Caudate	TM2D2	ENSG00000169490.12	protein_coding	8	-0.164	4.39e-05	0.0028
Caudate	ZMAT4	ENSG00000165061.10	protein_coding	8	-0.427	0.00128	0.0189
Caudate	IKBKB	ENSG00000104365.9	protein_coding	8	0.156	0.0014	0.0198
Caudate	RP11-1134I14.4	ENSG00000254348.1	pseudogene	8	-0.37	0.00552	0.0461
Caudate	SPIDR	ENSG00000164808.12	protein_coding	8	-0.114	0.00556	0.0463
Caudate	UBE2V2	ENSG00000169139.7	protein_coding	8	-0.239	6.08e-05	0.00344
Caudate	EFCAB1	ENSG00000034239.6	protein_coding	8	1.45	0.000105	0.00456
Caudate	ATP6V1H	ENSG00000047249.12	protein_coding	8	-0.306	0.000336	0.00849
Caudate	MRPL15	ENSG00000137547.4	protein_coding	8	-0.117	0.00414	0.0386
Caudate	XKR4	ENSG00000206579.7	protein_coding	8	-0.344	0.00521	0.0447
Caudate	SDR16C5	ENSG00000170786.8	protein_coding	8	-0.57	0.000721	0.0133
Caudate	PENK	ENSG00000181195.6	protein_coding	8	-0.761	0.00519	0.0446
Caudate	RP11-17A4.2	ENSG00000254254.1	antisense	8	-1.22	0.000109	0.00468
Caudate	CTD-2339F6.1	ENSG00000254139.1	lincRNA	8	0.652	0.000553	0.0113
Caudate	SDCBP	ENSG00000137575.7	protein_coding	8	-0.218	4.15e-06	0.00084
Caudate	RAB2A	ENSG00000104388.10	protein_coding	8	-0.203	7.75e-05	0.00387
Caudate	CLVS1	ENSG00000177182.6	protein_coding	8	-0.591	0.000183	0.00621
Caudate	YTHDF3	ENSG00000185728.12	protein_coding	8	-0.139	0.00101	0.0163
Caudate	RP11-16E18.3	ENSG00000261542.1	lincRNA	8	-0.337	0.00104	0.0166
Caudate	ARMC1	ENSG00000104442.5	protein_coding	8	-0.133	0.00355	0.035
Caudate	TRIM55	ENSG00000147573.12	protein_coding	8	1.02	0.000293	0.00792
Caudate	TCF24	ENSG00000261787.1	protein_coding	8	1.12	0.000161	0.00577
Caudate	PPP1R42	ENSG00000178125.10	protein_coding	8	1.06	3.4e-06	0.000767
Caudate	RP11-409C19.2	ENSG00000253223.1	pseudogene	8	1.06	3.77e-05	0.00257
Caudate	SLCO5A1	ENSG00000137571.6	protein_coding	8	-0.409	0.00388	0.037
Caudate	EYA1	ENSG00000104313.13	protein_coding	8	-0.384	0.00105	0.0166
Caudate	KCNB2	ENSG00000182674.5	protein_coding	8	-0.504	0.00308	0.0319
Caudate	STAU2	ENSG00000040341.13	protein_coding	8	-0.214	0.00107	0.0168
Caudate	UBE2W	ENSG00000104343.15	protein_coding	8	-0.18	0.00149	0.0205
Caudate	TCEB1	ENSG00000154582.12	protein_coding	8	-0.216	2.19e-06	0.000614
Caudate	TMEM70	ENSG00000175606.6	protein_coding	8	-0.272	2.56e-05	0.00206
Caudate	JPH1	ENSG00000104369.4	protein_coding	8	-0.405	0.00173	0.0223
Caudate	GDAP1	ENSG00000104381.8	protein_coding	8	-0.298	0.000847	0.0147
Caudate	HNF4G	ENSG00000164749.7	protein_coding	8	0.407	0.00461	0.0412
Caudate	PKIA	ENSG00000171033.8	protein_coding	8	-0.331	0.000251	0.00739
Caudate	RP11-1114I9.1	ENSG00000253659.1	lincRNA	8	-0.869	0.00134	0.0194
Caudate	STMN2	ENSG00000104435.9	protein_coding	8	-0.485	0.00215	0.0255
Caudate	TPD52	ENSG00000076554.11	protein_coding	8	-0.244	0.00523	0.0447
Caudate	SLC10A5	ENSG00000253598.1	protein_coding	8	-0.386	0.00429	0.0396
Caudate	WWP1	ENSG00000123124.9	protein_coding	8	-0.262	7.9e-06	0.00115
Caudate	CALB1	ENSG00000104327.3	protein_coding	8	-0.78	0.000574	0.0115
Caudate	NECAB1	ENSG00000123119.7	protein_coding	8	-0.357	0.000675	0.0128
Caudate	PDP1	ENSG00000164951.11	protein_coding	8	-0.528	8.28e-05	0.00398
Caudate	NDUFAF6	ENSG00000156170.8	protein_coding	8	-0.122	0.00597	0.0482
Caudate	KB-1047C11.2	ENSG00000253773.1	lincRNA	8	0.563	0.00578	0.0473
Caudate	PTDSS1	ENSG00000156471.8	protein_coding	8	-0.157	0.00181	0.0229
Caudate	TSPYL5	ENSG00000180543.3	protein_coding	8	-0.215	0.00354	0.0349
Caudate	C8orf47	ENSG00000177459.6	protein_coding	8	-0.431	0.00378	0.0365
Caudate	KCNS2	ENSG00000156486.7	protein_coding	8	-0.688	0.00108	0.017
Caudate	RGS22	ENSG00000132554.15	protein_coding	8	0.809	0.00015	0.00555
Caudate	POLR2K	ENSG00000147669.6	protein_coding	8	-0.115	0.00108	0.017
Caudate	SNX31	ENSG00000174226.4	protein_coding	8	0.803	0.00469	0.0417
Caudate	YWHAZ	ENSG00000164924.13	protein_coding	8	-0.304	0.000589	0.0117
Caudate	ATP6V1C1	ENSG00000155097.7	protein_coding	8	-0.242	3.85e-05	0.0026
Caudate	SLC25A32	ENSG00000164933.7	protein_coding	8	-0.196	0.00193	0.0239
Caudate	RIMS2	ENSG00000176406.16	protein_coding	8	-0.379	0.00168	0.0219
Caudate	LRP12	ENSG00000147650.7	protein_coding	8	-0.257	0.000875	0.0149
Caudate	PKHD1L1	ENSG00000205038.7	protein_coding	8	0.704	0.00513	0.0442
Caudate	KCNV1	ENSG00000164794.4	protein_coding	8	-0.575	0.00229	0.0266
Caudate	AARD	ENSG00000205002.3	protein_coding	8	-0.543	0.00144	0.0202
Caudate	SAMD12	ENSG00000177570.9	protein_coding	8	-0.309	0.00229	0.0266
Caudate	TNFRSF11B	ENSG00000164761.4	protein_coding	8	1.29	0.000256	0.00741
Caudate	MAL2	ENSG00000147676.9	protein_coding	8	-0.555	0.000576	0.0116
Caudate	ANXA13	ENSG00000104537.12	protein_coding	8	0.827	0.00325	0.0331
Caudate	FAM49B	ENSG00000153310.14	protein_coding	8	-0.416	2.63e-05	0.00208
Caudate	ADCY8	ENSG00000155897.5	protein_coding	8	0.27	0.00422	0.039
Caudate	KCNQ3	ENSG00000184156.11	protein_coding	8	-0.517	0.0002	0.00645
Caudate	PHF20L1	ENSG00000129292.16	protein_coding	8	-0.166	0.00169	0.022
Caudate	RP11-431D12.1	ENSG00000253839.1	lincRNA	8	1.66	0.00343	0.0343
Caudate	FAM135B	ENSG00000147724.7	protein_coding	8	-0.388	2.01e-05	0.00179
Caudate	COL22A1	ENSG00000169436.12	protein_coding	8	1.47	1.5e-06	0.000514
Caudate	MAPK15	ENSG00000181085.10	protein_coding	8	1.52	8.96e-06	0.00124
Caudate	FAM83H-AS1	ENSG00000203499.6	lincRNA	8	0.539	0.00507	0.0439
Caudate	EPPK1	ENSG00000227184.3	protein_coding	8	1.17	8.5e-06	0.00122
Caudate	CYC1	ENSG00000179091.4	protein_coding	8	-0.133	0.00188	0.0235
Caudate	RP11-125B21.2	ENSG00000236404.4	antisense	9	-0.416	0.00394	0.0374
Caudate	VLDLR	ENSG00000147852.11	protein_coding	9	-0.338	0.0014	0.0198
Caudate	CDC37L1	ENSG00000106993.7	protein_coding	9	-0.162	4.23e-05	0.00274
Caudate	NFIB	ENSG00000147862.10	protein_coding	9	0.228	0.00551	0.046
Caudate	CER1	ENSG00000147869.4	protein_coding	9	-0.605	0.00196	0.0241
Caudate	SH3GL2	ENSG00000107295.8	protein_coding	9	-0.545	0.000478	0.0104
Caudate	RP11-146N23.1	ENSG00000232176.1	pseudogene	9	0.41	8.58e-05	0.00405
Caudate	RP11-513M16.7	ENSG00000272842.1	antisense	9	0.272	0.00619	0.0494
Caudate	SLC24A2	ENSG00000155886.7	protein_coding	9	-0.377	0.000737	0.0134
Caudate	FOCAD	ENSG00000188352.8	protein_coding	9	-0.285	0.00397	0.0376
Caudate	TUSC1	ENSG00000198680.3	protein_coding	9	-0.144	0.00194	0.024
Caudate	PLAA	ENSG00000137055.10	protein_coding	9	-0.137	0.000831	0.0145
Caudate	IFT74	ENSG00000096872.11	protein_coding	9	0.28	0.000335	0.00849
Caudate	MOB3B	ENSG00000120162.9	protein_coding	9	-0.264	0.000236	0.00718
Caudate	NDUFB6	ENSG00000165264.6	protein_coding	9	-0.157	0.00219	0.026
Caudate	UBE2R2	ENSG00000107341.4	protein_coding	9	-0.0887	0.00071	0.0132
Caudate	KIF24	ENSG00000186638.11	protein_coding	9	0.307	0.00521	0.0447
Caudate	DNAI1	ENSG00000122735.11	protein_coding	9	0.777	9.61e-06	0.00124
Caudate	DCTN3	ENSG00000137100.11	protein_coding	9	-0.146	0.00271	0.0294
Caudate	STOML2	ENSG00000165283.11	protein_coding	9	-0.113	0.00563	0.0466
Caudate	FAM166B	ENSG00000215187.5	protein_coding	9	1.57	1.26e-06	0.000487
Caudate	TPM2	ENSG00000198467.9	protein_coding	9	0.36	0.00028	0.00776
Caudate	SPAG8	ENSG00000137098.9	protein_coding	9	1.04	5.44e-06	0.000955
Caudate	HINT2	ENSG00000137133.6	protein_coding	9	0.15	0.00267	0.0292
Caudate	FAM221B	ENSG00000204930.5	protein_coding	9	0.605	0.0055	0.046
Caudate	TOMM5	ENSG00000175768.8	protein_coding	9	-0.149	0.00269	0.0293
Caudate	SHB	ENSG00000107338.8	protein_coding	9	-0.285	0.000193	0.00633
Caudate	IGFBPL1	ENSG00000137142.4	protein_coding	9	-0.683	0.00175	0.0224
Caudate	VN1R48P	ENSG00000237487.1	pseudogene	9	-0.658	0.00351	0.0347
Caudate	FAM74A3	ENSG00000204844.7	lincRNA	9	2.8	1.19e-05	0.0014
Caudate	BX255923.3	ENSG00000240907.1	lincRNA	9	1.29	0.00053	0.011
Caudate	PIP5K1B	ENSG00000107242.13	protein_coding	9	-0.309	0.0051	0.044
Caudate	C9orf135	ENSG00000204711.4	protein_coding	9	1.04	0.00452	0.0408
Caudate	MAMDC2-AS1	ENSG00000204706.10	antisense	9	0.35	0.00149	0.0204
Caudate	C9orf41	ENSG00000156017.8	protein_coding	9	-0.362	0.000128	0.00504
Caudate	OSTF1	ENSG00000134996.11	protein_coding	9	-0.203	0.000375	0.00908
Caudate	RFK	ENSG00000135002.7	protein_coding	9	-0.4	9.02e-06	0.00124
Caudate	VPS13A	ENSG00000197969.7	protein_coding	9	-0.206	0.00368	0.0358
Caudate	RASEF	ENSG00000165105.9	protein_coding	9	0.703	0.0031	0.0321
Caudate	UBQLN1	ENSG00000135018.9	protein_coding	9	-0.256	1.93e-08	7.88e-05
Caudate	KIF27	ENSG00000165115.10	protein_coding	9	0.364	0.00275	0.0298
Caudate	SLC28A3	ENSG00000197506.6	protein_coding	9	1.24	5.68e-06	0.000975
Caudate	GOLM1	ENSG00000135052.12	protein_coding	9	0.203	0.000378	0.00913
Caudate	ISCA1	ENSG00000135070.9	protein_coding	9	-0.159	0.00241	0.0275
Caudate	NXNL2	ENSG00000130045.11	protein_coding	9	0.872	0.000113	0.00476
Caudate	DIRAS2	ENSG00000165023.5	protein_coding	9	-0.53	0.00163	0.0216
Caudate	AUH	ENSG00000148090.7	protein_coding	9	-0.24	0.000484	0.0105
Caudate	ROR2	ENSG00000169071.10	protein_coding	9	1.04	1.74e-05	0.00164
Caudate	IARS	ENSG00000196305.13	protein_coding	9	-0.296	2.52e-06	0.000691
Caudate	IPPK	ENSG00000127080.5	protein_coding	9	-0.193	0.0055	0.046
Caudate	FGD3	ENSG00000127084.13	protein_coding	9	0.429	0.000854	0.0148
Caudate	FAM120A	ENSG00000048828.12	protein_coding	9	-0.108	9.18e-05	0.00422
Caudate	PTCH1	ENSG00000185920.11	protein_coding	9	0.397	3.68e-06	0.000803
Caudate	LINC00092	ENSG00000225194.2	lincRNA	9	0.385	0.00061	0.0119
Caudate	ZNF367	ENSG00000165244.6	protein_coding	9	-0.338	0.000547	0.0113
Caudate	HABP4	ENSG00000130956.9	protein_coding	9	-0.271	0.00193	0.0239
Caudate	RP11-520B13.4	ENSG00000228376.3	pseudogene	9	0.559	6.83e-05	0.00362
Caudate	CCDC180	ENSG00000197816.9	protein_coding	9	0.391	0.000789	0.014
Caudate	TMOD1	ENSG00000136842.9	protein_coding	9	-0.51	4.75e-06	0.000895
Caudate	TMEFF1	ENSG00000241697.3	protein_coding	9	-0.341	0.000316	0.00828
Caudate	TMEM246	ENSG00000165152.4	protein_coding	9	-0.283	0.00149	0.0205
Caudate	RAD23B	ENSG00000119318.8	protein_coding	9	-0.101	0.000145	0.00545
Caudate	FAM206A	ENSG00000119328.7	protein_coding	9	-0.16	0.000217	0.00682
Caudate	FRRS1L	ENSG00000260230.2	protein_coding	9	-0.469	0.000307	0.00815
Caudate	PTPN3	ENSG00000070159.9	protein_coding	9	0.956	0.000708	0.0132
Caudate	KIAA0368	ENSG00000136813.10	protein_coding	9	-0.215	0.000778	0.0139
Caudate	GNG10	ENSG00000242616.3	protein_coding	9	-0.233	0.000723	0.0133
Caudate	UGCG	ENSG00000148154.5	protein_coding	9	-0.284	4.81e-06	0.000897
Caudate	RP11-4O1.2	ENSG00000259953.1	sense_overlapping	9	-0.34	0.00355	0.0349
Caudate	PTBP3	ENSG00000119314.11	protein_coding	9	-0.147	0.00171	0.0222
Caudate	POLE3	ENSG00000148229.8	protein_coding	9	-0.123	0.00267	0.0292
Caudate	C9orf43	ENSG00000157653.7	protein_coding	9	0.355	0.00457	0.041
Caudate	COL27A1	ENSG00000196739.10	protein_coding	9	0.326	0.00531	0.0452
Caudate	C9orf91	ENSG00000157693.10	protein_coding	9	-0.26	0.00134	0.0195
Caudate	TRIM32	ENSG00000119401.10	protein_coding	9	-0.155	0.00226	0.0264
Caudate	RPL10P3	ENSG00000230734.1	pseudogene	9	0.91	3.42e-05	0.00239
Caudate	C5	ENSG00000106804.6	protein_coding	9	0.201	0.00451	0.0407
Caudate	CNTRL	ENSG00000119397.12	protein_coding	9	0.198	0.00492	0.0431
Caudate	GSN-AS1	ENSG00000235865.2	antisense	9	0.305	0.00523	0.0447
Caudate	RP11-244O19.1	ENSG00000261534.1	sense_overlapping	9	-0.283	0.00456	0.041
Caudate	MORN5	ENSG00000185681.8	protein_coding	9	0.899	2.88e-06	0.000722
Caudate	LHX6	ENSG00000106852.11	protein_coding	9	-0.32	0.00534	0.0453
Caudate	RBM18	ENSG00000119446.9	protein_coding	9	-0.119	0.00349	0.0346
Caudate	RC3H2	ENSG00000056586.11	protein_coding	9	-0.155	0.000586	0.0117
Caudate	RABGAP1	ENSG00000011454.12	protein_coding	9	0.135	0.000953	0.0158
Caudate	WDR38	ENSG00000136918.3	protein_coding	9	1.84	6.64e-06	0.00106
Caudate	ARPC5L	ENSG00000136950.9	protein_coding	9	-0.263	0.000163	0.00577
Caudate	GOLGA1	ENSG00000136935.9	protein_coding	9	0.0908	0.00233	0.0269
Caudate	SCAI	ENSG00000173611.13	protein_coding	9	-0.248	0.00423	0.039
Caudate	RABEPK	ENSG00000136933.12	protein_coding	9	-0.134	0.000966	0.0159
Caudate	HSPA5	ENSG00000044574.7	protein_coding	9	-0.319	0.00589	0.0478
Caudate	PBX3	ENSG00000167081.12	protein_coding	9	-0.221	0.00025	0.00737
Caudate	STXBP1	ENSG00000136854.13	protein_coding	9	-0.431	0.000191	0.00632
Caudate	C9orf117	ENSG00000160401.10	protein_coding	9	1.93	7.33e-07	0.000428
Caudate	TTC16	ENSG00000167094.11	protein_coding	9	0.792	4.05e-05	0.00266
Caudate	CDK9	ENSG00000136807.7	protein_coding	9	0.203	5.23e-05	0.00318
Caudate	AK1	ENSG00000106992.13	protein_coding	9	0.315	0.00201	0.0245
Caudate	SLC25A25	ENSG00000148339.8	protein_coding	9	-0.439	0.000143	0.00543
Caudate	RP11-216B9.6	ENSG00000228395.1	antisense	9	0.183	0.00611	0.049
Caudate	PHYHD1	ENSG00000175287.14	protein_coding	9	0.381	0.00149	0.0205
Caudate	C9orf50	ENSG00000179058.5	protein_coding	9	0.44	0.00471	0.0418
Caudate	TOR1A	ENSG00000136827.11	protein_coding	9	-0.113	0.00232	0.0269
Caudate	RP11-138E2.1	ENSG00000270755.1	lincRNA	9	0.436	0.00314	0.0323
Caudate	UCK1	ENSG00000130717.8	protein_coding	9	0.138	0.000804	0.0142
Caudate	RAPGEF1	ENSG00000107263.14	protein_coding	9	-0.167	0.00246	0.0279
Caudate	NTNG2	ENSG00000196358.6	protein_coding	9	0.348	0.000163	0.00577
Caudate	C9orf171	ENSG00000188523.4	protein_coding	9	1.94	4.5e-06	0.000861
Caudate	AK8	ENSG00000165695.5	protein_coding	9	0.497	0.000302	0.00807
Caudate	EEF1A1P5	ENSG00000196205.7	pseudogene	9	0.449	0.00236	0.0272
Caudate	LL09NC01-251B2.3	ENSG00000273249.1	antisense	9	0.453	0.00469	0.0417
Caudate	COL5A1	ENSG00000130635.11	protein_coding	9	0.599	0.00044	0.00986
Caudate	KCNT1	ENSG00000107147.7	protein_coding	9	-0.487	0.00277	0.0299
Caudate	CAMSAP1	ENSG00000130559.14	protein_coding	9	-0.164	0.00391	0.0372
Caudate	QSOX2	ENSG00000165661.11	protein_coding	9	-0.149	0.000732	0.0134
Caudate	C9orf163	ENSG00000196366.1	protein_coding	9	0.357	0.00266	0.0291
Caudate	LCN8	ENSG00000204001.5	protein_coding	9	1.02	0.00214	0.0255
Caudate	LCN12	ENSG00000184925.7	protein_coding	9	0.373	0.000953	0.0158
Caudate	ENTPD2	ENSG00000054179.7	protein_coding	9	0.7	2.22e-05	0.0019
Caudate	SAPCD2	ENSG00000186193.7	protein_coding	9	0.367	0.000253	0.00739
Caudate	C9orf169	ENSG00000197191.3	protein_coding	9	0.366	0.000502	0.0107
Caudate	RNF224	ENSG00000233198.2	protein_coding	9	0.555	0.000272	0.00763
Caudate	SLC34A3	ENSG00000198569.5	protein_coding	9	0.539	0.000761	0.0137
Caudate	IDI1	ENSG00000067064.6	protein_coding	10	-0.161	0.00383	0.0368
Caudate	AL392086.1	ENSG00000227821.1	pseudogene	10	0.539	0.000866	0.0149
Caudate	ATP5C1	ENSG00000165629.15	protein_coding	10	-0.127	0.00366	0.0358
Caudate	RP11-271F18.4	ENSG00000270111.1	lincRNA	10	-0.512	0.00216	0.0256
Caudate	CDC123	ENSG00000151465.9	protein_coding	10	-0.142	0.0046	0.0412
Caudate	CAMK1D	ENSG00000183049.8	protein_coding	10	-0.442	0.000397	0.00936
Caudate	SEPHS1	ENSG00000086475.10	protein_coding	10	0.155	0.000424	0.00968
Caudate	HSPA14	ENSG00000187522.9	protein_coding	10	-0.142	0.000959	0.0159
Caudate	OR7E26P	ENSG00000228547.5	pseudogene	10	0.636	0.000634	0.0122
Caudate	OR7E115P	ENSG00000182531.7	pseudogene	10	0.71	0.000373	0.00906
Caudate	DCLRE1CP1	ENSG00000237470.2	pseudogene	10	0.563	0.00173	0.0223
Caudate	CUBN	ENSG00000107611.10	protein_coding	10	0.364	0.000456	0.0101
Caudate	STAM	ENSG00000136738.10	protein_coding	10	-0.212	1.44e-05	0.00152
Caudate	CACNB2	ENSG00000165995.14	protein_coding	10	-0.357	0.00221	0.0261
Caudate	SPAG6	ENSG00000077327.11	protein_coding	10	1.8	1.04e-05	0.0013
Caudate	ARMC3	ENSG00000165309.9	protein_coding	10	0.997	1.37e-05	0.00151
Caudate	GPR158	ENSG00000151025.9	protein_coding	10	-0.687	4.04e-05	0.00265
Caudate	GAD2	ENSG00000136750.7	protein_coding	10	-0.589	0.000382	0.00918
Caudate	YME1L1	ENSG00000136758.14	protein_coding	10	-0.133	0.000288	0.00787
Caudate	ARMC4	ENSG00000169126.11	protein_coding	10	1.25	9.49e-06	0.00124
Caudate	MPP7	ENSG00000150054.14	protein_coding	10	-0.416	2.24e-05	0.00191
Caudate	ZNF438	ENSG00000183621.11	protein_coding	10	0.191	0.00241	0.0275
Caudate	CUL2	ENSG00000108094.10	protein_coding	10	-0.159	0.000395	0.00934
Caudate	CREM	ENSG00000095794.15	protein_coding	10	-0.141	0.00612	0.049
Caudate	CCNY	ENSG00000108100.13	protein_coding	10	-0.124	0.00273	0.0296
Caudate	ZNF25	ENSG00000175395.11	protein_coding	10	-0.263	0.00311	0.0321
Caudate	AL022344.7	ENSG00000259869.1	lincRNA	10	0.756	0.00018	0.00617
Caudate	RASGEF1A	ENSG00000198915.7	protein_coding	10	-0.269	0.0039	0.0371
Caudate	ZNF487	ENSG00000243660.5	protein_coding	10	0.388	0.000265	0.00753
Caudate	RP11-517P14.7	ENSG00000236114.1	pseudogene	10	0.432	0.00303	0.0317
Caudate	C10orf25	ENSG00000165511.4	protein_coding	10	0.194	0.00594	0.0481
Caudate	RP11-13E1.5	ENSG00000232462.1	sense_intronic	10	1.08	0.000618	0.012
Caudate	FRMPD2	ENSG00000170324.15	protein_coding	10	0.683	0.000172	0.00599
Caudate	LRRC18	ENSG00000165383.6	protein_coding	10	2.34	6.61e-06	0.00106
Caudate	PARG	ENSG00000227345.4	protein_coding	10	-0.145	0.00157	0.0211
Caudate	ASAH2B	ENSG00000204147.5	protein_coding	10	-0.321	0.00456	0.041
Caudate	PRKG1	ENSG00000185532.10	protein_coding	10	0.356	0.000737	0.0134
Caudate	RP11-96B5.3	ENSG00000223502.1	antisense	10	0.716	0.000402	0.0094
Caudate	PCDH15	ENSG00000150275.13	protein_coding	10	0.36	0.00115	0.0177
Caudate	CISD1	ENSG00000122873.7	protein_coding	10	-0.296	1.99e-05	0.00178
Caudate	UBE2D1	ENSG00000072401.10	protein_coding	10	-0.134	0.00285	0.0304
Caudate	C10orf107	ENSG00000183346.6	protein_coding	10	0.584	0.00533	0.0452
Caudate	RTKN2	ENSG00000182010.6	protein_coding	10	-0.452	0.00338	0.034
Caudate	ZNF365	ENSG00000138311.11	protein_coding	10	-0.43	8.93e-05	0.00417
Caudate	ADO	ENSG00000181915.3	protein_coding	10	-0.183	0.00228	0.0265
Caudate	NRBF2	ENSG00000148572.10	protein_coding	10	-0.184	0.000643	0.0123
Caudate	LRRTM3	ENSG00000198739.6	protein_coding	10	-0.457	0.0013	0.0191
Caudate	RP11-119F7.5	ENSG00000260400.1	sense_overlapping	10	0.275	0.00579	0.0473
Caudate	KIAA1279	ENSG00000198954.4	protein_coding	10	-0.137	0.000865	0.0149
Caudate	HKDC1	ENSG00000156510.11	protein_coding	10	0.538	0.000463	0.0102
Caudate	PPA1	ENSG00000180817.7	protein_coding	10	-0.182	0.000923	0.0155
Caudate	NPFFR1	ENSG00000148734.7	protein_coding	10	0.37	0.00396	0.0376
Caudate	PALD1	ENSG00000107719.8	protein_coding	10	0.28	0.0016	0.0213
Caudate	UNC5B-AS1	ENSG00000237512.2	antisense	10	0.462	0.00564	0.0466
Caudate	C10orf105	ENSG00000214688.4	protein_coding	10	0.785	0.00119	0.018
Caudate	ECD	ENSG00000122882.6	protein_coding	10	-0.194	7.9e-05	0.00393
Caudate	RP11-152N13.5	ENSG00000227540.1	antisense	10	0.334	0.000258	0.00743
Caudate	TTC18	ENSG00000156042.13	protein_coding	10	0.851	1.44e-05	0.00152
Caudate	DNAJC9-AS1	ENSG00000236756.4	antisense	10	0.697	0.000257	0.00742
Caudate	PPP3CB	ENSG00000107758.11	protein_coding	10	-0.407	1.11e-05	0.00136
Caudate	RP11-464F9.20	ENSG00000268584.1	antisense	10	0.529	0.00334	0.0337
Caudate	MYOZ1	ENSG00000177791.11	protein_coding	10	0.397	9.32e-05	0.00425
Caudate	CAMK2G	ENSG00000148660.16	protein_coding	10	0.241	0.00028	0.00776
Caudate	VDAC2	ENSG00000165637.9	protein_coding	10	-0.155	1.5e-05	0.00152
Caudate	ZNF503	ENSG00000165655.14	protein_coding	10	-0.224	0.00444	0.0403
Caudate	ZNF503-AS2	ENSG00000237149.4	processed_transcript	10	-0.312	0.0021	0.0252
Caudate	DLG5-AS1	ENSG00000233871.1	antisense	10	0.433	0.00222	0.0262
Caudate	POLR3A	ENSG00000148606.8	protein_coding	10	-0.135	0.00267	0.0292
Caudate	RPS24	ENSG00000138326.14	protein_coding	10	0.139	0.00335	0.0337
Caudate	TMEM254-AS1	ENSG00000230091.2	antisense	10	0.237	0.00284	0.0303
Caudate	MAT1A	ENSG00000151224.8	protein_coding	10	0.885	5e-06	0.000919
Caudate	DYDC2	ENSG00000133665.8	protein_coding	10	0.952	6.22e-05	0.00345
Caudate	GHITM	ENSG00000165678.15	protein_coding	10	-0.181	0.00071	0.0132
Caudate	CDHR1	ENSG00000148600.10	protein_coding	10	-0.463	0.00271	0.0294
Caudate	CCSER2	ENSG00000107771.11	protein_coding	10	-0.168	0.00012	0.00489
Caudate	GLUD1	ENSG00000148672.7	protein_coding	10	0.243	0.00495	0.0432
Caudate	ATAD1	ENSG00000138138.9	protein_coding	10	-0.154	0.00132	0.0193
Caudate	CFL1P1	ENSG00000223820.5	pseudogene	10	-0.253	0.00192	0.0238
Caudate	RP11-236B18.5	ENSG00000273124.1	lincRNA	10	0.604	0.00182	0.023
Caudate	HECTD2	ENSG00000165338.12	protein_coding	10	-0.195	0.00183	0.0231
Caudate	SRP9P1	ENSG00000180581.6	pseudogene	10	0.427	0.00177	0.0226
Caudate	SLC35G1	ENSG00000176273.10	protein_coding	10	-0.276	0.00212	0.0253
Caudate	CC2D2B	ENSG00000188649.7	protein_coding	10	0.371	0.00598	0.0483
Caudate	TLL2	ENSG00000095587.8	protein_coding	10	-0.355	0.00162	0.0215
Caudate	ARHGAP19	ENSG00000213390.6	protein_coding	10	0.188	0.00486	0.0427
Caudate	RRP12	ENSG00000052749.9	protein_coding	10	-0.261	0.00165	0.0217
Caudate	PGAM1	ENSG00000171314.8	protein_coding	10	-0.246	9.05e-06	0.00124
Caudate	HOGA1	ENSG00000241935.4	protein_coding	10	0.396	0.00206	0.0249
Caudate	PI4K2A	ENSG00000155252.12	protein_coding	10	-0.143	0.00334	0.0337
Caudate	CRTAC1	ENSG00000095713.9	protein_coding	10	-0.342	0.00382	0.0368
Caudate	GOT1	ENSG00000120053.9	protein_coding	10	-0.475	1.71e-05	0.00163
Caudate	BLOC1S2	ENSG00000196072.7	protein_coding	10	-0.157	0.00035	0.00869
Caudate	LINC00263	ENSG00000235823.1	processed_transcript	10	0.349	0.000899	0.0152
Caudate	RP11-285F16.1	ENSG00000273030.1	lincRNA	10	0.383	0.00416	0.0387
Caudate	NOLC1	ENSG00000166197.12	protein_coding	10	-0.137	0.000246	0.00733
Caudate	SUFU	ENSG00000107882.7	protein_coding	10	0.149	0.00305	0.0318
Caudate	INA	ENSG00000148798.5	protein_coding	10	-0.448	0.00312	0.0322
Caudate	PDCD11	ENSG00000148843.9	protein_coding	10	-0.12	0.00498	0.0434
Caudate	OBFC1	ENSG00000107960.6	protein_coding	10	-0.153	0.00545	0.0458
Caudate	SLK	ENSG00000065613.9	protein_coding	10	-0.193	0.000931	0.0156
Caudate	WDR96	ENSG00000197748.8	protein_coding	10	1.09	3.96e-06	0.00082
Caudate	GSTO1	ENSG00000148834.8	protein_coding	10	-0.143	0.00379	0.0366
Caudate	CCDC147	ENSG00000120051.10	protein_coding	10	0.923	2.87e-05	0.00218
Caudate	SORCS1	ENSG00000108018.11	protein_coding	10	-0.421	0.00372	0.0361
Caudate	SMNDC1	ENSG00000119953.8	protein_coding	10	-0.15	0.00117	0.0178
Caudate	RBM20	ENSG00000203867.7	protein_coding	10	-0.383	0.00138	0.0197
Caudate	FAM160B1	ENSG00000151553.10	protein_coding	10	-0.163	0.00105	0.0167
Caudate	TRUB1	ENSG00000165832.4	protein_coding	10	-0.24	0.000872	0.0149
Caudate	ATRNL1	ENSG00000107518.12	protein_coding	10	-0.436	0.000463	0.0102
Caudate	HSPA12A	ENSG00000165868.8	protein_coding	10	-0.308	1.2e-05	0.0014
Caudate	ENO4	ENSG00000188316.9	protein_coding	10	0.355	0.00561	0.0465
Caudate	RAB11FIP2	ENSG00000107560.6	protein_coding	10	-0.234	6.18e-05	0.00345
Caudate	CASC2	ENSG00000177640.11	antisense	10	0.247	0.00559	0.0464
Caudate	INPP5F	ENSG00000198825.7	protein_coding	10	-0.418	0.000105	0.00456
Caudate	RP11-572P18.1	ENSG00000220842.5	pseudogene	10	0.349	0.00185	0.0232
Caudate	ATE1	ENSG00000107669.13	protein_coding	10	-0.183	0.00044	0.00986
Caudate	PLEKHA1	ENSG00000107679.10	protein_coding	10	-0.243	0.000628	0.0121
Caudate	C10orf88	ENSG00000119965.8	protein_coding	10	-0.191	0.0029	0.0308
Caudate	CHST15	ENSG00000182022.13	protein_coding	10	-0.377	3.54e-05	0.00246
Caudate	FANK1	ENSG00000203780.6	protein_coding	10	0.708	4.56e-05	0.00287
Caudate	ADAM12	ENSG00000148848.10	protein_coding	10	-0.449	0.000131	0.00512
Caudate	FAM196A	ENSG00000188916.4	protein_coding	10	-0.492	1.44e-05	0.00152
Caudate	LINC00959	ENSG00000237489.2	lincRNA	10	0.234	0.000411	0.00954
Caudate	GLRX3	ENSG00000108010.7	protein_coding	10	-0.163	1.02e-05	0.00129
Caudate	AL450307.1	ENSG00000189275.3	protein_coding	10	2.6	2.66e-06	0.000713
Caudate	PPP2R2D	ENSG00000175470.14	protein_coding	10	-0.142	0.000353	0.00874
Caudate	INPP5A	ENSG00000068383.14	protein_coding	10	-0.577	2.85e-05	0.00217
Caudate	TTC40	ENSG00000171811.8	protein_coding	10	0.758	0.000124	0.00496
Caudate	RP13-137A17.4	ENSG00000232903.2	lincRNA	10	-0.589	0.00187	0.0234
Caudate	RP13-137A17.6	ENSG00000240707.2	lincRNA	10	-0.756	0.000211	0.00668
Caudate	GPR123	ENSG00000197177.11	protein_coding	10	0.306	0.000412	0.00956
Caudate	TNNI2	ENSG00000130598.11	protein_coding	11	1.03	0.000228	0.00703
Caudate	LSP1	ENSG00000130592.9	protein_coding	11	0.521	0.00439	0.0401
Caudate	C11orf21	ENSG00000110665.7	protein_coding	11	0.605	0.00328	0.0333
Caudate	TSPAN32	ENSG00000064201.11	protein_coding	11	0.419	0.00475	0.0421
Caudate	NAP1L4	ENSG00000205531.8	protein_coding	11	0.136	5.94e-06	0.001
Caudate	CARS	ENSG00000110619.12	protein_coding	11	-0.202	0.00144	0.0202
Caudate	TSSC2	ENSG00000223756.2	pseudogene	11	0.511	0.000816	0.0144
Caudate	ART5	ENSG00000167311.9	protein_coding	11	0.718	0.00244	0.0277
Caudate	CNGA4	ENSG00000132259.8	protein_coding	11	0.793	1.49e-05	0.00152
Caudate	ARFIP2	ENSG00000132254.8	protein_coding	11	-0.106	0.00525	0.0448
Caudate	STK33	ENSG00000130413.11	protein_coding	11	0.466	0.00012	0.00489
Caudate	C11orf16	ENSG00000176029.9	protein_coding	11	1.41	0.00341	0.0341
Caudate	NRIP3	ENSG00000175352.6	protein_coding	11	-0.461	0.000985	0.016
Caudate	RP11-467K18.2	ENSG00000253973.2	antisense	11	-0.693	0.000567	0.0115
Caudate	SCUBE2	ENSG00000175356.8	protein_coding	11	0.316	0.000118	0.00485
Caudate	SBF2-AS1	ENSG00000246273.2	antisense	11	-0.219	0.00257	0.0286
Caudate	ZBED5-AS1	ENSG00000247271.2	antisense	11	0.22	0.00186	0.0233
Caudate	USP47	ENSG00000170242.13	protein_coding	11	-0.115	0.00554	0.0463
Caudate	DKK3	ENSG00000050165.13	protein_coding	11	-0.356	0.000607	0.0119
Caudate	ARNTL	ENSG00000133794.13	protein_coding	11	-0.265	0.000767	0.0138
Caudate	BTBD10	ENSG00000148925.6	protein_coding	11	-0.37	5.98e-05	0.00344
Caudate	PSMA1	ENSG00000129084.13	protein_coding	11	-0.176	1.77e-05	0.00165
Caudate	RP11-396O20.2	ENSG00000254645.1	lincRNA	11	0.887	0.000293	0.00792
Caudate	SOX6	ENSG00000110693.11	protein_coding	11	0.256	0.00102	0.0164
Caudate	C11orf58	ENSG00000110696.5	protein_coding	11	-0.111	0.00319	0.0327
Caudate	PIK3C2A	ENSG00000011405.9	protein_coding	11	0.314	0.00186	0.0234
Caudate	KCNC1	ENSG00000129159.6	protein_coding	11	-0.411	0.0057	0.0468
Caudate	LDHA	ENSG00000134333.9	protein_coding	11	-0.405	8.85e-07	0.000476
Caudate	SPTY2D1-AS1	ENSG00000247595.2	processed_transcript	11	0.305	0.0025	0.0282
Caudate	PTPN5	ENSG00000110786.13	protein_coding	11	-0.492	0.00229	0.0266
Caudate	ZDHHC13	ENSG00000177054.9	protein_coding	11	-0.112	0.00564	0.0466
Caudate	RP11-359E10.1	ENSG00000270607.1	lincRNA	11	-0.383	0.00104	0.0166
Caudate	ANO3	ENSG00000134343.8	protein_coding	11	-0.61	0.000661	0.0126
Caudate	BBOX1	ENSG00000129151.4	protein_coding	11	0.369	0.00123	0.0185
Caudate	BDNF-AS	ENSG00000245573.3	antisense	11	0.168	0.00309	0.032
Caudate	ARL14EP	ENSG00000152219.4	protein_coding	11	-0.139	0.00594	0.048
Caudate	MPPED2	ENSG00000066382.12	protein_coding	11	-0.305	0.0019	0.0237
Caudate	DCDC1	ENSG00000170959.10	protein_coding	11	1.04	3.78e-06	0.000809
Caudate	PAX6	ENSG00000007372.16	protein_coding	11	0.241	0.00444	0.0403
Caudate	RCN1	ENSG00000049449.4	protein_coding	11	-0.25	4.03e-05	0.00265
Caudate	WT1	ENSG00000184937.8	protein_coding	11	-0.607	0.00352	0.0348
Caudate	EIF3M	ENSG00000149100.8	protein_coding	11	-0.13	0.000334	0.00849
Caudate	KIAA1549L	ENSG00000110427.10	protein_coding	11	-0.519	0.000278	0.00775
Caudate	CAPRIN1	ENSG00000135387.15	protein_coding	11	-0.112	0.00152	0.0207
Caudate	PDHX	ENSG00000110435.7	protein_coding	11	-0.222	6.54e-06	0.00106
Caudate	API5	ENSG00000166181.8	protein_coding	11	-0.162	1.58e-05	0.00155
Caudate	CREB3L1	ENSG00000157613.6	protein_coding	11	0.378	0.000504	0.0107
Caudate	CHRM4	ENSG00000180720.6	protein_coding	11	-0.761	0.000258	0.00743
Caudate	PSMC3	ENSG00000165916.4	protein_coding	11	-0.173	0.0034	0.0341
Caudate	AGBL2	ENSG00000165923.11	protein_coding	11	1.3	1.15e-06	0.00048
Caudate	RP11-163O19.1	ENSG00000254714.1	pseudogene	11	-0.755	0.00205	0.0248
Caudate	AP001258.4	ENSG00000245571.2	lincRNA	11	0.29	0.00273	0.0296
Caudate	FAM111A	ENSG00000166801.11	protein_coding	11	0.311	0.000328	0.00839
Caudate	CCDC86	ENSG00000110104.7	protein_coding	11	-0.196	0.00201	0.0245
Caudate	PTGDR2	ENSG00000183134.4	protein_coding	11	0.426	0.00391	0.0372
Caudate	PRPF19	ENSG00000110107.4	protein_coding	11	-0.192	0.000316	0.00828
Caudate	VWCE	ENSG00000167992.8	protein_coding	11	0.461	0.00394	0.0374
Caudate	CYB561A3	ENSG00000162144.5	protein_coding	11	0.202	0.0032	0.0328
Caudate	TMEM138	ENSG00000149483.7	protein_coding	11	0.222	0.00102	0.0164
Caudate	PPP1R32	ENSG00000162148.6	protein_coding	11	0.628	0.000366	0.00895
Caudate	RP11-286N22.10	ENSG00000255931.1	lincRNA	11	-0.707	0.000284	0.00781
Caudate	AHNAK	ENSG00000124942.9	protein_coding	11	0.344	0.000401	0.00938
Caudate	GNG3	ENSG00000162188.5	protein_coding	11	-0.385	0.00559	0.0464
Caudate	ZBTB3	ENSG00000185670.7	protein_coding	11	0.191	0.00278	0.0299
Caudate	RP11-727F15.13	ENSG00000269463.1	sense_intronic	11	0.451	0.000542	0.0112
Caudate	WDR74	ENSG00000133316.11	protein_coding	11	-0.17	0.00547	0.0458
Caudate	RTN3	ENSG00000133318.9	protein_coding	11	-0.231	0.000721	0.0133
Caudate	RP11-783K16.14	ENSG00000256116.1	antisense	11	0.246	0.00417	0.0388
Caudate	RP11-783K16.13	ENSG00000257086.1	lincRNA	11	0.586	0.003	0.0314
Caudate	PLCB3	ENSG00000149782.7	protein_coding	11	0.336	0.000963	0.0159
Caudate	CCDC88B	ENSG00000168071.17	protein_coding	11	0.265	0.00461	0.0412
Caudate	RASGRP2	ENSG00000068831.14	protein_coding	11	-0.411	0.000961	0.0159
Caudate	TIGD3	ENSG00000173825.6	protein_coding	11	-0.317	0.00378	0.0365
Caudate	SCYL1	ENSG00000142186.12	protein_coding	11	-0.105	0.00558	0.0464
Caudate	EFEMP2	ENSG00000172638.8	protein_coding	11	0.226	0.00511	0.0441
Caudate	KLC2	ENSG00000174996.7	protein_coding	11	-0.263	0.00241	0.0275
Caudate	B3GNT1	ENSG00000174684.6	protein_coding	11	-0.242	0.00265	0.029
Caudate	RBM4B	ENSG00000173914.7	protein_coding	11	0.177	0.000508	0.0108
Caudate	CTC-1337H24.1	ENSG00000269913.1	lincRNA	11	0.499	0.00508	0.0439
Caudate	ALDH3B1	ENSG00000006534.11	protein_coding	11	0.331	0.00163	0.0216
Caudate	MTL5	ENSG00000132749.6	protein_coding	11	-0.559	0.0016	0.0213
Caudate	RP11-757G1.6	ENSG00000250508.1	lincRNA	11	0.586	0.00278	0.0299
Caudate	LRTOMT	ENSG00000184154.8	protein_coding	11	0.33	0.000914	0.0154
Caudate	FOLR1	ENSG00000110195.7	protein_coding	11	0.964	0.000193	0.00633
Caudate	PDE2A	ENSG00000186642.11	protein_coding	11	-0.385	0.00253	0.0284
Caudate	RELT	ENSG00000054967.8	protein_coding	11	-0.227	0.00261	0.0288
Caudate	RP11-809N8.5	ENSG00000256148.1	pseudogene	11	0.747	0.00181	0.0229
Caudate	RAB6A	ENSG00000175582.15	protein_coding	11	-0.249	5.72e-05	0.00336
Caudate	DNAJB13	ENSG00000187726.4	protein_coding	11	0.885	0.000131	0.00513
Caudate	RP11-167N4.2	ENSG00000255847.1	antisense	11	1.72	6.19e-08	0.000136
Caudate	PPME1	ENSG00000214517.4	protein_coding	11	-0.239	0.000599	0.0118
Caudate	PGM2L1	ENSG00000165434.6	protein_coding	11	-0.369	0.00535	0.0454
Caudate	CHRDL2	ENSG00000054938.11	protein_coding	11	-0.516	0.00166	0.0218
Caudate	ARRB1	ENSG00000137486.12	protein_coding	11	0.226	0.00436	0.0398
Caudate	DGAT2	ENSG00000062282.10	protein_coding	11	-0.482	0.000849	0.0147
Caudate	PAK1	ENSG00000149269.5	protein_coding	11	-0.328	0.000444	0.00991
Caudate	CLNS1A	ENSG00000074201.4	protein_coding	11	0.13	0.00233	0.0269
Caudate	AQP11	ENSG00000178301.3	protein_coding	11	-0.199	0.00032	0.00832
Caudate	NDUFC2	ENSG00000151366.8	protein_coding	11	-0.139	0.00226	0.0264
Caudate	RP11-179A16.1	ENSG00000245832.2	lincRNA	11	1.07	0.000499	0.0107
Caudate	CCDC89	ENSG00000179071.3	protein_coding	11	0.513	0.0035	0.0347
Caudate	CCDC81	ENSG00000149201.5	protein_coding	11	0.932	0.000144	0.00545
Caudate	ME3	ENSG00000151376.12	protein_coding	11	-0.353	0.00139	0.0197
Caudate	GRM5	ENSG00000168959.10	protein_coding	11	-0.688	0.000961	0.0159
Caudate	CCDC67	ENSG00000165325.9	protein_coding	11	1.66	5.03e-05	0.00309
Caudate	PANX1	ENSG00000110218.4	protein_coding	11	-0.315	1.23e-05	0.00142
Caudate	GPR83	ENSG00000123901.4	protein_coding	11	-0.517	0.000917	0.0154
Caudate	CNTN5	ENSG00000149972.6	protein_coding	11	-0.551	0.00223	0.0262
Caudate	TMEM133	ENSG00000170647.2	protein_coding	11	0.278	0.005	0.0435
Caudate	C11orf70	ENSG00000137691.8	protein_coding	11	1.08	1.77e-05	0.00165
Caudate	RP11-315O6.1	ENSG00000255337.1	antisense	11	0.431	0.000419	0.00961
Caudate	DCUN1D5	ENSG00000137692.7	protein_coding	11	-0.221	1.39e-05	0.00152
Caudate	PDGFD	ENSG00000170962.8	protein_coding	11	-0.59	0.000137	0.00528
Caudate	AASDHPPT	ENSG00000149313.6	protein_coding	11	-0.318	0.000141	0.00538
Caudate	GUCY1A2	ENSG00000152402.6	protein_coding	11	-0.446	0.000195	0.00635
Caudate	ELMOD1	ENSG00000110675.8	protein_coding	11	-0.641	1.59e-05	0.00155
Caudate	DDX10	ENSG00000178105.5	protein_coding	11	-0.186	0.0026	0.0288
Caudate	C11orf87	ENSG00000185742.6	protein_coding	11	-0.774	2.94e-05	0.0022
Caudate	ARHGAP20	ENSG00000137727.8	protein_coding	11	-0.635	2.98e-05	0.00221
Caudate	COLCA1	ENSG00000196167.5	protein_coding	11	0.455	0.00486	0.0427
Caudate	C11orf88	ENSG00000183644.9	protein_coding	11	2.22	8.23e-07	0.000457
Caudate	ALG9	ENSG00000086848.10	protein_coding	11	-0.14	0.0049	0.043
Caudate	DLAT	ENSG00000150768.11	protein_coding	11	-0.189	0.000149	0.00555
Caudate	ANKK1	ENSG00000170209.4	protein_coding	11	0.47	0.00175	0.0224
Caudate	ZW10	ENSG00000086827.4	protein_coding	11	-0.124	0.00451	0.0407
Caudate	HTR3A	ENSG00000166736.7	protein_coding	11	-0.59	0.00262	0.0288
Caudate	SIK3	ENSG00000160584.11	protein_coding	11	-0.174	0.00251	0.0282
Caudate	SCN4B	ENSG00000177098.4	protein_coding	11	-0.712	0.000116	0.00483
Caudate	SCN2B	ENSG00000149575.5	protein_coding	11	-0.563	0.000568	0.0115
Caudate	ATP5L	ENSG00000167283.3	protein_coding	11	-0.142	0.00527	0.0449
Caudate	RPL5P30	ENSG00000243431.1	pseudogene	11	0.338	0.00108	0.017
Caudate	ARCN1	ENSG00000095139.9	protein_coding	11	-0.116	0.000884	0.015
Caudate	RP11-110I1.12	ENSG00000255121.2	lincRNA	11	0.342	0.00555	0.0463
Caudate	SLC37A4	ENSG00000137700.12	protein_coding	11	0.161	0.00134	0.0195
Caudate	HYOU1	ENSG00000149428.14	protein_coding	11	-0.289	4.81e-05	0.00298
Caudate	C2CD2L	ENSG00000172375.8	protein_coding	11	-0.322	0.00366	0.0358
Caudate	PDZD3	ENSG00000172367.11	protein_coding	11	0.853	0.00491	0.043
Caudate	CCDC153	ENSG00000248712.3	protein_coding	11	1.15	9.3e-06	0.00124
Caudate	C1QTNF5	ENSG00000223953.3	protein_coding	11	0.323	0.00621	0.0495
Caudate	MFRP	ENSG00000235718.3	protein_coding	11	1.18	0.00279	0.03
Caudate	THY1	ENSG00000154096.9	protein_coding	11	-0.382	0.00624	0.0497
Caudate	UBASH3B	ENSG00000154127.5	protein_coding	11	-0.583	7.07e-05	0.0037
Caudate	SCN3B	ENSG00000166257.4	protein_coding	11	-0.427	0.00472	0.0419
Caudate	TBRG1	ENSG00000154144.8	protein_coding	11	-0.306	0.000535	0.0111
Caudate	SPA17	ENSG00000064199.2	protein_coding	11	0.329	0.00588	0.0478
Caudate	NRGN	ENSG00000154146.8	protein_coding	11	-0.502	0.00122	0.0184
Caudate	VSIG2	ENSG00000019102.7	protein_coding	11	-0.364	0.0015	0.0205
Caudate	SLC37A2	ENSG00000134955.7	protein_coding	11	0.523	0.002	0.0245
Caudate	AP001007.1	ENSG00000203306.3	pseudogene	11	0.55	7.92e-05	0.00393
Caudate	EI24	ENSG00000149547.10	protein_coding	11	-0.129	2.58e-05	0.00206
Caudate	PATE2	ENSG00000196844.4	protein_coding	11	-0.742	0.00629	0.05
Caudate	SRPR	ENSG00000182934.7	protein_coding	11	-0.165	0.000121	0.00489
Caudate	KCNJ5	ENSG00000120457.7	protein_coding	11	0.544	0.0016	0.0213
Caudate	NTM	ENSG00000182667.10	protein_coding	11	0.145	0.0033	0.0334
Caudate	OPCML	ENSG00000183715.9	protein_coding	11	-0.455	0.00029	0.00788
Caudate	LRTM2	ENSG00000166159.6	protein_coding	12	-0.497	0.00323	0.033
Caudate	RP5-1063M23.1	ENSG00000250770.2	lincRNA	12	-0.817	7.37e-05	0.00378
Caudate	PRMT8	ENSG00000111218.7	protein_coding	12	-0.484	0.0054	0.0456
Caudate	NDUFA9	ENSG00000139180.6	protein_coding	12	-0.121	0.000527	0.011
Caudate	KCNA1	ENSG00000111262.4	protein_coding	12	-0.571	0.000294	0.00792
Caudate	VAMP1	ENSG00000139190.12	protein_coding	12	-0.199	0.00594	0.048
Caudate	MLF2	ENSG00000089693.6	protein_coding	12	-0.173	0.006	0.0484
Caudate	USP5	ENSG00000111667.9	protein_coding	12	-0.153	0.00347	0.0346
Caudate	TPI1	ENSG00000111669.10	protein_coding	12	-0.152	0.00547	0.0458
Caudate	LRRC23	ENSG00000010626.10	protein_coding	12	0.454	5.23e-05	0.00318
Caudate	ENO2	ENSG00000111674.4	protein_coding	12	-0.373	0.000861	0.0148
Caudate	CLSTN3	ENSG00000139182.9	protein_coding	12	-0.486	0.00109	0.0171
Caudate	NECAP1	ENSG00000089818.12	protein_coding	12	-0.329	0.000207	0.00659
Caudate	CLEC4A	ENSG00000111729.8	protein_coding	12	0.275	0.00306	0.0318
Caudate	A2ML1	ENSG00000166535.15	protein_coding	12	0.436	0.000289	0.00787
Caudate	GABARAPL1	ENSG00000139112.6	protein_coding	12	-0.414	9.76e-05	0.00436
Caudate	LOH12CR2	ENSG00000205791.2	protein_coding	12	0.173	0.00262	0.0288
Caudate	GRIN2B	ENSG00000273079.1	protein_coding	12	-0.522	0.00163	0.0216
Caudate	WBP11	ENSG00000084463.3	protein_coding	12	-0.131	0.00122	0.0184
Caudate	RERG	ENSG00000134533.2	protein_coding	12	-0.295	0.00185	0.0232
Caudate	PTPRO	ENSG00000151490.9	protein_coding	12	-0.44	0.00294	0.0311
Caudate	STRAP	ENSG00000023734.6	protein_coding	12	-0.137	7.79e-05	0.00388
Caudate	GOLT1B	ENSG00000111711.5	protein_coding	12	-0.281	1.06e-05	0.00131
Caudate	CMAS	ENSG00000111726.8	protein_coding	12	-0.162	0.00133	0.0194
Caudate	ETNK1	ENSG00000139163.11	protein_coding	12	-0.187	0.000836	0.0146
Caudate	BCAT1	ENSG00000060982.10	protein_coding	12	-0.483	1.69e-06	0.000528
Caudate	CASC1	ENSG00000118307.14	protein_coding	12	0.602	0.00118	0.0179
Caudate	IFLTD1	ENSG00000152936.6	protein_coding	12	1.09	8.47e-05	0.00402
Caudate	RASSF8-AS1	ENSG00000246695.3	antisense	12	0.29	2.62e-05	0.00208
Caudate	MRPS35	ENSG00000061794.8	protein_coding	12	-0.16	1.38e-06	0.000501
Caudate	KLHL42	ENSG00000087448.5	protein_coding	12	-0.181	0.000872	0.0149
Caudate	PTHLH	ENSG00000087494.11	protein_coding	12	-0.683	0.000224	0.00695
Caudate	FAR2	ENSG00000064763.6	protein_coding	12	-0.485	9.03e-05	0.00419
Caudate	ERGIC2	ENSG00000087502.13	protein_coding	12	-0.108	0.0037	0.036
Caudate	TMTC1	ENSG00000133687.11	protein_coding	12	-0.324	1.26e-05	0.00144
Caudate	DENND5B	ENSG00000170456.10	protein_coding	12	-0.199	0.00332	0.0336
Caudate	AMN1	ENSG00000151743.6	protein_coding	12	-0.252	0.000242	0.00732
Caudate	DNM1L	ENSG00000087470.13	protein_coding	12	-0.186	0.00612	0.049
Caudate	YARS2	ENSG00000139131.8	protein_coding	12	-0.162	0.0041	0.0384
Caudate	PKP2	ENSG00000057294.9	protein_coding	12	-0.498	0.00187	0.0235
Caudate	SLC2A13	ENSG00000151229.8	protein_coding	12	-0.513	9.27e-05	0.00424
Caudate	PDZRN4	ENSG00000165966.10	protein_coding	12	0.33	0.000163	0.00577
Caudate	PPHLN1	ENSG00000134283.13	protein_coding	12	-0.106	0.00546	0.0458
Caudate	SLC38A1	ENSG00000111371.11	protein_coding	12	-0.305	0.00234	0.0269
Caudate	PCED1B	ENSG00000179715.8	protein_coding	12	0.45	6.58e-05	0.00356
Caudate	RP11-493L12.6	ENSG00000258116.1	pseudogene	12	2.6	1.87e-05	0.00171
Caudate	CCDC65	ENSG00000139537.6	protein_coding	12	0.428	0.00102	0.0164
Caudate	TUBA1B	ENSG00000123416.11	protein_coding	12	-0.231	0.000946	0.0157
Caudate	TUBA1A	ENSG00000167552.9	protein_coding	12	-0.251	0.000398	0.00938
Caudate	C1QL4	ENSG00000186897.3	protein_coding	12	0.777	0.00503	0.0438
Caudate	SPATS2	ENSG00000123352.13	protein_coding	12	-0.176	0.000424	0.00968
Caudate	FMNL3	ENSG00000161791.9	protein_coding	12	0.25	0.00175	0.0224
Caudate	CSRNP2	ENSG00000110925.2	protein_coding	12	-0.164	0.00182	0.023
Caudate	SCN8A	ENSG00000196876.9	protein_coding	12	-0.629	0.000185	0.00622
Caudate	ACVR1B	ENSG00000135503.8	protein_coding	12	-0.205	2.95e-05	0.0022
Caudate	C12orf44	ENSG00000123395.10	protein_coding	12	-0.233	0.00183	0.023
Caudate	TESPA1	ENSG00000135426.10	protein_coding	12	-1.16	5.77e-06	0.000983
Caudate	TMEM198B	ENSG00000182796.8	pseudogene	12	0.228	0.00135	0.0195
Caudate	PMEL	ENSG00000185664.10	protein_coding	12	0.535	0.00561	0.0465
Caudate	PA2G4	ENSG00000170515.9	protein_coding	12	-0.0882	0.00255	0.0285
Caudate	RP11-977G19.5	ENSG00000258199.1	sense_overlapping	12	0.224	0.00155	0.0209
Caudate	RNF41	ENSG00000181852.13	protein_coding	12	-0.212	0.00112	0.0174
Caudate	CS	ENSG00000062485.14	protein_coding	12	-0.156	0.000154	0.00561
Caudate	ATP5B	ENSG00000110955.4	protein_coding	12	-0.213	6.9e-05	0.00364
Caudate	INHBE	ENSG00000139269.2	protein_coding	12	0.8	7.41e-05	0.00379
Caudate	GLI1	ENSG00000111087.5	protein_coding	12	1.47	6.15e-08	0.000136
Caudate	MARS	ENSG00000166986.8	protein_coding	12	-0.171	0.00341	0.0341
Caudate	DCTN2	ENSG00000175203.11	protein_coding	12	-0.119	0.00167	0.0218
Caudate	PIP4K2C	ENSG00000166908.13	protein_coding	12	-0.152	0.00329	0.0334
Caudate	B4GALNT1	ENSG00000135454.9	protein_coding	12	-0.409	0.00145	0.0202
Caudate	METTL1	ENSG00000037897.12	protein_coding	12	-0.243	0.00254	0.0284
Caudate	USP15	ENSG00000135655.9	protein_coding	12	-0.144	0.00257	0.0286
Caudate	TBC1D30	ENSG00000111490.8	protein_coding	12	-0.325	0.000955	0.0158
Caudate	LEMD3	ENSG00000174106.2	protein_coding	12	-0.161	0.00127	0.0189
Caudate	GRIP1	ENSG00000155974.7	protein_coding	12	-0.638	9.28e-06	0.00124
Caudate	CCT2	ENSG00000166226.8	protein_coding	12	-0.178	0.00061	0.0119
Caudate	PTPRR	ENSG00000153233.8	protein_coding	12	-0.579	0.00155	0.021
Caudate	RAB21	ENSG00000080371.4	protein_coding	12	-0.122	0.0043	0.0396
Caudate	TRHDE	ENSG00000072657.4	protein_coding	12	-0.619	0.00253	0.0283
Caudate	OSBPL8	ENSG00000091039.12	protein_coding	12	-0.318	0.000559	0.0114
Caudate	E2F7	ENSG00000165891.11	protein_coding	12	0.773	0.00473	0.042
Caudate	SYT1	ENSG00000067715.9	protein_coding	12	-0.623	0.000984	0.016
Caudate	LRRIQ1	ENSG00000133640.14	protein_coding	12	0.769	0.000544	0.0112
Caudate	RP11-193M21.1	ENSG00000269916.1	lincRNA	12	0.938	0.000285	0.00782
Caudate	RASSF9	ENSG00000198774.3	protein_coding	12	0.979	0.00552	0.0461
Caudate	NTS	ENSG00000133636.6	protein_coding	12	1.51	6.2e-05	0.00345
Caudate	ATP2B1	ENSG00000070961.10	protein_coding	12	-0.543	0.000176	0.0061
Caudate	LINC00936	ENSG00000271614.1	lincRNA	12	-0.467	0.00171	0.0222
Caudate	RP11-693J15.5	ENSG00000205056.8	lincRNA	12	0.863	0.00546	0.0458
Caudate	NUDT4	ENSG00000173598.9	protein_coding	12	-0.239	0.00325	0.0331
Caudate	UBE2N	ENSG00000177889.5	protein_coding	12	-0.16	0.000196	0.00636
Caudate	CDK17	ENSG00000059758.3	protein_coding	12	-0.324	0.000117	0.00485
Caudate	C12orf55	ENSG00000188596.5	protein_coding	12	0.892	7.43e-05	0.00379
Caudate	RMST	ENSG00000255794.2	processed_transcript	12	0.512	0.000857	0.0148
Caudate	SLC9A7P1	ENSG00000227825.3	pseudogene	12	-0.5	3.35e-05	0.00236
Caudate	UHRF1BP1L	ENSG00000111647.8	protein_coding	12	-0.247	4.08e-05	0.00266
Caudate	GOLGA2B	ENSG00000238105.3	pseudogene	12	0.723	5.74e-07	0.000372
Caudate	RP11-175P13.3	ENSG00000257489.2	pseudogene	12	0.691	0.000711	0.0132
Caudate	NR1H4	ENSG00000012504.9	protein_coding	12	1.78	0.000169	0.00593
Caudate	ARL1	ENSG00000120805.9	protein_coding	12	-0.167	0.000221	0.00691
Caudate	MYBPC1	ENSG00000196091.8	protein_coding	12	0.65	3.55e-07	0.00036
Caudate	ASCL1	ENSG00000139352.3	protein_coding	12	0.453	0.000134	0.00517
Caudate	RP11-328J6.1	ENSG00000257703.1	antisense	12	0.627	0.00258	0.0287
Caudate	NT5DC3	ENSG00000111696.7	protein_coding	12	-0.269	0.000544	0.0112
Caudate	HSP90B1	ENSG00000166598.8	protein_coding	12	-0.27	0.000469	0.0103
Caudate	C12orf73	ENSG00000204954.5	protein_coding	12	-0.167	0.00134	0.0195
Caudate	RP11-482D24.3	ENSG00000257918.1	antisense	12	-0.514	0.000312	0.00823
Caudate	RIC8B	ENSG00000111785.14	protein_coding	12	-0.333	0.000362	0.00887
Caudate	WSCD2	ENSG00000075035.5	protein_coding	12	-0.528	0.00209	0.0251
Caudate	SELPLG	ENSG00000110876.8	protein_coding	12	0.647	0.000315	0.00828
Caudate	SVOP	ENSG00000166111.5	protein_coding	12	-0.577	0.0027	0.0293
Caudate	ATP2A2	ENSG00000174437.12	protein_coding	12	-0.358	1.09e-06	0.000476
Caudate	ANAPC7	ENSG00000196510.8	protein_coding	12	-0.134	0.0041	0.0383
Caudate	ARPC3	ENSG00000111229.11	protein_coding	12	-0.112	0.00269	0.0293
Caudate	FAM216A	ENSG00000204856.7	protein_coding	12	-0.31	0.00133	0.0194
Caudate	VPS29	ENSG00000111237.14	protein_coding	12	-0.108	0.00281	0.0301
Caudate	RAD9B	ENSG00000151164.14	protein_coding	12	0.404	0.00136	0.0196
Caudate	PPTC7	ENSG00000196850.4	protein_coding	12	-0.195	0.00282	0.0301
Caudate	RP1-46F2.3	ENSG00000258240.1	lincRNA	12	-0.585	0.00227	0.0265
Caudate	MAPKAPK5-AS1	ENSG00000234608.3	lincRNA	12	-0.247	3.35e-05	0.00236
Caudate	NAA25	ENSG00000111300.5	protein_coding	12	-0.225	0.000743	0.0135
Caudate	CCDC42B	ENSG00000186710.7	protein_coding	12	1.93	5.25e-07	0.00036
Caudate	Y_RNA	ENSG00000199899.1	misc_RNA	12	1.79	0.000128	0.00504
Caudate	IQCD	ENSG00000166578.5	protein_coding	12	0.51	0.000725	0.0134
Caudate	TESC	ENSG00000088992.13	protein_coding	12	-0.496	0.000179	0.00615
Caudate	NOS1	ENSG00000089250.14	protein_coding	12	-0.35	0.00232	0.0268
Caudate	WSB2	ENSG00000176871.4	protein_coding	12	-0.182	0.000754	0.0137
Caudate	RP11-131L12.2	ENSG00000270482.1	lincRNA	12	0.533	0.00474	0.042
Caudate	RP11-64B16.4	ENSG00000256609.1	antisense	12	1.32	0.000732	0.0134
Caudate	CCDC60	ENSG00000183273.2	protein_coding	12	2.42	7.93e-06	0.00115
Caudate	MSI1	ENSG00000135097.2	protein_coding	12	0.362	0.00113	0.0175
Caudate	RPS27P25	ENSG00000239881.1	pseudogene	12	0.807	6.15e-06	0.00101
Caudate	TRIAP1	ENSG00000170855.3	protein_coding	12	-0.159	0.000513	0.0108
Caudate	RNF10	ENSG00000022840.11	protein_coding	12	-0.127	5.61e-05	0.00336
Caudate	POP5	ENSG00000167272.6	protein_coding	12	0.16	0.00387	0.037
Caudate	UNC119B	ENSG00000175970.7	protein_coding	12	0.235	0.00534	0.0453
Caudate	CAMKK2	ENSG00000110931.14	protein_coding	12	-0.358	0.00504	0.0438
Caudate	WDR66	ENSG00000158023.5	protein_coding	12	0.575	1.03e-05	0.00129
Caudate	VPS33A	ENSG00000139719.5	protein_coding	12	-0.0938	0.00141	0.02
Caudate	SNRNP35	ENSG00000184209.14	protein_coding	12	0.161	0.00578	0.0473
Caudate	TMED2	ENSG00000086598.6	protein_coding	12	-0.14	0.00076	0.0137
Caudate	EIF2B1	ENSG00000111361.8	protein_coding	12	-0.0976	0.0016	0.0214
Caudate	DNAH10	ENSG00000197653.10	protein_coding	12	0.913	3.66e-06	0.000803
Caudate	GLT1D1	ENSG00000151948.7	protein_coding	12	-0.479	0.00103	0.0165
Caudate	STX2	ENSG00000111450.9	protein_coding	12	0.2	0.000741	0.0135
Caudate	RAN	ENSG00000132341.7	protein_coding	12	-0.14	0.000107	0.00461
Caudate	PGAM5	ENSG00000247077.2	protein_coding	12	-0.212	0.000256	0.00741
Caudate	ANKLE2	ENSG00000176915.10	protein_coding	12	-0.148	0.000983	0.016
Caudate	PSPC1	ENSG00000121390.13	protein_coding	13	-0.183	0.00259	0.0288
Caudate	CRYL1	ENSG00000165475.9	protein_coding	13	0.23	0.000621	0.012
Caudate	SKA3	ENSG00000165480.11	protein_coding	13	-0.45	0.0029	0.0308
Caudate	SACS	ENSG00000151835.9	protein_coding	13	-0.311	0.000298	0.00801
Caudate	SPATA13	ENSG00000182957.11	protein_coding	13	-0.176	0.00283	0.0303
Caudate	RNF17	ENSG00000132972.14	protein_coding	13	-1.34	0.000649	0.0124
Caudate	MTMR6	ENSG00000139505.10	protein_coding	13	-0.242	0.000222	0.00693
Caudate	NUPL1	ENSG00000139496.11	protein_coding	13	-0.158	0.00207	0.025
Caudate	ATP8A2	ENSG00000132932.12	protein_coding	13	-0.447	0.00214	0.0255
Caudate	RNF6	ENSG00000127870.12	protein_coding	13	-0.209	0.00056	0.0114
Caudate	GPR12	ENSG00000132975.6	protein_coding	13	-0.483	0.00229	0.0266
Caudate	GSX1	ENSG00000169840.4	protein_coding	13	0.984	0.000188	0.00626
Caudate	MTUS2	ENSG00000132938.14	protein_coding	13	-0.665	8.89e-05	0.00416
Caudate	UBL3	ENSG00000122042.9	protein_coding	13	-0.151	0.00547	0.0458
[truncated: 1,437 more rows]
