# Supplementary material for: Comprehensive transcriptomic analysis indicates brain regional specific alterations in type 2 diabetes
Source: Aging (Albany NY). 2019 Aug 26;11(16):6398–421. doi: 10.18632/aging.102196 (PMC6738403; doi:10.18632/aging.102196)
Supplement: Supplementary Table 3 [file aging-11-102196-s004.xlsx]

## Sheet: Sheet1
Supplementary Table 3. Functional annotations of DAGs
Region	Regulation	Category	ID	Description	Count	P-value	FDR
caudate	up	GO BP term	GO:0003341	cilium movement	36	6.8054e-37	2.93585e-33
caudate	up	GO BP term	GO:0044782	cilium organization	73	2.22494e-34	4.79919e-31
caudate	up	GO BP term	GO:0035082	axoneme assembly	32	2.68791e-31	3.64364e-28
caudate	up	GO BP term	GO:0060271	cilium assembly	68	3.37843e-31	3.64364e-28
caudate	up	GO BP term	GO:0007018	microtubule-based movement	54	4.90526e-27	4.23226e-24
caudate	up	GO BP term	GO:0001578	microtubule bundle formation	33	2.04747e-26	1.47213e-23
caudate	up	GO BP term	GO:0070286	axonemal dynein complex assembly	17	8.34494e-18	5.14287e-15
caudate	up	GO BP term	GO:0007368	determination of left/right symmetry	24	3.57329e-13	1.9269e-10
caudate	up	GO BP term	GO:0001539	cilium or flagellum-dependent cell motility	14	9.96956e-13	4.30087e-10
caudate	up	GO BP term	GO:0060285	cilium-dependent cell motility	14	9.96956e-13	4.30087e-10
caudate	up	GO BP term	GO:0009855	determination of bilateral symmetry	24	2.22567e-12	8.72867e-10
caudate	up	GO BP term	GO:0009799	specification of symmetry	24	2.64576e-12	9.51151e-10
caudate	up	GO BP term	GO:0007389	pattern specification process	44	7.13453e-11	2.36757e-08
caudate	up	GO BP term	GO:0003352	regulation of cilium movement	8	4.80229e-09	1.36524e-06
caudate	up	GO BP term	GO:0030317	flagellated sperm motility	17	5.06347e-09	1.36524e-06
caudate	up	GO BP term	GO:0097722	sperm motility	17	5.06347e-09	1.36524e-06
caudate	up	GO BP term	GO:0003351	epithelial cilium movement	9	2.41079e-08	5.77785e-06
caudate	up	GO BP term	GO:0044458	motile cilium assembly	9	2.41079e-08	5.77785e-06
caudate	up	GO BP term	GO:0036158	outer dynein arm assembly	8	3.00339e-08	6.81927e-06
caudate	up	GO BP term	GO:0007224	smoothened signaling pathway	19	5.23575e-08	1.12935e-05
caudate	up	GO BP term	GO:0060294	cilium movement involved in cell motility	8	8.1773e-08	1.67985e-05
caudate	up	GO BP term	GO:0016331	morphogenesis of embryonic epithelium	20	1.24827e-07	2.44774e-05
caudate	up	GO BP term	GO:0036159	inner dynein arm assembly	7	1.50773e-07	2.82797e-05
caudate	up	GO BP term	GO:0021915	neural tube development	20	3.11642e-07	5.60176e-05
caudate	up	GO BP term	GO:0030324	lung development	21	3.59142e-07	6.19736e-05
caudate	up	GO BP term	GO:0030323	respiratory tube development	21	5.15093e-07	8.54658e-05
caudate	up	GO BP term	GO:0060632	regulation of microtubule-based movement	8	8.58155e-07	0.000137114
caudate	up	GO BP term	GO:0001838	embryonic epithelial tube formation	17	9.50575e-07	0.000146357
caudate	up	GO BP term	GO:0060541	respiratory system development	22	9.83859e-07	0.000146357
caudate	up	GO BP term	GO:0035148	tube formation	18	1.8947e-06	0.000272458
caudate	up	GO BP term	GO:0072175	epithelial tube formation	17	1.96065e-06	0.000272847
caudate	up	GO BP term	GO:0008589	regulation of smoothened signaling pathway	13	2.06898e-06	0.000278924
caudate	up	GO BP term	GO:0014020	primary neural tube formation	14	2.89101e-06	0.000377933
caudate	up	GO BP term	GO:0001843	neural tube closure	13	6.62633e-06	0.000840764
caudate	up	GO BP term	GO:1902017	regulation of cilium assembly	10	7.11189e-06	0.000869948
caudate	up	GO BP term	GO:0001841	neural tube formation	14	7.25965e-06	0.000869948
caudate	up	GO BP term	GO:0060606	tube closure	13	7.47222e-06	0.00087122
caudate	up	GO BP term	GO:1905515	non-motile cilium assembly	10	9.92358e-06	0.00112659
caudate	up	GO BP term	GO:0003356	regulation of cilium beat frequency	5	1.18787e-05	0.00128112
caudate	up	GO BP term	GO:0060287	epithelial cilium movement involved in determination of left/right asymmetry	5	1.18787e-05	0.00128112
caudate	up	GO BP term	GO:0042073	intraciliary transport	9	3.09179e-05	0.00315042
caudate	up	GO BP term	GO:0021510	spinal cord development	13	3.09539e-05	0.00315042
caudate	up	GO BP term	GO:0060601	lateral sprouting from an epithelium	5	3.14019e-05	0.00315042
caudate	up	GO BP term	GO:0061371	determination of heart left/right asymmetry	10	4.299e-05	0.00421498
caudate	up	GO BP term	GO:0001738	morphogenesis of a polarized epithelium	12	7.01236e-05	0.00664071
caudate	up	GO BP term	GO:0003007	heart morphogenesis	21	7.08096e-05	0.00664071
caudate	up	GO BP term	GO:0060562	epithelial tube morphogenesis	26	7.78866e-05	0.00714899
caudate	up	GO BP term	GO:0045992	negative regulation of embryonic development	6	0.000126144	0.0113372
caudate	up	GO BP term	GO:0035089	establishment of apical/basal cell polarity	5	0.000242573	0.0213563
caudate	up	GO BP term	GO:0021532	neural tube patterning	7	0.000258865	0.0223349
caudate	up	GO BP term	GO:0003002	regionalization	25	0.000273328	0.0230064
caudate	up	GO BP term	GO:0001656	metanephros development	11	0.000277314	0.0230064
caudate	up	GO BP term	GO:0030859	polarized epithelial cell differentiation	5	0.000315117	0.0256494
caudate	up	GO BP term	GO:0035088	establishment or maintenance of apical/basal cell polarity	7	0.000351434	0.0275652
caudate	up	GO BP term	GO:0061245	establishment or maintenance of bipolar cell polarity	7	0.000351434	0.0275652
caudate	up	GO BP term	GO:0009132	nucleoside diphosphate metabolic process	12	0.000369228	0.0284438
caudate	up	GO BP term	GO:0007288	sperm axoneme assembly	4	0.000390153	0.0295284
caudate	up	GO BP term	GO:0061162	establishment of monopolar cell polarity	5	0.000402969	0.0299726
caudate	up	GO BP term	GO:0001654	eye development	25	0.000476233	0.0342496
caudate	up	GO BP term	GO:0045995	regulation of embryonic development	13	0.000477931	0.0342496
caudate	up	GO BP term	GO:0150063	visual system development	25	0.000494811	0.0342496
caudate	up	GO BP term	GO:0021513	spinal cord dorsal/ventral patterning	5	0.000508107	0.0342496
caudate	up	GO BP term	GO:0060972	left/right pattern formation	5	0.000508107	0.0342496
caudate	up	GO BP term	GO:0061339	establishment or maintenance of monopolar cell polarity	5	0.000508107	0.0342496
caudate	up	GO BP term	GO:0072070	loop of Henle development	4	0.000549598	0.0359237
caudate	up	GO BP term	GO:0090179	planar cell polarity pathway involved in neural tube closure	4	0.000549598	0.0359237
caudate	up	GO BP term	GO:0045880	positive regulation of smoothened signaling pathway	6	0.000595268	0.0383281
caudate	up	GO BP term	GO:0001947	heart looping	8	0.000615066	0.0390205
caudate	up	GO BP term	GO:0048562	embryonic organ morphogenesis	21	0.000662161	0.0413995
caudate	up	GO BP term	GO:0021517	ventral spinal cord development	7	0.00070125	0.0425174
caudate	up	GO BP term	GO:0061512	protein localization to cilium	7	0.00070125	0.0425174
caudate	up	GO BP term	GO:0021781	glial cell fate commitment	4	0.000750402	0.0425174
caudate	up	GO BP term	GO:0045198	establishment of epithelial cell apical/basal polarity	4	0.000750402	0.0425174
caudate	up	GO BP term	GO:0060831	smoothened signaling pathway involved in dorsal/ventral neural tube patterning	4	0.000750402	0.0425174
caudate	up	GO BP term	GO:0090178	regulation of establishment of planar polarity involved in neural tube closure	4	0.000750402	0.0425174
caudate	up	GO BP term	GO:0048568	embryonic organ development	28	0.00075472	0.0425174
caudate	up	GO BP term	GO:0048880	sensory system development	25	0.000772518	0.0425174
caudate	up	GO BP term	GO:0021511	spinal cord patterning	5	0.000778599	0.0425174
caudate	up	GO BP term	GO:0021904	dorsal/ventral neural tube patterning	5	0.000778599	0.0425174
caudate	up	GO BP term	GO:0040018	positive regulation of multicellular organism growth	6	0.000817457	0.0440814
caudate	up	KEGG pathway	hsa05016	Huntington disease	29	2.08501e-08	5.33762e-06
caudate	up	KEGG pathway	hsa04340	Hedgehog signaling pathway	10	7.1427e-05	0.00914265
caudate	up	KEGG pathway	hsa04260	Cardiac muscle contraction	12	0.000154628	0.013195
caudate	up	KEGG pathway	hsa05150	Staphylococcus aureus infection	13	0.000227131	0.0145364
caudate	up	KEGG pathway	hsa00340	Histidine metabolism	6	0.00038573	0.0164578
caudate	up	KEGG pathway	hsa04977	Vitamin digestion and absorption	6	0.00038573	0.0164578
caudate	up	KEGG pathway	hsa04514	Cell adhesion molecules (CAMs)	19	0.000634037	0.0231876
caudate	up	KEGG pathway	hsa05310	Asthma	9	0.000910878	0.0291481
caudate	up	KEGG pathway	hsa05414	Dilated cardiomyopathy (DCM)	12	0.00138245	0.037851
caudate	up	KEGG pathway	hsa04640	Hematopoietic cell lineage	14	0.00147856	0.037851
caudate	up	KEGG pathway	hsa00350	Tyrosine metabolism	7	0.00195389	0.0426424
caudate	up	KEGG pathway	hsa05217	Basal cell carcinoma	9	0.00212774	0.0426424
caudate	up	KEGG pathway	hsa00010	Glycolysis / Gluconeogenesis	10	0.00238486	0.0426424
caudate	up	KEGG pathway	hsa04978	Mineral absorption	8	0.0024378	0.0426424
caudate	up	KEGG pathway	hsa04911	Insulin secretion	11	0.00266515	0.0426424
caudate	up	KEGG pathway	hsa04974	Protein digestion and absorption	11	0.00266515	0.0426424
caudate	up	KEGG pathway	hsa00760	Nicotinate and nicotinamide metabolism	6	0.00327941	0.0472656
caudate	up	KEGG pathway	hsa00982	Drug metabolism - cytochrome P450	10	0.00332336	0.0472656
caudate	down	GO BP term	GO:0050804	modulation of chemical synaptic transmission	87	1.17554e-16	3.715e-13
caudate	down	GO BP term	GO:0099177	regulation of trans-synaptic signaling	87	1.34675e-16	3.715e-13
caudate	down	GO BP term	GO:0099003	vesicle-mediated transport in synapse	52	3.84947e-15	5.41287e-12
caudate	down	GO BP term	GO:0050808	synapse organization	79	3.92451e-15	5.41287e-12
caudate	down	GO BP term	GO:0048167	regulation of synaptic plasticity	48	2.59248e-14	2.86055e-11
caudate	down	GO BP term	GO:0051650	establishment of vesicle localization	61	1.42137e-13	1.30695e-10
caudate	down	GO BP term	GO:0007611	learning or memory	57	3.39876e-13	2.67871e-10
caudate	down	GO BP term	GO:0010976	positive regulation of neuron projection development	58	4.06388e-13	2.80255e-10
caudate	down	GO BP term	GO:0051648	vesicle localization	62	6.26218e-13	3.75471e-10
caudate	down	GO BP term	GO:0043161	proteasome-mediated ubiquitin-dependent protein catabolic process	76	6.80572e-13	3.75471e-10
caudate	down	GO BP term	GO:0048489	synaptic vesicle transport	39	7.68252e-12	3.48056e-09
caudate	down	GO BP term	GO:0097480	establishment of synaptic vesicle localization	39	7.68252e-12	3.48056e-09
caudate	down	GO BP term	GO:0099504	synaptic vesicle cycle	45	8.37997e-12	3.48056e-09
caudate	down	GO BP term	GO:0034765	regulation of ion transmembrane transport	78	9.22709e-12	3.48056e-09
caudate	down	GO BP term	GO:0017156	calcium ion regulated exocytosis	39	9.46319e-12	3.48056e-09
caudate	down	GO BP term	GO:0046928	regulation of neurotransmitter secretion	31	1.38388e-11	4.77179e-09
caudate	down	GO BP term	GO:0017158	regulation of calcium ion-dependent exocytosis	31	2.33768e-11	6.8819e-09
caudate	down	GO BP term	GO:0050890	cognition	60	2.36858e-11	6.8819e-09
caudate	down	GO BP term	GO:0007269	neurotransmitter secretion	40	2.4948e-11	6.8819e-09
caudate	down	GO BP term	GO:0099643	signal release from synapse	40	2.4948e-11	6.8819e-09
caudate	down	GO BP term	GO:0031346	positive regulation of cell projection organization	67	3.62317e-11	9.51858e-09
caudate	down	GO BP term	GO:0016079	synaptic vesicle exocytosis	33	5.93039e-11	1.48014e-08
caudate	down	GO BP term	GO:0051588	regulation of neurotransmitter transport	37	6.17059e-11	1.48014e-08
caudate	down	GO BP term	GO:0045666	positive regulation of neuron differentiation	64	6.75643e-11	1.55313e-08
caudate	down	GO BP term	GO:0042391	regulation of membrane potential	73	8.77487e-11	1.93644e-08
caudate	down	GO BP term	GO:0097479	synaptic vesicle localization	39	9.9571e-11	2.11282e-08
caudate	down	GO BP term	GO:0016358	dendrite development	48	1.09498e-10	2.23741e-08
caudate	down	GO BP term	GO:0106027	neuron projection organization	27	1.23545e-10	2.43427e-08
caudate	down	GO BP term	GO:0017157	regulation of exocytosis	44	1.94635e-10	3.70277e-08
caudate	down	GO BP term	GO:0098693	regulation of synaptic vesicle cycle	31	2.09487e-10	3.85246e-08
caudate	down	GO BP term	GO:1902803	regulation of synaptic vesicle transport	26	2.27519e-10	4.04911e-08
caudate	down	GO BP term	GO:0099173	postsynapse organization	39	2.46456e-10	4.24905e-08
caudate	down	GO BP term	GO:0032412	regulation of ion transmembrane transporter activity	48	3.04434e-10	5.08808e-08
caudate	down	GO BP term	GO:2000300	regulation of synaptic vesicle exocytosis	25	3.13566e-10	5.08808e-08
caudate	down	GO BP term	GO:1904062	regulation of cation transmembrane transport	57	5.10922e-10	8.05359e-08
caudate	down	GO BP term	GO:0050807	regulation of synapse organization	47	5.50857e-10	8.44189e-08
caudate	down	GO BP term	GO:0032409	regulation of transporter activity	50	6.44328e-10	9.60746e-08
caudate	down	GO BP term	GO:0022898	regulation of transmembrane transporter activity	48	8.07744e-10	1.17272e-07
caudate	down	GO BP term	GO:0050769	positive regulation of neurogenesis	74	9.81816e-10	1.38889e-07
caudate	down	GO BP term	GO:0050803	regulation of synapse structure or activity	47	1.44955e-09	1.99929e-07
caudate	down	GO BP term	GO:0007612	learning	34	1.89104e-09	2.5446e-07
caudate	down	GO BP term	GO:0000209	protein polyubiquitination	50	2.32871e-09	3.0017e-07
caudate	down	GO BP term	GO:0097061	dendritic spine organization	24	2.33955e-09	3.0017e-07
caudate	down	GO BP term	GO:0001508	action potential	32	2.59365e-09	3.25208e-07
caudate	down	GO BP term	GO:0099132	ATP hydrolysis coupled cation transmembrane transport	20	3.24018e-09	3.97246e-07
caudate	down	GO BP term	GO:0050773	regulation of dendrite development	33	5.07121e-09	6.08215e-07
caudate	down	GO BP term	GO:0023061	signal release	71	1.0591e-08	1.2432e-06
caudate	down	GO BP term	GO:0006836	neurotransmitter transport	50	1.10437e-08	1.26933e-06
caudate	down	GO BP term	GO:0070936	protein K48-linked ubiquitination	20	1.14727e-08	1.29174e-06
caudate	down	GO BP term	GO:0010256	endomembrane system organization	66	1.25101e-08	1.38036e-06
caudate	down	GO BP term	GO:0048813	dendrite morphogenesis	32	1.34404e-08	1.45393e-06
caudate	down	GO BP term	GO:1903305	regulation of regulated secretory pathway	33	1.69461e-08	1.79791e-06
caudate	down	GO BP term	GO:0060996	dendritic spine development	25	1.83164e-08	1.90664e-06
caudate	down	GO BP term	GO:0010769	regulation of cell morphogenesis involved in differentiation	51	2.44482e-08	2.49779e-06
caudate	down	GO BP term	GO:0099175	regulation of postsynapse organization	26	2.83971e-08	2.84849e-06
caudate	down	GO BP term	GO:0006813	potassium ion transport	44	3.74842e-08	3.69286e-06
caudate	down	GO BP term	GO:0007613	memory	28	3.86648e-08	3.74234e-06
caudate	down	GO BP term	GO:0070588	calcium ion transmembrane transport	52	4.58776e-08	4.36391e-06
caudate	down	GO BP term	GO:0032386	regulation of intracellular transport	64	6.18405e-08	5.78261e-06
caudate	down	GO BP term	GO:0035637	multicellular organismal signaling	35	6.95541e-08	6.3955e-06
caudate	down	GO BP term	GO:0072659	protein localization to plasma membrane	45	9.74554e-08	8.81412e-06
caudate	down	GO BP term	GO:0043687	post-translational protein modification	59	1.24645e-07	1.10914e-05
caudate	down	GO BP term	GO:0006914	autophagy	69	1.39381e-07	1.20151e-05
caudate	down	GO BP term	GO:0061919	process utilizing autophagic mechanism	69	1.39381e-07	1.20151e-05
caudate	down	GO BP term	GO:0007626	locomotory behavior	37	1.45749e-07	1.23707e-05
caudate	down	GO BP term	GO:0048814	regulation of dendrite morphogenesis	23	1.54295e-07	1.28976e-05
caudate	down	GO BP term	GO:0060998	regulation of dendritic spine development	20	2.18256e-07	1.79719e-05
caudate	down	GO BP term	GO:0071804	cellular potassium ion transport	39	2.36889e-07	1.89408e-05
caudate	down	GO BP term	GO:0071805	potassium ion transmembrane transport	39	2.36889e-07	1.89408e-05
caudate	down	GO BP term	GO:0009199	ribonucleoside triphosphate metabolic process	49	2.43178e-07	1.91659e-05
caudate	down	GO BP term	GO:0050806	positive regulation of synaptic transmission	35	2.74456e-07	2.13264e-05
caudate	down	GO BP term	GO:0061001	regulation of dendritic spine morphogenesis	15	2.99874e-07	2.27573e-05
caudate	down	GO BP term	GO:0048193	Golgi vesicle transport	57	3.02838e-07	2.27573e-05
caudate	down	GO BP term	GO:0009141	nucleoside triphosphate metabolic process	51	3.05246e-07	2.27573e-05
caudate	down	GO BP term	GO:0051668	localization within membrane	30	3.70825e-07	2.72779e-05
caudate	down	GO BP term	GO:0016236	macroautophagy	47	4.17861e-07	3.03334e-05
caudate	down	GO BP term	GO:1903169	regulation of calcium ion transmembrane transport	30	4.29921e-07	3.06873e-05
caudate	down	GO BP term	GO:1990778	protein localization to cell periphery	49	4.34434e-07	3.06873e-05
caudate	down	GO BP term	GO:0097484	dendrite extension	13	4.4215e-07	3.06873e-05
caudate	down	GO BP term	GO:0048013	ephrin receptor signaling pathway	21	4.44986e-07	3.06873e-05
caudate	down	GO BP term	GO:0006470	protein dephosphorylation	54	4.60617e-07	3.13731e-05
caudate	down	GO BP term	GO:0015991	ATP hydrolysis coupled proton transport	12	4.7922e-07	3.22422e-05
caudate	down	GO BP term	GO:0009260	ribonucleotide biosynthetic process	43	4.92577e-07	3.27415e-05
caudate	down	GO BP term	GO:0009161	ribonucleoside monophosphate metabolic process	50	5.54152e-07	3.63959e-05
caudate	down	GO BP term	GO:0061003	positive regulation of dendritic spine morphogenesis	10	6.20199e-07	4.02546e-05
caudate	down	GO BP term	GO:0060997	dendritic spine morphogenesis	17	6.87399e-07	4.40974e-05
caudate	down	GO BP term	GO:1902600	proton transmembrane transport	32	7.07659e-07	4.48753e-05
caudate	down	GO BP term	GO:0045956	positive regulation of calcium ion-dependent exocytosis	11	7.38347e-07	4.62893e-05
caudate	down	GO BP term	GO:0009123	nucleoside monophosphate metabolic process	52	7.90261e-07	4.89873e-05
caudate	down	GO BP term	GO:0009205	purine ribonucleoside triphosphate metabolic process	47	8.20985e-07	5.03264e-05
caudate	down	GO BP term	GO:0072384	organelle transport along microtubule	20	8.4044e-07	5.09528e-05
caudate	down	GO BP term	GO:0046390	ribose phosphate biosynthetic process	43	9.13991e-07	5.48097e-05
caudate	down	GO BP term	GO:1901021	positive regulation of calcium ion transmembrane transporter activity	13	9.31029e-07	5.52311e-05
caudate	down	GO BP term	GO:0006457	protein folding	39	1.04632e-06	6.141e-05
caudate	down	GO BP term	GO:0099131	ATP hydrolysis coupled ion transmembrane transport	12	1.09243e-06	6.34412e-05
caudate	down	GO BP term	GO:0060078	regulation of postsynaptic membrane potential	29	1.38121e-06	7.93762e-05
caudate	down	GO BP term	GO:0072583	clathrin-dependent endocytosis	14	1.41239e-06	8.03315e-05
caudate	down	GO BP term	GO:0010959	regulation of metal ion transport	57	1.43681e-06	8.06498e-05
caudate	down	GO BP term	GO:1904814	regulation of protein localization to chromosome, telomeric region	8	1.44924e-06	8.06498e-05
caudate	down	GO BP term	GO:1902305	regulation of sodium ion transmembrane transport	17	1.46184e-06	8.06498e-05
caudate	down	GO BP term	GO:0001505	regulation of neurotransmitter levels	55	1.52257e-06	8.31686e-05
caudate	down	GO BP term	GO:1904427	positive regulation of calcium ion transmembrane transport	18	1.55991e-06	8.39766e-05
caudate	down	GO BP term	GO:0009144	purine nucleoside triphosphate metabolic process	47	1.56781e-06	8.39766e-05
caudate	down	GO BP term	GO:0090662	ATP hydrolysis coupled transmembrane transport	12	1.60425e-06	8.4327e-05
caudate	down	GO BP term	GO:0061337	cardiac conduction	24	1.60492e-06	8.4327e-05
caudate	down	GO BP term	GO:0046034	ATP metabolic process	43	1.82249e-06	9.48556e-05
caudate	down	GO BP term	GO:0009167	purine ribonucleoside monophosphate metabolic process	47	2.0515e-06	0.000105777
caudate	down	GO BP term	GO:0010770	positive regulation of cell morphogenesis involved in differentiation	29	2.08267e-06	0.00010639
caudate	down	GO BP term	GO:0060291	long-term synaptic potentiation	21	2.16936e-06	0.000109801
caudate	down	GO BP term	GO:0009126	purine nucleoside monophosphate metabolic process	47	2.24144e-06	0.000112418
caudate	down	GO BP term	GO:0015988	energy coupled proton transmembrane transport, against electrochemical gradient	12	2.317e-06	0.000115161
caudate	down	GO BP term	GO:0034314	Arp2/3 complex-mediated actin nucleation	13	2.56407e-06	0.000124413
caudate	down	GO BP term	GO:0050775	positive regulation of dendrite morphogenesis	13	2.56407e-06	0.000124413
caudate	down	GO BP term	GO:0060999	positive regulation of dendritic spine development	14	2.5708e-06	0.000124413
caudate	down	GO BP term	GO:0007409	axonogenesis	62	2.75197e-06	0.000132023
caudate	down	GO BP term	GO:1903859	regulation of dendrite extension	10	2.82185e-06	0.000134208
caudate	down	GO BP term	GO:2000649	regulation of sodium ion transmembrane transporter activity	15	3.13883e-06	0.000148008
caudate	down	GO BP term	GO:0048588	developmental cell growth	39	3.29598e-06	0.000154101
caudate	down	GO BP term	GO:2001257	regulation of cation channel activity	30	4.24561e-06	0.000196832
caudate	down	GO BP term	GO:0008306	associative learning	19	4.36111e-06	0.000200502
caudate	down	GO BP term	GO:0051258	protein polymerization	45	4.58136e-06	0.000208887
caudate	down	GO BP term	GO:0009152	purine ribonucleotide biosynthetic process	39	4.8897e-06	0.000221119
caudate	down	GO BP term	GO:0006164	purine nucleotide biosynthetic process	41	5.02982e-06	0.000225606
caudate	down	GO BP term	GO:0007006	mitochondrial membrane organization	27	5.12098e-06	0.000225709
caudate	down	GO BP term	GO:0035725	sodium ion transmembrane transport	27	5.12098e-06	0.000225709
caudate	down	GO BP term	GO:0009165	nucleotide biosynthetic process	51	5.16926e-06	0.000225709
caudate	down	GO BP term	GO:1902905	positive regulation of supramolecular fiber organization	36	5.19576e-06	0.000225709
caudate	down	GO BP term	GO:0031503	protein-containing complex localization	44	5.2642e-06	0.000226895
caudate	down	GO BP term	GO:1900006	positive regulation of dendrite development	18	5.56522e-06	0.00023715
caudate	down	GO BP term	GO:0036465	synaptic vesicle recycling	17	5.69145e-06	0.00023715
caudate	down	GO BP term	GO:0070202	regulation of establishment of protein localization to chromosome	7	5.71705e-06	0.00023715
caudate	down	GO BP term	GO:1904816	positive regulation of protein localization to chromosome, telomeric region	7	5.71705e-06	0.00023715
caudate	down	GO BP term	GO:1990173	protein localization to nucleoplasm	7	5.71705e-06	0.00023715
caudate	down	GO BP term	GO:1901293	nucleoside phosphate biosynthetic process	51	6.52108e-06	0.000268483
caudate	down	GO BP term	GO:1990138	neuron projection extension	30	6.88396e-06	0.000281325
caudate	down	GO BP term	GO:0099072	regulation of postsynaptic membrane neurotransmitter receptor levels	17	7.01666e-06	0.000284639
caudate	down	GO BP term	GO:0030705	cytoskeleton-dependent intracellular transport	31	7.07312e-06	0.000284835
caudate	down	GO BP term	GO:0034976	response to endoplasmic reticulum stress	43	7.20261e-06	0.000287948
caudate	down	GO BP term	GO:0072522	purine-containing compound biosynthetic process	42	7.5761e-06	0.000299366
caudate	down	GO BP term	GO:0006816	calcium ion transport	59	7.59675e-06	0.000299366
caudate	down	GO BP term	GO:1901019	regulation of calcium ion transmembrane transporter activity	20	8.27841e-06	0.000323915
caudate	down	GO BP term	GO:0016050	vesicle organization	48	8.71496e-06	0.000336773
caudate	down	GO BP term	GO:0086010	membrane depolarization during action potential	12	8.72912e-06	0.000336773
caudate	down	GO BP term	GO:0055074	calcium ion homeostasis	62	9.2715e-06	0.000355214
caudate	down	GO BP term	GO:0098877	neurotransmitter receptor transport to plasma membrane	8	9.63978e-06	0.000364265
caudate	down	GO BP term	GO:0098969	neurotransmitter receptor transport to postsynaptic membrane	8	9.63978e-06	0.000364265
caudate	down	GO BP term	GO:1903861	positive regulation of dendrite extension	9	1.07732e-05	0.000404324
caudate	down	GO BP term	GO:0006839	mitochondrial transport	40	1.08902e-05	0.000404965
caudate	down	GO BP term	GO:0002028	regulation of sodium ion transport	19	1.09371e-05	0.000404965
caudate	down	GO BP term	GO:0034767	positive regulation of ion transmembrane transport	27	1.11175e-05	0.000408901
caudate	down	GO BP term	GO:0032594	protein transport within lipid bilayer	11	1.15508e-05	0.000422024
caudate	down	GO BP term	GO:1903540	establishment of protein localization to postsynaptic membrane	8	1.62539e-05	0.000589582
caudate	down	GO BP term	GO:0019932	second-messenger-mediated signaling	60	1.63506e-05	0.000589582
caudate	down	GO BP term	GO:0048168	regulation of neuronal synaptic plasticity	14	2.01569e-05	0.000722115
caudate	down	GO BP term	GO:1904064	positive regulation of cation transmembrane transport	25	2.11308e-05	0.00075212
caudate	down	GO BP term	GO:0032414	positive regulation of ion transmembrane transporter activity	20	2.20223e-05	0.000778828
caudate	down	GO BP term	GO:1903405	protein localization to nuclear body	6	2.26404e-05	0.00078558
caudate	down	GO BP term	GO:1904851	positive regulation of establishment of protein localization to telomere	6	2.26404e-05	0.00078558
caudate	down	GO BP term	GO:1904867	protein localization to Cajal body	6	2.26404e-05	0.00078558
caudate	down	GO BP term	GO:0008016	regulation of heart contraction	34	2.41562e-05	0.000828373
caudate	down	GO BP term	GO:0048278	vesicle docking	16	2.42154e-05	0.000828373
caudate	down	GO BP term	GO:0045921	positive regulation of exocytosis	18	2.43242e-05	0.000828373
caudate	down	GO BP term	GO:0006814	sodium ion transport	34	2.65661e-05	0.000899173
caudate	down	GO BP term	GO:0010644	cell communication by electrical coupling	10	2.89778e-05	0.000968911
caudate	down	GO BP term	GO:0070979	protein K11-linked ubiquitination	10	2.89778e-05	0.000968911
caudate	down	GO BP term	GO:0006874	cellular calcium ion homeostasis	59	2.96005e-05	0.00098377
caudate	down	GO BP term	GO:0006091	generation of precursor metabolites and energy	61	3.12235e-05	0.0010315
caudate	down	GO BP term	GO:0043270	positive regulation of ion transport	39	3.23947e-05	0.00106382
caudate	down	GO BP term	GO:0033572	transferrin transport	12	3.52941e-05	0.00115218
caudate	down	GO BP term	GO:0099632	protein transport within plasma membrane	9	3.62987e-05	0.00117111
caudate	down	GO BP term	GO:0099637	neurotransmitter receptor transport	9	3.62987e-05	0.00117111
caudate	down	GO BP term	GO:0021954	central nervous system neuron development	17	3.83325e-05	0.00122954
caudate	down	GO BP term	GO:0060401	cytosolic calcium ion transport	28	4.51795e-05	0.00144078
caudate	down	GO BP term	GO:0046434	organophosphate catabolic process	32	4.57606e-05	0.00145093
caudate	down	GO BP term	GO:0070203	regulation of establishment of protein localization to telomere	6	4.67597e-05	0.00145748
caudate	down	GO BP term	GO:0098887	neurotransmitter receptor transport, endosome to postsynaptic membrane	6	4.67597e-05	0.00145748
caudate	down	GO BP term	GO:0099639	neurotransmitter receptor transport, endosome to plasma membrane	6	4.67597e-05	0.00145748
caudate	down	GO BP term	GO:0045010	actin nucleation	14	4.79904e-05	0.00146661
caudate	down	GO BP term	GO:0086065	cell communication involved in cardiac conduction	14	4.79904e-05	0.00146661
caudate	down	GO BP term	GO:0008542	visual learning	13	4.81162e-05	0.00146661
caudate	down	GO BP term	GO:1903307	positive regulation of regulated secretory pathway	13	4.81162e-05	0.00146661
caudate	down	GO BP term	GO:0045333	cellular respiration	30	5.36154e-05	0.00161896
caudate	down	GO BP term	GO:0051279	regulation of release of sequestered calcium ion into cytosol	17	5.37014e-05	0.00161896
caudate	down	GO BP term	GO:0006890	retrograde vesicle-mediated transport, Golgi to ER	19	5.47914e-05	0.00164285
caudate	down	GO BP term	GO:0032271	regulation of protein polymerization	34	5.52792e-05	0.00164852
caudate	down	GO BP term	GO:0015682	ferric iron transport	12	5.78383e-05	0.00170638
caudate	down	GO BP term	GO:0072512	trivalent inorganic cation transport	12	5.78383e-05	0.00170638
caudate	down	GO BP term	GO:0032535	regulation of cellular component size	50	5.96019e-05	0.00174906
caudate	down	GO BP term	GO:0099518	vesicle cytoskeletal trafficking	13	5.99582e-05	0.00175021
caudate	down	GO BP term	GO:0097553	calcium ion transmembrane import into cytosol	24	6.06716e-05	0.00176171
caudate	down	GO BP term	GO:1904874	positive regulation of telomerase RNA localization to Cajal body	7	6.38284e-05	0.00184367
caudate	down	GO BP term	GO:0032273	positive regulation of protein polymerization	25	6.93897e-05	0.00199387
caudate	down	GO BP term	GO:0032411	positive regulation of transporter activity	20	7.06432e-05	0.00201937
caudate	down	GO BP term	GO:0043112	receptor metabolic process	32	7.27215e-05	0.00206806
caudate	down	GO BP term	GO:0006904	vesicle docking involved in exocytosis	12	7.316e-05	0.00206986
caudate	down	GO BP term	GO:0038093	Fc receptor signaling pathway	23	7.45514e-05	0.00209847
caudate	down	GO BP term	GO:0034764	positive regulation of transmembrane transport	30	7.88924e-05	0.00220939
caudate	down	GO BP term	GO:0051899	membrane depolarization	18	8.66151e-05	0.00241341
caudate	down	GO BP term	GO:0032970	regulation of actin filament-based process	50	8.7723e-05	0.00242203
caudate	down	GO BP term	GO:0099550	trans-synaptic signaling, modulating synaptic transmission	6	8.78024e-05	0.00242203
caudate	down	GO BP term	GO:0030838	positive regulation of actin filament polymerization	20	9.24815e-05	0.00252584
caudate	down	GO BP term	GO:0048259	regulation of receptor-mediated endocytosis	20	9.24815e-05	0.00252584
caudate	down	GO BP term	GO:0051495	positive regulation of cytoskeleton organization	35	9.49042e-05	0.00257924
caudate	down	GO BP term	GO:1903522	regulation of blood circulation	37	9.75026e-05	0.00263687
caudate	down	GO BP term	GO:0086001	cardiac muscle cell action potential	16	0.000100076	0.00268618
caudate	down	GO BP term	GO:0010882	regulation of cardiac muscle contraction by calcium ion signaling	9	0.000100722	0.00268618
caudate	down	GO BP term	GO:0140029	exocytic process	17	0.00010148	0.00268618
caudate	down	GO BP term	GO:0048791	calcium ion-regulated exocytosis of neurotransmitter	7	0.00010176	0.00268618
caudate	down	GO BP term	GO:2000369	regulation of clathrin-dependent endocytosis	7	0.00010176	0.00268618
caudate	down	GO BP term	GO:0051963	regulation of synapse assembly	20	0.000105492	0.00277143
caudate	down	GO BP term	GO:0060047	heart contraction	35	0.000111717	0.00292106
caudate	down	GO BP term	GO:0002433	immune response-regulating cell surface receptor signaling pathway involved in phagocytosis	16	0.000117586	0.00304566
caudate	down	GO BP term	GO:0038096	Fc-gamma receptor signaling pathway involved in phagocytosis	16	0.000117586	0.00304566
caudate	down	GO BP term	GO:0010970	transport along microtubule	25	0.000119555	0.00306783
caudate	down	GO BP term	GO:0099111	microtubule-based transport	25	0.000119555	0.00306783
caudate	down	GO BP term	GO:0007416	synapse assembly	27	0.000127647	0.00326032
caudate	down	GO BP term	GO:0060359	response to ammonium ion	24	0.000133667	0.00335412
caudate	down	GO BP term	GO:0035418	protein localization to synapse	15	0.000134338	0.00335412
caudate	down	GO BP term	GO:0043624	cellular protein complex disassembly	32	0.000134523	0.00335412
caudate	down	GO BP term	GO:0007632	visual behavior	13	0.000136183	0.00335412
caudate	down	GO BP term	GO:0048488	synaptic vesicle endocytosis	13	0.000136183	0.00335412
caudate	down	GO BP term	GO:0098900	regulation of action potential	13	0.000136183	0.00335412
caudate	down	GO BP term	GO:0140238	presynaptic endocytosis	13	0.000136183	0.00335412
caudate	down	GO BP term	GO:1990089	response to nerve growth factor	13	0.000136183	0.00335412
caudate	down	GO BP term	GO:0010921	regulation of phosphatase activity	30	0.000137104	0.00336179
caudate	down	GO BP term	GO:0070585	protein localization to mitochondrion	25	0.000147339	0.00359676
caudate	down	GO BP term	GO:0031345	negative regulation of cell projection organization	28	0.000149628	0.00363655
caudate	down	GO BP term	GO:0036498	IRE1-mediated unfolded protein response	14	0.00015068	0.00364605
caudate	down	GO BP term	GO:0099638	endosome to plasma membrane protein transport	6	0.000153108	0.00368862
caudate	down	GO BP term	GO:1902903	regulation of supramolecular fiber organization	47	0.00015863	0.00380506
caudate	down	GO BP term	GO:0030968	endoplasmic reticulum unfolded protein response	21	0.000161037	0.00384606
caudate	down	GO BP term	GO:0006888	ER to Golgi vesicle-mediated transport	32	0.000173124	0.00409926
caudate	down	GO BP term	GO:0032869	cellular response to insulin stimulus	32	0.000173124	0.00409926
caudate	down	GO BP term	GO:0060560	developmental growth involved in morphogenesis	34	0.000178288	0.00420348
caudate	down	GO BP term	GO:0009156	ribonucleoside monophosphate biosynthetic process	25	0.000180721	0.00424272
caudate	down	GO BP term	GO:0086012	membrane depolarization during cardiac muscle cell action potential	8	0.000184814	0.00432042
caudate	down	GO BP term	GO:0038094	Fc-gamma receptor signaling pathway	16	0.00018714	0.00435633
caudate	down	GO BP term	GO:1901653	cellular response to peptide	48	0.000196497	0.00455494
caudate	down	GO BP term	GO:0034404	nucleobase-containing small molecule biosynthetic process	28	0.000197436	0.00455755
caudate	down	GO BP term	GO:0007030	Golgi organization	25	0.000199803	0.00459297
caudate	down	GO BP term	GO:1901292	nucleoside phosphate catabolic process	24	0.000203889	0.00466746
caudate	down	GO BP term	GO:0010506	regulation of autophagy	42	0.00020607	0.00469788
caudate	down	GO BP term	GO:0003015	heart process	35	0.000209135	0.00474042
caudate	down	GO BP term	GO:0098876	vesicle-mediated transport to the plasma membrane	17	0.000210833	0.00474042
caudate	down	GO BP term	GO:1903539	protein localization to postsynaptic membrane	10	0.000211121	0.00474042
caudate	down	GO BP term	GO:0042326	negative regulation of phosphorylation	56	0.000211373	0.00474042
caudate	down	GO BP term	GO:0030433	ubiquitin-dependent ERAD pathway	16	0.000217173	0.00485078
caudate	down	GO BP term	GO:0032482	Rab protein signal transduction	15	0.000218427	0.00485912
caudate	down	GO BP term	GO:0072655	establishment of protein localization to mitochondrion	24	0.000225884	0.00500482
caudate	down	GO BP term	GO:0009124	nucleoside monophosphate biosynthetic process	26	0.000235332	0.00519332
caudate	down	GO BP term	GO:0110053	regulation of actin filament organization	37	0.000240039	0.00527607
caudate	down	GO BP term	GO:0002431	Fc receptor mediated stimulatory signaling pathway	16	0.000251299	0.00550165
caudate	down	GO BP term	GO:0070199	establishment of protein localization to chromosome	8	0.000254704	0.00553229
caudate	down	GO BP term	GO:0086064	cell communication by electrical coupling involved in cardiac conduction	8	0.000254704	0.00553229
caudate	down	GO BP term	GO:0009201	ribonucleoside triphosphate biosynthetic process	22	0.000256672	0.00555317
caudate	down	GO BP term	GO:0009187	cyclic nucleotide metabolic process	11	0.000271527	0.00585163
caudate	down	GO BP term	GO:0009166	nucleotide catabolic process	23	0.000282281	0.00604003
caudate	down	GO BP term	GO:0006090	pyruvate metabolic process	20	0.000282459	0.00604003
caudate	down	GO BP term	GO:0007015	actin filament organization	51	0.000294702	0.00627749
caudate	down	GO BP term	GO:0010522	regulation of calcium ion transport into cytosol	18	0.000296665	0.006295
caudate	down	GO BP term	GO:0010977	negative regulation of neuron projection development	24	0.000304953	0.00644608
caudate	down	GO BP term	GO:0097120	receptor localization to synapse	12	0.000313529	0.00654887
caudate	down	GO BP term	GO:1990090	cellular response to nerve growth factor stimulus	12	0.000313529	0.00654887
caudate	down	GO BP term	GO:0042407	cristae formation	9	0.000314564	0.00654887
caudate	down	GO BP term	GO:0070198	protein localization to chromosome, telomeric region	9	0.000314564	0.00654887
caudate	down	GO BP term	GO:0006754	ATP biosynthetic process	20	0.000316926	0.00657324
caudate	down	GO BP term	GO:0007007	inner mitochondrial membrane organization	11	0.000333872	0.00689024
caudate	down	GO BP term	GO:1904872	regulation of telomerase RNA localization to Cajal body	7	0.000334708	0.00689024
caudate	down	GO BP term	GO:0070534	protein K63-linked ubiquitination	13	0.000337756	0.00692714
caudate	down	GO BP term	GO:0043266	regulation of potassium ion transport	19	0.000348765	0.00712643
caudate	down	GO BP term	GO:0051208	sequestering of calcium ion	21	0.000356015	0.00716073
caudate	down	GO BP term	GO:0000338	protein deneddylation	5	0.000358231	0.00716073
caudate	down	GO BP term	GO:0031630	regulation of synaptic vesicle fusion to presynaptic active zone membrane	5	0.000358231	0.00716073
caudate	down	GO BP term	GO:0098917	retrograde trans-synaptic signaling	5	0.000358231	0.00716073
caudate	down	GO BP term	GO:0099188	postsynaptic cytoskeleton organization	5	0.000358231	0.00716073
caudate	down	GO BP term	GO:0099566	regulation of postsynaptic cytosolic calcium ion concentration	5	0.000358231	0.00716073
caudate	down	GO BP term	GO:0015980	energy derivation by oxidation of organic compounds	37	0.000365666	0.00728296
caudate	down	GO BP term	GO:0034315	regulation of Arp2/3 complex-mediated actin nucleation	6	0.000393817	0.00781543
caudate	down	GO BP term	GO:0003012	muscle system process	55	0.000395741	0.00782546
caudate	down	GO BP term	GO:0051204	protein insertion into mitochondrial membrane	9	0.000405099	0.00795906
caudate	down	GO BP term	GO:0086003	cardiac muscle cell contraction	14	0.000405383	0.00795906
caudate	down	GO BP term	GO:0060402	calcium ion transport into cytosol	24	0.00040743	0.0079709
caudate	down	GO BP term	GO:0035303	regulation of dephosphorylation	33	0.000412101	0.00803379
caudate	down	GO BP term	GO:0030307	positive regulation of cell growth	27	0.000421893	0.00819573
caudate	down	GO BP term	GO:0036503	ERAD pathway	18	0.000429806	0.00832015
caudate	down	GO BP term	GO:0051235	maintenance of location	42	0.000442929	0.00854419
caudate	down	GO BP term	GO:0032956	regulation of actin cytoskeleton organization	43	0.000454612	0.00873901
caudate	down	GO BP term	GO:0046856	phosphatidylinositol dephosphorylation	8	0.000459252	0.00876711
caudate	down	GO BP term	GO:1903421	regulation of synaptic vesicle recycling	8	0.000459252	0.00876711
caudate	down	GO BP term	GO:1901379	regulation of potassium ion transmembrane transport	17	0.000466605	0.00877848
caudate	down	GO BP term	GO:0006418	tRNA aminoacylation for protein translation	13	0.000470673	0.00877848
caudate	down	GO BP term	GO:0021756	striatum development	7	0.000470986	0.00877848
caudate	down	GO BP term	GO:0090670	RNA localization to Cajal body	7	0.000470986	0.00877848
caudate	down	GO BP term	GO:0090671	telomerase RNA localization to Cajal body	7	0.000470986	0.00877848
caudate	down	GO BP term	GO:0090672	telomerase RNA localization	7	0.000470986	0.00877848
caudate	down	GO BP term	GO:0090685	RNA localization to nucleus	7	0.000470986	0.00877848
caudate	down	GO BP term	GO:0008038	neuron recognition	11	0.000495022	0.0091954
caudate	down	GO BP term	GO:0001975	response to amphetamine	9	0.000516031	0.00947674
caudate	down	GO BP term	GO:0009261	ribonucleotide catabolic process	9	0.000516031	0.00947674
caudate	down	GO BP term	GO:0021955	central nervous system neuron axonogenesis	9	0.000516031	0.00947674
caudate	down	GO BP term	GO:0019722	calcium-mediated signaling	32	0.000517038	0.00947674
caudate	down	GO BP term	GO:0006734	NADH metabolic process	10	0.000521631	0.00952927
caudate	down	GO BP term	GO:0006119	oxidative phosphorylation	22	0.000528748	0.00956428
caudate	down	GO BP term	GO:0030048	actin filament-based movement	22	0.000528748	0.00956428
caudate	down	GO BP term	GO:0043666	regulation of phosphoprotein phosphatase activity	22	0.000528748	0.00956428
caudate	down	GO BP term	GO:0008064	regulation of actin polymerization or depolymerization	27	0.000543773	0.00980391
caudate	down	GO BP term	GO:0051283	negative regulation of sequestering of calcium ion	20	0.000550053	0.00988483
caudate	down	GO BP term	GO:1903829	positive regulation of cellular protein localization	42	0.000564102	0.0101044
caudate	down	GO BP term	GO:0030832	regulation of actin filament length	27	0.000590758	0.0105323
caudate	down	GO BP term	GO:0070200	establishment of protein localization to telomere	6	0.000591811	0.0105323
caudate	down	GO BP term	GO:0051932	synaptic transmission, GABAergic	11	0.00059727	0.0105953
caudate	down	GO BP term	GO:0034629	cellular protein-containing complex localization	8	0.000602664	0.0106567
caudate	down	GO BP term	GO:0006900	vesicle budding from membrane	18	0.000611766	0.0107831
caudate	down	GO BP term	GO:0002091	negative regulation of receptor internalization	5	0.000617791	0.0107859
caudate	down	GO BP term	GO:1902805	positive regulation of synaptic vesicle transport	5	0.000617791	0.0107859
caudate	down	GO BP term	GO:1902950	regulation of dendritic spine maintenance	5	0.000617791	0.0107859
caudate	down	GO BP term	GO:0071375	cellular response to peptide hormone stimulus	41	0.000621054	0.0108087
caudate	down	GO BP term	GO:0071867	response to monoamine	10	0.000640933	0.0110353
caudate	down	GO BP term	GO:0071869	response to catecholamine	10	0.000640933	0.0110353
caudate	down	GO BP term	GO:1901016	regulation of potassium ion transmembrane transporter activity	13	0.000645435	0.0110353
caudate	down	GO BP term	GO:0015985	energy coupled proton transport, down electrochemical gradient	7	0.000648074	0.0110353
caudate	down	GO BP term	GO:0015986	ATP synthesis coupled proton transport	7	0.000648074	0.0110353
caudate	down	GO BP term	GO:0034643	establishment of mitochondrion localization, microtubule-mediated	7	0.000648074	0.0110353
caudate	down	GO BP term	GO:0047497	mitochondrion transport along microtubule	7	0.000648074	0.0110353
caudate	down	GO BP term	GO:0007265	Ras protein signal transduction	53	0.00065692	0.0111515
caudate	down	GO BP term	GO:0051282	regulation of sequestering of calcium ion	20	0.000678402	0.0114808
caudate	down	GO BP term	GO:0009314	response to radiation	54	0.000688383	0.0116141
caudate	down	GO BP term	GO:0009127	purine nucleoside monophosphate biosynthetic process	22	0.000706899	0.011854
caudate	down	GO BP term	GO:0009168	purine ribonucleoside monophosphate biosynthetic process	22	0.000706899	0.011854
caudate	down	GO BP term	GO:0001933	negative regulation of protein phosphorylation	50	0.000727337	0.0121313
caudate	down	GO BP term	GO:0006941	striated muscle contraction	25	0.000727833	0.0121313
caudate	down	GO BP term	GO:0086002	cardiac muscle cell action potential involved in contraction	12	0.000750102	0.0124139
caudate	down	GO BP term	GO:0043039	tRNA aminoacylation	13	0.000751539	0.0124139
caudate	down	GO BP term	GO:2001259	positive regulation of cation channel activity	13	0.000751539	0.0124139
caudate	down	GO BP term	GO:0008154	actin polymerization or depolymerization	30	0.0007567	0.0124618
caudate	down	GO BP term	GO:0006936	muscle contraction	43	0.000768633	0.0126207
caudate	down	GO BP term	GO:0072347	response to anesthetic	15	0.000791113	0.0129321
caudate	down	GO BP term	GO:0035304	regulation of protein dephosphorylation	25	0.000792287	0.0129321
caudate	down	GO BP term	GO:0001558	regulation of cell growth	53	0.000800513	0.0130278
caudate	down	GO BP term	GO:0060048	cardiac muscle contraction	21	0.000807093	0.0130963
caudate	down	GO BP term	GO:0099565	chemical synaptic transmission, postsynaptic	19	0.000849034	0.0137364
caudate	down	GO BP term	GO:0009142	nucleoside triphosphate biosynthetic process	22	0.000852703	0.0137554
caudate	down	GO BP term	GO:0016082	synaptic vesicle priming	6	0.000859111	0.0137782
caudate	down	GO BP term	GO:0042776	mitochondrial ATP synthesis coupled proton transport	6	0.000859111	0.0137782
caudate	down	GO BP term	GO:0016241	regulation of macroautophagy	25	0.000861647	0.0137789
caudate	down	GO BP term	GO:0008088	axo-dendritic transport	13	0.000871926	0.013823
caudate	down	GO BP term	GO:0043038	amino acid activation	13	0.000871926	0.013823
caudate	down	GO BP term	GO:0051865	protein autoubiquitination	13	0.000871926	0.013823
caudate	down	GO BP term	GO:0009206	purine ribonucleoside triphosphate biosynthetic process	20	0.00091912	0.0145295
caudate	down	GO BP term	GO:0032984	protein-containing complex disassembly	41	0.000936205	0.0147573
caudate	down	GO BP term	GO:0009416	response to light stimulus	40	0.000975061	0.0152824
caudate	down	GO BP term	GO:0070646	protein modification by small protein removal	40	0.000975061	0.0152824
caudate	down	GO BP term	GO:1902004	positive regulation of amyloid-beta formation	5	0.000996354	0.0154992
caudate	down	GO BP term	GO:0010800	positive regulation of peptidyl-threonine phosphorylation	8	0.00099732	0.0154992
caudate	down	GO BP term	GO:0070570	regulation of neuron projection regeneration	8	0.00099732	0.0154992
caudate	down	GO BP term	GO:0010765	positive regulation of sodium ion transport	9	0.00100608	0.0155914
caudate	down	GO BP term	GO:0009145	purine nucleoside triphosphate biosynthetic process	20	0.00101418	0.0156729
caudate	down	GO BP term	GO:0007215	glutamate receptor signaling pathway	16	0.00105531	0.016263
caudate	down	GO BP term	GO:0016197	endosomal transport	30	0.00108497	0.0166735
caudate	down	GO BP term	GO:0016051	carbohydrate biosynthetic process	29	0.00109911	0.0168005
caudate	down	GO BP term	GO:0032868	response to insulin	35	0.00109933	0.0168005
caudate	down	GO BP term	GO:0051209	release of sequestered calcium ion into cytosol	19	0.00115419	0.0175418
caudate	down	GO BP term	GO:0051928	positive regulation of calcium ion transport	19	0.00115419	0.0175418
caudate	down	GO BP term	GO:0034763	negative regulation of transmembrane transport	21	0.0011773	0.017827
caudate	down	GO BP term	GO:0030833	regulation of actin filament polymerization	24	0.00117942	0.017827
caudate	down	GO BP term	GO:0099509	regulation of presynaptic cytosolic calcium ion concentration	6	0.00121058	0.018248
caudate	down	GO BP term	GO:0051402	neuron apoptotic process	31	0.00122314	0.0183871
caudate	down	GO BP term	GO:0071868	cellular response to monoamine stimulus	9	0.00123508	0.018466
caudate	down	GO BP term	GO:0071870	cellular response to catecholamine stimulus	9	0.00123508	0.018466
caudate	down	GO BP term	GO:0050905	neuromuscular process	18	0.00130911	0.0195198
caudate	down	GO BP term	GO:0051592	response to calcium ion	22	0.0013355	0.0198596
caudate	down	GO BP term	GO:0047496	vesicle transport along microtubule	10	0.00136448	0.0202362
caudate	down	GO BP term	GO:0030258	lipid modification	37	0.00138678	0.0205116
caudate	down	GO BP term	GO:0035335	peptidyl-tyrosine dephosphorylation	18	0.00144969	0.0213848
caudate	down	GO BP term	GO:0032410	negative regulation of transporter activity	16	0.00148788	0.0218315
caudate	down	GO BP term	GO:1990542	mitochondrial transmembrane transport	16	0.00148788	0.0218315
caudate	down	GO BP term	GO:0021952	central nervous system projection neuron axonogenesis	7	0.00150914	0.0219772
caudate	down	GO BP term	GO:0032400	melanosome localization	7	0.00150914	0.0219772
caudate	down	GO BP term	GO:0006986	response to unfolded protein	26	0.00150977	0.0219772
caudate	down	GO BP term	GO:0005513	detection of calcium ion	5	0.00152338	0.0221171
caudate	down	GO BP term	GO:0031338	regulation of vesicle fusion	8	0.00157547	0.0228133
caudate	down	GO BP term	GO:0030072	peptide hormone secretion	33	0.00160266	0.0230884
caudate	down	GO BP term	GO:0030148	sphingolipid biosynthetic process	18	0.00160284	0.0230884
caudate	down	GO BP term	GO:0035773	insulin secretion involved in cellular response to glucose stimulus	12	0.00160805	0.0231031
caudate	down	GO BP term	GO:0014075	response to amine	10	0.00162304	0.023258
caudate	down	GO BP term	GO:0097062	dendritic spine maintenance	6	0.00166226	0.0237583
caudate	down	GO BP term	GO:0008286	insulin receptor signaling pathway	21	0.00168435	0.0240117
caudate	down	GO BP term	GO:0051924	regulation of calcium ion transport	33	0.00170543	0.0242497
caudate	down	GO BP term	GO:0000959	mitochondrial RNA metabolic process	9	0.00181876	0.0257284
caudate	down	GO BP term	GO:0051281	positive regulation of release of sequestered calcium ion into cytosol	9	0.00181876	0.0257284
caudate	down	GO BP term	GO:0045665	negative regulation of neuron differentiation	29	0.00191611	0.026901
caudate	down	GO BP term	GO:0048679	regulation of axon regeneration	7	0.00193811	0.026901
caudate	down	GO BP term	GO:0051654	establishment of mitochondrion localization	7	0.00193811	0.026901
caudate	down	GO BP term	GO:0051875	pigment granule localization	7	0.00193811	0.026901
caudate	down	GO BP term	GO:1902991	regulation of amyloid precursor protein catabolic process	7	0.00193811	0.026901
caudate	down	GO BP term	GO:1990126	retrograde transport, endosome to plasma membrane	7	0.00193811	0.026901
caudate	down	GO BP term	GO:0006099	tricarboxylic acid cycle	8	0.00194999	0.026901
caudate	down	GO BP term	GO:0007616	long-term memory	8	0.00194999	0.026901
caudate	down	GO BP term	GO:0009154	purine ribonucleotide catabolic process	8	0.00194999	0.026901
caudate	down	GO BP term	GO:0018107	peptidyl-threonine phosphorylation	18	0.00195041	0.026901
caudate	down	GO BP term	GO:0006898	receptor-mediated endocytosis	38	0.00197714	0.0272017
caudate	down	GO BP term	GO:0007210	serotonin receptor signaling pathway	9	0.00218358	0.0298188
caudate	down	GO BP term	GO:0046839	phospholipid dephosphorylation	9	0.00218358	0.0298188
caudate	down	GO BP term	GO:0086091	regulation of heart rate by cardiac conduction	9	0.00218358	0.0298188
caudate	down	GO BP term	GO:0034620	cellular response to unfolded protein	22	0.00220782	0.0300754
caudate	down	GO BP term	GO:0140053	mitochondrial gene expression	23	0.00222066	0.0301532
caudate	down	GO BP term	GO:0060079	excitatory postsynaptic potential	17	0.00222796	0.0301532
caudate	down	GO BP term	GO:0048172	regulation of short-term neuronal synaptic plasticity	5	0.00222993	0.0301532
caudate	down	GO BP term	GO:0006998	nuclear envelope organization	10	0.00225902	0.0304719
caudate	down	GO BP term	GO:0050805	negative regulation of synaptic transmission	14	0.00231082	0.031019
caudate	down	GO BP term	GO:0055117	regulation of cardiac muscle contraction	14	0.00231082	0.031019
caudate	down	GO BP term	GO:0010038	response to metal ion	43	0.00233694	0.0312935
caudate	down	GO BP term	GO:0007018	microtubule-based movement	34	0.00235304	0.0314327
caudate	down	GO BP term	GO:0071322	cellular response to carbohydrate stimulus	21	0.0023663	0.0314926
caudate	down	GO BP term	GO:0050770	regulation of axonogenesis	25	0.00236894	0.0314926
caudate	down	GO BP term	GO:0042176	regulation of protein catabolic process	47	0.00238372	0.0315605
caudate	down	GO BP term	GO:0070050	neuron cellular homeostasis	8	0.00239121	0.0315605
caudate	down	GO BP term	GO:0086019	cell-cell signaling involved in cardiac conduction	8	0.00239121	0.0315605
caudate	down	GO BP term	GO:0021544	subpallium development	7	0.00245571	0.0320617
caudate	down	GO BP term	GO:0035336	long-chain fatty-acyl-CoA metabolic process	7	0.00245571	0.0320617
caudate	down	GO BP term	GO:0046058	cAMP metabolic process	7	0.00245571	0.0320617
caudate	down	GO BP term	GO:0006997	nucleus organization	19	0.00245762	0.0320617
caudate	down	GO BP term	GO:0034766	negative regulation of ion transmembrane transport	17	0.00245824	0.0320617
caudate	down	GO BP term	GO:0002027	regulation of heart rate	16	0.00253649	0.0330042
caudate	down	GO BP term	GO:1903779	regulation of cardiac conduction	11	0.00257171	0.0333838
caudate	down	GO BP term	GO:0009108	coenzyme biosynthetic process	29	0.00265661	0.034405
caudate	down	GO BP term	GO:0046834	lipid phosphorylation	19	0.00268496	0.0346906
caudate	down	GO BP term	GO:0070997	neuron death	41	0.00273034	0.0351946
caudate	down	GO BP term	GO:0006665	sphingolipid metabolic process	24	0.00277093	0.0356346
caudate	down	GO BP term	GO:0010821	regulation of mitochondrion organization	26	0.00287631	0.0369038
caudate	down	GO BP term	GO:0006007	glucose catabolic process	8	0.00290692	0.0372099
caudate	down	GO BP term	GO:1905477	positive regulation of protein localization to membrane	19	0.00292963	0.0373997
caudate	down	GO BP term	GO:1902003	regulation of amyloid-beta formation	6	0.0029353	0.0373997
caudate	down	GO BP term	GO:0016482	cytosolic transport	23	0.00301092	0.0382747
caudate	down	GO BP term	GO:0006688	glycosphingolipid biosynthetic process	7	0.00307339	0.0386153
caudate	down	GO BP term	GO:0006735	NADH regeneration	7	0.00307339	0.0386153
caudate	down	GO BP term	GO:0061621	canonical glycolysis	7	0.00307339	0.0386153
caudate	down	GO BP term	GO:0061718	glucose catabolic process to pyruvate	7	0.00307339	0.0386153
caudate	down	GO BP term	GO:2000171	negative regulation of dendrite development	7	0.00307339	0.0386153
caudate	down	GO BP term	GO:1900271	regulation of long-term synaptic potentiation	10	0.00308117	0.0386153
caudate	down	GO BP term	GO:0060292	long-term synaptic depression	9	0.0030867	0.0386153
caudate	down	GO BP term	GO:0031109	microtubule polymerization or depolymerization	18	0.00310553	0.0387629
caudate	down	GO BP term	GO:1902993	positive regulation of amyloid precursor protein catabolic process	5	0.00314798	0.0392041
caudate	down	GO BP term	GO:0051480	regulation of cytosolic calcium ion concentration	41	0.0031668	0.0393496
caudate	down	GO BP term	GO:0140056	organelle localization by membrane tethering	24	0.00320082	0.039683
caudate	down	GO BP term	GO:0032413	negative regulation of ion transmembrane transporter activity	14	0.00324247	0.0400194
caudate	down	GO BP term	GO:0046785	microtubule polymerization	14	0.00324247	0.0400194
caudate	down	GO BP term	GO:0006661	phosphatidylinositol biosynthetic process	21	0.00326786	0.0402429
caudate	down	GO BP term	GO:0035966	response to topologically incorrect protein	28	0.00331764	0.0407649
caudate	down	GO BP term	GO:0048638	regulation of developmental growth	40	0.00334197	0.0409726
caudate	down	GO BP term	GO:0098664	G protein-coupled serotonin receptor signaling pathway	8	0.00350526	0.0428792
caudate	down	GO BP term	GO:0019935	cyclic-nucleotide-mediated signaling	28	0.00353345	0.0431285
caudate	down	GO BP term	GO:0010799	regulation of peptidyl-threonine phosphorylation	9	0.00363682	0.0442921
caudate	down	GO BP term	GO:0018210	peptidyl-threonine modification	18	0.00370465	0.0449199
caudate	down	GO BP term	GO:0031623	receptor internalization	18	0.00370465	0.0449199
caudate	down	GO BP term	GO:0019233	sensory perception of pain	16	0.00376347	0.0449283
caudate	down	GO BP term	GO:0006403	RNA localization	31	0.00377349	0.0449283
caudate	down	GO BP term	GO:0008637	apoptotic mitochondrial changes	19	0.00377791	0.0449283
caudate	down	GO BP term	GO:0001956	positive regulation of neurotransmitter secretion	6	0.00379302	0.0449283
caudate	down	GO BP term	GO:0008053	mitochondrial fusion	6	0.00379302	0.0449283
caudate	down	GO BP term	GO:0032402	melanosome transport	6	0.00379302	0.0449283
caudate	down	GO BP term	GO:0098884	postsynaptic neurotransmitter receptor internalization	6	0.00379302	0.0449283
caudate	down	GO BP term	GO:0140239	postsynaptic endocytosis	6	0.00379302	0.0449283
caudate	down	GO BP term	GO:0048169	regulation of long-term neuronal synaptic plasticity	7	0.00380306	0.0449283
caudate	down	GO BP term	GO:0061615	glycolytic process through fructose-6-phosphate	7	0.00380306	0.0449283
caudate	down	GO BP term	GO:0061620	glycolytic process through glucose-6-phosphate	7	0.00380306	0.0449283
caudate	down	GO BP term	GO:0099590	neurotransmitter receptor internalization	7	0.00380306	0.0449283
caudate	down	GO BP term	GO:0030041	actin filament polymerization	25	0.00386019	0.0455057
caudate	down	GO BP term	GO:0019319	hexose biosynthetic process	15	0.00391228	0.0460215
caudate	down	GO BP term	GO:0043279	response to alkaloid	17	0.00392786	0.0461064
caudate	down	GO BP term	GO:1990535	neuron projection maintenance	4	0.00396724	0.0463713
caudate	down	GO BP term	GO:2000302	positive regulation of synaptic vesicle exocytosis	4	0.00396724	0.0463713
caudate	down	GO BP term	GO:0032886	regulation of microtubule-based process	28	0.00400084	0.0466652
caudate	down	GO BP term	GO:0071242	cellular response to ammonium ion	13	0.00406551	0.0473194
caudate	down	GO BP term	GO:0008277	regulation of G protein-coupled receptor signaling pathway	21	0.00411893	0.0476157
caudate	down	GO BP term	GO:0043524	negative regulation of neuron apoptotic process	21	0.00411893	0.0476157
caudate	down	GO BP term	GO:0042982	amyloid precursor protein metabolic process	10	0.00412549	0.0476157
caudate	down	GO BP term	GO:0097366	response to bronchodilator	10	0.00412549	0.0476157
caudate	down	GO BP term	GO:0006101	citrate metabolic process	8	0.00419469	0.0482127
caudate	down	GO BP term	GO:0045070	positive regulation of viral genome replication	8	0.00419469	0.0482127
caudate	down	GO BP term	GO:0007212	dopamine receptor signaling pathway	9	0.00426092	0.0488246
caudate	down	GO BP term	GO:0070252	actin-mediated cell contraction	17	0.00429479	0.0488246
caudate	down	GO BP term	GO:0018410	C-terminal protein amino acid modification	5	0.00430988	0.0488246
caudate	down	GO BP term	GO:0030397	membrane disassembly	5	0.00430988	0.0488246
caudate	down	GO BP term	GO:0045056	transcytosis	5	0.00430988	0.0488246
caudate	down	GO BP term	GO:0051081	nuclear envelope disassembly	5	0.00430988	0.0488246
caudate	down	GO BP term	GO:1901841	regulation of high voltage-gated calcium channel activity	5	0.00430988	0.0488246
caudate	down	GO BP term	GO:1904063	negative regulation of cation transmembrane transport	15	0.00431902	0.0488279
caudate	down	GO BP term	GO:0097345	mitochondrial outer membrane permeabilization	11	0.00441037	0.0497587
caudate	down	KEGG pathway	hsa04114	Oocyte meiosis	49	4.7851e-12	1.43075e-09
caudate	down	KEGG pathway	hsa04020	Calcium signaling pathway	63	6.50266e-11	7.73337e-09
caudate	down	KEGG pathway	hsa05010	Alzheimer disease	59	8.56356e-11	7.73337e-09
caudate	down	KEGG pathway	hsa04261	Adrenergic signaling in cardiomyocytes	53	1.03456e-10	7.73337e-09
caudate	down	KEGG pathway	hsa04727	GABAergic synapse	38	2.06823e-10	1.2368e-08
caudate	down	KEGG pathway	hsa04970	Salivary secretion	36	9.91978e-10	4.94336e-08
caudate	down	KEGG pathway	hsa04723	Retrograde endocannabinoid signaling	50	3.01264e-09	1.28683e-07
caudate	down	KEGG pathway	hsa04728	Dopaminergic synapse	47	6.69268e-09	2.50139e-07
caudate	down	KEGG pathway	hsa04713	Circadian entrainment	38	1.59781e-08	5.03989e-07
caudate	down	KEGG pathway	hsa04921	Oxytocin signaling pathway	50	1.68558e-08	5.03989e-07
caudate	down	KEGG pathway	hsa04070	Phosphatidylinositol signaling system	37	2.03158e-08	5.2865e-07
caudate	down	KEGG pathway	hsa04721	Synaptic vesicle cycle	31	2.12167e-08	5.2865e-07
caudate	down	KEGG pathway	hsa04141	Protein processing in endoplasmic reticulum	53	3.09693e-08	7.12294e-07
caudate	down	KEGG pathway	hsa05016	Huntington disease	56	3.92166e-08	8.37555e-07
caudate	down	KEGG pathway	hsa00190	Oxidative phosphorylation	44	8.65512e-08	1.72525e-06
caudate	down	KEGG pathway	hsa03050	Proteasome	23	9.51175e-08	1.77751e-06
caudate	down	KEGG pathway	hsa04720	Long-term potentiation	29	1.9122e-07	3.36322e-06
caudate	down	KEGG pathway	hsa04022	cGMP-PKG signaling pathway	50	2.69338e-07	4.47401e-06
caudate	down	KEGG pathway	hsa04120	Ubiquitin mediated proteolysis	41	3.58063e-07	5.63478e-06
caudate	down	KEGG pathway	hsa05032	Morphine addiction	32	7.86967e-07	1.17652e-05
caudate	down	KEGG pathway	hsa00970	Aminoacyl-tRNA biosynthesis	19	1.07664e-06	1.53293e-05
caudate	down	KEGG pathway	hsa04925	Aldosterone synthesis and secretion	35	1.148e-06	1.56024e-05
caudate	down	KEGG pathway	hsa05110	Vibrio cholerae infection	23	2.03259e-06	2.64237e-05
caudate	down	KEGG pathway	hsa04961	Endocrine and other factor-regulated calcium reabsorption	20	2.79928e-06	3.48744e-05
caudate	down	KEGG pathway	hsa05012	Parkinson disease	43	3.09969e-06	3.70723e-05
caudate	down	KEGG pathway	hsa04726	Serotonergic synapse	36	3.37244e-06	3.87831e-05
caudate	down	KEGG pathway	hsa05033	Nicotine addiction	17	7.40226e-06	8.19732e-05
caudate	down	KEGG pathway	hsa04371	Apelin signaling pathway	42	8.39987e-06	8.96986e-05
caudate	down	KEGG pathway	hsa04724	Glutamatergic synapse	35	1.94739e-05	0.000200783
caudate	down	KEGG pathway	hsa04540	Gap junction	28	3.02541e-05	0.000291806
caudate	down	KEGG pathway	hsa05132	Salmonella infection	28	3.02541e-05	0.000291806
caudate	down	KEGG pathway	hsa04140	Autophagy - animal	37	3.72989e-05	0.000348511
caudate	down	KEGG pathway	hsa04024	cAMP signaling pathway	55	4.31379e-05	0.000390856
caudate	down	KEGG pathway	hsa04725	Cholinergic synapse	34	6.01885e-05	0.000529305
caudate	down	KEGG pathway	hsa00562	Inositol phosphate metabolism	24	6.66638e-05	0.000569499
caudate	down	KEGG pathway	hsa04260	Cardiac muscle contraction	23	0.00013824	0.00110548
caudate	down	KEGG pathway	hsa05120	Epithelial cell signaling in Helicobacter pylori infection	23	0.00013824	0.00110548
caudate	down	KEGG pathway	hsa04971	Gastric acid secretion	24	0.000140495	0.00110548
caudate	down	KEGG pathway	hsa04150	mTOR signaling pathway	37	0.000244802	0.00187681
caudate	down	KEGG pathway	hsa04962	Vasopressin-regulated water reabsorption	17	0.000261884	0.00195759
caudate	down	KEGG pathway	hsa00020	Citrate cycle (TCA cycle)	14	0.000304452	0.00222027
caudate	down	KEGG pathway	hsa04714	Thermogenesis	53	0.00035775	0.00254684
caudate	down	KEGG pathway	hsa04136	Autophagy - other	13	0.0003805	0.0026458
caudate	down	KEGG pathway	hsa04966	Collecting duct acid secretion	12	0.000470096	0.00319452
caudate	down	KEGG pathway	hsa00620	Pyruvate metabolism	15	0.000526847	0.0035006
caudate	down	KEGG pathway	hsa04068	FoxO signaling pathway	34	0.000712092	0.0046286
caudate	down	KEGG pathway	hsa05131	Shigellosis	21	0.000839387	0.00532949
caudate	down	KEGG pathway	hsa04730	Long-term depression	20	0.000855571	0.00532949
caudate	down	KEGG pathway	hsa04710	Circadian rhythm	13	0.0010625	0.00648341
caudate	down	KEGG pathway	hsa04932	Non-alcoholic fatty liver disease (NAFLD)	36	0.00109682	0.00655901
caudate	down	KEGG pathway	hsa04211	Longevity regulating pathway	25	0.0012486	0.00732021
caudate	down	KEGG pathway	hsa05034	Alcoholism	35	0.00130086	0.00747995
caudate	down	KEGG pathway	hsa04914	Progesterone-mediated oocyte maturation	25	0.001538	0.00867667
caudate	down	KEGG pathway	hsa00430	Taurine and hypotaurine metabolism	7	0.00172516	0.0095523
caudate	down	KEGG pathway	hsa04960	Aldosterone-regulated sodium reabsorption	13	0.00216671	0.011779
caudate	down	KEGG pathway	hsa05170	Human immunodeficiency virus 1 infection	46	0.00250798	0.0133883
caudate	down	KEGG pathway	hsa04926	Relaxin signaling pathway	32	0.00255229	0.0133883
caudate	down	KEGG pathway	hsa04919	Thyroid hormone signaling pathway	29	0.00260417	0.0134249
caudate	down	KEGG pathway	hsa04972	Pancreatic secretion	25	0.00334216	0.0166834
caudate	down	KEGG pathway	hsa04071	Sphingolipid signaling pathway	29	0.00334785	0.0166834
caudate	down	KEGG pathway	hsa04810	Regulation of actin cytoskeleton	47	0.00347516	0.017034
caudate	down	KEGG pathway	hsa05031	Amphetamine addiction	20	0.00359536	0.0173389
caudate	down	KEGG pathway	hsa04910	Insulin signaling pathway	32	0.00405326	0.0192369
caudate	down	KEGG pathway	hsa03015	mRNA surveillance pathway	21	0.00413575	0.0193217
caudate	down	KEGG pathway	hsa01200	Carbon metabolism	30	0.00420314	0.0193344
caudate	down	KEGG pathway	hsa00220	Arginine biosynthesis	9	0.00435859	0.0197457
caudate	down	KEGG pathway	hsa05014	Amyotrophic lateral sclerosis (ALS)	16	0.00443637	0.0197982
caudate	down	KEGG pathway	hsa04014	Ras signaling pathway	47	0.005483	0.0241091
caudate	down	KEGG pathway	hsa05231	Choline metabolism in cancer	24	0.00618489	0.0268012
caudate	down	KEGG pathway	hsa04152	AMPK signaling pathway	28	0.00638672	0.027017
caudate	down	KEGG pathway	hsa03013	RNA transport	31	0.00641541	0.027017
caudate	down	KEGG pathway	hsa05130	Pathogenic Escherichia coli infection	16	0.00710762	0.0295164
caudate	down	KEGG pathway	hsa05214	Glioma	20	0.00727439	0.0297951
caudate	down	KEGG pathway	hsa04270	Vascular smooth muscle contraction	29	0.00779219	0.0314847
caudate	down	KEGG pathway	hsa01230	Biosynthesis of amino acids	20	0.00798918	0.0318502
caudate	down	KEGG pathway	hsa04110	Cell cycle	29	0.00836734	0.0329189
caudate	down	KEGG pathway	hsa05211	Renal cell carcinoma	20	0.00875987	0.033692
caudate	down	KEGG pathway	hsa04911	Insulin secretion	21	0.00878923	0.033692
caudate	down	KEGG pathway	hsa04750	Inflammatory mediator regulation of TRP channels	23	0.00945083	0.0357696
caudate	down	KEGG pathway	hsa01210	2-Oxocarboxylic acid metabolism	7	0.0109912	0.0410797
caudate	down	KEGG pathway	hsa04964	Proximal tubule bicarbonate reclamation	8	0.0123265	0.0455014
hippocampus	up	GO BP term	GO:0030049	muscle filament sliding	10	2.24159e-13	2.02864e-10
hippocampus	up	GO BP term	GO:0033275	actin-myosin filament sliding	10	2.24159e-13	2.02864e-10
hippocampus	up	GO BP term	GO:0055008	cardiac muscle tissue morphogenesis	9	2.64423e-09	1.59535e-06
hippocampus	up	GO BP term	GO:0060415	muscle tissue morphogenesis	9	1.23012e-08	5.56628e-06
hippocampus	up	GO BP term	GO:0070252	actin-mediated cell contraction	10	1.9086e-08	6.9067e-06
hippocampus	up	GO BP term	GO:0048644	muscle organ morphogenesis	9	2.28951e-08	6.9067e-06
hippocampus	up	GO BP term	GO:0030048	actin filament-based movement	10	1.2112e-07	2.78209e-05
hippocampus	up	GO BP term	GO:0003012	muscle system process	17	1.22965e-07	2.78209e-05
hippocampus	up	GO BP term	GO:0006936	muscle contraction	14	5.88477e-07	0.000118349
hippocampus	up	GO BP term	GO:0043501	skeletal muscle adaptation	5	1.58164e-06	0.000286277
hippocampus	up	GO BP term	GO:0048738	cardiac muscle tissue development	11	2.07463e-06	0.000341371
hippocampus	up	GO BP term	GO:0014706	striated muscle tissue development	14	2.35928e-06	0.000355858
hippocampus	up	GO BP term	GO:0060537	muscle tissue development	14	3.69396e-06	0.000514313
hippocampus	up	GO BP term	GO:0003007	heart morphogenesis	11	4.16378e-06	0.000538317
hippocampus	up	GO BP term	GO:0014888	striated muscle adaptation	6	4.77302e-06	0.000561838
hippocampus	up	GO BP term	GO:0007517	muscle organ development	14	4.96652e-06	0.000561838
hippocampus	up	GO BP term	GO:0003231	cardiac ventricle development	8	5.31289e-06	0.000565666
hippocampus	up	GO BP term	GO:0043500	muscle adaptation	8	7.47723e-06	0.000751877
hippocampus	up	GO BP term	GO:0042692	muscle cell differentiation	13	1.15187e-05	0.00109731
hippocampus	up	GO BP term	GO:0030239	myofibril assembly	6	1.32081e-05	0.00119533
hippocampus	up	GO BP term	GO:0055010	ventricular cardiac muscle tissue morphogenesis	5	2.6628e-05	0.00229508
hippocampus	up	GO BP term	GO:0003205	cardiac chamber development	8	4.24114e-05	0.0034893
hippocampus	up	GO BP term	GO:0006941	striated muscle contraction	8	5.21459e-05	0.00396894
hippocampus	up	GO BP term	GO:0003229	ventricular cardiac muscle tissue development	5	5.26268e-05	0.00396894
hippocampus	up	GO BP term	GO:0003206	cardiac chamber morphogenesis	7	5.73909e-05	0.0041551
hippocampus	up	GO BP term	GO:0014883	transition between fast and slow fiber	3	6.55845e-05	0.00456569
hippocampus	up	GO BP term	GO:0045646	regulation of erythrocyte differentiation	5	8.08353e-05	0.00541896
hippocampus	up	GO BP term	GO:0051146	striated muscle cell differentiation	10	0.000103658	0.00670074
hippocampus	up	GO BP term	GO:0010927	cellular component assembly involved in morphogenesis	6	0.000157567	0.00983435
hippocampus	up	GO BP term	GO:0010273	detoxification of copper ion	3	0.000176904	0.0100061
hippocampus	up	GO BP term	GO:0030240	skeletal muscle thin filament assembly	3	0.000176904	0.0100061
hippocampus	up	GO BP term	GO:1990169	stress response to copper ion	3	0.000176904	0.0100061
hippocampus	up	GO BP term	GO:0014733	regulation of skeletal muscle adaptation	3	0.00021653	0.0113906
hippocampus	up	GO BP term	GO:0061687	detoxification of inorganic compound	3	0.00021653	0.0113906
hippocampus	up	GO BP term	GO:0003208	cardiac ventricle morphogenesis	5	0.000222911	0.0113906
hippocampus	up	GO BP term	GO:0045648	positive regulation of erythrocyte differentiation	4	0.000226554	0.0113906
hippocampus	up	GO BP term	GO:0097501	stress response to metal ion	3	0.000261483	0.0127284
hippocampus	up	GO BP term	GO:0003009	skeletal muscle contraction	4	0.000274258	0.0127284
hippocampus	up	GO BP term	GO:0006882	cellular zinc ion homeostasis	4	0.000274258	0.0127284
hippocampus	up	GO BP term	GO:0014866	skeletal myofibril assembly	3	0.000312054	0.0141205
hippocampus	up	GO BP term	GO:0055069	zinc ion homeostasis	4	0.000328775	0.014457
hippocampus	up	GO BP term	GO:0050792	regulation of viral process	8	0.000335467	0.014457
hippocampus	up	GO BP term	GO:0055002	striated muscle cell development	7	0.000388159	0.0163388
hippocampus	up	GO BP term	GO:0045214	sarcomere organization	4	0.000424506	0.0174626
hippocampus	up	GO BP term	GO:0055001	muscle cell development	7	0.000611637	0.0241032
hippocampus	up	GO BP term	GO:0048525	negative regulation of viral process	6	0.000619327	0.0241032
hippocampus	up	GO BP term	GO:0010038	response to metal ion	10	0.000625884	0.0241032
hippocampus	up	GO BP term	GO:0030218	erythrocyte differentiation	6	0.000643314	0.0242583
hippocampus	up	GO BP term	GO:0071294	cellular response to zinc ion	3	0.000658869	0.0243378
hippocampus	up	GO BP term	GO:0050879	multicellular organismal movement	4	0.000774826	0.0274987
hippocampus	up	GO BP term	GO:0050881	musculoskeletal movement	4	0.000774826	0.0274987
hippocampus	up	GO BP term	GO:0043903	regulation of symbiosis, encompassing mutualism through parasitism	8	0.000837404	0.0291481
hippocampus	up	GO BP term	GO:0034101	erythrocyte homeostasis	6	0.000957552	0.0327013
hippocampus	up	GO BP term	GO:0090257	regulation of muscle system process	8	0.000992456	0.0332656
hippocampus	up	GO BP term	GO:0055003	cardiac myofibril assembly	3	0.00106452	0.0350324
hippocampus	up	GO BP term	GO:0046782	regulation of viral transcription	4	0.00137005	0.044282
hippocampus	up	GO BP term	GO:0048747	muscle fiber development	4	0.00145145	0.04609
hippocampus	up	KEGG pathway	hsa05410	Hypertrophic cardiomyopathy (HCM)	7	0.00012931	0.0137678
hippocampus	up	KEGG pathway	hsa05414	Dilated cardiomyopathy (DCM)	7	0.0001886	0.0137678
hippocampus	up	KEGG pathway	hsa00330	Arginine and proline metabolism	5	0.000501833	0.0244225
hippocampus	down	GO BP term	GO:0099003	vesicle-mediated transport in synapse	12	3.2992e-06	0.00592827
hippocampus	down	GO BP term	GO:0048813	dendrite morphogenesis	10	4.01237e-06	0.00592827
hippocampus	down	GO BP term	GO:0072583	clathrin-dependent endocytosis	6	6.7915e-06	0.00668963
hippocampus	down	GO BP term	GO:0099504	synaptic vesicle cycle	11	1.17559e-05	0.00868465
hippocampus	down	GO BP term	GO:0051650	establishment of vesicle localization	13	2.2449e-05	0.0118589
hippocampus	down	GO BP term	GO:0048488	synaptic vesicle endocytosis	6	2.80921e-05	0.0118589
hippocampus	down	GO BP term	GO:0140238	presynaptic endocytosis	6	2.80921e-05	0.0118589
hippocampus	down	GO BP term	GO:0051648	vesicle localization	13	4.09139e-05	0.0151126
hippocampus	down	GO BP term	GO:0016358	dendrite development	11	5.92717e-05	0.0194609
hippocampus	down	GO BP term	GO:0036465	synaptic vesicle recycling	6	9.24748e-05	0.0273263
hippocampus	down	GO BP term	GO:0006470	protein dephosphorylation	13	0.000166528	0.0447354
hippocampus	down	KEGG pathway	hsa01200	Carbon metabolism	12	1.86137e-05	0.00340631
hippocampus	down	KEGG pathway	hsa01230	Biosynthesis of amino acids	9	4.88881e-05	0.00447326
hippocampus	down	KEGG pathway	hsa00072	Synthesis and degradation of ketone bodies	4	8.17383e-05	0.00498604
hippocampus	down	KEGG pathway	hsa04141	Protein processing in endoplasmic reticulum	12	0.000294055	0.013453
hippocampus	down	KEGG pathway	hsa01210	2-Oxocarboxylic acid metabolism	4	0.000539447	0.0197438
hippocampus	down	KEGG pathway	hsa00280	Valine, leucine and isoleucine degradation	6	0.000783529	0.0238263
hippocampus	down	KEGG pathway	hsa00020	Citrate cycle (TCA cycle)	5	0.00091139	0.0238263
hippocampus	down	KEGG pathway	hsa04070	Phosphatidylinositol signaling system	8	0.00118918	0.0272024
hippocampus	down	KEGG pathway	hsa04744	Phototransduction	4	0.00163923	0.033331
hippocampus	down	KEGG pathway	hsa04020	Calcium signaling pathway	11	0.00239639	0.0438539
