# Supplementary material for: Comprehensive transcriptomic analysis indicates brain regional specific alterations in type 2 diabetes
Source: Aging (Albany NY). 2019 Aug 26;11(16):6398–421. doi: 10.18632/aging.102196 (PMC6738403; doi:10.18632/aging.102196)
Supplement: Supplementary Table 4 [file aging-11-102196-s008.xlsx]

## Sheet: Sheet1
Supplementary Table 4. Membership information for all assigned genes in caudate
Gene	Module	GS.T2D	MMblack	MMturquoise	MMgreenyellow	MMsalmon	MMmagenta	MMcyan	MMpink	MMgreen	MMtan	MMblue	MMpurple	MMred	MMbrown	MMyellow
KRIT1	black	-0.146253	0.791361	0.00348901	-0.202739	-0.416348	-0.660599	-0.526412	-0.610611	-0.267524	-0.0617629	-0.0125766	0.0600193	0.305981	-0.201003	0.462531
CDC27	black	-0.223695	0.869023	0.273474	-0.193137	-0.377914	-0.604243	-0.684892	-0.735153	-0.397845	-0.0334079	-0.291701	-0.205151	0.0502378	-0.319349	0.277395
IBTK	black	-0.15817	0.736942	0.297528	-0.582199	-0.663942	-0.490384	-0.478748	-0.76199	-0.540588	-0.268807	-0.0704081	-0.127835	0.121764	-0.418011	0.0305845
PHTF2	black	-0.160009	0.676494	0.430499	-0.482797	-0.455297	-0.321353	-0.411562	-0.647027	-0.560398	-0.288667	-0.272159	-0.226425	0.0935434	-0.517235	-0.0684834
VTA1	black	-0.367444	0.807649	0.230118	-0.0762786	-0.25874	-0.521906	-0.63505	-0.616914	-0.396595	-0.111362	-0.159542	-0.192151	0.157192	-0.291209	0.258955
MBTPS2	black	-0.115349	0.616238	-0.203255	-0.204275	-0.538268	-0.721296	-0.45172	-0.526273	-0.0511033	0.0343971	0.148992	0.196281	0.435335	0.0298584	0.555062
RNF14	black	-0.271394	0.797602	0.195512	-0.264716	-0.437107	-0.566788	-0.487616	-0.682598	-0.492445	-0.246165	-0.141	-0.0864952	0.238307	-0.301416	0.241662
ZMYND11	black	-0.0539922	0.789392	-0.0404379	-0.202569	-0.473094	-0.717944	-0.462464	-0.632006	-0.107562	0.170985	-0.0599661	0.10945	0.176665	-0.142626	0.553824
RUFY3	black	-0.207678	0.731535	0.462579	-0.298812	-0.299145	-0.372768	-0.424	-0.651066	-0.682806	-0.380126	-0.276282	-0.204154	0.359912	-0.568394	0.0151382
RB1CC1	black	-0.149073	0.757678	0.355664	-0.206631	-0.287051	-0.465414	-0.532544	-0.664694	-0.401478	0.00276935	-0.243583	-0.151976	0.0275834	-0.472334	0.177463
VEZT	black	-0.183205	0.694221	0.014465	-0.375981	-0.619716	-0.648223	-0.521536	-0.658722	-0.144346	0.0707501	0.0351016	-0.0676871	-0.0103911	-0.140077	0.334075
BCLAF1	black	-0.221945	0.788046	0.151312	-0.29289	-0.495651	-0.529421	-0.569242	-0.663718	-0.421765	-0.209082	-0.0271978	-0.211176	0.124664	-0.275083	0.232877
FAM13B	black	-0.229786	0.72857	0.501166	-0.300878	-0.219827	-0.28637	-0.459398	-0.62927	-0.661863	-0.25835	-0.267607	-0.0973639	0.103754	-0.609216	-0.0176277
ADSS	black	-0.204168	0.805498	0.168133	-0.284317	-0.40907	-0.475446	-0.433832	-0.589759	-0.580281	-0.427163	0.0228646	-0.0438368	0.442368	-0.341978	0.239451
SKIV2L2	black	-0.178112	0.734405	-0.011772	-0.172397	-0.415171	-0.633835	-0.462756	-0.562974	-0.283466	-0.109606	-0.0463164	0.0627365	0.335289	-0.139212	0.455061
YTHDC2	black	-0.241181	0.692598	0.340292	-0.242507	-0.371646	-0.344513	-0.49945	-0.624931	-0.465623	-0.16614	-0.202607	-0.309306	-0.112859	-0.383204	0.00428427
POLR2B	black	-0.269906	0.731792	0.292868	-0.254432	-0.321415	-0.430719	-0.509958	-0.617845	-0.329241	0.0277246	-0.247407	-0.119708	-0.0264178	-0.349903	0.156486
ARAP2	black	-0.19495	0.77168	0.00965756	-0.0339551	-0.250362	-0.561151	-0.419244	-0.470395	-0.331974	-0.170318	-0.233024	-0.0405878	0.475432	-0.0991403	0.490924
AP5M1	black	-0.274341	0.741244	0.0918341	0.0874765	-0.125679	-0.536365	-0.514131	-0.475451	-0.275356	-0.0522689	-0.209057	-0.0418867	0.203771	-0.163324	0.428047
PUM2	black	-0.117595	0.708282	0.0736208	0.117769	-0.0667392	-0.604957	-0.488352	-0.503339	-0.238512	0.0164581	-0.127186	-0.0558302	0.191048	-0.246728	0.483548
RC3H2	black	-0.309423	0.832155	0.386684	-0.173912	-0.253497	-0.438054	-0.519928	-0.645879	-0.509804	-0.129491	-0.399749	-0.18508	0.0645916	-0.417868	0.154612
APPBP2	black	-0.244493	0.793868	0.197001	0.0611206	-0.127127	-0.555593	-0.617182	-0.554985	-0.205518	0.142933	-0.353697	-0.261664	0.179321	-0.244076	0.422135
BTBD1	black	-0.296437	0.711224	-0.023583	-0.0268903	-0.31069	-0.598509	-0.532016	-0.50761	-0.045324	0.179824	-0.162222	-0.0337123	0.0943917	0.00219832	0.457037
CYB5R4	black	-0.216156	0.727264	0.256948	-0.152346	-0.246145	-0.377461	-0.437011	-0.531128	-0.521858	-0.290288	-0.289898	-0.0620248	0.228493	-0.280376	0.184778
ZBTB11	black	-0.287534	0.780973	0.498412	0.0686275	0.0180615	-0.283878	-0.567169	-0.554066	-0.586333	-0.184085	-0.430257	-0.462321	0.0625699	-0.500202	0.069156
THUMPD1	black	-0.145278	0.794729	0.427133	-0.381483	-0.403534	-0.480519	-0.616117	-0.779444	-0.423725	0.00380751	-0.226229	-0.302756	-0.135948	-0.596083	0.065584
ATG2B	black	-0.204002	0.781547	0.476398	-0.223426	-0.20009	-0.391487	-0.568078	-0.662291	-0.517193	-0.123179	-0.409356	-0.384817	0.127503	-0.583488	0.0741204
ARFGEF1	black	-0.155508	0.773746	-0.000643729	-0.0389411	-0.291888	-0.696952	-0.580011	-0.587605	-0.106599	0.162621	-0.164645	-0.0347183	0.0662646	-0.136953	0.514739
DHX29	black	-0.231961	0.736171	0.142831	-0.236337	-0.387503	-0.486305	-0.429189	-0.55396	-0.391057	-0.201019	-0.203702	-0.0645745	0.310555	-0.240296	0.260502
MEF2A	black	-0.241351	0.724921	0.322209	-0.455034	-0.498963	-0.425622	-0.497506	-0.70082	-0.491252	-0.176006	-0.0966988	0.0083199	0.0139664	-0.446622	0.0503867
ACSL4	black	-0.401113	0.704591	0.41923	-0.0245419	-0.104905	-0.261819	-0.462358	-0.508914	-0.659976	-0.378643	-0.338311	-0.292758	0.23613	-0.39189	0.0180482
SEL1L	black	-0.294835	0.842357	0.0957468	0.0592425	-0.195814	-0.610441	-0.587339	-0.558767	-0.319417	-0.0638534	-0.239315	-0.125634	0.335855	-0.149262	0.468421
AFF4	black	-0.24608	0.799141	0.05222	0.0645734	-0.2321	-0.601171	-0.610872	-0.53964	-0.136252	0.134654	-0.259994	-0.330625	0.105474	-0.0882593	0.495198
DPP8	black	-0.107431	0.761019	0.282681	-0.505513	-0.658604	-0.61463	-0.644165	-0.831715	-0.161501	0.289034	-0.126627	-0.111436	-0.15079	-0.421787	0.178233
ACTR6	black	-0.152937	0.737732	0.105903	-0.141275	-0.314135	-0.53369	-0.47136	-0.553524	-0.451516	-0.308887	0.0725867	-0.0964043	0.274585	-0.258739	0.286778
EIF4G3	black	-0.120779	0.684753	0.415345	-0.458851	-0.417146	-0.397783	-0.495606	-0.713946	-0.594208	-0.219112	-0.0460274	0.00661303	0.119192	-0.609769	0.00796381
DLG1	black	-0.197986	0.751851	0.0717544	-0.0446974	-0.241454	-0.572631	-0.391093	-0.527469	-0.508427	-0.353817	-0.164247	0.019098	0.521314	-0.188436	0.426671
BCAP29	black	-0.202236	0.704488	0.283558	-0.495224	-0.613374	-0.526492	-0.543634	-0.748798	-0.347849	-0.00319243	-0.150264	-0.0780759	-0.0262355	-0.357735	0.0822143
KLHL20	black	-0.0830366	0.664143	-0.0804298	-0.224938	-0.481218	-0.642236	-0.49553	-0.562311	-0.0898738	0.0878719	0.0973545	0.0916232	0.0944059	-0.0604723	0.48194
PIK3C3	black	-0.135177	0.784616	0.422043	-0.501258	-0.532639	-0.490519	-0.524178	-0.800329	-0.434301	0.0222432	-0.238643	-0.13099	-0.0128885	-0.558754	0.0551523
RIF1	black	-0.198414	0.806904	0.129336	-0.0629696	-0.227786	-0.533563	-0.450571	-0.536915	-0.398625	-0.173725	-0.230729	-0.142541	0.268969	-0.247388	0.381205
PCNP	black	-0.173733	0.819257	-0.00211514	-0.191359	-0.461386	-0.68451	-0.476511	-0.635116	-0.262444	-0.0584836	0.0490634	-0.0316009	0.21803	-0.178514	0.469881
ZNF510	black	-0.166089	0.763821	0.528807	-0.199433	-0.178642	-0.406206	-0.650634	-0.717023	-0.469077	0.00502287	-0.377286	-0.334398	-0.0443496	-0.619885	0.0509002
CCNT2	black	-0.186814	0.749407	0.170065	0.0810243	-0.13089	-0.491159	-0.556979	-0.53222	-0.326435	-0.0642998	-0.227166	-0.308313	0.0713336	-0.261946	0.31658
DIS3	black	-0.14172	0.691674	0.0305092	-0.306605	-0.52114	-0.607236	-0.503953	-0.6109	-0.150869	0.0615155	-0.147725	-0.16424	0.036082	-0.109945	0.349296
PDS5B	black	-0.256594	0.726123	0.337448	0.105003	0.050468	-0.387132	-0.545726	-0.498133	-0.402144	-0.0741407	-0.316329	-0.245981	0.0103865	-0.399814	0.214062
CHMP2B	black	-0.185825	0.774591	0.0578169	-0.241124	-0.482674	-0.577816	-0.527802	-0.614948	-0.386047	-0.205001	0.0194947	-0.0481978	0.352592	-0.191751	0.320784
DIMT1	black	-0.0350403	0.633355	-0.15105	-0.505196	-0.788651	-0.72362	-0.39232	-0.639866	-0.167033	-0.0910454	0.184244	0.208256	0.315883	-0.0461165	0.415333
HECTD1	black	-0.237202	0.83969	0.352649	-0.176918	-0.284067	-0.527186	-0.612688	-0.70405	-0.357678	0.0977462	-0.363564	-0.236611	-0.00110859	-0.42764	0.237132
SUCO	black	-0.118166	0.686241	-0.0809624	-0.104499	-0.446861	-0.696766	-0.538152	-0.566818	-0.0294345	0.150696	-0.00858606	-0.115826	0.17602	-0.0486102	0.490766
RAB18	black	-0.24658	0.711315	0.166332	-0.204559	-0.4179	-0.558654	-0.618043	-0.619494	-0.0191139	0.312398	-0.179657	-0.282128	-0.107271	-0.224936	0.307754
PPM1A	black	-0.274939	0.870216	0.244055	-0.0823678	-0.231617	-0.602448	-0.649304	-0.66632	-0.318063	0.054557	-0.260294	-0.147242	0.122005	-0.363021	0.378163
PCNX	black	-0.216392	0.745331	0.351032	-0.170657	-0.251586	-0.39391	-0.608332	-0.615362	-0.394076	0.0113898	-0.243295	-0.333517	-0.0714425	-0.407847	0.132221
FNDC3A	black	-0.225032	0.797566	0.184669	-0.155214	-0.341757	-0.565286	-0.598206	-0.62357	-0.233165	0.114473	-0.200453	-0.226005	0.0772398	-0.286101	0.366508
KPNA3	black	-0.200667	0.727165	-0.0390888	0.00353741	-0.301786	-0.649367	-0.627125	-0.511348	0.0472156	0.288236	-0.158955	-0.173778	0.0617906	-0.0119741	0.522733
NBN	black	-0.173491	0.696059	0.0536159	-0.271689	-0.458278	-0.58291	-0.599368	-0.603153	-0.177095	0.0405155	-0.0563188	-0.170161	0.111767	-0.169968	0.338074
IMPAD1	black	-0.189312	0.739214	0.156489	-0.311757	-0.522939	-0.594655	-0.56648	-0.681168	-0.220154	0.104747	-0.203785	-0.133003	0.145993	-0.214332	0.285907
ARMC1	black	-0.270645	0.722452	0.329342	-0.174832	-0.215194	-0.387831	-0.461635	-0.551292	-0.595298	-0.379212	-0.149882	-0.0629687	0.387455	-0.433094	0.147185
CBLL1	black	-0.211843	0.728789	0.0250486	0.120393	-0.100754	-0.575852	-0.487154	-0.460222	-0.203711	-0.0210178	-0.242496	-0.119006	0.299659	-0.109304	0.495099
FKTN	black	-0.134742	0.730187	0.139906	-0.450935	-0.636318	-0.624562	-0.544377	-0.724058	-0.276677	0.00554834	-0.0265045	-0.0393184	0.156573	-0.3145	0.273875
KIAA1432	black	-0.164422	0.776106	0.116466	-0.16908	-0.365511	-0.573687	-0.581593	-0.607407	-0.250281	0.00428177	-0.164086	-0.121544	0.131862	-0.212617	0.382923
MAPK8	black	-0.126431	0.69656	0.317997	-0.107486	-0.237789	-0.48922	-0.494952	-0.635135	-0.330175	0.0332546	-0.287735	-0.265833	0.0202002	-0.4166	0.169334
PLEKHA1	black	-0.313465	0.710029	0.438926	-0.0596443	-0.0128783	-0.234098	-0.412776	-0.466215	-0.66822	-0.424309	-0.428188	-0.298318	0.318993	-0.453432	0.0588875
CCSER2	black	-0.350564	0.837294	0.417892	-0.255721	-0.340607	-0.46752	-0.613156	-0.71622	-0.540928	-0.126029	-0.30014	-0.139555	0.136365	-0.473736	0.137147
CCDC47	black	-0.405472	0.714106	0.395264	-0.201084	-0.241578	-0.276361	-0.571354	-0.562514	-0.34992	0.0432431	-0.361288	-0.340157	-0.0873545	-0.349917	0.0461096
PRKAR1A	black	-0.24043	0.775759	0.182529	-0.323354	-0.51207	-0.551684	-0.540894	-0.681043	-0.351169	-0.0735566	-0.000922548	-0.123893	0.0859981	-0.310542	0.225929
RAPGEF2	black	-0.138921	0.694851	0.0338612	-0.0325667	-0.240645	-0.593034	-0.541672	-0.531152	-0.0794627	0.232798	-0.0950136	0.0145354	0.018368	-0.16127	0.487025
NAA25	black	-0.28504	0.750009	0.474458	-0.189273	-0.196175	-0.272255	-0.51146	-0.59945	-0.611651	-0.253837	-0.399927	-0.47853	0.0531213	-0.499991	-0.0437277
CAND1	black	-0.246515	0.719428	0.346458	0.0177137	-0.0457505	-0.425237	-0.618015	-0.549114	-0.248979	0.167862	-0.380559	-0.337342	-0.0691486	-0.385301	0.203587
CPSF6	black	-0.200874	0.802185	0.176404	0.107532	-0.0649966	-0.467275	-0.524732	-0.502426	-0.40315	-0.155659	-0.180273	-0.297163	0.207593	-0.303408	0.346437
KRR1	black	-0.205453	0.762841	0.0480318	0.0598124	-0.211182	-0.57039	-0.560918	-0.517874	-0.219608	0.0259769	-0.136182	-0.136627	0.135447	-0.119029	0.446961
GOLT1B	black	-0.382011	0.758991	0.483362	-0.213851	-0.255345	-0.259155	-0.514678	-0.596597	-0.637171	-0.321797	-0.395082	-0.381138	0.121472	-0.446609	-0.0490215
SERINC1	black	-0.242758	0.844625	0.379196	-0.461639	-0.543995	-0.53584	-0.558833	-0.796587	-0.482565	-0.0750222	-0.235452	-0.121462	0.153119	-0.485193	0.127018
KIAA1244	black	-0.227914	0.720805	0.388835	-0.0980472	-0.122411	-0.385206	-0.435054	-0.562047	-0.611906	-0.282899	-0.366503	-0.155495	0.418609	-0.468176	0.149812
SENP6	black	-0.0533899	0.637067	-0.236682	-0.266093	-0.640271	-0.697704	-0.372254	-0.54417	-0.162479	-0.149929	0.237323	0.152052	0.324147	0.0405015	0.484766
FAM172A	black	-0.145313	0.718458	0.0616255	-0.25178	-0.464145	-0.580399	-0.504044	-0.592575	-0.197334	0.0576216	0.0132127	-0.0124052	0.0551063	-0.201015	0.369773
KPNA1	black	-0.19502	0.691731	0.0100023	0.0332153	-0.23621	-0.550686	-0.597807	-0.501318	-0.0704905	0.209012	-0.169355	-0.215862	0.0220733	-0.0572699	0.432326
UBE3A	black	-0.232775	0.806422	0.367593	-0.0541107	-0.172092	-0.455712	-0.635807	-0.656109	-0.408554	0.0255694	-0.289861	-0.383913	-0.0497016	-0.449836	0.191592
SLC25A36	black	-0.0679479	0.772043	0.000668905	-0.319643	-0.626791	-0.7409	-0.609372	-0.744401	-0.243127	-0.0449357	0.177548	-0.0564698	0.174392	-0.249206	0.382804
TTL	black	-0.243046	0.684447	0.445143	-0.265585	-0.266249	-0.309932	-0.350612	-0.619078	-0.686621	-0.311588	-0.325971	-0.114869	0.129071	-0.483407	-0.0185441
STRN	black	-0.294226	0.777668	0.45641	-0.323019	-0.340872	-0.358219	-0.529334	-0.676385	-0.780439	-0.474304	-0.169784	-0.154882	0.343921	-0.555041	0.0154488
DCAF17	black	-0.156003	0.752341	0.0471597	0.19743	-0.0100061	-0.518134	-0.515407	-0.426761	-0.339506	-0.152549	-0.113038	-0.0875404	0.325465	-0.178887	0.463645
ORC4	black	-0.132929	0.69566	0.447713	-0.108037	-0.149703	-0.374791	-0.597371	-0.627445	-0.436475	-0.034914	-0.235314	-0.364873	-0.015728	-0.529583	0.0282887
SRSF11	black	-0.154144	0.811769	0.24083	-0.296955	-0.399063	-0.471565	-0.461064	-0.642683	-0.612536	-0.411816	-0.137144	-0.115614	0.315186	-0.386581	0.167316
AKT3	black	-0.230441	0.695538	0.321534	-0.163869	-0.227396	-0.408011	-0.49387	-0.590392	-0.315658	0.0513056	-0.118374	-0.1421	-0.083582	-0.44419	0.173029
SLC35A3	black	-0.0187506	0.600063	-0.274481	-0.403314	-0.725673	-0.700313	-0.312938	-0.522181	-0.056176	-0.065531	0.309958	0.259518	0.296612	0.040413	0.513102
RCOR3	black	-0.101481	0.781032	0.145631	-0.337506	-0.520834	-0.575338	-0.518244	-0.693137	-0.346924	-0.0933061	0.0193668	-0.0901035	0.15971	-0.370194	0.275693
CAMSAP2	black	-0.247185	0.779335	0.528934	-0.0655328	-0.0847883	-0.354407	-0.638663	-0.641928	-0.474344	0.0081935	-0.495147	-0.408543	-0.0990654	-0.51961	0.0850742
ANKRD13C	black	-0.300384	0.736484	0.360551	-0.537061	-0.592228	-0.45249	-0.555998	-0.736364	-0.426571	-0.116049	-0.200828	-0.231375	0.096296	-0.450531	0.0394237
RAB3GAP2	black	-0.152622	0.773011	0.138867	0.0909825	-0.133094	-0.56879	-0.668672	-0.548036	-0.188459	0.160895	-0.264817	-0.200673	0.0795222	-0.183934	0.428387
RAB14	black	-0.251878	0.794933	0.0314331	0.00702372	-0.264419	-0.631584	-0.570906	-0.548994	-0.302537	-0.133317	-0.125516	-0.119048	0.371082	-0.12033	0.437478
FBXW2	black	-0.183177	0.776822	0.159436	-0.311894	-0.520523	-0.566498	-0.523021	-0.705431	-0.316776	-0.00119002	-0.110064	-0.160278	-0.0112401	-0.268298	0.24854
WDR11	black	-0.0807691	0.697547	0.0030139	-0.250176	-0.457797	-0.559894	-0.490475	-0.570607	-0.322107	-0.152241	0.116942	0.0389366	0.275841	-0.20898	0.331046
PANK3	black	-0.288594	0.896124	0.280475	-0.171466	-0.34308	-0.598516	-0.692177	-0.733683	-0.413749	-0.0152747	-0.235457	-0.209057	0.0557625	-0.37875	0.311218
UFM1	black	-0.0738405	0.722915	-0.177897	-0.194695	-0.539112	-0.7177	-0.466849	-0.567373	-0.255539	-0.19275	0.141629	0.115606	0.289896	0.0174945	0.511399
WBP4	black	-0.129647	0.727766	0.346876	-0.453431	-0.506313	-0.452992	-0.422987	-0.7062	-0.43785	-0.10985	-0.222958	-0.178325	0.133228	-0.468182	0.0594599
ZMYM2	black	-0.203379	0.82749	0.179175	-0.255307	-0.490795	-0.647174	-0.624087	-0.738513	-0.26753	0.0384958	-0.172488	-0.237142	0.0908704	-0.304936	0.31255
UBL3	black	-0.255587	0.763984	0.460759	-0.330741	-0.363998	-0.40863	-0.593186	-0.729487	-0.553805	-0.152434	-0.0296905	-0.22508	0.0965236	-0.627172	0.0369058
FYTTD1	black	-0.255449	0.728422	-0.0597064	0.271596	-0.0585022	-0.539862	-0.528275	-0.396991	-0.227037	-0.0771563	-0.0571341	-0.139745	0.168843	0.0169353	0.522094
CBX3	black	-0.262081	0.745508	0.186815	-0.0804503	-0.270244	-0.424391	-0.39003	-0.529411	-0.521936	-0.349115	-0.136848	-0.208019	0.201362	-0.240943	0.203173
CCDC91	black	-0.253707	0.732529	0.425598	-0.35421	-0.41043	-0.398535	-0.556054	-0.724987	-0.546036	-0.177583	-0.0786669	-0.156487	-0.0215234	-0.566314	-0.0104373
TTC21B	black	-0.106981	0.736193	0.107549	-0.282779	-0.418169	-0.555508	-0.491198	-0.598516	-0.342712	-0.165364	0.107875	-0.0766287	0.171655	-0.30105	0.311087
ARFGEF2	black	-0.264711	0.842811	0.162557	-0.247357	-0.41935	-0.582555	-0.619145	-0.66661	-0.345497	-0.0679402	-0.142366	-0.0975772	0.14781	-0.270456	0.32256
RAP2A	black	-0.200304	0.80929	0.383616	-0.268046	-0.316329	-0.486483	-0.517055	-0.696186	-0.461404	-0.0589897	-0.309272	-0.165782	0.0483954	-0.484731	0.179986
UBA2	black	-0.190706	0.801783	0.151258	0.0152747	-0.193693	-0.558665	-0.538137	-0.574674	-0.365738	-0.0779607	-0.21722	-0.146754	0.0693666	-0.226592	0.368399
SGPP1	black	-0.157843	0.759735	0.135462	-0.297779	-0.44119	-0.574334	-0.534942	-0.610585	-0.273009	-0.03955	-0.18555	-0.0296179	0.235592	-0.244956	0.339661
RHOT1	black	-0.291375	0.708752	0.47164	-0.0373551	-0.0372925	-0.332923	-0.512106	-0.562474	-0.475679	-0.094328	-0.420168	-0.278537	0.104333	-0.520564	0.0756058
PEX1	black	-0.109797	0.73817	0.264347	-0.57044	-0.608182	-0.441141	-0.443882	-0.69608	-0.492693	-0.257086	-0.062119	-0.101696	0.214504	-0.438228	0.0603115
PHF20L1	black	-0.286392	0.867735	0.380389	-0.34172	-0.430009	-0.495202	-0.642375	-0.760109	-0.46948	-0.0551338	-0.288261	-0.329735	-0.00556653	-0.469249	0.143853
WDR44	black	-0.212417	0.840746	0.271832	-0.421043	-0.530313	-0.558328	-0.505509	-0.74543	-0.556221	-0.256783	-0.0792199	-0.0651697	0.297752	-0.446337	0.214722
PRKAA1	black	-0.00543342	0.700478	0.00285972	-0.587213	-0.799455	-0.684351	-0.477421	-0.74657	-0.192986	0.0191375	0.123101	0.104282	0.0495386	-0.216655	0.299391
UBE2G1	black	-0.34769	0.735688	0.303298	0.0344134	-0.0589172	-0.331119	-0.423956	-0.461774	-0.531745	-0.298714	-0.373178	-0.243884	0.29701	-0.298742	0.168448
ZRANB2	black	-0.210104	0.746577	0.366795	-0.370355	-0.427507	-0.417226	-0.533252	-0.690398	-0.513534	-0.231371	-0.0686771	-0.262414	0.0481975	-0.526554	0.01113
SERINC3	black	-0.190177	0.738993	0.197367	-0.335419	-0.462929	-0.515356	-0.403661	-0.635723	-0.442184	-0.176736	-0.139858	0.111864	0.313342	-0.307033	0.207731
COG6	black	-0.119224	0.707334	0.369668	-0.41645	-0.462029	-0.457624	-0.669721	-0.7238	-0.332139	0.0656155	-0.0829494	-0.194322	-0.0448638	-0.513202	0.0794384
KRAS	black	-0.196485	0.719075	0.3367	-0.344674	-0.447417	-0.484562	-0.711639	-0.744058	-0.232809	0.212436	-0.0761653	-0.352757	-0.274659	-0.445921	0.093808
ZFC3H1	black	-0.14476	0.741058	-0.0288454	0.0380993	-0.176588	-0.626466	-0.442403	-0.470994	-0.226688	-0.0680036	-0.194305	-0.0213905	0.317229	-0.106439	0.505382
CLOCK	black	-0.224585	0.771521	0.154714	0.00380796	-0.202749	-0.585679	-0.635547	-0.591142	-0.210094	0.129622	-0.138217	-0.140734	0.00653153	-0.248763	0.383238
ARGLU1	black	-0.180666	0.723357	0.315987	-0.00921159	-0.0709006	-0.316328	-0.435688	-0.486445	-0.517635	-0.261124	-0.24759	-0.284094	0.193079	-0.437195	0.136357
TPP2	black	-0.190664	0.78853	0.108062	-0.163652	-0.389143	-0.587187	-0.483329	-0.604863	-0.437606	-0.261757	-0.187062	-0.0390775	0.362393	-0.214981	0.361477
DMTF1	black	-0.0389212	0.709807	0.0882476	-0.287491	-0.410229	-0.555388	-0.348778	-0.593428	-0.433403	-0.260242	-0.0683478	0.0531516	0.379354	-0.323843	0.291467
ABCB10	black	-0.120018	0.654588	-0.130826	-0.00543266	-0.271427	-0.619763	-0.557242	-0.444748	0.0109532	0.123513	-0.0220915	-0.0523247	0.129444	-0.00823798	0.521321
CAB39	black	-0.352068	0.815356	0.312278	-0.0168465	-0.122101	-0.426245	-0.549204	-0.565042	-0.464394	-0.118536	-0.372412	-0.146773	0.132019	-0.338937	0.22582
REV1	black	-0.314188	0.776384	0.423247	-0.206447	-0.248102	-0.340086	-0.566898	-0.640014	-0.531657	-0.177594	-0.320545	-0.319012	0.0609885	-0.497434	0.0271761
VPS36	black	-0.164279	0.773948	0.330507	-0.400234	-0.451782	-0.512701	-0.55577	-0.742889	-0.401164	-0.0443911	-0.156745	-0.135596	-0.111922	-0.507992	0.118682
IREB2	black	-0.170147	0.760865	0.164412	-0.245325	-0.44963	-0.628063	-0.681701	-0.713282	-0.0863089	0.28534	-0.176467	-0.255407	-0.227315	-0.262212	0.292982
YME1L1	black	-0.330452	0.652543	-0.10256	-0.00873214	-0.353672	-0.55322	-0.494671	-0.446157	-0.0447003	0.0855588	-0.0823738	-0.173871	0.0932875	0.103719	0.443099
FAM8A1	black	-0.17744	0.729297	0.188275	-0.292461	-0.425942	-0.570578	-0.569298	-0.662661	-0.301408	-0.0455183	0.0473039	-0.0942478	0.208992	-0.396085	0.261055
CREBZF	black	-0.115424	0.736261	-0.0700614	-0.188939	-0.44326	-0.592155	-0.462573	-0.529679	-0.247585	-0.146027	-0.002422	0.00365049	0.318413	-0.0713213	0.439287
FBXO11	black	-0.22328	0.740655	0.189028	0.0446953	-0.12331	-0.470698	-0.552545	-0.530944	-0.234677	0.13359	-0.212537	-0.173599	0.0227519	-0.257414	0.340587
CARF	black	0.126811	0.653206	-0.152454	-0.420074	-0.664367	-0.731633	-0.389154	-0.624227	-0.157425	-0.0497935	0.355098	0.248441	0.395542	-0.186362	0.484392
HECW2	black	-0.29451	0.693073	0.51051	-0.310114	-0.246529	-0.285726	-0.378145	-0.601759	-0.708604	-0.389031	-0.372102	-0.214513	0.365782	-0.554175	-0.0326681
SLC35A5	black	-0.0791489	0.70284	-0.0344106	-0.152002	-0.322976	-0.621065	-0.440393	-0.49283	-0.240195	-0.102319	-0.0413905	0.165801	0.526005	-0.145707	0.489173
USO1	black	-0.296346	0.813566	0.0824428	-0.0695638	-0.323812	-0.585745	-0.60533	-0.580393	-0.266609	-0.0311881	-0.14449	-0.188729	0.207102	-0.143773	0.384619
KIF21A	black	-0.186298	0.731375	0.370367	-0.0520553	-0.122097	-0.455325	-0.689373	-0.627941	-0.298554	0.153566	-0.303402	-0.243873	-0.0622452	-0.449044	0.180147
NUPL1	black	-0.27515	0.739354	0.0919726	0.125771	-0.163574	-0.515269	-0.586518	-0.500886	-0.241041	-0.0310884	-0.188887	-0.420168	0.108421	-0.119487	0.382896
RBM26	black	-0.231526	0.731549	0.427425	-0.0483523	-0.0984395	-0.403881	-0.624649	-0.621977	-0.447269	-0.0392713	-0.385549	-0.407172	-0.057979	-0.493859	0.0967178
MBNL2	black	-0.293587	0.705217	0.463596	0.011151	0.0312633	-0.224864	-0.438468	-0.464635	-0.680046	-0.415019	-0.307756	-0.351713	0.300599	-0.503393	0.0643104
ABHD13	black	-0.247623	0.711085	0.0370522	0.124636	-0.112252	-0.561013	-0.613648	-0.459093	-0.133325	0.059402	-0.196914	-0.194861	0.0386461	-0.0893127	0.449605
NAA30	black	-0.32478	0.690709	0.519976	-0.0427173	-0.0192663	-0.27935	-0.616545	-0.576375	-0.376318	0.0784513	-0.411478	-0.470549	-0.236347	-0.532167	0.0128083
RPRD1A	black	-0.175555	0.825938	0.255685	0.0310249	-0.0970481	-0.527225	-0.543865	-0.591578	-0.383926	-0.0285538	-0.245302	-0.206018	0.105968	-0.375458	0.351469
GALNT1	black	-0.240752	0.770392	0.179829	-0.265697	-0.51107	-0.663025	-0.637223	-0.747151	-0.266419	0.076366	-0.096796	-0.0865171	0.00223616	-0.272806	0.298739
CEP170	black	-0.208642	0.819494	0.095997	-0.108132	-0.31108	-0.598902	-0.561938	-0.586498	-0.500019	-0.323509	-0.0735624	0.0413982	0.50351	-0.251542	0.416745
FBXO28	black	-0.315412	0.779123	0.330359	0.10431	-0.0316343	-0.424325	-0.545659	-0.532494	-0.452735	-0.104797	-0.42656	-0.315106	0.20831	-0.327758	0.258655
SCRN3	black	-0.144819	0.738239	0.13857	-0.493408	-0.650985	-0.663505	-0.486893	-0.752082	-0.280893	0.0309744	-0.0311596	0.171848	0.198726	-0.331268	0.29902
KIAA1715	black	-0.13552	0.771658	0.296404	-0.345789	-0.445253	-0.537359	-0.567552	-0.705618	-0.26473	0.115384	-0.224625	-0.195806	0.0414447	-0.411162	0.187796
ENOPH1	black	-0.223005	0.68867	0.388899	-0.292469	-0.349536	-0.289764	-0.272318	-0.56582	-0.67477	-0.41702	-0.281388	-0.112258	0.323292	-0.411981	0.000586165
2019-03-06	black	-0.153669	0.726713	0.26209	-0.0895168	-0.214027	-0.476651	-0.606423	-0.579175	-0.184648	0.133851	-0.238643	-0.35938	0.0236726	-0.356485	0.230645
PPIP5K2	black	-0.0384093	0.711565	0.184536	-0.504749	-0.644849	-0.594013	-0.5319	-0.755956	-0.309511	-0.0274107	0.0326649	-0.0884813	-0.0631841	-0.404934	0.160103
BDP1	black	-0.155303	0.837294	0.402423	-0.472924	-0.522119	-0.514552	-0.619373	-0.820933	-0.540571	-0.120603	-0.164133	-0.171128	-0.0271937	-0.55702	0.0791852
SLC30A5	black	-0.125485	0.678098	-0.0811058	-0.112855	-0.37421	-0.624828	-0.590271	-0.520266	-0.167703	-0.036248	0.111763	-0.00124652	0.19597	-0.0659959	0.409698
ATG12	black	-0.286726	0.75837	0.265277	-0.00406088	-0.125619	-0.40798	-0.443262	-0.499569	-0.521672	-0.297086	-0.318056	-0.125472	0.307907	-0.309644	0.223033
YIPF5	black	-0.234105	0.65536	-0.137287	0.105386	-0.186082	-0.580795	-0.535031	-0.393992	-0.132936	-0.0542258	0.0644672	-0.0222536	0.233341	0.0429655	0.507082
DDX46	black	0.00803516	0.73874	-0.0776969	-0.263049	-0.495819	-0.647414	-0.391262	-0.571819	-0.242057	-0.0977546	0.100616	0.168002	0.284739	-0.111335	0.464004
FBXO38	black	-0.13806	0.70114	-0.0536797	-0.0583529	-0.304216	-0.552303	-0.440409	-0.476132	-0.211605	-0.0921011	-0.142131	-0.0825359	0.290164	-0.0500513	0.429759
PURB	black	-0.280638	0.819512	0.392756	-0.068368	-0.187354	-0.470192	-0.573217	-0.674953	-0.461211	-0.0529666	-0.341502	-0.384141	-0.00263879	-0.457437	0.166961
ZNF711	black	-0.0667682	0.737346	0.240626	-0.553117	-0.69603	-0.595225	-0.493462	-0.794867	-0.364112	-0.0244963	0.0369809	0.001604	0.0936701	-0.455863	0.176121
TERF1	black	-0.250689	0.707382	0.0115752	-0.0404642	-0.305535	-0.57399	-0.466722	-0.483006	-0.201581	-0.0620019	-0.0779433	-0.0982952	0.371753	-0.117835	0.435234
NPAT	black	-0.0247861	0.650484	-0.0566765	-0.440684	-0.661163	-0.671348	-0.486307	-0.634597	-0.0443259	0.146278	0.11267	0.093264	0.0843581	-0.151141	0.40925
ANK3	black	-0.219046	0.709265	0.487764	-0.280263	-0.219953	-0.292493	-0.326741	-0.592179	-0.745217	-0.418183	-0.37125	-0.131033	0.390613	-0.557431	0.00375676
UHMK1	black	-0.0914997	0.724498	0.132481	-0.128257	-0.285637	-0.61403	-0.589979	-0.595738	-0.150581	0.146443	-0.171733	-0.167255	0.0445369	-0.256559	0.376308
USP12	black	-0.153474	0.819506	0.00730256	-0.137619	-0.378209	-0.668085	-0.474715	-0.612083	-0.332358	-0.119979	-0.0977802	0.0079396	0.230323	-0.144957	0.482014
RAD17	black	-0.219083	0.746007	0.254691	-0.191215	-0.272979	-0.450447	-0.497041	-0.581939	-0.548905	-0.333052	-0.166568	-0.0942661	0.232262	-0.366409	0.153168
TRAPPC8	black	-0.185673	0.865955	0.132696	-0.172807	-0.344593	-0.626639	-0.659713	-0.656073	-0.344606	-0.0662882	-0.0489659	-0.10632	0.197391	-0.32449	0.393902
VPS37A	black	-0.313703	0.778053	0.256977	-0.0981827	-0.274737	-0.500917	-0.528154	-0.589904	-0.39836	-0.150715	-0.345735	-0.287717	0.279813	-0.264382	0.253109
FAM122B	black	-0.235029	0.694073	0.437335	-0.315362	-0.255808	-0.274058	-0.324552	-0.58882	-0.587931	-0.245817	-0.288156	-0.194657	0.0154054	-0.535297	-0.0446966
SAMD8	black	-0.124286	0.627215	-0.223274	-0.245573	-0.595504	-0.716682	-0.429343	-0.51986	0.138626	0.289724	0.050102	0.0884947	0.117053	0.107923	0.588343
HIAT1	black	-0.211432	0.795168	-0.0390624	-0.018336	-0.292965	-0.632885	-0.489088	-0.519164	-0.327185	-0.198396	-0.0106752	-0.0321804	0.447072	-0.0808003	0.503758
RNF111	black	-0.26895	0.713273	0.35602	0.0445471	-0.00877101	-0.352268	-0.541474	-0.510721	-0.347336	0.0480209	-0.313563	-0.243143	0.0304092	-0.413698	0.199222
DYRK1A	black	-0.243795	0.705987	0.349031	0.116138	0.0238287	-0.340746	-0.5512	-0.512494	-0.375574	-0.00354901	-0.27906	-0.323049	-0.111613	-0.411783	0.160622
TAB3	black	-0.147137	0.726658	0.147632	-0.39121	-0.573363	-0.597067	-0.456864	-0.691282	-0.208702	0.0960554	-0.0420929	0.00528628	-0.0763793	-0.285508	0.262595
RAPGEF6	black	-0.170542	0.785308	0.157537	-0.225295	-0.393221	-0.544105	-0.486763	-0.60833	-0.548258	-0.367057	-0.0819703	0.00324967	0.453797	-0.306109	0.312776
MYSM1	black	-0.238251	0.825703	0.158791	-0.198528	-0.420399	-0.517721	-0.566407	-0.633721	-0.389066	-0.14701	-0.10155	-0.195142	0.0885921	-0.266506	0.276897
WDR26	black	-0.145392	0.781606	-0.0231632	0.0289035	-0.280277	-0.687903	-0.626244	-0.572938	-0.0156018	0.262163	-0.165374	-0.157639	0.0355078	-0.0929939	0.555207
ARL5A	black	-0.190505	0.769876	0.177857	-0.330071	-0.471396	-0.554446	-0.538443	-0.671252	-0.358176	-0.0787782	0.0887341	0.0669016	0.0799573	-0.356125	0.261564
SMARCAD1	black	-0.0310089	0.652236	-0.101157	0.0103508	-0.214264	-0.636405	-0.532636	-0.452237	-0.000667593	0.189188	-0.0532404	0.0386614	0.0757609	-0.0915725	0.542913
STT3B	black	-0.186118	0.71735	0.0341151	0.0914149	-0.185198	-0.602653	-0.526361	-0.491467	-0.154544	0.0369194	-0.312835	-0.257759	0.189999	-0.0433912	0.434423
C3orf17	black	-0.183724	0.724906	0.225874	-0.385299	-0.531448	-0.533756	-0.433372	-0.696846	-0.386891	-0.119094	-0.153052	-0.130231	0.139846	-0.346875	0.155568
GMPS	black	-0.189224	0.763796	0.310266	-0.170443	-0.301073	-0.509605	-0.608718	-0.65632	-0.266481	0.129218	-0.278538	-0.206204	-0.0233039	-0.366602	0.219359
U2SURP	black	-0.0171772	0.723334	-0.0410179	-0.26013	-0.513473	-0.659785	-0.521842	-0.622253	-0.289937	-0.149106	0.167136	-0.0156155	0.198539	-0.200934	0.373347
TOPBP1	black	-0.223498	0.755911	0.337066	-0.407977	-0.477689	-0.459043	-0.553614	-0.701468	-0.429645	-0.0870423	-0.21213	-0.127031	0.113094	-0.407855	0.124131
ABCE1	black	-0.255481	0.726356	0.0470355	-0.151768	-0.406336	-0.551836	-0.540107	-0.549238	-0.324405	-0.152165	-0.210134	-0.12238	0.304142	-0.0594858	0.350503
TMEM161B	black	-0.225248	0.784107	0.059189	-0.0977849	-0.364459	-0.628924	-0.587449	-0.610245	-0.27214	-0.0556413	-0.112098	-0.214924	0.243463	-0.178253	0.392543
GTF2A1	black	-0.139576	0.70198	0.135255	-0.435204	-0.601904	-0.569559	-0.557122	-0.676993	-0.137486	0.119222	0.0212283	-0.107412	-0.00682512	-0.303643	0.252825
EML5	black	-0.156825	0.728221	0.510455	-0.163974	-0.142717	-0.367022	-0.561587	-0.650999	-0.469506	-0.00618362	-0.379658	-0.357314	-0.0648469	-0.600316	0.0336254
SLC18A2	black	-0.173242	0.760713	0.195642	-0.0500096	-0.181322	-0.469653	-0.509013	-0.533611	-0.459074	-0.214065	-0.219441	-0.0814612	0.262221	-0.277639	0.270687
BAG5	black	-0.162767	0.827386	0.285368	-0.15298	-0.265181	-0.473088	-0.514414	-0.62771	-0.469094	-0.143637	-0.225973	-0.200951	0.180693	-0.380283	0.252212
API5	black	-0.383833	0.839561	0.40522	-0.218778	-0.271803	-0.382941	-0.476058	-0.623497	-0.645838	-0.353984	-0.379519	-0.243688	0.292741	-0.428049	0.108401
CUL5	black	-0.191453	0.814164	-0.0130544	-0.077518	-0.355419	-0.65682	-0.596576	-0.578407	-0.20293	-0.0030784	0.052396	-0.111218	0.136794	-0.147968	0.488015
TMX3	black	-0.136673	0.75354	0.210362	-0.289351	-0.455259	-0.54437	-0.623126	-0.684712	-0.284642	0.0214489	-0.0856748	-0.259237	-0.118463	-0.327868	0.171921
HDGFRP3	black	-0.255997	0.757317	0.267493	-0.100371	-0.23734	-0.45245	-0.513653	-0.600511	-0.471924	-0.158751	-0.195028	-0.141559	0.0800618	-0.340711	0.19772
PCMTD1	black	-0.0148424	0.648082	-0.116194	-0.194459	-0.434085	-0.738508	-0.503353	-0.566784	0.0449847	0.232285	0.147448	0.159287	0.130167	-0.135241	0.560283
CEP120	black	-0.0889545	0.724407	-0.121944	-0.155625	-0.422131	-0.666906	-0.383413	-0.529875	-0.337157	-0.300137	0.201192	0.206945	0.454807	-0.132192	0.492499
FEM1B	black	-0.212834	0.768306	0.132457	0.127436	-0.111065	-0.570322	-0.541102	-0.52953	-0.215901	0.0401805	-0.26693	-0.314192	0.122123	-0.20014	0.403577
NLGN1	black	-0.232824	0.746497	0.465755	-0.361136	-0.341339	-0.371937	-0.416314	-0.679751	-0.649394	-0.292987	-0.268071	-0.196227	0.26908	-0.5969	0.0298207
ALCAM	black	-0.186606	0.679053	0.467512	-0.357162	-0.297655	-0.343385	-0.459272	-0.636921	-0.665712	-0.347321	-0.350731	-0.142522	0.39279	-0.556661	-0.0408794
PWWP2A	black	-0.0344242	0.634541	-0.171168	-0.0594645	-0.305451	-0.616883	-0.371242	-0.422348	-0.316299	-0.32864	0.29585	0.178162	0.570607	-0.0876578	0.526155
PDCD6IP	black	-0.135596	0.758363	-0.0505748	-0.268187	-0.526056	-0.662529	-0.477022	-0.600754	-0.333882	-0.24704	0.0385566	0.0376	0.387392	-0.125262	0.390295
RALGAPB	black	-0.199584	0.73534	0.262889	-0.0162605	-0.130403	-0.497233	-0.647669	-0.588376	-0.219838	0.173337	-0.243896	-0.257909	-0.130515	-0.329528	0.267869
KIAA0232	black	-0.0277604	0.615315	-0.208468	-0.305365	-0.572284	-0.689845	-0.443829	-0.513516	0.0214025	0.105939	0.196233	0.193435	0.186803	0.0195414	0.545129
DNAJC24	black	-0.215716	0.758983	0.105907	-0.0244058	-0.205915	-0.525687	-0.562486	-0.521189	-0.283155	-0.00991662	-0.153419	-0.110153	0.164108	-0.190284	0.395797
BPTF	black	0.106884	0.629475	-0.162815	-0.186369	-0.427197	-0.705213	-0.395995	-0.528002	-0.109736	0.0249239	0.153183	0.24389	0.296329	-0.0939028	0.568623
PAIP1	black	-0.236214	0.713316	-0.0498311	0.150251	-0.108733	-0.479108	-0.381815	-0.341299	-0.326257	-0.262698	-0.132498	0.0460355	0.381924	0.0271706	0.469639
DMXL1	black	-0.0574292	0.81664	-0.0458825	-0.377546	-0.662445	-0.803832	-0.59311	-0.738531	-0.205432	0.0225448	0.0867078	0.099792	0.229383	-0.181837	0.501478
STOX2	black	-0.21721	0.674712	0.517918	-0.312295	-0.243278	-0.296351	-0.37355	-0.632998	-0.744332	-0.385971	-0.271087	-0.161294	0.355918	-0.633335	-0.0491748
EIF1AX	black	-0.355741	0.707356	0.387231	-0.310276	-0.354812	-0.306818	-0.466975	-0.585957	-0.535153	-0.266641	-0.289071	-0.250519	0.129914	-0.396862	0.00696807
AGFG1	black	-0.30174	0.775171	0.0322303	-0.126574	-0.404554	-0.602977	-0.546238	-0.589064	-0.343309	-0.187153	-0.087629	-0.137418	0.188132	-0.0975031	0.372611
LEMD3	black	-0.29832	0.860712	0.377747	-0.158233	-0.239251	-0.510592	-0.647009	-0.689134	-0.432914	-0.0378403	-0.358364	-0.256554	0.0260815	-0.433332	0.230284
RALGAPA1	black	-0.121652	0.761228	-0.00342708	0.0446679	-0.224262	-0.676647	-0.506244	-0.533607	-0.238547	-0.0347129	-0.0701526	-0.0690201	0.281215	-0.140082	0.534719
SRP72	black	-0.248144	0.731966	-0.0220388	-0.202439	-0.477551	-0.622815	-0.467924	-0.579703	-0.230183	-0.0324296	-0.0943888	0.0232294	0.304057	-0.0542778	0.436981
PDIK1L	black	-0.16966	0.758562	0.354294	-0.163557	-0.223004	-0.490001	-0.577906	-0.659674	-0.40605	-0.0605549	-0.221264	-0.173257	0.0354118	-0.490746	0.151961
TBL1XR1	black	-0.24595	0.741959	0.406534	-0.325547	-0.404938	-0.47679	-0.604248	-0.755402	-0.467773	-0.0651092	-0.077765	-0.223862	-0.0432769	-0.578018	0.0487144
ZNF354B	black	0.00808687	0.658096	-0.145695	-0.20612	-0.485114	-0.688161	-0.43432	-0.565335	-0.179189	-0.0762197	0.160893	0.157253	0.243246	-0.0662596	0.476226
PTPN11	black	-0.11343	0.723106	-0.111108	-0.174303	-0.450101	-0.641168	-0.378681	-0.533163	-0.181431	-0.00787647	0.0433293	0.142896	0.276416	-0.056727	0.536292
MED14	black	0.0434627	0.649331	-0.0757489	-0.469785	-0.751438	-0.714744	-0.417072	-0.688511	-0.15529	0.0109488	0.139659	0.11332	0.283769	-0.16811	0.380676
FAM73A	black	-0.233911	0.818462	0.289872	-0.338318	-0.426472	-0.521326	-0.561784	-0.701935	-0.456431	-0.0951558	-0.149533	-0.073962	0.317992	-0.437484	0.236689
RFX7	black	-0.00628942	0.660542	0.00324123	-0.0372397	-0.299956	-0.678006	-0.567693	-0.580352	0.0279808	0.359634	-0.0981727	-0.110528	0.0202315	-0.166372	0.486802
C5orf24	black	-0.285696	0.826004	0.417647	-0.178047	-0.195867	-0.418025	-0.603792	-0.638843	-0.520279	-0.180919	-0.316844	-0.307968	0.112956	-0.485494	0.158817
ADO	black	-0.298166	0.697998	0.375402	0.0877912	0.0467104	-0.276662	-0.446447	-0.444867	-0.647109	-0.386089	-0.377491	-0.226746	0.418453	-0.383467	0.117764
ERCC6L2	black	-0.172848	0.711258	0.086809	-0.163884	-0.379976	-0.553924	-0.546541	-0.587962	-0.234479	0.0474412	-0.021176	-0.0587437	0.0475305	-0.212567	0.360419
ZNF721	black	-0.175651	0.829077	0.410798	-0.166775	-0.27055	-0.481664	-0.595424	-0.715836	-0.541108	-0.173648	-0.242786	-0.339347	0.145413	-0.524068	0.127492
C16orf52	black	-0.342741	0.767372	0.530657	-0.00266101	-0.0172076	-0.300296	-0.610134	-0.588469	-0.481169	-0.0350188	-0.468452	-0.457775	-0.0749448	-0.527774	0.0462243
RNPC3	black	-0.162152	0.772005	0.431167	-0.252751	-0.277589	-0.398495	-0.586606	-0.695143	-0.421024	0.0362039	-0.203184	-0.287664	-0.0419445	-0.592057	0.0702541
ANKRD46	black	-0.218312	0.766302	0.402011	-0.252126	-0.264555	-0.388351	-0.568725	-0.632907	-0.468762	-0.153671	-0.160867	-0.247583	0.0847906	-0.518904	0.0732707
ZDHHC17	black	-0.158757	0.761835	0.251529	-0.300882	-0.413017	-0.513458	-0.592874	-0.677954	-0.419974	-0.164715	0.120923	-0.214445	0.154027	-0.483643	0.1697
ZNF33A	black	-0.00362257	0.706392	-0.075358	-0.416644	-0.626038	-0.713407	-0.378789	-0.64913	-0.309692	-0.194441	0.225127	0.305908	0.415584	-0.2091	0.424656
SPOCK3	black	-0.196287	0.671891	0.448475	-0.332795	-0.276754	-0.257673	-0.368776	-0.577003	-0.808949	-0.558751	-0.180238	-0.0435833	0.445809	-0.551823	-0.0549141
ZNF569	black	-0.182967	0.75225	0.122944	0.0190583	-0.203672	-0.63315	-0.618559	-0.595308	-0.213812	0.0504117	-0.181928	-0.160177	0.137227	-0.239997	0.401645
NF1	black	-0.00585437	0.668164	0.0282481	-0.162898	-0.392169	-0.677185	-0.549434	-0.608449	0.0699228	0.436425	-0.0436915	0.0244956	-0.0104714	-0.216937	0.488637
VKORC1L1	black	-0.301722	0.775048	0.345094	-0.102421	-0.151058	-0.419159	-0.512929	-0.569592	-0.409395	-0.0332952	-0.381525	-0.161381	0.214923	-0.389395	0.209938
DDI2	black	-0.0535399	0.735187	0.125643	-0.186372	-0.36274	-0.557386	-0.424572	-0.603297	-0.402072	-0.174412	-0.00202297	0.0173755	0.179171	-0.319909	0.292698
TRIM33	black	-0.0439854	0.741327	0.193224	-0.384958	-0.564031	-0.625197	-0.544517	-0.747075	-0.206468	0.142638	-0.106285	-0.144497	-0.0772079	-0.338131	0.283593
ZNF655	black	-0.313021	0.801489	0.346513	-0.132165	-0.196077	-0.433101	-0.487171	-0.598615	-0.479713	-0.155368	-0.421292	-0.257559	0.154772	-0.401472	0.174733
FAR1	black	-0.1322	0.683786	-0.126909	0.0612848	-0.202201	-0.56009	-0.42685	-0.373799	-0.394818	-0.426153	0.0805596	0.0437878	0.632422	-0.043955	0.504017
MAN1A2	black	-0.164965	0.843324	0.182323	-0.246434	-0.400724	-0.631349	-0.551535	-0.683619	-0.349997	-0.0486019	-0.183312	-0.0672798	0.161037	-0.320436	0.36727
TTC37	black	-0.191908	0.739216	-0.0771955	-0.103116	-0.356807	-0.706607	-0.47003	-0.537073	-0.195344	-0.0480538	-0.0622377	0.134271	0.461938	-0.0748511	0.558952
FAM169A	black	-0.16001	0.720432	0.366834	-0.251404	-0.337001	-0.476222	-0.675926	-0.683702	-0.220631	0.183635	-0.164693	-0.363086	-0.11641	-0.47745	0.145536
CNOT7	black	-0.296196	0.820407	0.371076	-0.112745	-0.206797	-0.461432	-0.563566	-0.656926	-0.444248	-0.0542094	-0.202941	-0.304645	-0.00843533	-0.469287	0.162917
SELT	black	-0.247925	0.756918	-0.0131698	-0.0729116	-0.376545	-0.641373	-0.610626	-0.562465	-0.206764	-0.0299516	0.102986	-0.0565367	0.212673	-0.101432	0.433618
RUFY2	black	-0.101246	0.752589	0.103595	-0.445227	-0.611829	-0.575587	-0.391207	-0.671742	-0.502484	-0.36819	0.0661421	-0.0209441	0.467516	-0.335327	0.236497
ANKRD28	black	-0.188278	0.777029	0.334941	-0.465488	-0.493827	-0.405571	-0.438253	-0.672968	-0.547965	-0.247902	-0.20893	-0.154723	0.174729	-0.46042	0.0804313
SACM1L	black	-0.259828	0.8516	0.049683	-0.00257618	-0.254298	-0.622753	-0.578299	-0.558456	-0.32534	-0.111126	-0.135823	-0.0576678	0.281906	-0.142841	0.496286
UBXN2B	black	-0.204684	0.723481	0.311308	-0.185623	-0.281143	-0.492416	-0.528981	-0.629104	-0.329895	0.0316517	-0.200874	-0.12425	0.0860433	-0.434831	0.219446
RP11-220I1.1	black	-0.189074	0.778733	0.26987	-0.442479	-0.549846	-0.532977	-0.561585	-0.745792	-0.370916	-0.0380014	0.0326459	-0.114168	-0.0116432	-0.462575	0.156913
GS1-251I9.4	black	-0.194571	0.799555	0.330883	-0.229729	-0.302344	-0.480014	-0.542203	-0.671389	-0.415376	-0.0486701	-0.204986	-0.162614	0.0376571	-0.462688	0.167581
RP11-690D19.3	black	0.00118911	0.710943	0.351775	-0.529257	-0.558086	-0.450834	-0.395279	-0.736301	-0.437379	-0.0891311	-0.140445	-0.122555	0.000364268	-0.515738	0.0307262
TSPAN6	blue	0.334915	-0.158349	-0.723127	0.00270466	-0.333593	-0.368501	0.0875206	0.127768	0.578182	0.226333	0.773569	0.415263	0.170132	0.512721	0.508505
ZMYND10	blue	0.338316	-0.197714	-0.389549	-0.137786	-0.230636	-0.0668323	0.142837	0.111738	0.0551147	-0.246052	0.933323	0.345027	0.211905	0.131764	0.123816
ALDH3B1	blue	0.299046	-0.355314	-0.653348	-0.036802	-0.248648	-0.163513	0.258998	0.273794	0.446536	0.0184891	0.687012	0.567621	0.264379	0.505309	0.308377
DNAH9	blue	0.324523	-0.154006	-0.402298	-0.171073	-0.328531	-0.168777	0.0682257	0.0251224	0.170728	-0.0694223	0.949574	0.336933	0.118957	0.13712	0.174048
DLEC1	blue	0.361444	-0.302694	-0.574991	-0.061318	-0.227888	-0.127059	0.172736	0.213223	0.345262	-0.0160967	0.927993	0.465227	0.199848	0.346526	0.268991
LRRC23	blue	0.355659	-0.386353	-0.586669	-0.0600271	-0.186713	-0.036113	0.334329	0.304415	0.307879	-0.132935	0.905958	0.465935	0.196585	0.363608	0.191029
MKS1	blue	0.303869	-0.418337	-0.490996	0.0726211	0.0340531	0.0202919	0.221692	0.329021	0.387206	0.0370383	0.69716	0.275225	0.0407254	0.295576	0.128014
NR1H4	blue	0.319745	-0.106902	-0.347145	-0.150232	-0.288218	-0.213384	-0.0351218	-0.0273821	0.143467	-0.0482575	0.837466	0.312064	0.0945187	0.105087	0.17394
MRE11A	blue	0.221884	0.0860678	-0.619911	-0.0318444	-0.353442	-0.493555	-0.067742	-0.0465323	0.308953	0.0620699	0.739126	0.44806	0.279984	0.346533	0.577731
MIPEP	blue	0.097529	-0.00730958	-0.333779	-0.244099	-0.432323	-0.281989	-0.0414561	-0.116503	0.13059	-0.0452315	0.696898	0.306285	0.117395	0.129827	0.185844
MUSK	blue	0.219409	-0.0753326	-0.44986	-0.0912223	-0.270512	-0.207008	0.0321705	0.0462592	0.0842517	-0.218707	0.861526	0.38189	0.370988	0.198651	0.27755
EFCAB1	blue	0.285251	-0.0739054	-0.363837	-0.0877982	-0.229855	-0.149887	0.071102	0.0501631	0.0483627	-0.205976	0.842068	0.343616	0.220386	0.137853	0.197905
DNAH5	blue	0.338258	-0.214315	-0.608458	-0.020225	-0.257332	-0.228418	0.0774401	0.155251	0.380214	0.0479845	0.935246	0.436696	0.154119	0.388629	0.361105
BARX2	blue	0.174957	-0.107694	-0.443488	0.0645806	-0.11584	-0.0994454	0.0999787	0.163644	0.0495299	-0.27949	0.83484	0.316935	0.310799	0.275107	0.263229
DSG2	blue	0.0849073	-0.00366393	-0.413928	-0.0171145	-0.265451	-0.283714	-0.0452132	-0.0278188	0.105666	-0.128677	0.744458	0.202589	0.183861	0.234872	0.295206
CC2D2A	blue	0.319341	-0.251033	-0.595272	-0.105873	-0.334641	-0.286036	0.100098	0.10239	0.612919	0.374291	0.766759	0.495484	0.004315	0.354239	0.371675
ELN	blue	0.256812	-0.267291	-0.441639	0.103359	0.00541727	-0.0249899	0.161751	0.247108	0.173348	-0.114537	0.740892	0.390826	0.138824	0.282367	0.19499
ALX4	blue	0.213416	-0.131071	-0.53008	-0.0172244	-0.248023	-0.224073	0.0427703	0.0926232	0.210359	-0.0980265	0.90626	0.426837	0.18001	0.324987	0.328563
ENTPD2	blue	0.384368	-0.491595	-0.47988	-0.158814	-0.204277	0.0484544	0.286145	0.292377	0.522809	0.199225	0.680734	0.342861	-0.0734999	0.327344	0.0470152
CROCC	blue	0.299037	-0.406577	-0.365258	-0.0510271	-0.0358781	0.160523	0.246968	0.31018	0.117675	-0.222571	0.804461	0.340787	0.161251	0.17207	-0.0267936
SLC6A16	blue	0.397873	-0.338323	-0.562073	-0.0339437	-0.217688	-0.139807	0.154751	0.194321	0.392281	0.0463846	0.896519	0.433374	0.0556883	0.325399	0.222275
CASP8	blue	0.178483	-0.0314613	-0.639577	-0.0352649	-0.331794	-0.394918	0.0260539	0.0463491	0.363109	0.0684511	0.72834	0.541148	0.181703	0.410272	0.497428
DLX3	blue	0.267357	-0.157659	-0.401149	-0.114137	-0.276846	-0.178646	0.00491108	0.0287898	0.205652	-0.0312772	0.84477	0.250472	0.0455933	0.185742	0.171767
SPA17	blue	0.256426	-0.0693893	-0.30616	-0.301734	-0.419238	-0.197447	-0.0128681	-0.0797655	0.0956327	-0.0967841	0.870594	0.315909	0.117194	0.0205176	0.113894
ZMYND12	blue	0.358177	-0.342667	-0.645539	-0.0177311	-0.254453	-0.176443	0.187213	0.240017	0.551748	0.174716	0.849089	0.431088	0.116894	0.451778	0.304826
EVI5	blue	0.124112	0.259459	-0.661173	-0.00622542	-0.426362	-0.666994	-0.169062	-0.160989	0.245888	0.0044769	0.711492	0.447052	0.491674	0.385394	0.737573
SDK2	blue	0.268299	-0.342544	-0.527598	0.23419	0.0146768	-0.0866842	0.0815752	0.264855	0.393916	0.105972	0.750232	0.281117	0.0432162	0.393948	0.255062
PTPN3	blue	0.280039	-0.0113937	-0.410762	-0.0286232	-0.245786	-0.251715	-0.0436039	-0.0176588	0.0505163	-0.172777	0.856966	0.27797	0.202408	0.175507	0.285294
ST6GALNAC2	blue	0.238275	-0.30087	-0.471515	-0.058583	-0.230905	-0.0958159	0.0859682	0.155812	0.277442	-0.0756528	0.866528	0.311981	0.157413	0.287232	0.142618
TP63	blue	0.276779	-0.0178977	-0.440453	-0.0681992	-0.279324	-0.322232	-0.0392877	-0.0446814	0.153942	-0.0591593	0.711618	0.31077	0.0856389	0.212352	0.318607
ABCB11	blue	0.278225	-0.0622986	-0.349747	-0.216064	-0.351422	-0.192024	0.0303117	-0.0419233	0.135207	-0.0386578	0.776071	0.332567	0.134378	0.0841022	0.186036
CELSR1	blue	0.259543	-0.304511	-0.587457	0.315532	0.100166	-0.0613101	0.145872	0.351228	0.334017	-0.0529254	0.841817	0.273119	0.163303	0.429103	0.323343
SPAG6	blue	0.325795	-0.0575119	-0.492073	-0.0829964	-0.309028	-0.29262	0.0248759	0.0126218	0.148464	-0.112286	0.889711	0.41354	0.299864	0.258287	0.355222
TP73	blue	0.332338	-0.265884	-0.527641	-0.0665971	-0.233361	-0.114576	0.181386	0.187245	0.251827	-0.111101	0.952579	0.419652	0.221928	0.297441	0.241345
RABL2B	blue	0.152116	-0.102579	-0.113857	-0.166424	-0.124064	0.0581165	0.0096583	0.0198116	-0.0904835	-0.246983	0.758409	0.0539087	-0.0323209	-0.139569	-0.100227
RFX3	blue	0.228286	0.131607	-0.522686	-0.0562055	-0.378268	-0.459505	-0.190765	-0.118837	0.330635	0.135606	0.784155	0.172691	0.0540087	0.240107	0.467248
PIH1D3	blue	0.288042	-0.162665	-0.495848	-0.069817	-0.256326	-0.200157	0.0548884	0.0898296	0.204228	-0.107843	0.967071	0.382323	0.241361	0.240984	0.276654
TCF7	blue	0.251356	-0.324448	-0.707338	0.220628	-0.0432081	-0.156752	0.140198	0.330349	0.508288	0.116193	0.840071	0.412381	0.163344	0.531446	0.4232
IMPG2	blue	0.186535	-0.147788	-0.471054	0.0783464	-0.127533	-0.18457	0.0892754	0.151294	0.326658	0.0865478	0.68664	0.363125	0.0820412	0.279476	0.316305
PGR	blue	0.155417	0.155602	-0.589634	0.00848555	-0.361414	-0.547234	-0.132805	-0.120153	0.299223	0.0791258	0.706795	0.395957	0.176911	0.358655	0.584783
RFX2	blue	0.288996	-0.497334	-0.654898	0.275825	0.0872713	0.00239249	0.213718	0.454819	0.654885	0.265943	0.771339	0.309412	-0.0402079	0.519923	0.286068
KIF9	blue	0.233042	-0.228758	-0.36328	-0.061128	-0.166759	0.0040773	0.176695	0.15625	0.0775458	-0.211514	0.851467	0.276193	0.0605388	0.174373	0.0597374
KIF4A	blue	0.322228	-0.110528	-0.445705	-0.257423	-0.420545	-0.247757	0.0629538	-0.0148102	0.246902	0.0264414	0.855864	0.430859	0.0367536	0.162295	0.216687
IL5RA	blue	0.294834	-0.15176	-0.529388	-0.0187378	-0.225486	-0.237253	0.0521506	0.103112	0.262274	-0.0584236	0.948342	0.393712	0.222204	0.283952	0.335938
ABCC6	blue	0.320595	-0.401061	-0.474434	-0.026313	-0.132908	-0.0766195	0.0882814	0.208562	0.480694	0.208941	0.677159	0.363545	0.000203355	0.294306	0.153701
TEKT2	blue	0.390262	-0.233815	-0.468197	-0.177642	-0.306933	-0.128541	0.140249	0.102822	0.177397	-0.132335	0.955945	0.418832	0.207859	0.198694	0.177897
EFHC1	blue	0.264274	0.0410272	-0.409251	-0.225706	-0.416609	-0.34305	-0.0416457	-0.117031	0.107333	-0.113409	0.899515	0.360847	0.231325	0.0838802	0.283482
IFT74	blue	0.341279	-0.0590434	-0.564167	-0.139253	-0.413492	-0.38778	-0.00202698	-0.0323472	0.304295	0.000706829	0.782711	0.355078	0.251024	0.279442	0.380649
ANKRD54	blue	0.194901	-0.353903	-0.295873	-0.0484806	-0.113208	0.118089	0.190804	0.203966	0.208351	-0.052059	0.718758	0.135674	-0.149983	0.147124	-0.0821389
CBY1	blue	0.316502	-0.541936	-0.561311	0.103942	0.0127359	0.114149	0.456766	0.471117	0.430806	-0.0328803	0.711972	0.418434	0.0045189	0.448552	0.13153
RAB36	blue	0.24891	-0.357125	-0.328089	-0.323156	-0.333652	0.00986908	0.128479	0.10543	0.389214	0.209995	0.702113	0.248233	-0.257435	0.151254	-0.0206962
SAMD15	blue	0.199852	-0.0676513	-0.269422	-0.138303	-0.225908	-0.170485	-0.0304596	-0.0227022	0.222708	0.143063	0.734761	0.287386	-0.0373364	0.0225868	0.183372
PLTP	blue	0.335923	-0.476012	-0.737617	0.189573	-0.0570872	-0.100817	0.206067	0.403301	0.692483	0.296613	0.746449	0.461011	0.0505755	0.630904	0.379304
PROCR	blue	0.137819	-0.216256	-0.621128	0.0213034	-0.21976	-0.196016	0.175353	0.208638	0.223804	-0.164317	0.709268	0.582184	0.281773	0.50815	0.339736
TSNAXIP1	blue	0.292648	-0.274609	-0.220701	-0.259539	-0.21144	0.0948724	0.145464	0.104586	0.0223555	-0.212528	0.808474	0.22517	0.00542646	-0.00908872	-0.103051
CCDC113	blue	0.210201	-0.0958073	-0.435391	-0.196904	-0.402558	-0.251371	-0.0287989	-0.0309548	0.260128	0.0242333	0.894343	0.306596	0.0667417	0.17961	0.232497
IQCH	blue	0.259145	-0.120648	-0.563075	-0.152567	-0.380227	-0.273769	0.0960085	0.0679895	0.317708	-0.00221144	0.891493	0.429809	0.207468	0.303971	0.339635
CSPP1	blue	0.243427	0.0617053	-0.492216	0.0130846	-0.229098	-0.335633	-0.0419092	-0.0143419	0.0855571	-0.174249	0.838643	0.306151	0.220733	0.198321	0.392584
SPAG1	blue	0.213194	-0.069083	-0.522241	-0.133257	-0.360285	-0.25501	-0.0195688	0.0393488	0.255265	-0.0704874	0.897035	0.30744	0.13052	0.291109	0.319824
CCDC114	blue	0.34678	-0.201552	-0.490485	-0.104148	-0.285997	-0.185421	0.084684	0.0905302	0.253726	-0.0292777	0.924922	0.382938	0.162251	0.258593	0.244249
CAPS	blue	0.318083	-0.234207	-0.512012	-0.0879093	-0.244133	-0.120111	0.133373	0.156284	0.209497	-0.13765	0.955726	0.428552	0.240325	0.277101	0.224298
C7orf63	blue	0.245802	0.0270117	-0.228813	-0.31439	-0.441981	-0.246928	-0.113529	-0.187095	0.0109282	-0.130486	0.836366	0.150538	0.0168555	-0.0691128	0.0784496
DNAH11	blue	0.343321	-0.0976978	-0.590974	0.0808196	-0.175461	-0.278625	0.0496957	0.121964	0.302945	-0.00708357	0.87598	0.405504	0.222513	0.367821	0.44614
TTC26	blue	0.22926	-0.0512804	-0.50194	-0.0804142	-0.321565	-0.320294	-0.0639998	-0.00798973	0.237606	-0.0288816	0.904233	0.299028	0.140684	0.224981	0.340439
RARRES2	blue	0.234972	-0.603904	-0.708457	0.284825	0.121485	0.145602	0.43626	0.609876	0.611455	0.116158	0.695424	0.413888	0.0157495	0.658083	0.229908
ECM2	blue	0.192805	0.0850435	-0.502498	-0.0758962	-0.371339	-0.466842	-0.10232	-0.12767	0.174576	-0.018422	0.799316	0.476224	0.229851	0.253023	0.463901
AK1	blue	0.295188	-0.588275	-0.634674	0.171568	0.0529774	0.146905	0.418934	0.539756	0.504489	0.0139891	0.832652	0.421061	0.0736965	0.516104	0.153415
ALDH3A1	blue	0.254899	-0.273939	-0.55927	-0.0372557	-0.218934	-0.10193	0.188821	0.232261	0.2582	-0.147351	0.833598	0.429151	0.281239	0.403637	0.25617
LRP2BP	blue	0.194081	-0.0702719	-0.550548	0.0972963	-0.205703	-0.309727	0.0287189	0.0754631	0.341151	0.0335454	0.744448	0.211342	0.20335	0.329172	0.398292
FOLR1	blue	0.320309	-0.250852	-0.52499	-0.0542694	-0.220268	-0.142334	0.112967	0.168075	0.290852	-0.0341381	0.942773	0.406492	0.167299	0.28492	0.252683
EXPH5	blue	0.143227	0.0700771	-0.32645	-0.190271	-0.340973	-0.278944	-0.176963	-0.117193	0.143708	-0.00151573	0.74516	0.285578	0.00359047	0.08955	0.276314
POU2AF1	blue	0.169242	-0.207226	-0.496354	-0.112537	-0.288863	-0.186483	0.163427	0.121101	0.209925	-0.141981	0.697407	0.450893	0.366363	0.302237	0.240565
MDM1	blue	0.233604	0.132648	-0.51682	-0.183084	-0.464513	-0.462159	-0.106637	-0.141389	0.209477	-0.0217229	0.846646	0.432974	0.215857	0.198297	0.44597
RSPH4A	blue	0.254429	-0.00893471	-0.399245	-0.298021	-0.485971	-0.294002	-0.00395832	-0.104751	0.105273	-0.11188	0.917129	0.376187	0.21178	0.120345	0.23071
MAK	blue	0.21867	-0.118548	-0.530085	-0.0799588	-0.306501	-0.252002	0.0265782	0.0648008	0.216431	-0.0965005	0.937633	0.395861	0.22354	0.306745	0.328783
EYA4	blue	0.217082	0.032898	-0.617249	0.148623	-0.181552	-0.373021	-0.004407	0.0759792	0.184064	-0.140094	0.808331	0.392651	0.446075	0.393291	0.540735
C6orf118	blue	0.327968	-0.150125	-0.487219	-0.063508	-0.248261	-0.175475	0.0802693	0.104131	0.201607	-0.100978	0.937627	0.369136	0.188529	0.250243	0.274703
PTK7	blue	0.291187	-0.422187	-0.599588	0.155274	-0.0598897	-0.0437604	0.176192	0.32957	0.544543	0.201852	0.758677	0.300386	-0.0648985	0.484492	0.241567
LOX	blue	0.184554	0.0268782	-0.515844	0.173999	-0.117313	-0.29495	-0.0734907	0.0702487	0.201558	-0.0515983	0.742275	0.242957	0.175386	0.331679	0.444918
SLC27A6	blue	0.23396	-0.094209	-0.396215	-0.0714517	-0.190803	-0.151644	0.0138138	0.0979205	0.146946	-0.120225	0.762571	0.334361	0.19777	0.203922	0.262026
IQCG	blue	0.343751	-0.189646	-0.585905	-0.106287	-0.340171	-0.241294	0.100761	0.100647	0.305077	-0.0407247	0.980457	0.450795	0.186915	0.327834	0.309921
NEK11	blue	0.368719	-0.316701	-0.661212	0.0140927	-0.210815	-0.165845	0.175706	0.252733	0.495857	0.115062	0.914074	0.410315	0.0953756	0.430189	0.333607
DNAH1	blue	0.20957	0.0135051	-0.120832	-0.502418	-0.530981	-0.135763	-0.0214349	-0.224343	-0.172375	-0.279519	0.751122	0.225076	0.156821	-0.165691	-0.0693914
PCSK4	blue	0.317561	-0.500661	-0.466395	-0.0046393	-0.0529626	0.159634	0.295307	0.375141	0.381812	0.0129277	0.769669	0.250533	-0.064635	0.307047	0.00468927
GALNT3	blue	0.195794	0.0895026	-0.418429	-0.0237702	-0.287672	-0.344106	-0.138301	-0.0863219	0.0715155	-0.131947	0.807768	0.237234	0.223541	0.18269	0.366733
ACADL	blue	0.313259	-0.212893	-0.593242	-0.0281814	-0.277028	-0.210118	0.179218	0.156653	0.548645	0.278857	0.6914	0.272514	0.000855363	0.406473	0.357938
KCNJ13	blue	0.334958	-0.102235	-0.51539	-0.0644115	-0.253649	-0.245614	0.0808176	0.0942953	0.179982	-0.150568	0.820772	0.47376	0.386509	0.27071	0.345151
GRIN3B	blue	0.330053	-0.227793	-0.388775	-0.0704524	-0.180127	-0.0120289	0.169827	0.15593	0.126361	-0.151721	0.813309	0.196442	0.138435	0.198739	0.0893482
PARD3B	blue	0.362507	-0.173893	-0.7485	0.0544577	-0.284402	-0.399967	0.0748885	0.133046	0.60016	0.275785	0.825641	0.506856	0.186167	0.502101	0.568589
RPE65	blue	0.25076	-0.114621	-0.390222	-0.116607	-0.34648	-0.201012	0.0156176	-0.0108702	0.057525	-0.205552	0.753811	0.314001	0.197589	0.23621	0.153664
A4GNT	blue	0.115578	-0.100127	-0.364073	-0.0993932	-0.239382	-0.138577	0.0976048	0.0517936	0.121174	-0.112598	0.752852	0.333182	0.162322	0.128526	0.178695
IFT46	blue	0.219235	-0.314542	-0.15689	-0.0610577	-0.0351281	0.187065	0.187805	0.185217	-0.0544595	-0.301505	0.761549	0.177329	0.0151014	-0.0149753	-0.180079
CASC1	blue	0.261317	-0.0477716	-0.353199	-0.249652	-0.432457	-0.248082	-0.033899	-0.0958872	0.0987453	-0.118042	0.927539	0.280163	0.142086	0.0787816	0.172436
ADGB	blue	0.353848	-0.0877623	-0.449176	-0.138624	-0.335536	-0.2539	0.0204878	-0.000889628	0.190622	-0.0406588	0.905926	0.382646	0.17647	0.206054	0.285296
WDR35	blue	0.189326	0.215736	-0.555534	-0.183316	-0.529715	-0.59569	-0.223538	-0.219337	0.375987	0.230801	0.702182	0.291135	0.0970313	0.267524	0.550471
CNTRL	blue	0.266556	0.110606	-0.460741	-0.415687	-0.600409	-0.408041	0.0169018	-0.173183	0.104085	-0.129455	0.712404	0.50757	0.267291	0.137265	0.336617
CCDC176	blue	0.165284	0.0430795	-0.277081	-0.261812	-0.418761	-0.257492	-0.0806211	-0.164647	-0.00970404	-0.179665	0.829649	0.227844	0.1074	0.00815562	0.130903
ZC2HC1C	blue	0.239444	-0.256592	-0.48627	0.2828	0.119923	-0.0448331	0.0592859	0.291609	0.309857	0.0218982	0.748722	0.247512	0.0636282	0.336121	0.263572
CCDC147	blue	0.32488	-0.0326165	-0.31006	-0.319426	-0.475808	-0.229136	-0.011497	-0.132501	0.0360563	-0.162937	0.883453	0.225873	0.119529	0.0586469	0.103481
CCDC170	blue	0.343142	-0.176891	-0.531523	-0.107338	-0.322913	-0.234098	0.0760335	0.0813887	0.328528	0.0344384	0.924262	0.42293	0.165092	0.272494	0.303024
TP53AIP1	blue	0.206895	-0.203775	-0.262059	-0.26339	-0.344972	-0.0656099	0.0015226	0.0103979	0.130619	-0.0947024	0.746878	0.234178	0.033978	0.0946309	-0.00297144
EPHX2	blue	0.288394	-0.429967	-0.640682	0.01646	-0.213532	-0.148847	0.194271	0.272407	0.743624	0.434365	0.679316	0.362317	-0.014816	0.500042	0.305829
SCPEP1	blue	0.269642	-0.176203	-0.653127	-0.168542	-0.373562	-0.31542	0.159113	0.109932	0.413274	0.0617466	0.727141	0.665574	0.326233	0.425886	0.413865
DNAI1	blue	0.324153	-0.179808	-0.284276	-0.329504	-0.374159	-0.0780168	0.0657473	-0.00765292	0.0647168	-0.157251	0.904022	0.30346	0.0986222	0.0112357	0.0168812
IFT81	blue	0.17767	0.189341	-0.340966	-0.320415	-0.542449	-0.416608	-0.195886	-0.269519	0.0636983	-0.066361	0.822281	0.260288	0.116723	0.025113	0.282243
NRK	blue	0.263939	-0.0200482	-0.364396	-0.115539	-0.302118	-0.222838	-0.075312	-0.0533252	0.0737773	-0.116618	0.871573	0.28575	0.118828	0.108895	0.215815
ENKD1	blue	0.219389	-0.654151	-0.540249	0.243282	0.217357	0.331797	0.467259	0.643157	0.416672	-0.0740355	0.699725	0.272985	0.00915521	0.473079	0.0288532
ARHGAP40	blue	0.319974	-0.200482	-0.2857	-0.282324	-0.346966	-0.0538387	0.0608766	0.00665775	0.067348	-0.161571	0.837544	0.231685	0.0518403	0.0632927	-0.0264841
C20orf85	blue	0.307853	-0.187513	-0.49548	-0.13575	-0.290765	-0.14803	0.106201	0.109061	0.181795	-0.144528	0.954485	0.424665	0.201432	0.233603	0.219312
COL21A1	blue	0.247281	0.0209004	-0.316031	-0.150279	-0.287132	-0.254564	-0.026875	-0.0825701	0.0757476	-0.0719946	0.799121	0.327377	0.136274	0.0223495	0.231125
C20orf195	blue	0.282032	-0.232683	-0.545496	0.000969432	-0.183781	-0.129287	0.134268	0.202488	0.237829	-0.115016	0.825909	0.398798	0.332861	0.334671	0.292109
TGM3	blue	0.251878	-0.143883	-0.426612	-0.0105658	-0.14483	-0.150112	0.183008	0.121056	0.053029	-0.243857	0.752908	0.342838	0.290727	0.198324	0.23669
ID1	blue	0.206276	-0.336603	-0.507993	-0.0651692	-0.209233	-0.0412945	0.297993	0.242852	0.279171	-0.058659	0.652199	0.441497	0.0559779	0.379702	0.14442
TNFRSF19	blue	0.106035	0.132723	-0.445344	-0.111641	-0.382227	-0.418423	-0.117365	-0.141603	0.055389	-0.146096	0.744604	0.374124	0.182589	0.209009	0.406937
C22orf23	blue	0.232554	-0.16632	-0.58772	0.00135769	-0.208481	-0.202928	0.224461	0.192539	0.20568	-0.172755	0.818549	0.467736	0.431215	0.350157	0.354298
APOBEC3F	blue	0.224534	-0.346191	-0.671013	0.0654093	-0.163676	-0.148866	0.267162	0.317943	0.462171	0.0799661	0.685765	0.633806	0.186079	0.567946	0.360945
RIBC2	blue	0.350779	-0.220539	-0.519471	-0.0512747	-0.214351	-0.144501	0.13381	0.164092	0.258751	-0.0714597	0.936345	0.423476	0.205152	0.281452	0.26927
FOXJ1	blue	0.28703	-0.305604	-0.597642	0.295428	0.0835741	-0.0723996	0.162127	0.358466	0.358493	-0.028825	0.816627	0.384909	0.214363	0.446024	0.354504
TNNI3	blue	0.308962	-0.196076	-0.465116	-0.0387135	-0.212066	-0.163399	0.167705	0.125317	0.194459	-0.107958	0.717274	0.379647	0.244656	0.254963	0.240316
NXNL2	blue	0.327674	-0.290867	-0.434959	-0.13669	-0.243909	-0.0472427	0.245902	0.172278	0.144497	-0.204802	0.846829	0.432708	0.255029	0.209523	0.0961083
RSPH3	blue	0.149085	-0.0191501	-0.184757	-0.248725	-0.329905	-0.155283	-0.125905	-0.116594	0.115495	0.0438576	0.793182	0.189378	-0.0605779	-0.0771008	0.0641977
STK33	blue	0.369954	-0.31783	-0.700442	0.0375181	-0.242409	-0.227181	0.128039	0.224935	0.63946	0.299976	0.813172	0.410181	-0.0240132	0.504263	0.388607
CACNG6	blue	0.32398	-0.253518	-0.433219	-0.161481	-0.29494	-0.0890885	0.151102	0.114034	0.150249	-0.180749	0.900391	0.339458	0.189261	0.208045	0.127565
COL5A1	blue	0.292816	-0.248127	-0.449094	0.0256838	-0.121284	-0.0740285	0.0711454	0.172829	0.21544	-0.067198	0.840334	0.346253	0.0383442	0.271972	0.183841
TTLL9	blue	0.349308	-0.155424	-0.523909	-0.0895486	-0.286785	-0.232086	0.0820659	0.0675641	0.190864	-0.135317	0.923574	0.388772	0.234029	0.228133	0.272728
LRRC9	blue	0.328702	-0.0865822	-0.451208	-0.0959326	-0.283216	-0.254951	-0.00492521	0.0164002	0.168708	-0.0770649	0.930153	0.391791	0.202736	0.18011	0.287637
ZNF20	blue	0.297882	-0.228766	-0.722877	0.151838	-0.176686	-0.282448	0.15538	0.234008	0.515524	0.114247	0.718211	0.406468	0.151825	0.553239	0.474434
CNGA4	blue	0.368559	-0.259593	-0.507495	-0.0152602	-0.170866	-0.0989931	0.135787	0.192216	0.316419	0.0203707	0.890585	0.340483	0.165802	0.268484	0.235988
RGS22	blue	0.333652	-0.0578157	-0.500308	-0.248607	-0.528676	-0.361692	-0.00895993	-0.101384	0.258936	0.0216521	0.892573	0.379414	0.114338	0.238979	0.295746
LGR6	blue	0.217455	-0.0776824	-0.31198	-0.162778	-0.273593	-0.197575	0.0366628	-0.0200724	0.00218782	-0.242996	0.764975	0.360703	0.298323	0.089753	0.169155
STOML3	blue	0.300011	-0.137542	-0.449713	-0.121975	-0.294048	-0.21513	0.0451276	0.0460891	0.191866	-0.0669415	0.892392	0.409557	0.232653	0.228645	0.26641
NTS	blue	0.274301	-0.0131305	-0.393919	0.00123144	-0.220325	-0.241366	-0.0389342	-0.00341578	0.0199948	-0.221487	0.84629	0.27319	0.265699	0.190168	0.272505
LRRIQ1	blue	0.315226	-0.177674	-0.611022	0.047828	-0.212569	-0.251306	0.117926	0.156188	0.308663	-0.0287451	0.878907	0.455904	0.208376	0.375429	0.398816
DYDC2	blue	0.291092	-0.05807	-0.262943	-0.195114	-0.309152	-0.130373	0.063312	-0.0198143	-0.0218042	-0.245982	0.810741	0.280829	0.183772	0.0388339	0.111374
CRB1	blue	0.341789	-0.241789	-0.599795	0.00641753	-0.216993	-0.324514	0.00575859	0.116363	0.663441	0.441042	0.688423	0.411023	0.0294052	0.376138	0.422305
ANXA1	blue	0.166984	-0.144761	-0.749244	0.287626	-0.0850341	-0.254885	0.140984	0.283837	0.317931	-0.147971	0.744685	0.404728	0.391266	0.659139	0.538196
CCDC146	blue	0.257837	-0.0851984	-0.519867	-0.0702531	-0.301063	-0.294345	0.0393871	0.0300033	0.186235	-0.131801	0.934273	0.372423	0.221549	0.241236	0.335025
CD36	blue	0.249627	0.0255838	-0.430806	-0.121146	-0.356753	-0.35627	-0.0497998	-0.0930237	0.103781	-0.116781	0.872893	0.342324	0.246698	0.179513	0.332411
MDFIC	blue	0.243715	-0.183141	-0.799329	0.156148	-0.210918	-0.367496	0.073624	0.217143	0.70733	0.36271	0.705335	0.408601	0.0791065	0.640704	0.630037
LCA5	blue	0.211906	0.102602	-0.680112	0.141846	-0.262202	-0.523944	-0.148035	-0.00217271	0.396188	0.111529	0.788612	0.343547	0.306103	0.438117	0.67821
TSGA10	blue	0.210828	0.0179475	-0.452172	0.0340966	-0.190094	-0.266754	0.0111067	0.0397996	0.0415537	-0.252997	0.870454	0.328984	0.339882	0.174911	0.357976
MYCBPAP	blue	0.295563	-0.309869	-0.337127	-0.138646	-0.203257	0.0291178	0.173287	0.156285	0.221812	-0.0547556	0.84261	0.219454	0.00114401	0.136216	0.000238259
WDR38	blue	0.333566	-0.166483	-0.518223	-0.0475013	-0.260766	-0.213139	0.0827241	0.0930544	0.20422	-0.0993871	0.930004	0.414313	0.221109	0.288272	0.293648
SPAG8	blue	0.367597	-0.207515	-0.462142	-0.23686	-0.366534	-0.165666	0.134795	0.0584875	0.190837	-0.105462	0.95587	0.441351	0.193544	0.184176	0.180913
C6orf52	blue	0.330232	-0.303656	-0.578625	0.109131	-0.0676254	-0.105943	0.289525	0.29699	0.309041	-0.0671232	0.722723	0.436017	0.276365	0.377356	0.288197
TTC29	blue	0.317466	-0.135596	-0.515456	-0.084241	-0.296348	-0.227374	0.0855507	0.0844709	0.201779	-0.114735	0.947693	0.429766	0.277789	0.277785	0.30406
C11orf70	blue	0.341162	-0.198827	-0.601325	-0.0481118	-0.292111	-0.254288	0.111687	0.126643	0.325091	-0.0149003	0.95305	0.483369	0.21172	0.351664	0.361232
BTG4	blue	0.147227	-0.0605107	-0.473737	-0.0593451	-0.285972	-0.220121	-0.00128119	0.0388789	0.162851	-0.116373	0.838895	0.226439	0.192279	0.263491	0.286809
ITGA11	blue	0.247357	-0.156217	-0.568532	-0.0942586	-0.255908	-0.180511	0.161565	0.149065	0.272599	-0.0673433	0.69006	0.434168	0.158255	0.377134	0.307348
MDH1B	blue	0.170162	0.084926	-0.124283	-0.502243	-0.570679	-0.242472	-0.0997859	-0.286512	-0.0417297	-0.0909723	0.756565	0.236844	-0.00490306	-0.176308	-0.00909966
MNS1	blue	0.323956	-0.209345	-0.598764	-0.00490908	-0.234896	-0.212341	0.116534	0.16946	0.301616	-0.0830593	0.951396	0.438292	0.267485	0.357216	0.342845
SHROOM3	blue	0.301245	-0.267058	-0.587951	0.210706	-0.066508	-0.195401	0.0292471	0.217692	0.538301	0.277741	0.718398	0.351716	0.00537135	0.431385	0.372851
MTTP	blue	0.28957	-0.170988	-0.507667	-0.0208457	-0.245879	-0.211429	0.0341466	0.111531	0.28386	-0.0148163	0.806818	0.350444	0.187351	0.297816	0.283507
CCDC65	blue	0.27755	-0.129172	-0.282297	-0.27124	-0.351393	-0.117484	0.0482376	-0.0318062	0.0291314	-0.167205	0.865955	0.28724	0.121544	-0.000371401	0.0530868
MORN3	blue	0.20468	-0.176537	-0.174373	-0.34208	-0.352926	-0.00356458	0.065919	-0.0260801	0.0456744	-0.0938492	0.783748	0.246174	-0.0519804	-0.0584475	-0.0902886
TTC6	blue	0.318979	-0.107984	-0.516949	-0.112034	-0.334144	-0.251483	0.039957	0.0434022	0.228735	-0.067019	0.956221	0.400252	0.204471	0.259419	0.317322
AK7	blue	0.272924	0.00389448	-0.285335	-0.322622	-0.435384	-0.20206	-0.00102961	-0.106773	-0.0321767	-0.225234	0.891121	0.302319	0.232209	0.00474032	0.119766
CCDC33	blue	0.355373	-0.146774	-0.431291	-0.1567	-0.311126	-0.207281	0.0482538	0.030935	0.188688	-0.0506278	0.905451	0.399879	0.216534	0.193639	0.241972
WDR93	blue	0.378949	-0.247989	-0.512037	-0.159683	-0.316279	-0.1593	0.150556	0.11703	0.242882	-0.0989627	0.96569	0.42986	0.165354	0.245528	0.205739
MYLK3	blue	0.280166	-0.111432	-0.466229	-0.100849	-0.290154	-0.250605	0.0457209	0.0337003	0.219331	-0.0377303	0.917374	0.402818	0.235854	0.223352	0.310728
GALNS	blue	0.204502	-0.396078	-0.42074	0.193413	0.173187	0.148866	0.204443	0.412079	0.185264	-0.195036	0.736882	0.295303	0.161841	0.284369	0.0901674
TOB1	blue	0.264138	-0.239278	-0.53046	0.0455808	-0.152828	-0.164052	0.0992703	0.187503	0.405739	0.0760713	0.794187	0.315585	0.109484	0.337814	0.317532
LRRC46	blue	0.352119	-0.195125	-0.477556	-0.0880962	-0.255906	-0.171925	0.0727495	0.0939927	0.215797	-0.0671911	0.944952	0.392352	0.183679	0.229918	0.242148
CCDC40	blue	0.355102	-0.367166	-0.507231	0.0138146	-0.115876	-0.0360381	0.184449	0.250106	0.375953	0.0314467	0.862724	0.328737	0.0110257	0.311385	0.161636
FBXO15	blue	0.27103	-0.176168	-0.292143	-0.191732	-0.263288	-0.0768737	0.086935	0.0448126	0.0646472	-0.201924	0.847884	0.303713	0.165304	0.0440891	0.0376555
FHAD1	blue	0.347921	-0.21436	-0.506238	-0.0526916	-0.243317	-0.184959	0.0743418	0.113115	0.26466	-0.0306475	0.935014	0.404918	0.176592	0.270599	0.259851
FNDC7	blue	0.268004	-0.129501	-0.392998	-0.156966	-0.327242	-0.20959	-0.0469912	-0.0150594	0.239689	0.0640164	0.798099	0.311759	0.0997835	0.133836	0.202632
LHX9	blue	0.3312	-0.112155	-0.582206	0.146687	-0.100561	-0.233014	0.0839776	0.182963	0.191088	-0.165839	0.790397	0.442212	0.40341	0.394991	0.423663
RORC	blue	0.308846	-0.229216	-0.50263	-0.0534758	-0.236183	-0.156494	0.0301302	0.119776	0.329157	0.0468366	0.919987	0.314488	0.0772669	0.26856	0.251225
WNT9A	blue	0.212309	-0.184544	-0.509848	0.0267463	-0.171729	-0.16148	0.0408252	0.154482	0.157802	-0.175632	0.838781	0.345015	0.284696	0.351505	0.282984
ANKRD53	blue	0.338362	-0.384152	-0.640892	0.0772642	-0.1243	-0.091596	0.19984	0.30827	0.375614	-0.0423676	0.890061	0.433596	0.164127	0.458446	0.277624
NPHP1	blue	0.277899	-0.0845665	-0.396222	-0.216364	-0.385039	-0.196284	0.0334103	-0.0146884	0.120128	-0.141371	0.873569	0.317852	0.093463	0.13858	0.167707
SPAG16	blue	0.100065	0.110239	-0.431257	-0.314387	-0.568701	-0.384467	0.036274	-0.15377	0.0816915	-0.159942	0.702792	0.373505	0.322204	0.19097	0.30769
ANKMY1	blue	0.154898	-0.0880219	-0.244178	-0.429716	-0.493019	-0.0850088	0.0697914	-0.0872705	-0.0353738	-0.249397	0.729385	0.266005	0.111451	0.0370598	-0.03136
COL8A1	blue	0.242188	-0.0701977	-0.636059	-0.0208686	-0.295794	-0.34126	0.0524262	0.0796013	0.262489	-0.0854299	0.856059	0.485632	0.330175	0.400998	0.466419
ROPN1L	blue	0.276908	-0.11741	-0.432609	-0.125774	-0.292435	-0.183423	0.0440275	0.0435365	0.117894	-0.145596	0.937395	0.357486	0.198988	0.191614	0.227691
IQGAP2	blue	0.29222	-0.0166636	-0.591797	0.00178591	-0.287747	-0.383443	0.0163133	0.0196444	0.184856	-0.103339	0.867878	0.485659	0.319269	0.332341	0.467794
DCDC2	blue	0.294161	-0.0229004	-0.329536	-0.238278	-0.387102	-0.215747	-0.00918025	-0.0737331	0.0324772	-0.166345	0.916468	0.355769	0.182674	0.0656663	0.166217
MLIP	blue	0.244501	0.00569549	-0.481246	0.0168547	-0.264456	-0.355753	0.00126599	-0.0385219	0.0650911	-0.194024	0.791119	0.372823	0.368911	0.232444	0.374741
TCTE1	blue	0.205523	-0.0308905	-0.167518	-0.343962	-0.382004	-0.07245	0.00743787	-0.0966297	-0.0969127	-0.255615	0.805535	0.198019	0.093626	-0.0992541	-0.0177803
ARHGAP18	blue	0.205556	0.0520088	-0.527837	-0.1596	-0.448061	-0.427285	-0.0398257	-0.0984075	0.114204	-0.149633	0.820113	0.508643	0.269259	0.282017	0.400903
SDK1	blue	0.313752	-0.184273	-0.558555	0.0176839	-0.1943	-0.192421	0.125067	0.159554	0.216995	-0.14298	0.897282	0.463767	0.30934	0.311191	0.311039
CETN2	blue	0.231122	-0.150712	-0.382624	-0.19121	-0.358112	-0.127521	0.109095	0.0323069	0.129284	-0.143278	0.903533	0.274686	0.0625562	0.133576	0.0907683
LRRC27	blue	0.216693	-0.27335	-0.11273	-0.299917	-0.257806	0.135443	0.145904	0.0596158	0.0184679	-0.141449	0.731177	0.187671	-0.137077	-0.0835144	-0.219041
CCDC81	blue	0.304456	-0.198628	-0.597009	0.121822	-0.112061	-0.178893	0.102144	0.218392	0.299898	-0.0721377	0.922487	0.374346	0.267228	0.37066	0.368534
TMEM138	blue	0.314553	-0.306487	-0.606609	0.0659789	-0.145744	-0.112398	0.181416	0.249389	0.310925	-0.107944	0.840289	0.315664	0.132703	0.419683	0.237333
DOC2A	blue	0.22989	-0.202042	-0.065633	-0.163047	-0.0887364	0.139036	0.0598808	0.0667641	-0.109351	-0.24545	0.753975	0.139264	0.00097847	-0.15448	-0.162512
TMEM218	blue	0.263523	-0.369079	-0.777534	0.205838	-0.0240789	-0.155385	0.355892	0.433189	0.597094	0.144322	0.665294	0.610665	0.300056	0.621744	0.48708
SPATA4	blue	0.282066	-0.12696	-0.39637	-0.151838	-0.308386	-0.198121	0.0154692	0.0122294	0.155596	-0.112549	0.86844	0.302449	0.164093	0.148298	0.18246
PIH1D2	blue	0.238179	-0.0528583	-0.41012	-0.226084	-0.424882	-0.28127	-0.0512806	-0.0858792	0.198729	0.00604646	0.922961	0.311508	0.0779885	0.126228	0.222617
C2orf50	blue	0.161723	-0.126593	-0.155949	-0.219452	-0.229259	0.0194581	0.052833	0.0200445	-0.0586905	-0.218636	0.757601	0.255458	0.0740513	-0.0534291	-0.0309533
ENKUR	blue	0.256845	-0.205663	-0.592998	0.00877366	-0.232832	-0.282658	0.0531509	0.124607	0.455664	0.183947	0.824283	0.463362	0.116357	0.369225	0.398519
MAT1A	blue	0.382509	-0.210112	-0.425405	-0.0833543	-0.192813	-0.115168	0.1795	0.133725	0.220003	-0.0681603	0.820099	0.29112	0.0946747	0.168398	0.177511
TEX9	blue	0.304969	-0.0504793	-0.507098	-0.137694	-0.385154	-0.301107	0.00476174	-0.014342	0.243547	-0.0053051	0.933532	0.359466	0.138687	0.225108	0.335082
CCDC175	blue	0.291101	-0.0976848	-0.387275	-0.143508	-0.302902	-0.217383	0.0936373	0.00719601	0.0603031	-0.22992	0.837781	0.300669	0.237893	0.116241	0.196483
CCL28	blue	0.239578	-0.151929	-0.623641	0.00499625	-0.292553	-0.298957	0.110235	0.112237	0.319662	-0.0566754	0.70149	0.375745	0.239762	0.417165	0.377354
CCDC74B	blue	0.32595	-0.276045	-0.483455	-0.0504243	-0.171228	-0.0700305	0.213241	0.212522	0.192801	-0.187509	0.897254	0.408127	0.21066	0.252027	0.187721
ZNF837	blue	0.247495	-0.239028	-0.300374	-0.348204	-0.365429	0.0121165	0.187687	0.068874	0.102011	-0.146487	0.71812	0.272574	0.0747036	0.0837847	-0.012096
IGSF10	blue	0.346805	-0.0706927	-0.443552	-0.182641	-0.326424	-0.301441	0.0544276	-0.030459	0.190515	-0.0315776	0.848213	0.550788	0.237645	0.141236	0.317083
SPEF2	blue	0.281378	-0.00934412	-0.224964	-0.316313	-0.421616	-0.241519	-0.0820607	-0.179538	0.0148145	-0.100121	0.853504	0.231443	0.024432	-0.0932512	0.0766935
CAPSL	blue	0.340528	-0.144324	-0.465782	-0.0551355	-0.245156	-0.197703	0.0773139	0.0823835	0.168015	-0.114738	0.920759	0.39591	0.237735	0.242245	0.272977
TCTEX1D1	blue	0.307735	-0.0759301	-0.413909	-0.153276	-0.332307	-0.217664	-0.0109012	-0.00676558	0.0881787	-0.163412	0.931129	0.379437	0.212758	0.155782	0.222146
WDR78	blue	0.337841	-0.112087	-0.546512	-0.117964	-0.342164	-0.267475	0.0760209	0.0522	0.224816	-0.0861355	0.962154	0.444121	0.233873	0.272031	0.331973
BMP3	blue	0.293146	-0.0702681	-0.53968	-0.0456946	-0.293476	-0.312694	-0.00675531	0.0218324	0.235078	-0.0506984	0.94432	0.368491	0.250377	0.268064	0.378078
IFLTD1	blue	0.327148	-0.156413	-0.594804	-0.0102725	-0.230471	-0.237842	0.104217	0.152603	0.313664	-0.0406921	0.912337	0.466891	0.225629	0.35433	0.381451
FAM81B	blue	0.362353	-0.107964	-0.505743	-0.110839	-0.325184	-0.256647	0.0514336	0.0431044	0.191739	-0.102507	0.910431	0.418512	0.262657	0.270037	0.319619
FAM92B	blue	0.336788	-0.158835	-0.494626	-0.0635452	-0.247507	-0.192674	0.0821325	0.100252	0.218143	-0.0670899	0.910658	0.399236	0.220636	0.270089	0.288415
KCNJ16	blue	0.395788	-0.0566578	-0.505839	-0.0800984	-0.294069	-0.367055	0.0623864	-0.0140534	0.285961	0.0712898	0.769143	0.494341	0.228971	0.196302	0.423326
FBXO36	blue	0.247293	-0.137319	-0.597281	-0.0777923	-0.363596	-0.360531	0.0434399	0.0391612	0.54186	0.307801	0.70368	0.302591	0.0813547	0.403305	0.430887
ANKFN1	blue	0.272322	-0.382716	-0.611709	0.0812789	-0.174264	-0.139651	0.06772	0.246925	0.665162	0.375882	0.757655	0.322547	-0.0997447	0.478263	0.31078
CHST9	blue	0.222321	-0.0415456	-0.538198	-0.0245333	-0.265816	-0.302782	0.0393089	0.0469645	0.212992	-0.0992331	0.839357	0.412518	0.315992	0.296576	0.399821
DNAAF1	blue	0.389088	-0.201661	-0.470686	-0.137315	-0.303837	-0.153401	0.105494	0.0892448	0.183159	-0.109453	0.955055	0.364494	0.177443	0.222656	0.200215
ANGPT1	blue	0.210309	-0.0662714	-0.587139	0.124269	-0.164274	-0.343042	0.048573	0.10144	0.239612	-0.0859789	0.709788	0.485967	0.380995	0.415174	0.488101
CEP112	blue	0.302905	-0.224279	-0.795113	0.195367	-0.145747	-0.317004	0.144434	0.261601	0.623519	0.228807	0.670161	0.49352	0.105101	0.636459	0.561769
TDH	blue	0.187305	-0.223267	-0.317082	-0.202052	-0.293683	-0.0359921	0.0920091	0.0726093	0.107036	-0.177768	0.739771	0.18518	0.131172	0.132046	0.00597023
CCDC173	blue	0.347265	-0.253738	-0.519521	-0.0585947	-0.271175	-0.175222	0.166776	0.123728	0.234452	-0.0912093	0.825296	0.390476	0.169887	0.313442	0.23577
USP43	blue	0.385494	-0.155756	-0.532561	-0.123302	-0.331231	-0.25935	0.0976464	0.0542919	0.266037	-0.0290205	0.938094	0.446834	0.18733	0.259381	0.318615
RSPH10B	blue	0.386256	-0.268567	-0.506551	0.0224926	-0.152598	-0.107597	0.108399	0.188253	0.284147	-0.0263908	0.872149	0.320238	0.102509	0.291909	0.213997
AK9	blue	0.114671	0.12767	-0.333666	-0.142964	-0.291172	-0.320423	-0.0637829	-0.104607	-0.0196275	-0.223232	0.717715	0.385962	0.306262	0.0526178	0.304927
LRGUK	blue	0.249536	-0.124683	-0.403598	-0.180677	-0.347294	-0.175786	0.0698294	0.0208065	0.0914351	-0.18275	0.884394	0.365248	0.196941	0.172853	0.163446
ALS2CR12	blue	0.212432	-0.235335	-0.368407	0.0318407	-0.058752	-0.0564443	0.0746257	0.163698	0.253967	0.0283989	0.745367	0.178087	-0.0257225	0.169818	0.143136
SPAG17	blue	0.351003	-0.0777589	-0.492805	-0.0961989	-0.303308	-0.262723	0.0411984	0.0342146	0.137611	-0.148544	0.938252	0.417372	0.279429	0.228877	0.323846
TTC18	blue	0.361781	-0.0882712	-0.500795	-0.151749	-0.385233	-0.293232	0.0038439	-0.00650754	0.266021	0.0158037	0.934294	0.347766	0.148728	0.219741	0.311069
C15orf26	blue	0.317064	-0.15148	-0.533597	-0.0624925	-0.286711	-0.212815	0.0824757	0.0964637	0.214616	-0.106644	0.946901	0.424972	0.218145	0.303634	0.30269
RPGR	blue	0.169001	-0.0377997	-0.687817	-0.00958319	-0.316017	-0.309138	0.087689	0.136825	0.338217	-0.0831527	0.69368	0.343156	0.23797	0.525565	0.455664
FAM122C	blue	0.262661	-0.24693	-0.497919	-0.151509	-0.353332	-0.174416	0.094747	0.082416	0.322313	0.033277	0.81997	0.302785	0.0650289	0.303765	0.185338
HKDC1	blue	0.331214	-0.256095	-0.575967	0.11858	-0.143752	-0.198125	0.0602809	0.166828	0.501997	0.263361	0.717186	0.293837	-0.0415888	0.391546	0.322
C1orf158	blue	0.350608	-0.161743	-0.468462	-0.106154	-0.279583	-0.205046	0.0895024	0.0694378	0.185694	-0.0835934	0.917214	0.43255	0.244265	0.231755	0.270707
HYDIN	blue	0.303178	-0.0363208	-0.371247	-0.24215	-0.389365	-0.230881	-0.0088411	-0.0630345	0.0990697	-0.0956003	0.917978	0.327107	0.139737	0.0674041	0.207846
ZNF19	blue	0.275648	-0.134738	-0.578525	-0.063363	-0.295645	-0.272473	0.117414	0.0911188	0.302031	-0.013164	0.900391	0.46185	0.195799	0.303302	0.362584
LCA5L	blue	0.265004	-0.0801401	-0.46355	-0.0727892	-0.293921	-0.229499	-0.00467466	0.0324518	0.201376	-0.0929457	0.852543	0.277882	0.165198	0.230922	0.252131
C9orf43	blue	0.277541	-0.114726	-0.522337	0.0445932	-0.183632	-0.195385	0.135267	0.151876	0.167154	-0.157679	0.737051	0.364241	0.245356	0.312057	0.325052
SVOPL	blue	0.229391	-0.0427608	-0.197597	-0.264465	-0.349502	-0.120608	-0.0130536	-0.0822853	-0.0772112	-0.261961	0.803063	0.265808	0.139122	-0.0447644	0.00471541
DRC1	blue	0.358021	-0.199167	-0.516126	-0.0587343	-0.237463	-0.172695	0.105416	0.133101	0.22104	-0.107515	0.942622	0.404646	0.23172	0.267504	0.265352
WDR66	blue	0.362028	-0.191373	-0.261528	-0.24182	-0.292471	-0.0480424	0.104242	0.0193473	0.053048	-0.144361	0.864867	0.244586	0.0167967	-0.0180326	-0.00325808
DZIP1L	blue	0.376987	-0.234376	-0.595797	-0.103509	-0.315375	-0.179795	0.157189	0.157486	0.337926	-0.0106575	0.900778	0.486943	0.118365	0.373573	0.296174
RIBC1	blue	0.350389	-0.33478	-0.631895	0.00762033	-0.189037	-0.118917	0.209654	0.267892	0.345299	-0.0669366	0.951143	0.47309	0.231444	0.412787	0.289477
C2orf62	blue	0.363961	-0.275454	-0.54767	-0.15432	-0.323669	-0.158901	0.146277	0.131049	0.2937	-0.0375363	0.947208	0.458025	0.131774	0.296992	0.214715
DNAH3	blue	0.38699	-0.117302	-0.412348	-0.139487	-0.311606	-0.233484	0.0184569	-0.00121989	0.191128	-0.0115439	0.909242	0.370398	0.155298	0.16155	0.248626
VWA5B1	blue	0.402234	-0.168764	-0.475365	-0.0972527	-0.286445	-0.212087	0.0609557	0.0652326	0.254096	0.00307357	0.922964	0.396557	0.17077	0.226366	0.272905
CLIC6	blue	0.314544	-0.0567826	-0.532388	-0.0524422	-0.294383	-0.309674	0.0251934	0.030913	0.197845	-0.0867471	0.884605	0.376264	0.273898	0.304438	0.388861
C2orf81	blue	0.303508	-0.329016	-0.319318	-0.227189	-0.241271	0.0636951	0.22	0.158909	0.0906115	-0.211922	0.864846	0.327417	0.0772613	0.0781759	-0.0515365
CCDC17	blue	0.323896	-0.204476	-0.466133	-0.13945	-0.303667	-0.148092	0.112368	0.0917196	0.211538	-0.086299	0.922276	0.338238	0.17782	0.223742	0.191634
CCDC135	blue	0.361994	-0.276879	-0.478639	-0.0645135	-0.193475	-0.0784207	0.147137	0.180075	0.242184	-0.0686559	0.947551	0.39598	0.151744	0.225238	0.180765
TPPP3	blue	0.255357	-0.274061	-0.554332	0.0125075	-0.187787	-0.106953	0.274744	0.238795	0.151689	-0.283315	0.877439	0.500909	0.439104	0.36675	0.242384
ZDHHC1	blue	0.289323	-0.478984	-0.437361	-0.177522	-0.200338	0.16133	0.302513	0.327538	0.393928	0.0345412	0.75803	0.263514	-0.101157	0.308339	-0.0258488
TMEM234	blue	0.21989	-0.37636	-0.286533	-0.0626462	-0.055377	0.177172	0.187102	0.239604	0.10786	-0.161279	0.750569	0.152119	-0.0727064	0.118283	-0.108772
RSPH1	blue	0.260799	-0.199637	-0.226115	-0.291966	-0.331039	0.00147055	0.157005	0.0215234	0.0099884	-0.191271	0.844181	0.265135	0.0481875	-0.00556552	-0.0525364
C21orf58	blue	0.312601	-0.277556	-0.231222	-0.311392	-0.27398	0.0454752	0.142839	0.0813971	0.0709284	-0.174539	0.82539	0.276811	0.0813544	-0.0160669	-0.0907135
C9orf116	blue	0.158558	-0.291688	-0.22564	-0.138949	-0.152056	0.113079	0.165409	0.148956	0.00647458	-0.250231	0.803326	0.278607	0.0265091	0.0364931	-0.115542
C9orf117	blue	0.352397	-0.135871	-0.448838	-0.0908428	-0.266894	-0.200072	0.0451543	0.0530189	0.187363	-0.0561193	0.899344	0.349223	0.171746	0.220188	0.263985
LRRC71	blue	0.363343	-0.198238	-0.496366	-0.090749	-0.270732	-0.177703	0.122195	0.10932	0.217272	-0.0862225	0.931553	0.419281	0.221432	0.260826	0.260863
FBXL13	blue	0.294702	0.0156754	-0.461487	-0.0124544	-0.256552	-0.34625	-0.0383496	-0.0341478	0.173496	-0.0546052	0.774515	0.275165	0.162364	0.183061	0.343945
TUBA3FP	blue	0.30051	-0.30102	-0.355649	0.0665166	-0.00528223	0.0155754	0.209326	0.231874	0.190577	-0.0528572	0.757641	0.289418	0.0881942	0.152571	0.102439
WDR90	blue	0.220923	-0.15836	-0.444611	-0.161129	-0.297085	-0.0960857	0.0951324	0.0853122	0.101908	-0.20798	0.825378	0.286198	0.189215	0.219159	0.154279
SSTR5	blue	0.131341	-0.195068	-0.373617	0.00411002	-0.141057	-0.0890179	0.0887128	0.133789	0.239886	-0.0115505	0.721566	0.213069	0.0214899	0.23493	0.156859
CYB561A3	blue	0.275388	-0.132459	-0.499684	-0.0254547	-0.149282	-0.184663	0.132435	0.145229	0.191469	-0.113515	0.795653	0.553124	0.293177	0.230687	0.316995
PPP1R32	blue	0.288141	-0.248016	-0.338659	-0.226794	-0.297272	-0.0314908	0.115485	0.0876009	0.120694	-0.173545	0.928173	0.27618	0.122371	0.10985	0.0219272
UBXN10	blue	0.302486	-0.274801	-0.651109	-0.057086	-0.275614	-0.221199	0.136214	0.207807	0.537335	0.173556	0.818635	0.520672	0.137418	0.445788	0.383594
TTLL10	blue	0.304412	-0.115285	-0.46998	-0.136865	-0.314617	-0.228169	0.0848387	0.0371175	0.178561	-0.0881477	0.878008	0.389733	0.186084	0.204902	0.283037
C1orf87	blue	0.237721	-0.366626	-0.589783	-0.0791161	-0.265118	-0.0896596	0.253448	0.268844	0.455434	0.0439046	0.694594	0.415463	0.174759	0.492485	0.222303
WDR63	blue	0.347551	-0.120698	-0.484591	-0.100819	-0.308324	-0.24849	0.0055486	0.0347587	0.210779	-0.056732	0.933382	0.368456	0.228915	0.247904	0.298525
SLC9C2	blue	0.199876	0.024292	-0.356804	-0.248446	-0.469849	-0.290459	-0.104769	-0.129588	0.165607	0.0048426	0.718902	0.260673	0.0186087	0.126714	0.20552
AXDND1	blue	0.224124	-0.0518053	-0.391309	-0.230381	-0.45216	-0.283754	-0.0286816	-0.0995067	0.1241	-0.0811698	0.800045	0.326524	0.158014	0.142088	0.20059
SPATA17	blue	0.27311	-0.0666875	-0.378862	-0.151052	-0.307996	-0.180651	0.00552738	0.00425071	0.0856667	-0.157575	0.908997	0.276635	0.157073	0.11995	0.191202
CLHC1	blue	0.283081	0.024477	-0.569893	-0.0167624	-0.302077	-0.401863	-0.0656728	-0.0188427	0.325537	0.089323	0.787293	0.336843	0.202624	0.307255	0.473193
TEKT4	blue	0.396908	-0.325602	-0.435096	0.00840434	-0.0961079	-0.0372361	0.167904	0.214212	0.28093	-0.00413886	0.884278	0.311387	0.0919601	0.2173	0.146657
SPATA18	blue	0.330747	-0.141269	-0.595116	-0.044672	-0.295852	-0.288885	0.0579448	0.0931245	0.313883	0.00292827	0.936062	0.444618	0.226718	0.353418	0.391527
PCDP1	blue	0.270351	-0.123237	-0.332418	-0.314764	-0.427958	-0.151356	0.0500957	-0.0366977	0.123495	-0.086358	0.89489	0.312125	0.0855441	0.0638062	0.0858674
C1orf189	blue	0.253049	-0.111422	-0.412297	-0.130614	-0.283299	-0.15978	0.0696653	0.0528836	0.0815502	-0.197571	0.836688	0.361136	0.261769	0.196532	0.203792
ANTXR2	blue	0.228584	-0.167859	-0.759555	0.316736	-0.0538299	-0.350071	0.0534811	0.239006	0.623528	0.286198	0.713414	0.41367	0.118607	0.607881	0.621165
HIPK1	blue	0.206925	0.0994046	-0.666107	0.183319	-0.19623	-0.502896	-0.139125	0.018417	0.473598	0.257093	0.719092	0.358781	0.183594	0.419553	0.707094
GLB1L	blue	0.25796	-0.219472	-0.435196	-0.248206	-0.38182	-0.154182	0.0581759	0.0332351	0.243333	-0.0198115	0.918361	0.348719	0.0605358	0.18352	0.121205
EFHB	blue	0.344852	-0.0126991	-0.467756	-0.172233	-0.423622	-0.327416	-0.00678242	-0.062073	0.257066	0.04101	0.834794	0.321014	0.160015	0.202257	0.319989
SPICE1	blue	0.21761	0.0199791	-0.588244	0.026521	-0.287479	-0.436549	-0.111041	-0.00322732	0.461728	0.232402	0.73733	0.302507	0.109946	0.33955	0.533534
KIAA1407	blue	0.248974	0.044541	-0.312528	-0.453068	-0.626994	-0.302137	-0.0257572	-0.218725	0.0630851	-0.0992041	0.802597	0.28065	0.05422	0.0224363	0.114611
C3orf67	blue	0.192878	-0.0339663	-0.134133	-0.219394	-0.246599	-0.0851367	-0.0219264	-0.0784521	-0.108155	-0.212716	0.725299	0.197982	0.0463309	-0.127002	-0.00111416
DNALI1	blue	0.357916	-0.324552	-0.752221	0.13968	-0.141449	-0.199777	0.184541	0.308014	0.547801	0.120273	0.902048	0.459261	0.175265	0.550241	0.439992
CCDC37	blue	0.351346	-0.257296	-0.417763	-0.122489	-0.223902	-0.0491929	0.144552	0.147873	0.152879	-0.15405	0.934829	0.324545	0.157446	0.177715	0.116459
SGMS2	blue	0.160048	-0.134111	-0.721975	0.305419	-0.0491925	-0.274019	0.175231	0.278236	0.308844	-0.135616	0.775459	0.398164	0.422678	0.568707	0.561065
FAM160A1	blue	0.17978	-0.108576	-0.391024	0.142154	-0.0201893	-0.116056	0.0655696	0.144293	0.157795	-0.096893	0.736588	0.215108	0.147862	0.206885	0.257958
ZNF474	blue	0.282145	-0.127864	-0.607451	0.0869961	-0.188919	-0.24163	0.0791399	0.161208	0.236445	-0.139142	0.8966	0.367868	0.279185	0.402341	0.395586
KIF6	blue	0.290703	-0.118715	-0.502788	-0.109097	-0.272168	-0.218236	0.171869	0.0913557	0.1158	-0.227817	0.712594	0.561272	0.489684	0.252635	0.315022
SYTL3	blue	0.202444	-0.108649	-0.566938	-0.0984442	-0.371347	-0.272655	0.138141	0.0701539	0.251858	-0.0601819	0.741609	0.515302	0.345251	0.352291	0.35206
IQUB	blue	0.352159	-0.132058	-0.547453	-0.0811808	-0.315294	-0.288018	0.00320958	0.0438893	0.301836	0.0154606	0.925319	0.37882	0.185457	0.271751	0.351106
FNDC1	blue	0.139042	-0.0556532	-0.32058	0.00132218	-0.185114	-0.125507	0.000847417	0.0435322	0.0143724	-0.215043	0.801539	0.203841	0.227073	0.166457	0.179042
C7orf57	blue	0.284433	-0.0509225	-0.452804	-0.181861	-0.373688	-0.269205	-0.0124542	-0.0186407	0.139496	-0.122064	0.933453	0.397775	0.253474	0.191045	0.293055
TNFRSF11B	blue	0.220541	-0.157383	-0.680097	0.22479	-0.0690972	-0.21696	0.083438	0.276506	0.320966	-0.104706	0.731577	0.379491	0.354187	0.594725	0.483292
TMEM67	blue	0.20644	0.0202044	-0.3304	-0.303969	-0.473791	-0.271104	-0.151072	-0.152374	0.128712	-0.0335783	0.892309	0.215163	0.0164733	0.0547976	0.169789
C9orf24	blue	0.194919	-0.451864	-0.373576	-0.0323234	-0.0772479	0.19532	0.285865	0.334252	0.25088	-0.0900896	0.839052	0.244648	-0.0200301	0.222876	-0.0492803
C8orf34	blue	0.134583	0.0359915	-0.090771	-0.247882	-0.307611	-0.107395	-0.103431	-0.142806	-0.182439	-0.278416	0.783618	0.224763	0.153521	-0.146989	-0.00382789
RASEF	blue	0.236278	-0.0149516	-0.42852	-0.0708396	-0.279126	-0.27943	-0.0375694	-0.0138237	0.141376	-0.110035	0.860027	0.279494	0.182838	0.181266	0.305184
KIF27	blue	0.258136	-0.0857939	-0.651086	0.0482994	-0.246782	-0.341625	0.0293175	0.114802	0.396618	0.063941	0.831155	0.406058	0.251793	0.413509	0.507734
CXorf22	blue	0.252099	-0.0703368	-0.494255	-0.157059	-0.389951	-0.268368	-0.0249426	0.00185758	0.220524	-0.0711178	0.925336	0.336312	0.185572	0.251303	0.293467
CLDN3	blue	0.281194	-0.143883	-0.450074	-0.0888782	-0.238258	-0.133685	0.170882	0.120451	0.11183	-0.21056	0.842994	0.405357	0.274333	0.221164	0.208813
ARMC3	blue	0.340943	-0.104742	-0.47513	-0.191848	-0.367634	-0.221388	0.0669133	0.0323802	0.168551	-0.124106	0.950984	0.408879	0.228145	0.199603	0.262858
CCDC67	blue	0.29858	-0.0851321	-0.42756	-0.111049	-0.308202	-0.233524	-0.0145534	-0.000316661	0.148503	-0.110031	0.933251	0.272731	0.124849	0.176318	0.238477
LRRC18	blue	0.34146	-0.142859	-0.506038	-0.159871	-0.346216	-0.209285	0.0380413	0.0624617	0.247233	-0.0419772	0.937098	0.4292	0.193297	0.265902	0.283624
AK8	blue	0.3316	-0.220703	-0.306025	-0.300873	-0.39111	-0.0652072	0.107237	0.0257163	0.146162	-0.0900236	0.779406	0.259813	0.117223	0.104681	0.0225566
C9orf9	blue	0.250214	-0.584435	-0.439484	0.0289092	0.04098	0.23003	0.375758	0.470423	0.427195	0.0317049	0.714572	0.336047	-0.0235704	0.307613	-0.00936331
PPP1R36	blue	0.303619	-0.0826707	-0.316922	-0.427702	-0.528912	-0.18732	0.0925629	-0.0906578	0.0376659	-0.194863	0.738763	0.34544	0.224455	0.0716315	0.0620129
E2F7	blue	0.265935	-0.0946736	-0.607681	0.129776	-0.178147	-0.29406	0.0379076	0.140058	0.354174	0.0642419	0.800808	0.357313	0.230068	0.423269	0.465866
AGBL2	blue	0.351403	-0.112633	-0.444903	-0.225052	-0.397487	-0.231524	0.0532737	-0.00843301	0.18188	-0.075288	0.945598	0.385003	0.174923	0.16691	0.229104
C16orf71	blue	0.304265	-0.224254	-0.532595	0.0337433	-0.120273	-0.118757	0.108437	0.213387	0.231885	-0.123708	0.922675	0.387976	0.248344	0.302305	0.267053
FAM227B	blue	0.234361	-0.0232763	-0.48618	-0.326052	-0.55839	-0.388069	0.00878718	-0.104635	0.370405	0.167199	0.664076	0.372763	0.249227	0.220624	0.338053
WEE1	blue	0.228103	-0.215899	-0.793259	0.2655	-0.109126	-0.311337	0.123819	0.267275	0.501244	0.0684649	0.774602	0.434416	0.272546	0.619871	0.562637
ZNF3	blue	0.218311	-0.0366657	-0.562554	0.114686	-0.150518	-0.294686	0.0692024	0.0965333	0.143208	-0.223536	0.730795	0.324474	0.311616	0.333244	0.407777
IQCD	blue	0.314954	-0.395746	-0.566762	0.0139206	-0.12489	-0.00850098	0.257871	0.31831	0.363349	-0.0313577	0.930832	0.435698	0.141515	0.361088	0.200685
WDR16	blue	0.334888	-0.0979148	-0.45872	-0.177365	-0.34491	-0.225352	0.0755115	0.0218822	0.14046	-0.126667	0.943159	0.422282	0.23569	0.193247	0.262367
AGBL1	blue	0.239201	-0.122881	-0.181458	-0.204645	-0.248725	-0.0220573	0.0411317	-0.00988811	0.0883064	-0.0154564	0.76597	0.129035	-0.0933837	-0.0465146	-0.0150294
CNPY4	blue	0.336149	-0.551161	-0.691661	0.128507	0.0157976	-0.0108004	0.383337	0.475664	0.572359	0.117	0.651484	0.536731	0.120678	0.569612	0.264775
DUSP18	blue	0.294424	-0.346787	-0.688047	0.249503	0.0394322	-0.121295	0.200151	0.388938	0.515296	0.130956	0.757928	0.464952	0.141083	0.516729	0.433724
TTC16	blue	0.343956	-0.182214	-0.432426	-0.296473	-0.471442	-0.246131	0.0732788	-0.0504377	0.259643	0.0480292	0.853588	0.38389	0.0595899	0.163403	0.166339
PROCA1	blue	0.421324	-0.500211	-0.402502	-0.0894915	-0.0858383	0.093884	0.329732	0.312484	0.329518	-0.0173264	0.703523	0.379479	0.00556536	0.21952	-0.0109222
DNAAF3	blue	0.302605	-0.185872	-0.540327	-0.0390987	-0.246502	-0.196498	0.0706164	0.127354	0.264955	-0.0549416	0.939834	0.409586	0.234774	0.308852	0.314782
TEKT1	blue	0.384769	-0.213385	-0.544065	-0.0786491	-0.256731	-0.183253	0.141191	0.148285	0.26104	-0.0734007	0.923556	0.444257	0.262096	0.312018	0.303664
VWCE	blue	0.264571	-0.160209	-0.179583	-0.383627	-0.406532	-0.0249224	0.050468	-0.0637342	-0.00456579	-0.15703	0.753106	0.192872	-0.0864711	-0.0356646	-0.110694
TTC21A	blue	0.335427	-0.319994	-0.155398	-0.425237	-0.35772	0.0783612	0.218481	0.0340558	0.0899431	-0.111836	0.71911	0.20262	-0.0801313	-0.080078	-0.216104
ULK4	blue	0.260338	-0.212781	-0.548369	-0.0905726	-0.294869	-0.169868	0.182023	0.159771	0.350447	0.0257155	0.836788	0.457988	0.131742	0.336868	0.284122
DYNLRB2	blue	0.397574	-0.175423	-0.493529	-0.207375	-0.384513	-0.224272	0.114729	0.0404051	0.192411	-0.121702	0.965042	0.438713	0.19796	0.211469	0.227804
VWA3B	blue	0.359589	-0.187237	-0.526947	-0.040253	-0.236977	-0.219274	0.063972	0.109598	0.275313	-0.0321237	0.923402	0.393155	0.216521	0.287659	0.31118
OR12D2	blue	0.327777	-0.145291	-0.393537	-0.150798	-0.315998	-0.189742	0.0222809	0.0063046	0.170162	-0.0755017	0.917434	0.281292	0.112395	0.132345	0.166318
ZBBX	blue	0.352361	-0.035321	-0.348563	-0.31527	-0.464694	-0.235118	0.00602129	-0.100383	0.0179234	-0.203519	0.896895	0.314388	0.196579	0.0583794	0.152211
ROR2	blue	0.33573	-0.163291	-0.591564	0.0471619	-0.210199	-0.231444	0.0751613	0.141786	0.248327	-0.101445	0.918634	0.361474	0.268991	0.372182	0.366524
ARMC4	blue	0.351023	-0.155192	-0.533756	-0.0946579	-0.309712	-0.243222	0.0804626	0.0775637	0.306262	0.0142103	0.950422	0.416068	0.179355	0.2802	0.322847
C22orf15	blue	0.302441	-0.195255	-0.477541	-0.0761792	-0.229234	-0.1356	0.0877907	0.124944	0.186455	-0.124231	0.965335	0.359197	0.192744	0.231537	0.227575
RSPH10B2	blue	0.267338	-0.14097	-0.484158	-0.0663362	-0.267062	-0.204972	0.0260032	0.071337	0.226049	-0.0695583	0.887749	0.341293	0.170663	0.257457	0.28013
COL22A1	blue	0.350821	-0.123687	-0.391229	-0.0670362	-0.206712	-0.154541	0.045858	0.0606475	0.0289466	-0.21106	0.846936	0.407487	0.256702	0.166161	0.214346
CCDC8	blue	0.251413	-0.547253	-0.602191	0.139905	-0.0126451	0.0463299	0.199141	0.418582	0.670973	0.312003	0.714088	0.266864	-0.120241	0.520862	0.183764
SLC16A5	blue	0.189717	-0.238377	-0.50284	-0.202924	-0.344567	-0.151389	0.148615	0.112084	0.238148	-0.0978973	0.857378	0.481759	0.118981	0.295527	0.18849
FRMPD2	blue	0.345357	-0.305634	-0.5271	-0.0916686	-0.25457	-0.151912	0.0196552	0.15016	0.505808	0.252811	0.846303	0.379525	-0.0192097	0.336559	0.255638
SPATA24	blue	0.337532	-0.38172	-0.501239	-0.087673	-0.188821	-0.0175192	0.297787	0.256864	0.391306	0.108039	0.725462	0.465896	0.0457461	0.316412	0.169964
SLC23A1	blue	0.238155	-0.039004	-0.327479	-0.141467	-0.311705	-0.252281	-0.053911	-0.077196	0.116835	-0.0279167	0.779622	0.286235	0.127164	0.102595	0.210713
DCDC1	blue	0.357312	-0.0534656	-0.440865	-0.113443	-0.30298	-0.253817	0.00401014	-0.00132616	0.106906	-0.156873	0.935483	0.328956	0.215773	0.147152	0.270697
LPAR3	blue	0.290692	-0.134295	-0.490815	0.0239948	-0.182527	-0.175391	0.0664199	0.122284	0.241929	-0.0368909	0.821836	0.222092	0.158819	0.289601	0.284348
DNAI2	blue	0.348861	-0.120891	-0.499951	-0.163726	-0.372994	-0.254118	0.0607024	0.0212412	0.183587	-0.0938504	0.919284	0.426354	0.250253	0.259023	0.286467
LRRC34	blue	0.288128	-0.0898129	-0.438287	-0.241208	-0.409885	-0.249556	0.0560412	-0.000548728	0.352587	0.128112	0.747549	0.319505	0.0796875	0.198786	0.26074
TTC40	blue	0.319424	-0.218386	-0.374499	-0.169751	-0.265907	-0.0634327	0.0887621	0.0880446	0.100508	-0.171876	0.94199	0.322899	0.134912	0.122371	0.0865875
FBXW10	blue	0.46784	-0.220548	-0.481016	-0.225782	-0.361243	-0.164635	0.110423	0.0747362	0.275366	0.00806011	0.837136	0.416782	0.162634	0.226708	0.193736
LRRC48	blue	0.365409	-0.217338	-0.47116	-0.184933	-0.334888	-0.161929	0.107542	0.0713935	0.227846	-0.0562695	0.966839	0.404846	0.14147	0.212835	0.19144
ID4	blue	0.237493	-0.323027	-0.519152	-0.0542963	-0.209313	-0.120905	0.0710659	0.179164	0.627613	0.426609	0.674002	0.320574	-0.190075	0.346119	0.247252
IL16	blue	0.295661	-0.178275	-0.527368	-0.0291911	-0.191585	-0.185708	0.164362	0.15423	0.191991	-0.130367	0.819969	0.602877	0.309958	0.276637	0.336635
CCDC11	blue	0.35662	-0.311336	-0.548179	0.026665	-0.126985	-0.0867033	0.185237	0.252153	0.297662	-0.0664896	0.944867	0.413012	0.187379	0.326273	0.257189
RSPH9	blue	0.340288	-0.310692	-0.59742	0.0373706	-0.147568	-0.0832989	0.208438	0.283995	0.323139	-0.0788395	0.930622	0.42267	0.202432	0.40102	0.276608
EFCAB12	blue	0.425998	-0.276338	-0.447561	-0.108913	-0.221881	-0.0816906	0.161982	0.152599	0.220981	-0.0817479	0.936423	0.307713	0.149318	0.17743	0.145358
AGR3	blue	0.231971	-0.132208	-0.423593	-0.0983331	-0.272808	-0.158053	0.061995	0.0710384	0.104872	-0.204177	0.861975	0.314739	0.278674	0.211628	0.19776
C2orf70	blue	0.262848	-0.300228	-0.580907	0.240712	0.0527984	-0.0471435	0.169074	0.340072	0.269908	-0.128895	0.879704	0.3568	0.22694	0.398168	0.311936
CCDC41	blue	0.18307	0.131443	-0.3436	-0.222151	-0.447355	-0.351996	-0.125212	-0.193355	0.0307729	-0.129297	0.821387	0.255136	0.0929364	0.0457846	0.248784
CCDC13-AS1	blue	0.327871	-0.210605	-0.550121	-0.121655	-0.298203	-0.170818	0.253574	0.162935	0.208772	-0.204678	0.784152	0.481842	0.313621	0.306215	0.264299
2019-03-10	blue	0.264866	-0.184482	-0.194228	-0.352483	-0.37967	-0.0586893	0.0510073	-0.0478351	-0.00532271	-0.195771	0.854486	0.283078	0.0975976	-0.0515546	-0.0615852
PIFO	blue	0.323453	-0.225197	-0.497722	-0.176408	-0.336293	-0.162245	0.110427	0.102513	0.232179	-0.0990293	0.940073	0.442329	0.165991	0.258701	0.204089
IQCK	blue	0.340958	-0.203583	-0.746618	0.181009	-0.155168	-0.354569	0.161968	0.213397	0.528028	0.147613	0.725545	0.45869	0.262703	0.527876	0.524586
LARP7	blue	0.265444	-0.0926458	-0.685636	-0.0650014	-0.333313	-0.371445	0.148822	0.112374	0.388494	0.0308015	0.708177	0.652896	0.30931	0.456557	0.514738
WDR49	blue	0.360199	-0.256745	-0.66547	-0.0598365	-0.320897	-0.251855	0.126557	0.166701	0.474381	0.117873	0.849757	0.507892	0.136145	0.468021	0.384975
BTC	blue	0.319258	-0.143717	-0.558595	0.0935556	-0.15017	-0.236446	0.106521	0.142186	0.245624	-0.0589594	0.849842	0.382686	0.219971	0.332364	0.374561
DNAH12	blue	0.358233	-0.105034	-0.490418	-0.126958	-0.351615	-0.282595	0.0310633	0.0122392	0.215396	-0.0615126	0.927678	0.368002	0.246024	0.236291	0.301815
CATSPERD	blue	0.323837	-0.195725	-0.488818	-0.142672	-0.298534	-0.149685	0.106958	0.100539	0.193675	-0.126263	0.952514	0.396925	0.192953	0.21862	0.211851
CD164L2	blue	0.313999	-0.226161	-0.364112	-0.127398	-0.22359	-0.0545037	0.0892888	0.117793	0.185213	-0.0593929	0.798973	0.308104	0.0945455	0.172965	0.103835
TVP23C	blue	0.259143	-0.33517	-0.586976	-0.000912497	-0.224028	-0.0744259	0.216028	0.26142	0.316428	-0.0714866	0.662671	0.383347	0.183076	0.456925	0.207532
VWA3A	blue	0.378473	-0.148369	-0.455313	-0.221607	-0.40289	-0.224612	0.0399569	-0.00232047	0.212507	-0.0382208	0.941095	0.398268	0.15467	0.191028	0.214601
GRAMD2	blue	0.24115	-0.267577	-0.182158	-0.286635	-0.238395	0.0946946	0.114248	0.0890305	0.0809425	-0.113138	0.816349	0.238212	-0.0744508	-0.01832	-0.119144
TEX26	blue	0.328777	-0.192548	-0.417597	-0.20054	-0.313583	-0.171233	0.0528881	0.0439368	0.26425	0.0473199	0.851533	0.324682	0.089989	0.14785	0.166993
WBSCR28	blue	0.360786	-0.147769	-0.399685	-0.167887	-0.314181	-0.130268	0.0949801	0.0564454	0.0909203	-0.176834	0.853922	0.373217	0.191179	0.173358	0.155079
UNC119B	blue	0.279476	-0.217297	-0.760989	0.160631	-0.155631	-0.350151	0.0971119	0.218735	0.709405	0.396606	0.70429	0.448132	0.0224797	0.574877	0.5812
C11orf16	blue	0.296585	-0.150938	-0.4888	-0.114758	-0.300671	-0.206584	0.0557267	0.0666578	0.224695	-0.0682014	0.964265	0.390539	0.189746	0.239034	0.266837
CHDC2	blue	0.307018	-0.0962428	-0.434186	-0.106698	-0.306258	-0.207471	0.0127356	0.0261589	0.173441	-0.0663858	0.899095	0.331322	0.13905	0.203862	0.250481
B3GNT5	blue	0.265809	-0.0480503	-0.659031	0.00745522	-0.338302	-0.388589	0.0421754	0.0633661	0.335	0.0141528	0.81369	0.611663	0.320337	0.433911	0.517618
MAP3K19	blue	0.36251	-0.159954	-0.490807	-0.0916942	-0.266338	-0.224704	0.0670015	0.0763384	0.230767	-0.046233	0.920751	0.432668	0.23207	0.238935	0.296963
IRX5	blue	0.258281	-0.143607	-0.578253	0.104429	-0.138279	-0.199245	0.0788859	0.176772	0.194259	-0.169586	0.888314	0.356668	0.302255	0.371802	0.374785
DLGAP1-AS1	blue	0.301546	-0.469654	-0.808935	0.37013	0.10132	-0.0722301	0.379989	0.543335	0.585139	0.0758454	0.664742	0.520665	0.291319	0.724473	0.468161
TGIF1	blue	0.27279	-0.345445	-0.789921	0.38102	0.0436242	-0.145291	0.228394	0.430928	0.544599	0.0690784	0.757997	0.378333	0.239603	0.681304	0.500736
CASC2	blue	0.233382	0.035215	-0.346066	-0.313485	-0.502396	-0.309806	-0.0803442	-0.166626	0.119272	-0.0319951	0.85167	0.365142	0.0574234	0.0513697	0.205099
ANXA2R	blue	0.180923	-0.397437	-0.701874	0.303745	0.0536913	-0.0537915	0.343009	0.459555	0.515045	0.0484232	0.666858	0.443117	0.146885	0.604208	0.369917
ODF3B	blue	0.334209	-0.215756	-0.578495	-0.0651712	-0.278223	-0.169188	0.172298	0.165292	0.211284	-0.155306	0.894742	0.483175	0.29995	0.396691	0.296481
C2orf73	blue	0.341181	-0.141317	-0.429139	-0.117442	-0.26423	-0.207608	0.0274472	0.0470796	0.276944	0.0330104	0.865284	0.290465	0.148271	0.163017	0.238221
PPP1R42	blue	0.403939	-0.187292	-0.617229	-0.0711927	-0.303944	-0.263928	0.138715	0.130313	0.291875	-0.0817919	0.928861	0.502586	0.323177	0.353355	0.36989
C10orf53	blue	0.187225	-0.084423	-0.362716	-0.163747	-0.323599	-0.202525	0.0432066	-0.0179661	0.12438	-0.0937433	0.82769	0.293822	0.104913	0.112247	0.179845
GP5	blue	0.296264	-0.197087	-0.448038	-0.122187	-0.264949	-0.145463	0.123502	0.0972683	0.2666	0.00383806	0.821003	0.328638	0.0582093	0.214357	0.203838
C9orf50	blue	0.256864	-0.414538	-0.546763	-0.0416071	-0.203114	0.0014377	0.328006	0.305019	0.336398	-0.0728454	0.673656	0.412998	0.14032	0.408591	0.139567
CCDC89	blue	0.258466	-0.147034	-0.495906	-0.0763985	-0.270244	-0.253938	-0.000611329	0.0542334	0.302786	0.0541564	0.884038	0.451943	0.116872	0.251664	0.312298
C10orf67	blue	0.127806	0.0693784	-0.161053	-0.312359	-0.417491	-0.220277	-0.0715136	-0.209117	-0.150427	-0.251065	0.76048	0.265065	0.105816	-0.099448	0.0506597
NSUN7	blue	0.330153	-0.167064	-0.526666	-0.122634	-0.354276	-0.235746	0.0695507	0.0636454	0.277198	-0.0394618	0.925182	0.402783	0.18845	0.278502	0.284198
FAM216B	blue	0.321238	-0.0870984	-0.454362	-0.127792	-0.317322	-0.270893	0.0260916	0.00386112	0.182415	-0.0602461	0.895575	0.411315	0.243822	0.214816	0.305732
C1orf194	blue	0.324584	-0.268711	-0.389038	-0.110569	-0.236784	-0.0624555	0.126762	0.121132	0.152578	-0.127989	0.905553	0.318865	0.100425	0.163533	0.0905834
AC018865.8	blue	0.263761	-0.0398849	-0.284594	-0.226372	-0.349509	-0.16661	-0.0239063	-0.0534128	0.031373	-0.182875	0.818409	0.241596	0.137081	0.0567222	0.103134
GPR144	blue	0.251393	-0.0872258	-0.348685	-0.123212	-0.2775	-0.187749	-0.010976	-0.0187028	0.0975865	-0.0930866	0.790787	0.247478	0.127763	0.118826	0.178732
KCNE1	blue	0.20529	-0.119391	-0.597862	0.163069	-0.0991067	-0.236321	0.0852591	0.186597	0.251786	-0.101856	0.862074	0.387513	0.318493	0.393443	0.427885
SLC47A2	blue	0.334098	-0.12777	-0.395433	-0.183544	-0.325246	-0.188742	0.053743	0.0179375	0.137811	-0.0990767	0.898284	0.370995	0.204013	0.163577	0.207765
CAPS2	blue	0.252763	0.138818	-0.462826	-0.224714	-0.484603	-0.488259	-0.183933	-0.201952	0.225987	0.0632321	0.856832	0.372327	0.167328	0.141865	0.426671
MAPK15	blue	0.367677	-0.200826	-0.435335	-0.162141	-0.287799	-0.109338	0.116203	0.0985064	0.146968	-0.132622	0.900451	0.36373	0.207055	0.201284	0.171751
NME9	blue	0.308079	-0.275763	-0.361414	-0.275037	-0.306763	-0.00658184	0.189775	0.13355	0.187726	-0.11008	0.875192	0.407251	0.0845093	0.11669	0.0307824
CCDC108	blue	0.345996	-0.140042	-0.373929	-0.221395	-0.339146	-0.157857	0.0665331	0.0113885	0.092231	-0.1495	0.936072	0.357241	0.208486	0.104459	0.150822
GPR135	blue	0.116022	-0.000307763	-0.350982	-0.251639	-0.422364	-0.222832	-0.117942	-0.0898372	0.171713	-0.00565219	0.836996	0.197985	0.012955	0.106522	0.182308
ADIG	blue	0.105708	-0.0858554	-0.304043	-0.218492	-0.344352	-0.12518	-0.0255885	-0.0362431	0.0738141	-0.104253	0.742948	0.215542	0.0189021	0.0996584	0.085099
RAD51B	blue	0.327366	-0.279371	-0.712831	0.12177	-0.130003	-0.233314	0.26938	0.297514	0.48928	0.0696522	0.660788	0.595736	0.323171	0.541008	0.470159
CYB5D1	blue	0.195998	-0.116564	-0.230551	-0.255656	-0.315429	-0.134944	-0.0680635	-0.0670543	0.180038	0.0574662	0.76653	0.201878	-0.0979052	-0.0146689	0.0386642
AC079354.1	blue	0.357345	-0.102012	-0.323414	-0.240763	-0.344154	-0.152242	0.0361287	-0.0317195	0.0914082	-0.0861705	0.906624	0.312508	0.138414	0.0344139	0.125905
SKA2	blue	0.343163	0.107483	-0.601737	-0.136398	-0.455465	-0.536681	0.0108927	-0.106646	0.318819	0.122906	0.693807	0.607104	0.246332	0.32859	0.573873
TMEM198B	blue	0.330389	-0.267471	-0.619815	-0.174769	-0.313522	-0.186544	0.315617	0.212126	0.380161	-0.00346573	0.672245	0.600651	0.415903	0.37322	0.343806
ODF3L1	blue	0.295403	-0.507457	-0.574027	0.0258317	-0.104344	0.0683522	0.350957	0.402302	0.427843	-0.00291712	0.720457	0.391173	0.15982	0.46636	0.138619
CCDC60	blue	0.355672	-0.156986	-0.524691	-0.0589813	-0.270781	-0.233006	0.0628103	0.0905147	0.242658	-0.0594565	0.932264	0.424837	0.23983	0.291907	0.324513
C10orf107	blue	0.245608	0.077454	-0.240254	-0.392	-0.556309	-0.299514	-0.045804	-0.23561	-0.122441	-0.290543	0.809475	0.338386	0.27736	-0.0444157	0.134586
RIPK4	blue	0.146105	-0.172702	-0.559198	0.15472	-0.105678	-0.14606	0.0949439	0.207642	0.211486	-0.146182	0.743209	0.246055	0.239775	0.429404	0.342013
C11orf88	blue	0.354851	-0.10712	-0.471411	-0.123143	-0.323713	-0.242402	0.0596706	0.0297074	0.162766	-0.10675	0.904575	0.401831	0.256176	0.239374	0.291518
EFHC2	blue	0.399976	-0.139126	-0.534766	-0.112749	-0.349721	-0.312717	-0.0615044	0.00253646	0.409363	0.179563	0.860533	0.33387	0.0686428	0.26354	0.329783
MAATS1	blue	0.325113	-0.104822	-0.287142	-0.348208	-0.449274	-0.182535	-0.0216704	-0.106225	0.0897091	-0.0936197	0.837161	0.188867	0.0175338	-0.00161735	0.039767
SDR42E2	blue	0.396139	-0.256039	-0.450248	-0.113414	-0.239373	-0.086001	0.137557	0.134793	0.23573	-0.0597618	0.916011	0.335307	0.0837949	0.206514	0.159944
LRTOMT	blue	0.324359	-0.392092	-0.692234	0.074866	-0.124017	-0.0956656	0.313347	0.368715	0.573181	0.139152	0.836865	0.455616	0.122902	0.493407	0.343679
C21orf128	blue	0.209385	-0.148214	-0.303839	-0.146118	-0.203125	-0.0274462	0.147111	0.109813	0.00495559	-0.27174	0.790049	0.358584	0.234999	0.0855304	0.0814852
C1QTNF8	blue	0.292382	-0.236592	-0.441488	-0.111142	-0.273797	-0.10867	0.0735788	0.0981572	0.25735	-0.01188	0.907342	0.322277	0.000490797	0.235951	0.146508
PROS1	blue	0.143758	0.0342574	-0.715442	0.000244772	-0.408875	-0.518038	-0.00155082	-0.0019116	0.386969	0.0540289	0.660136	0.458356	0.216973	0.558133	0.6006
C14orf180	blue	0.312733	-0.337395	-0.323784	-0.0719048	-0.0737639	0.113524	0.158423	0.232482	0.180064	-0.0705057	0.774797	0.2794	-0.027043	0.136481	0.011019
C8orf12	blue	0.294274	-0.376413	-0.566314	0.0326533	-0.113759	-0.0390049	0.192551	0.307261	0.458643	0.0948005	0.86821	0.410296	0.0923028	0.374432	0.242543
FAM227A	blue	0.376591	-0.117518	-0.38591	-0.0923454	-0.259403	-0.222568	-0.0467531	-0.0196268	0.243154	0.0718124	0.894992	0.249851	-0.0134901	0.0863084	0.200578
EFCAB10	blue	0.0960854	0.135111	-0.102105	-0.312097	-0.402505	-0.215924	-0.110666	-0.240421	-0.153982	-0.218198	0.761265	0.162252	0.043376	-0.186089	0.0327963
PPIL6	blue	0.211357	-0.220384	-0.407479	0.103337	-0.0138266	-0.0294607	0.0842195	0.224777	0.242165	-0.0320869	0.82668	0.221354	0.0790423	0.194428	0.187675
CD24P4	blue	0.295134	-0.113548	-0.485285	0.00293411	-0.201299	-0.23576	0.0651326	0.0786108	0.168659	-0.108566	0.890578	0.400736	0.284711	0.255548	0.326508
MORN5	blue	0.407844	-0.33134	-0.562524	-0.0675813	-0.224923	-0.0910484	0.250002	0.237582	0.317125	-0.0584852	0.940667	0.464989	0.182763	0.331988	0.22122
ATP4B	blue	0.299893	-0.131077	-0.454748	-0.1738	-0.33983	-0.195924	0.0996104	0.0439269	0.123235	-0.166738	0.897989	0.441262	0.264097	0.182135	0.210352
LRRC70	blue	0.213374	0.0750374	-0.476412	-0.216589	-0.494133	-0.374844	-0.0612746	-0.112665	0.157602	-0.0937911	0.753526	0.328023	0.243553	0.243207	0.348798
TMEM212	blue	0.237224	-0.17148	-0.382605	-0.136638	-0.267544	-0.125756	0.0985412	0.0677829	0.137161	-0.13213	0.873361	0.304939	0.171932	0.143786	0.145992
CCDC30	blue	0.176787	0.015664	-0.187082	-0.223453	-0.293613	-0.149738	-0.0380463	-0.1074	-0.0651992	-0.212161	0.826576	0.199742	0.0850051	-0.0989931	0.06512
TRDN	blue	0.442549	-0.158631	-0.568842	-0.0500774	-0.279972	-0.305399	0.074315	0.0510302	0.323489	0.0493977	0.852351	0.39335	0.13316	0.286898	0.359863
AKAP14	blue	0.291985	-0.181559	-0.403475	-0.0754178	-0.234756	-0.11046	0.0901993	0.0959093	0.14964	-0.140143	0.918151	0.264053	0.140638	0.198238	0.157801
ZNF396	blue	0.267902	0.0406617	-0.442782	-0.354753	-0.534718	-0.419243	0.00140955	-0.155123	0.224208	0.034597	0.709183	0.474527	0.267881	0.113159	0.330758
KIF24	blue	0.245148	-0.0409522	-0.237055	-0.379238	-0.486879	-0.162074	-0.0806194	-0.140568	0.188666	0.100167	0.732585	0.112374	-0.148169	0.00328007	0.038306
CCDC42B	blue	0.344687	-0.159782	-0.41076	-0.17648	-0.308921	-0.144089	0.0941611	0.0537303	0.120724	-0.138261	0.920045	0.398137	0.213791	0.166056	0.183223
TMEM232	blue	0.282198	-0.0243307	-0.424966	-0.257422	-0.466187	-0.33377	-0.0592565	-0.112438	0.208921	0.0129526	0.928142	0.358362	0.109125	0.127827	0.267587
FAM183A	blue	0.367401	-0.1483	-0.490641	-0.0979313	-0.282383	-0.208728	0.105407	0.0765806	0.180449	-0.111815	0.916612	0.395196	0.253009	0.254151	0.284464
EFCAB6	blue	0.310168	-0.112229	-0.354401	-0.347441	-0.490557	-0.190217	0.0421297	-0.079938	0.153198	-0.0273395	0.878032	0.28392	0.0260955	0.0816726	0.105593
C17orf82	blue	0.203693	-0.240098	-0.549612	-0.142606	-0.304632	-0.113591	0.197008	0.185575	0.283977	-0.0695807	0.788745	0.408559	0.134135	0.370677	0.212169
DYNC2H1	blue	0.222989	0.0896806	-0.397955	-0.343622	-0.577349	-0.457435	-0.183089	-0.246807	0.275578	0.170952	0.78922	0.326132	0.0013962	0.0833706	0.312419
CDHR4	blue	0.300386	-0.0958391	-0.461099	-0.114269	-0.329642	-0.254852	0.00779784	0.00368894	0.192052	-0.0456334	0.910251	0.349184	0.176207	0.221022	0.287439
IFT140	blue	0.332413	-0.538164	-0.541427	0.224323	0.187491	0.171974	0.300666	0.512761	0.490493	0.117154	0.721448	0.282066	-0.0185784	0.393443	0.147088
DNAJB13	blue	0.283651	-0.240274	-0.418309	-0.185148	-0.312244	-0.108072	0.105211	0.0901436	0.199556	-0.0910919	0.918821	0.338723	0.0819831	0.192263	0.114657
CCDC157	blue	0.131783	-0.274941	-0.0850571	-0.1594	-0.0995443	0.206326	0.111251	0.12696	-0.0393333	-0.219373	0.746858	0.103287	-0.081307	-0.0956679	-0.214324
AC002472.13	blue	0.359971	-0.0725688	-0.363122	-0.189752	-0.351541	-0.230607	-0.0307458	-0.0533939	0.105947	-0.100922	0.87138	0.28742	0.154331	0.104946	0.194508
LDLRAD2	blue	0.323296	-0.203006	-0.430992	-0.160364	-0.299777	-0.154062	0.0742796	0.0673	0.232298	-0.026102	0.938733	0.364456	0.0860131	0.175134	0.171929
C1orf204	blue	0.190579	-0.0989124	-0.248327	-0.2279	-0.316678	-0.195129	0.064512	-0.0703373	0.137736	-0.0283322	0.700069	0.232939	0.0475066	-0.0266371	0.0675325
ENO4	blue	0.25178	-0.0316988	-0.409088	-0.104573	-0.268216	-0.23196	0.150647	0.0167319	-0.0456171	-0.334798	0.751738	0.405202	0.5058	0.140211	0.247355
TCTEX1D4	blue	0.220324	-0.209046	-0.512999	0.000484818	-0.189822	-0.0640613	0.10618	0.197766	0.204269	-0.132556	0.800384	0.291724	0.183184	0.371466	0.209486
CERKL	blue	0.282487	-0.0714127	-0.562026	-0.0185105	-0.297058	-0.328509	0.0246704	0.0379979	0.20384	-0.0896956	0.893905	0.457129	0.25413	0.332328	0.399991
C9orf171	blue	0.343778	-0.190961	-0.50575	-0.0746592	-0.245435	-0.166494	0.116535	0.129402	0.217778	-0.0949753	0.924727	0.430702	0.23752	0.281456	0.274307
C12orf55	blue	0.322673	-0.141835	-0.570021	-0.0509635	-0.286161	-0.253641	0.0372445	0.103655	0.279492	-0.0469645	0.937873	0.412107	0.218237	0.319843	0.352085
SNTN	blue	0.266255	-0.103549	-0.276418	-0.229978	-0.361998	-0.162704	0.0153639	-0.0606259	0.117058	-0.0138833	0.786291	0.211936	-0.00481551	0.0622993	0.0960027
C1orf192	blue	0.368517	-0.132899	-0.540293	-0.141589	-0.359976	-0.265488	0.0593377	0.0442286	0.298417	0.0240217	0.941883	0.448104	0.162168	0.269553	0.326149
FAM47E	blue	0.291971	-0.103824	-0.517341	-0.0912306	-0.321922	-0.273281	0.124786	0.0587607	0.277217	-0.017306	0.741465	0.387885	0.242929	0.270657	0.303986
AL450307.1	blue	0.338951	-0.208623	-0.421025	-0.151329	-0.315561	-0.130234	0.0667658	0.0676921	0.226742	0.00278506	0.85275	0.306852	0.0830848	0.216988	0.160083
FAM179A	blue	0.334974	-0.312363	-0.518125	-0.0228451	-0.162562	-0.0987276	0.140194	0.20057	0.360349	0.0473148	0.859925	0.37245	0.117006	0.27853	0.215496
C16orf93	blue	0.0579758	-0.12416	-0.239903	-0.128136	-0.179216	0.0516017	0.103395	0.0922365	-0.082703	-0.315132	0.734085	0.220373	0.0931267	0.0555923	-0.00818731
COLCA1	blue	0.285531	-0.119462	-0.44888	-0.330456	-0.487506	-0.266869	-0.00645763	-0.0502704	0.358021	0.144402	0.828809	0.382458	0.0396491	0.186542	0.234733
C20orf96	blue	0.216474	-0.382318	-0.371477	0.094991	0.0416024	0.082407	0.169112	0.279648	0.259384	-0.0276142	0.784592	0.302487	-0.052372	0.206574	0.0304689
TTC30B	blue	0.275203	0.0174071	-0.52025	-0.203221	-0.416062	-0.393525	-0.0366842	-0.0579517	0.309167	0.0838706	0.81528	0.472412	0.160985	0.215377	0.391722
Z98881.1	blue	0.355763	-0.176705	-0.273694	-0.222206	-0.301934	-0.100079	0.107076	-0.0102448	0.0748716	-0.0916348	0.766079	0.200647	0.0305676	0.0106735	0.0186791
DTHD1	blue	0.295011	-0.0665157	-0.542319	-0.0958843	-0.345921	-0.31739	0.0453561	0.0300878	0.241167	-0.0620485	0.904905	0.409939	0.304432	0.30687	0.395993
NEK5	blue	0.26933	-0.0116693	-0.54916	-0.0698948	-0.308446	-0.335847	-0.0153317	0.0149927	0.224486	-0.0770312	0.901415	0.405297	0.231784	0.287619	0.426086
OR2B4P	blue	0.350275	-0.165967	-0.427766	-0.130315	-0.268331	-0.146369	0.0830944	0.0821179	0.208495	-0.0644913	0.930075	0.354817	0.133297	0.191352	0.209485
C9orf169	blue	0.320702	-0.32106	-0.170036	-0.26442	-0.232192	0.0942674	0.15947	0.0667764	0.0579687	-0.117497	0.753727	0.243063	-0.113848	-0.0312737	-0.161282
SLC28A3	blue	0.26649	-0.177549	-0.550184	-0.105658	-0.305581	-0.223238	0.0633657	0.0972839	0.317635	-0.00612108	0.875686	0.351879	0.165801	0.320708	0.305573
COL4A6	blue	0.310056	-0.147416	-0.51207	-0.0459426	-0.254835	-0.228309	0.00192468	0.0680938	0.254884	-0.03104	0.919025	0.323085	0.130745	0.277869	0.298186
DNAH10	blue	0.349619	-0.129828	-0.411447	-0.116661	-0.256074	-0.17021	0.0539731	0.0484679	0.149632	-0.0989086	0.947483	0.314421	0.161462	0.135873	0.209891
FRMPD2P1	blue	0.220211	-0.107385	-0.479113	-0.0696321	-0.262682	-0.210277	-0.0237388	0.0651779	0.24868	-0.0242105	0.797359	0.322533	0.129415	0.259238	0.278879
WDR96	blue	0.368029	-0.0880941	-0.446939	-0.171112	-0.355783	-0.248557	0.00317935	-0.00982515	0.142905	-0.122948	0.948227	0.377478	0.194693	0.165755	0.245571
CTC-301O7.4	blue	0.333484	-0.251461	-0.564207	-0.0137267	-0.213877	-0.199064	0.14948	0.156476	0.378467	0.0622207	0.871893	0.417009	0.0940835	0.316047	0.299016
CCDC180	blue	0.301701	-0.201709	-0.507518	-0.0644694	-0.223825	-0.130997	0.146185	0.150579	0.19499	-0.164085	0.947849	0.359205	0.191135	0.247123	0.231817
C4orf22	blue	0.324671	-0.107865	-0.486969	-0.128876	-0.340854	-0.240917	0.0339982	0.0277351	0.187569	-0.0888818	0.941737	0.399369	0.228509	0.240077	0.290808
MEIG1	blue	0.2521	-0.186455	-0.519725	0.0756667	-0.0881184	-0.151471	0.231656	0.230841	0.240418	-0.113762	0.730747	0.486784	0.23463	0.304984	0.317926
ZNF311	blue	0.254406	-0.229527	-0.404159	-0.119366	-0.2191	-0.0864224	0.224159	0.13074	0.172976	-0.097875	0.694659	0.385774	0.149528	0.184803	0.145439
CCDC151	blue	0.278406	-0.490796	-0.570064	0.414658	0.308008	0.143842	0.282893	0.559641	0.409322	-0.0288587	0.740972	0.321335	0.136223	0.454344	0.232211
NUP62CL	blue	0.308678	-0.134758	-0.58201	-0.0602729	-0.291937	-0.244538	0.151441	0.121214	0.238491	-0.131694	0.922804	0.459149	0.284104	0.337713	0.351206
SLC34A3	blue	0.304201	-0.245248	-0.297002	-0.186556	-0.2428	-0.00658476	0.154037	0.0798815	0.163993	-0.0283314	0.745198	0.254302	-0.0140761	0.0836375	-0.00483279
CCDC69	blue	0.210071	-0.249958	-0.782203	0.206809	-0.100405	-0.263632	0.197116	0.312937	0.513919	0.0566247	0.750715	0.554203	0.225094	0.634408	0.543551
RASSF9	blue	0.238266	-0.058235	-0.567089	0.0812352	-0.205849	-0.313392	-0.0138497	0.0724922	0.223765	-0.0700416	0.870779	0.413248	0.260255	0.361626	0.44462
Y_RNA	blue	0.321128	-0.233702	-0.494114	-0.0924617	-0.249024	-0.137734	0.109114	0.121667	0.201734	-0.127571	0.931633	0.338658	0.136996	0.234201	0.183138
FAM83H-AS1	blue	0.213702	-0.166928	-0.368441	-0.140723	-0.271303	-0.107917	0.0466186	0.0594789	0.200216	-0.0281966	0.897809	0.287358	-0.00290559	0.129305	0.135376
ECT2L	blue	0.29335	-0.145009	-0.403344	-0.214074	-0.389383	-0.190296	0.0513818	-0.00243668	0.212265	-0.0425225	0.882397	0.239907	0.0677119	0.167411	0.161416
FANK1	blue	0.343399	-0.273678	-0.489536	-0.112333	-0.271198	-0.0976567	0.12886	0.142589	0.24693	-0.0646406	0.948136	0.364322	0.066459	0.250741	0.155546
CCDC162P	blue	0.300641	-0.0812684	-0.322759	-0.215543	-0.348628	-0.187843	-0.012389	-0.0618935	0.0462525	-0.141915	0.884136	0.295942	0.106553	0.0567546	0.128662
C6orf164	blue	0.215982	-0.172477	-0.362858	-0.179816	-0.307543	-0.130436	0.00294296	0.0246948	0.228699	0.0468084	0.754535	0.328254	0.0386484	0.138592	0.140965
C1orf141	blue	0.289791	-0.0892322	-0.541222	-0.145733	-0.382931	-0.292071	0.0492989	0.0341756	0.289876	-0.0167837	0.889457	0.412232	0.232282	0.286061	0.342164
LIPJ	blue	0.199879	-0.0327312	-0.362677	-0.161132	-0.358154	-0.232348	-0.0345389	-0.0648796	0.0668293	-0.155879	0.818846	0.270263	0.148038	0.136121	0.182781
TRAF3IP1	blue	0.19287	0.114814	-0.31693	-0.291905	-0.4533	-0.306215	-0.0586063	-0.186418	0.00357467	-0.141957	0.783558	0.293021	0.0425312	0.0408552	0.226074
OR2H1	blue	0.262419	-0.181764	-0.392034	-0.131949	-0.282992	-0.119327	0.0759473	0.0546629	0.118654	-0.144733	0.878656	0.317504	0.10612	0.16458	0.121938
C9orf135	blue	0.261638	-0.157257	-0.518948	0.014477	-0.221249	-0.167833	0.0673458	0.145203	0.194834	-0.121846	0.875655	0.374095	0.255879	0.358927	0.305017
TTC25	blue	0.345767	-0.313572	-0.410766	-0.243587	-0.32358	-0.0484174	0.206308	0.115892	0.151785	-0.168349	0.882835	0.342752	0.0856687	0.174216	0.0367833
FAM74A3	blue	0.305686	-0.149854	-0.464133	-0.118375	-0.297968	-0.226912	-0.0147345	0.0381836	0.263823	0.0281206	0.86683	0.366422	0.124021	0.210719	0.254483
TCTN1	blue	0.0727913	-0.150382	-0.467939	0.130958	-0.0950033	-0.133935	0.00175793	0.165809	0.316086	-0.00854727	0.792253	0.177696	0.0493093	0.290317	0.256187
FAM221B	blue	0.198126	-0.0848226	-0.380854	-0.142374	-0.310425	-0.206731	-0.0448495	-0.0114914	0.17913	-0.0378141	0.720303	0.173295	0.164915	0.157171	0.209511
CXorf30	blue	0.31392	-0.0112294	-0.301246	-0.24665	-0.391801	-0.232845	-0.0650626	-0.119048	0.0396022	-0.118032	0.881783	0.236029	0.0962706	0.0116734	0.1455
TMEM231	blue	0.201371	-0.209269	-0.360622	-0.179099	-0.298958	-0.0758281	0.0529975	0.0684861	0.278893	0.0545718	0.876899	0.223198	-0.0813003	0.142788	0.090572
C4orf47	blue	0.241614	-0.0352546	-0.187578	-0.206196	-0.263833	-0.112432	-0.0016993	-0.0682688	-0.154284	-0.35968	0.777455	0.217748	0.21786	-0.0880962	0.0164362
TTLL10-AS1	blue	0.214036	-0.036212	-0.316486	-0.232392	-0.370666	-0.265357	0.0232926	-0.109955	0.088022	-0.0725867	0.718057	0.332243	0.141481	0.0635654	0.172648
AL592528.1	blue	0.230994	-0.176475	-0.456343	-0.0505512	-0.188767	-0.115762	0.104126	0.139525	0.125593	-0.19119	0.85578	0.411716	0.161969	0.243419	0.19791
GMNC	blue	0.328573	-0.0766613	-0.381533	-0.117568	-0.273282	-0.230079	0.0184235	-0.00636428	0.129459	-0.0755943	0.871991	0.431135	0.187247	0.112637	0.243787
TTC23L	blue	0.238992	-0.0208271	-0.343387	-0.175319	-0.315415	-0.229639	0.0112559	-0.0456684	0.0577316	-0.158411	0.832483	0.328006	0.257995	0.0400567	0.217612
C21orf62	blue	0.176967	-0.19285	-0.674873	0.316996	0.0217944	-0.166876	0.116784	0.327203	0.27728	-0.16153	0.722183	0.432989	0.427102	0.583863	0.46574
RP11-503N18.1	blue	0.249581	-0.224214	-0.413989	-0.14793	-0.276515	-0.0560754	0.0530961	0.122491	0.184677	-0.102167	0.87399	0.283984	0.0636652	0.240842	0.122919
ANKUB1	blue	0.357439	-0.121187	-0.499427	-0.106361	-0.321696	-0.274098	0.0318873	0.0279387	0.272602	-0.000527885	0.930409	0.360694	0.152514	0.242614	0.311534
H1FX-AS1	blue	0.296437	-0.496626	-0.455536	0.0403591	0.0400022	0.152845	0.384116	0.402973	0.213246	-0.208493	0.679329	0.419523	0.163277	0.304621	0.0212899
WDR52	blue	0.317813	-0.0261539	-0.501155	-0.00619701	-0.24172	-0.303616	-0.0153599	0.0193266	0.165463	-0.106363	0.936775	0.354552	0.227396	0.198425	0.367761
CCDC19	blue	0.346885	-0.162758	-0.477601	-0.117915	-0.30313	-0.189182	0.0888856	0.0796582	0.172464	-0.128293	0.902637	0.400999	0.262631	0.26652	0.262227
CRIP1	blue	0.221738	-0.301687	-0.528263	-0.0159529	-0.186858	-0.0826791	0.291	0.22775	0.252685	-0.0823392	0.833588	0.482582	0.154128	0.356247	0.211732
LCAT	blue	0.338619	-0.414284	-0.732721	0.237531	0.0244884	-0.0560608	0.323063	0.441586	0.531011	0.0732357	0.737704	0.492497	0.11386	0.594627	0.36183
RRM2P3	blue	0.251547	-0.212982	-0.375753	-0.0708893	-0.234172	-0.0921236	0.0219863	0.0826022	0.252543	0.0215223	0.767373	0.189593	0.0041182	0.200362	0.126192
TTLL3	blue	0.30095	-0.290043	-0.28517	-0.289291	-0.318483	0.00339279	0.13444	0.0561552	0.237275	0.042739	0.741189	0.218711	-0.111393	0.0508283	-0.0634372
MYCBP	blue	0.167737	-0.123756	-0.740704	0.0623326	-0.256382	-0.306712	0.208901	0.219632	0.375029	-0.0849812	0.725244	0.481209	0.36594	0.587199	0.506015
C10orf105	blue	0.328224	-0.432246	-0.671391	0.0987154	-0.084279	-0.0484405	0.343693	0.414662	0.562055	0.112371	0.712514	0.426945	0.154036	0.534781	0.301006
RAD51AP2	blue	0.293526	-0.0729619	-0.532411	-0.0263728	-0.289482	-0.301707	0.0155295	0.0391846	0.239886	-0.0529229	0.882522	0.386656	0.17804	0.259811	0.370204
AC025171.1	blue	0.158722	-0.187886	-0.597976	0.0769581	-0.185013	-0.232846	0.16003	0.180301	0.391392	0.0687585	0.776493	0.455087	0.153707	0.398976	0.39987
FAM166B	blue	0.352208	-0.159277	-0.499652	-0.114934	-0.298585	-0.213466	0.0673208	0.0671415	0.208687	-0.0934147	0.944899	0.409569	0.205912	0.24168	0.266133
C5orf49	blue	0.354942	-0.435905	-0.68858	0.0630331	-0.100335	-0.0192585	0.322282	0.416011	0.462959	-0.0331105	0.844972	0.482885	0.214748	0.504734	0.279687
TTC34	blue	0.301567	-0.21946	-0.510835	-0.193907	-0.366883	-0.169011	0.126928	0.0898979	0.25744	-0.072986	0.933214	0.401726	0.153173	0.254325	0.196213
RP3-382I10.3	blue	0.146323	-0.126991	-0.384346	-0.0006911	-0.150423	-0.121154	0.0711525	0.102586	0.109984	-0.170563	0.749827	0.24376	0.182055	0.159647	0.187315
LINC01014	blue	0.23367	-0.150857	-0.504314	-0.0301644	-0.224817	-0.158369	0.0752047	0.123507	0.14916	-0.19858	0.919799	0.353837	0.220183	0.289263	0.255277
AC104809.2	blue	0.347712	-0.181329	-0.446757	-0.0847941	-0.249709	-0.176308	0.0725241	0.0804284	0.214347	-0.0444832	0.903057	0.373787	0.171424	0.218658	0.232803
AC097468.4	blue	0.271913	-0.180361	-0.48869	0.015343	-0.180859	-0.175195	0.10334	0.139216	0.262197	-0.0491527	0.891486	0.352993	0.182006	0.27868	0.282908
WARS2-IT1	blue	0.280474	-0.339093	-0.507011	0.0212059	-0.114795	-0.050111	0.224716	0.268369	0.327043	-0.0522084	0.748097	0.431029	0.122009	0.328479	0.181459
C17orf72	blue	0.205221	-0.144263	-0.290052	-0.144657	-0.251435	-0.0545653	0.019528	0.0345155	0.0518253	-0.159899	0.893383	0.237764	0.0662538	0.0719981	0.054791
TEX26-AS1	blue	0.162814	-0.105342	-0.378915	-0.12905	-0.297682	-0.16956	0.0117971	0.0279417	0.22518	0.016592	0.761029	0.250373	-0.01518	0.193195	0.200562
RP3-509I19.1	blue	0.276472	-0.0952601	-0.476672	0.0256655	-0.176825	-0.261972	0.024055	0.0613354	0.218841	-0.0542321	0.788328	0.243845	0.176994	0.220456	0.310676
AC005281.2	blue	0.254452	-0.102511	-0.285547	-0.187622	-0.283177	-0.137448	0.0103543	-0.0079484	0.096326	-0.0845273	0.803075	0.34083	0.108769	0.0507078	0.114591
AC005487.2	blue	0.285418	-0.0764326	-0.272746	-0.238659	-0.322914	-0.123907	0.0631841	-0.0360397	0.0199697	-0.157312	0.829984	0.263309	0.101461	0.000465742	0.064429
SATB2-AS1	blue	0.307278	-0.18357	-0.578008	0.0393243	-0.188898	-0.172461	0.158398	0.189215	0.227679	-0.136371	0.876636	0.404738	0.279161	0.353594	0.31178
RP11-57H12.3	blue	0.363892	-0.202844	-0.464018	-0.107157	-0.228839	-0.128348	0.0750692	0.131948	0.264381	-0.0121215	0.797686	0.348709	0.204129	0.244565	0.232026
AC104809.3	blue	0.360638	-0.158495	-0.433942	-0.16371	-0.331269	-0.193393	0.0555925	0.0278004	0.178115	-0.0726024	0.908853	0.358787	0.157636	0.204311	0.215945
ST7-AS2	blue	0.12089	-0.150608	-0.377088	-0.0672719	-0.17646	-0.0312003	0.0580119	0.137426	0.124769	-0.124247	0.730068	0.306248	0.101205	0.196862	0.144329
RP11-128M1.1	blue	0.280204	-0.224047	-0.373116	-0.0552233	-0.168593	-0.00583421	0.175746	0.159526	0.111536	-0.170466	0.85255	0.265682	0.120279	0.160885	0.0863367
TEX41	blue	0.238133	-0.263565	-0.43342	-0.104704	-0.253405	-0.118616	0.200502	0.122549	0.282245	0.0294954	0.778471	0.327141	0.0214805	0.227199	0.166297
AC005281.1	blue	0.216158	-0.128867	-0.453021	-0.0438378	-0.236398	-0.221104	0.00141461	0.0554534	0.221673	-0.0598642	0.874318	0.283494	0.165812	0.224625	0.262038
AC068535.2	blue	0.337383	-0.201422	-0.403915	-0.214582	-0.345918	-0.149459	0.141557	0.0607077	0.238175	-0.0165115	0.731537	0.404903	0.149361	0.19345	0.1516
EPPK1	blue	0.344917	-0.230141	-0.500416	-0.0273168	-0.198172	-0.133246	0.0846033	0.149758	0.257585	-0.0316986	0.934022	0.377716	0.128359	0.271035	0.250853
LINC00310	blue	0.28008	-0.191134	-0.528134	-0.0141796	-0.200709	-0.197083	0.115853	0.152376	0.392516	0.119271	0.668346	0.491637	0.174398	0.312451	0.337835
RP11-222A11.1	blue	0.12371	-0.0709118	-0.519209	-0.0268126	-0.312078	-0.28352	0.100514	0.0536305	0.251323	-0.0621399	0.710039	0.293698	0.230043	0.348082	0.357621
MFI2-AS1	blue	0.310007	-0.494549	-0.444019	0.0239226	-0.00660803	0.131998	0.344372	0.371407	0.338862	-0.000762531	0.69959	0.38368	-0.025139	0.27336	0.0232284
RP3-467K16.4	blue	0.248604	-0.134918	-0.449256	0.0115566	-0.201254	-0.176084	0.108232	0.0796224	0.143227	-0.116662	0.821468	0.355992	0.141738	0.20456	0.221271
AC097713.3	blue	0.336022	-0.0861649	-0.297715	-0.198662	-0.286772	-0.158783	-0.0486332	-0.0291208	0.140199	-0.0332701	0.806196	0.306972	0.0489685	0.059227	0.129453
C1orf143	blue	0.309925	-0.192109	-0.482223	-0.0861355	-0.272218	-0.166724	0.109659	0.103858	0.213744	-0.0866586	0.759942	0.301451	0.179666	0.266469	0.240303
PROB1	blue	0.303992	-0.338052	-0.622283	0.18724	0.0085141	-0.0380483	0.104244	0.353666	0.516762	0.183312	0.808845	0.371506	-0.0268539	0.463543	0.320558
WEE2-AS1	blue	0.388229	-0.250948	-0.517299	-0.229312	-0.411553	-0.208959	0.176147	0.0673763	0.344032	0.0623614	0.786039	0.448118	0.103596	0.258956	0.208957
RP11-481H12.1	blue	0.270258	-0.283932	-0.57119	-0.00953093	-0.198386	-0.121731	0.194663	0.235693	0.315906	-0.0586002	0.860586	0.494731	0.256501	0.376591	0.277895
ANKRD66	blue	0.287475	-0.0648377	-0.455506	-0.163605	-0.377795	-0.287037	-0.0128518	-0.0363032	0.17875	-0.0579887	0.942067	0.402176	0.199476	0.19152	0.286336
STMND1	blue	0.265776	-0.197165	-0.49554	-0.0817607	-0.256296	-0.15807	0.116743	0.128828	0.196304	-0.154573	0.901383	0.385772	0.253831	0.269707	0.237242
RP11-122M14.1	blue	0.354946	-0.17183	-0.491658	-0.10958	-0.282059	-0.211233	0.0943298	0.0743888	0.222272	-0.0786539	0.954943	0.412441	0.223554	0.210636	0.25528
AC105402.4	blue	0.209252	-0.154589	-0.350974	-0.108466	-0.22782	-0.0638612	0.146285	0.0874977	0.111687	-0.115554	0.729938	0.259542	0.0808597	0.144176	0.105925
AC018865.9	blue	0.264906	-0.15602	-0.298321	-0.113327	-0.209944	-0.0684465	0.0665699	0.0572645	0.121137	-0.0863489	0.780612	0.265421	0.0714432	0.0945925	0.0842948
AC131180.4	blue	0.414996	-0.146497	-0.500214	-0.141897	-0.343821	-0.254428	0.0616822	0.02443	0.214663	-0.0681185	0.922695	0.390065	0.19017	0.230338	0.270883
CTB-51J22.1	blue	0.257742	-0.268956	-0.517837	-0.00649397	-0.131954	-0.0849517	0.198723	0.261157	0.344444	0.0019347	0.757644	0.422364	0.21716	0.313544	0.258905
RP11-13E1.5	blue	0.295804	-0.261131	-0.512391	0.00218038	-0.178497	-0.128129	0.130658	0.179856	0.299417	-0.024075	0.903866	0.319924	0.150445	0.29033	0.236178
XXbac-BPG308J9.3	blue	0.365101	-0.207818	-0.468132	-0.154271	-0.30687	-0.16555	0.0977685	0.0788454	0.220921	-0.0692075	0.925598	0.368829	0.177499	0.224679	0.205758
RP4-665N4.4	blue	0.395194	-0.238101	-0.420312	-0.114191	-0.227992	-0.111372	0.0619585	0.105724	0.251722	0.0112949	0.8252	0.389515	0.0955025	0.16493	0.146157
RNF224	blue	0.35216	-0.154248	-0.218374	-0.324915	-0.340173	-0.053875	0.0387737	-0.0475213	0.101721	-0.0305993	0.751663	0.281459	-0.0525649	-0.0255419	-0.0288669
AC104809.4	blue	0.33617	-0.24813	-0.583231	0.109926	-0.11735	-0.159589	0.170029	0.219994	0.307681	-0.0322444	0.832222	0.371184	0.130174	0.371349	0.317607
RP3-467K16.2	blue	0.298048	-0.281009	-0.484547	0.00514689	-0.128398	-0.083006	0.134135	0.203512	0.231372	-0.100393	0.889076	0.416346	0.166386	0.24469	0.190067
RP11-13P5.2	blue	0.219815	-0.220588	-0.488518	0.0233776	-0.184943	-0.0818896	0.129383	0.179376	0.146972	-0.192316	0.823507	0.304308	0.226312	0.34398	0.217138
RP4-666F24.3	blue	0.300295	-0.209654	-0.484115	-0.0342623	-0.214104	-0.162785	0.0859266	0.127415	0.225536	-0.0979244	0.931145	0.350211	0.186512	0.260808	0.233643
RP11-308D16.4	blue	0.243614	-0.243651	-0.248233	-0.0971052	-0.113698	0.0668955	0.0973242	0.146331	0.151072	-0.0584734	0.792661	0.201104	-0.078332	0.0439983	-0.0358124
AC068057.2	blue	0.337369	-0.387343	-0.446246	-0.122065	-0.193137	0.0107694	0.262694	0.231107	0.396668	0.122992	0.739241	0.302753	-0.075048	0.245348	0.0678521
RP3-439F8.1	blue	0.305441	-0.228434	-0.571105	-0.0579927	-0.251155	-0.124167	0.139615	0.194113	0.243636	-0.12976	0.873081	0.38732	0.275537	0.355556	0.26881
AC116614.1	blue	0.213642	-0.198238	-0.483701	0.0387093	-0.116044	-0.0688741	0.179524	0.219734	0.0945653	-0.29451	0.724962	0.337813	0.250478	0.315872	0.199786
MFRP	blue	0.273314	0.00614281	-0.347802	-0.19573	-0.329072	-0.213322	0.00571664	-0.0314273	0.0113832	-0.238494	0.771762	0.370288	0.243872	0.11548	0.212671
TM4SF19-AS1	blue	0.197249	0.0250208	-0.320732	-0.282376	-0.47878	-0.299263	-0.0470004	-0.158719	0.16102	0.0585301	0.708728	0.364692	0.0748386	0.0837963	0.215675
AC010729.2	blue	0.273126	-0.10067	-0.379559	-0.241012	-0.356507	-0.15197	0.0932616	0.0173327	0.0689562	-0.185259	0.837489	0.462053	0.25637	0.121584	0.176228
RP11-517P14.7	blue	0.258361	0.00488808	-0.177853	-0.378882	-0.472318	-0.191302	-0.0510128	-0.18563	-0.104146	-0.253133	0.747804	0.208742	0.0634814	-0.0705999	-0.00175009
RP11-268F1.3	blue	0.288232	-0.121465	-0.464064	-0.0844819	-0.260448	-0.198732	0.0664803	0.0689399	0.158864	-0.133786	0.908169	0.439429	0.243481	0.208764	0.256838
DNAJC9-AS1	blue	0.34024	-0.0403263	-0.302698	-0.287586	-0.433338	-0.222249	-0.0619263	-0.116066	0.130793	-0.0261495	0.85199	0.238685	0.0195686	0.0328246	0.11561
B3GNT9	blue	0.104883	-0.220285	-0.662507	0.0847213	-0.116634	-0.11389	0.298582	0.346151	0.282253	-0.207978	0.669194	0.57285	0.486062	0.528976	0.401509
ZNF295-AS1	blue	0.34713	-0.253975	-0.451331	-0.116863	-0.264763	-0.0962588	0.164364	0.140205	0.214115	-0.0877312	0.847586	0.383281	0.0929826	0.257154	0.155767
HMGB3P5	blue	0.320957	-0.251965	-0.529392	-0.0737407	-0.261421	-0.154461	0.109867	0.137061	0.267938	-0.0531321	0.894511	0.387262	0.220406	0.277842	0.240287
RP4-668G5.1	blue	0.286993	-0.242892	-0.513454	-0.0113076	-0.175583	-0.0687784	0.262223	0.227128	0.199399	-0.132102	0.688951	0.492698	0.201658	0.352826	0.224118
AC009133.14	blue	0.304349	-0.398995	-0.399666	0.0136225	-0.0151795	0.0504706	0.189084	0.258973	0.294922	0.0249791	0.696661	0.306268	-0.0222625	0.211171	0.0496578
GOLGA2B	blue	0.403079	-0.285849	-0.474434	-0.195778	-0.313103	-0.121778	0.121551	0.11472	0.303796	2.55284e-05	0.91899	0.379322	0.0583774	0.216602	0.139092
RPS27P25	blue	0.396093	-0.294875	-0.491082	-0.184181	-0.322122	-0.0973786	0.208349	0.134609	0.300654	0.0138674	0.839659	0.397748	0.0832306	0.264527	0.149822
RP11-64D22.2	blue	0.367681	-0.219751	-0.561544	-0.0554592	-0.246802	-0.241789	0.157435	0.136889	0.403768	0.118942	0.745196	0.461563	0.132219	0.34854	0.333319
BX255923.3	blue	0.256211	-0.0262003	-0.296158	-0.185374	-0.314354	-0.200628	0.0325391	-0.0665058	0.0175027	-0.143994	0.725469	0.289173	0.171774	0.0503391	0.158231
RP11-1396O13.1	blue	0.341966	-0.225346	-0.496922	-0.0682978	-0.254831	-0.216004	0.114248	0.0955521	0.272269	-0.0341495	0.851818	0.358065	0.169486	0.262917	0.23356
VSIG8	blue	0.34038	-0.243426	-0.544004	0.0374706	-0.138234	-0.127592	0.152741	0.212492	0.269677	-0.0807697	0.90077	0.365659	0.234938	0.315506	0.284082
C6orf183	blue	0.213673	-0.0610455	-0.422244	-0.121158	-0.283376	-0.220816	0.0202642	0.0218228	0.161802	-0.0809654	0.907562	0.386166	0.198391	0.165214	0.275575
LINC00880	blue	0.326232	-0.160122	-0.49634	-0.150262	-0.349241	-0.21188	0.0709527	0.0422357	0.173713	-0.134807	0.919759	0.380282	0.192684	0.231481	0.219305
ZNF487	blue	0.336124	-0.198611	-0.576441	-0.0379078	-0.252875	-0.223613	0.120035	0.140265	0.296352	-0.0775174	0.924197	0.409878	0.21768	0.314032	0.310976
WDR65	blue	0.281166	-0.0597363	-0.145823	-0.45684	-0.488171	-0.124364	-0.0258544	-0.169656	-0.0660367	-0.178271	0.840752	0.272745	0.047205	-0.128806	-0.0563501
WDR86-AS1	blue	0.167685	-0.17631	-0.50687	-0.0822444	-0.252533	-0.205769	0.114493	0.112561	0.292437	-0.0104502	0.762752	0.497934	0.148386	0.307559	0.281374
TUBA4B	blue	0.36376	-0.19138	-0.505672	-0.0748343	-0.264397	-0.185463	0.0983432	0.111733	0.250839	-0.0534766	0.922376	0.387154	0.207489	0.287498	0.281687
RP11-298O21.5	blue	0.335406	-0.0290681	-0.325204	-0.172371	-0.348105	-0.243951	-0.0887375	-0.0991296	0.108884	-0.038131	0.831823	0.257634	0.0695259	0.0820005	0.184226
CCDC13	blue	0.36618	-0.262778	-0.36507	-0.173293	-0.219636	-0.00582542	0.211183	0.142002	0.0738295	-0.223082	0.899595	0.395147	0.186273	0.0849036	0.050268
IGFBP7-AS1	blue	0.310071	-0.0816946	-0.527625	-0.0055464	-0.272899	-0.248869	0.0429565	0.0639669	0.134533	-0.151899	0.841615	0.386326	0.299834	0.33517	0.34622
RP11-219B17.1	blue	0.196621	-0.178483	-0.496452	0.128901	-0.0644191	-0.118497	0.122538	0.212096	0.200515	-0.129419	0.754362	0.316057	0.290356	0.3171	0.290109
CRNDE	blue	0.213	0.019099	-0.281306	-0.182857	-0.302036	-0.196726	0.0761627	-0.0635662	-0.155393	-0.39545	0.766067	0.357166	0.400049	0.0215952	0.148877
RP11-179A16.1	blue	0.304196	-0.202332	-0.472482	-0.0822	-0.230978	-0.120773	0.144926	0.148262	0.162648	-0.159599	0.794154	0.435562	0.272249	0.256754	0.219578
RP11-1C1.7	blue	0.28646	-0.203249	-0.447135	-0.0488255	-0.192046	-0.0951166	0.117153	0.150912	0.133568	-0.191056	0.921018	0.381871	0.218753	0.218192	0.18749
RP11-696N14.1	blue	0.300978	-0.172375	-0.647545	0.0452428	-0.238864	-0.271349	0.202841	0.165873	0.392228	0.0345223	0.673064	0.359374	0.217559	0.428581	0.418621
LINC00535	blue	0.218072	-0.219327	-0.249242	-0.147793	-0.15819	0.0300695	0.0980709	0.100764	0.199832	0.0379162	0.711741	0.202518	-0.0821432	0.045198	0.00619129
RASSF8-AS1	blue	0.394625	-0.2275	-0.676638	-0.102356	-0.404832	-0.34575	0.174681	0.0991937	0.55593	0.259934	0.709097	0.50184	0.0947056	0.452466	0.415699
CTC-441N14.2	blue	0.334997	-0.239767	-0.574651	0.0443914	-0.171381	-0.159771	0.122493	0.196936	0.284867	-0.0657582	0.910657	0.414865	0.221212	0.356011	0.315234
CTB-127C13.1	blue	0.307164	-0.246959	-0.399007	-0.102589	-0.224157	-0.0835444	0.156437	0.142219	0.298733	0.0616186	0.764705	0.33669	0.0430037	0.207926	0.179864
DYNLL1-AS1	blue	0.202437	-0.315399	-0.388375	0.193323	0.130609	0.0602745	0.227856	0.320903	0.193869	-0.137355	0.746667	0.227777	0.0725427	0.202644	0.136601
CTC-347C20.2	blue	0.383168	-0.25372	-0.508879	-0.00335432	-0.172655	-0.126126	0.238071	0.198338	0.386125	0.120456	0.698746	0.411978	0.0658046	0.308463	0.256614
RP11-503N18.4	blue	0.308886	-0.16781	-0.461265	-0.124326	-0.314527	-0.162234	0.0828472	0.0634285	0.191131	-0.0807063	0.917462	0.333108	0.132836	0.220396	0.207652
CCDC153	blue	0.342336	-0.250386	-0.56305	-0.0419882	-0.238674	-0.150521	0.194224	0.186832	0.231491	-0.132011	0.945031	0.468094	0.260967	0.334889	0.278323
RP11-377G16.2	blue	0.231124	0.0857439	-0.391595	-0.168665	-0.355	-0.306358	-0.0346861	-0.0866843	0.0553335	-0.175283	0.702695	0.363428	0.334397	0.119647	0.289111
RP11-664D7.4	blue	0.112362	0.0685815	-0.075369	-0.336875	-0.3688	-0.137446	-0.101042	-0.182477	-0.180003	-0.283655	0.744123	0.188367	0.127802	-0.170741	-0.0135257
LINC01088	blue	0.334911	-0.129357	-0.537706	-0.0264734	-0.220472	-0.21175	0.175305	0.141676	0.15593	-0.210082	0.845106	0.512172	0.431772	0.29917	0.355045
SPATS1	blue	0.320208	-0.211821	-0.443215	-0.103332	-0.262859	-0.181833	0.0939209	0.0798595	0.232561	-0.0369841	0.936589	0.38004	0.162164	0.189925	0.212047
CTD-2544H17.1	blue	0.345583	-0.130033	-0.462115	-0.118097	-0.298851	-0.215684	0.0692749	0.0534919	0.183702	-0.103183	0.923715	0.382349	0.231671	0.21862	0.264564
RP11-725M22.1	blue	0.279027	-0.086368	-0.42379	-0.216116	-0.367998	-0.213298	0.0419447	-0.0051857	0.128029	-0.138043	0.920972	0.394939	0.178802	0.149597	0.209439
RP11-506H20.1	blue	0.210566	-0.0415094	-0.165832	-0.142566	-0.18796	-0.0519766	0.0108498	-0.0195254	-0.0405592	-0.206304	0.745437	0.135443	0.0918421	-0.091154	0.0146605
RP11-536I6.1	blue	0.310535	-0.154025	-0.360275	-0.142986	-0.255492	-0.120846	0.0769059	0.0511158	0.113153	-0.123273	0.858434	0.342563	0.15648	0.105749	0.133033
PTX4	blue	0.233473	-0.17782	-0.503005	0.0988778	-0.0911348	-0.14429	0.0428753	0.179791	0.322137	0.0289776	0.80384	0.276582	0.11466	0.309824	0.310607
RP11-863K10.2	blue	0.265002	-0.152674	-0.402406	0.00582354	-0.182348	-0.16928	0.0642372	0.0739892	0.239609	0.0408914	0.698106	0.287923	0.049564	0.180488	0.199185
RP11-409C19.2	blue	0.321749	-0.173697	-0.533051	-0.0156783	-0.21846	-0.232525	0.044482	0.109132	0.336044	0.0427987	0.922444	0.393979	0.121605	0.288101	0.332255
RP11-431D12.1	blue	0.25977	-0.167741	-0.422	-0.109413	-0.240222	-0.146971	0.0949327	0.0854951	0.187788	-0.096434	0.888609	0.354669	0.190321	0.171823	0.190523
RP11-315O6.1	blue	0.317642	-0.303997	-0.555144	0.0443889	-0.14955	-0.123281	0.286029	0.229653	0.305318	-0.0598696	0.720877	0.421938	0.203016	0.35752	0.244356
RP11-167N4.2	blue	0.408958	-0.195471	-0.41287	-0.152154	-0.291713	-0.147184	0.0748559	0.0561578	0.232528	-0.00689282	0.920637	0.321757	0.0596307	0.141107	0.158653
DYX1C1	blue	0.257654	-0.0472949	-0.403468	-0.257689	-0.440781	-0.251808	-0.00600605	-0.0633768	0.165326	-0.0334652	0.833234	0.319279	0.0816061	0.133247	0.220395
ABCC6P1	blue	0.256434	-0.0267994	-0.435798	-0.048665	-0.237758	-0.314662	-0.00591163	-0.0217873	0.149654	-0.0621665	0.724921	0.403768	0.170265	0.192921	0.324941
NHLRC4	blue	0.278661	-0.193611	-0.474768	-0.109219	-0.262352	-0.140803	0.088499	0.111837	0.218668	-0.0717381	0.952137	0.406595	0.159366	0.233821	0.219938
RP11-175P13.3	blue	0.277782	-0.118669	-0.431238	-0.0221095	-0.186791	-0.188689	-0.0125151	0.0691474	0.268402	0.0419061	0.837188	0.262812	0.090648	0.179914	0.266022
RP11-493L12.6	blue	0.340974	-0.201296	-0.463929	-0.105556	-0.274845	-0.156861	0.0702584	0.0870274	0.177751	-0.112865	0.946056	0.393781	0.213661	0.205313	0.206639
RP11-298I3.4	blue	0.362438	-0.33611	-0.499334	-0.052129	-0.225404	-0.121175	0.17656	0.170826	0.326642	0.0303817	0.74722	0.415478	0.121637	0.292401	0.179582
RP11-299L17.3	blue	0.293163	-0.2323	-0.444474	-0.225863	-0.366603	-0.168833	0.123171	0.0519298	0.237564	-0.0400858	0.809706	0.45753	0.100617	0.20309	0.123227
RP11-356K23.2	blue	0.334775	-0.189637	-0.412384	-0.108569	-0.242692	-0.127945	0.0949248	0.0943876	0.180304	-0.102448	0.900449	0.359017	0.145387	0.169122	0.178076
RP11-356K23.1	blue	0.316536	-0.152328	-0.431202	-0.164799	-0.324835	-0.198691	0.0832635	0.0370502	0.18291	-0.0675119	0.922746	0.416935	0.19663	0.194639	0.226212
RNASE4	blue	0.257616	-0.258176	-0.632317	-0.0274773	-0.251599	-0.2316	0.234628	0.211332	0.398129	-0.0437669	0.704523	0.448138	0.270727	0.457017	0.347227
RP11-259K15.2	blue	0.328989	-0.112963	-0.339239	-0.252634	-0.33567	-0.15771	0.208492	0.0110646	-0.0537438	-0.344402	0.725283	0.460458	0.416098	0.0714765	0.112627
RP11-643M14.1	blue	0.269314	-0.29503	-0.520311	0.037844	-0.0890124	-0.0805279	0.14743	0.253356	0.361113	0.0311059	0.751161	0.44685	0.196089	0.330832	0.247091
RP11-253M7.1	blue	0.239174	-0.12621	-0.453029	-0.0899718	-0.275078	-0.182246	0.120313	0.0801107	0.135039	-0.160175	0.873282	0.438247	0.211719	0.216321	0.231152
RP11-661D19.3	blue	0.302435	-0.182519	-0.48476	-0.115944	-0.285262	-0.208518	0.034277	0.0710482	0.272509	-0.00204292	0.932846	0.363506	0.147494	0.228585	0.251838
AC074212.5	blue	0.322098	-0.319274	-0.479896	-0.20092	-0.30919	-0.0377855	0.20383	0.175103	0.331515	0.0174312	0.770914	0.3547	0.0268521	0.262087	0.0978213
RP11-7O14.1	blue	0.356426	-0.181219	-0.398104	-0.154684	-0.294534	-0.142558	0.114149	0.0482956	0.171476	-0.071711	0.922346	0.309196	0.104162	0.129337	0.14234
RP11-109P11.1	blue	0.32755	-0.194694	-0.443438	-0.144792	-0.293266	-0.157412	0.0403124	0.0771768	0.231753	-0.0534942	0.911513	0.316687	0.153032	0.182886	0.191287
RP11-368I7.4	blue	0.332837	-0.221122	-0.450531	-0.171926	-0.292684	-0.106542	0.130842	0.115663	0.185346	-0.0967141	0.93485	0.419082	0.197781	0.19429	0.177848
CTD-2311M21.2	blue	0.128631	-0.218565	-0.455554	0.0461465	-0.145215	-0.139479	0.0293936	0.12758	0.369777	0.141971	0.762227	0.230802	0.0021955	0.276616	0.223008
TCF24	blue	0.312789	-0.109268	-0.605655	0.000536234	-0.253363	-0.309849	0.0315793	0.109	0.371896	0.0470409	0.8702	0.441153	0.265108	0.359821	0.45435
RP11-480G7.1	blue	0.3262	-0.141484	-0.453253	-0.133451	-0.318567	-0.216589	0.0556481	0.0319147	0.180755	-0.0916056	0.933368	0.377127	0.221457	0.211824	0.246191
RP11-424M24.5	blue	0.353629	-0.209277	-0.341652	-0.0752958	-0.15502	-0.103274	0.0784739	0.0849412	0.100413	-0.151206	0.767398	0.298892	0.0962726	0.0991732	0.124183
RP11-473M20.11	blue	0.370507	-0.280568	-0.445704	-0.0795877	-0.200784	-0.0634936	0.176915	0.174371	0.209541	-0.0772833	0.844754	0.40956	0.225724	0.211867	0.157786
LINC00908	blue	0.347925	-0.230057	-0.470084	-0.0753072	-0.239743	-0.186243	0.117773	0.113062	0.328418	0.078312	0.762959	0.421309	0.105717	0.244522	0.230053
WI2-1959D15.1	blue	0.197167	-0.259127	-0.382089	-0.132304	-0.276983	-0.0970687	0.0533088	0.0808023	0.256196	0.0678766	0.748179	0.341565	-0.0180642	0.207991	0.0896865
LRRC37A7P	blue	0.233961	-0.195588	-0.410034	-0.0895464	-0.204974	-0.113024	0.102522	0.117197	0.176728	-0.109764	0.859003	0.333773	0.193568	0.18398	0.186079
RP11-403A21.1	blue	0.284319	-0.206979	-0.602199	-0.165512	-0.37061	-0.229209	0.113477	0.123955	0.404944	0.0701137	0.74555	0.436584	0.0824803	0.406396	0.295324
RP11-666A8.9	blue	0.227549	-0.250227	-0.499357	0.00191922	-0.200021	-0.132387	0.0808964	0.166396	0.29805	-0.0539572	0.805276	0.253247	0.18038	0.319068	0.21584
AC074212.6	blue	0.317978	-0.385647	-0.566705	0.0957739	-0.0373607	-0.00293334	0.203029	0.336161	0.468845	0.109684	0.688154	0.285888	0.00382265	0.401856	0.185044
LINC00907	blue	0.146096	0.0753095	-0.314116	-0.204257	-0.391145	-0.28077	-0.00119105	-0.12607	-0.089309	-0.288735	0.759357	0.415938	0.341262	0.0590286	0.227835
AC016629.8	blue	0.365977	-0.297873	-0.442493	-0.0048348	-0.0637702	0.022388	0.224805	0.258367	0.264816	-0.021226	0.783647	0.300133	0.0613028	0.226781	0.129949
AC117395.1	blue	0.203611	-0.175497	-0.511267	0.21444	-0.016186	-0.127372	0.0809368	0.225437	0.365365	0.0969335	0.74598	0.301282	0.105907	0.336568	0.325024
CTD-2619J13.3	blue	0.313775	-0.171864	-0.334513	-0.20401	-0.282013	-0.126458	-0.00120288	0.0249052	0.177428	-0.039167	0.811043	0.255209	0.0920101	0.0850104	0.106142
RP11-193M21.1	blue	0.279215	-0.104968	-0.476132	-0.0622209	-0.2545	-0.205754	0.0427544	0.0771774	0.146797	-0.1587	0.926148	0.400801	0.22534	0.22671	0.286055
FGF14-AS2	blue	0.263465	-0.19578	-0.648469	-0.0400759	-0.292523	-0.203241	0.299994	0.220869	0.231435	-0.213994	0.704877	0.547208	0.456461	0.465759	0.365025
CTD-2035E11.5	blue	0.310472	-0.236525	-0.562724	0.0344866	-0.170796	-0.199297	0.215627	0.174023	0.301672	-0.0430543	0.855286	0.478511	0.228041	0.298449	0.315982
TPTE2P2	blue	0.334117	-0.0341202	-0.367972	-0.104722	-0.271513	-0.198937	0.0300393	-0.0159394	0.0655285	-0.133483	0.766775	0.272354	0.104451	0.121984	0.184652
CTD-2035E11.4	blue	0.204559	-0.0976827	-0.437131	-0.132568	-0.325262	-0.205159	0.0278531	0.000404102	0.169309	-0.0646306	0.770137	0.28486	0.122821	0.192575	0.205789
C6ORF165	blue	0.33788	-0.114338	-0.458345	-0.0718198	-0.257842	-0.211802	0.0146379	0.0519622	0.1724	-0.0872082	0.93982	0.392831	0.182475	0.20062	0.271899
FGR	brown	0.131674	-0.164291	-0.712855	0.246813	-0.0525784	-0.244439	0.235196	0.302768	0.453817	0.0350911	0.238139	0.371558	0.287811	0.727892	0.503331
CFH	brown	0.0968491	-0.0476815	-0.704989	0.26595	-0.0646305	-0.350342	0.266225	0.247313	0.400194	0.00726229	0.205334	0.460229	0.329502	0.702247	0.614313
LAP3	brown	-0.0885842	-0.151732	-0.594173	0.503368	0.179964	-0.126734	0.172824	0.393249	0.423409	0.0895549	0.0182117	0.239213	0.25433	0.795477	0.493963
TMEM176A	brown	0.165789	-0.457006	-0.672362	0.472644	0.28398	0.039821	0.314618	0.60742	0.694811	0.28287	0.177143	0.287113	0.137369	0.767345	0.420312
PLXND1	brown	0.108852	-0.371768	-0.644813	0.408312	0.215289	-0.0116027	0.274535	0.50785	0.503193	0.145497	0.228641	0.444275	0.21034	0.718664	0.409175
AK2	brown	0.105193	-0.226113	-0.814438	0.413359	0.0854462	-0.196739	0.329211	0.470994	0.455406	-0.0646659	0.25958	0.445643	0.491044	0.865196	0.601634
TNFRSF12A	brown	-0.0747706	-0.28628	-0.548834	0.568835	0.30525	0.0981751	0.233318	0.525286	0.359745	0.00271389	0.0573544	0.0973112	0.205238	0.737742	0.329953
TEAD3	brown	0.0645569	-0.392232	-0.63778	0.402546	0.169864	0.00899076	0.205827	0.508029	0.697923	0.338775	0.0835253	0.103342	-0.0126362	0.814053	0.380746
ST3GAL1	brown	0.0899501	-0.345553	-0.690184	0.580714	0.27241	-0.102942	0.165047	0.488763	0.744949	0.432759	0.110918	0.149792	0.00882249	0.796465	0.520909
ABHD5	brown	0.0436946	-0.11744	-0.681953	0.531355	0.184772	-0.280611	0.0639842	0.348571	0.646848	0.383381	0.0975249	0.238536	0.259798	0.745204	0.713644
PTBP1	brown	0.151905	-0.339495	-0.833928	0.627216	0.310871	-0.0896325	0.221801	0.586448	0.622748	0.150271	0.35791	0.33161	0.216104	0.878294	0.617073
PRICKLE3	brown	0.150605	-0.413006	-0.722024	0.625008	0.345041	-0.00750324	0.210029	0.574271	0.646687	0.229662	0.234548	0.194402	0.104239	0.826156	0.4594
MVP	brown	-0.0748729	-0.410795	-0.567994	0.426872	0.270876	0.186578	0.382601	0.631498	0.399031	-0.103464	0.0394851	0.175141	0.281515	0.793847	0.246097
NUB1	brown	0.224581	-0.229314	-0.841741	0.435662	0.121642	-0.235136	0.341793	0.471593	0.529817	0.0272248	0.498884	0.545895	0.467199	0.752162	0.692334
SLC11A1	brown	-0.00465694	-0.275563	-0.622993	0.216624	-0.0111557	-0.0466158	0.380124	0.433131	0.39987	-0.0681164	0.108136	0.367545	0.461452	0.732784	0.381582
WWTR1	brown	0.128535	-0.035888	-0.803658	0.376272	-0.0825841	-0.413457	-0.0324452	0.216544	0.483255	0.124409	0.462762	0.362279	0.298963	0.7695	0.740087
SAMD4A	brown	0.149634	-0.133019	-0.673061	0.616026	0.284312	-0.225622	0.0757537	0.388038	0.516958	0.244417	0.126054	0.250907	0.201325	0.740063	0.668089
PLEKHB1	brown	0.260646	-0.450365	-0.77132	0.383782	0.158288	-0.0491923	0.513601	0.571452	0.566142	0.0943839	0.337474	0.583902	0.449834	0.740506	0.501662
SERPINB1	brown	0.00254185	-0.171818	-0.703017	0.222967	-0.10765	-0.192757	0.215343	0.339447	0.371244	-0.0954907	0.213961	0.329681	0.46685	0.791265	0.480917
RTFDC1	brown	0.166586	-0.44877	-0.629286	0.436182	0.23878	0.134513	0.516873	0.618063	0.515732	0.0826759	0.229046	0.349618	0.225642	0.70666	0.304763
DERA	brown	0.176686	-0.13218	-0.79272	0.0967754	-0.25707	-0.385273	0.206029	0.241934	0.528445	0.0958983	0.407094	0.588536	0.527778	0.731178	0.64967
EHD2	brown	0.110093	-0.508438	-0.647911	0.496284	0.29805	0.0243161	0.265375	0.571442	0.762585	0.41869	0.163311	0.233317	0.00624977	0.784338	0.392816
VIM	brown	0.127994	-0.384375	-0.73669	0.422261	0.125609	-0.0943401	0.235309	0.486386	0.696471	0.285277	0.326979	0.222576	0.0411084	0.774371	0.459121
CD44	brown	-0.0258098	-0.234996	-0.600715	0.45881	0.187822	-0.040668	0.204276	0.440725	0.28011	-0.148657	0.217557	0.255893	0.355805	0.743604	0.409035
TNFRSF1B	brown	0.110099	-0.400985	-0.664785	0.0712535	-0.148552	-0.0637014	0.409983	0.401493	0.459053	0.0308645	0.302903	0.590597	0.303197	0.707453	0.325406
LCP2	brown	0.0168576	-0.135046	-0.620633	0.240368	-0.0793234	-0.253323	0.221011	0.248903	0.315645	-0.00240253	0.11803	0.554879	0.342655	0.708972	0.493264
WWC3	brown	0.210527	-0.150443	-0.780811	0.614129	0.265953	-0.302265	0.157191	0.401987	0.555746	0.208434	0.311302	0.402143	0.40279	0.719594	0.7535
MAP4	brown	0.0978993	-0.25807	-0.763453	0.4734	0.189818	-0.1641	0.368399	0.492283	0.529943	0.0943951	0.266996	0.434252	0.39101	0.767239	0.621128
HOMER3	brown	0.207923	-0.47428	-0.716315	0.597528	0.391596	0.143392	0.417001	0.697552	0.445844	-0.0614296	0.396608	0.402934	0.295374	0.747865	0.375752
CYBA	brown	0.140847	-0.483169	-0.686221	0.191483	0.0776961	0.13515	0.589482	0.619026	0.461188	-0.0479487	0.327938	0.627189	0.235178	0.743602	0.27737
HEBP2	brown	0.132449	-0.385083	-0.835542	0.661243	0.321433	-0.0881048	0.330193	0.615815	0.682035	0.174542	0.303353	0.302545	0.19808	0.900068	0.591622
SZRD1	brown	0.247405	-0.427912	-0.844085	0.344564	0.0831051	-0.0811875	0.411348	0.566886	0.735041	0.260017	0.420632	0.498907	0.158777	0.843954	0.550617
FAM114A2	brown	-0.0224399	-0.0616695	-0.741632	0.42193	0.0167084	-0.343308	0.0422362	0.296432	0.615154	0.251134	0.272473	0.288856	0.224695	0.743498	0.67863
TRAF3IP2	brown	0.0463186	-0.423375	-0.57972	0.361616	0.159894	0.0662512	0.261914	0.511772	0.685947	0.353386	0.0536047	0.0789547	-0.0457723	0.758892	0.321946
SEC61A1	brown	0.00837478	-0.419596	-0.650882	0.558277	0.322266	0.0710672	0.238482	0.602413	0.679658	0.295024	0.0449618	0.114366	0.0193271	0.852206	0.38195
PARP12	brown	0.0826039	-0.223352	-0.699649	0.278035	-0.035525	-0.147878	0.230535	0.356859	0.331733	-0.109985	0.428898	0.427981	0.267575	0.724032	0.442924
YBX3	brown	0.0586053	-0.302097	-0.683969	0.516201	0.208456	-0.0432656	0.244313	0.512144	0.542847	0.10708	0.0655261	0.098131	0.212295	0.869373	0.467751
GNA15	brown	0.109639	-0.344847	-0.630994	0.39959	0.179049	-0.00532078	0.36276	0.496202	0.378147	-0.0015395	0.215199	0.625047	0.294842	0.711863	0.394077
HDAC7	brown	0.0329121	-0.479802	-0.550665	0.59705	0.440516	0.210807	0.279255	0.647954	0.554162	0.16912	0.0315471	0.0248896	-0.0400868	0.769376	0.242539
SBNO2	brown	-0.0748901	-0.330464	-0.569595	0.654145	0.430621	0.141718	0.26227	0.62394	0.423982	0.0233472	-0.0689998	0.0566795	0.232105	0.819539	0.368744
HMG20B	brown	0.228756	-0.508418	-0.801422	0.525065	0.32678	0.0868194	0.451847	0.708247	0.535449	-0.0167	0.468287	0.543938	0.306635	0.781023	0.440344
GNAI3	brown	0.0879134	-0.135279	-0.779732	0.477669	0.0519411	-0.331494	0.0673581	0.336296	0.682813	0.3183	0.238942	0.24252	0.271928	0.826567	0.704259
TRAM2	brown	0.000453449	-0.104139	-0.652043	0.637818	0.27863	-0.245251	0.123923	0.353947	0.457125	0.144545	0.109543	0.227769	0.184713	0.72196	0.608123
YBX1	brown	0.112078	-0.312475	-0.835667	0.598645	0.281369	-0.0853416	0.456344	0.616757	0.511655	-0.000287005	0.262252	0.532503	0.426377	0.896806	0.640051
SPI1	brown	0.146795	-0.461634	-0.653428	0.178895	0.0690737	0.0994879	0.561892	0.571322	0.392435	-0.0736308	0.213263	0.737235	0.35885	0.714845	0.308364
SP100	brown	0.119683	-0.100991	-0.789231	0.269243	-0.127781	-0.338675	0.178692	0.266009	0.387932	-0.0374372	0.419807	0.593019	0.365954	0.788291	0.624704
KLF6	brown	0.0180866	-0.195237	-0.675633	0.512684	0.136582	-0.158369	0.0906989	0.36827	0.455447	0.0825181	0.316783	0.211572	0.230188	0.734917	0.528849
TNFRSF1A	brown	0.0580082	-0.428127	-0.681079	0.613041	0.370697	0.0770776	0.329349	0.654429	0.660835	0.228514	0.01998	0.166552	0.109057	0.891203	0.431906
RHOA	brown	0.0917872	-0.230781	-0.842022	0.322445	-0.0585035	-0.27031	0.274401	0.393674	0.615346	0.145637	0.379342	0.465002	0.43027	0.847355	0.628895
CBFB	brown	0.105581	-0.0112969	-0.809028	0.53591	0.112243	-0.379267	0.128564	0.343105	0.492943	0.0648819	0.21842	0.30234	0.540742	0.7891	0.803873
IFI35	brown	0.0845118	-0.467946	-0.677875	0.335348	0.14497	0.0832747	0.422136	0.58737	0.470887	-0.0279463	0.312519	0.41151	0.240547	0.800352	0.322312
BCL3	brown	0.0551158	-0.418283	-0.643724	0.488234	0.226979	0.0379505	0.332466	0.555764	0.541437	0.113105	0.073775	0.161972	0.260938	0.826382	0.360181
WDR1	brown	0.00873034	-0.48637	-0.675184	0.459267	0.214402	0.0945347	0.333552	0.611085	0.638332	0.17726	0.167857	0.207426	0.152961	0.866556	0.33673
HSD17B10	brown	0.122042	-0.648919	-0.581603	0.400615	0.32157	0.340989	0.60952	0.758962	0.520289	0.0247046	0.211493	0.275959	0.119456	0.731595	0.127574
KDM5A	brown	0.0778056	0.014978	-0.711197	0.559655	0.127264	-0.399287	0.0321104	0.243734	0.455643	0.163796	0.239541	0.338307	0.341928	0.695944	0.771305
TEAD2	brown	0.236402	-0.326254	-0.812397	0.347047	0.0484567	-0.182723	0.252012	0.446626	0.574978	0.113006	0.42817	0.477612	0.177434	0.808013	0.549449
TTC38	brown	0.15128	-0.453484	-0.768036	0.3845	0.145263	-0.0233437	0.280429	0.566602	0.773485	0.341406	0.289408	0.360752	0.0704371	0.830601	0.462603
FNDC3B	brown	0.0698028	-0.0903452	-0.732937	0.55228	0.123644	-0.32077	0.0053053	0.314757	0.647105	0.37741	0.132185	0.191703	0.153619	0.806299	0.71198
REXO2	brown	-0.0527948	-0.183076	-0.656202	0.494728	0.263107	-0.07334	0.303871	0.496873	0.28518	-0.169963	0.125481	0.401552	0.524102	0.714709	0.503823
RBMS2	brown	0.0886946	-0.0829435	-0.695788	0.510933	0.157637	-0.286435	0.0681158	0.324448	0.58676	0.278477	0.133772	0.2605	0.192036	0.727679	0.676501
NFKB2	brown	0.0194281	-0.424294	-0.655178	0.711039	0.421571	0.0948256	0.268511	0.641059	0.581683	0.160575	0.0610801	0.0605293	0.132423	0.860367	0.39388
IL4R	brown	0.0647995	-0.336495	-0.690411	0.32854	0.0880973	-0.0283072	0.388196	0.507853	0.525783	0.04121	0.136017	0.29157	0.260888	0.81145	0.398774
FGFR1	brown	0.141567	-0.480731	-0.7128	0.721554	0.441428	0.0324758	0.240296	0.643887	0.771372	0.381847	0.230177	0.126177	0.0387569	0.819716	0.474925
ARAF	brown	0.0864845	-0.45768	-0.733854	0.521139	0.308427	0.0116569	0.399722	0.630167	0.735493	0.322473	0.110052	0.360819	0.228535	0.829541	0.479951
DNM2	brown	0.124862	-0.345766	-0.706366	0.546291	0.345262	0.0436429	0.340149	0.618456	0.318424	-0.212269	0.306846	0.423313	0.593869	0.743277	0.477888
GSTP1	brown	0.133952	-0.669575	-0.717216	0.482494	0.344665	0.285281	0.639072	0.819512	0.660364	0.118152	0.316166	0.392235	0.128763	0.814202	0.268266
CD59	brown	-0.0993929	-0.29377	-0.559123	0.44714	0.203873	-0.0132897	0.194104	0.460599	0.663358	0.362503	-0.086801	0.0742457	-0.0276823	0.772892	0.366014
CD82	brown	0.00978739	-0.317313	-0.598632	0.518157	0.319064	0.0503617	0.349756	0.562536	0.328669	-0.0943944	0.113036	0.304456	0.495618	0.69676	0.38654
MGST2	brown	0.160341	-0.389435	-0.766704	0.344508	0.0958787	-0.0806245	0.4848	0.530719	0.573	0.0424267	0.365452	0.532536	0.22598	0.761488	0.453195
B4GALT1	brown	0.0868326	-0.281832	-0.760144	0.290177	-0.0829015	-0.196628	0.217252	0.351806	0.532806	0.117919	0.357836	0.380733	0.27774	0.789578	0.494174
ASAP3	brown	0.03508	-0.466869	-0.571302	0.521013	0.331237	0.0699622	0.220013	0.561289	0.763595	0.438224	-0.0265296	0.0602852	-0.0617223	0.773148	0.341266
TGDS	brown	0.13376	-0.0721527	-0.792764	0.408802	-0.00984568	-0.419662	0.00516788	0.256715	0.589639	0.201877	0.314751	0.308193	0.3961	0.724366	0.717633
SLC8B1	brown	0.0775835	-0.508424	-0.616501	0.267116	0.123031	0.156362	0.36183	0.577682	0.601964	0.195804	0.121778	0.333412	0.04496	0.75701	0.230231
RPLP0	brown	0.106854	-0.508461	-0.606026	0.354087	0.218907	0.217172	0.667654	0.66971	0.460104	-0.016695	0.168925	0.297237	0.113126	0.711786	0.231204
PXN	brown	0.102865	-0.330698	-0.759669	0.504023	0.210416	-0.0645117	0.257559	0.545529	0.625151	0.171208	0.162603	0.269865	0.255292	0.884676	0.532848
FXYD5	brown	0.196235	-0.454893	-0.755002	0.260183	0.0652058	0.00829639	0.532475	0.562308	0.484394	-0.0381273	0.428476	0.668375	0.275369	0.756928	0.374558
ICAM1	brown	-0.0656149	-0.272202	-0.495594	0.454194	0.173567	0.0327659	0.173481	0.412705	0.393072	0.072818	0.0122211	0.00600739	0.140798	0.714621	0.284481
FLT3LG	brown	0.152357	-0.540279	-0.677057	0.378444	0.235248	0.139785	0.41772	0.628725	0.479014	0.00753256	0.381165	0.545445	0.167298	0.727839	0.266202
EFNB1	brown	0.107785	-0.470791	-0.631874	0.684426	0.472082	0.119296	0.31125	0.671282	0.683537	0.309437	0.14305	0.170354	0.0213169	0.756984	0.377122
ITGA6	brown	-0.00770851	-0.173218	-0.713037	0.261857	-0.0784318	-0.301301	0.109339	0.282698	0.644064	0.316358	0.198867	0.371644	0.165804	0.790268	0.571074
PSME1	brown	0.143338	-0.407544	-0.701211	0.361739	0.127038	-0.015187	0.463988	0.531593	0.443162	-0.0314874	0.274212	0.467973	0.256763	0.793082	0.384045
SNAP23	brown	0.0800718	-0.0573514	-0.703121	0.696886	0.292189	-0.306124	0.0637776	0.354281	0.563158	0.271589	0.0897471	0.228173	0.31941	0.738527	0.736077
MYL6	brown	0.0813043	-0.639361	-0.566546	0.298122	0.233816	0.320783	0.720244	0.71694	0.350431	-0.188726	0.288482	0.399168	0.262809	0.694798	0.0791116
COMT	brown	0.129309	-0.644133	-0.722943	0.482926	0.327138	0.239169	0.51449	0.781752	0.715264	0.199043	0.389517	0.364298	0.192741	0.796361	0.304081
ABL1	brown	0.19982	-0.315927	-0.79217	0.603381	0.309047	-0.107067	0.275413	0.564586	0.560788	0.130026	0.300198	0.34153	0.39827	0.798739	0.632305
HSD3B7	brown	0.0674896	-0.487004	-0.584115	0.479207	0.374891	0.183572	0.386798	0.67348	0.493519	0.032046	0.0733306	0.244884	0.22355	0.756476	0.288652
BCL7C	brown	0.309543	-0.589049	-0.703811	0.421104	0.291952	0.188188	0.618019	0.713945	0.526101	0.0308476	0.399572	0.414943	0.195173	0.692418	0.305639
MFNG	brown	0.150358	-0.323352	-0.725449	0.184588	-0.00972377	-0.142984	0.369232	0.424649	0.451518	-0.00870071	0.350155	0.708583	0.262431	0.718026	0.456337
LGALS1	brown	0.135153	-0.690831	-0.716222	0.534616	0.375365	0.255648	0.628618	0.809587	0.662219	0.133329	0.26384	0.405311	0.105233	0.842449	0.260221
TRIOBP	brown	0.240388	-0.386191	-0.78397	0.139191	-0.115165	-0.0992562	0.324792	0.43407	0.622871	0.195502	0.528147	0.525449	0.180962	0.760236	0.433802
PACSIN2	brown	0.0515287	-0.229185	-0.694318	0.474376	0.216402	-0.126495	0.283056	0.467275	0.489444	0.0704677	0.209486	0.402399	0.368702	0.728774	0.534393
HMOX1	brown	0.0176402	-0.473413	-0.670206	0.633226	0.392737	0.0985708	0.35579	0.676343	0.594262	0.148114	0.0858371	0.264992	0.249864	0.843599	0.419614
TSPO	brown	0.177987	-0.571	-0.801905	0.409342	0.248048	0.149595	0.567263	0.760816	0.569313	-0.0348406	0.391175	0.564536	0.377726	0.851589	0.386864
ASCC2	brown	0.197212	-0.631491	-0.71128	0.466946	0.318699	0.200425	0.49047	0.735604	0.673435	0.185116	0.183569	0.333016	0.107574	0.83676	0.278255
APOL4	brown	-0.120971	-0.254107	-0.515112	0.487931	0.24999	0.0306686	0.21268	0.473289	0.357577	-0.00191484	-0.0796418	0.106114	0.177191	0.753712	0.339037
APOL1	brown	-0.00316138	-0.241449	-0.596951	0.499913	0.214552	-0.0485726	0.266551	0.454426	0.389572	0.00595084	0.0934504	0.207478	0.176139	0.775919	0.390162
MYH9	brown	-0.0327907	-0.361367	-0.568894	0.494496	0.291449	0.054538	0.240692	0.525808	0.473354	0.110635	0.026767	0.237408	0.117207	0.785288	0.353877
CSF2RB	brown	0.0792657	-0.271082	-0.695393	0.297851	-0.00675848	-0.160816	0.283907	0.392199	0.573554	0.19977	0.176712	0.503379	0.226362	0.795135	0.525007
ABHD4	brown	0.122245	-0.47028	-0.77062	0.506296	0.255647	-0.0106985	0.36727	0.629792	0.792096	0.333014	0.232622	0.257115	0.152872	0.85251	0.500251
KHNYN	brown	0.1984	-0.211931	-0.860301	0.444107	0.0762745	-0.328333	0.167941	0.391106	0.705643	0.316467	0.293203	0.455566	0.338077	0.845418	0.751738
PYGL	brown	0.027635	-0.397741	-0.560376	0.314077	0.12912	0.030714	0.310955	0.492807	0.625923	0.274432	-0.050407	0.205004	0.116167	0.732182	0.32202
RIN3	brown	0.218581	-0.438926	-0.769478	0.23643	0.0280999	-0.0361272	0.481767	0.534006	0.541403	0.0450264	0.377199	0.676804	0.364576	0.75724	0.442792
DHRS7	brown	0.100815	-0.369654	-0.636801	0.429183	0.163585	-0.0359959	0.377629	0.506307	0.694742	0.331915	0.0811762	0.26263	0.128644	0.750449	0.404498
KIAA0247	brown	-0.0616708	-0.042189	-0.678822	0.491483	0.119396	-0.230364	0.0699459	0.329497	0.376636	0.0392009	0.193458	0.307707	0.332731	0.767468	0.622637
TM9SF1	brown	0.129741	-0.460563	-0.764999	0.460002	0.227391	-0.00543897	0.238849	0.577603	0.685832	0.239381	0.498768	0.337223	0.0923192	0.797136	0.446083
CD40	brown	0.135548	-0.474505	-0.649615	0.412347	0.230045	0.04464	0.3544	0.558475	0.626693	0.234894	0.139738	0.346054	0.0544088	0.745139	0.318592
CTSZ	brown	0.0707039	-0.489119	-0.650688	0.431159	0.253837	0.138423	0.492862	0.636756	0.398475	-0.0835532	0.301193	0.567208	0.241714	0.752827	0.282216
MAPRE1	brown	0.127328	-0.18665	-0.835461	0.317721	-0.0976804	-0.326971	0.167125	0.332166	0.720168	0.338496	0.309583	0.405746	0.297932	0.850876	0.701317
MYL12A	brown	0.0748686	-0.186636	-0.804647	0.270103	-0.0937562	-0.252856	0.316426	0.369925	0.454182	-0.0524431	0.335751	0.46495	0.388303	0.846702	0.566254
PLP2	brown	0.123806	-0.413094	-0.814932	0.340221	0.0472199	-0.0713424	0.363849	0.525334	0.531773	-0.0216037	0.528501	0.387728	0.233858	0.82885	0.441554
ELF4	brown	0.225819	-0.177555	-0.814602	0.209758	-0.150994	-0.342062	0.249163	0.268402	0.384471	-0.0475089	0.540321	0.659949	0.46053	0.703803	0.594257
MAGT1	brown	0.0387356	-0.0339755	-0.763026	0.444647	0.0170241	-0.400579	0.0467989	0.282607	0.560023	0.207506	0.1773	0.315659	0.500818	0.794823	0.765387
TIMP1	brown	0.0367604	-0.496869	-0.718482	0.498886	0.257762	0.100929	0.431994	0.663094	0.586718	0.110303	0.142777	0.293846	0.170087	0.903373	0.368031
PARP4	brown	0.171661	-0.0713841	-0.822488	0.224463	-0.15032	-0.420026	0.128343	0.260391	0.558273	0.143862	0.405674	0.554613	0.505599	0.747883	0.765072
COTL1	brown	0.105807	-0.508838	-0.729423	0.346859	0.115329	0.0414821	0.435184	0.594196	0.672617	0.214737	0.229345	0.511511	0.210621	0.833919	0.387108
EHD4	brown	0.0611562	-0.217725	-0.68663	0.287636	-0.0341406	-0.191273	0.202564	0.338462	0.51137	0.185631	0.1703	0.379208	0.284781	0.770028	0.504984
RIPK2	brown	0.0726643	-0.117193	-0.763667	0.516704	0.0734291	-0.289054	0.136907	0.336091	0.398987	-0.0477838	0.48102	0.305615	0.473446	0.702419	0.639354
STK3	brown	0.0701307	-0.0586633	-0.807282	0.533796	0.120285	-0.354842	0.103356	0.36033	0.519933	0.0922199	0.25223	0.358416	0.472508	0.828808	0.778715
GSDMD	brown	0.204661	-0.543445	-0.75185	0.31396	0.137917	0.0856137	0.453107	0.615585	0.559283	0.0506988	0.490968	0.529419	0.119029	0.768301	0.300669
SH2D4A	brown	0.0904156	-0.343845	-0.67411	0.636061	0.365174	-0.0396701	0.279237	0.545351	0.577472	0.177645	0.220521	0.241344	0.181749	0.724511	0.511247
TNFRSF10A	brown	-0.0186575	-0.201968	-0.667795	0.542125	0.212096	-0.132234	0.186569	0.420649	0.435234	0.0566722	0.223526	0.27285	0.266103	0.747743	0.520348
ARHGEF10	brown	0.0442157	-0.177218	-0.737062	0.5271	0.21329	-0.21708	0.139769	0.442447	0.496281	0.0496207	0.254659	0.395296	0.508855	0.760597	0.675311
SYDE1	brown	0.179976	-0.432255	-0.786813	0.501151	0.248045	-0.0488092	0.256723	0.57608	0.660945	0.21803	0.384964	0.399685	0.0920401	0.843942	0.512488
SLC1A5	brown	0.0110612	-0.400873	-0.624335	0.422111	0.273855	0.118002	0.400398	0.622457	0.496676	0.0213276	0.0782871	0.406605	0.259036	0.787043	0.354725
CCDC9	brown	0.0354897	-0.525755	-0.5702	0.706201	0.537292	0.302595	0.362189	0.754625	0.45886	0.00842459	0.12518	0.076622	0.163885	0.779963	0.251634
HNRNPUL1	brown	0.103137	-0.416158	-0.730143	0.365351	0.112353	-0.0194729	0.361833	0.535505	0.66825	0.238525	0.346385	0.398405	0.273313	0.764023	0.479638
TGFB1	brown	0.201081	-0.449725	-0.785124	0.255173	0.0493585	-0.0165756	0.410133	0.556431	0.630477	0.188649	0.337028	0.661139	0.227023	0.829025	0.454302
PLIN3	brown	0.0983001	-0.387769	-0.674255	0.41443	0.237064	0.0804493	0.35709	0.612501	0.423417	-0.088846	0.253138	0.356991	0.510834	0.753745	0.412838
RASIP1	brown	-0.0297643	-0.327405	-0.565352	0.642558	0.40348	0.103127	0.233839	0.561138	0.368087	-0.0296283	0.133832	0.124922	0.156289	0.723772	0.313444
PLEKHA4	brown	0.126456	-0.4262	-0.744232	0.373961	0.118414	0.0130504	0.353291	0.555937	0.427705	-0.0806592	0.427463	0.447711	0.274687	0.812688	0.381346
CADM4	brown	0.160766	-0.44201	-0.650964	0.463269	0.290441	0.126635	0.386166	0.633284	0.449998	0.0215899	0.227759	0.388606	0.408304	0.757983	0.383845
ZC3HAV1	brown	0.0777195	-0.27038	-0.711869	0.705997	0.336905	-0.151542	0.138527	0.491082	0.70946	0.380544	0.0977807	0.156358	0.0747635	0.835161	0.604515
NOD1	brown	-0.0833691	-0.288687	-0.529707	0.382178	0.17518	0.0393938	0.133452	0.442336	0.467915	0.140921	0.0657337	0.154334	-0.0185557	0.727438	0.318505
SNX8	brown	0.189993	-0.410473	-0.714625	0.400357	0.207505	-0.0093506	0.389528	0.566874	0.537152	0.122794	0.297207	0.565766	0.323783	0.727162	0.479788
TMEM176B	brown	0.195813	-0.517551	-0.651356	0.414699	0.257901	0.0896653	0.378702	0.6249	0.71449	0.305004	0.158143	0.33864	0.102111	0.779912	0.360406
GLIS3	brown	0.08684	-0.271835	-0.762232	0.599479	0.234809	-0.141047	0.110685	0.481974	0.666516	0.257063	0.384326	0.144452	0.145229	0.810336	0.592119
PDLIM1	brown	0.0504289	-0.33728	-0.728364	0.346685	0.0389331	-0.100865	0.292017	0.453836	0.512885	0.0626	0.259942	0.325273	0.293053	0.848954	0.441695
MAP3K8	brown	0.130127	-0.136861	-0.782886	0.106645	-0.258275	-0.337164	0.232372	0.23691	0.556314	0.121735	0.477524	0.513694	0.317031	0.701587	0.581349
PFN1	brown	-0.060434	-0.548201	-0.52468	0.453222	0.365309	0.350398	0.576733	0.733626	0.34578	-0.124524	0.0686987	0.308543	0.205499	0.747181	0.119509
ICAM2	brown	0.00489432	-0.219009	-0.652321	0.347634	0.061834	-0.0928104	0.301127	0.421966	0.44337	0.0143388	0.175298	0.32645	0.254835	0.770095	0.432696
LGALS3BP	brown	0.046761	-0.443075	-0.655041	0.497748	0.311618	0.0812807	0.30748	0.616485	0.411745	-0.0850058	0.231126	0.320895	0.490376	0.770249	0.364267
ABI3	brown	0.153232	-0.327377	-0.711753	0.128035	-0.0397866	-0.095441	0.437441	0.444972	0.405128	-0.0744448	0.286803	0.782966	0.419785	0.718867	0.421738
PMP22	brown	-0.0266899	-0.18011	-0.63255	0.434082	0.135804	-0.142037	0.177001	0.410101	0.369317	-0.0476906	0.0619628	0.263069	0.61387	0.742597	0.517045
UGDH	brown	0.0494344	-0.0345055	-0.694752	0.573268	0.14928	-0.361667	0.00984333	0.263909	0.496223	0.225348	0.16518	0.240345	0.233475	0.732453	0.716539
SLC15A3	brown	0.23775	-0.480595	-0.6992	0.301312	0.100325	-0.00182516	0.402042	0.50923	0.498326	0.0992794	0.418254	0.596454	0.125658	0.704701	0.327011
TCIRG1	brown	-0.00258084	-0.420229	-0.648434	0.313708	0.184806	0.116525	0.452391	0.576672	0.332306	-0.156181	0.313633	0.589604	0.273759	0.712777	0.28894
HPS5	brown	0.0315697	-0.0407305	-0.736381	0.359494	-0.0272971	-0.365433	0.0565742	0.265017	0.541502	0.192637	0.170994	0.32228	0.438986	0.745906	0.716449
CLEC2B	brown	0.0570676	-0.237938	-0.773358	0.579449	0.221352	-0.150788	0.321548	0.5089	0.491921	0.0111319	0.204944	0.361191	0.324958	0.859511	0.594586
TENC1	brown	0.0622009	-0.212945	-0.693353	0.308601	0.0588028	-0.176771	0.304513	0.374346	0.356599	-0.089125	0.206184	0.392358	0.401426	0.706345	0.494969
METAP2	brown	0.0580354	-0.0150914	-0.718067	0.363411	-0.0334922	-0.386038	0.0938463	0.239199	0.506257	0.203725	0.133829	0.336815	0.383689	0.742975	0.694596
ELK3	brown	0.0190799	-0.0239872	-0.712794	0.252739	-0.158535	-0.386411	0.0180118	0.167359	0.45946	0.164246	0.339902	0.445736	0.198134	0.727458	0.635116
LTBR	brown	0.00698098	-0.411367	-0.73061	0.407879	0.162406	-0.00219291	0.334251	0.56903	0.663344	0.21427	0.134676	0.373862	0.162861	0.889043	0.440885
LPCAT3	brown	0.0843436	-0.147392	-0.675885	0.164377	-0.117928	-0.236152	0.0698469	0.254829	0.613218	0.31035	0.162438	0.214642	0.116279	0.736531	0.516261
DSE	brown	0.0760608	-0.0489551	-0.790761	0.27842	-0.154221	-0.453522	0.0430204	0.186161	0.550809	0.200438	0.369901	0.458362	0.283729	0.760465	0.7214
TRIM38	brown	0.11243	-0.084243	-0.733883	0.132564	-0.250095	-0.395745	0.217659	0.160426	0.431386	0.0903133	0.34579	0.659532	0.310161	0.686054	0.596863
ARRDC3	brown	-0.0262152	-0.103117	-0.600254	0.565995	0.210085	-0.17253	0.139871	0.372498	0.431995	0.0814174	0.029626	0.0773414	0.313809	0.717709	0.55703
SLC12A7	brown	0.143336	-0.246058	-0.674601	0.488373	0.178518	-0.188168	0.184562	0.373434	0.519397	0.203737	0.292629	0.375256	0.113599	0.709444	0.552639
ATP6V0E1	brown	0.191098	-0.495599	-0.799845	0.444939	0.194012	-0.0426085	0.415336	0.617345	0.818366	0.337333	0.258749	0.391919	0.165094	0.856872	0.49132
BCL6	brown	0.0488492	-0.371827	-0.55513	0.594664	0.42469	0.0887244	0.303864	0.603392	0.587832	0.206548	-0.0981963	0.0023791	0.141887	0.740318	0.381392
PFKFB4	brown	0.103895	-0.397126	-0.687152	0.327484	0.121722	-0.0545161	0.25908	0.475766	0.50764	0.091117	0.280025	0.345314	0.34021	0.728929	0.394824
MAPKAPK3	brown	0.244146	-0.385345	-0.741711	0.206039	-0.076501	-0.210348	0.219576	0.354513	0.697318	0.374275	0.329892	0.533336	0.112999	0.752032	0.489865
STEAP3	brown	0.0236197	-0.314962	-0.60507	0.325182	0.134555	-0.0372102	0.268059	0.447393	0.306521	-0.095074	0.233461	0.530864	0.279525	0.703032	0.368658
IFIH1	brown	0.113887	-0.0432903	-0.71288	0.409491	0.0245508	-0.353475	0.118368	0.25561	0.359097	0.0156524	0.378818	0.452725	0.366154	0.706215	0.661326
DOK1	brown	0.267703	-0.538803	-0.794585	0.41512	0.238024	0.00447063	0.437361	0.651471	0.723216	0.238169	0.348545	0.607512	0.208564	0.801686	0.464875
IL1R1	brown	0.0130794	-0.220719	-0.680827	0.406122	0.0985192	-0.118606	0.253867	0.439339	0.485815	0.0722585	0.0642199	0.256762	0.271848	0.843603	0.503331
ODC1	brown	-0.0592521	-0.296299	-0.61121	0.57558	0.253048	-0.0406652	0.18329	0.465501	0.620459	0.28909	0.216098	0.0312114	-0.0353515	0.722688	0.414463
NFE2L2	brown	0.0857951	-0.187974	-0.764512	0.674026	0.31229	-0.251088	0.120665	0.470154	0.668256	0.292487	0.128546	0.261168	0.337172	0.822889	0.735276
PRRX1	brown	0.144294	-0.1563	-0.632079	0.389966	0.0404728	-0.330165	0.0332097	0.232986	0.687882	0.502714	0.0740425	0.227843	0.0688654	0.709975	0.611564
HDAC1	brown	0.271102	-0.393074	-0.897924	0.5176	0.183914	-0.198799	0.332085	0.543748	0.796653	0.334051	0.394163	0.453736	0.233624	0.863996	0.658264
GBP3	brown	0.0377822	-0.321979	-0.657462	0.519191	0.258907	-0.00862065	0.270956	0.515077	0.451105	0.0190855	0.281603	0.319129	0.146883	0.738094	0.407443
GBP1	brown	0.00870524	-0.173173	-0.596404	0.427221	0.0994941	-0.132173	0.166236	0.35319	0.303952	-0.0593611	0.220415	0.215409	0.270516	0.729691	0.447522
ECE1	brown	0.0683427	-0.427431	-0.669131	0.279946	0.104865	0.0449096	0.353437	0.545034	0.60337	0.140727	0.184669	0.302025	0.125915	0.777005	0.341918
CNN3	brown	0.0482602	-0.39225	-0.645071	0.471212	0.186357	-0.0477878	0.184268	0.491098	0.783332	0.460207	0.063096	0.109978	-0.00962949	0.824913	0.442801
RAB32	brown	0.153644	-0.250368	-0.798278	0.4169	0.108753	-0.192849	0.349496	0.457823	0.448973	-0.0314231	0.389257	0.648292	0.382679	0.76033	0.574365
VAMP8	brown	0.134963	-0.407147	-0.694938	0.149192	-0.0271793	-0.0623252	0.50878	0.471588	0.39487	-0.0982132	0.366488	0.784254	0.378159	0.697095	0.35358
C1orf198	brown	0.127829	-0.134531	-0.844978	0.324181	-0.074702	-0.34086	0.175184	0.339025	0.548611	0.0746459	0.424871	0.376732	0.557155	0.794531	0.714907
CTNNAL1	brown	0.109306	-0.13691	-0.710887	0.362413	-0.0263534	-0.28357	0.157986	0.294175	0.548981	0.19191	0.249954	0.203009	0.182519	0.746226	0.580867
NPC2	brown	0.223572	-0.528749	-0.775514	0.218135	0.0373942	0.00923735	0.532901	0.596192	0.571549	0.00838012	0.455195	0.655572	0.399222	0.755816	0.370984
ZNF410	brown	-0.0174953	-0.106636	-0.642989	0.734045	0.38222	-0.188832	0.0583214	0.417865	0.519333	0.200043	0.0665435	0.0205495	0.233741	0.738507	0.631878
PLEKHG1	brown	0.121228	-0.208094	-0.745588	0.580619	0.181683	-0.218771	0.0775897	0.403784	0.725155	0.395157	0.230021	0.126687	0.0794343	0.804408	0.631885
TNFRSF10B	brown	0.0994831	-0.367541	-0.773022	0.445554	0.11523	-0.0745656	0.221783	0.492958	0.587969	0.124723	0.447301	0.320072	0.17024	0.817747	0.463659
SORBS3	brown	0.257057	-0.577417	-0.806737	0.412474	0.203987	0.041089	0.42865	0.650651	0.798041	0.311063	0.37549	0.398199	0.0613862	0.833152	0.418185
PDLIM2	brown	0.23166	-0.57562	-0.68008	0.278464	0.16236	0.161657	0.509705	0.653813	0.584353	0.0809355	0.401207	0.494565	0.0813394	0.732495	0.27086
KCNJ8	brown	0.0815762	-0.356793	-0.692971	0.343405	0.0403677	-0.147951	0.197843	0.401676	0.62199	0.26599	0.258561	0.364959	0.0954523	0.782384	0.466821
RAMP3	brown	0.201639	-0.327634	-0.699851	0.190087	-0.0334206	-0.0696202	0.386873	0.43585	0.351843	-0.161011	0.46594	0.480217	0.361884	0.717822	0.359951
C7orf49	brown	0.0352199	-0.16324	-0.751869	0.345311	0.0398776	-0.227631	0.215353	0.38193	0.516871	0.112888	0.281488	0.476386	0.479832	0.733421	0.641888
SRGN	brown	0.0716923	-0.177776	-0.731693	0.197866	-0.153935	-0.241546	0.24294	0.305963	0.473712	0.0364202	0.326501	0.437651	0.38948	0.747592	0.530394
CHST3	brown	0.0602434	-0.254651	-0.673298	0.616967	0.360681	-0.0337021	0.279174	0.568121	0.47491	0.0355234	0.0893985	0.168613	0.450243	0.772327	0.536682
ORMDL2	brown	0.0476594	-0.480316	-0.696296	0.322448	0.155325	0.0892334	0.472358	0.617283	0.417602	-0.131222	0.318876	0.477165	0.418959	0.765492	0.317939
CDK2	brown	0.0586834	-0.288952	-0.734258	0.390446	0.0694972	-0.13656	0.242137	0.446442	0.549638	0.0988062	0.136393	0.26883	0.281335	0.860769	0.503882
NMI	brown	0.0291288	-0.18562	-0.739044	0.366484	0.0185194	-0.220974	0.254167	0.388283	0.467646	0.0328342	0.254795	0.438442	0.280369	0.828214	0.569101
ZNFX1	brown	0.138473	-0.198111	-0.68097	0.331424	0.00311777	-0.252508	0.089396	0.280854	0.57007	0.299851	0.28576	0.373473	0.0904052	0.732539	0.564228
RNF114	brown	0.0592811	-0.184439	-0.741788	0.749307	0.388551	-0.18959	0.245711	0.512164	0.502445	0.0746508	0.0981078	0.222074	0.448991	0.801767	0.691226
SERPINB6	brown	0.217129	-0.535478	-0.827488	0.379619	0.138012	-0.0136891	0.449041	0.621781	0.630196	0.052939	0.383835	0.512098	0.292433	0.876926	0.426317
MOCS1	brown	0.20176	-0.486153	-0.68742	0.536806	0.352376	0.0263186	0.315028	0.616875	0.784372	0.420404	0.105387	0.292837	0.0629879	0.785884	0.454272
MED20	brown	0.115479	-0.286214	-0.625281	0.754497	0.465146	-0.0861541	0.114813	0.515708	0.559336	0.21785	0.212138	0.177412	0.198666	0.70635	0.541583
CDKN1A	brown	-0.00457652	-0.435549	-0.527096	0.599612	0.376912	0.177008	0.265493	0.604118	0.494324	0.121316	0.0480783	-0.0414253	0.108515	0.756854	0.264686
MT2A	brown	0.116821	-0.459139	-0.60064	0.355969	0.205916	0.148013	0.427984	0.600824	0.627525	0.220223	0.0420153	0.273635	0.113085	0.745762	0.275771
IRF1	brown	-0.00663605	-0.163561	-0.561787	0.629385	0.286925	-0.0758371	0.121647	0.403251	0.364517	0.0627886	0.0715642	0.0766898	0.192219	0.721146	0.455303
TRIP10	brown	0.0909145	-0.360722	-0.687547	0.57021	0.32616	0.0220713	0.256998	0.577822	0.504213	0.0714388	0.121207	0.249447	0.178427	0.844723	0.452552
VASP	brown	0.0660986	-0.373997	-0.747673	0.422809	0.153171	-0.029588	0.364481	0.557491	0.553496	0.0752617	0.188372	0.35641	0.271134	0.874338	0.459882
CD93	brown	-0.0489331	-0.17085	-0.655853	0.31337	-0.0116028	-0.184404	0.201347	0.338079	0.406002	0.0306052	0.137319	0.377842	0.341886	0.789109	0.476181
RRBP1	brown	-0.0316457	-0.350561	-0.638454	0.571463	0.341764	0.0715608	0.316271	0.611858	0.358589	-0.133122	0.0433685	0.270581	0.533397	0.813729	0.410268
RALY	brown	0.0445471	-0.535235	-0.713226	0.646682	0.468931	0.238863	0.562708	0.813091	0.384774	-0.210123	0.25801	0.402163	0.471617	0.82784	0.354037
IGFLR1	brown	0.00114623	-0.444124	-0.587395	0.25954	0.146099	0.130943	0.431399	0.585927	0.475865	0.0128951	0.084699	0.325511	0.242116	0.740412	0.26159
BCL2L12	brown	0.266051	-0.465939	-0.723348	0.199025	-0.0161026	-0.00056899	0.424893	0.503087	0.523777	0.0219589	0.511081	0.483537	0.229272	0.712039	0.321285
RRAS	brown	0.179172	-0.58063	-0.718749	0.235604	0.0889212	0.106906	0.514179	0.610334	0.588465	0.0628562	0.462985	0.455428	0.104189	0.728892	0.248546
STAT5A	brown	0.12256	-0.368665	-0.766255	0.264656	-0.0127076	-0.0736621	0.321212	0.484617	0.531381	0.0240979	0.358247	0.472161	0.338684	0.826392	0.43531
GLIS2	brown	0.107643	-0.409924	-0.583999	0.523431	0.27665	0.0581211	0.177282	0.502736	0.631591	0.321144	0.166481	0.00251951	-0.140241	0.736788	0.314532
FGFRL1	brown	-0.00653939	-0.468657	-0.53188	0.575661	0.427257	0.150477	0.258743	0.622927	0.706257	0.391631	-0.0521386	0.0673518	-0.0766229	0.753404	0.304879
GNG11	brown	0.0887428	-0.0590777	-0.743434	0.210695	-0.175814	-0.371021	0.218638	0.213392	0.380798	-0.0229266	0.380954	0.517694	0.286397	0.722842	0.587848
PTPN12	brown	0.0294334	0.0958288	-0.744991	0.498726	0.0650534	-0.434632	0.0338074	0.227958	0.401794	0.0746133	0.117462	0.33902	0.364	0.746921	0.78999
A4GALT	brown	0.0169985	-0.323292	-0.644203	0.421434	0.189759	0.0167516	0.295095	0.515075	0.372984	-0.104088	0.195084	0.315763	0.195057	0.787315	0.349102
APOL3	brown	0.0537629	-0.22769	-0.712764	0.388604	0.0619773	-0.175599	0.267524	0.403236	0.428345	-0.00914507	0.248205	0.425593	0.228495	0.808013	0.484821
TPST2	brown	0.139942	-0.320526	-0.708092	0.659725	0.397714	-0.0412189	0.290543	0.567355	0.582395	0.174629	0.313517	0.269092	0.124747	0.709377	0.506868
APOL2	brown	-0.0513167	-0.34182	-0.54931	0.564509	0.352092	0.110274	0.261307	0.568557	0.361331	-0.0328675	-0.00231414	0.163319	0.217327	0.776785	0.33484
RAC2	brown	0.0838913	-0.243468	-0.663903	0.277849	0.0299994	-0.149853	0.295123	0.38267	0.408911	0.0381164	0.147991	0.530462	0.359658	0.731095	0.495804
HAT1	brown	0.0605218	-0.0232835	-0.78887	0.32779	-0.107862	-0.409775	0.0615145	0.234338	0.498728	0.0988138	0.324066	0.367243	0.416936	0.798394	0.713542
KIF1C	brown	0.0341952	-0.176917	-0.701371	0.615483	0.363755	-0.0877978	0.370056	0.540482	0.343665	-0.101494	0.179981	0.344834	0.501249	0.724745	0.614227
DAD1	brown	0.0342178	-0.481098	-0.689127	0.520417	0.295982	0.0724986	0.475808	0.653975	0.572521	0.0820368	0.265167	0.416848	0.320777	0.790636	0.381559
SH3BP4	brown	0.171721	-0.101051	-0.787237	0.440248	0.116238	-0.314423	0.182612	0.373895	0.414617	-0.0431068	0.309373	0.522803	0.609205	0.729968	0.724344
PVRL2	brown	0.0873587	-0.604307	-0.705869	0.532425	0.309282	0.141686	0.368855	0.684807	0.752636	0.315216	0.208237	0.221619	0.00250681	0.875019	0.31658
BST2	brown	0.0490017	-0.410947	-0.694469	0.6066	0.362117	0.0562447	0.388816	0.649376	0.493867	-0.000348306	0.189627	0.308975	0.251975	0.853248	0.421067
ARPC1B	brown	0.107385	-0.426458	-0.791453	0.320574	0.123381	-0.0140385	0.523219	0.605318	0.529757	-0.00425408	0.299546	0.668549	0.304755	0.849944	0.445853
HELZ2	brown	0.0027075	-0.204316	-0.603901	0.481269	0.182406	-0.0336003	0.17782	0.434505	0.34936	-0.0157595	0.145347	0.147246	0.271932	0.775648	0.434979
PPIL4	brown	0.0369903	-0.0883624	-0.738948	0.583307	0.138516	-0.295886	0.0553686	0.341046	0.498758	0.0905697	0.35075	0.159994	0.324266	0.746039	0.668627
GFAP	brown	0.186198	-0.485412	-0.732175	0.265101	0.0853491	0.0205947	0.43886	0.561972	0.542881	0.0144583	0.417031	0.515695	0.308543	0.745434	0.366203
RFTN1	brown	0.119069	-0.174966	-0.765134	0.356314	-0.0368185	-0.266532	0.22975	0.318443	0.365833	-0.0799954	0.487613	0.430133	0.360743	0.754552	0.573474
PDLIM4	brown	0.0369931	-0.481756	-0.671727	0.477559	0.26197	0.159224	0.317035	0.651177	0.529864	0.0461344	0.195035	0.202076	0.186385	0.855722	0.318418
MGAT1	brown	0.0991711	-0.471892	-0.698034	0.588274	0.417332	0.143316	0.472558	0.71551	0.565579	0.0848216	0.173046	0.422544	0.12973	0.795346	0.385785
IL13RA1	brown	0.169407	-0.1265	-0.784892	0.0913893	-0.250955	-0.338	0.239666	0.251928	0.441767	-0.0381498	0.456018	0.633082	0.364525	0.739919	0.57306
VIMP	brown	-0.0689071	-0.195976	-0.656698	0.666228	0.341154	-0.0563972	0.171001	0.51485	0.449632	0.0478331	0.0634956	0.147914	0.308381	0.815365	0.509985
CHSY1	brown	0.0227531	-0.0868671	-0.678985	0.433027	0.0448714	-0.26191	0.100229	0.301536	0.54684	0.214054	0.0441283	0.144964	0.207236	0.787779	0.593197
LGALS3	brown	0.0991831	-0.379567	-0.670149	0.329486	0.0851899	0.00551366	0.393242	0.529235	0.520314	0.0476705	0.16851	0.276966	0.156527	0.795198	0.359079
TRIM21	brown	0.0882867	-0.336205	-0.67965	0.403957	0.162524	-0.0379233	0.334439	0.506675	0.460661	0.0570676	0.203929	0.45732	0.260586	0.804992	0.443823
TRIM5	brown	0.118127	-0.2817	-0.777732	0.528149	0.175786	-0.239101	0.160663	0.430258	0.658646	0.276155	0.193291	0.365918	0.253487	0.862598	0.61679
TRIM22	brown	0.0346462	-0.110015	-0.696546	0.289488	-0.0528595	-0.257878	0.230978	0.305066	0.437485	0.0594915	0.135533	0.400014	0.343022	0.785492	0.563533
ITGB4	brown	0.0696807	-0.512725	-0.631414	0.279088	0.149436	0.15634	0.359646	0.605232	0.631764	0.128167	0.261479	0.204295	0.154678	0.745917	0.239169
H3F3B	brown	0.0454064	-0.130359	-0.699489	0.177363	-0.196781	-0.233303	0.240097	0.273236	0.336976	-0.109408	0.36126	0.345836	0.4813	0.727775	0.493221
TRIM47	brown	0.00241484	-0.459786	-0.540714	0.568097	0.397303	0.134874	0.214775	0.591283	0.525756	0.175815	0.00690835	0.120052	0.0595121	0.775503	0.27624
MORC4	brown	0.142201	-0.127034	-0.827351	0.678829	0.248858	-0.311126	0.142601	0.412078	0.50214	0.0809577	0.389193	0.326629	0.428235	0.772118	0.759098
RARRES3	brown	0.0991475	-0.508828	-0.705979	0.361639	0.186553	0.0961797	0.513951	0.653709	0.543295	0.00289324	0.221991	0.447288	0.300844	0.818179	0.335336
SWAP70	brown	0.213468	-0.166607	-0.894542	0.475502	0.0502568	-0.357182	0.233215	0.395243	0.587044	0.132702	0.392123	0.540722	0.455944	0.853337	0.776703
RBM17	brown	0.0774851	-0.0157235	-0.77744	0.549979	0.166382	-0.303534	0.170794	0.364169	0.4313	0.0304927	0.181115	0.37374	0.417131	0.805806	0.750528
IL15RA	brown	-0.0179621	-0.263817	-0.698294	0.453014	0.15953	-0.0549704	0.317922	0.503548	0.456992	0.016351	0.081982	0.294589	0.284392	0.855399	0.465754
EMP1	brown	0.00631209	-0.406504	-0.60334	0.487814	0.221617	0.0604491	0.206001	0.520057	0.601085	0.227001	0.0945889	0.0404261	0.0859857	0.800026	0.340232
DTNA	brown	0.113934	-0.322979	-0.724823	0.335534	0.0640214	-0.142092	0.21417	0.445269	0.784417	0.431074	0.192976	0.267847	0.0643809	0.795723	0.531549
SLC43A3	brown	0.0955627	-0.253252	-0.601452	0.37879	0.0697502	-0.151145	0.138351	0.311727	0.456184	0.204153	0.15797	0.289579	0.0634257	0.692259	0.418969
COL4A2	brown	-0.101954	-0.284324	-0.520255	0.31329	0.0740749	-0.0253585	0.190686	0.380446	0.420179	0.110629	0.0664084	0.218912	0.0981338	0.720237	0.309916
TRAFD1	brown	0.117172	-0.293983	-0.709297	0.400983	0.182248	-0.0382597	0.365377	0.533998	0.337023	-0.170306	0.257447	0.414985	0.589944	0.750035	0.482374
TES	brown	0.0831994	-0.117722	-0.697045	0.454231	0.0903422	-0.299934	0.0659308	0.285261	0.465991	0.115504	0.192057	0.245337	0.159225	0.736669	0.571824
CD63	brown	0.112514	-0.513855	-0.761151	0.550377	0.287823	0.0871869	0.482619	0.692855	0.605864	0.0986543	0.194122	0.359057	0.237551	0.919786	0.405359
CDK4	brown	0.121248	-0.451535	-0.714445	0.590376	0.372563	0.055315	0.351784	0.639055	0.650318	0.261132	0.21205	0.38722	0.127748	0.807859	0.454728
STX11	brown	0.0573909	-0.21847	-0.687529	0.461535	0.101224	-0.134403	0.206441	0.408082	0.509784	0.122972	0.189706	0.260884	0.29183	0.779426	0.507469
SP110	brown	-0.00700955	-0.243267	-0.727182	0.447223	0.116819	-0.123178	0.295534	0.470813	0.435854	-0.0136612	0.232946	0.428861	0.380721	0.839484	0.539731
TMBIM1	brown	-0.0232527	-0.444358	-0.61357	0.383819	0.208176	0.0830108	0.331339	0.58195	0.632989	0.208384	0.00544655	0.171616	0.12904	0.81772	0.328371
CKAP4	brown	0.0357039	-0.385867	-0.696333	0.443693	0.145857	-0.0498822	0.24389	0.504243	0.645142	0.252477	0.1627	0.22769	0.114078	0.860595	0.419508
DRAM1	brown	0.0714617	-0.168841	-0.77018	0.386107	-0.0225967	-0.310938	0.169803	0.319242	0.569109	0.203299	0.189184	0.341485	0.227546	0.853675	0.620737
PHF11	brown	0.223034	-0.23334	-0.803717	0.18711	-0.164324	-0.280309	0.318154	0.317967	0.420203	-0.0640561	0.448513	0.519614	0.422215	0.742559	0.523234
LCP1	brown	0.0445617	-0.140314	-0.730794	0.310483	-0.0162722	-0.272812	0.297118	0.334009	0.373602	-0.0420421	0.176299	0.642128	0.538313	0.763451	0.610217
KDELR2	brown	0.0199136	-0.0496694	-0.732381	0.445754	0.0450965	-0.304659	0.0944773	0.304128	0.390813	-0.00347151	0.213064	0.306422	0.420004	0.78931	0.630756
CALCOCO2	brown	0.131341	-0.302888	-0.777342	0.473283	0.16587	-0.157085	0.27321	0.501189	0.687905	0.214077	0.245302	0.315926	0.33083	0.810517	0.595833
ACTL6A	brown	0.12683	-0.153372	-0.889563	0.462243	0.0715539	-0.332854	0.232618	0.422936	0.532355	0.0259352	0.473774	0.538146	0.558037	0.820003	0.778141
DNAJC1	brown	0.0712419	-0.332792	-0.82618	0.507663	0.164551	-0.107415	0.309509	0.550305	0.550162	0.021319	0.289845	0.37293	0.369701	0.902474	0.547868
FAM129B	brown	0.179527	-0.538803	-0.754685	0.483925	0.247533	0.065741	0.362463	0.643483	0.715893	0.277714	0.322895	0.333187	0.0338747	0.853832	0.412564
MYC	brown	-0.02543	-0.260053	-0.500345	0.441549	0.188765	0.00778757	0.18759	0.404859	0.422003	0.132969	-0.0406959	0.0802382	0.112376	0.712553	0.314767
TLN1	brown	0.189008	-0.43293	-0.782031	0.493603	0.244886	-0.0728629	0.335709	0.57813	0.705539	0.28186	0.234369	0.472531	0.276757	0.837615	0.563794
PIM1	brown	0.0671772	-0.374447	-0.725765	0.466714	0.170337	-0.0149895	0.281568	0.541953	0.505963	0.00924167	0.346002	0.247678	0.294767	0.835097	0.436849
RIPK1	brown	0.117426	-0.122736	-0.622095	0.312995	-0.00755922	-0.258574	0.131635	0.253936	0.539073	0.269338	0.0195544	0.202193	0.0907953	0.719207	0.519261
NRM	brown	0.274011	-0.411361	-0.781681	0.313121	0.108606	-0.0624005	0.360866	0.53991	0.549527	0.0461232	0.400601	0.530686	0.279211	0.784022	0.464123
LRRC32	brown	0.0381688	-0.291482	-0.640428	0.406789	0.105017	-0.0587264	0.223713	0.430568	0.501748	0.117	0.16637	0.184465	0.154465	0.783439	0.397474
CASP1	brown	0.0964677	-0.244258	-0.742726	0.561232	0.213664	-0.176052	0.352165	0.480986	0.470606	0.0420399	0.216643	0.571675	0.358616	0.803477	0.593276
SQRDL	brown	-0.0422786	-0.326046	-0.737084	0.575377	0.262732	-0.0487111	0.367883	0.579759	0.563192	0.0738818	0.0656435	0.307343	0.296319	0.907713	0.515789
EMILIN1	brown	0.0549702	-0.547143	-0.557579	0.358017	0.228159	0.174697	0.27222	0.583126	0.689523	0.370821	0.0993321	0.174446	-0.146906	0.740146	0.197045
MYOF	brown	0.0872772	-0.151448	-0.776791	0.313053	-0.040225	-0.292427	0.178816	0.306473	0.507486	0.11791	0.482584	0.525237	0.220217	0.755329	0.613445
PLCE1	brown	0.0551206	-0.182232	-0.708602	0.266508	-0.0936174	-0.330386	0.101709	0.242464	0.614861	0.257404	0.353366	0.290558	0.114197	0.716185	0.570594
IDH1	brown	0.140074	-0.221882	-0.667156	0.498823	0.205862	-0.24742	0.12232	0.379892	0.690564	0.421424	0.0545801	0.377587	0.160248	0.707299	0.623063
PARP9	brown	0.0902062	-0.23084	-0.768021	0.365304	0.0203815	-0.241683	0.201058	0.384564	0.591587	0.186952	0.236422	0.400948	0.250026	0.858623	0.59565
SPPL2A	brown	0.036706	-0.0411586	-0.721881	0.445053	0.0394344	-0.335551	-0.0335569	0.266348	0.580925	0.299358	0.215414	0.250523	0.20265	0.782224	0.698667
RGS3	brown	0.142038	-0.394348	-0.809677	0.521612	0.251758	-0.0294014	0.3456	0.625858	0.521898	-0.0371115	0.346845	0.445178	0.437978	0.861453	0.514481
GUCD1	brown	0.231877	-0.337818	-0.72457	0.144224	-0.0949892	-0.186486	0.249237	0.360639	0.713788	0.379229	0.252195	0.432951	0.0705203	0.746289	0.48368
RAB20	brown	0.130543	-0.486874	-0.690744	0.421102	0.174825	0.0839044	0.436076	0.601224	0.581156	0.11114	0.209825	0.282023	0.249666	0.806429	0.351106
TLE3	brown	0.172343	-0.517503	-0.689893	0.661966	0.391073	0.0524738	0.260956	0.627958	0.734402	0.319955	0.291584	0.190722	0.0310136	0.783888	0.42509
BCL2A1	brown	-0.083149	-0.179218	-0.574109	0.402459	0.112805	-0.0776026	0.269999	0.403665	0.289941	-0.120718	-0.00404727	0.243019	0.467611	0.715139	0.416668
PML	brown	-0.0265688	-0.384545	-0.482735	0.651931	0.485709	0.1904	0.215015	0.610483	0.483491	0.170824	-0.111405	-0.0361307	0.050232	0.756376	0.287559
SCAMP2	brown	0.151759	-0.56606	-0.782309	0.582585	0.39461	0.102238	0.453802	0.74945	0.66002	0.122652	0.249046	0.468063	0.311145	0.869464	0.451278
HAPLN3	brown	0.0609625	-0.261932	-0.643659	0.290577	-0.0178309	-0.112929	0.231675	0.353861	0.442607	0.0840221	0.247605	0.282246	0.120064	0.736315	0.376479
SEC11A	brown	0.151147	-0.219472	-0.86803	0.392635	0.00425946	-0.256134	0.374635	0.433181	0.505828	-0.010584	0.523438	0.590102	0.407101	0.804996	0.636182
ARHGAP17	brown	0.170774	-0.220668	-0.720658	0.554138	0.269054	-0.120119	0.22614	0.48405	0.434193	-0.00269028	0.24423	0.33026	0.447264	0.746568	0.588213
NLRC5	brown	0.0202629	-0.206662	-0.651272	0.343176	0.0539738	-0.136025	0.256795	0.376702	0.373492	0.00819436	0.113989	0.395743	0.285724	0.781646	0.482292
CMTM3	brown	0.27688	-0.31361	-0.82038	0.114253	-0.172423	-0.210754	0.384293	0.371041	0.450615	-0.0230845	0.595107	0.720419	0.346812	0.717027	0.506296
SLC16A3	brown	0.0756115	-0.425547	-0.642381	0.268199	0.0712328	0.0576769	0.39094	0.527389	0.4369	-0.0253806	0.212817	0.432754	0.383426	0.755963	0.319017
TRIM65	brown	0.236296	-0.392267	-0.679354	0.271336	0.0988712	-0.0833145	0.256832	0.458581	0.583293	0.178522	0.275131	0.410703	0.244984	0.723916	0.407184
SECTM1	brown	-0.0132097	-0.288005	-0.575475	0.507533	0.267476	0.0401833	0.297148	0.526403	0.370163	-0.0217262	0.00547086	0.15762	0.296168	0.78443	0.385072
WDR45B	brown	0.0265168	-0.104644	-0.668844	0.470677	0.130582	-0.165535	0.194413	0.391207	0.475157	0.132991	0.173484	0.304797	0.28781	0.737662	0.602921
IFITM3	brown	-0.0117432	-0.499269	-0.623731	0.443796	0.274119	0.154785	0.461524	0.661939	0.592691	0.104226	0.0572096	0.219085	0.143192	0.827753	0.287846
EMP3	brown	0.168204	-0.51733	-0.757842	0.429979	0.183877	0.0433144	0.397853	0.6028	0.608073	0.15046	0.316673	0.375802	0.119949	0.839642	0.369345
EPHA2	brown	0.0287243	-0.320745	-0.55863	0.555762	0.291493	-0.00189348	0.163663	0.459672	0.519247	0.214816	0.0312692	0.00445937	0.057016	0.73172	0.355127
EFHD2	brown	0.000592295	-0.450858	-0.594423	0.395682	0.195097	0.126328	0.435988	0.570539	0.373222	-0.0622983	0.183929	0.358019	0.176761	0.760357	0.25384
EVA1B	brown	0.234524	-0.513836	-0.755726	0.345135	0.185647	0.0713686	0.50136	0.626699	0.524824	0.0206086	0.508413	0.532227	0.198354	0.707194	0.370167
MOB3C	brown	0.141691	-0.478203	-0.578751	0.461349	0.365347	0.143823	0.373058	0.629125	0.636095	0.262508	-0.0139255	0.204818	0.0145787	0.742099	0.302705
FCGR2A	brown	0.181835	-0.325575	-0.779866	0.295458	-0.0209433	-0.178653	0.398083	0.442446	0.445786	-0.05443	0.340736	0.700561	0.544812	0.782266	0.533342
HDGF	brown	0.0717397	-0.387334	-0.677904	0.612245	0.384826	0.0633853	0.318599	0.607317	0.52607	0.066386	0.482603	0.217207	0.155094	0.701218	0.417864
ADAMTSL4	brown	0.109087	-0.44662	-0.710435	0.313248	0.0569907	0.00618312	0.277442	0.502289	0.634713	0.161625	0.460061	0.177182	0.0842375	0.749947	0.339714
MCL1	brown	0.00971318	-0.302693	-0.617598	0.651209	0.308857	-0.0596174	0.168759	0.478982	0.642447	0.324689	0.0588995	0.014429	0.11509	0.748161	0.480463
RAB13	brown	0.204198	-0.485977	-0.86103	0.466588	0.15548	-0.0376926	0.432814	0.615874	0.648708	0.0996154	0.378876	0.412452	0.200625	0.920903	0.485199
SNAPIN	brown	0.239426	-0.462807	-0.818872	0.410093	0.167429	-0.0573918	0.436773	0.602612	0.687615	0.180899	0.345376	0.512025	0.231533	0.822558	0.508342
SLC39A1	brown	0.0177124	-0.420978	-0.749647	0.560565	0.292815	0.00955493	0.322679	0.635306	0.6176	0.136901	0.0933963	0.307885	0.261008	0.942736	0.485404
RIT1	brown	0.0909411	-0.161968	-0.761873	0.60895	0.186174	-0.302639	0.0987857	0.368785	0.677175	0.325439	0.256007	0.190579	0.154756	0.797255	0.694547
ITPKB	brown	0.077363	-0.42784	-0.716039	0.444704	0.20682	-0.0307536	0.278246	0.555584	0.769894	0.358629	0.124413	0.211385	0.143725	0.854258	0.468395
SNRPG	brown	0.0817664	-0.521333	-0.561356	0.402243	0.260831	0.218272	0.613553	0.65296	0.458501	0.0215218	0.183097	0.391017	0.110014	0.696945	0.19985
RHBDD1	brown	0.152782	-0.0998757	-0.79317	0.414278	0.0384046	-0.358695	0.08704	0.323035	0.562592	0.159952	0.332629	0.36162	0.490601	0.754826	0.724236
CTDSP1	brown	0.324947	-0.443905	-0.796836	0.0874366	-0.111914	-0.144724	0.414525	0.439116	0.626747	0.172066	0.43111	0.640737	0.22642	0.738476	0.446834
CSRNP1	brown	0.0331161	-0.394052	-0.568392	0.468145	0.210745	0.0833127	0.251578	0.504847	0.491208	0.121072	0.190107	0.0590822	0.13862	0.702241	0.302518
PLA1A	brown	0.101866	-0.2417	-0.70692	0.324422	0.0359714	-0.151089	0.358923	0.41743	0.514806	0.069329	0.206753	0.319069	0.269597	0.772691	0.482499
ADPRH	brown	0.109484	-0.136301	-0.734093	0.134501	-0.222271	-0.351066	0.180857	0.211288	0.407118	0.0169272	0.384231	0.654043	0.330345	0.725226	0.549273
BOC	brown	0.171057	-0.460018	-0.713609	0.441756	0.205043	0.0189833	0.188356	0.546798	0.707903	0.282256	0.460683	0.254295	0.0546977	0.769563	0.405794
OSMR	brown	-0.0247504	-0.156481	-0.646144	0.40424	0.0902597	-0.174421	0.141001	0.377487	0.5146	0.144957	-0.021455	0.171065	0.242488	0.830629	0.528605
TNFAIP8	brown	0.111024	-0.0873578	-0.787068	0.311129	-0.0562992	-0.34547	0.207348	0.292332	0.417814	0.0195933	0.419263	0.567907	0.361652	0.712799	0.662617
TNIP1	brown	0.108795	-0.507548	-0.652899	0.620668	0.47143	0.215034	0.496568	0.740443	0.497097	0.0168556	0.177157	0.303038	0.167936	0.791009	0.332695
PPP1R18	brown	0.11053	-0.431794	-0.749839	0.674053	0.392912	0.00330281	0.371618	0.65156	0.635617	0.207542	0.0770062	0.348875	0.200832	0.9107	0.535586
DYNLT1	brown	0.252145	-0.501029	-0.857499	0.327873	0.0702396	-0.0262564	0.506927	0.60793	0.564192	-0.0357685	0.576743	0.489281	0.324602	0.816052	0.440428
GNA12	brown	0.164964	-0.42927	-0.693551	0.468175	0.257767	-0.00820827	0.327068	0.573797	0.851493	0.53034	0.112998	0.268185	-0.0287185	0.774985	0.489038
DENND2A	brown	0.172146	-0.362368	-0.747891	0.371146	0.132877	-0.120839	0.364478	0.490384	0.55899	0.173925	0.295408	0.552231	0.289393	0.725872	0.549794
MSN	brown	0.0294261	-0.298084	-0.733243	0.529438	0.154124	-0.117166	0.181842	0.462451	0.658019	0.294304	0.215456	0.245528	0.107308	0.867792	0.531264
CXorf36	brown	0.00284953	-0.101644	-0.656269	0.331138	0.0682884	-0.205044	0.248571	0.348	0.334675	-0.0922372	0.146745	0.378733	0.460631	0.701803	0.532813
HMBOX1	brown	0.159745	-0.482627	-0.656797	0.628406	0.47312	0.0875869	0.387605	0.691153	0.662048	0.247299	0.0402239	0.279918	0.130491	0.774376	0.426893
PLIN2	brown	0.0514826	-0.366233	-0.635537	0.43095	0.197709	-0.00013905	0.277939	0.518306	0.652808	0.246743	0.016341	0.126464	0.183855	0.78439	0.402705
ITPRIP	brown	0.019724	-0.374391	-0.75798	0.532564	0.219717	-0.0231038	0.299674	0.571054	0.569123	0.0921927	0.241107	0.322041	0.281906	0.872218	0.49437
SERPING1	brown	0.100892	-0.487816	-0.730729	0.287517	0.0778463	0.0293681	0.423208	0.574152	0.619445	0.100391	0.311798	0.355064	0.191222	0.840906	0.347783
ROM1	brown	0.148989	-0.490217	-0.710149	0.456676	0.298312	0.0957882	0.466874	0.683966	0.615096	0.102835	0.114395	0.367746	0.225944	0.831011	0.385824
EML3	brown	0.0618332	-0.511999	-0.633321	0.186795	0.0447202	0.153019	0.409876	0.568396	0.609074	0.133713	0.187172	0.25046	0.117536	0.756628	0.212966
ESAM	brown	0.00333966	-0.210221	-0.656824	0.464811	0.170411	-0.148091	0.210053	0.400634	0.435598	0.0417559	0.181688	0.317552	0.161275	0.750951	0.460057
LATS2	brown	0.0781872	-0.0985077	-0.789204	0.618096	0.174951	-0.323561	0.0520513	0.353093	0.594295	0.229087	0.319049	0.218558	0.282499	0.779041	0.744895
SEC24D	brown	-0.0159201	-0.0564338	-0.692139	0.396734	-0.0112154	-0.318463	0.0259168	0.252743	0.520783	0.245349	0.0839466	0.215726	0.200768	0.797829	0.642425
HSPB8	brown	0.0636709	-0.438281	-0.70582	0.603346	0.338812	0.0149959	0.249839	0.606325	0.763005	0.327139	0.300181	0.162276	0.0662776	0.791137	0.452451
PLOD2	brown	0.0866988	-0.145735	-0.691228	0.54553	0.165084	-0.280632	-0.057961	0.322219	0.714575	0.449106	0.228483	0.124356	0.0998074	0.736494	0.659883
CMTM7	brown	0.14428	-0.397183	-0.734444	0.236899	0.00931649	-0.0507054	0.499236	0.501886	0.41385	-0.0877353	0.343671	0.756551	0.426877	0.737116	0.409107
FAM105B	brown	-0.00642766	-0.0305442	-0.679284	0.806507	0.411325	-0.239991	0.0483663	0.415089	0.47026	0.151306	0.0869299	0.158446	0.363635	0.732908	0.73373
LY96	brown	0.0988208	-0.214727	-0.712893	0.376101	0.0942737	-0.182355	0.380656	0.433138	0.396893	-0.057966	0.206367	0.592049	0.410893	0.757383	0.544221
GTF3C6	brown	0.149903	-0.465696	-0.599732	0.332592	0.152367	0.0945005	0.484043	0.5616	0.559031	0.14055	0.18518	0.327047	0.0752875	0.707771	0.255258
RHOC	brown	0.132067	-0.619734	-0.71018	0.390637	0.19272	0.155131	0.494943	0.680517	0.7353	0.260101	0.201723	0.286451	0.00728475	0.865119	0.273702
DBI	brown	0.135237	-0.451393	-0.713736	0.463118	0.24932	0.0703535	0.576799	0.646956	0.51676	0.0170074	0.148177	0.439617	0.301808	0.823046	0.385293
UBE2L6	brown	0.0284303	-0.510384	-0.57482	0.552258	0.405007	0.188274	0.443711	0.678725	0.629753	0.250592	0.0198768	0.218342	0.00360109	0.786511	0.283219
ZFAND3	brown	0.137048	-0.511155	-0.726988	0.545757	0.305571	0.0665245	0.306984	0.646627	0.855857	0.488334	0.276492	0.269485	-0.0198775	0.809991	0.460781
RBPMS	brown	0.0354665	-0.320671	-0.679445	0.595071	0.327834	-0.0493981	0.2454	0.546728	0.65083	0.24817	0.0754454	0.189303	0.10935	0.822965	0.520398
NECAP2	brown	0.208043	-0.509947	-0.856412	0.44353	0.162351	-0.0281846	0.397804	0.627638	0.751142	0.223521	0.471558	0.400268	0.149139	0.876273	0.487881
ETS2	brown	-0.0466407	-0.121938	-0.60043	0.361624	0.0580792	-0.169742	0.211225	0.324247	0.413287	0.0678293	0.0313406	0.266248	0.170394	0.732232	0.458659
RER1	brown	-0.0561506	-0.301373	-0.620261	0.572604	0.376465	0.106617	0.309354	0.622813	0.453141	0.0102677	0.104098	0.182734	0.264984	0.746697	0.396829
WASF2	brown	0.100425	-0.334256	-0.79259	0.497377	0.206575	-0.152962	0.293024	0.537955	0.717854	0.26453	0.213812	0.368532	0.33171	0.847947	0.632807
EIF5B	brown	0.214844	-0.377804	-0.704257	0.301316	0.0595083	-0.0562688	0.490783	0.468962	0.334061	-0.130117	0.439022	0.523063	0.297802	0.676252	0.387371
TSPAN33	brown	0.179311	-0.574511	-0.686269	0.430511	0.276615	0.138898	0.445709	0.689699	0.735952	0.268114	0.282217	0.361604	0.104786	0.766352	0.33695
TAGLN2	brown	0.0687533	-0.348488	-0.796114	0.407811	0.0833362	-0.0812732	0.309628	0.523798	0.495151	-0.0447852	0.336939	0.341717	0.30752	0.908981	0.467842
F11R	brown	0.0315122	-0.19061	-0.681051	0.252302	-0.0962458	-0.167936	0.17824	0.314914	0.487089	0.0929339	0.410256	0.215997	0.157733	0.734127	0.427939
C1R	brown	0.00712422	-0.431067	-0.652604	0.478863	0.286685	0.0799604	0.343056	0.620158	0.528119	0.044821	0.0575481	0.254284	0.221836	0.853115	0.356825
SHKBP1	brown	0.046741	-0.36993	-0.713544	0.596927	0.417613	0.0730334	0.419007	0.6806	0.328227	-0.234559	0.219213	0.469644	0.588003	0.768003	0.455297
PKN3	brown	-0.0056346	-0.330665	-0.56509	0.682075	0.498079	0.111349	0.255327	0.610552	0.412277	-0.00586909	0.0675561	0.15376	0.14563	0.730025	0.360972
ZBTB7B	brown	0.120736	-0.4074	-0.733742	0.548621	0.33157	-0.00460863	0.312627	0.619752	0.633934	0.203628	0.113081	0.295696	0.275382	0.851429	0.514087
SHC1	brown	-0.0405534	-0.352111	-0.59324	0.526859	0.289458	0.0293158	0.209001	0.53143	0.65178	0.316911	-0.0801768	0.00863242	-0.0040864	0.8169	0.379892
IL6R	brown	0.11339	-0.320771	-0.799514	0.343862	0.0214986	-0.158227	0.304775	0.462391	0.636323	0.195172	0.220967	0.492405	0.234409	0.87925	0.546381
LMNA	brown	0.0653669	-0.403999	-0.67304	0.343003	0.0947111	0.0744888	0.317126	0.537249	0.379152	-0.126941	0.36404	0.263637	0.388311	0.767116	0.317547
ITGA5	brown	-0.00761109	-0.244341	-0.660043	0.501159	0.199044	-0.0656873	0.172559	0.451749	0.437475	0.0416872	0.114441	0.224471	0.262125	0.789958	0.447663
RAVER1	brown	0.183277	-0.588923	-0.642782	0.565196	0.434377	0.210584	0.288625	0.715924	0.673803	0.237781	0.270485	0.148274	0.0986847	0.745732	0.309088
CXCL16	brown	0.230456	-0.301889	-0.756174	0.130698	-0.175223	-0.19729	0.360679	0.344538	0.475978	0.0626265	0.46466	0.724082	0.391743	0.703271	0.486512
ELTD1	brown	-0.0695739	0.0587626	-0.697517	0.407205	-0.00418677	-0.377208	0.0984899	0.223162	0.394688	0.0444615	0.139982	0.310825	0.240444	0.75217	0.654099
GBP2	brown	0.0109883	-0.27158	-0.693085	0.509379	0.172766	-0.0624904	0.288672	0.494725	0.426666	-0.0156344	0.14575	0.253878	0.235469	0.858145	0.467248
MAPKAPK2	brown	0.0510051	-0.376846	-0.786984	0.649571	0.332868	-0.0205968	0.275472	0.62722	0.659615	0.204845	0.1801	0.239736	0.204082	0.928114	0.560564
OTUD7B	brown	0.0752106	-0.168187	-0.725403	0.369854	0.0668907	-0.228531	0.242244	0.391912	0.486589	0.0604828	0.148068	0.424559	0.486579	0.765264	0.648187
MSX1	brown	0.161629	-0.375619	-0.701094	0.624555	0.360477	0.0274707	0.308393	0.593049	0.558117	0.110008	0.398867	0.256224	0.101965	0.689216	0.42733
S100A11	brown	0.0858909	-0.331702	-0.800713	0.385274	0.0899592	-0.0918774	0.446335	0.533226	0.438964	-0.0835292	0.251003	0.541747	0.38181	0.884343	0.506153
FSTL1	brown	0.0628997	-0.257045	-0.744542	0.377998	0.0055347	-0.233388	0.0537167	0.345413	0.636091	0.249684	0.355322	0.234479	0.0841983	0.830039	0.525501
IGFBP7	brown	0.0165607	-0.326712	-0.696381	0.322863	0.0467697	-0.0907695	0.323944	0.449509	0.559507	0.111759	0.303938	0.367055	0.182614	0.798075	0.434826
IFI16	brown	0.0676696	-0.0867526	-0.742836	0.334421	-0.041912	-0.29674	0.231185	0.316888	0.361969	-0.0528094	0.160784	0.521602	0.47384	0.819491	0.645053
ADAMTS9	brown	-0.0789697	-0.326037	-0.513273	0.426927	0.211011	0.0597641	0.262868	0.482253	0.491429	0.152205	-0.0498703	0.116732	0.0958887	0.746139	0.304144
TIPARP	brown	0.0779061	-0.196892	-0.703467	0.597208	0.221273	-0.196963	0.0546379	0.41913	0.613621	0.279763	0.137311	0.112935	0.221697	0.795535	0.621921
RBM47	brown	0.0913955	-0.134948	-0.677629	0.269793	-0.0294379	-0.24533	0.244989	0.314222	0.285217	-0.112938	0.193323	0.64382	0.4795	0.699143	0.536486
DTX3L	brown	0.0385738	-0.14741	-0.72978	0.513751	0.149478	-0.242316	0.145919	0.397922	0.524984	0.153508	0.138011	0.351206	0.299869	0.861781	0.656047
SAP30	brown	0.0545991	-0.406096	-0.671704	0.519941	0.337173	0.0722706	0.344292	0.635703	0.580575	0.119175	0.230441	0.405035	0.356472	0.725199	0.439959
ANXA5	brown	0.155005	-0.290446	-0.836381	0.455187	0.0812921	-0.196244	0.365249	0.482487	0.570416	0.109224	0.319486	0.471713	0.378632	0.859911	0.615088
ELOVL7	brown	0.0563039	0.0454607	-0.722363	0.238176	-0.152013	-0.419374	0.1211	0.173999	0.38273	-0.0111067	0.203139	0.355759	0.379561	0.71641	0.645318
MICALL2	brown	0.147194	-0.518166	-0.588247	0.368287	0.232024	0.183116	0.225102	0.578747	0.666496	0.287833	0.22581	0.163508	-0.049278	0.717044	0.200592
SLC4A2	brown	0.0719979	-0.275833	-0.726109	0.581003	0.343271	-0.0351428	0.25724	0.578208	0.384794	-0.0751144	0.293792	0.465514	0.56016	0.749116	0.574037
MID1IP1	brown	0.113181	-0.277249	-0.678832	0.587613	0.377074	-0.0322599	0.334313	0.573292	0.346541	-0.109691	0.217884	0.360993	0.604691	0.705696	0.539871
INPPL1	brown	0.213218	-0.463009	-0.722564	0.411957	0.200782	-0.0303136	0.251459	0.539406	0.857681	0.515003	0.224874	0.316029	-0.0396189	0.777499	0.449978
C10orf10	brown	0.00103029	-0.349955	-0.541694	0.419775	0.278543	0.135668	0.318537	0.580402	0.418025	-0.0132167	0.00243778	0.187813	0.22967	0.755062	0.323279
ZNF22	brown	0.138798	-0.0588148	-0.784324	0.363838	-0.0375934	-0.383179	0.107595	0.274925	0.464884	0.0264929	0.326915	0.378585	0.38446	0.750135	0.698104
ARF6	brown	-0.0612098	-0.243848	-0.577032	0.579849	0.291444	0.00572299	0.211308	0.477442	0.338114	-0.0131231	0.202095	0.197858	0.321944	0.703292	0.426502
CASP7	brown	-0.0188017	-0.177253	-0.599056	0.766621	0.458489	-0.11048	0.092456	0.469874	0.586671	0.30942	0.0349931	0.0495952	0.054362	0.726602	0.549793
ABTB2	brown	0.0382647	-0.370261	-0.55659	0.63779	0.450871	0.0435483	0.231215	0.570193	0.534012	0.238091	-0.00284831	0.221596	0.264589	0.711193	0.435235
SGPL1	brown	0.250863	-0.262581	-0.85443	0.483086	0.106764	-0.309771	0.199687	0.415817	0.774402	0.409422	0.354353	0.418948	0.217624	0.801487	0.738024
PLEKHF1	brown	0.115693	-0.356531	-0.676742	0.532471	0.314509	0.0397498	0.328809	0.606799	0.389364	-0.115843	0.100363	0.286498	0.461631	0.806406	0.437562
KIAA0355	brown	0.0906189	-0.0697796	-0.802898	0.555948	0.154227	-0.343355	0.130545	0.348222	0.429766	0.0234059	0.319395	0.41566	0.535911	0.754116	0.761063
B2M	brown	0.0445194	-0.069256	-0.732564	0.230208	-0.152791	-0.359189	0.24985	0.227137	0.335939	-0.0648553	0.310191	0.543734	0.40431	0.737803	0.584821
PPIB	brown	-0.00703088	-0.442052	-0.59464	0.625662	0.434403	0.168567	0.391924	0.677242	0.413071	-0.0358297	0.129242	0.217556	0.279242	0.764971	0.308804
TUBA1C	brown	-0.0217541	-0.189284	-0.569233	0.543699	0.256002	-0.0136849	0.160462	0.457997	0.391298	0.0260948	0.0148837	0.032891	0.218518	0.756682	0.398058
CDC42EP5	brown	0.108752	-0.431726	-0.591334	0.259365	0.132345	0.13119	0.443928	0.548294	0.481746	0.0509493	0.16483	0.260005	0.101182	0.708568	0.226082
NXN	brown	0.165508	-0.430713	-0.695936	0.539674	0.325219	0.0278411	0.297921	0.611537	0.602392	0.156693	0.233009	0.320116	0.119961	0.784811	0.416495
CD300A	brown	0.0564743	-0.261014	-0.662687	0.100337	-0.083753	-0.111028	0.447351	0.399845	0.396724	-0.0221334	0.205615	0.756598	0.402287	0.703054	0.434832
KCTD5	brown	0.183885	-0.398323	-0.7509	0.480977	0.223531	-0.0245709	0.268016	0.563671	0.593899	0.171717	0.305767	0.343844	0.246734	0.798285	0.502139
RAB3IL1	brown	0.144581	-0.510503	-0.716655	0.552891	0.367851	0.0676248	0.441164	0.679175	0.604545	0.142596	0.170657	0.519107	0.230326	0.811373	0.443449
SLC3A2	brown	0.0681841	-0.436285	-0.575854	0.728366	0.491182	0.140025	0.249532	0.629505	0.68107	0.338644	0.102881	6.32708e-05	-0.0953809	0.735089	0.331003
IRF2	brown	0.191532	-0.272384	-0.797859	0.648813	0.324575	-0.18669	0.213737	0.517998	0.60326	0.154526	0.33855	0.420569	0.31297	0.788527	0.667136
TAP1	brown	-0.0290247	-0.286727	-0.611747	0.554702	0.257414	-0.0134583	0.226056	0.491644	0.460653	0.0956683	0.0317551	0.123042	0.210839	0.827278	0.415165
MLKL	brown	-0.0137978	-0.21526	-0.554412	0.737314	0.416012	-0.0100919	0.217309	0.49704	0.398272	0.0303313	-0.00422928	0.00888632	0.278803	0.720574	0.43281
STAT3	brown	-0.00401642	-0.307831	-0.711612	0.545632	0.224637	-0.0838393	0.173258	0.517629	0.700066	0.311942	0.0392306	0.15156	0.135037	0.902787	0.531422
ATOH8	brown	0.0658343	-0.450254	-0.656699	0.571689	0.403564	0.134892	0.417532	0.687587	0.565527	0.0548135	0.228711	0.241936	0.25469	0.73718	0.372022
USP39	brown	-0.0859855	-0.229018	-0.554971	0.592617	0.324669	0.0231526	0.253641	0.50456	0.48484	0.107034	0.0241864	0.0162119	0.113391	0.720811	0.391354
TNIP2	brown	0.00306945	-0.404898	-0.696699	0.671973	0.43346	0.117496	0.360455	0.705467	0.488436	-0.0215352	0.0728168	0.279583	0.285524	0.892586	0.436319
TMEM150A	brown	0.268837	-0.543662	-0.80312	0.429857	0.228996	0.0179224	0.367478	0.622351	0.704954	0.206902	0.396644	0.385636	0.0948202	0.805189	0.406141
VAMP5	brown	0.163541	-0.627133	-0.729802	0.401714	0.231277	0.200766	0.590734	0.737953	0.626513	0.0705337	0.295901	0.381243	0.116576	0.856573	0.270385
PPIC	brown	0.137972	-0.347091	-0.791189	0.463614	0.172028	-0.129654	0.226556	0.506262	0.631096	0.151421	0.517239	0.405159	0.181903	0.77433	0.52475
PXDC1	brown	0.0881993	-0.444552	-0.743716	0.674594	0.393424	0.0480883	0.302463	0.670781	0.596324	0.114609	0.162837	0.237389	0.173186	0.914405	0.47312
SLC50A1	brown	0.0642038	-0.458675	-0.658741	0.500683	0.291255	0.0664176	0.40955	0.606843	0.492892	0.0345166	0.142666	0.312936	0.218067	0.806473	0.348531
PGM2	brown	0.0199596	-0.163502	-0.719495	0.422499	0.0812355	-0.3157	0.0411215	0.310221	0.668442	0.392368	0.235809	0.392807	0.11874	0.744195	0.642142
LIMS1	brown	-0.0578713	-0.00638303	-0.625512	0.385948	-0.0274276	-0.336466	-0.0658182	0.193156	0.566248	0.339249	0.00560546	0.175703	0.218817	0.752622	0.637887
HNRNPF	brown	0.0685308	-0.152452	-0.825279	0.638829	0.244753	-0.216962	0.138771	0.479074	0.442493	-0.0482367	0.443769	0.384916	0.461436	0.838952	0.716336
TRIM56	brown	0.094857	-0.211047	-0.775887	0.505911	0.193342	-0.151593	0.258545	0.487972	0.534426	0.120997	0.354384	0.462896	0.353499	0.8043	0.673787
TM4SF1	brown	0.00783944	-0.122777	-0.698873	0.415176	0.0191997	-0.229203	0.192133	0.340079	0.455332	0.0652198	0.114778	0.258429	0.27785	0.827972	0.550323
TMED10	brown	-0.0187938	-0.0252137	-0.727193	0.341078	-0.0312392	-0.334763	0.0795112	0.288589	0.486695	0.0789154	0.197854	0.307958	0.484416	0.774248	0.663872
ATF7	brown	0.24201	-0.202328	-0.805543	0.531961	0.181341	-0.29093	0.188094	0.419581	0.662837	0.262161	0.289505	0.305735	0.426772	0.7548	0.731412
TSEN34	brown	0.00734102	-0.486705	-0.587666	0.490221	0.288637	0.226897	0.342194	0.637909	0.545598	0.103303	0.284074	0.0501319	0.0178536	0.720347	0.214384
ZNF217	brown	0.113925	-0.112718	-0.854402	0.398058	-0.0112192	-0.3619	0.135713	0.333554	0.619744	0.196732	0.366324	0.443902	0.262641	0.817796	0.737377
ISG20	brown	0.0193273	-0.326773	-0.639803	0.419722	0.160353	0.06327	0.393651	0.542736	0.351162	-0.106765	0.185744	0.237347	0.345198	0.784575	0.35637
AFF1	brown	0.081762	-0.0545637	-0.746547	0.581156	0.175675	-0.329957	0.0091265	0.334804	0.675417	0.355349	0.143311	0.217073	0.207151	0.775592	0.757827
MYD88	brown	0.0187618	-0.198822	-0.606983	0.419977	0.172082	-0.0943869	0.166259	0.412884	0.474592	0.155574	-0.00906648	0.249429	0.149402	0.792286	0.47817
RELA	brown	0.0601675	-0.355347	-0.698681	0.765909	0.505158	0.0341911	0.240014	0.652127	0.570704	0.146006	0.0720562	0.139221	0.272991	0.836957	0.523595
PARP14	brown	0.119906	-0.0978879	-0.704788	0.281766	-0.108859	-0.318709	0.141899	0.233399	0.445424	0.114668	0.27526	0.397565	0.231128	0.754319	0.576273
MMRN2	brown	-0.00876799	-0.141396	-0.641446	0.39969	0.0603365	-0.218715	0.164617	0.305021	0.401772	0.0597767	0.158899	0.31176	0.205845	0.742252	0.484972
PPP1R3B	brown	0.091247	-0.0894893	-0.675465	0.524722	0.136639	-0.238497	0.160313	0.327381	0.337338	-0.0334758	0.185688	0.201135	0.380357	0.71458	0.586989
EHBP1L1	brown	0.111171	-0.40518	-0.700096	0.259603	0.0610513	0.0252937	0.385687	0.495883	0.465126	0.0413043	0.518789	0.53675	0.144005	0.699236	0.347575
PPP1R14B	brown	0.22853	-0.560599	-0.736137	0.534733	0.350361	0.106268	0.492037	0.700212	0.64968	0.192107	0.247093	0.384364	0.039658	0.812622	0.375999
TNFRSF10D	brown	-0.0196508	-0.269528	-0.557903	0.741125	0.453474	0.0335275	0.196282	0.542756	0.475359	0.111355	-0.0152695	-0.0199495	0.19172	0.742685	0.425092
DPY19L1	brown	0.0963888	-0.222572	-0.837179	0.333967	-0.0259696	-0.303558	0.0694054	0.356309	0.692878	0.287514	0.400576	0.393003	0.225929	0.831994	0.646755
2019-03-03	brown	-0.00975208	-0.37985	-0.661919	0.667223	0.400898	0.0226542	0.171047	0.59287	0.691091	0.304287	0.115277	0.0994748	0.0966004	0.829914	0.47833
GNG5	brown	-0.0334372	-0.388863	-0.656627	0.535329	0.293067	0.0922569	0.357886	0.606775	0.485868	0.0477639	0.188009	0.276418	0.139483	0.802056	0.350401
PODN	brown	0.165553	-0.337842	-0.699862	0.317182	0.117477	-0.0531463	0.345564	0.49404	0.509397	0.0298852	0.26521	0.445898	0.220046	0.749867	0.420256
CTDSP2	brown	0.0937094	-0.143585	-0.68263	0.617242	0.345517	-0.224471	0.121699	0.431053	0.564387	0.253459	0.0840729	0.302054	0.285081	0.71539	0.696658
PLEKHF2	brown	0.110135	-0.0473468	-0.710523	0.627597	0.183972	-0.364179	-0.0112945	0.289949	0.632992	0.341599	0.201207	0.165652	0.186891	0.724916	0.735116
TUBB6	brown	0.0680174	-0.348579	-0.689289	0.405445	0.126742	-0.0189558	0.331997	0.507289	0.5214	0.0884924	0.128355	0.247927	0.155581	0.844359	0.395967
SLC35A4	brown	0.0896095	-0.425994	-0.666054	0.437926	0.24129	0.0226602	0.290578	0.559875	0.647838	0.28326	0.107397	0.310785	0.0329403	0.809669	0.406505
RUFY1	brown	0.272398	-0.466444	-0.758065	0.537944	0.327698	0.0115689	0.423476	0.640098	0.61652	0.12103	0.350961	0.423306	0.18053	0.758647	0.475611
METRNL	brown	0.0369945	-0.568378	-0.598039	0.594653	0.384785	0.23129	0.334378	0.686204	0.627856	0.232928	0.172761	0.0803479	-0.00506669	0.793957	0.239441
ANO6	brown	0.0508319	-0.173446	-0.704752	0.465212	0.103391	-0.254542	0.0255407	0.346024	0.712354	0.429906	0.108246	0.233374	0.0642014	0.822232	0.632621
GPR4	brown	-0.0382566	-0.314525	-0.544438	0.562709	0.315985	0.050214	0.255238	0.522903	0.491068	0.128817	-0.115631	0.0320828	0.189542	0.768982	0.351169
AGTRAP	brown	0.153243	-0.55236	-0.810063	0.377188	0.164935	0.108324	0.471386	0.699962	0.642555	0.0538277	0.465999	0.437292	0.233861	0.860307	0.377548
PARP10	brown	0.174641	-0.591843	-0.695217	0.374777	0.241903	0.184004	0.441148	0.671653	0.631515	0.167644	0.410763	0.412685	0.0746	0.759762	0.260331
LDLRAD3	brown	0.120023	-0.138664	-0.769453	0.295059	-0.0809702	-0.323127	0.121166	0.279071	0.509756	0.142647	0.276333	0.418262	0.397592	0.771279	0.643049
ZBTB42	brown	0.169959	-0.407518	-0.774218	0.340175	0.0743628	-0.0722434	0.279253	0.498128	0.539701	0.0549789	0.488111	0.416613	0.162721	0.794378	0.446165
ZNRF2	brown	0.0673631	0.0889685	-0.720024	0.422969	0.024261	-0.444017	0.0386728	0.215439	0.385718	0.0775486	0.0961099	0.506191	0.469187	0.724552	0.79414
RNF135	brown	0.225225	-0.313388	-0.821732	0.36497	0.0442441	-0.268927	0.267235	0.40148	0.721855	0.322884	0.389114	0.566085	0.120846	0.775828	0.609309
RELL1	brown	0.0333819	-0.101783	-0.650654	0.407865	0.0376251	-0.280967	0.044965	0.265513	0.564045	0.311182	0.143094	0.290789	0.193205	0.740178	0.616303
COA4	brown	0.106655	-0.417569	-0.750787	0.566958	0.345472	0.047117	0.465611	0.678886	0.483297	-0.0488082	0.24355	0.423832	0.441323	0.831095	0.48343
FAM181B	brown	0.238088	-0.571332	-0.697449	0.274117	0.123899	0.111222	0.380913	0.601946	0.611656	0.137822	0.500122	0.390244	0.192694	0.722176	0.28705
IST1	brown	0.0625582	-0.192666	-0.747415	0.587072	0.264633	-0.182957	0.256913	0.483137	0.466303	-0.0210443	0.184521	0.278984	0.523791	0.789091	0.638485
BACE2	brown	0.0551894	-0.188152	-0.710403	0.751282	0.410889	-0.123351	0.213765	0.527709	0.44717	0.0446232	0.100464	0.254755	0.360819	0.8384	0.627014
C1S	brown	-0.0240502	-0.32674	-0.582583	0.339729	0.136614	-0.0213757	0.256603	0.461174	0.532033	0.134476	0.0316268	0.205295	0.162674	0.748461	0.354298
BGN	brown	0.0300892	-0.465627	-0.572787	0.376532	0.219782	0.0494799	0.308204	0.507661	0.502027	0.124353	0.232695	0.356073	0.0958612	0.694136	0.274367
ORAI1	brown	0.0602806	-0.437978	-0.70371	0.436919	0.209744	-0.0109025	0.291891	0.552891	0.58448	0.183691	0.182774	0.406441	0.134651	0.841416	0.40803
LIMK2	brown	0.0156793	-0.431547	-0.544125	0.283842	0.123692	0.0651565	0.249887	0.490551	0.65372	0.309517	-0.00254654	0.145071	-0.0195301	0.764082	0.264316
ANXA2	brown	0.133406	-0.268718	-0.817031	0.338375	-0.0155576	-0.156153	0.293292	0.437963	0.423021	-0.10253	0.534251	0.409554	0.333831	0.828858	0.51468
PTTG1IP	brown	0.122513	-0.380429	-0.831293	0.424935	0.12181	-0.079908	0.315853	0.573362	0.738138	0.232772	0.305787	0.372257	0.219734	0.905892	0.554657
FHL3	brown	0.160687	-0.356941	-0.756844	0.479799	0.195567	-0.132853	0.270375	0.487646	0.602223	0.202683	0.234931	0.393476	0.158899	0.815362	0.514285
FAM167B	brown	0.211733	-0.429225	-0.69629	0.659439	0.455931	0.0534901	0.405451	0.654952	0.519649	0.0491945	0.264983	0.299525	0.188149	0.74471	0.428235
LHFP	brown	0.0559398	-0.200669	-0.682329	0.317538	-0.00904574	-0.227817	0.156284	0.320108	0.612239	0.270103	0.218012	0.37462	0.0913358	0.760981	0.544815
SMTN	brown	0.0407185	-0.40075	-0.528666	0.638079	0.488827	0.143509	0.231755	0.600325	0.559469	0.213532	-0.0313182	0.00145974	0.000695054	0.70677	0.318047
CLDN5	brown	0.0890797	-0.427093	-0.682142	0.303955	0.106386	0.0922309	0.409219	0.570037	0.474568	-0.0429869	0.309236	0.364283	0.220551	0.774761	0.303966
IRAK1	brown	0.0117577	-0.45183	-0.655181	0.503966	0.327007	0.131015	0.338322	0.647459	0.554575	0.118771	0.208766	0.37541	0.127256	0.802101	0.372951
CSF1	brown	0.11064	-0.41673	-0.730621	0.73582	0.431231	0.00354326	0.278119	0.63998	0.652969	0.216618	0.124365	0.170969	0.199225	0.87647	0.506614
SOCS3	brown	0.0228279	-0.299127	-0.578093	0.499077	0.234907	0.0269421	0.264875	0.511687	0.470488	0.0792209	-0.0321123	0.0764561	0.270907	0.789861	0.3828
2019-09-09	brown	0.101564	-0.570723	-0.708363	0.502804	0.30762	0.128947	0.410598	0.697312	0.735818	0.270912	0.150201	0.261631	0.048642	0.87503	0.354997
MAFF	brown	0.024387	-0.384996	-0.586861	0.618479	0.376081	0.128255	0.322368	0.608055	0.446399	0.0198352	0.0568813	0.0285723	0.261037	0.765152	0.342397
CIB1	brown	0.291157	-0.582133	-0.719714	0.282153	0.117777	0.150629	0.576682	0.653784	0.608764	0.0567693	0.473131	0.374682	0.16269	0.720856	0.249383
RPS27L	brown	0.0743375	-0.390975	-0.634782	0.517219	0.319499	0.0480353	0.527065	0.607548	0.477749	0.0287097	0.144373	0.360188	0.218205	0.707052	0.372053
IFITM2	brown	0.0479962	-0.426217	-0.691629	0.435652	0.235987	0.0611314	0.506099	0.626969	0.525345	0.0163684	0.0639115	0.316348	0.272697	0.845128	0.393395
WBP5	brown	0.0748069	-0.256625	-0.702109	0.771768	0.388885	-0.0956661	0.211069	0.530729	0.462096	0.0355579	0.263003	0.207523	0.318159	0.774199	0.564
UBALD2	brown	0.0227921	-0.502661	-0.657086	0.740991	0.579511	0.256872	0.504076	0.818872	0.464626	-0.0497985	0.116805	0.230035	0.292886	0.824141	0.378472
IL3RA	brown	0.152793	-0.330438	-0.69343	0.69711	0.409274	-0.00351519	0.30188	0.573835	0.495144	0.0423399	0.288791	0.210478	0.140913	0.732744	0.45852
SP140L	brown	-0.0121259	-0.14592	-0.687208	0.347797	-0.00419776	-0.222045	0.255047	0.310294	0.357218	-0.0398452	0.307949	0.511834	0.194498	0.710169	0.51555
TMEM179B	brown	0.0943127	-0.480247	-0.800675	0.37984	0.150977	0.016575	0.485874	0.621742	0.559399	-0.0107159	0.371413	0.444293	0.404357	0.823207	0.420965
IRF7	brown	0.0182992	-0.389763	-0.713387	0.526092	0.297353	0.0850379	0.386495	0.648687	0.445351	-0.0694665	0.178402	0.319527	0.358111	0.870167	0.419555
P4HB	brown	-0.128742	-0.46441	-0.465088	0.603445	0.494087	0.310895	0.301468	0.691269	0.460453	0.090475	-0.0992506	0.0129948	0.0613554	0.744893	0.180046
IFITM1	brown	0.117213	-0.340893	-0.732358	0.377742	0.123023	-0.0779608	0.459351	0.516658	0.477887	-0.00299496	0.187468	0.422567	0.307292	0.840605	0.464416
LAMP1	brown	-0.035891	-0.31935	-0.638997	0.506552	0.284747	0.0368019	0.308036	0.57007	0.388162	-0.0747567	0.202869	0.356784	0.577372	0.729911	0.423325
RASA3	brown	0.0862238	-0.310127	-0.713987	0.346882	0.0660574	-0.0400353	0.302319	0.48305	0.340793	-0.151543	0.394381	0.494745	0.529697	0.749658	0.461896
KATNA1	brown	0.136279	-0.214189	-0.800312	0.466256	0.0983156	-0.234069	0.196054	0.407698	0.490333	0.00794584	0.525238	0.367112	0.377358	0.736347	0.6085
COL4A1	brown	-0.101133	-0.227217	-0.536318	0.364439	0.0908701	-0.0943089	0.149431	0.349607	0.426675	0.137356	0.00360798	0.186991	0.144617	0.730716	0.385375
EIF4EBP1	brown	0.020266	-0.341152	-0.626199	0.725909	0.516501	0.0740949	0.343976	0.644809	0.439993	-0.00488326	0.018306	0.243949	0.214154	0.776844	0.446543
PLSCR1	brown	-0.00737395	-0.156752	-0.688965	0.433494	0.0697259	-0.186479	0.189896	0.379922	0.459253	0.06559	0.0998338	0.221204	0.246738	0.853813	0.548534
S100A16	brown	0.060184	-0.44546	-0.62551	0.327516	0.080078	0.0727996	0.340699	0.513349	0.556907	0.170034	0.192325	0.198694	0.0513253	0.783889	0.274873
LITAF	brown	0.113397	-0.270783	-0.7142	0.479271	0.151574	-0.14367	0.254259	0.466334	0.459529	0.0257402	0.194217	0.308071	0.537281	0.772848	0.54441
SPATS2L	brown	0.130156	-0.365338	-0.691772	0.660575	0.337981	-0.0582966	0.218482	0.529544	0.644699	0.303619	0.383066	0.236173	0.0819337	0.69372	0.496649
GIMAP5	brown	0.161053	-0.311022	-0.710546	0.343529	0.066894	-0.0943775	0.349135	0.448644	0.454369	-0.0268329	0.239717	0.383287	0.282664	0.776466	0.43962
EPHB4	brown	0.041039	-0.233917	-0.704036	0.349031	0.0569928	-0.154091	0.148951	0.381514	0.523206	0.133539	0.359798	0.30168	0.139461	0.732855	0.456841
ARID5A	brown	-0.0102251	-0.363543	-0.551824	0.602452	0.367527	0.133171	0.26256	0.58493	0.425864	0.0577711	-0.0145937	0.0805272	0.22026	0.7703	0.336645
CASP4	brown	0.0566415	-0.160559	-0.755204	0.484851	0.114569	-0.251188	0.261417	0.407017	0.475244	0.048971	0.0813196	0.392034	0.378983	0.875079	0.628986
SERTAD1	brown	0.0870658	-0.478487	-0.637232	0.741332	0.516789	0.178525	0.338742	0.713466	0.467552	9.19047e-05	0.160259	0.123242	0.205762	0.799295	0.338303
ACSL5	brown	0.0247067	-0.161318	-0.620561	0.277669	0.00774096	-0.14965	0.238983	0.358043	0.45745	0.0565884	0.0246247	0.253255	0.270104	0.759046	0.446257
SERPINA1	brown	0.0964211	-0.333649	-0.672394	0.351266	0.151396	-0.063307	0.402383	0.500948	0.397447	-0.0750834	0.10874	0.503091	0.43289	0.765401	0.431744
LRP10	brown	0.125665	-0.475961	-0.719734	0.454041	0.214242	0.00127746	0.297148	0.57983	0.848446	0.458425	0.168133	0.245598	0.0358184	0.848528	0.443492
C5orf56	brown	0.172411	-0.436692	-0.751094	0.426001	0.167357	0.00469437	0.454216	0.571396	0.452444	-0.0559703	0.38588	0.476975	0.340225	0.792214	0.434758
CDC42SE1	brown	0.0382061	-0.188398	-0.749948	0.650008	0.287628	-0.186503	0.197947	0.477773	0.439412	0.014456	0.0943169	0.304951	0.517792	0.852155	0.650009
MYO1C	brown	0.119639	-0.354481	-0.707186	0.347065	0.097794	-0.112481	0.258138	0.435942	0.566778	0.165337	0.338654	0.444179	0.0779758	0.742704	0.434588
TEAD4	brown	-0.0840483	-0.239757	-0.562847	0.637525	0.378353	0.0548399	0.218215	0.54147	0.356124	-0.0389226	-0.0541259	0.0779562	0.190828	0.808665	0.392393
S100A6	brown	0.127414	-0.474463	-0.652522	0.461984	0.289475	0.170018	0.510673	0.668105	0.461396	-0.0256343	0.121347	0.308143	0.207632	0.81072	0.307264
MPZL1	brown	0.12643	-0.28961	-0.757805	0.355732	0.00734538	-0.196203	0.231262	0.401866	0.686286	0.316886	0.267916	0.379685	0.0836406	0.84629	0.55017
TOR4A	brown	0.0294207	-0.371325	-0.675711	0.372564	0.1735	0.0343514	0.414226	0.559909	0.504945	0.0696886	0.191517	0.467237	0.191958	0.771153	0.392425
SOWAHC	brown	0.123674	-0.0188677	-0.759551	0.479786	0.0391584	-0.441923	-0.0427901	0.231707	0.52382	0.223126	0.261604	0.318516	0.352183	0.75323	0.773397
MAFK	brown	-0.0162685	-0.27451	-0.624264	0.610218	0.374376	0.0443895	0.348765	0.566117	0.30243	-0.131538	0.167557	0.229704	0.421915	0.717062	0.454446
PNP	brown	-0.0703949	-0.301858	-0.526283	0.599284	0.339788	0.0955803	0.249323	0.534271	0.439285	0.0929348	-0.0777983	0.030414	0.163771	0.765861	0.311689
TGM2	brown	0.0401848	-0.148674	-0.650086	0.344549	0.0468242	-0.186169	0.236425	0.351345	0.402659	0.00676465	0.122182	0.325081	0.284618	0.754442	0.485099
LINC00963	brown	0.138097	-0.40049	-0.652429	0.257351	0.000966355	-0.0519207	0.238185	0.418561	0.635241	0.264612	0.303788	0.191369	0.0193168	0.738655	0.351731
PSMB8	brown	0.0791902	-0.355868	-0.76414	0.403666	0.113321	-0.0748513	0.415928	0.533291	0.49954	0.00912566	0.240625	0.444495	0.292135	0.878048	0.475723
CARD16	brown	0.154743	-0.333261	-0.663582	0.43492	0.175592	-0.101101	0.409303	0.472625	0.39523	-0.00979935	0.364853	0.522901	0.277279	0.689044	0.446146
HLA-E	brown	0.0385244	-0.260605	-0.718383	0.232822	-0.0966646	-0.141445	0.29581	0.375013	0.444957	-0.0104616	0.331017	0.425434	0.2394	0.804203	0.421795
CFI	brown	0.108987	-0.144511	-0.764723	0.212027	-0.119919	-0.283813	0.272617	0.3096	0.410886	-0.0768321	0.3623	0.490648	0.344065	0.76294	0.547732
HLA-A	brown	0.0115432	-0.469031	-0.603099	0.419103	0.202761	0.101856	0.418776	0.574106	0.530208	0.11155	0.153228	0.261444	0.149475	0.769815	0.270329
SIPA1	brown	0.123063	-0.475004	-0.756669	0.414272	0.266157	0.0590236	0.516379	0.663761	0.538184	0.0409007	0.313521	0.690846	0.326871	0.775906	0.444196
GPSM3	brown	0.165898	-0.403438	-0.792467	0.342401	0.113876	-0.105268	0.497545	0.539461	0.580958	0.109485	0.271145	0.712594	0.29467	0.804206	0.519791
S1PR3	brown	-0.0307491	-0.0883764	-0.660623	0.206384	-0.130442	-0.309911	0.131879	0.224406	0.520931	0.210133	0.132988	0.372689	0.221074	0.759408	0.570119
CLIC1	brown	0.0865018	-0.357802	-0.821083	0.356595	0.0295713	-0.109033	0.356058	0.512806	0.531211	0.00224889	0.337683	0.450217	0.312886	0.915896	0.491342
EMP2	brown	0.212696	-0.294837	-0.696021	0.317739	0.0299009	-0.198586	0.224167	0.356188	0.634907	0.28881	0.306421	0.416797	0.0654766	0.71491	0.49266
KCTD11	brown	0.0945015	-0.411318	-0.630107	0.615345	0.372449	0.0689146	0.221397	0.590265	0.539107	0.135101	0.257504	0.219389	0.229232	0.714427	0.377212
IRF9	brown	0.0911575	-0.400823	-0.701467	0.52772	0.275058	0.00664635	0.287004	0.573098	0.526695	0.0741376	0.247219	0.263816	0.266753	0.827443	0.444774
IFI30	brown	0.0895182	-0.33916	-0.740368	0.320211	0.0388551	-0.0783332	0.387879	0.490431	0.404264	-0.0841136	0.224062	0.522203	0.449251	0.840909	0.446733
CEBPD	brown	0.0465952	-0.417141	-0.629588	0.504775	0.297862	0.159633	0.407997	0.652165	0.485394	-0.0161928	0.128109	0.152872	0.242419	0.783196	0.33315
APOL6	brown	-0.0529713	-0.168297	-0.620089	0.517049	0.193511	-0.13958	0.123151	0.406519	0.513521	0.188231	0.00857164	0.19663	0.180304	0.817324	0.540583
RP11-211G3.2	brown	-0.0333403	-0.383774	-0.547808	0.496451	0.326485	0.140948	0.241853	0.5822	0.530051	0.136008	0.0564703	0.0241276	0.138585	0.727269	0.313574
CD99P1	brown	0.197182	-0.262169	-0.761306	0.144882	-0.146827	-0.15989	0.317276	0.356355	0.486416	0.0246415	0.420279	0.456119	0.273184	0.73468	0.448938
GPX1	brown	0.127813	-0.667819	-0.651126	0.35536	0.299825	0.338705	0.683936	0.795553	0.524124	-0.00396826	0.286591	0.530606	0.116504	0.749297	0.163623
HLA-B	brown	0.0464923	-0.294343	-0.659918	0.244874	-0.041814	-0.130735	0.358589	0.371869	0.368255	-0.045918	0.296577	0.480648	0.281592	0.733174	0.376165
KIAA0040	brown	-0.028422	-0.153219	-0.583209	0.453321	0.13247	-0.142596	0.136603	0.342624	0.375361	0.0639448	0.0407609	0.225019	0.172177	0.768697	0.483448
TXNDC5	brown	-0.105344	-0.00616084	-0.638846	0.418466	0.0863755	-0.226713	0.131471	0.311035	0.227293	-0.172473	0.0980037	0.281247	0.43591	0.726629	0.542488
PSMB9	brown	0.124094	-0.391242	-0.746374	0.317292	0.0547591	-0.0398075	0.476696	0.523994	0.443626	-0.0517122	0.327125	0.520901	0.346268	0.816198	0.416177
C8orf58	brown	0.289854	-0.550437	-0.675526	0.319758	0.169392	0.0629003	0.391712	0.567333	0.656796	0.242446	0.34527	0.414047	-0.0174614	0.714952	0.324473
ARFGAP3	brown	-0.0231197	0.102729	-0.684473	0.391756	-0.0570306	-0.402236	-0.0488328	0.164775	0.405451	0.0838663	0.191404	0.215269	0.344582	0.738195	0.683159
EFNA4	brown	0.163478	-0.438633	-0.659828	0.51858	0.371902	0.0523662	0.297866	0.614405	0.620136	0.20193	0.229075	0.276883	0.216852	0.707286	0.407769
IL10RB	brown	0.143329	-0.434387	-0.623949	0.380309	0.234805	0.0518889	0.340519	0.569963	0.452555	-0.00274276	0.158624	0.449165	0.235277	0.727505	0.333339
CFB	brown	0.0945903	-0.178958	-0.669504	0.24065	-0.0216131	-0.144113	0.372957	0.368222	0.320819	-0.140604	0.296549	0.372055	0.314903	0.702117	0.431993
LYN	brown	0.0970564	-0.0591822	-0.740162	0.170837	-0.182226	-0.389317	0.185002	0.203139	0.354584	-0.0222656	0.297837	0.716394	0.481867	0.721784	0.645709
GALNT4	brown	0.0393618	-0.0691232	-0.732747	0.335371	-0.0664181	-0.365151	-0.000505529	0.247532	0.602449	0.259027	0.264341	0.329676	0.27705	0.762522	0.681418
RP11-395B7.7	brown	0.101615	-0.234604	-0.868493	0.510715	0.134341	-0.209738	0.302143	0.489874	0.511507	-0.0243594	0.446815	0.45505	0.369976	0.872685	0.645316
MT1L	brown	0.11023	-0.540043	-0.657337	0.350964	0.168442	0.135888	0.505088	0.630374	0.572617	0.0706584	0.235231	0.335455	0.192122	0.788667	0.26022
AC011526.1	brown	0.0557182	-0.243257	-0.65373	0.77079	0.472843	-0.0923285	0.208214	0.527847	0.47248	0.0710781	0.0778691	0.186318	0.218093	0.757037	0.535839
RP11-420L9.5	brown	0.114759	-0.411549	-0.639264	0.344218	0.110103	0.00438401	0.259561	0.497186	0.523646	0.0963609	0.214193	0.3202	0.142744	0.790632	0.348491
FBL	cyan	0.1959	-0.533933	-0.275115	0.224347	0.341784	0.470475	0.795625	0.641915	-0.00283953	-0.39962	0.126901	0.344242	0.282786	0.350764	-0.0929632
TBCB	cyan	0.0493237	-0.566769	-0.174226	0.229351	0.384452	0.605784	0.715407	0.694243	-0.0140591	-0.407041	0.0435619	0.195284	0.353484	0.316027	-0.205836
TFPT	cyan	0.0992342	-0.637237	-0.0767137	0.25094	0.438922	0.612342	0.688373	0.639498	0.110982	-0.123189	-0.0376687	0.129699	0.000499859	0.257915	-0.291371
MOSPD3	cyan	0.272048	-0.725922	-0.317386	-0.175231	-0.0297867	0.409783	0.637433	0.532046	0.411317	0.0741566	0.339946	0.390626	-0.0993905	0.32205	-0.221521
RPL19	cyan	0.158898	-0.558423	-0.369398	0.290441	0.333449	0.414368	0.915037	0.693834	0.137094	-0.307038	0.0782192	0.441403	0.289936	0.454125	-0.00678472
RPS25	cyan	0.186525	-0.489259	-0.212498	0.0230575	0.115214	0.35548	0.846591	0.480535	0.152049	-0.159343	0.0547868	0.323589	0.0845358	0.244423	-0.122531
PFDN5	cyan	0.25984	-0.496363	-0.0870095	-0.0130888	0.148334	0.428342	0.819156	0.432879	-0.0253424	-0.300544	0.108952	0.166904	0.0372418	0.088226	-0.300309
ATP5E	cyan	-0.00926365	-0.525505	0.0895414	0.0864077	0.307903	0.588867	0.759505	0.498671	-0.0255594	-0.214982	-0.170622	0.170036	-0.0404148	0.0945167	-0.421009
CHCHD5	cyan	0.122353	-0.709091	-0.228145	-0.0782319	0.0723578	0.548111	0.674222	0.575885	0.326553	-0.000519968	0.344423	0.292452	-0.168522	0.302285	-0.312477
RPL23	cyan	0.239701	-0.527185	-0.464744	0.142018	0.0958262	0.228765	0.873166	0.554923	0.225794	-0.220483	0.249917	0.47443	0.216246	0.473546	0.0478196
RPL27	cyan	0.166116	-0.609401	-0.332408	0.250879	0.298969	0.423184	0.932999	0.666079	0.236427	-0.143023	0.0777358	0.359139	0.0857361	0.421004	-0.0707062
BLOC1S1	cyan	0.233893	-0.702003	-0.24436	0.141005	0.283537	0.508758	0.82674	0.647158	0.222514	-0.118284	0.149569	0.395806	0.114794	0.311315	-0.188965
RPS11	cyan	0.238449	-0.626377	-0.326873	0.216362	0.323236	0.434918	0.926137	0.680929	0.257785	-0.1176	0.0766741	0.400707	0.154894	0.377828	-0.0460636
RPL11	cyan	0.221263	-0.504515	-0.467782	0.216431	0.194312	0.265791	0.882632	0.599564	0.176694	-0.294253	0.231124	0.454739	0.256682	0.467026	0.0688001
RPS8	cyan	0.186399	-0.479105	-0.317475	0.141742	0.20059	0.347303	0.86166	0.575645	0.10317	-0.304766	0.114471	0.388162	0.189527	0.346922	-0.0496615
RPL32	cyan	0.189008	-0.524672	-0.1553	0.151228	0.297328	0.438229	0.914675	0.561327	0.100083	-0.181639	-0.0492804	0.317888	0.119223	0.212136	-0.162515
RPL10	cyan	0.219928	-0.551802	-0.487981	0.22091	0.209587	0.323188	0.854749	0.66039	0.299972	-0.155172	0.285912	0.421597	0.181313	0.48443	0.0786696
RPL7A	cyan	0.0933617	-0.576096	0.00845622	0.112024	0.382315	0.639085	0.86147	0.602284	0.0593983	-0.173376	-0.0967138	0.109973	-0.10497	0.10757	-0.364435
RPS3	cyan	0.206964	-0.629784	-0.319212	0.266314	0.393333	0.452774	0.880936	0.713441	0.287602	-0.0853117	0.0986412	0.38326	0.125854	0.371249	-0.0264493
C11orf48	cyan	0.116646	-0.637194	-0.205326	0.198619	0.35334	0.534318	0.652599	0.623203	0.178235	-0.163672	0.103396	0.131953	-0.0529947	0.308208	-0.258993
RPS14	cyan	0.202741	-0.659068	-0.309085	0.167182	0.28477	0.492911	0.918345	0.690416	0.27582	-0.0981619	0.10444	0.326457	0.0590898	0.392433	-0.115596
RPL27A	cyan	0.197296	-0.554951	-0.331577	0.223516	0.274068	0.414819	0.916568	0.63983	0.175727	-0.214101	0.106943	0.340672	0.0754998	0.399986	-0.0683288
RPS21	cyan	0.186839	-0.6087	-0.14682	0.218433	0.410817	0.563404	0.846985	0.655802	0.11595	-0.147789	0.0260484	0.3286	0.0846491	0.237925	-0.189909
RPS7	cyan	0.227305	-0.536231	-0.381403	0.197631	0.222046	0.351593	0.83223	0.611214	0.207515	-0.208017	0.175966	0.406402	0.115626	0.419894	-0.0096468
TMEM134	cyan	0.159682	-0.653564	-0.274363	-0.112167	0.0191841	0.464074	0.622749	0.546356	0.264516	-0.0867536	0.181693	0.267247	-0.0707073	0.355875	-0.26765
RPL38	cyan	0.170161	-0.61147	-0.223855	0.277226	0.375642	0.47483	0.896751	0.649941	0.158217	-0.149819	-0.00340977	0.358093	0.139199	0.338553	-0.114725
ATOX1	cyan	-0.0533961	-0.545453	-0.0691186	0.0774089	0.269008	0.59502	0.726809	0.57296	-0.00547005	-0.321488	-0.0701726	0.209488	0.149389	0.240695	-0.353493
RPL35A	cyan	0.19591	-0.482475	-0.0461597	-0.00138954	0.156318	0.412152	0.864425	0.427463	0.0181558	-0.200791	-0.00339308	0.246786	-0.00956427	0.0890785	-0.26358
COA3	cyan	0.141153	-0.65674	0.00339341	0.0844227	0.362835	0.593616	0.722172	0.574055	0.134316	-0.111175	0.0480963	0.155535	-0.144306	0.0851959	-0.40377
H1FX	cyan	0.0880546	-0.609046	0.0450211	-0.147457	0.142668	0.648869	0.592017	0.48936	0.04618	-0.17987	0.184482	0.0989066	-0.0627219	-0.00692139	-0.456229
RPL37A	cyan	0.146793	-0.584556	-0.11591	0.190222	0.375105	0.542139	0.890434	0.61336	0.119825	-0.12524	-0.048867	0.253639	0.0429775	0.21651	-0.222984
RPL12	cyan	0.193784	-0.553706	-0.389757	0.0927202	0.0963165	0.341038	0.778372	0.567615	0.206576	-0.205633	0.225249	0.407937	0.0882145	0.441053	-0.0631302
RPL23A	cyan	0.200641	-0.5338	-0.251279	0.17484	0.280597	0.37489	0.870063	0.572547	0.261031	-0.000287129	-0.00236196	0.344685	0.0818365	0.312344	-0.0494043
TMEM256	cyan	0.216488	-0.666729	-0.367733	0.0421166	0.154111	0.403155	0.778922	0.633563	0.294594	-0.139305	0.224484	0.45097	0.145982	0.405242	-0.118931
RPS29	cyan	0.175386	-0.510257	-0.29842	0.189295	0.251857	0.365027	0.863636	0.576016	0.167444	-0.15169	0.0698359	0.412915	0.187678	0.367964	-0.0204409
MRPL23	cyan	0.144617	-0.602079	-0.203084	0.139975	0.289874	0.563544	0.70614	0.645491	0.0951344	-0.264632	0.18025	0.274196	0.103398	0.291336	-0.204181
FIS1	cyan	0.00603145	-0.507298	0.016989	0.0998287	0.342393	0.656073	0.764736	0.576879	-0.212993	-0.521254	0.00807068	0.212076	0.308568	0.0961677	-0.378114
UBA52	cyan	0.0878522	-0.576829	0.0266359	0.162663	0.425798	0.640641	0.864865	0.615042	0.0750094	-0.128669	-0.181373	0.12323	-0.0610671	0.120657	-0.339151
RPL41	cyan	0.161384	-0.593014	-0.314382	0.20078	0.253362	0.445831	0.826538	0.625551	0.319076	-0.00927688	0.0844671	0.239599	-0.0671467	0.419221	-0.126898
RPL36A	cyan	0.200009	-0.564715	-0.156043	0.132821	0.261489	0.465135	0.905863	0.562562	0.0801892	-0.203085	0.0256588	0.360936	0.088149	0.230734	-0.194287
RPL17	cyan	0.219285	-0.530239	-0.355559	0.294897	0.292886	0.296011	0.841357	0.594746	0.297422	-0.055619	0.0623873	0.242102	0.0355461	0.406586	0.0310328
CD99	green	0.245932	-0.593869	-0.803313	0.319689	0.105443	0.0739936	0.470029	0.649522	0.718142	0.163109	0.568798	0.438944	0.173293	0.803358	0.353156
PAX6	green	0.281997	-0.395161	-0.547314	0.35837	0.167729	-0.0874935	0.0952048	0.371222	0.854473	0.659653	0.245654	0.192454	-0.143766	0.539647	0.394677
MGST1	green	0.112326	-0.463327	-0.59043	0.358319	0.172605	0.0131166	0.273629	0.501421	0.832136	0.521188	0.0695436	0.127372	-0.0937256	0.710365	0.327402
FYN	green	0.0638432	-0.427574	-0.600599	0.385886	0.219661	-0.00320454	0.277508	0.519751	0.806347	0.504218	0.0263362	0.209433	0.0530652	0.705047	0.407686
CHDH	green	0.205091	-0.478839	-0.508896	0.267178	0.140555	0.0187416	0.203108	0.428121	0.894933	0.692967	0.100278	0.18948	-0.213328	0.587	0.287951
ATP1A2	green	0.141572	-0.301647	-0.215486	0.124155	0.0367344	-0.0486624	-0.0382814	0.128892	0.7909	0.890054	-0.0688608	-0.0365087	-0.473957	0.292568	0.125649
ARHGAP31	green	0.226375	-0.26025	-0.751613	0.368118	0.055087	-0.276078	0.180147	0.350172	0.812134	0.525746	0.292628	0.420856	0.0925346	0.696237	0.64119
AKR7A2	green	0.147833	-0.674613	-0.549502	0.40302	0.315662	0.289243	0.410678	0.664635	0.712102	0.365711	0.360622	0.243599	-0.121623	0.60569	0.135619
PHF21B	green	0.169845	-0.541178	-0.462014	0.376669	0.260763	0.187628	0.273094	0.526928	0.798005	0.551618	0.182851	-0.021348	-0.32773	0.528803	0.151275
IL17RB	green	0.206335	-0.465082	-0.540382	0.416412	0.280591	0.0454186	0.266942	0.513532	0.832736	0.554611	0.0649317	0.142047	-0.0682549	0.609219	0.324078
ATP2B4	green	0.233018	-0.286886	-0.607332	0.253424	-0.037322	-0.277621	0.00865934	0.214136	0.847348	0.688817	0.2518	0.136713	-0.130383	0.608139	0.47672
EYA2	green	0.220273	-0.5389	-0.468317	0.537337	0.412926	0.105652	0.223253	0.527767	0.836121	0.64746	0.129448	0.0926311	-0.241431	0.520425	0.248566
MYLK	green	0.111263	-0.214895	-0.553897	0.150971	-0.0984406	-0.202525	0.00994202	0.208579	0.771567	0.597673	0.29946	0.241329	-0.0281308	0.537139	0.46128
TBC1D1	green	0.151389	-0.454402	-0.637812	0.378385	0.204353	0.00973902	0.275551	0.529994	0.78503	0.456393	0.0852142	0.237844	-0.086204	0.737974	0.373246
PPP2R5A	green	0.0816233	-0.117923	-0.488513	0.472169	0.166374	-0.298445	-0.0354296	0.191252	0.72345	0.660001	0.0613898	0.0497807	-0.13223	0.482411	0.529832
PHKA1	green	0.103303	-0.206227	-0.296136	0.127427	-0.039768	-0.171217	-0.071238	0.0864668	0.795974	0.873402	-0.0786566	-0.0133005	-0.368393	0.371267	0.271951
LAPTM4A	green	0.175738	-0.321261	-0.766311	0.295857	-0.0391674	-0.206976	0.16157	0.378062	0.827546	0.454353	0.399034	0.329547	0.0112119	0.782578	0.509899
MAST4	green	0.17926	-0.248175	-0.579142	0.388451	0.0880791	-0.218618	0.00190565	0.265172	0.841208	0.730609	0.205023	0.13576	-0.202648	0.583209	0.504338
TGFBR3	green	0.112937	-0.233408	-0.7388	0.291162	-0.0423644	-0.300693	0.0142345	0.295103	0.83407	0.525364	0.370699	0.310255	0.0475704	0.731726	0.60417
CYBRD1	green	0.204929	-0.189931	-0.528965	0.113832	-0.137139	-0.282232	-0.0176524	0.147205	0.880179	0.782661	0.231149	0.189738	-0.167622	0.486212	0.468644
ACADVL	green	0.119011	-0.596097	-0.516273	0.27922	0.224657	0.254753	0.398506	0.600409	0.727552	0.372637	0.191044	0.15672	-0.110079	0.619638	0.106557
EVC	green	0.283976	-0.395301	-0.608593	0.122051	-0.0872128	-0.128386	0.0894322	0.29536	0.871686	0.682222	0.41066	0.238215	-0.276074	0.572253	0.364453
MRVI1	green	0.0716658	-0.425693	-0.488237	0.237858	0.101837	0.0347033	0.238671	0.428382	0.792975	0.54063	-0.050172	0.0961528	-0.163861	0.638864	0.260561
FERMT2	green	0.0737341	-0.217526	-0.586017	0.377065	0.0592835	-0.211306	0.0239682	0.290448	0.843261	0.672121	0.0180157	0.0348063	-0.0641254	0.690515	0.514744
GLI2	green	0.351654	-0.594772	-0.480264	0.271138	0.195648	0.117544	0.186543	0.461312	0.80677	0.610351	0.319893	0.137679	-0.331393	0.492093	0.149966
MGLL	green	-0.00895858	-0.341771	-0.376164	0.3663	0.226169	0.0481376	0.104874	0.379008	0.766139	0.675935	-0.0904245	-0.024623	-0.301169	0.536678	0.245601
SRI	green	0.260795	-0.186473	-0.493708	0.0338071	-0.239992	-0.279268	0.02207	0.0926741	0.79092	0.700488	0.261346	0.0874546	-0.249442	0.436023	0.366787
UNG	green	0.247213	-0.44004	-0.57924	0.259486	0.0990111	-0.0237006	0.230471	0.429618	0.90235	0.649261	0.226349	0.180405	-0.198393	0.574062	0.333044
ACACB	green	0.263993	-0.297172	-0.522006	-0.0828076	-0.201517	-0.125059	0.214712	0.213049	0.715987	0.500746	0.335482	0.303331	-0.0453263	0.408762	0.29151
GPR137B	green	0.143461	-0.195598	-0.314091	0.169694	-0.00659095	-0.149491	-0.0277577	0.124985	0.792816	0.843502	-0.0734267	-0.0101242	-0.347759	0.360015	0.282533
SLC25A43	green	0.13141	-0.475562	-0.632832	0.402522	0.213357	0.0267102	0.221901	0.524077	0.737172	0.42871	0.259576	0.267149	-0.0570711	0.673678	0.347654
NEBL	green	0.14874	-0.0290941	-0.553562	0.113815	-0.213857	-0.453486	-0.148022	0.00485214	0.82853	0.76436	0.30061	0.185867	-0.159665	0.458576	0.577921
ADCY2	green	0.150867	-0.483273	-0.545847	0.254275	0.111976	0.0388841	0.236346	0.462106	0.871707	0.586269	0.23342	0.177787	-0.16724	0.598883	0.265992
ADCYAP1R1	green	0.302328	-0.453423	-0.393972	0.104404	-0.00226769	-0.0186477	0.151372	0.26868	0.833947	0.774537	0.192803	0.191744	-0.400316	0.391929	0.174444
SLC1A3	green	0.176951	-0.30665	-0.549445	0.336845	0.118036	-0.149729	0.0723386	0.337887	0.914108	0.761963	0.0403826	0.107749	-0.182583	0.62619	0.447164
CDC14A	green	0.120469	-0.157353	-0.787815	0.415003	0.0187212	-0.351108	0.029544	0.29043	0.754849	0.428903	0.468931	0.28093	0.0751202	0.694941	0.681104
OPHN1	green	0.241701	-0.220595	-0.413315	0.149824	-0.0165543	-0.204446	0.00435301	0.162928	0.847327	0.823029	0.0243125	0.0998517	-0.252091	0.398313	0.390444
LRRC16A	green	0.15097	-0.231467	-0.200635	0.105778	-0.0299224	-0.138293	-0.116025	0.0301586	0.765519	0.920025	0.00532425	-0.0628756	-0.483787	0.233102	0.17588
PGM1	green	0.157822	-0.425852	-0.354504	0.179599	0.0471961	0.0187829	0.0938142	0.281584	0.813084	0.740574	0.0468587	0.0326782	-0.27244	0.461151	0.150896
STK17B	green	0.154532	-0.288008	-0.640629	0.311867	0.0409367	-0.20957	0.109231	0.323335	0.846957	0.611042	0.183875	0.216619	-0.0606116	0.630762	0.507259
ITGB5	green	0.258656	-0.462404	-0.780948	0.36941	0.100478	-0.141685	0.238593	0.468702	0.813992	0.453551	0.46828	0.50259	0.0479598	0.755046	0.505032
FAT1	green	0.248882	-0.209879	-0.324784	0.133392	-0.00783015	-0.167642	-0.15138	0.0883768	0.750081	0.834626	0.191507	0.0963299	-0.343321	0.276589	0.304583
HADHA	green	0.167677	-0.469894	-0.602232	0.226829	0.0359521	-0.0182016	0.347637	0.449681	0.840799	0.537577	0.139217	0.218641	-0.00617054	0.67828	0.325533
TRIP6	green	0.242666	-0.618008	-0.761762	0.276885	0.0897579	0.128887	0.463889	0.651884	0.756784	0.249762	0.42763	0.347454	0.0764229	0.803829	0.299261
FTL	green	0.162586	-0.576305	-0.635349	0.470535	0.344358	0.174344	0.541003	0.71166	0.711278	0.276009	0.0943534	0.272492	0.0440551	0.733677	0.302471
MT3	green	0.143904	-0.707245	-0.410325	0.375594	0.39528	0.408223	0.6099	0.724421	0.726071	0.400494	0.043471	0.194519	-0.170592	0.554036	0.0100516
COQ9	green	0.258985	-0.688839	-0.377757	0.190745	0.188649	0.262861	0.3806	0.50653	0.709522	0.466189	0.341284	0.13842	-0.250246	0.388785	-0.028021
SMOX	green	0.148195	-0.508143	-0.569987	0.400485	0.251132	0.149171	0.380517	0.582238	0.722761	0.366818	0.1671	0.139523	0.0020485	0.661717	0.235639
HEPH	green	0.187607	-0.389935	-0.560353	0.311457	0.107867	-0.0895187	0.113749	0.367024	0.912994	0.729678	0.185837	0.164715	-0.182108	0.59265	0.375056
PHGDH	green	0.206404	-0.609738	-0.619274	0.453913	0.292908	0.162393	0.370458	0.632934	0.765959	0.386224	0.32551	0.270959	0.0517797	0.655014	0.275805
EZR	green	0.325199	-0.463295	-0.59489	0.262748	0.0350194	-0.0934549	0.095332	0.33475	0.833155	0.620271	0.50664	0.252033	-0.235507	0.537243	0.316836
TGFB2	green	0.080452	-0.27562	-0.686692	0.483957	0.156886	-0.189148	0.00531726	0.392541	0.835707	0.543175	0.261754	0.13891	-0.00864649	0.746468	0.560196
CRAT	green	0.0442378	-0.605959	-0.329032	0.407226	0.394325	0.356127	0.273482	0.605323	0.727856	0.530606	-0.116515	-0.108843	-0.311906	0.557554	0.0129008
TIMP3	green	0.251884	-0.204942	-0.397111	-0.0686133	-0.275397	-0.255651	-0.00973102	0.00368838	0.709932	0.690289	0.240589	0.168966	-0.27948	0.337735	0.256817
MTMR3	green	0.241948	-0.250893	-0.465371	0.214172	0.0174093	-0.192051	0.0480506	0.188722	0.799796	0.737421	0.0886516	0.133612	-0.282507	0.466788	0.385823
MLC1	green	0.254474	-0.536955	-0.557679	0.245074	0.087172	0.0412371	0.213665	0.445409	0.939889	0.732217	0.290318	0.162739	-0.353851	0.584101	0.245496
ZFYVE21	green	0.105998	-0.361258	-0.480671	0.41003	0.231537	0.0361748	0.253047	0.451322	0.739212	0.489558	0.0876091	0.0880194	-0.104181	0.526711	0.30062
BMP7	green	0.303153	-0.4687	-0.576332	0.324233	0.145403	-0.040989	0.170379	0.407842	0.831091	0.624593	0.381644	0.251264	-0.166151	0.531462	0.326652
SNTA1	green	0.232962	-0.636594	-0.491584	0.201385	0.141395	0.198409	0.360066	0.529383	0.844512	0.600369	0.286587	0.224823	-0.302458	0.508634	0.121118
CDH20	green	0.221077	-0.402525	-0.477506	0.174491	0.0780183	-0.0315483	0.225702	0.358476	0.805258	0.620786	0.173344	0.245031	-0.0079878	0.431751	0.29255
LAMA1	green	0.290978	-0.34253	-0.504056	0.271772	0.0363603	-0.152354	-0.0357382	0.224424	0.739987	0.598266	0.326905	0.10735	-0.153569	0.487126	0.29946
TBL1X	green	0.0959504	-0.443618	-0.419505	0.38939	0.285192	0.103465	0.170883	0.455736	0.793834	0.661568	0.125732	0.0633284	-0.347854	0.490477	0.236198
MID1	green	0.146783	-0.187011	-0.475911	0.334094	0.0967416	-0.184153	-0.00399204	0.227912	0.792983	0.713296	0.0667843	0.0591781	-0.187432	0.479041	0.452324
ZNF423	green	0.274581	-0.487153	-0.558556	0.302809	0.155985	0.00872932	0.237951	0.457112	0.884482	0.69687	0.208272	0.280109	-0.208036	0.59235	0.348163
PIEZO1	green	0.12269	-0.558271	-0.594903	0.342643	0.224629	0.168947	0.334603	0.596304	0.828848	0.518018	0.151392	0.197639	-0.120351	0.706201	0.256657
SYT17	green	0.254193	-0.528603	-0.555407	0.235191	0.0751669	0.00818052	0.221565	0.42959	0.854449	0.585039	0.259035	0.235104	-0.192797	0.59516	0.250319
ACSBG1	green	0.104027	-0.439797	-0.297749	0.135044	0.0549713	0.0772636	0.0739642	0.277404	0.818922	0.80616	-0.0146941	-0.00819859	-0.391272	0.419315	0.100477
TTC23	green	0.242404	-0.355655	-0.795556	0.357619	0.0556847	-0.164398	0.289754	0.473095	0.783229	0.351691	0.329144	0.386314	0.158462	0.806605	0.557724
FAH	green	0.154811	-0.641187	-0.48681	0.325678	0.268244	0.241555	0.454258	0.615101	0.822262	0.556287	0.0861156	0.203533	-0.233057	0.588353	0.125893
DECR1	green	0.162292	-0.401845	-0.451478	0.0341995	-0.104295	-0.0134923	0.25119	0.303437	0.764223	0.553207	0.142723	0.192761	-0.165596	0.492933	0.185593
TRPS1	green	0.192653	-0.161462	-0.665825	0.343101	0.00226406	-0.360483	-0.0546258	0.200493	0.842503	0.668726	0.39515	0.204748	-0.0783473	0.557351	0.628292
FCGRT	green	0.269077	-0.592245	-0.760124	0.247162	0.0830521	0.0338107	0.460308	0.58986	0.786289	0.342904	0.444303	0.594873	0.0879096	0.735928	0.356586
DNASE2	green	0.284644	-0.525736	-0.508051	0.0194386	-0.0534705	0.0387212	0.298575	0.371021	0.782497	0.544569	0.374777	0.408552	-0.184607	0.446914	0.146442
PON3	green	0.235318	-0.401992	-0.471605	0.151424	-0.00856041	0.0195849	0.211596	0.351049	0.696487	0.472743	0.269143	0.209311	-0.187168	0.473388	0.1989
PON2	green	0.212545	-0.242888	-0.601008	0.109591	-0.158379	-0.272489	0.120105	0.20042	0.850169	0.641758	0.188444	0.27218	-0.0587154	0.579672	0.446904
HIBADH	green	0.271695	-0.240475	-0.63767	0.168209	-0.0912933	-0.260085	0.122378	0.251142	0.797746	0.581934	0.365601	0.412844	-0.0147011	0.558952	0.500291
PTPRZ1	green	0.198041	-0.131007	-0.451885	0.138427	-0.124286	-0.31732	-0.0738	0.0606893	0.77607	0.785882	0.0850113	0.132517	-0.168372	0.44472	0.475272
LHX2	green	0.148484	-0.465095	-0.470724	0.42517	0.293298	0.0831414	0.171692	0.476734	0.843814	0.663781	0.103219	0.0131863	-0.257646	0.532224	0.253372
C10orf54	green	0.139682	-0.53867	-0.604409	0.332202	0.242187	0.149523	0.418386	0.630119	0.722749	0.29434	0.148278	0.313866	0.0496082	0.675224	0.26396
SUFU	green	0.277303	-0.42789	-0.264709	-0.0353568	0.00628288	0.0780428	0.144447	0.239845	0.669872	0.620217	0.188277	0.120772	-0.404809	0.219015	0.0210839
TMEM104	green	0.166488	-0.56463	-0.548462	0.331939	0.256638	0.173433	0.298761	0.599363	0.72428	0.411375	0.130522	0.176625	-0.0111725	0.662612	0.214709
ALDOC	green	0.106399	-0.510319	-0.244628	0.174916	0.138319	0.202296	0.225489	0.374486	0.765708	0.687085	-0.0841315	-0.0600019	-0.376057	0.392629	-0.0173132
RAB34	green	0.219584	-0.579731	-0.619753	0.245537	0.0668178	0.110893	0.370957	0.548216	0.769115	0.37766	0.203412	0.202931	-0.147888	0.755568	0.203022
CPE	green	0.115715	-0.230766	-0.260696	0.0729793	-0.0588533	-0.0709294	-0.0874449	0.111583	0.809651	0.883503	0.0228917	-0.0529608	-0.437833	0.32731	0.18126
ELP4	green	0.133269	-0.323099	-0.587675	0.418744	0.163237	-0.157218	0.116027	0.380584	0.806746	0.590858	0.127675	0.192731	-0.00773355	0.637762	0.485394
CPT1A	green	0.152837	-0.344998	-0.499519	0.213801	0.0271003	-0.129493	0.114817	0.277186	0.89833	0.791049	0.0868463	0.16014	-0.256396	0.55292	0.350969
CD81	green	0.0515238	-0.725184	-0.518966	0.352457	0.319832	0.375776	0.503939	0.748051	0.71705	0.282011	0.164044	0.195439	-0.0982399	0.706315	0.0383802
SOX6	green	0.303383	-0.102948	-0.47334	0.0534344	-0.216308	-0.409433	-0.0654732	-0.0256978	0.695283	0.673993	0.375089	0.299834	-0.185401	0.292759	0.472629
MLEC	green	0.0805297	-0.318429	-0.51857	0.580457	0.380882	-0.0242092	0.0997645	0.469241	0.750225	0.564562	0.0517156	0.0697193	-0.112811	0.608225	0.411499
ACSS3	green	0.194495	-0.357437	-0.654545	0.169494	-0.0654539	-0.156229	0.140584	0.337709	0.87692	0.58154	0.37462	0.273035	-0.0850738	0.646622	0.444196
ALDH2	green	0.111052	-0.489877	-0.433049	0.290502	0.16463	0.125549	0.204366	0.439494	0.851478	0.666454	0.107194	0.0374353	-0.2808	0.53771	0.172731
CHPT1	green	0.0941257	-0.197994	-0.582366	0.533009	0.26734	-0.163432	0.0506129	0.384003	0.736709	0.499787	0.0360857	0.0948893	0.0194168	0.648731	0.533414
RFX4	green	0.139714	-0.371924	-0.61733	0.361694	0.123398	-0.0711015	0.172041	0.428872	0.842699	0.547165	0.127845	0.0922589	-0.109001	0.729642	0.421285
C6orf62	green	0.0668857	-0.171478	-0.548012	0.305797	0.0186185	-0.244797	0.0654008	0.242216	0.74494	0.53128	0.106302	0.125527	-0.0906694	0.564666	0.461127
NR2E1	green	0.175826	-0.40745	-0.41886	0.308099	0.169504	-0.0119047	0.0880325	0.341786	0.867965	0.790634	0.100419	0.0632067	-0.323754	0.474297	0.269632
DPYSL3	green	0.267952	-0.445703	-0.744255	0.234538	-0.0254578	-0.110707	0.2359	0.420111	0.778055	0.410959	0.486536	0.368709	-0.0111024	0.726552	0.431695
EHHADH	green	0.0654743	-0.295223	-0.371349	-0.0513383	-0.173321	-0.0636669	0.0661917	0.181034	0.755839	0.6365	0.136757	0.102368	-0.221699	0.410472	0.174034
PLSCR4	green	0.14315	-0.240789	-0.725069	0.404943	0.069987	-0.231427	0.0743664	0.369659	0.818307	0.489676	0.275303	0.209357	0.0297326	0.757065	0.610703
ARHGEF26	green	0.232012	-0.267757	-0.63355	0.372526	0.0533154	-0.239043	-0.0232889	0.265162	0.854429	0.688678	0.309296	0.143579	-0.205681	0.621164	0.5128
EPB41L5	green	0.207276	-0.15137	-0.525709	0.0997217	-0.177348	-0.332014	-0.0274087	0.0894401	0.867929	0.825625	0.1774	0.164845	-0.24675	0.483858	0.494874
GPR75-ASB3	green	0.193663	-0.148414	-0.416737	0.0325854	-0.197037	-0.282152	-0.0431072	0.04373	0.758141	0.697253	0.216643	0.0600849	-0.205451	0.33528	0.353749
EFEMP1	green	0.26849	-0.352035	-0.550391	0.102668	-0.118242	-0.15721	0.0414267	0.222495	0.798804	0.632964	0.459806	0.249689	-0.227352	0.50115	0.322276
BCL9	green	0.212359	-0.404422	-0.611119	0.345569	0.150432	-0.108214	0.0468234	0.379849	0.758898	0.529829	0.336657	0.265844	-0.0666978	0.586995	0.407738
DOCK7	green	0.0820623	-0.145863	-0.386982	0.169006	-0.0543383	-0.234471	-0.161482	0.0967185	0.804428	0.814696	0.0632197	0.0507711	-0.282939	0.426152	0.376655
WLS	green	0.146578	-0.485885	-0.623313	0.254509	0.0360151	-0.0217668	0.181151	0.4373	0.890373	0.583774	0.363355	0.230132	-0.12472	0.670966	0.330829
PRDX6	green	0.162723	-0.452166	-0.59014	0.300536	0.0965826	-0.000633674	0.20745	0.441691	0.807338	0.492404	0.301941	0.186978	-0.117761	0.637493	0.299396
NEK6	green	0.0793259	-0.396424	-0.462163	0.35426	0.173544	0.0364012	0.0890626	0.408096	0.780608	0.620763	-0.0204104	0.00988434	-0.253469	0.645357	0.280658
HSDL2	green	0.149444	-0.199598	-0.56922	0.0266019	-0.250049	-0.294447	0.064815	0.13693	0.860067	0.711808	0.250829	0.225956	-0.104887	0.543562	0.461879
ALDH6A1	green	0.182688	-0.213629	-0.444979	0.145767	-0.066481	-0.198346	0.0385425	0.169693	0.878316	0.849866	0.06073	0.105563	-0.252674	0.443685	0.401464
GPAM	green	0.231053	-0.21741	-0.378694	0.04672	-0.110279	-0.225778	-0.0313873	0.0845292	0.827184	0.847014	0.102934	0.0946469	-0.311865	0.324014	0.31844
SERP1	green	0.0116236	-0.209559	-0.594138	0.55667	0.238179	-0.136682	0.103433	0.40831	0.761925	0.516062	0.0791586	0.0233812	-0.0302543	0.670177	0.521487
CLU	green	0.0264074	-0.576457	-0.458533	0.528163	0.408325	0.233881	0.24657	0.617091	0.790499	0.507889	0.00300396	-0.00468178	-0.187213	0.661684	0.155342
CAT	green	0.182529	-0.300624	-0.722304	0.299042	0.0153092	-0.227658	0.178439	0.359955	0.785915	0.462416	0.372756	0.391068	0.18997	0.655193	0.565081
TMEM54	green	0.210396	-0.657828	-0.640607	0.385139	0.303736	0.267756	0.583367	0.749192	0.702775	0.257949	0.343155	0.342449	-0.0566815	0.681785	0.211997
HERPUD2	green	0.132871	-0.241378	-0.408096	0.189385	0.0374955	-0.136367	0.104844	0.229733	0.73647	0.613211	0.0880707	0.0844687	-0.173267	0.384695	0.322008
FKBP9	green	0.107117	-0.372125	-0.529727	0.16588	-0.0696636	-0.143671	0.0203849	0.229926	0.763656	0.591292	0.326437	0.232468	-0.230329	0.57578	0.293314
CNTFR	green	0.0622656	-0.530861	-0.308049	0.231474	0.214621	0.257389	0.211404	0.457323	0.721521	0.569005	0.171029	0.0318411	-0.28521	0.381097	0.0357208
ACADS	green	0.14836	-0.5716	-0.464831	0.0102257	-0.038265	0.190265	0.369265	0.455748	0.715888	0.401056	0.258215	0.174924	-0.0985524	0.509301	0.0380914
HVCN1	green	0.0979171	-0.514842	-0.619661	0.408772	0.283233	0.0723425	0.333678	0.585154	0.794843	0.424587	0.17802	0.302395	0.0195255	0.687587	0.360206
SARDH	green	0.204818	-0.575552	-0.35432	0.0731248	0.0627124	0.215516	0.350476	0.454025	0.761692	0.562628	0.102009	0.105789	-0.241146	0.447983	0.0395485
SLC12A4	green	0.251588	-0.504593	-0.666052	0.288705	0.109008	0.00118131	0.235107	0.474586	0.736679	0.407746	0.509085	0.393542	-0.0341729	0.652325	0.350647
RREB1	green	0.293019	-0.379261	-0.834231	0.314002	-0.0371336	-0.213633	0.205401	0.397104	0.818533	0.434439	0.553797	0.424893	-0.00302745	0.768768	0.553094
AHNAK	green	0.333773	-0.230153	-0.660244	0.0524427	-0.190645	-0.257461	0.168472	0.213127	0.709471	0.450261	0.44833	0.435987	-0.00722496	0.524565	0.476863
SOX21	green	0.193701	-0.204873	-0.488366	0.26081	0.0443581	-0.234278	-0.0625614	0.174597	0.780275	0.713702	0.286599	0.182347	-0.199413	0.422046	0.452067
SOX9	green	0.19749	-0.426508	-0.649493	0.370429	0.128941	-0.0526318	0.127122	0.441713	0.87006	0.578913	0.39961	0.114921	-0.1024	0.630571	0.416046
PSD4	green	0.314864	-0.574223	-0.550801	0.0739796	0.00170152	0.0530697	0.341227	0.427552	0.797905	0.548834	0.313687	0.375608	-0.166291	0.508412	0.177371
MGME1	green	0.287981	-0.291921	-0.598815	0.0296243	-0.171177	-0.251188	0.201932	0.218076	0.699129	0.432009	0.380641	0.463661	0.110833	0.47735	0.41614
AMOT	green	0.241152	-0.207599	-0.509144	0.0550205	-0.187991	-0.293453	0.0197116	0.100324	0.852821	0.818673	0.229496	0.27588	-0.204692	0.433983	0.448988
RHOJ	green	0.218773	-0.363487	-0.471171	0.130155	-0.0557175	-0.163904	0.148786	0.207606	0.733862	0.633688	0.119482	0.224668	-0.301153	0.468143	0.265429
ATP13A4	green	0.211734	-0.166163	-0.251654	-0.113846	-0.250249	-0.231241	-0.0778959	-0.0545012	0.766852	0.880159	0.097242	0.0834658	-0.357603	0.196811	0.215583
SMO	green	0.284719	-0.528154	-0.736737	0.424762	0.208499	-0.00532281	0.246252	0.559713	0.87596	0.492036	0.489346	0.267067	-0.124352	0.715375	0.405609
FEZF1	green	0.209041	-0.354814	-0.43659	0.0837419	-0.0674552	-0.0364463	0.0827126	0.234245	0.710749	0.559701	0.368326	0.0891975	-0.314213	0.3916	0.176746
CGNL1	green	0.237174	-0.384744	-0.680847	0.255822	0.0227069	-0.142159	0.208821	0.381996	0.788607	0.504306	0.356447	0.47156	-0.100839	0.654896	0.465122
PALLD	green	0.099198	-0.280761	-0.645857	0.603551	0.325469	-0.110658	0.105477	0.471721	0.787221	0.51003	0.0716885	0.0679169	-0.0366445	0.729624	0.563975
BBOX1	green	0.331727	-0.462558	-0.686856	0.1096	-0.0893713	-0.116093	0.240243	0.378649	0.805404	0.468244	0.505995	0.397669	-0.0378269	0.622523	0.383671
ATP1B2	green	0.0387957	-0.483435	-0.242645	0.284511	0.228074	0.145673	0.0819796	0.356378	0.760047	0.722747	-0.14622	-0.114426	-0.382395	0.441866	0.0332328
MMP28	green	0.237373	-0.540486	-0.358261	-0.0431498	-0.0476706	0.148805	0.283105	0.357996	0.777828	0.609073	0.175925	0.0961905	-0.313478	0.368601	0.00515556
SLC44A2	green	0.167264	-0.502569	-0.499956	0.0912258	-0.0352433	0.0368125	0.273793	0.392397	0.856213	0.617087	0.178227	0.173169	-0.183365	0.574036	0.193677
ARHGEF6	green	0.26231	-0.310931	-0.673498	0.154249	-0.0823347	-0.247104	0.200703	0.291606	0.867731	0.632701	0.332124	0.450626	-0.00859557	0.60401	0.52805
GDPD2	green	0.197446	-0.542693	-0.477774	0.332493	0.268605	0.185541	0.326581	0.559514	0.71757	0.440845	0.192658	0.178406	-0.15224	0.506188	0.154756
APOE	green	0.202287	-0.69451	-0.431779	0.30818	0.282453	0.371612	0.409682	0.64446	0.77714	0.530963	0.141077	0.107165	-0.27759	0.56522	0.0187034
RGN	green	0.335627	-0.446996	-0.468924	0.04788	-0.114483	-0.0360474	0.212641	0.27099	0.747101	0.573944	0.306043	0.242064	-0.135165	0.4276	0.162245
NFATC1	green	0.293329	-0.480423	-0.80543	0.368499	0.0839393	-0.0571667	0.276294	0.533998	0.734041	0.266449	0.582419	0.391175	0.145198	0.7576	0.449235
HRSP12	green	0.176039	-0.32748	-0.427617	0.0521844	-0.0650863	-0.0505877	0.255742	0.281844	0.734482	0.528687	0.0959838	0.155512	-0.142095	0.437269	0.211704
MTSS1L	green	0.316038	-0.458307	-0.620577	0.371635	0.213505	-0.00338618	0.302684	0.480823	0.732487	0.481044	0.391958	0.402813	-0.0427199	0.557129	0.405548
RIN2	green	0.298702	-0.212261	-0.72304	0.229124	-0.0615752	-0.326517	0.120743	0.244252	0.786213	0.53558	0.364285	0.444017	0.0554746	0.619962	0.605396
BCAN	green	0.257067	-0.495861	-0.370107	0.300844	0.216598	0.102488	0.278833	0.400866	0.746299	0.657237	0.0835068	0.163648	-0.241178	0.3987	0.16353
LPIN3	green	0.0853194	-0.518012	-0.455388	0.288243	0.236123	0.162392	0.217403	0.501756	0.785361	0.525254	0.187289	0.0605656	-0.232561	0.515352	0.145399
PPP1R3D	green	0.0564917	-0.239946	-0.519929	0.627341	0.370969	-0.1216	0.0495996	0.405607	0.77865	0.59486	-0.0212132	0.0461267	-0.0334723	0.608742	0.51222
BHMT2	green	0.129453	-0.356047	-0.401212	0.0719385	-0.0297605	-0.0464998	0.043938	0.241817	0.774189	0.682263	0.105103	0.14579	-0.258108	0.426996	0.201761
SLC41A1	green	0.159084	-0.230145	-0.574836	0.368009	0.0911808	-0.193219	-0.0382385	0.260529	0.763416	0.600435	0.33582	0.118641	-0.140269	0.564053	0.45154
C14orf159	green	0.174581	-0.577749	-0.262757	0.277594	0.271996	0.254586	0.238576	0.430712	0.728513	0.630964	0.199667	0.00367667	-0.467353	0.331095	-0.0390881
MRO	green	0.175578	-0.0801088	-0.403299	-0.0585462	-0.253974	-0.288795	-0.056894	0.00512996	0.71344	0.721818	0.215845	0.237418	-0.123132	0.310828	0.418748
NOTCH2	green	0.161337	-0.250965	-0.477555	0.278053	0.0315359	-0.203418	-0.0810651	0.19327	0.896331	0.861487	0.0990702	0.0296803	-0.280754	0.511871	0.412086
CABLES1	green	0.190925	-0.321474	-0.263909	-0.00843051	-0.0619648	-0.0377882	0.137088	0.162901	0.780148	0.782126	-0.00540528	0.066872	-0.395599	0.267898	0.120757
SOX5	green	0.245009	-0.142927	-0.610657	0.105087	-0.219279	-0.418183	-0.0938626	0.0562657	0.831365	0.728407	0.421287	0.237241	-0.13698	0.478941	0.562893
LRP4	green	0.16106	-0.355133	-0.547844	0.472166	0.292503	-0.0626963	0.145514	0.434683	0.822142	0.63133	0.000526346	0.174296	-0.00507224	0.619887	0.447752
FADS2	green	0.221263	-0.576533	-0.635712	0.266144	0.103987	0.0545598	0.339829	0.530308	0.842305	0.51633	0.245951	0.318997	-0.1451	0.715738	0.284187
CLDN10	green	0.115652	-0.4136	-0.371766	0.358118	0.205356	0.0399366	0.0774818	0.356268	0.803599	0.724015	0.000707206	0.00558862	-0.284628	0.496424	0.224024
ITGA7	green	0.110623	-0.472909	-0.316819	0.261726	0.240278	0.188503	0.192321	0.412923	0.735401	0.621905	-0.002818	-0.0270944	-0.399727	0.424762	0.0439909
NHSL1	green	0.281716	-0.451856	-0.523823	0.188274	0.0228282	-0.0901825	0.128218	0.304834	0.900192	0.775622	0.276669	0.21168	-0.276553	0.474448	0.311414
ITM2C	green	0.111689	-0.618683	-0.229595	0.231902	0.269561	0.306104	0.289043	0.484967	0.753173	0.65318	-0.0906823	-0.00769869	-0.418992	0.396088	-0.0881897
SERPINE2	green	0.121978	-0.319554	-0.311176	0.234146	0.0449916	-0.0424096	-0.0590598	0.195482	0.768006	0.758584	0.0184803	-0.125139	-0.369137	0.421999	0.172872
APPL2	green	0.243046	-0.185374	-0.581671	0.104275	-0.149521	-0.320596	0.0143255	0.142712	0.853957	0.731433	0.225845	0.265545	-0.0817829	0.500374	0.503148
LRRC8A	green	0.149431	-0.546585	-0.464252	0.288258	0.233862	0.18805	0.297357	0.545737	0.844246	0.588238	0.0904077	0.100204	-0.196371	0.582274	0.178612
TLR4	green	0.0630763	-0.162379	-0.604066	0.237015	-0.0492047	-0.31611	0.00504205	0.197355	0.835835	0.687449	0.220628	0.285781	-0.0805942	0.579296	0.577525
TUBB2B	green	0.0496772	-0.603737	-0.414638	0.372023	0.280156	0.26523	0.317647	0.583784	0.748088	0.495306	0.021974	-0.0480956	-0.229206	0.605108	0.0782113
PRCP	green	0.158881	-0.376412	-0.626826	0.202579	-0.0384386	-0.109866	0.135095	0.349764	0.760633	0.434494	0.443304	0.259494	-0.0257824	0.63373	0.349169
YAP1	green	0.198702	-0.225348	-0.816997	0.40009	0.0111214	-0.32588	0.0399905	0.335321	0.847143	0.514751	0.467947	0.321938	0.0281128	0.776556	0.689039
BCAR3	green	0.126618	-0.416534	-0.54746	0.482805	0.307111	0.0287883	0.165708	0.489095	0.838377	0.585637	0.207329	0.126467	-0.141706	0.574983	0.364784
HADHB	green	0.151279	-0.27844	-0.531399	0.240058	-0.00692015	-0.177556	0.116021	0.261657	0.834486	0.690256	0.0944068	0.169358	-0.101467	0.57706	0.418919
DIRC2	green	0.0789912	-0.292569	-0.483266	0.106322	-0.119614	-0.142281	0.0479006	0.226686	0.761512	0.590463	0.159009	0.161811	-0.0358494	0.550464	0.31888
FGF2	green	0.0818355	-0.197032	-0.601941	0.462799	0.152995	-0.209078	-0.0172436	0.327734	0.794479	0.588629	0.0374279	0.0554642	-0.067499	0.71206	0.553616
BMPR1B	green	0.194129	-0.24512	-0.6253	0.295358	0.00442452	-0.259962	0.00174714	0.256775	0.889806	0.717884	0.265031	0.197833	-0.159822	0.612577	0.528221
HADH	green	0.116381	-0.444725	-0.481012	0.322993	0.189481	0.0572558	0.17768	0.432282	0.793749	0.55473	0.266673	0.0979807	-0.191262	0.49927	0.211346
SUOX	green	0.178063	-0.539445	-0.270933	0.359785	0.395255	0.234179	0.188428	0.473662	0.706484	0.605119	0.048224	0.0111172	-0.323655	0.350355	0.0532576
ITGB7	green	0.20302	-0.550225	-0.455291	0.181107	0.0878938	0.115884	0.210127	0.399755	0.68969	0.483782	0.338809	0.268808	-0.239128	0.432264	0.0989257
TMBIM6	green	0.170714	-0.315093	-0.693335	0.317355	-0.00049048	-0.217047	0.115386	0.342792	0.907745	0.650184	0.24865	0.208149	-0.0203135	0.720124	0.512008
GRTP1	green	0.24379	-0.456411	-0.666562	0.342941	0.160476	-0.0232001	0.168166	0.48736	0.782191	0.4396	0.42559	0.307897	-0.0604421	0.637414	0.374507
C14orf37	green	0.0950864	-0.135446	-0.442073	0.0870304	-0.140541	-0.25447	-0.128766	0.0956544	0.751272	0.706392	0.247015	0.184761	-0.196089	0.431117	0.416531
STON2	green	0.279417	-0.456755	-0.664976	0.131615	-0.101332	-0.13651	0.272466	0.354581	0.856293	0.534246	0.417292	0.341864	-0.157275	0.609245	0.344362
ETFA	green	0.0511291	-0.276754	-0.393287	0.19826	0.045871	0.00607613	0.151851	0.311353	0.722029	0.568934	0.00752823	0.054567	-0.18487	0.494776	0.214665
RHCG	green	0.13604	-0.477103	-0.541855	0.439121	0.309858	0.105653	0.316778	0.554721	0.773747	0.501413	0.213715	0.179473	-0.132852	0.569104	0.305156
IMPA2	green	0.131138	-0.556843	-0.569966	0.251835	0.139882	0.102342	0.354171	0.534695	0.833076	0.516354	0.116809	0.228188	-0.110516	0.686758	0.236066
ERBB2	green	0.19697	-0.576289	-0.620648	0.154202	0.0268637	0.135775	0.356223	0.544096	0.806965	0.404056	0.353574	0.218582	-0.129222	0.681706	0.194009
FKBP10	green	0.233602	-0.56132	-0.587236	0.421644	0.255123	0.094162	0.243919	0.540834	0.812108	0.5176	0.226414	0.147023	-0.201564	0.678878	0.245315
PRDM16	green	0.212667	-0.434774	-0.458256	0.0798126	-0.0457348	-0.0364113	0.121787	0.293917	0.896576	0.767055	0.135507	0.11271	-0.267424	0.492109	0.222176
SLC44A3	green	-0.0352224	-0.4353	-0.49438	0.478416	0.30395	0.117453	0.223657	0.535289	0.750085	0.487086	-0.0471878	0.0225931	-0.161714	0.706651	0.282248
GPR161	green	0.174502	-0.383051	-0.499432	0.130618	0.00595376	0.0297127	0.270897	0.39108	0.710862	0.490453	0.116895	0.201211	-0.0494081	0.559182	0.284137
ALDH9A1	green	0.19216	-0.283791	-0.578378	0.1243	-0.11281	-0.177678	0.133508	0.263797	0.85394	0.65855	0.296122	0.281094	-0.0994986	0.553867	0.407508
TMCO1	green	0.107073	-0.364871	-0.712862	0.336814	0.0370957	-0.0920096	0.233761	0.459204	0.748149	0.341846	0.377224	0.287466	0.0533905	0.75561	0.421964
ZNF687	green	0.251541	-0.441682	-0.44084	0.058346	-0.00319022	0.0470463	0.180524	0.338456	0.760769	0.606054	0.228905	0.22665	-0.179981	0.426389	0.19555
SELENBP1	green	0.212045	-0.567476	-0.435931	0.150877	0.0729883	0.104396	0.199837	0.396845	0.850355	0.667779	0.238115	0.16935	-0.30706	0.470068	0.105454
TP53BP2	green	0.163204	-0.3602	-0.584367	0.378628	0.153445	-0.112947	0.102559	0.394593	0.916601	0.715907	0.0893484	0.149338	-0.14391	0.655846	0.457835
EPHX1	green	0.113208	-0.541776	-0.568575	0.511143	0.357185	0.120147	0.303657	0.611704	0.864359	0.546933	0.0862537	0.0896566	-0.0696627	0.673737	0.302467
GALM	green	0.320552	-0.546514	-0.752103	0.344804	0.146023	-0.0449674	0.336393	0.529111	0.731976	0.316269	0.513557	0.495917	0.0672902	0.686141	0.382207
SFXN5	green	0.250204	-0.46465	-0.352858	0.13594	0.0198335	0.0408046	0.141149	0.27925	0.7864	0.757996	0.121737	0.0995569	-0.473312	0.408829	0.114203
TEX261	green	0.206532	-0.422493	-0.762259	0.451952	0.211135	-0.131606	0.275869	0.510103	0.700473	0.314807	0.276085	0.459935	0.185577	0.754809	0.524922
IL17RD	green	0.318099	-0.176805	-0.518049	-0.0647639	-0.291185	-0.318544	-0.0158498	0.0537316	0.802269	0.747033	0.261232	0.274451	-0.209477	0.426228	0.416589
LRIG1	green	0.131501	-0.316658	-0.518091	0.366844	0.149971	-0.0951399	0.0751921	0.35476	0.751606	0.579949	-0.0230766	0.0914906	-0.0810443	0.671767	0.403734
ALDH1L1	green	0.0479565	-0.562227	-0.343837	0.168298	0.149417	0.255953	0.319748	0.495674	0.741598	0.497455	-0.0376399	-0.0115352	-0.209599	0.508936	0.00171994
MYO10	green	0.261698	-0.190512	-0.616854	0.24808	-0.00410437	-0.310602	0.0597118	0.214163	0.816376	0.682732	0.227373	0.385936	0.0115082	0.53412	0.59474
LIX1	green	0.242584	-0.270902	-0.558296	0.00553253	-0.241034	-0.213441	0.138619	0.18488	0.779708	0.58685	0.296158	0.302798	-0.104803	0.534042	0.378408
CHST7	green	0.173327	-0.47662	-0.411696	0.228528	0.141075	0.0535298	0.180077	0.370635	0.730362	0.617548	0.168944	0.136322	-0.251306	0.435362	0.166112
RAB41	green	0.280558	-0.436368	-0.528018	0.290002	0.149695	-0.00997488	0.306502	0.417653	0.790069	0.547889	0.173425	0.293374	-0.179114	0.538952	0.28591
CSGALNACT1	green	0.214932	-0.164529	-0.486079	0.0744534	-0.175407	-0.248475	0.116417	0.130986	0.719495	0.59636	0.140766	0.21547	-0.12034	0.459267	0.374682
NTRK2	green	0.177612	-0.272951	-0.37711	0.0177035	-0.150013	-0.163137	-0.0174373	0.114973	0.844746	0.81791	0.178854	0.0914554	-0.274192	0.368497	0.260053
STOM	green	0.119975	-0.402441	-0.618141	0.348229	0.123471	-0.0415003	0.235203	0.465469	0.860954	0.559487	0.0605201	0.159908	-0.068862	0.732783	0.398067
NACC2	green	0.199022	-0.42137	-0.616341	0.377143	0.210761	-0.0370817	0.224726	0.494288	0.82023	0.557492	0.124384	0.310982	0.00610349	0.687873	0.454778
PARD3	green	0.0876687	-0.272435	-0.454966	0.375051	0.226763	0.0105892	0.149023	0.391035	0.762232	0.576003	0.0905575	-0.0333136	-0.283547	0.499166	0.343652
GLUD1	green	0.242203	-0.250464	-0.398388	0.04662	-0.174629	-0.205117	0.0053035	0.091823	0.811921	0.798888	0.123244	0.0498831	-0.336848	0.40367	0.281401
EIF4EBP2	green	0.191314	-0.167434	-0.57749	0.132248	-0.136889	-0.324582	0.0792126	0.155478	0.855965	0.716965	0.155646	0.268479	-0.107567	0.540668	0.533007
TCF7L2	green	0.259739	-0.373236	-0.643563	0.341398	0.0663437	-0.143243	0.142921	0.373169	0.8302	0.554754	0.27064	0.121674	-0.0785749	0.657761	0.446492
PLCB3	green	0.335054	-0.54006	-0.628664	0.39355	0.261937	0.0406466	0.277568	0.531884	0.728494	0.414632	0.301918	0.335113	-0.0917121	0.641477	0.316828
SLC7A11	green	0.152656	-0.156058	-0.560772	0.338318	0.0211581	-0.279695	-0.107798	0.182483	0.815324	0.700308	0.302937	0.0707878	-0.227163	0.530401	0.505929
NPAS3	green	0.203873	-0.38653	-0.69753	0.347033	0.0578823	-0.141835	0.204632	0.420124	0.859467	0.54677	0.344943	0.231423	-0.0183233	0.695764	0.490053
PTPN14	green	0.21957	-0.197515	-0.753336	0.452771	0.0743242	-0.296711	0.0973998	0.328534	0.788638	0.505416	0.387321	0.335877	-0.0311057	0.72399	0.655491
SPARCL1	green	0.149107	-0.284008	-0.321128	0.069661	-0.082557	-0.108997	-0.000204364	0.135318	0.824996	0.818237	-0.00337978	-0.0157248	-0.322912	0.386233	0.19928
NADK2	green	0.288976	-0.206596	-0.607296	0.102408	-0.184553	-0.328783	-0.0363723	0.127133	0.825837	0.669094	0.48097	0.247782	-0.167644	0.468404	0.467921
GJA1	green	0.240069	-0.370589	-0.569642	0.201273	0.0538168	-0.0992117	0.153824	0.356761	0.887446	0.681145	0.301316	0.279514	-0.11201	0.50376	0.391147
FARP1	green	0.136821	-0.527545	-0.512349	0.492529	0.386131	0.117365	0.341786	0.584356	0.814419	0.563723	-0.0225478	0.134021	-0.168908	0.633381	0.285828
GPR125	green	0.273947	-0.348128	-0.533566	0.304337	0.0613199	-0.170608	0.00244732	0.250568	0.853982	0.731156	0.358746	0.122938	-0.264609	0.496466	0.374389
C16orf89	green	0.0922097	-0.504313	-0.375175	0.262473	0.168191	0.129827	0.187132	0.41345	0.847886	0.713061	0.0889331	0.0143533	-0.375306	0.481292	0.107867
KCTD15	green	0.207982	-0.362582	-0.56031	0.426294	0.228864	-0.0428221	0.144679	0.401908	0.731235	0.518172	0.393017	0.131724	-0.252845	0.513681	0.358682
LGI4	green	0.154471	-0.662861	-0.463638	0.192783	0.179327	0.292428	0.428298	0.60969	0.770061	0.427936	0.154974	0.100046	-0.210255	0.576811	0.0223064
DDAH1	green	0.213103	-0.318877	-0.50897	0.216677	-0.0300402	-0.195012	-0.00402532	0.215002	0.900904	0.815797	0.197658	0.0880165	-0.281817	0.509181	0.367478
MSI2	green	0.279096	-0.205328	-0.665977	0.164555	-0.17571	-0.355398	-0.0105151	0.147756	0.873508	0.698399	0.476839	0.216252	-0.157153	0.555398	0.54113
PITPNC1	green	0.0264937	-0.136467	-0.28395	0.313656	0.106309	-0.133058	-0.143214	0.144261	0.739686	0.795567	-0.0557157	-0.126793	-0.443647	0.416437	0.302492
PRKCA	green	0.160454	-0.242698	-0.430962	0.220978	0.0165223	-0.180844	-0.0234103	0.194999	0.803495	0.766271	0.110591	0.113832	-0.270612	0.463118	0.392199
DISP1	green	0.237882	-0.394149	-0.469506	0.17869	0.0655827	-0.0578702	0.214183	0.318137	0.784517	0.622783	0.171145	0.183886	-0.28873	0.41835	0.262365
TNIK	green	0.243688	-0.158091	-0.392462	0.025525	-0.180989	-0.280564	-0.105554	0.0177152	0.795217	0.826773	0.20401	0.157101	-0.281631	0.299232	0.35876
FAM167A	green	0.200303	-0.310606	-0.454482	0.245148	0.0434765	-0.132488	0.0118681	0.22069	0.745978	0.652841	0.261677	0.152287	-0.280626	0.44428	0.299961
PDLIM3	green	0.345331	-0.339581	-0.614341	0.254187	0.01354	-0.201088	0.119878	0.272236	0.684408	0.462668	0.440547	0.235434	-9.252e-05	0.493434	0.421809
APCDD1	green	0.22463	-0.316613	-0.576803	0.0247983	-0.161014	-0.212957	0.0925329	0.208564	0.807402	0.607745	0.339726	0.327916	-0.053571	0.490662	0.38255
ACSS1	green	0.242794	-0.444336	-0.373201	0.00568012	-0.0485667	0.0275208	0.187519	0.262384	0.785648	0.670493	0.235699	0.219368	-0.266185	0.343216	0.100235
VOPP1	green	0.112106	-0.427766	-0.689036	0.432482	0.146798	-0.0663523	0.16265	0.462373	0.708716	0.346836	0.405482	0.23051	-0.0905223	0.717326	0.359539
CYP2U1	green	0.139915	-0.0743942	-0.515609	0.0355492	-0.209134	-0.382026	-0.0894501	0.052379	0.705957	0.596359	0.326044	0.339167	-0.0390829	0.425984	0.52411
GRAMD3	green	0.187095	-0.270311	-0.637172	0.121619	-0.149632	-0.23231	0.0795683	0.229892	0.805485	0.549652	0.516253	0.251512	-0.00985081	0.544051	0.452422
FZD7	green	0.184353	-0.261021	-0.451427	0.177834	0.0214541	-0.122899	-0.0893523	0.229674	0.745685	0.666116	0.23184	0.173005	-0.253041	0.438659	0.334598
FMN2	green	-0.0661658	-0.181838	-0.235762	0.235833	0.0767091	-0.081316	-0.153727	0.140411	0.743516	0.814772	-0.122174	-0.0839145	-0.423715	0.399209	0.239397
ADCY8	green	0.278908	-0.509084	-0.480188	0.164544	0.044286	0.0331284	0.195408	0.370859	0.751309	0.563758	0.339619	0.322914	-0.208235	0.474713	0.19722
CPT2	green	0.108524	-0.500459	-0.527426	0.138816	0.0356515	0.0790415	0.262283	0.46563	0.78624	0.479747	0.146527	0.210318	-0.0368943	0.614122	0.215495
GAREML	green	0.315215	-0.319783	-0.384149	0.238065	0.1292	-0.0963805	0.0277198	0.220951	0.714099	0.705301	0.135172	0.158549	-0.289871	0.352118	0.275207
ABHD3	green	0.0594058	-0.208203	-0.62987	0.732439	0.375953	-0.187883	0.0287602	0.420965	0.736914	0.484861	0.0951591	0.0813362	0.0128501	0.700932	0.588419
AHCYL2	green	0.224155	-0.0613663	-0.376973	0.147203	-0.0625945	-0.34748	-0.156224	0.00686166	0.758389	0.809954	0.0821287	0.128506	-0.197798	0.313843	0.45105
ALDH4A1	green	0.0754739	-0.577455	-0.406264	0.308726	0.254836	0.250035	0.297753	0.553419	0.80233	0.587106	-0.0103634	0.0227753	-0.28322	0.5669	0.0911918
AGPAT3	green	-0.0347685	-0.290268	-0.484657	0.248306	0.0463227	-0.0281989	0.0917714	0.332579	0.756542	0.599115	0.134228	0.160145	-0.143683	0.595183	0.326284
GRIN2C	green	0.114866	-0.492113	-0.317375	0.28291	0.223106	0.158809	0.163547	0.415882	0.779543	0.688081	-0.0586575	-0.0779285	-0.372604	0.474608	0.0886431
ACOX1	green	0.056156	-0.253584	-0.400373	0.237334	0.0186952	-0.0903392	0.00930415	0.240248	0.787693	0.696444	-0.0632086	-0.0938353	-0.292471	0.551153	0.292991
TNFSF13	green	0.204219	-0.575517	-0.470279	0.271755	0.180277	0.138983	0.322777	0.494958	0.851841	0.631538	0.124067	0.111145	-0.285786	0.558267	0.142759
FGF11	green	0.129064	-0.403927	-0.552737	0.479864	0.27976	-0.0399911	0.182235	0.454243	0.714333	0.451394	0.0506919	0.147835	-0.0106	0.658941	0.389585
LRP5	green	0.229033	-0.576651	-0.665286	0.510034	0.357066	0.0722677	0.277685	0.619163	0.820338	0.47564	0.380488	0.302259	-0.0570568	0.690518	0.370492
ACOT11	green	0.285373	-0.456651	-0.404882	0.00410311	-0.0876276	0.00223323	0.0703887	0.230065	0.681618	0.545187	0.52546	0.21084	-0.246271	0.31654	0.115334
PPAP2B	green	0.196261	-0.267197	-0.44871	0.127825	-0.0690836	-0.173009	-0.0244519	0.170278	0.882717	0.855758	0.163445	0.111306	-0.229871	0.441617	0.352965
SEPN1	green	0.205813	-0.457581	-0.624602	0.335953	0.157209	-0.00737264	0.238417	0.48152	0.85743	0.609358	0.15871	0.210091	-0.213995	0.698773	0.374506
DHRS3	green	0.233356	-0.580722	-0.669801	0.337817	0.194933	0.106323	0.403717	0.603745	0.78512	0.354137	0.411755	0.326222	-0.0646263	0.649334	0.284903
SDC3	green	0.188797	-0.470615	-0.199825	0.0588723	0.0681513	0.129058	0.150426	0.265624	0.688521	0.695338	-0.0142014	-0.0261	-0.447957	0.276768	-0.0251497
NFIA	green	0.277609	-0.359785	-0.754285	0.325143	0.0240128	-0.254598	0.21693	0.374009	0.866212	0.555386	0.339915	0.367859	0.0459272	0.709264	0.587436
PEA15	green	0.244283	-0.384366	-0.555225	0.320854	0.088722	-0.115362	0.281467	0.34467	0.739111	0.578355	0.152232	0.285369	-0.102905	0.585392	0.383687
VANGL2	green	0.36626	-0.317562	-0.580167	0.00560616	-0.189013	-0.186971	0.120271	0.214398	0.758082	0.535288	0.424708	0.29226	-0.0203792	0.474095	0.367526
CAPN2	green	0.133615	-0.143972	-0.527391	0.233428	-0.0224537	-0.22738	-0.0560728	0.177314	0.785329	0.662194	0.142872	0.0641855	-0.133752	0.52399	0.440976
INHBB	green	0.222427	-0.531162	-0.661287	0.261817	0.0818354	-0.00959806	0.192071	0.472018	0.928314	0.637385	0.333771	0.266156	-0.205205	0.684488	0.326393
PDLIM5	green	0.239037	-0.12119	-0.655792	0.246265	-0.0994209	-0.402809	-0.0633179	0.141461	0.854737	0.744728	0.293622	0.27596	-0.0858188	0.577497	0.646105
GABRG1	green	0.209689	-0.168313	-0.627149	0.112728	-0.17423	-0.32973	-0.0135441	0.148491	0.847259	0.665249	0.457239	0.248156	-0.104666	0.511125	0.529458
PBXIP1	green	0.25558	-0.611746	-0.49083	0.176151	0.0839411	0.144781	0.266349	0.475862	0.905938	0.665491	0.292322	0.135034	-0.329201	0.531518	0.109142
NBPF10	green	0.237018	-0.294857	-0.68506	0.398757	0.0711765	-0.219323	0.179047	0.336584	0.775179	0.498938	0.257075	0.168832	-0.11834	0.661039	0.494016
SLC15A2	green	0.341509	-0.175033	-0.345651	-0.0406744	-0.195417	-0.260768	-0.11084	-0.008749	0.766003	0.840412	0.243493	0.200134	-0.300851	0.213261	0.294183
PLXNB1	green	0.319757	-0.430383	-0.720892	0.244132	0.0491837	-0.1009	0.218552	0.438338	0.76659	0.432571	0.436768	0.432379	0.174288	0.640288	0.448414
FBXO8	green	0.217918	-0.2443	-0.779398	0.431876	0.105174	-0.293292	0.176555	0.389907	0.775039	0.410461	0.338892	0.345689	0.191667	0.723281	0.665914
FAM198B	green	0.225889	-0.106247	-0.600302	0.045856	-0.248303	-0.42454	-0.0635976	0.0499408	0.742315	0.612226	0.487285	0.399638	0.048824	0.440169	0.567014
RANBP3L	green	0.1143	-0.0363668	-0.303043	0.0509891	-0.102189	-0.298122	-0.166961	-0.0184495	0.749184	0.83738	0.0226479	0.0451439	-0.197606	0.251916	0.402315
GPR98	green	0.231626	-0.197558	-0.27984	0.0040389	-0.13147	-0.189853	-0.110346	0.0206792	0.768074	0.883677	0.0861321	0.0794223	-0.471129	0.231585	0.223259
RHOBTB3	green	0.0937588	-0.1682	-0.624099	0.239719	-0.0550244	-0.282964	0.0609709	0.247083	0.818601	0.606087	0.104074	0.1819	0.0545408	0.646839	0.576679
ALDH7A1	green	0.049993	-0.28072	-0.404713	-0.0499115	-0.221534	-0.107685	0.125996	0.157839	0.734975	0.610973	0.175635	0.109968	-0.200961	0.425903	0.208778
KIAA1161	green	0.181426	-0.347333	-0.245277	0.236588	0.146354	-0.0269265	0.00240808	0.195692	0.718011	0.781423	0.0416598	-0.0383621	-0.362154	0.257229	0.141421
SLC16A9	green	0.280379	-0.299709	-0.640321	0.210026	-0.0359939	-0.166654	0.0943443	0.301047	0.793123	0.500453	0.551167	0.221515	-0.0787696	0.519515	0.426074
HEPACAM	green	0.206252	-0.343945	-0.536244	0.124544	-0.0425356	-0.128112	0.196817	0.29707	0.81355	0.620199	0.19455	0.27298	0.0426703	0.512763	0.38119
VSTM4	green	0.155836	-0.246358	-0.5359	0.0930359	-0.108246	-0.278189	0.117964	0.172866	0.744805	0.611634	0.191466	0.341299	0.00202442	0.50765	0.448278
STOX1	green	0.210285	-0.330005	-0.565077	0.261271	0.0443755	-0.14078	0.143054	0.331273	0.902271	0.704165	0.181458	0.188191	-0.191339	0.566686	0.409563
NDRG2	green	0.220149	-0.509049	-0.646296	0.214247	0.00450416	-0.00626253	0.400234	0.466312	0.857884	0.557336	0.31171	0.323385	-0.0681003	0.650906	0.342102
ARHGEF40	green	0.259433	-0.350592	-0.708892	0.276244	0.00360763	-0.207258	0.135206	0.338547	0.769011	0.540974	0.312024	0.428368	0.0495934	0.684355	0.517878
HTRA1	green	0.20795	-0.430753	-0.406427	0.153564	0.0440515	0.0403425	0.169678	0.330007	0.763636	0.621886	0.0443196	0.106825	-0.160891	0.479247	0.155192
GPT2	green	0.195767	-0.536794	-0.5131	0.334929	0.225164	0.122047	0.233893	0.52789	0.848258	0.596467	0.0522962	0.144325	-0.217067	0.644845	0.233734
WBP1L	green	0.186446	-0.527334	-0.588159	0.380298	0.223033	0.0716611	0.376683	0.5506	0.786032	0.506128	0.0599966	0.285854	-0.145262	0.71531	0.312614
TPP1	green	0.134212	-0.310018	-0.414205	0.40111	0.273005	-0.0266696	0.131626	0.378744	0.768566	0.637868	-0.129602	0.0378872	-0.0701041	0.494629	0.322216
ST5	green	0.233218	-0.467858	-0.666049	0.343622	0.12264	-0.047962	0.161401	0.442952	0.877884	0.607272	0.397638	0.193361	-0.239521	0.671551	0.389311
KIF7	green	0.169235	-0.624591	-0.579188	0.5603	0.454383	0.23097	0.310943	0.683035	0.774692	0.442408	0.175366	0.102414	-0.193459	0.706563	0.24412
PEX11A	green	0.217116	-0.256672	-0.500722	0.102353	-0.063812	-0.194675	0.0969008	0.206742	0.816947	0.681114	0.246886	0.26918	-0.152458	0.437841	0.371048
TMEM170A	green	0.207567	-0.0552209	-0.697611	0.312394	-0.0352006	-0.441237	-0.0428561	0.179378	0.785389	0.599786	0.235783	0.27134	0.0875275	0.625629	0.730389
ACSF2	green	0.230709	-0.638528	-0.496383	0.123895	0.0599141	0.150207	0.343482	0.480626	0.859321	0.602945	0.30751	0.245645	-0.24196	0.515305	0.109323
TBC1D2B	green	0.17718	-0.286277	-0.574441	0.395901	0.207384	-0.0938148	0.154124	0.397873	0.706386	0.483515	0.156722	0.255601	-0.169083	0.60879	0.453377
ACAA2	green	0.263344	-0.460165	-0.661058	0.169866	-0.0689179	-0.0990748	0.28951	0.385934	0.902253	0.60725	0.32168	0.280226	-0.0935116	0.667108	0.357961
AXL	green	0.208584	-0.41279	-0.508284	0.327004	0.12461	-0.083119	0.071907	0.331678	0.858161	0.723487	0.115065	0.144412	-0.213623	0.575581	0.330514
TTYH1	green	0.185121	-0.551385	-0.326768	0.0464209	-0.00961022	0.178146	0.217962	0.354663	0.784884	0.673792	0.17416	0.0444683	-0.387596	0.387706	-0.0315909
PLIN4	green	0.134491	-0.490999	-0.486114	0.19882	0.10309	0.0620572	0.214647	0.413996	0.826081	0.600638	0.200218	0.0964869	-0.211711	0.509977	0.187993
RP11-25K19.1	green	0.253899	-0.39488	-0.504396	0.325884	0.174184	-0.0517866	0.215417	0.387186	0.755496	0.581029	0.210306	0.371565	-0.137838	0.485962	0.353878
ACOX2	green	0.224851	-0.507548	-0.557282	0.441717	0.274336	0.0456723	0.1924	0.496132	0.81121	0.564495	0.317605	0.273235	-0.251149	0.586326	0.306021
FAM107A	green	0.253044	-0.401811	-0.794488	0.206106	-0.0332368	-0.132516	0.400442	0.475741	0.753343	0.282262	0.373429	0.473259	0.205698	0.759698	0.497342
RAB31	green	0.201	-0.172903	-0.609295	0.151711	-0.175941	-0.344957	0.071928	0.141334	0.852843	0.718357	0.166806	0.239729	-0.110109	0.600655	0.541815
AHCYL1	green	0.154386	-0.381744	-0.456664	0.0406593	-0.0824415	-0.0306658	0.201276	0.305704	0.790786	0.562908	0.105857	0.147854	-0.13813	0.523591	0.22472
ABHD15	green	0.200809	-0.351644	-0.742357	0.126879	-0.113736	-0.223331	0.273719	0.334816	0.740146	0.351991	0.489722	0.458375	0.0808356	0.620502	0.460318
NTSR2	green	0.233761	-0.521951	-0.356484	0.212335	0.130328	0.151469	0.209779	0.392259	0.771824	0.661172	0.0841904	0.0168941	-0.412809	0.435973	0.0494751
CHST14	green	0.254833	-0.466395	-0.813266	0.278501	0.0378834	-0.108978	0.264736	0.493829	0.778317	0.349262	0.495623	0.461987	0.0902065	0.786279	0.487274
GPR37L1	green	0.250028	-0.553067	-0.412172	0.161347	0.0907028	0.0747267	0.180231	0.372505	0.859347	0.737927	0.23694	0.164502	-0.311436	0.421713	0.136232
CHRNB1	green	0.243218	-0.48049	-0.598334	0.367902	0.242226	0.0344997	0.292476	0.521003	0.739328	0.425013	0.16543	0.34319	-0.0543243	0.634076	0.319562
EMX2	green	0.166592	-0.497955	-0.572254	0.330039	0.197031	0.0752106	0.294699	0.524616	0.887342	0.603501	0.140822	0.185198	-0.182891	0.641943	0.303097
GPRC5C	green	0.194822	-0.484495	-0.486146	0.0418839	-0.0637699	0.0550336	0.293825	0.357902	0.753719	0.502612	0.366587	0.0841812	-0.232059	0.46162	0.143007
ADORA2B	green	0.213725	-0.405318	-0.387431	0.368044	0.235003	0.00635201	0.114094	0.369064	0.749529	0.651017	-0.0261738	0.0532452	-0.262925	0.496182	0.24682
CDH2	green	0.168695	-0.136935	-0.603371	0.242965	-0.0557598	-0.343496	-0.0841796	0.15905	0.831392	0.691471	0.42107	0.226335	-0.103723	0.498285	0.561651
S1PR1	green	0.185973	-0.307526	-0.549301	0.26649	0.0225675	-0.178422	0.0515709	0.259728	0.904857	0.812189	0.167133	0.152055	-0.268334	0.567319	0.419583
MTM1	green	0.164202	-0.0796433	-0.58968	0.065349	-0.21024	-0.372395	-0.00438391	0.101529	0.789116	0.635056	0.188208	0.233985	-0.0256024	0.529537	0.539281
ETFDH	green	0.0392976	-0.1937	-0.445073	0.281315	0.065152	-0.184344	0.0341562	0.233036	0.779352	0.662885	-0.0826329	0.0528537	-0.0933906	0.516997	0.409898
BCL2	green	0.262905	-0.266206	-0.619543	0.310676	0.0644942	-0.223296	0.103936	0.303017	0.866454	0.695618	0.17906	0.237426	-0.0925066	0.596391	0.546095
AQP4	green	0.0985835	-0.22313	-0.3863	0.154618	-0.0257989	-0.170419	-0.0547512	0.163513	0.816616	0.76991	0.0350255	0.038236	-0.186317	0.45305	0.326951
CYP4F11	green	0.135435	-0.388348	-0.352388	0.00923835	-0.0709282	0.0502962	0.102417	0.28891	0.719404	0.567138	0.0572525	0.0817928	-0.229696	0.464995	0.122544
ATPAF2	green	0.23112	-0.639287	-0.704552	0.443748	0.309702	0.182368	0.489247	0.723458	0.723056	0.245999	0.374856	0.400756	0.0826518	0.733679	0.303402
LAMB2	green	0.128679	-0.573616	-0.565712	0.34848	0.250834	0.152698	0.305202	0.558808	0.723758	0.40134	0.234765	0.308702	-0.147091	0.648075	0.210231
SUCLG2	green	0.161882	-0.201155	-0.6741	0.170714	-0.146903	-0.3124	0.0864739	0.214649	0.842609	0.626951	0.248475	0.285709	-0.0290273	0.647986	0.543167
GNG12	green	0.166313	-0.160049	-0.742232	0.343254	-0.0646352	-0.399483	-0.0623625	0.202432	0.837315	0.609259	0.404824	0.238012	0.00934933	0.686708	0.673116
IL17D	green	0.228631	-0.350834	-0.430474	-0.0822892	-0.177581	0.0145036	0.217521	0.256167	0.720595	0.566733	0.340638	0.268884	-0.312051	0.365799	0.160698
EFEMP2	green	0.267656	-0.631935	-0.707124	0.202714	0.0521065	0.107083	0.468152	0.592648	0.824956	0.408567	0.37951	0.406221	-0.116526	0.740743	0.250115
FUT10	green	0.118148	-0.237613	-0.387559	0.239332	0.0420726	-0.15422	-0.0875724	0.17343	0.795604	0.788182	0.122687	0.0425542	-0.344054	0.4049	0.329472
DAG1	green	0.153967	-0.422402	-0.48308	0.0987749	-0.0311242	-0.0339101	0.0673669	0.303584	0.892543	0.766201	0.265386	0.141837	-0.278167	0.503571	0.255665
VEGFB	green	0.261359	-0.604714	-0.670505	0.449236	0.314929	0.128134	0.514709	0.665689	0.72893	0.34719	0.263808	0.426063	-0.0628805	0.701981	0.314669
SNX33	green	0.1848	-0.488362	-0.633334	0.515808	0.315106	-0.0189358	0.209434	0.53069	0.889606	0.621528	0.176957	0.2022	-0.140335	0.707718	0.438583
GOLIM4	green	0.268628	-0.256843	-0.70689	0.23049	-0.069644	-0.309052	0.0333393	0.247047	0.886277	0.669235	0.418939	0.356981	-0.0599569	0.625476	0.57645
ZHX3	green	0.340257	-0.271731	-0.379935	-0.101489	-0.184293	-0.168769	0.0911374	0.0948346	0.751089	0.70398	0.318392	0.276263	-0.269107	0.238291	0.251495
CTBP2	green	0.197823	-0.338963	-0.775045	0.628814	0.309627	-0.167845	0.206178	0.51062	0.790542	0.422228	0.340429	0.318735	0.117992	0.746682	0.629514
TMEM9B	green	0.0500177	-0.0902495	-0.579322	0.205793	-0.108949	-0.295106	-0.0173009	0.177915	0.743636	0.545549	0.157517	0.131338	-0.0526991	0.598452	0.489002
C7orf10	green	0.324122	-0.37515	-0.536135	0.0171601	-0.177354	-0.115031	0.193377	0.236922	0.775599	0.578004	0.400541	0.295735	-0.174144	0.459474	0.261992
NR2F1	green	0.245669	-0.436571	-0.600853	0.32169	0.163141	-0.0614076	0.183289	0.408186	0.815736	0.597124	0.408679	0.3295	-0.200751	0.515794	0.372779
DMRTA1	green	0.132975	-0.157017	-0.53183	0.287675	0.0272739	-0.246349	-0.0880191	0.189718	0.714851	0.576425	0.30834	0.167512	-0.0697328	0.451631	0.45725
PXMP2	green	0.141551	-0.591245	-0.568355	0.48304	0.390478	0.2067	0.415394	0.669591	0.745797	0.396214	0.240325	0.266073	-0.0973557	0.644271	0.220932
FIBIN	green	0.188134	-0.329103	-0.29606	-0.0260019	-0.0973753	-0.0545206	0.0267972	0.138096	0.704472	0.69186	0.14455	0.128688	-0.37102	0.321828	0.121758
SIX5	green	0.263637	-0.587457	-0.622754	0.402709	0.25896	0.120913	0.278419	0.5762	0.762602	0.398132	0.468598	0.153139	-0.188233	0.618294	0.225947
CASKIN2	green	0.162325	-0.566434	-0.472292	0.251838	0.151431	0.178274	0.263629	0.49394	0.775588	0.546308	0.186581	0.0646731	-0.186073	0.564832	0.139167
GRAMD1C	green	0.227216	-0.129518	-0.460129	0.0188191	-0.170089	-0.275112	-0.0111348	0.0978335	0.790218	0.690123	0.162738	0.170761	-0.160855	0.386481	0.413894
GLDC	green	0.221653	-0.373346	-0.412564	0.190356	0.0132089	-0.048308	0.0237149	0.251093	0.846184	0.789513	0.0947717	0.0228563	-0.376612	0.47714	0.229059
SLC25A20	green	0.138605	-0.497963	-0.586094	0.316024	0.141498	0.012865	0.267639	0.481696	0.913567	0.649538	0.148819	0.20486	-0.130925	0.664802	0.320467
CA8	green	0.177416	-0.328811	-0.46905	0.30832	0.151097	-0.0912876	0.0854805	0.324682	0.861014	0.747914	-0.00111073	0.0945972	-0.234435	0.519064	0.35297
CDC42EP4	green	0.20215	-0.49686	-0.612062	0.47731	0.244911	0.0137418	0.145552	0.492778	0.806995	0.521468	0.313419	0.116008	-0.185801	0.682405	0.337166
FGD6	green	0.174971	-0.0651942	-0.461868	0.231552	-0.062174	-0.394812	-0.145752	0.0231383	0.779758	0.808853	0.181427	0.147917	-0.273157	0.395526	0.517105
WDFY3-AS2	green	0.149391	0.0185876	-0.409377	0.00936729	-0.2589	-0.380948	-0.135261	-0.0414039	0.733357	0.749758	0.166066	0.145961	-0.146275	0.331893	0.484712
DHTKD1	green	0.204519	-0.307283	-0.478047	-0.0684996	-0.250362	-0.188768	0.107809	0.150272	0.831102	0.735098	0.202772	0.268684	-0.14633	0.444969	0.31629
TMEM132C	green	0.0107479	-0.368845	-0.398651	0.323711	0.192532	0.0235338	0.12507	0.369886	0.761279	0.666174	-0.115384	0.107116	-0.191842	0.540211	0.2579
SOX2	green	0.261137	-0.432935	-0.60176	0.332463	0.136047	-0.0458697	0.158315	0.413001	0.82024	0.563683	0.473802	0.166499	-0.144719	0.527908	0.363115
HHIPL1	green	0.269893	-0.523418	-0.246311	0.0641521	0.103796	0.178561	0.170612	0.330104	0.696608	0.675763	0.150829	0.156648	-0.507837	0.260726	-0.0181443
SLC25A18	green	0.192914	-0.439955	-0.43976	0.176734	0.0511923	0.0269661	0.239922	0.357575	0.846425	0.701344	0.095188	0.17401	-0.271355	0.480788	0.211388
CADM1	green	0.194534	-0.119225	-0.449506	0.26521	0.0374467	-0.292429	-0.120947	0.121509	0.775638	0.766223	0.102451	0.030027	-0.162867	0.405596	0.469012
FBXL7	green	0.149644	-0.238175	-0.641989	0.486609	0.199821	-0.229815	0.0595807	0.348581	0.72628	0.50343	0.136358	0.247133	0.180106	0.654788	0.58839
AIFM3	green	0.282172	-0.648255	-0.456129	0.294609	0.247369	0.221428	0.346212	0.553448	0.796607	0.594796	0.139074	0.248901	-0.320739	0.534292	0.10184
ZNF703	green	0.200037	-0.539413	-0.625856	0.416641	0.245603	0.094036	0.24798	0.566339	0.861292	0.574503	0.208115	0.198601	-0.223492	0.712179	0.314693
OAF	green	0.00344716	-0.389246	-0.40375	0.427839	0.257141	0.0280769	0.0887354	0.384931	0.740407	0.62335	-0.0145467	0.01852	-0.250101	0.539669	0.229396
MAML2	green	0.222182	-0.157708	-0.820935	0.291462	-0.125369	-0.454129	0.0438536	0.201171	0.758252	0.485324	0.502608	0.465074	0.158157	0.696217	0.740815
SEMA4B	green	0.152189	-0.553364	-0.352488	0.293982	0.256863	0.247264	0.249264	0.510795	0.779307	0.583922	-0.0696788	-0.049273	-0.323051	0.537183	0.0427733
METTL7A	green	0.191796	-0.406272	-0.499901	0.165681	0.040132	-0.0408629	0.148193	0.351831	0.897593	0.70982	0.214578	0.187824	-0.165742	0.506993	0.297916
KLHDC8B	green	0.260592	-0.605531	-0.661782	0.346478	0.230634	0.0985081	0.462245	0.603076	0.739969	0.334527	0.372896	0.391763	-0.0957898	0.641536	0.272622
2019-03-01	green	0.0984604	-0.316584	-0.31162	0.118237	-0.0215611	-0.074362	0.0220468	0.150887	0.7333	0.744484	0.16872	0.0824311	-0.354894	0.285558	0.160916
RXRA	green	0.24459	-0.584825	-0.657877	0.360918	0.248939	0.108694	0.375213	0.626227	0.889132	0.523787	0.276348	0.316103	-0.084505	0.692558	0.340223
PPARA	green	0.240183	-0.180448	-0.600012	0.319063	0.0536959	-0.307713	0.0170368	0.220935	0.856283	0.748204	0.231564	0.243538	-0.0730119	0.525676	0.59297
TEAD1	green	0.202305	-0.110456	-0.731881	0.236702	-0.161341	-0.454804	-0.0766138	0.134276	0.819224	0.606153	0.488375	0.313848	0.0500858	0.618393	0.699335
PLCD1	green	0.0511455	-0.589628	-0.55703	0.368357	0.247194	0.203628	0.339462	0.619936	0.798938	0.428763	0.10901	0.0849025	-0.105955	0.713226	0.190329
LYPD6	green	0.250484	-0.220526	-0.383622	-0.0497145	-0.184084	-0.224215	0.0350248	0.062761	0.718254	0.678197	0.304654	0.270442	-0.251499	0.237772	0.298739
BCAM	green	0.178699	-0.480934	-0.615647	0.37586	0.228837	0.024442	0.349607	0.529648	0.704958	0.376988	0.264483	0.419793	-0.0542632	0.653181	0.350204
NWD1	green	0.286577	-0.287301	-0.485469	0.118739	-0.0338694	-0.190012	0.053096	0.180832	0.687877	0.569432	0.438832	0.321661	-0.161471	0.334374	0.343732
PRELP	green	0.294717	-0.310446	-0.39502	0.129953	0.0292919	-0.114002	0.126492	0.203784	0.709065	0.64443	0.195972	0.195707	-0.262241	0.314313	0.258557
MAOA	green	0.150371	-0.300401	-0.517844	0.188405	0.00671331	-0.144135	0.141138	0.289358	0.848031	0.672092	0.0644175	0.133829	-0.155462	0.544319	0.380953
AKR1C3	green	0.177527	-0.474551	-0.639716	0.430816	0.244881	-0.00655665	0.224886	0.523362	0.799395	0.474001	0.26231	0.246858	-0.0673655	0.679066	0.400511
PPP1R26	green	0.254222	-0.435497	-0.35043	0.200557	0.129821	0.0880617	0.20106	0.338926	0.697826	0.639207	0.195627	0.167193	-0.431797	0.361206	0.140648
PLXNB2	green	0.253742	-0.613526	-0.706311	0.259978	0.115245	0.12704	0.358776	0.592612	0.807848	0.409961	0.495411	0.327141	-0.126167	0.703965	0.263371
SLC22A5	green	0.0466759	-0.325798	-0.384057	0.241561	0.113175	0.0177535	0.0659519	0.317424	0.730878	0.543586	0.0336762	-0.127234	-0.278285	0.48211	0.186516
SLC2A10	green	0.202918	-0.389938	-0.611537	0.177883	-0.0572097	-0.153262	0.0708068	0.299544	0.896465	0.693885	0.384354	0.214958	-0.234213	0.593309	0.383925
PARVA	green	0.0778209	-0.279006	-0.568895	0.215546	-0.0612949	-0.206962	0.0438568	0.24296	0.882096	0.745799	0.192543	0.214674	-0.20561	0.606855	0.448152
ADH5	green	0.269301	-0.176729	-0.49724	-0.0225903	-0.246935	-0.3053	0.0361015	0.0852349	0.812911	0.718433	0.318808	0.261218	-0.150838	0.408419	0.414677
ELOVL2	green	0.0832276	-0.156534	-0.229077	0.122152	-0.00959117	-0.173792	-0.164747	0.0524154	0.713271	0.853244	-0.119351	-0.0230852	-0.352516	0.301757	0.252217
SIRPA	green	0.123297	-0.361098	-0.242705	0.246832	0.172178	0.0401598	-0.00906027	0.247157	0.771232	0.816158	-0.0232193	-0.00305353	-0.460215	0.343162	0.118552
SULT1C4	green	0.198067	-0.277774	-0.58036	0.127469	-0.109603	-0.174507	0.0640746	0.249813	0.79328	0.583033	0.4789	0.251202	-0.100379	0.515132	0.424652
ANKRD35	green	0.163209	-0.675605	-0.538797	0.402768	0.357421	0.272904	0.491154	0.698254	0.704325	0.321453	0.139927	0.334781	-0.0948283	0.660562	0.130501
TOX	green	0.22009	-0.232595	-0.4259	0.175458	-0.0573029	-0.230942	0.00225305	0.125138	0.812366	0.790042	0.126963	0.130114	-0.258834	0.402661	0.363741
RORB	green	0.14252	-0.152743	-0.311485	0.197793	0.00384607	-0.241847	-0.131018	0.064282	0.80057	0.890181	-0.00464112	0.0494199	-0.301869	0.318954	0.361547
DDR1	green	0.214599	-0.498837	-0.748204	0.286265	0.0679698	-0.00426869	0.355166	0.555157	0.724865	0.251856	0.425782	0.371914	0.241474	0.764154	0.395864
GPR56	green	0.0912225	-0.460158	-0.499521	0.343759	0.185389	0.0553053	0.202209	0.459813	0.827021	0.643979	-0.048253	0.080578	-0.216727	0.678066	0.274599
LEPROT	green	0.158902	-0.24381	-0.579672	-0.0710817	-0.326244	-0.268115	0.0960398	0.142306	0.761107	0.552379	0.327128	0.352222	-0.0680995	0.54507	0.407608
DDAH2	green	0.25585	-0.674579	-0.740701	0.302609	0.124494	0.173411	0.530988	0.671757	0.703524	0.209824	0.482447	0.41714	-0.00921401	0.776361	0.229371
VAC14-AS1	green	0.438613	-0.411259	-0.487084	0.0238705	-0.0714461	-0.0802931	0.182538	0.250483	0.729342	0.547202	0.457585	0.288151	-0.268067	0.331565	0.202647
PLIN5	green	0.190387	-0.459768	-0.390259	-0.0194449	-0.0636439	0.102431	0.274524	0.332555	0.776918	0.597953	0.206164	0.125176	-0.280163	0.383024	0.0765136
ZNF844	green	0.0979152	-0.297123	-0.508354	0.53446	0.286075	-0.110963	0.123072	0.378328	0.727344	0.509227	0.125331	-0.0112754	-0.0689074	0.543418	0.420493
OSTM1-AS1	green	0.189692	-0.351747	-0.399196	0.117231	0.0114584	-0.0298413	0.137973	0.276378	0.725951	0.599522	0.149591	0.109816	-0.211214	0.379822	0.198172
EMX2OS	green	0.161994	-0.360993	-0.461001	0.19478	0.0493863	-0.0502663	0.119871	0.312124	0.892034	0.785178	0.119733	0.14171	-0.292027	0.487995	0.32367
FEZF1-AS1	green	0.139351	-0.433098	-0.392043	0.130829	0.0259018	0.0595126	0.0714507	0.309087	0.770496	0.619057	0.227817	0.0124566	-0.345871	0.414658	0.101666
AC002429.5	green	0.240881	-0.349865	-0.392152	0.120977	0.0390175	-0.063604	0.223479	0.252766	0.67941	0.597123	0.270887	0.315883	-0.239024	0.26808	0.23601
NR2F1-AS1	green	0.271187	-0.438242	-0.601118	0.298555	0.108858	-0.0831383	0.217856	0.404276	0.888851	0.66679	0.265685	0.288495	-0.1759	0.576063	0.382351
TNFSF12	green	0.283127	-0.70209	-0.57728	0.33951	0.312838	0.259886	0.530873	0.707542	0.791325	0.411537	0.259168	0.36123	-0.184651	0.637777	0.167599
PCDHGC3	green	0.132872	-0.272494	-0.220319	0.0937564	-0.000927035	-0.0513894	-0.0748729	0.120349	0.776333	0.890092	-0.0363444	-0.0300404	-0.35949	0.293172	0.186737
PLEKHO2	green	0.332834	-0.545515	-0.545181	0.166176	0.0330974	0.00056377	0.263568	0.405634	0.839651	0.630693	0.233629	0.276592	-0.225409	0.573813	0.249769
SMIM20	green	0.153694	-0.479392	-0.534069	0.373458	0.222205	0.0641474	0.370086	0.526081	0.749247	0.443658	0.164768	0.272466	-0.0572922	0.586403	0.288592
PCDHGB6	green	0.113996	-0.193071	-0.335095	0.181129	0.0157251	-0.0980703	-0.0612136	0.14996	0.720438	0.752663	-0.0380374	-0.0759013	-0.274238	0.396182	0.282497
PCDHGB2	green	0.161757	-0.195314	-0.354741	0.0107151	-0.141271	-0.174583	-0.0443395	0.0799755	0.717706	0.712882	0.0979932	0.0553389	-0.163617	0.334229	0.284413
PCDHGB7	green	0.158659	-0.231751	-0.310783	0.17725	0.0382423	-0.0872611	-0.0395996	0.158238	0.76205	0.822974	-0.00712271	-0.0513319	-0.295323	0.375417	0.271917
SALL3	green	0.236338	-0.352125	-0.523174	0.454418	0.252024	-0.0629312	0.102329	0.371767	0.777888	0.650223	0.280374	0.126353	-0.172527	0.470599	0.405625
ARHGAP5-AS1	green	0.139419	-0.397414	-0.541449	0.176225	0.00428618	-0.0241853	0.213095	0.377434	0.715165	0.424831	0.442245	0.23863	-0.106814	0.490861	0.286722
RP11-553L6.5	green	0.253367	-0.241591	-0.620458	0.407785	0.128886	-0.24735	0.0942404	0.296747	0.7654	0.537444	0.286481	0.139462	-0.0784319	0.543184	0.523513
RP11-61A14.3	green	0.200732	-0.351699	-0.634192	0.471307	0.268882	-0.0880446	0.195955	0.469755	0.747692	0.446328	0.221798	0.248688	-0.00513645	0.603006	0.469188
GAN	green	0.163804	-0.220388	-0.687472	0.39421	0.0451213	-0.249378	0.101239	0.31731	0.796388	0.521326	0.234241	0.147528	-0.0486326	0.701623	0.559279
PCDHGB3	green	0.233531	-0.309943	-0.454079	0.126254	-0.0250883	-0.10531	0.0509354	0.234795	0.768371	0.683054	0.178355	0.164106	-0.174292	0.46452	0.315736
RP11-849I19.1	green	0.303069	-0.534948	-0.642632	0.398907	0.234872	0.0890247	0.383602	0.582783	0.781521	0.426664	0.341504	0.335657	-0.0958239	0.625644	0.308458
FXYD1	green	0.218008	-0.767696	-0.549163	0.331065	0.288871	0.317527	0.551754	0.716732	0.832161	0.460641	0.18724	0.245512	-0.19462	0.661428	0.082846
AC005336.4	green	0.095385	-0.146915	-0.351514	0.0318491	-0.12862	-0.207834	-0.0129201	0.103075	0.734264	0.721932	-0.0391449	0.0736428	-0.182669	0.413974	0.3476
MIR497HG	green	0.275768	-0.698693	-0.530624	0.328612	0.271183	0.233082	0.468714	0.627825	0.742458	0.431378	0.244918	0.292552	-0.217857	0.57715	0.10897
RP11-218C14.8	green	0.200048	-0.359879	-0.382124	0.295911	0.16397	-0.0224768	0.0789074	0.291761	0.711154	0.653486	0.0472362	0.107027	-0.308835	0.445816	0.217949
RP11-5C23.1	green	0.30133	-0.411749	-0.705376	0.3223	0.0983411	-0.111603	0.272638	0.4571	0.731008	0.332594	0.386992	0.404544	0.0208631	0.67236	0.42071
FKBP4	greenyellow	-0.174522	-0.16944	-0.147159	0.922159	0.789109	0.235023	0.090101	0.489966	0.143277	0.0135464	-0.230967	-0.279552	0.071271	0.357688	0.169586
NPC1L1	greenyellow	-0.118139	-0.248841	-0.104919	0.716239	0.723035	0.27501	0.13784	0.507093	0.258783	0.100424	-0.357434	-0.250012	-0.0200144	0.335229	0.101294
ZCCHC8	greenyellow	0.0425727	-0.00601799	-0.37154	0.740729	0.526749	-0.116166	0.0364138	0.328368	0.251535	0.0396062	-0.100929	-0.0411348	0.182385	0.409761	0.470252
HSPA5	greenyellow	-0.235766	-0.0612866	-0.167021	0.745173	0.573118	0.0694815	-0.0435024	0.333167	0.0884997	-0.0233107	-0.177277	-0.208197	0.132495	0.364628	0.213381
YIPF1	greenyellow	-0.110123	-0.29482	-0.450652	0.77066	0.577697	0.153216	0.257611	0.619663	0.351349	-0.0105604	-0.181474	0.0254913	0.193046	0.712296	0.317118
JMJD6	greenyellow	-0.0698246	-0.182226	-0.278446	0.95968	0.822567	0.164515	0.149392	0.550693	0.197567	-0.0191868	-0.198714	-0.161819	0.202507	0.447063	0.318113
P4HA2	greenyellow	-0.0698536	-0.212911	-0.425274	0.897092	0.670313	0.0714574	0.0963348	0.542022	0.378257	0.0857402	-0.0101263	-0.0724871	0.16454	0.582953	0.404199
HSP90AA1	greenyellow	-0.201949	-0.0674379	-0.214432	0.865925	0.643475	0.095057	0.0351705	0.393349	0.112586	-0.0743136	-0.0624302	-0.240148	0.137364	0.350309	0.257212
PLOD1	greenyellow	-0.0214841	-0.377264	-0.441742	0.854449	0.734222	0.196814	0.311151	0.679572	0.439515	0.101289	-0.0562059	0.0457168	0.121527	0.615535	0.332624
TXLNA	greenyellow	0.0264787	-0.283068	-0.503639	0.744817	0.592575	0.0970009	0.199761	0.586078	0.383369	0.0688655	-0.0331998	0.0228095	0.132194	0.667308	0.394065
DNAJA1	greenyellow	-0.17156	-0.0490096	-0.274839	0.947906	0.72498	0.0538785	0.0203359	0.433738	0.189283	0.0221256	-0.148472	-0.182562	0.144832	0.437156	0.367203
GOLGA3	greenyellow	0.00675223	-0.267323	-0.31287	0.766687	0.708516	0.217532	0.277908	0.577505	0.249529	0.0222994	-0.150624	-0.0202604	0.0398969	0.46302	0.275566
MKNK2	greenyellow	0.0271301	-0.43028	-0.46003	0.84039	0.681399	0.204355	0.248837	0.668666	0.552473	0.223078	0.00500062	-0.0880956	0.0106578	0.602595	0.293039
XBP1	greenyellow	-0.234587	-0.0509337	-0.230137	0.809006	0.598122	0.0883302	-0.00715877	0.393081	0.135445	-0.0118364	-0.265557	-0.204768	0.107024	0.480332	0.28011
AHSA1	greenyellow	-0.188536	-0.178999	-0.0879076	0.917661	0.876607	0.324401	0.152961	0.554526	0.0771804	-0.0888918	-0.303154	-0.237303	0.0958673	0.31281	0.122937
ACIN1	greenyellow	0.166213	-0.526751	-0.405261	0.774703	0.753646	0.310331	0.411208	0.715425	0.358754	0.0177965	0.0536687	0.105786	0.133984	0.502633	0.195156
SIPA1L3	greenyellow	0.0429332	-0.316356	-0.238698	0.707897	0.703864	0.283278	0.179657	0.547106	0.266648	0.105124	-0.0219889	-0.0769237	0.0185239	0.336689	0.189903
DNAJB6	greenyellow	-0.153729	0.0175579	-0.212145	0.916898	0.719768	0.0392634	-0.00791232	0.375599	0.0941122	-0.0395608	-0.173409	-0.161511	0.156404	0.349771	0.35041
HSPB1	greenyellow	-0.0289278	-0.532215	-0.418253	0.840001	0.703429	0.34442	0.336194	0.746718	0.44354	0.0749537	-0.0182844	-0.0932536	0.0772588	0.642124	0.165603
PLOD3	greenyellow	0.00164617	-0.301429	-0.514012	0.892223	0.712789	0.14139	0.269835	0.671715	0.247041	-0.177376	0.05357	0.115263	0.475988	0.638098	0.417848
CLDN15	greenyellow	-0.0086166	-0.135197	-0.359841	0.713677	0.603384	0.064685	0.222678	0.478697	0.108892	-0.185193	0.0142988	0.100088	0.428245	0.397781	0.347543
CHIC2	greenyellow	0.111174	-0.257089	-0.63179	0.733636	0.451889	-0.0285515	0.17724	0.532922	0.43133	0.0360236	0.220619	0.15954	0.220958	0.682997	0.498989
CRYAB	greenyellow	-0.0916392	-0.249979	-0.483576	0.818456	0.610732	0.0934033	0.299795	0.602495	0.217091	-0.191135	-0.00221843	0.0693643	0.542508	0.609231	0.41461
HSPA8	greenyellow	-0.193241	-0.195989	-0.287085	0.875986	0.68966	0.116079	0.0197657	0.475761	0.334354	0.162772	-0.0819617	-0.19213	0.0229211	0.464924	0.284848
PUS3	greenyellow	-0.12028	0.0406285	-0.129197	0.718027	0.536793	-0.0182382	-0.0108666	0.25	0.0132773	-0.100633	-0.326693	-0.184804	0.165785	0.315414	0.261146
CHORDC1	greenyellow	-0.0804919	-0.0310292	-0.346484	0.922322	0.658317	-0.0211714	-0.0127338	0.405549	0.175389	-0.0412564	-0.0161136	-0.135805	0.251694	0.437278	0.438663
PTGES3	greenyellow	-0.164176	-0.0031552	-0.377649	0.897607	0.613769	-0.0378184	0.0267436	0.411105	0.184689	-0.0783853	0.00148347	-0.117324	0.295388	0.477999	0.452562
MRPL18	greenyellow	-0.183148	-0.171009	-0.0796788	0.843606	0.740767	0.300862	0.102637	0.479492	0.0540208	-0.0976076	-0.225191	-0.269063	0.0189749	0.301508	0.0831303
SNX3	greenyellow	-0.210756	0.0198276	-0.291626	0.83873	0.599478	-0.0172013	0.0324505	0.376738	0.254518	0.117422	-0.132024	-0.0954468	0.104515	0.428504	0.423363
TARS	greenyellow	-0.212005	0.145788	-0.297154	0.768333	0.473602	-0.116751	-0.142937	0.24836	0.0874635	-0.0367592	-0.200654	-0.0846712	0.238455	0.483319	0.468496
PLXNA1	greenyellow	0.084132	-0.371526	-0.367353	0.708001	0.659745	0.23859	0.221824	0.595687	0.361079	0.155457	0.102376	0.0738485	-0.0797711	0.436445	0.230873
CCT4	greenyellow	-0.215931	-0.0411883	-0.245576	0.901152	0.700276	0.0984903	0.0298601	0.440338	0.168054	-0.0192655	-0.166116	-0.236397	0.117672	0.42263	0.31355
HSPE1	greenyellow	-0.0592537	-0.312237	-0.44072	0.865662	0.606285	0.156936	0.259299	0.591934	0.334689	0.0121506	0.0581075	-0.0509491	0.129056	0.603744	0.305208
SPR	greenyellow	0.0909498	-0.417587	-0.335762	0.818688	0.783544	0.315585	0.320037	0.68576	0.313173	-0.00832529	0.137428	0.0684221	0.0667089	0.433514	0.189708
ALG2	greenyellow	-0.194973	0.0300168	-0.362393	0.710593	0.456868	-0.101815	-0.135005	0.312402	0.264636	0.0728064	-0.118778	-0.0623491	0.19614	0.501773	0.443253
TCP1	greenyellow	-0.280209	0.17407	-0.211888	0.802489	0.535975	-0.0632593	-0.0723776	0.24411	0.0224775	-0.0992571	-0.251263	-0.256515	0.216829	0.380561	0.387106
MAX	greenyellow	0.10124	-0.289323	-0.563342	0.791079	0.634647	0.0841402	0.362433	0.640314	0.343144	-0.0464598	0.157012	0.286383	0.321802	0.591695	0.464717
ATF4	greenyellow	-0.0399968	-0.307402	-0.468426	0.789518	0.626114	0.174633	0.29002	0.634111	0.205771	-0.184837	-0.0456709	0.106762	0.260708	0.656331	0.321014
SESN2	greenyellow	-0.135965	-0.163552	-0.215389	0.821207	0.64512	0.153918	0.0289049	0.432556	0.310283	0.202105	-0.246928	-0.299122	-0.119693	0.44924	0.228643
DNAJB1	greenyellow	-0.0499158	-0.338185	-0.364535	0.791688	0.562129	0.150641	0.1166	0.51192	0.333023	0.067836	0.0350211	-0.143731	0.109846	0.526481	0.231097
HSD17B7	greenyellow	-0.0346288	-0.0735668	-0.33844	0.792976	0.594178	0.0230712	0.136391	0.419088	0.0270653	-0.231928	-0.10181	-0.0402097	0.446896	0.440134	0.359957
MORC2	greenyellow	0.0881584	-0.401318	-0.401875	0.767858	0.696709	0.215866	0.197245	0.609284	0.466445	0.223709	-0.0125172	-0.00355955	-0.0572103	0.523091	0.2536
DPF2	greenyellow	0.0747878	-0.338414	-0.340717	0.744383	0.675162	0.218048	0.272524	0.599135	0.302279	0.0215012	-0.0498623	-0.0796952	0.297459	0.438603	0.251942
DNAJB2	greenyellow	-0.0246647	-0.333468	-0.324716	0.855894	0.793754	0.335278	0.372669	0.704639	0.117177	-0.269408	-0.0143605	-0.0288237	0.363658	0.46656	0.194597
JDP2	greenyellow	0.0579674	-0.393732	-0.327144	0.779548	0.689821	0.286516	0.270382	0.623367	0.326948	0.0370097	0.114279	0.034333	0.0151994	0.421613	0.170604
ZCCHC2	greenyellow	-0.0528052	0.100252	-0.178278	0.790252	0.610028	-0.0820644	-0.0512462	0.240388	0.115176	0.0800254	-0.265861	-0.1885	0.181933	0.273447	0.385707
ZNF473	greenyellow	-0.051809	-0.0724839	-0.258685	0.786766	0.629085	0.0749067	0.0113988	0.383834	0.107353	-0.087769	0.183643	-0.114861	0.0878269	0.276312	0.27852
PDIA6	greenyellow	-0.267671	-0.108368	-0.175841	0.72386	0.618383	0.135682	-0.0194578	0.392204	0.181828	0.0891014	-0.194042	-0.122403	0.0899127	0.388338	0.231298
HSPD1	greenyellow	-0.1024	-0.168183	-0.381088	0.830585	0.533391	0.0467202	0.0592185	0.439465	0.394143	0.189678	-0.0465324	-0.200401	0.0263398	0.552254	0.345537
MANF	greenyellow	-0.140886	-0.192808	-0.212633	0.789953	0.670946	0.195669	0.16003	0.492302	0.0802621	-0.121534	-0.174133	-0.0957486	0.171852	0.42869	0.176763
SERPINH1	greenyellow	-0.00151628	-0.355739	-0.486613	0.789016	0.506955	0.0812624	0.172557	0.537363	0.435341	0.117234	0.0859848	-0.0526647	0.13265	0.645938	0.324631
CEBPG	greenyellow	-0.0437055	0.0227236	-0.403251	0.743264	0.442982	-0.103032	-0.0927084	0.306359	0.266025	0.036463	0.108114	-0.091082	0.051028	0.478901	0.455409
PDIA4	greenyellow	-0.0111725	-0.290542	-0.591159	0.794452	0.535898	0.0212013	0.183542	0.587578	0.373789	-0.0182976	0.219787	0.196071	0.342102	0.692267	0.470625
CLIC2	greenyellow	-0.12809	0.09096	-0.366096	0.755986	0.413565	-0.177863	0.000221538	0.238403	0.211566	0.0413452	-0.104121	-0.0883244	0.0847343	0.485868	0.469445
SCAF4	greenyellow	-0.0888878	-0.237283	-0.148687	0.805706	0.767373	0.319297	0.159838	0.540048	0.156745	-0.00136687	-0.27989	-0.218809	0.0985444	0.342958	0.125367
EYA3	greenyellow	0.00533984	-0.0358425	-0.138952	0.713841	0.655313	0.043812	0.0130939	0.318413	0.221971	0.189206	-0.259446	-0.183197	0.00708193	0.201523	0.261576
UBE2Z	greenyellow	-0.120444	-0.0944593	-0.310132	0.732035	0.574962	0.0823727	0.141209	0.43386	0.0606703	-0.214129	0.00726344	-0.0649282	0.394472	0.407081	0.292661
CCDC117	greenyellow	-0.077303	0.11773	-0.252172	0.853286	0.594463	-0.122928	-0.082487	0.257278	0.0859347	-0.0356819	-0.113605	-0.164395	0.222556	0.32886	0.460664
SQSTM1	greenyellow	-0.153194	-0.37949	-0.457275	0.758572	0.605444	0.257707	0.250158	0.683741	0.478742	0.141205	-0.0419775	-0.0779445	0.139595	0.67113	0.292109
DNAJB4	greenyellow	-0.171921	0.073391	-0.165793	0.812112	0.585707	-0.0294754	-0.12762	0.257188	0.141968	0.0818312	-0.0706854	-0.286528	0.0820815	0.247369	0.349226
PKDCC	greenyellow	0.0525977	-0.356304	-0.456025	0.744239	0.568168	0.125049	0.24676	0.567455	0.413378	0.137104	0.00983502	0.129401	0.113402	0.58776	0.313965
BNIPL	greenyellow	0.0875025	-0.275259	-0.436398	0.762677	0.610975	0.0859447	0.206977	0.543607	0.368077	0.0655318	0.0319851	0.0307572	0.17489	0.518704	0.35225
CCT3	greenyellow	-0.161853	-0.212766	-0.0718897	0.885268	0.872586	0.345325	0.138717	0.550376	0.109635	-0.0408108	-0.269715	-0.28904	0.00347759	0.293258	0.0825064
TMEM79	greenyellow	0.0683816	-0.289325	-0.273794	0.853097	0.781551	0.217706	0.194253	0.575101	0.281454	0.0479432	-0.0556944	-0.0687321	0.102716	0.381872	0.217711
ENGASE	greenyellow	-0.052044	-0.274777	-0.440181	0.805469	0.630554	0.164278	0.190359	0.569644	0.281891	-0.0257718	0.0139954	0.0655514	0.202973	0.568868	0.314748
ZNF646	greenyellow	0.0152684	-0.364308	-0.272148	0.698398	0.731768	0.284982	0.24546	0.604301	0.30524	0.0951647	-0.110348	0.0608031	0.0842676	0.413885	0.206896
C11orf84	greenyellow	-0.0953921	-0.234928	-0.134837	0.911155	0.871247	0.338268	0.18917	0.582067	0.121001	-0.0586462	-0.205708	-0.211241	0.017674	0.330494	0.134118
KCTD6	greenyellow	-0.00546409	-0.00300917	-0.296471	0.698949	0.447421	-0.144516	-0.082952	0.243989	0.319023	0.185945	-0.213011	-0.190935	0.126842	0.416201	0.399275
STIP1	greenyellow	-0.141518	-0.190096	-0.163793	0.958052	0.852294	0.246957	0.118281	0.534059	0.14483	-0.0222644	-0.197879	-0.241464	0.0758665	0.352848	0.191387
POLR3D	greenyellow	-0.00383722	-0.124192	-0.412597	0.720792	0.567109	0.0354815	0.177223	0.472006	0.256161	0.0589285	-0.0562637	0.130351	0.231088	0.499595	0.442657
PCBP1	greenyellow	-0.0954051	-0.28393	-0.313239	0.867431	0.737041	0.290222	0.187923	0.632804	0.234322	-0.0629705	-0.0153964	-0.0680343	0.162922	0.506445	0.240244
NUDT9	greenyellow	-0.175546	-0.039269	-0.0579656	0.844156	0.770964	0.179712	0.0654166	0.400681	0.0571498	-0.0377334	-0.253065	-0.229201	0.044172	0.216563	0.180053
HSPA4	greenyellow	-0.169166	0.0237947	-0.224951	0.887624	0.641874	-0.0199287	-0.0587243	0.331058	0.225504	0.127298	-0.184661	-0.240073	0.0661997	0.384928	0.382027
PPID	greenyellow	-0.101867	0.0608239	-0.223862	0.860225	0.669088	-0.0262415	-0.0418262	0.318251	0.139941	0.00664749	-0.116611	-0.188093	0.123093	0.30563	0.365015
BANP	greenyellow	0.00516119	-0.353585	-0.354891	0.874511	0.810476	0.293033	0.245723	0.683977	0.21196	-0.112624	-0.0328321	0.011351	0.208833	0.497922	0.232931
DDX23	greenyellow	0.0375987	-0.283997	-0.548602	0.700882	0.56907	0.108904	0.250089	0.618631	0.408081	0.0576308	0.0301259	0.265793	0.247707	0.689724	0.438154
LMNB2	greenyellow	-0.0268975	-0.404244	-0.393852	0.758128	0.704496	0.336661	0.286615	0.698698	0.359761	0.0740036	-0.00407053	0.0365669	-0.0394757	0.57925	0.21946
C10orf85	greenyellow	0.0362018	-0.326061	-0.398349	0.805204	0.672918	0.133314	0.317972	0.590953	0.348968	0.070488	-0.143063	0.0889539	0.203041	0.541814	0.329682
RCC1	greenyellow	-0.0956328	-0.120332	-0.271732	0.820044	0.733282	0.167807	0.181943	0.524466	0.122312	-0.0955718	-0.182361	-0.00416095	0.155795	0.449224	0.310994
UBE2F	greenyellow	-0.2293	-0.112746	-0.242243	0.705589	0.558044	0.112499	0.2009	0.424535	0.0185399	-0.207614	-0.185232	0.0868251	0.276753	0.424333	0.220687
C7orf61	greenyellow	0.0560411	-0.406193	-0.426004	0.86014	0.765365	0.214738	0.282261	0.681231	0.432479	0.116011	-0.0669884	-0.0298321	0.0985627	0.579891	0.296394
CA5BP1	greenyellow	0.0295087	-0.416266	-0.306169	0.699786	0.70315	0.313225	0.294586	0.64605	0.252448	-0.0183737	0.041426	0.0726518	0.132075	0.390921	0.160619
STK40	greenyellow	-0.112318	-0.25576	-0.399455	0.782007	0.591129	0.15039	0.0985158	0.541631	0.341724	0.110077	-0.112378	-0.0937649	0.000594844	0.631352	0.316255
MAFG	greenyellow	-0.0869859	-0.191251	-0.169436	0.761431	0.697769	0.189862	0.0796096	0.449545	0.33322	0.282955	-0.228316	-0.204693	-0.162282	0.345949	0.208529
GTF2E2	greenyellow	-0.108138	-0.201794	-0.257219	0.759474	0.651488	0.212665	0.22651	0.520804	0.100308	-0.190006	-0.054843	-0.108157	0.184788	0.395593	0.169048
DAXX	greenyellow	0.0842807	-0.406474	-0.438358	0.750203	0.704657	0.226517	0.336743	0.679333	0.341249	0.00891708	-0.000297774	0.202032	0.187362	0.56816	0.309575
HSPA1B	greenyellow	-0.00236585	-0.444016	-0.356915	0.736655	0.566775	0.234917	0.196614	0.566862	0.338958	0.0482715	0.126455	-0.0521827	0.0812972	0.499064	0.145869
HSPA1A	greenyellow	-0.0513109	-0.406653	-0.321193	0.781226	0.617816	0.254095	0.184482	0.573873	0.302119	0.0316203	0.0302895	-0.0930939	0.102644	0.492849	0.146639
HSPA1L	greenyellow	-0.127992	-0.178279	-0.114653	0.768317	0.668781	0.229046	0.0877446	0.433112	0.195476	0.109848	-0.231687	-0.265103	0.0129187	0.289773	0.117531
MICB	greenyellow	-0.00269355	-0.262485	-0.542667	0.794193	0.529918	0.0217152	0.21535	0.533333	0.400995	0.0531417	0.0587541	0.116837	0.215987	0.657222	0.438091
RP9P	greenyellow	0.00210886	-0.225844	-0.136486	0.736179	0.636788	0.234321	0.24093	0.432187	0.0960488	-0.0543234	-0.171069	-0.185953	-0.0494957	0.276866	0.0798759
RPL17P50	greenyellow	0.0967252	-0.265084	-0.49005	0.857236	0.642273	0.0369188	0.227289	0.553635	0.439888	0.156753	0.00399826	0.0313595	0.133926	0.581647	0.438077
C17orf67	greenyellow	-0.101515	-0.14634	-0.177556	0.730812	0.575049	0.160411	0.169962	0.41507	0.0875443	-0.0813296	-0.209135	-0.0848653	0.0864948	0.378329	0.155401
TRIM16	greenyellow	-0.122641	-0.281134	-0.340811	0.873167	0.721016	0.196823	0.149054	0.579225	0.422357	0.194144	-0.152958	-0.187146	-0.0718539	0.530958	0.262699
AC063976.7	greenyellow	-0.0884573	-0.126967	-0.430806	0.771386	0.499079	-0.0531659	0.0434397	0.407575	0.418941	0.179278	0.00708308	-0.0370627	0.125123	0.516446	0.447282
RP11-44M6.1	greenyellow	-0.0468993	-0.141237	-0.328615	0.715027	0.567042	0.0686642	0.0476649	0.440891	0.275818	0.0463178	0.156507	-0.0622765	0.0843725	0.374826	0.335544
RP11-157P1.4	greenyellow	0.00111979	-0.290197	-0.290337	0.698637	0.626809	0.240424	0.21628	0.533268	0.273649	0.024874	-0.15202	-0.165743	-0.0283276	0.460807	0.158831
SOS1-IT1	greenyellow	-0.0189707	-0.119738	-0.305999	0.690513	0.563237	0.0326818	0.112882	0.408809	0.268101	0.090669	-0.106296	-0.044451	0.0186149	0.386674	0.341312
RP11-456P18.2	greenyellow	-0.0283904	-0.229472	-0.558273	0.712971	0.476518	-0.00409659	0.228406	0.539345	0.444465	0.095766	0.0754006	0.184141	0.25515	0.638969	0.483045
PTGES3P1	greenyellow	-0.214662	0.000662223	-0.389877	0.756095	0.456107	-0.0624613	0.0370183	0.356029	0.183708	-0.0453304	-0.0332997	0.00469733	0.225239	0.546462	0.442641
HSPB1P1	greenyellow	-0.101557	-0.310735	-0.186129	0.779008	0.673075	0.2544	0.221524	0.511704	0.249687	0.0765569	-0.292159	-0.174144	0.0293073	0.415471	0.113476
SCARNA12	greenyellow	-0.0744798	-0.203248	-0.297368	0.727818	0.600199	0.124598	0.242568	0.48701	0.235677	0.0223493	-0.160018	0.010223	0.197828	0.438439	0.295822
AC012442.5	greenyellow	-0.0716753	-0.158172	-0.250467	0.716715	0.646856	0.149466	0.167934	0.474044	0.154744	-0.0566526	-0.108611	-0.00139279	0.109521	0.33355	0.258905
MRPS6	greenyellow	0.000476344	-0.34421	-0.294087	0.84152	0.705375	0.202713	0.18603	0.552827	0.421646	0.217149	-0.0487202	-0.115168	-0.113312	0.433914	0.191032
RP11-867G23.3	greenyellow	0.074762	-0.230765	-0.28838	0.701414	0.621213	0.127118	0.100884	0.434124	0.29536	0.128844	0.0200754	-0.120458	0.0161323	0.298039	0.246461
[truncated: 3,431 more rows]
