# Supplementary material for: Comprehensive transcriptomic analysis indicates brain regional specific alterations in type 2 diabetes
Source: Aging (Albany NY). 2019 Aug 26;11(16):6398–421. doi: 10.18632/aging.102196 (PMC6738403; doi:10.18632/aging.102196)
Supplement: Supplementary Table 5 [file aging-11-102196-s010.xlsx]

## Sheet: GS_and_MM
Supplementary Table 5. Membership information for all assigned genes in hippocampus
Gene	Module	GS.T2D	MMlightgreen	MMtan	MMpurple	MMsteelblue	MMcyan	MMsalmon	MMblack	MMmagenta	MMroyalblue	MMwhite	MMplum1	MMskyblue3	MMdarkmagenta	MMyellowgreen	MMbrown	MMpink	MMgrey60	MMviolet	MMyellow	MMmediumpurple3	MMblue	MMgreenyellow	MMorange	MMskyblue	MMdarkolivegreen	MMsienna3	MMdarkred	MMmidnightblue	MMdarkorange	MMdarkturquoise	MMlightcyan	MMorangered4	MMdarkgreen	MMdarkgrey	MMpaleturquoise	MMturquoise	MMlightyellow	MMsaddlebrown	MMgreen	MMred
SLC25A13	black	0.0492232	0.112409	0.0454953	0.232339	0.163649	0.410054	0.260306	0.757087	0.509913	0.157459	0.348124	0.683148	0.397962	-0.122805	0.11694	0.036502	-0.13093	0.14895	0.121277	0.230531	-0.36096	0.00788783	-0.270732	-0.0365362	0.305609	0.320169	-0.00757027	0.135433	0.136698	0.137468	-0.417919	-0.443042	0.0441747	0.105699	0.247052	-0.609494	-0.333657	-0.445504	-0.0923328	-0.236872	-0.666845
TMEM98	black	0.00363415	-0.0657002	-0.262181	0.25984	0.0876099	0.592574	0.32394	0.803878	0.640687	-0.287495	-0.255994	0.175203	-0.169982	-0.171842	-0.160594	0.169545	-0.0567724	0.102306	0.338432	0.546898	-0.188842	0.38453	0.164565	-0.212389	0.214983	0.364259	0.171323	0.460628	0.373224	-0.144501	-0.065063	-0.295352	0.0951746	-0.201097	-0.187661	-0.557553	-0.603836	-0.350437	-0.326405	-0.327605	-0.305814
ANLN	black	-0.0222361	0.154456	-0.0042521	0.33867	0.317223	0.609636	0.380481	0.79345	0.748443	-0.172575	-0.0988743	0.286918	-0.0971106	-0.188161	-0.0248129	0.26185	0.0370595	0.199685	0.260626	0.366271	-0.413458	0.0762526	-0.159165	-0.208338	0.475413	0.416943	0.0658038	0.223168	0.260512	-0.174737	-0.0751929	-0.258803	0.0244388	-0.0538806	-0.0803835	-0.683358	-0.596729	-0.433002	-0.269707	-0.174156	-0.498726
CD22	black	-0.0524084	0.369778	0.0940945	0.375995	0.391579	0.656036	0.564796	0.804887	0.600015	0.343107	0.382412	0.510385	0.00625722	-0.111328	0.0981558	0.0822719	-0.257843	0.0980833	0.170039	0.374569	-0.471316	0.00931166	-0.282126	-0.228	0.223276	0.194594	-0.148416	0.200151	0.129704	-0.263273	-0.279134	-0.3106	0.12489	0.161838	-0.170924	-0.523481	-0.560831	-0.461843	-0.357111	-0.134908	-0.405429
SEMA3B	black	-0.0190972	0.0696871	-0.154033	0.285254	0.0835321	0.55588	0.443784	0.766274	0.410323	0.204736	0.290107	0.497516	0.145095	-0.150217	-0.0147692	-0.0319393	-0.332183	0.0328455	0.244012	0.515809	-0.19937	0.273766	-0.0686795	-0.239992	0.14269	0.249369	-0.0811487	0.354825	0.226817	-0.111232	-0.422819	-0.493703	0.210674	0.00848445	-0.0931788	-0.289045	-0.385674	-0.342374	-0.340771	-0.255465	-0.222984
CLDN11	black	-0.052027	0.153433	-0.00550721	0.488289	0.348726	0.691096	0.5443	0.870595	0.769231	-0.114764	-0.019489	0.366625	-0.0038512	-0.0681128	0.114931	0.331668	-0.00629143	0.065096	0.196679	0.503044	-0.47316	0.111892	-0.161549	-0.283338	0.076688	0.421909	0.0364375	0.351286	0.407728	-0.220687	-0.391794	-0.537641	-0.0967496	-0.234114	-0.341646	-0.503696	-0.679951	-0.375053	-0.392909	-0.24749	-0.235647
CLCA4	black	0.069989	0.159841	0.0115475	0.13611	0.157609	0.541058	0.282279	0.791711	0.635791	-0.020809	0.0985723	0.513074	0.186971	-0.147285	0.0355444	0.0856942	-0.0203462	0.258117	0.300686	0.350036	-0.323652	0.0876258	-0.21731	-0.141914	0.290436	0.263067	0.0540839	0.162162	0.157645	0.0226264	-0.293854	-0.366464	0.148607	0.012644	0.0552498	-0.573546	-0.363019	-0.520146	-0.319042	-0.42097	-0.623937
PHLDB1	black	-0.253802	0.456167	0.356985	0.274097	0.367399	0.538116	0.481922	0.75274	0.52648	0.342475	0.332273	0.540175	0.231153	-0.21508	0.199621	0.0570893	-0.166407	0.127403	0.10204	0.237781	-0.457228	-0.137545	-0.454677	-0.391165	0.0538178	0.188385	-0.404069	-0.05994	-0.0394315	0.079586	-0.443975	-0.384246	0.218242	0.197708	-0.00634502	-0.426642	-0.37715	-0.238293	-0.199216	-0.237715	-0.302262
AGPAT4	black	-0.102052	0.166165	0.19628	0.51989	0.461399	0.552311	0.519131	0.720241	0.723769	0.215525	0.441669	0.709113	0.355738	0.133442	0.485755	0.398887	0.0930719	-0.280551	-0.142366	0.278326	-0.616776	-0.106258	-0.330123	-0.153146	0.114714	0.169863	0.0463334	0.248999	0.371565	0.00894704	-0.454355	-0.443278	-0.154073	-0.127987	-0.199878	-0.606121	-0.611833	-0.479265	-0.322539	-0.4136	-0.45996
FUT8	black	0.00994391	-0.0378026	-0.0428408	0.165521	0.0967771	0.494458	0.200001	0.779613	0.706547	-0.171129	0.111818	0.630429	0.416709	-0.0668938	0.179536	0.259282	0.207241	0.200613	0.251057	0.380063	-0.36713	0.109101	-0.151139	-0.064792	0.351418	0.354508	0.296511	0.235493	0.340945	0.199143	-0.339557	-0.479208	-0.007291	-0.220149	-0.00435415	-0.641387	-0.409766	-0.517453	-0.333571	-0.558021	-0.597365
DAPK2	black	-0.0738232	0.0212293	-0.0681972	0.314127	0.157929	0.516424	0.390113	0.745142	0.546628	0.231048	0.440916	0.700836	0.335885	-0.175865	0.212052	0.139704	-0.090262	-0.107119	0.0397323	0.363168	-0.400921	0.0726781	-0.201403	-0.0106451	0.302864	0.2225	0.0777692	0.265406	0.289992	0.0809545	-0.36771	-0.38544	0.271983	0.0174097	-0.0704946	-0.52404	-0.420285	-0.483019	-0.354362	-0.4372	-0.487833
PLEKHH1	black	-0.0871481	0.314235	0.270737	0.351442	0.38055	0.539406	0.434113	0.851648	0.685615	0.307772	0.480464	0.766545	0.415935	-0.0751735	0.331948	0.191375	-0.0241928	0.0891921	0.0301986	0.213011	-0.589272	-0.181891	-0.485119	-0.210248	0.230324	0.268967	-0.110173	0.0403071	0.14389	0.0308257	-0.447476	-0.433769	0.0830448	0.118348	0.0477876	-0.644289	-0.448444	-0.4268	-0.197351	-0.325853	-0.595817
ERBB3	black	-0.0120617	0.193698	0.103155	0.293923	0.267629	0.594427	0.389173	0.895605	0.741706	0.133119	0.302462	0.631059	0.257421	-0.0467927	0.230627	0.1825	-0.0031151	0.168262	0.160455	0.327104	-0.500977	-0.0194507	-0.278193	-0.163279	0.262727	0.305686	0.0268952	0.163065	0.208993	0.0275731	-0.319025	-0.402128	0.0999831	-0.00747197	-0.053032	-0.638641	-0.50955	-0.47266	-0.284388	-0.38848	-0.554337
TMEM206	black	0.0302004	0.0403518	-0.0938882	0.334175	0.199861	0.621402	0.428382	0.805272	0.670153	-0.0987336	-0.0233583	0.348346	0.00742242	-0.0513342	0.0875563	0.202954	-0.0373887	-0.0481815	0.175402	0.487406	-0.345833	0.219015	0.00317353	-0.139489	0.0569699	0.234527	0.0841935	0.371605	0.325992	0.0115888	-0.192426	-0.358608	0.0221764	-0.152731	-0.225575	-0.565277	-0.626649	-0.43189	-0.3596	-0.36004	-0.351292
PRKCQ	black	0.0761268	0.0335617	-0.100935	0.257621	0.141013	0.609115	0.360972	0.861012	0.676769	-0.0791228	0.0646861	0.52558	0.228471	-0.0849411	0.0812271	0.174165	-0.0297502	0.137958	0.29105	0.490826	-0.297931	0.230924	0.00682518	-0.0838584	0.279663	0.25838	0.111943	0.332114	0.302293	0.223208	-0.30508	-0.429246	0.0565144	-0.136406	-0.021144	-0.674334	-0.56686	-0.481355	-0.342208	-0.400534	-0.486998
ELOVL1	black	-0.0516305	0.110198	-0.161768	0.387649	0.207677	0.77046	0.533212	0.949888	0.723347	-0.0938695	-0.00484499	0.40381	0.0113613	-0.205721	-0.0544359	0.165269	-0.171971	0.132441	0.353501	0.646032	-0.356329	0.303411	-0.0832179	-0.191189	0.108544	0.412036	0.0476021	0.455958	0.385666	-0.144049	-0.338753	-0.528098	0.0741693	-0.14502	-0.207484	-0.587784	-0.637369	-0.446279	-0.38388	-0.322985	-0.390619
FGFR2	black	0.117603	0.00234002	-0.187869	0.255634	0.0778275	0.605609	0.360167	0.895009	0.641535	-0.00626766	0.153762	0.521884	0.143385	-0.0920431	-0.0137427	0.0636698	-0.161213	0.160357	0.283787	0.507611	-0.292529	0.260515	-0.0308434	-0.109028	0.283211	0.314988	0.12604	0.39888	0.310558	-0.0984487	-0.354927	-0.466484	0.120166	-0.109118	-0.113655	-0.512431	-0.516556	-0.495371	-0.394168	-0.360269	-0.401785
ROGDI	black	0.0671365	0.0286972	-0.336433	0.35259	0.150941	0.781128	0.509422	0.790266	0.620251	-0.163002	-0.0317113	0.407721	0.0186651	-0.146717	-0.113575	0.180349	-0.14632	0.113648	0.521776	0.798098	-0.205218	0.504655	0.122665	-0.142418	0.2343	0.34453	0.258367	0.610327	0.482435	-0.0899205	-0.355402	-0.551554	-0.109726	-0.295465	-0.267084	-0.581554	-0.623493	-0.691689	-0.550597	-0.346293	-0.510976
SIRT2	black	-0.10187	-0.058224	-0.292607	0.274843	0.11602	0.713402	0.418909	0.782723	0.66387	-0.314516	-0.212879	0.248922	-0.0876794	-0.140503	-0.106535	0.226354	-0.00203423	0.0681335	0.450932	0.706934	-0.149772	0.466954	0.221464	-0.174706	0.363098	0.273084	0.23263	0.513605	0.405434	0.064705	-0.0894138	-0.356964	0.021122	-0.291113	-0.25802	-0.55474	-0.63865	-0.544412	-0.523084	-0.423186	-0.359025
SLC44A1	black	0.0182769	0.125208	0.0718977	0.329202	0.291481	0.518241	0.329475	0.780123	0.752542	-0.140705	-0.0359363	0.309652	0.00829014	-0.00493732	0.0993904	0.281638	0.0968896	0.186864	0.123189	0.254878	-0.492351	-0.0341445	-0.159375	-0.103021	0.398298	0.399902	0.0748141	0.17021	0.256174	-0.166735	-0.128632	-0.262382	0.0550226	-0.128965	-0.142885	-0.649948	-0.61138	-0.341934	-0.213478	-0.171039	-0.399412
NDE1	black	-0.161259	0.307086	0.0682525	0.469135	0.422744	0.735873	0.602298	0.833383	0.732934	0.0247079	0.0295811	0.27709	-0.151456	-0.19287	0.0283766	0.212149	-0.147019	0.0606823	0.191601	0.451243	-0.465017	0.0885523	-0.233879	-0.25073	0.126016	0.328293	-0.137825	0.289371	0.255397	-0.227807	-0.140011	-0.339481	0.0106883	0.00745328	-0.220975	-0.583504	-0.619881	-0.35023	-0.265671	-0.186696	-0.396543
PDE8A	black	-0.0520529	-0.031454	0.0229807	0.244079	0.126105	0.363055	0.200943	0.747816	0.582291	0.104667	0.387219	0.715025	0.466229	-0.119171	0.222562	0.161846	0.0331194	0.0838912	0.0164893	0.177529	-0.43031	-0.028946	-0.234903	-0.0411755	0.520538	0.345753	0.132249	0.175092	0.263805	0.147485	-0.287565	-0.337753	0.220889	0.0280215	0.181103	-0.675325	-0.376441	-0.34469	-0.109071	-0.351146	-0.552349
SYNJ2	black	-0.154243	0.259953	0.0906127	0.564697	0.488257	0.69931	0.596728	0.799182	0.767894	-0.0127467	0.127299	0.441244	0.0392522	-0.261247	0.125636	0.365453	-0.0155089	0.0123855	0.142717	0.412563	-0.549267	0.0301453	-0.262029	-0.227592	0.468335	0.372787	-0.0107824	0.321549	0.387445	-0.169323	-0.161895	-0.349919	-0.0103888	0.00270083	-0.121379	-0.715309	-0.67463	-0.435005	-0.302852	-0.196765	-0.471643
LIPE	black	-0.0745641	0.266149	-0.0982163	0.377504	0.285141	0.85423	0.621132	0.900146	0.696406	-0.0155251	-0.0399391	0.284617	-0.171841	-0.290049	-0.0892891	0.132375	-0.23059	0.159594	0.433527	0.680826	-0.325812	0.287262	-0.121801	-0.303749	0.0182229	0.317913	-0.0824064	0.373208	0.267636	-0.153341	-0.214309	-0.412738	0.0556532	-0.0490429	-0.290209	-0.518638	-0.632084	-0.400686	-0.415566	-0.262576	-0.301366
PTPRH	black	-0.129679	0.16829	-0.0620287	0.600353	0.411837	0.711043	0.626807	0.776452	0.681277	-0.0301209	0.0626412	0.372257	-0.00979039	-0.204168	0.0898916	0.349119	-0.113793	-0.0906913	0.147157	0.528501	-0.466826	0.12541	-0.211943	-0.295148	0.095188	0.40219	-0.0157871	0.405415	0.456114	-0.256872	-0.387624	-0.508333	-0.107103	-0.167915	-0.32178	-0.511261	-0.672726	-0.360888	-0.348772	-0.190679	-0.263178
PSEN1	black	0.0483642	0.182085	0.0841555	0.281481	0.287704	0.6292	0.395979	0.894505	0.78857	-0.00174271	0.184131	0.602553	0.266865	0.000597708	0.207698	0.232735	0.0629441	0.157179	0.195172	0.369342	-0.511618	-0.00406686	-0.269876	-0.0825047	0.240203	0.304844	0.107446	0.185662	0.24875	-0.00276192	-0.313702	-0.452472	-0.0166502	-0.0955043	-0.0686649	-0.696722	-0.547831	-0.535433	-0.321017	-0.443565	-0.624642
LRP2	black	-0.209896	0.344384	0.142862	0.453733	0.44388	0.704942	0.570528	0.854099	0.754598	0.0683908	0.100061	0.370429	-0.0768395	-0.280462	0.0862623	0.248818	-0.094514	0.136392	0.185474	0.383069	-0.548304	-0.0122381	-0.32953	-0.318044	0.247286	0.424441	-0.166256	0.189172	0.224551	-0.251257	-0.231198	-0.34595	0.131102	0.0436469	-0.164077	-0.587132	-0.610287	-0.352199	-0.290452	-0.206926	-0.385667
FOLH1	black	-0.00186764	0.0185123	0.0463453	0.307197	0.204886	0.464023	0.287356	0.863299	0.688383	-0.00319992	0.224817	0.676212	0.402205	-0.046383	0.209231	0.221335	0.05587	0.0788277	0.0613467	0.272178	-0.466966	0.00727828	-0.199173	-0.0487063	0.417429	0.397379	0.0909891	0.202334	0.293823	0.130273	-0.414253	-0.493944	0.11646	-0.0944414	0.0833006	-0.717283	-0.501689	-0.448489	-0.198679	-0.367868	-0.586409
ANAPC5	black	0.00298872	0.274514	0.107979	0.417985	0.430612	0.703953	0.553649	0.866156	0.783442	0.183343	0.335809	0.653283	0.207478	0.0562977	0.274676	0.274748	-0.0531441	-0.0344181	0.127843	0.419484	-0.548583	0.0363734	-0.234111	-0.185053	0.18134	0.156414	0.0376117	0.306989	0.305462	-0.120064	-0.344777	-0.397521	-0.0708513	-0.0475339	-0.143651	-0.751957	-0.692523	-0.577134	-0.365069	-0.396829	-0.604046
TF	black	-0.058331	0.192158	0.00367277	0.464556	0.339614	0.658871	0.534597	0.874284	0.701783	-0.0290126	0.0105553	0.333365	-0.0608021	-0.136865	0.0190562	0.202172	-0.157978	0.0496097	0.153455	0.435991	-0.445231	0.123507	-0.137823	-0.161685	0.105164	0.373088	-0.0762003	0.348018	0.31396	-0.211609	-0.264678	-0.430561	0.0463669	-0.044788	-0.153232	-0.603303	-0.668008	-0.337927	-0.228945	-0.156171	-0.352063
SEMA6A	black	-0.103729	0.112106	0.047645	0.20845	0.132538	0.505379	0.327931	0.752592	0.561125	0.0480801	0.233132	0.569239	0.354884	-0.16756	0.176195	0.131892	0.0175732	0.188373	0.17063	0.343465	-0.365579	0.0162081	-0.299273	-0.17158	0.1273	0.395656	0.0045522	0.11193	0.207618	0.215412	-0.47295	-0.581	0.128388	-0.122579	-0.0864896	-0.384484	-0.237635	-0.331574	-0.291004	-0.463472	-0.387324
CAPN3	black	0.121716	0.0623535	-0.185276	0.244678	0.112275	0.638985	0.389342	0.906772	0.613697	0.0341734	0.120423	0.470549	0.0441527	-0.121579	-0.081087	0.0107456	-0.245736	0.138261	0.322637	0.528374	-0.26976	0.300133	-0.00521669	-0.109064	0.236371	0.27246	0.0724365	0.402563	0.247307	-0.089707	-0.203517	-0.387668	0.105026	0.0144981	-0.0352086	-0.625783	-0.578746	-0.502986	-0.341891	-0.268412	-0.481852
RFFL	black	-0.150903	0.418951	0.34759	0.481907	0.531378	0.626825	0.562383	0.744858	0.756602	0.0285816	0.0592695	0.342199	0.0623311	-0.0641835	0.253818	0.360656	0.0574166	0.0793834	0.0716291	0.290662	-0.60228	-0.139585	-0.383328	-0.312979	0.0328891	0.30481	-0.205473	0.100939	0.225123	-0.212187	-0.379662	-0.424703	-0.104233	-0.0752257	-0.263805	-0.512684	-0.607893	-0.292982	-0.267652	-0.191272	-0.259742
TSPAN15	black	0.00727152	-0.138327	-0.184412	0.292496	0.0592386	0.499868	0.3095	0.797936	0.588287	-0.122058	0.0754634	0.531225	0.309335	-0.00374369	0.117154	0.211127	0.0344704	-0.00143685	0.191692	0.50787	-0.253125	0.284839	0.0445499	-0.10216	0.195435	0.347088	0.227247	0.42184	0.418607	0.0964266	-0.419355	-0.563732	0.0293208	-0.263703	-0.136206	-0.472935	-0.47808	-0.431883	-0.331524	-0.382224	-0.356559
SOX10	black	0.0367879	0.0106004	-0.260308	0.104326	0.00453768	0.672348	0.328924	0.762603	0.587532	-0.279132	-0.23101	0.249691	-0.0249026	-0.204991	-0.112939	0.106689	0.0050734	0.247379	0.530865	0.662855	-0.121432	0.380955	0.124295	-0.141118	0.0956514	0.244493	0.188594	0.314937	0.241969	0.265455	-0.147898	-0.399503	0.0354358	-0.233066	-0.271062	-0.443411	-0.483559	-0.507127	-0.548239	-0.467706	-0.319672
TPTEP1	black	-0.132232	0.123145	-0.0182818	0.40052	0.251379	0.518002	0.411606	0.699774	0.579391	0.0353167	0.14039	0.396056	0.0247657	-0.27563	0.0533156	0.202739	-0.0668781	-0.00071379	0.0969463	0.331993	-0.35614	0.0465087	-0.183498	-0.15428	0.302373	0.298552	-0.0121513	0.237012	0.278567	-0.131586	-0.238323	-0.329981	0.0246365	-0.0278735	-0.207087	-0.35924	-0.446555	-0.30852	-0.330577	-0.296653	-0.231106
CHADL	black	0.0371215	0.0644767	-0.301883	0.124474	-0.0075726	0.707917	0.40169	0.815499	0.48562	-0.0612442	-0.0388609	0.365564	0.00108723	-0.239163	-0.201187	-0.0572152	-0.278694	0.226843	0.593932	0.732453	-0.0418492	0.500791	0.124917	-0.189883	0.110712	0.193301	0.0524064	0.426417	0.210901	0.0480941	-0.236921	-0.419817	0.155721	-0.0588836	-0.0857937	-0.448977	-0.446501	-0.494998	-0.443922	-0.38154	-0.399358
SGK2	black	-0.0596909	0.0516802	0.0978417	0.305861	0.222163	0.499317	0.344876	0.816297	0.664743	0.0268049	0.227303	0.628676	0.401789	-0.0602474	0.282838	0.249558	0.089599	-0.00163211	0.0709605	0.31931	-0.427608	0.0254211	-0.208819	-0.174528	0.239852	0.298678	0.0533733	0.185742	0.273606	0.197266	-0.374437	-0.435014	0.10066	-0.129231	-0.0116586	-0.604591	-0.468069	-0.405017	-0.237516	-0.451052	-0.494552
RNF125	black	-0.118703	0.158778	0.182116	0.270856	0.276784	0.434192	0.256346	0.758912	0.667232	0.0217779	0.188031	0.578433	0.293552	-0.192936	0.182415	0.212105	0.0890611	0.140891	0.0600585	0.15445	-0.48251	-0.0982755	-0.362085	-0.15815	0.416012	0.372068	-0.0124572	0.0510282	0.158309	0.104207	-0.2033	-0.330715	0.105239	0.0854053	0.194159	-0.739823	-0.400382	-0.343496	-0.00282343	-0.280123	-0.693569
PLLP	black	0.0895432	-0.168649	-0.272457	0.177268	-0.0211637	0.570038	0.265913	0.823873	0.628101	-0.250815	-0.0384531	0.477939	0.241235	-0.0684123	0.0584339	0.192036	0.0696144	0.155692	0.370016	0.582414	-0.196483	0.360283	0.12625	-0.0869972	0.20557	0.326313	0.313444	0.432508	0.416729	0.245294	-0.280864	-0.499965	0.0878481	-0.314439	-0.112959	-0.560126	-0.488328	-0.492474	-0.437573	-0.542967	-0.409586
FA2H	black	-0.0473836	0.159018	-0.111487	0.322372	0.248701	0.754451	0.500814	0.935677	0.724584	-0.0464118	-0.0105751	0.374273	-0.0953616	-0.180361	-0.0518944	0.136471	-0.153784	0.115447	0.350007	0.577602	-0.345683	0.262212	-0.0334484	-0.174058	0.216309	0.304588	0.030936	0.369011	0.265728	-0.0958837	-0.143556	-0.373956	0.104884	-0.0384287	-0.181237	-0.664701	-0.675633	-0.495519	-0.371427	-0.29685	-0.464595
SEC14L5	black	-0.0559405	0.29891	0.216491	0.41591	0.459022	0.679326	0.529067	0.840075	0.8156	0.18279	0.311234	0.601307	0.221993	0.102735	0.361754	0.342178	0.0579999	-0.0330681	0.0641448	0.34659	-0.602152	-0.0776508	-0.33345	-0.216555	0.18695	0.178978	-0.0156169	0.179033	0.26705	-0.062075	-0.370294	-0.37044	-0.0564645	-0.0838766	-0.177491	-0.716648	-0.649454	-0.48998	-0.294386	-0.368621	-0.550301
CPPED1	black	-0.0323307	0.0945266	-0.0395098	0.401783	0.261445	0.669007	0.450758	0.826269	0.749643	-0.243514	-0.0917505	0.428188	0.146016	-0.223164	0.0500633	0.306127	0.037669	0.171932	0.304964	0.525081	-0.405872	0.197889	-0.15433	-0.153958	0.219223	0.44156	0.102101	0.381858	0.423755	0.0402997	-0.387817	-0.497885	-0.0193216	-0.206665	-0.0751246	-0.659887	-0.581759	-0.461153	-0.333369	-0.351254	-0.483484
APLP1	black	-0.0365496	0.238342	-0.153967	0.478276	0.380029	0.916176	0.691567	0.84174	0.783351	-0.0939137	-0.0312194	0.314008	-0.129163	-0.0908493	-0.00421935	0.321997	-0.0967478	0.0323329	0.399545	0.758697	-0.432345	0.297394	-0.0442163	-0.115212	0.135693	0.276045	0.129547	0.514436	0.472533	-0.289657	-0.279492	-0.45383	-0.0816171	-0.260832	-0.47169	-0.620609	-0.805437	-0.619508	-0.628247	-0.324243	-0.374728
MAG	black	-0.0866451	0.13779	-0.0535429	0.389053	0.24439	0.687975	0.501477	0.929845	0.69218	-0.0188311	0.0545985	0.440541	0.0787227	-0.14652	0.0284233	0.176523	-0.139954	0.098618	0.269382	0.549641	-0.367204	0.236483	-0.071602	-0.216857	0.156028	0.371923	-0.00881811	0.394577	0.344416	-0.0891388	-0.358058	-0.516197	0.0901191	-0.126281	-0.178276	-0.575834	-0.618951	-0.408354	-0.335352	-0.288663	-0.358271
HPN	black	-0.0105245	0.051635	-0.265329	0.261914	0.098473	0.709952	0.460283	0.830425	0.563577	-0.0696899	-0.0414485	0.357139	-0.0815214	-0.203528	-0.152085	0.0273594	-0.24929	0.0420118	0.399164	0.676189	-0.144803	0.427777	0.037015	-0.2602	0.0496048	0.242894	0.0614138	0.460417	0.279236	-0.0979711	-0.263633	-0.457022	0.063212	-0.0701666	-0.178612	-0.436113	-0.511268	-0.473431	-0.390393	-0.296524	-0.372873
ABCA2	black	-0.153953	0.5522	0.269468	0.420666	0.516949	0.788259	0.676831	0.850279	0.706531	0.313787	0.282748	0.479481	0.0384045	-0.132669	0.186479	0.195295	-0.163538	0.143461	0.247926	0.444151	-0.558086	-0.0648449	-0.442258	-0.392778	0.0146589	0.233785	-0.276948	0.0956373	0.109792	-0.210303	-0.393606	-0.40493	0.0240535	0.0747499	-0.254844	-0.54168	-0.598874	-0.415027	-0.349691	-0.203354	-0.400133
ASPA	black	-0.0348109	0.0853839	0.0604391	0.141092	0.164403	0.3889	0.208284	0.726825	0.547921	0.141599	0.335601	0.625066	0.318507	-0.0894886	0.12185	0.0738405	-0.0210915	0.133664	0.0975975	0.174418	-0.369779	-0.0200472	-0.184917	-7.2e-06	0.642938	0.234065	0.066291	0.0922986	0.10569	0.11797	-0.164306	-0.240793	0.264386	0.122222	0.204722	-0.695586	-0.369192	-0.450899	-0.170193	-0.293099	-0.6487
CYTH1	black	-0.0624626	0.24739	0.0452378	0.241105	0.305979	0.693018	0.445448	0.815472	0.755282	0.0299715	0.110403	0.422731	0.0531171	0.0734221	0.17032	0.24563	0.0503167	0.114841	0.282928	0.463558	-0.423172	0.0653362	-0.132047	-0.276887	0.136956	0.114718	0.0789645	0.180531	0.193276	-0.0392183	-0.185218	-0.308493	-0.0509728	-0.0508143	-0.293902	-0.592314	-0.648744	-0.44227	-0.366652	-0.305274	-0.366587
CDR2L	black	-0.169037	0.278472	-0.119583	0.383707	0.298195	0.828702	0.633191	0.794123	0.606455	-0.0691974	-0.13466	0.131241	-0.297407	-0.365705	-0.189998	0.118295	-0.272418	0.149382	0.461858	0.684494	-0.272226	0.327096	-0.0319652	-0.339227	0.118937	0.307192	-0.149358	0.386262	0.250756	-0.200757	-0.0783903	-0.325123	0.108027	-0.00100361	-0.287414	-0.490897	-0.655307	-0.295739	-0.363203	-0.14592	-0.161587
PMP22	black	0.0567838	-0.108439	-0.290438	0.165779	-0.0507783	0.527171	0.26952	0.769853	0.520578	-0.216693	-0.140769	0.208556	-0.082687	-0.110205	-0.166493	0.0269518	-0.163712	0.118362	0.298167	0.518154	-0.117029	0.370533	0.117947	-0.100416	0.00959513	0.308718	0.134583	0.431604	0.306594	-0.0865167	-0.16472	-0.414175	0.101301	-0.206387	-0.173453	-0.355163	-0.436156	-0.262309	-0.30428	-0.393039	-0.191394
TFEB	black	0.0769009	0.00354002	-0.34709	0.110281	-0.010021	0.693382	0.353783	0.768062	0.564233	-0.121789	-0.0922509	0.241847	-0.117345	-0.0419237	-0.138993	0.0445243	-0.119984	0.195044	0.530523	0.709177	-0.125095	0.411619	0.136565	-0.124405	0.0677457	0.179817	0.230192	0.388952	0.246489	-0.123993	-0.125427	-0.324427	0.015319	-0.195839	-0.419733	-0.338934	-0.558141	-0.533312	-0.575586	-0.279743	-0.222675
AMOTL2	black	-0.0809711	0.280407	0.148322	0.156737	0.260805	0.599898	0.345439	0.8291	0.687886	0.133247	0.193076	0.538203	0.190697	-0.118987	0.14799	0.120348	0.00102366	0.205484	0.294348	0.337162	-0.395596	-0.000405441	-0.284319	-0.238617	0.198241	0.122029	-0.0541775	0.0486929	0.0477641	0.0720329	-0.123462	-0.204454	0.122174	0.173784	0.0745018	-0.690962	-0.502887	-0.41179	-0.180979	-0.372385	-0.601754
FRMD4B	black	-0.0199816	0.0375206	0.0588794	0.311231	0.244492	0.542659	0.293016	0.878089	0.826789	-0.10085	0.151355	0.620766	0.326837	-0.0499548	0.253587	0.345736	0.210045	0.155674	0.157626	0.318184	-0.505635	0.0028111	-0.210426	-0.117593	0.479173	0.378521	0.20051	0.20925	0.347009	0.0826979	-0.279169	-0.392408	0.0536676	-0.120286	-0.0265621	-0.747626	-0.559426	-0.479658	-0.285404	-0.427514	-0.585294
RTKN	black	-0.000441556	0.00850208	-0.243472	0.207927	0.0461329	0.662751	0.369908	0.795312	0.622688	-0.158664	-0.0786569	0.289213	-0.0312501	-0.219252	-0.0572291	0.1291	-0.0361855	0.233905	0.413934	0.603818	-0.23656	0.287835	-0.025978	-0.170585	0.125166	0.40117	0.166941	0.322544	0.291341	0.00568516	-0.199546	-0.40279	0.10328	-0.213071	-0.326679	-0.374984	-0.456233	-0.409902	-0.451239	-0.334051	-0.273964
TRIM62	black	-0.14573	0.19819	0.0010003	0.204639	0.172407	0.624823	0.407393	0.740217	0.537316	-0.0116228	0.125749	0.521787	0.234154	-0.338139	0.00509274	0.0797925	-0.0794468	0.262067	0.351387	0.472099	-0.306931	0.158085	-0.230405	-0.177373	0.305859	0.384987	-0.035927	0.181502	0.174053	0.373184	-0.372884	-0.518329	0.188457	-0.0339604	0.0506503	-0.598844	-0.326356	-0.492364	-0.316	-0.404451	-0.606273
ARHGEF2	black	-0.0845141	0.425132	0.10012	0.352658	0.446611	0.857749	0.6523	0.861047	0.783603	0.140098	0.169741	0.45954	0.00798247	-0.0472179	0.128777	0.230387	-0.0939132	0.0662253	0.326522	0.573914	-0.48382	0.103178	-0.201136	-0.231644	0.163546	0.0881287	-0.0548105	0.251043	0.206249	-0.106693	-0.256214	-0.338363	-0.0027757	-0.0164983	-0.286047	-0.670348	-0.71909	-0.615149	-0.530135	-0.3705	-0.507091
CDK18	black	-0.0907215	0.348251	-0.0123028	0.501738	0.431774	0.816544	0.693423	0.863	0.67169	0.126377	0.0907415	0.328974	-0.192886	-0.268956	-0.03355	0.16531	-0.291669	0.0245417	0.297122	0.578295	-0.413182	0.179222	-0.184973	-0.376992	0.105103	0.254279	-0.171535	0.348558	0.246545	-0.283954	-0.175111	-0.328121	0.0225205	0.0971275	-0.23484	-0.577641	-0.723886	-0.394648	-0.355792	-0.0996563	-0.307693
CDC20	black	0.0153349	0.200082	0.0405054	0.231884	0.231915	0.596653	0.382702	0.718316	0.606956	0.0122267	0.151231	0.533737	0.280808	-0.17562	0.127383	0.155908	-0.0154111	0.156596	0.306101	0.436219	-0.351168	0.115806	-0.212859	-0.00756674	0.0728365	0.196905	0.0745905	0.214591	0.21188	0.133977	-0.246638	-0.382883	-0.0965497	-0.024941	0.0224829	-0.614399	-0.438232	-0.507148	-0.263868	-0.376938	-0.614683
IPO13	black	-0.0471947	0.34568	-0.0191545	0.454681	0.411885	0.90395	0.701476	0.901956	0.772717	0.0429294	0.118379	0.480295	0.0457521	-0.0857025	0.0740591	0.257612	-0.124848	0.111955	0.395866	0.702858	-0.455026	0.214661	-0.187511	-0.205578	0.0614284	0.276629	0.027082	0.402299	0.35938	-0.115529	-0.433945	-0.575937	-0.155661	-0.185483	-0.356136	-0.630405	-0.704883	-0.659685	-0.552071	-0.350412	-0.524367
FAAH	black	0.0563772	0.103368	-0.226596	0.31773	0.185929	0.779286	0.546492	0.838116	0.654393	0.0756137	0.19527	0.49801	0.0725964	0.0276921	0.0200386	0.133516	-0.192087	-0.0543925	0.321593	0.688383	-0.308601	0.335337	0.00404913	-0.0498068	0.146723	0.128961	0.188535	0.498237	0.377202	-0.15358	-0.353666	-0.447506	0.0283475	-0.176469	-0.319296	-0.549579	-0.644738	-0.695232	-0.627768	-0.414619	-0.47563
CA14	black	-0.092249	0.0294427	-0.0075487	0.340516	0.21885	0.513893	0.347742	0.845188	0.669686	0.098825	0.306144	0.652378	0.304328	-0.156241	0.197861	0.218557	-0.00232596	-0.0238758	0.0509919	0.318124	-0.460748	0.0558821	-0.188264	-0.108299	0.356696	0.337938	0.110182	0.268132	0.309531	0.0676974	-0.230295	-0.355155	0.143013	0.00661176	0.0556147	-0.724943	-0.539026	-0.411651	-0.189265	-0.391451	-0.56702
ATP10B	black	-0.0951399	0.173585	0.311753	0.311912	0.301442	0.372592	0.274212	0.711046	0.643787	0.157817	0.40461	0.726856	0.564656	-0.037618	0.440214	0.28988	0.18672	0.122882	-0.0625141	0.0841527	-0.580624	-0.256321	-0.476472	-0.159955	0.258209	0.40616	-0.0364592	-0.0448269	0.186006	0.281787	-0.518395	-0.493769	0.0387949	-0.0661931	0.072413	-0.581249	-0.316429	-0.314298	-0.0878262	-0.353027	-0.535719
DEPDC7	black	0.148998	-0.0934629	-0.170294	0.129266	0.0363361	0.452469	0.172721	0.709437	0.588345	-0.114436	0.16063	0.607409	0.366575	-0.0465271	0.111064	0.178758	0.103712	0.140086	0.276342	0.40052	-0.267894	0.207362	-0.0353248	0.0688518	0.312528	0.238494	0.35641	0.327871	0.34693	0.132312	-0.187262	-0.357368	0.0306696	-0.128549	0.115145	-0.686986	-0.392885	-0.550563	-0.286687	-0.527775	-0.680146
LDB3	black	-0.0963326	-0.0051597	-0.0335809	0.330633	0.18233	0.517329	0.36318	0.844328	0.639303	0.127697	0.379802	0.759307	0.390119	-0.101374	0.223194	0.176954	-0.0326474	-0.0972886	0.0343958	0.357326	-0.422151	0.0912485	-0.195955	-0.102301	0.370465	0.283925	0.100837	0.282748	0.310932	0.133886	-0.427293	-0.483528	0.159472	-0.0380151	0.0184533	-0.611525	-0.45728	-0.519082	-0.321141	-0.489725	-0.581563
PLP1	black	-0.077185	0.018669	0.0457373	0.342744	0.253747	0.500098	0.308375	0.855685	0.764668	-0.118866	0.0274696	0.409956	0.0855358	-0.0330275	0.130631	0.276124	0.0888108	0.0705323	0.0724372	0.27658	-0.453302	0.0537015	-0.0901761	-0.128943	0.478263	0.39059	0.0807071	0.251771	0.301265	-0.0564687	-0.135745	-0.299542	0.132078	-0.0953771	-0.0435035	-0.69987	-0.618978	-0.353762	-0.180219	-0.262263	-0.452754
TP53TG5	black	-0.0158047	0.142101	-0.0191694	0.386003	0.268638	0.604555	0.503228	0.791983	0.564387	0.193308	0.313793	0.561935	0.174007	-0.0913692	0.167593	0.163822	-0.154321	-0.0155399	0.149494	0.440544	-0.376091	0.10963	-0.150109	-0.204383	0.196941	0.257184	-0.0212676	0.27226	0.256427	-0.00905333	-0.356921	-0.452671	0.0884346	-0.0582342	-0.165998	-0.492705	-0.519938	-0.409513	-0.35022	-0.276458	-0.340183
MYRF	black	-0.101182	0.362413	0.134337	0.408392	0.383709	0.710322	0.57665	0.910933	0.703162	0.196332	0.248994	0.506245	0.0913701	-0.14234	0.105961	0.157734	-0.183107	0.17371	0.235091	0.443848	-0.505984	0.0325575	-0.311776	-0.320157	0.134413	0.307966	-0.153771	0.231212	0.21345	-0.201038	-0.367585	-0.43156	0.0858327	0.0551216	-0.167607	-0.581876	-0.620001	-0.386765	-0.300694	-0.183002	-0.371885
TMTC4	black	-0.0346738	0.129678	0.0178134	0.490565	0.363136	0.66927	0.534599	0.781473	0.766205	-0.0850673	0.0773279	0.43827	0.143167	0.0383971	0.266908	0.430267	0.112859	-0.015259	0.162584	0.491771	-0.501645	0.0583241	-0.144085	-0.163231	0.0646165	0.285497	0.110273	0.316715	0.437045	-0.140653	-0.37547	-0.473629	-0.159115	-0.249755	-0.348969	-0.510179	-0.704487	-0.383626	-0.420352	-0.302501	-0.204258
HSPA2	black	0.0119899	0.165228	-0.0427525	0.331279	0.238781	0.673361	0.43999	0.842018	0.714042	-0.110653	-0.0421233	0.319137	-0.00621131	-0.0911748	0.019215	0.216028	-0.00414997	0.227155	0.317288	0.499792	-0.401314	0.13403	-0.173285	-0.155119	0.153741	0.45454	0.0794952	0.266381	0.298941	-0.149364	-0.284667	-0.471085	-0.0326449	-0.189449	-0.256798	-0.515323	-0.524922	-0.394578	-0.314203	-0.256208	-0.3987
PLEKHG3	black	0.00586587	0.286709	0.190632	0.172093	0.223321	0.524033	0.362495	0.830338	0.564173	0.319435	0.375185	0.634734	0.299422	-0.0457184	0.169155	-0.0152661	-0.169505	0.136836	0.161298	0.275743	-0.377772	-0.0235276	-0.315474	-0.191206	0.185705	0.113463	-0.164765	0.0277548	-0.0264384	0.114102	-0.333057	-0.296964	0.177228	0.19802	0.101363	-0.567956	-0.402097	-0.413766	-0.198301	-0.2634	-0.539722
EVI2A	black	0.0403178	-0.0820204	-0.136501	0.32912	0.17959	0.540104	0.275664	0.831604	0.783103	-0.315009	-0.144916	0.336486	0.0185074	-0.0429355	0.0405124	0.321434	0.139736	0.13496	0.201423	0.397634	-0.390071	0.187607	0.0279183	-0.0425689	0.411626	0.46865	0.282534	0.396891	0.447436	-0.108466	-0.127097	-0.351786	0.0200291	-0.262164	-0.130048	-0.706867	-0.620996	-0.421198	-0.253485	-0.300604	-0.478861
SRD5A3	black	-0.104674	0.07153	-0.088594	0.529938	0.371801	0.69433	0.535105	0.769797	0.778445	-0.166091	0.0403126	0.481171	0.154128	-0.0535117	0.155197	0.439408	0.106588	-0.073725	0.157614	0.546416	-0.53617	0.136436	-0.172472	-0.0599957	0.235803	0.460389	0.227132	0.450373	0.557646	-0.19354	-0.397269	-0.548513	-0.150005	-0.313793	-0.323306	-0.671757	-0.710944	-0.533262	-0.407842	-0.302743	-0.487142
GAL3ST1	black	0.0467076	-0.113747	-0.363357	0.0535557	-0.110883	0.617505	0.284389	0.802966	0.490312	-0.131323	-0.0495868	0.402742	0.0780498	-0.233105	-0.151503	-0.040713	-0.158967	0.141782	0.498315	0.66327	-0.0401056	0.485974	0.208041	-0.0993625	0.285415	0.16912	0.180179	0.409158	0.234793	0.257508	-0.11574	-0.31355	0.304114	-0.0862757	-0.0460368	-0.514764	-0.450145	-0.527793	-0.481067	-0.499367	-0.409597
CDC42EP1	black	0.00552609	0.103317	-0.312779	0.299393	0.106172	0.783629	0.546222	0.846307	0.546943	-0.0969581	-0.0988489	0.221738	-0.173472	-0.205687	-0.223467	0.0412839	-0.301092	0.161058	0.519614	0.779806	-0.156639	0.465594	0.134725	-0.204587	0.0792604	0.264849	0.0516203	0.512643	0.329878	-0.199359	-0.20964	-0.453067	0.0991734	-0.141366	-0.365454	-0.389698	-0.622695	-0.450677	-0.537455	-0.210555	-0.159735
HOXD1	black	0.0571122	0.0194825	-0.100568	0.285985	0.1735	0.590488	0.319702	0.863147	0.710456	-0.0941038	0.105875	0.563565	0.234434	-0.128322	0.0957244	0.240504	0.0559446	0.146572	0.278978	0.452659	-0.354335	0.17573	-0.11036	-0.110605	0.371781	0.376204	0.209309	0.319598	0.363761	0.0790533	-0.279404	-0.448291	-0.0178521	-0.146543	0.0132865	-0.695098	-0.497582	-0.556604	-0.309281	-0.43264	-0.6341
RNASE1	black	0.0100876	-0.0305887	-0.218919	0.206979	0.0438018	0.596443	0.327961	0.891469	0.626786	-0.16621	-0.0689631	0.355215	0.0145472	-0.0956149	-0.134171	0.0390019	-0.160452	0.198516	0.360445	0.541222	-0.185391	0.380923	0.138277	-0.152573	0.290912	0.316516	0.108165	0.456285	0.300509	-0.0233226	-0.196001	-0.424615	0.161452	-0.105217	-0.0397687	-0.573229	-0.55011	-0.430276	-0.285468	-0.298897	-0.40811
CDKN1C	black	-0.0661059	-0.0321528	-0.378738	0.402293	0.133026	0.745218	0.498341	0.709877	0.599741	-0.314415	-0.198832	0.228432	-0.120109	-0.367414	-0.160144	0.27469	-0.0741704	0.160661	0.464812	0.755468	-0.247445	0.444262	0.080261	-0.0890055	0.199836	0.539113	0.257216	0.597936	0.572861	-0.173681	-0.259262	-0.517074	0.0655064	-0.362687	-0.354994	-0.475433	-0.567372	-0.479483	-0.535654	-0.31894	-0.27598
DOHH	black	-0.0842593	0.159463	-0.296585	0.287242	0.150757	0.772514	0.564102	0.729696	0.465598	-0.0829943	-0.19128	0.0763639	-0.367521	-0.298065	-0.331972	-0.0181942	-0.409306	0.109823	0.560736	0.777907	-0.0286856	0.595383	0.283164	-0.320569	0.164266	0.12318	-0.0702174	0.581544	0.261412	-0.195332	-0.0153992	-0.260211	0.149762	0.00668563	-0.232347	-0.438978	-0.642533	-0.416553	-0.485436	-0.148463	-0.166694
TULP4	black	-0.104918	0.389426	0.156504	0.230109	0.369961	0.633227	0.455108	0.69545	0.629287	0.101441	0.148541	0.389773	0.0388487	-0.111943	0.054109	0.142675	-0.0606857	0.221343	0.348674	0.378937	-0.340366	0.0732492	-0.132004	-0.282116	0.470265	0.0317398	-0.0803684	0.146618	0.0793205	-0.040848	-0.0752153	-0.171044	0.0846273	0.169413	-0.0074138	-0.610383	-0.533053	-0.508609	-0.346005	-0.223001	-0.49847
HAPLN2	black	-0.0668423	0.0786157	-0.249349	0.297378	0.0920013	0.621064	0.43105	0.728734	0.486046	0.00963382	0.0376998	0.255912	-0.112732	-0.204408	-0.127446	0.0578315	-0.245194	0.150928	0.375651	0.584362	-0.192458	0.30501	-0.0338425	-0.306878	0.0656825	0.328671	0.0341339	0.390088	0.297715	-0.312158	-0.260516	-0.390211	0.092829	-0.0885912	-0.352644	-0.23843	-0.447005	-0.30701	-0.386323	-0.154893	-0.134158
PIK3C2B	black	-0.240296	0.501077	0.31509	0.457947	0.526986	0.716373	0.647482	0.81189	0.721295	0.251411	0.281994	0.475566	0.0608641	-0.119298	0.228794	0.225791	-0.129057	0.065112	0.0946734	0.347105	-0.610644	-0.0984693	-0.412857	-0.373903	0.0171187	0.245688	-0.27205	0.13855	0.157374	-0.116664	-0.353023	-0.416892	0.0372481	0.109846	-0.195163	-0.5982	-0.619315	-0.298949	-0.206817	-0.173296	-0.344799
PDE6B	black	0.0474712	0.115257	-0.0296582	0.252058	0.170358	0.518155	0.364544	0.754923	0.531428	0.193687	0.302824	0.565676	0.183731	-0.0881526	0.0822286	0.0718886	-0.159487	0.027218	0.147926	0.35394	-0.288608	0.0828417	-0.208422	-0.244391	0.190878	0.17158	0.0151375	0.213366	0.172487	-0.0657071	-0.322956	-0.310902	0.0772908	0.0214652	-0.034277	-0.481726	-0.41653	-0.372428	-0.258025	-0.304478	-0.391193
PRR5L	black	-0.0788101	0.143702	0.0140185	0.252349	0.198864	0.597453	0.373831	0.899942	0.657812	0.0145383	0.0932275	0.475193	0.0828023	-0.225772	-0.0210571	0.0645553	-0.154406	0.1511	0.244249	0.400131	-0.331051	0.161665	-0.172273	-0.27741	0.368329	0.334235	-0.0797801	0.22809	0.157686	-0.0200601	-0.253855	-0.38834	0.216579	0.0804201	0.0629532	-0.619852	-0.491866	-0.38145	-0.19865	-0.305181	-0.504622
NACAD	black	-0.148041	0.346304	-0.0894975	0.523051	0.416228	0.932652	0.781476	0.856688	0.70097	0.0874968	0.114382	0.380683	-0.0921658	-0.242053	-0.0133132	0.231547	-0.250157	0.026933	0.38359	0.7534	-0.42749	0.265492	-0.147905	-0.228857	0.0825108	0.271476	-0.0499511	0.475713	0.39623	-0.259358	-0.353631	-0.491705	-0.000183649	-0.113062	-0.428386	-0.539882	-0.740333	-0.555841	-0.585843	-0.25954	-0.320338
ERMN	black	0.00472456	-0.179079	-0.1469	0.200173	0.0546085	0.398807	0.134218	0.772346	0.674865	-0.193415	0.0661538	0.527404	0.270625	-0.114455	0.0804209	0.229924	0.164757	0.109445	0.141444	0.28299	-0.340086	0.129542	0.00975963	0.0626713	0.753644	0.400404	0.325195	0.278322	0.346715	0.112613	-0.0940703	-0.256049	0.19555	-0.143954	0.0717609	-0.710506	-0.46587	-0.485589	-0.251875	-0.398345	-0.596491
BIN1	black	0.0861831	-0.0656613	-0.367617	0.366224	0.130028	0.709722	0.487734	0.713685	0.623562	-0.158815	0.0028696	0.349959	0.0169502	0.0728039	0.00790144	0.276206	-0.0336014	-0.0288867	0.372406	0.759066	-0.264381	0.419774	0.17728	-0.0306346	0.178899	0.232515	0.393826	0.618112	0.560792	-0.249227	-0.317224	-0.479582	-0.137249	-0.408641	-0.571222	-0.408767	-0.698032	-0.640258	-0.709903	-0.297886	-0.20753
SLC31A2	black	-0.055798	0.26508	0.146926	0.181138	0.228625	0.58317	0.361525	0.764432	0.633333	-0.0195548	-0.0755143	0.240205	-0.086278	-0.175162	0.0386027	0.0969094	-0.0612829	0.185637	0.250532	0.33645	-0.312957	0.0698156	-0.194109	-0.346285	-0.0484841	0.199853	-0.1888	0.077629	0.0458914	0.0168911	-0.0833706	-0.222388	0.138746	0.0740828	-0.0235773	-0.513459	-0.450595	-0.157057	-0.136761	-0.316552	-0.286195
ENPP2	black	-0.108219	0.203712	0.177331	0.40106	0.372698	0.554813	0.405083	0.846746	0.771307	-0.0254624	0.0358693	0.35582	0.0028044	-0.0834833	0.140766	0.26635	0.00690734	0.0937628	0.0633568	0.251215	-0.521405	-0.0224857	-0.232819	-0.236356	0.241944	0.38122	-0.0873146	0.198408	0.242911	-0.164694	-0.177599	-0.293963	0.0836693	-0.00639113	-0.0617252	-0.67691	-0.626544	-0.261734	-0.114937	-0.207213	-0.404715
TJAP1	black	-0.132303	0.331316	0.104919	0.311693	0.341865	0.67756	0.508321	0.855311	0.671423	0.278632	0.302238	0.525701	0.0439303	-0.168779	0.125079	0.107332	-0.156098	0.0500515	0.172829	0.388694	-0.48326	-0.0171172	-0.348251	-0.255051	0.130696	0.205221	-0.12549	0.113813	0.0893198	-0.158299	-0.225713	-0.283889	0.0873342	0.129059	-0.211229	-0.54639	-0.559498	-0.430029	-0.310617	-0.266783	-0.460511
BTBD16	black	-0.00309083	-0.0962293	-0.186545	0.253614	0.0356058	0.444188	0.284508	0.768599	0.50542	-0.00370832	0.204734	0.569545	0.348119	-0.0751916	0.0656409	0.113136	-0.0679469	0.0575673	0.144895	0.416295	-0.286214	0.204425	0.00377359	0.052582	0.332839	0.372479	0.200185	0.354972	0.351916	0.0741929	-0.406599	-0.513202	0.160643	-0.193878	-0.0974653	-0.476629	-0.394202	-0.425781	-0.327175	-0.304835	-0.396114
GLTP	black	0.0707776	-0.0531146	-0.357377	0.194121	0.0499023	0.710936	0.358183	0.808952	0.659809	-0.344739	-0.278587	0.204759	-0.165874	-0.181344	-0.204352	0.144618	-0.0547618	0.181008	0.511102	0.699642	-0.117838	0.476478	0.187904	-0.146662	0.209531	0.29611	0.268307	0.503911	0.377196	-0.0547379	-0.0449161	-0.347683	0.016969	-0.253874	-0.227673	-0.556708	-0.573558	-0.544987	-0.488271	-0.406028	-0.410542
FAM222A	black	-0.0623333	0.249959	-0.0971498	0.160268	0.196483	0.797493	0.474485	0.861719	0.655652	0.00521518	-0.031334	0.311738	-0.123194	-0.235185	-0.101029	0.0476946	-0.156993	0.223594	0.541184	0.645135	-0.22291	0.307595	-0.0290788	-0.276178	0.203465	0.122032	-0.0198437	0.254825	0.0993448	0.0333489	-0.00121674	-0.215744	0.152337	0.0827466	-0.14713	-0.613151	-0.601001	-0.529322	-0.437869	-0.332002	-0.47462
GALNT6	black	-0.0960835	0.0572325	-0.0660726	0.491713	0.294111	0.58273	0.514567	0.761698	0.627233	0.0164398	0.163371	0.465041	0.156776	-0.103418	0.144743	0.280385	-0.0476416	-0.122781	0.0287651	0.430794	-0.45607	0.0874169	-0.147074	-0.139841	0.238478	0.358324	0.0791756	0.37041	0.425486	-0.131332	-0.338566	-0.473402	0.054822	-0.13008	-0.255689	-0.527031	-0.588575	-0.352095	-0.336619	-0.179583	-0.247754
PCSK6	black	-0.121409	0.370261	0.201025	0.461096	0.45315	0.694347	0.579621	0.842455	0.720479	0.0245098	-0.0148467	0.284651	-0.107352	-0.246473	0.0446171	0.207453	-0.129318	0.11543	0.186214	0.380399	-0.478063	0.0249825	-0.284365	-0.314173	0.181788	0.354159	-0.26342	0.177325	0.167543	-0.140064	-0.206422	-0.340812	0.0477918	0.0340724	-0.123632	-0.602519	-0.621411	-0.321845	-0.242867	-0.156032	-0.371689
TMC6	black	-0.133411	0.335863	-0.00881505	0.402127	0.330102	0.715576	0.60683	0.775674	0.537464	0.162511	0.0559092	0.192629	-0.271777	-0.201049	-0.112936	0.0438608	-0.371376	0.0976328	0.304678	0.53035	-0.297461	0.208821	-0.166196	-0.450784	-0.0659622	0.225721	-0.257367	0.318374	0.157464	-0.37868	-0.171283	-0.300066	0.0727802	0.1408	-0.21164	-0.404053	-0.603873	-0.183898	-0.192775	0.0332205	-0.129794
TTYH2	black	-0.150006	0.381859	0.222876	0.353755	0.389131	0.668992	0.519419	0.835533	0.705295	0.0671149	0.0391547	0.307752	-0.0484941	-0.136223	0.105595	0.185768	-0.0768017	0.178509	0.206912	0.366397	-0.452418	-0.0143975	-0.329599	-0.392512	-0.00227459	0.317756	-0.223991	0.110485	0.130696	-0.119073	-0.280134	-0.393247	0.0342732	-0.000825583	-0.186582	-0.49092	-0.509189	-0.231918	-0.200678	-0.226246	-0.309116
PPAP2C	black	0.00260602	0.0443022	-0.292876	0.289427	0.111484	0.695738	0.432166	0.819769	0.589154	-0.169569	-0.180148	0.162369	-0.256707	-0.196701	-0.248081	0.0667475	-0.245064	0.145698	0.44276	0.661309	-0.16254	0.458948	0.146542	-0.19165	0.0938963	0.291255	0.097029	0.531394	0.337218	-0.25046	-0.0359801	-0.309496	0.0528777	-0.076124	-0.225971	-0.544435	-0.651934	-0.358295	-0.319895	-0.171105	-0.283088
ADC	black	-0.0938291	0.213077	-0.0772357	-0.00731844	0.0630911	0.601433	0.316612	0.709461	0.445299	0.143477	0.140672	0.413575	0.0388364	-0.192978	-0.110531	-0.118082	-0.229205	0.286376	0.465631	0.488609	-0.174972	0.256174	-0.0563232	-0.216741	0.330173	0.167419	-0.0515352	0.148262	-0.0247792	0.057027	-0.159469	-0.207144	0.395822	0.0989424	0.0371052	-0.531755	-0.385857	-0.513476	-0.309972	-0.270197	-0.537928
DOCK5	black	-0.0240565	0.257818	0.124584	0.380677	0.345562	0.57103	0.422073	0.771226	0.702944	0.0735171	0.242853	0.51856	0.203697	-0.144709	0.193517	0.275327	0.0403192	0.272906	0.166118	0.292505	-0.563287	-0.124993	-0.432787	-0.193559	0.267139	0.477037	0.0358064	0.113587	0.266867	-0.175169	-0.388723	-0.440607	-0.0092857	-0.0763949	-0.17939	-0.519886	-0.439353	-0.393925	-0.280179	-0.17063	-0.438609
FAM13C	black	-0.240658	0.410432	0.452237	0.255791	0.452647	0.477539	0.364172	0.725079	0.68672	0.227801	0.260889	0.505749	0.205284	-0.0778938	0.293297	0.188485	0.0525732	0.0682909	0.0315368	0.0926272	-0.521664	-0.19764	-0.417803	-0.289421	0.28095	0.0856893	-0.283766	-0.0884289	-0.0361207	0.0593711	-0.145741	-0.146011	0.128146	0.293865	0.161102	-0.682869	-0.469036	-0.308498	-0.0518926	-0.274039	-0.581887
NKX6-2	black	0.0435214	0.00657165	-0.424775	0.210815	-0.0261241	0.707846	0.430095	0.795482	0.453483	-0.154672	-0.187207	0.142368	-0.250167	-0.281604	-0.376839	-0.0739685	-0.38534	0.271145	0.612741	0.771485	0.00309773	0.593365	0.249814	-0.252187	0.214528	0.304592	0.0579288	0.568406	0.299835	-0.172358	-0.135202	-0.362373	0.179567	-0.0976025	-0.216492	-0.372844	-0.524781	-0.395358	-0.462231	-0.132611	-0.160437
FEZ1	black	0.104743	-0.0479847	-0.363935	0.178799	0.0115417	0.607277	0.346365	0.764439	0.502555	-0.168763	-0.118184	0.229621	-0.148967	-0.0638932	-0.280274	-0.0313368	-0.279259	0.132946	0.433097	0.617967	-0.0350719	0.523327	0.308776	-0.151784	0.39171	0.171488	0.13538	0.555043	0.293943	-0.0875756	-0.105583	-0.308233	0.152713	-0.100577	-0.0653481	-0.509245	-0.558454	-0.509071	-0.388464	-0.246504	-0.374748
KIAA1755	black	0.0476194	0.11926	-0.168536	0.0907371	0.0539422	0.632472	0.349925	0.804688	0.519704	0.172015	0.27592	0.575164	0.172999	-0.098309	-0.0202243	-0.0611235	-0.202616	0.163627	0.425138	0.555808	-0.167783	0.29621	-0.0712202	-0.0763414	0.234796	0.0755672	0.105003	0.278812	0.115773	0.0116761	-0.233767	-0.322739	0.175886	0.0705271	-0.0387354	-0.477932	-0.374636	-0.657271	-0.447787	-0.432834	-0.637512
CDC42EP2	black	-0.034308	0.101258	-0.262979	0.340921	0.168114	0.801594	0.5215	0.841057	0.6652	-0.211148	-0.155815	0.238009	-0.143618	-0.257595	-0.181937	0.152689	-0.168446	0.195297	0.480596	0.718952	-0.272091	0.369202	-0.0147658	-0.149561	0.144901	0.425045	0.11212	0.461113	0.377514	-0.171675	-0.206658	-0.468012	-0.0141088	-0.219262	-0.313216	-0.547097	-0.618813	-0.430264	-0.43092	-0.28957	-0.341015
FAM124A	black	0.00859145	0.133025	-0.0450431	0.317032	0.291594	0.733316	0.437612	0.910597	0.852535	-0.0873105	0.0743955	0.513971	0.113565	-0.0505011	0.149018	0.306362	0.0929857	0.110922	0.282687	0.506368	-0.493941	0.10284	-0.166362	-0.0888267	0.282039	0.324006	0.203998	0.271962	0.328862	-0.0533254	-0.213525	-0.389241	-0.0589681	-0.17601	-0.235977	-0.736326	-0.682398	-0.602323	-0.437115	-0.427439	-0.578413
CNDP1	black	-0.00849419	0.100305	-0.0439508	0.428943	0.25137	0.586875	0.441264	0.809717	0.660704	-0.10883	-0.0315505	0.309401	-0.0363396	-0.141344	-0.00198546	0.206241	-0.128271	0.0749679	0.182562	0.430469	-0.36475	0.184962	-0.0923584	-0.264469	0.0439045	0.361698	-0.0213131	0.398503	0.364529	-0.202294	-0.269649	-0.406107	-0.0159747	-0.0828739	-0.118393	-0.540999	-0.634153	-0.261138	-0.207257	-0.196207	-0.253298
ANO4	black	-0.137041	0.402216	0.178758	0.30363	0.407359	0.678469	0.518327	0.784095	0.662872	0.0745346	0.0719268	0.393151	-0.0272534	-0.294186	0.0342954	0.119869	-0.144248	0.204277	0.269118	0.364819	-0.427027	0.0481424	-0.229038	-0.26509	0.219233	0.221211	-0.222871	0.147376	0.0784238	0.0558794	-0.168745	-0.295135	0.157335	0.159114	0.0160987	-0.698588	-0.572954	-0.444642	-0.257944	-0.212219	-0.530766
RASGRP3	black	-0.0253688	0.0942728	-0.00887991	0.308301	0.24294	0.536581	0.336449	0.798343	0.658372	-0.0954648	0.0206631	0.451287	0.108601	-0.237136	-0.0111109	0.15843	-0.0518986	0.139733	0.224807	0.353141	-0.330237	0.173146	-0.0572436	-0.115266	0.559615	0.347417	0.0259302	0.29899	0.257117	0.072393	-0.153359	-0.327706	0.130507	0.02048	0.145575	-0.742985	-0.515926	-0.456573	-0.204838	-0.268281	-0.603379
CNTNAP4	black	-0.158661	0.298872	0.233995	0.37698	0.395748	0.569025	0.467631	0.7685	0.627	0.141581	0.188334	0.490542	0.140842	-0.271675	0.13218	0.154668	-0.108597	0.0486482	0.144651	0.294421	-0.433099	0.0185927	-0.25582	-0.250366	0.349569	0.267453	-0.239871	0.13341	0.109014	0.0273788	-0.204521	-0.294602	0.125932	0.196921	0.144752	-0.650472	-0.530173	-0.366857	-0.135369	-0.202046	-0.50203
C10orf90	black	-0.0543746	0.159827	0.0486557	0.303144	0.277478	0.655113	0.40735	0.888661	0.788942	-0.0277007	0.149117	0.591536	0.222934	-0.125565	0.188799	0.260226	0.0947534	0.13911	0.210757	0.412632	-0.5134	0.00760713	-0.29775	-0.151716	0.268716	0.370827	0.10353	0.165428	0.262679	0.104317	-0.340763	-0.445516	0.0435075	-0.100352	-0.162228	-0.654495	-0.550424	-0.548412	-0.411189	-0.45407	-0.570366
PDE1C	black	-0.114676	0.269728	0.219578	0.301129	0.369572	0.57463	0.381359	0.822392	0.777138	0.0739495	0.196776	0.511938	0.163026	-0.13381	0.243636	0.273422	0.114361	0.208095	0.150796	0.239731	-0.546688	-0.131316	-0.393782	-0.32785	0.293203	0.355382	-0.0194026	0.0404634	0.159775	-0.0543963	-0.191599	-0.292791	0.0984742	0.0705374	-0.0321937	-0.638144	-0.486815	-0.330197	-0.17028	-0.280369	-0.490893
PIEZO2	black	-0.0761608	0.315134	0.133302	0.404728	0.428758	0.668219	0.512325	0.862677	0.772009	0.0806378	0.146694	0.443163	0.00188039	-0.0806659	0.102349	0.231655	-0.0724338	0.139187	0.169864	0.355418	-0.523206	-0.00315615	-0.262099	-0.213997	0.335438	0.290841	-0.073398	0.21779	0.22382	-0.219669	-0.245452	-0.328635	0.0469851	0.0538615	-0.122915	-0.697161	-0.651426	-0.426961	-0.255521	-0.139534	-0.478569
DPYSL5	black	-0.0279285	0.373574	-0.0170146	0.289667	0.363292	0.825929	0.58467	0.823869	0.700251	0.0485486	0.0231053	0.315701	-0.170113	-0.146067	-0.0603218	0.121145	-0.190213	0.135683	0.431895	0.589808	-0.343331	0.211431	-0.0974397	-0.248927	0.160522	0.0817948	-0.0486596	0.293986	0.158114	-0.145421	-0.083417	-0.242941	0.000740477	0.0897508	-0.199654	-0.654993	-0.70251	-0.590178	-0.471341	-0.276405	-0.488508
LDLRAP1	black	0.000234082	0.14382	-0.0867592	0.217473	0.192489	0.621374	0.378893	0.827734	0.633508	0.0359169	0.0694676	0.411247	-0.0216242	-0.220393	-0.0343117	0.0508531	-0.18834	0.111795	0.28969	0.428428	-0.320366	0.195188	-0.0776692	-0.153383	0.246293	0.194824	-0.019175	0.281161	0.163055	-0.0370146	-0.0629464	-0.190132	0.214445	0.102153	-0.000231646	-0.694237	-0.590337	-0.455991	-0.281725	-0.326797	-0.527453
SHROOM4	black	-0.260819	0.405627	0.314285	0.346797	0.39972	0.56478	0.483715	0.772529	0.611387	0.150875	0.142655	0.380604	0.0639067	-0.22095	0.104645	0.126673	-0.141841	0.129084	0.107427	0.250557	-0.440922	-0.0692944	-0.393575	-0.464324	0.0261189	0.265682	-0.351046	0.054559	0.057814	-0.0464137	-0.269915	-0.362872	0.0793797	0.170854	0.0429897	-0.529949	-0.449527	-0.0879592	0.0116817	-0.192658	-0.31193
SLC45A3	black	-0.073031	0.272081	0.0131737	0.501667	0.408181	0.774699	0.630444	0.916467	0.761672	0.0349551	0.0851053	0.41812	-0.0365004	-0.156433	0.0873983	0.262217	-0.132147	0.0657106	0.220157	0.526019	-0.505323	0.109013	-0.21121	-0.284238	0.0971023	0.393508	-0.0601048	0.341583	0.347732	-0.240588	-0.333075	-0.495274	0.0313561	-0.106718	-0.288901	-0.603564	-0.692927	-0.41899	-0.373655	-0.255227	-0.361778
SLC5A11	black	-0.128314	0.212161	-0.0600468	0.616283	0.430943	0.704139	0.665472	0.741288	0.631982	0.0418783	0.0823514	0.309386	-0.153487	-0.262089	0.038868	0.28667	-0.18269	-0.114027	0.115942	0.498569	-0.463725	0.124005	-0.201931	-0.313751	0.10161	0.395315	-0.06031	0.40563	0.406715	-0.324844	-0.268604	-0.414727	-0.0492493	-0.0702074	-0.320737	-0.480488	-0.647823	-0.332097	-0.311183	-0.116878	-0.252908
ICOSLG	black	-0.125509	0.28992	0.0303785	0.523668	0.394188	0.731727	0.661129	0.813929	0.618225	0.0567328	0.0857411	0.364659	-0.00886765	-0.256339	0.0222644	0.206378	-0.226919	0.0367737	0.204451	0.535849	-0.430936	0.154516	-0.16264	-0.193397	0.0736309	0.335618	-0.143036	0.385866	0.342809	-0.0939677	-0.331675	-0.486257	0.0194113	-0.0608701	-0.245582	-0.551326	-0.651765	-0.341738	-0.348485	-0.141625	-0.235771
SIK3	black	-0.0599011	0.438928	0.301121	0.259632	0.385573	0.622514	0.492992	0.697349	0.649262	0.295364	0.451583	0.655742	0.412037	0.0193971	0.36384	0.230706	0.0564452	0.168949	0.170358	0.317942	-0.553817	-0.19184	-0.494009	-0.165152	0.0841841	0.111531	-0.0696867	-0.019233	0.116692	0.0586895	-0.496264	-0.431372	-0.0379952	-0.0268889	-0.191684	-0.480336	-0.41582	-0.512251	-0.436145	-0.391303	-0.47023
PAQR4	black	-0.129803	0.333451	-0.0401491	0.403227	0.361897	0.889237	0.684179	0.886139	0.709186	0.0143345	0.0220297	0.357661	-0.100566	-0.234287	-0.0235521	0.175579	-0.1983	0.128547	0.44036	0.70189	-0.355746	0.267634	-0.165985	-0.315197	0.00394277	0.254483	-0.090635	0.37625	0.280792	-0.169506	-0.309879	-0.499442	0.0172137	-0.0574945	-0.291102	-0.525112	-0.629009	-0.510841	-0.480132	-0.338365	-0.411994
RBP7	black	0.139631	-0.256449	-0.437544	0.283496	-0.0752431	0.486574	0.276533	0.720218	0.496896	-0.2369	-0.0387527	0.351646	0.137321	-0.0557685	-0.103375	0.118182	-0.130605	-0.010381	0.224674	0.567848	-0.159621	0.439072	0.259173	0.10347	0.187328	0.357732	0.341274	0.628843	0.546072	-0.0553222	-0.284235	-0.524993	0.0328785	-0.33222	-0.197961	-0.450333	-0.50174	-0.370992	-0.354682	-0.338875	-0.23379
CAPN13	black	-0.0687466	0.253044	0.206343	0.223166	0.265719	0.456361	0.331445	0.727743	0.610452	0.211495	0.270335	0.507234	0.220534	0.0340059	0.228375	0.119076	-0.0146287	0.0384145	-0.00269402	0.180706	-0.461789	-0.100302	-0.297739	-0.110928	0.155976	0.190109	-0.116086	0.0386464	0.0838788	-0.0577518	-0.361586	-0.330129	0.200661	0.0234583	-0.0655039	-0.484483	-0.372051	-0.38177	-0.200807	-0.327458	-0.509904
TMEM144	black	-0.0385281	0.018591	0.0637827	0.393806	0.2758	0.492417	0.33396	0.820706	0.758829	-0.116015	0.068437	0.472522	0.22453	0.0179587	0.248124	0.352439	0.154828	0.0572248	0.0325664	0.279937	-0.532608	-0.0271337	-0.178826	-0.0498616	0.323749	0.469146	0.123196	0.215829	0.366132	-0.102442	-0.313146	-0.429788	0.0611115	-0.241953	-0.167091	-0.622221	-0.577579	-0.347125	-0.226577	-0.303448	-0.41112
2019-09-08	black	-0.119837	0.230269	-0.14951	0.355402	0.277214	0.772156	0.59871	0.808357	0.589281	0.000800639	-0.0388362	0.230452	-0.247702	-0.232966	-0.189521	0.046239	-0.319561	0.0469703	0.390242	0.635712	-0.201237	0.387833	0.096043	-0.273899	0.316853	0.145912	-0.098018	0.462119	0.232954	-0.134007	-0.0670772	-0.275873	0.146579	0.0637478	-0.156484	-0.546703	-0.646678	-0.48092	-0.402968	-0.189836	-0.365272
JAM3	black	0.096339	-0.00585015	-0.195796	0.300922	0.1755	0.687261	0.404623	0.865613	0.796389	-0.197817	-0.0623556	0.364107	-0.0145548	0.0339086	0.0547596	0.28174	0.0515704	0.072964	0.270095	0.548851	-0.391971	0.218255	0.0122778	-0.0851556	0.178125	0.288219	0.266252	0.407705	0.407594	-0.151204	-0.195487	-0.357894	-0.00898429	-0.280558	-0.34685	-0.612328	-0.721027	-0.515936	-0.493965	-0.405933	-0.357213
CMTM5	black	-0.0150755	-0.127688	-0.315947	0.0914952	-0.0977086	0.53317	0.240013	0.803683	0.461372	-0.103866	0.0353814	0.470285	0.198869	-0.178153	-0.145863	-0.0409878	-0.172882	0.159689	0.409322	0.587322	-0.0655276	0.461833	0.183772	-0.0330547	0.376103	0.29997	0.18396	0.427652	0.267696	0.206766	-0.252758	-0.445544	0.261009	-0.135831	0.0421876	-0.534258	-0.378107	-0.514571	-0.35614	-0.417923	-0.504393
CYB5R2	black	0.0450337	0.0721689	-0.119455	0.293864	0.144224	0.601104	0.41524	0.852786	0.598911	0.0465218	0.199083	0.54398	0.234507	-0.0657818	0.0203723	0.0840189	-0.167949	0.101442	0.248541	0.497854	-0.320505	0.230499	-0.0552521	-0.124673	0.262358	0.269802	0.0859662	0.39421	0.319605	0.0277643	-0.336345	-0.474607	0.0882109	-0.0762342	-0.0774365	-0.610533	-0.555808	-0.515057	-0.369664	-0.304779	-0.468944
MTMR10	black	0.138867	-0.0436243	-0.175651	0.0925218	-0.0213156	0.455622	0.141828	0.745868	0.565506	-0.156784	0.00463365	0.380491	0.142773	-0.174044	-0.0892118	0.0812314	0.00351607	0.37134	0.369628	0.365658	-0.215135	0.158829	-0.111726	-0.0875097	0.397724	0.413055	0.194005	0.204159	0.232799	-0.0221584	-0.219573	-0.321215	0.122025	-0.120877	0.0610762	-0.49669	-0.311076	-0.373209	-0.229396	-0.334995	-0.453355
CERCAM	black	-0.0880819	0.375803	0.204073	0.257984	0.310476	0.520789	0.450447	0.76824	0.464389	0.478414	0.544368	0.690563	0.278091	-0.118187	0.142496	-0.0549385	-0.303768	0.057932	0.0981883	0.256023	-0.382831	-0.0418928	-0.379328	-0.265964	0.196664	0.110815	-0.258054	0.0677857	-0.013476	0.00749723	-0.402417	-0.369981	0.178403	0.31217	0.125735	-0.49506	-0.335069	-0.414349	-0.185867	-0.188919	-0.52674
GPD1	black	0.0583599	-0.0472917	-0.175412	0.317222	0.120275	0.542857	0.378231	0.720088	0.528737	-0.0640022	0.165497	0.60774	0.360452	-0.149504	0.0534242	0.162749	-0.076533	-0.0235501	0.230243	0.529466	-0.230401	0.318408	0.0186719	0.0388404	0.332957	0.236343	0.201672	0.486701	0.436726	0.148568	-0.416379	-0.513959	0.0419864	-0.181517	0.0300952	-0.582224	-0.456099	-0.639847	-0.405275	-0.436456	-0.580474
PPP1R14A	black	0.0474103	-0.118116	-0.462252	0.176495	-0.0946528	0.619725	0.36165	0.779869	0.402469	-0.161949	-0.123349	0.282409	-0.0822921	-0.28033	-0.336263	-0.103045	-0.366455	0.127885	0.525041	0.73806	0.0628712	0.650192	0.340745	-0.156953	0.274469	0.235303	0.10258	0.611208	0.318623	0.0331132	-0.178218	-0.4074	0.214699	-0.0845115	-0.0312211	-0.431197	-0.484399	-0.468162	-0.438375	-0.290186	-0.282856
KLK6	black	-0.0732505	0.119072	-0.179328	0.418116	0.240757	0.758304	0.543052	0.922775	0.700559	-0.0940531	-0.0599615	0.301751	-0.131382	-0.212483	-0.116087	0.164349	-0.209381	0.088356	0.34147	0.632804	-0.316813	0.333545	0.00275949	-0.213719	0.169276	0.368365	0.0297968	0.492971	0.382291	-0.215502	-0.20608	-0.434679	0.0507066	-0.110783	-0.252351	-0.597329	-0.694024	-0.438018	-0.387092	-0.222699	-0.356141
PXK	black	-0.129088	0.296265	0.218688	0.501401	0.478979	0.648831	0.541703	0.853799	0.813824	0.0845439	0.186717	0.491705	0.0692745	-0.121623	0.275928	0.359537	0.0240352	0.0199237	0.058287	0.304174	-0.601169	-0.103842	-0.365985	-0.347146	0.104296	0.298682	-0.105424	0.17308	0.274186	-0.191256	-0.267544	-0.347838	-0.0706405	-0.00618155	-0.175411	-0.63138	-0.671222	-0.307555	-0.236048	-0.312262	-0.367632
LGI3	black	-0.243016	0.385609	0.0530202	0.52253	0.482441	0.860616	0.745859	0.814778	0.714869	0.128862	0.103193	0.337367	-0.12491	-0.295557	0.0675508	0.251149	-0.189373	-0.0221814	0.304496	0.612892	-0.465105	0.147005	-0.238771	-0.33699	0.0546648	0.195774	-0.180536	0.329802	0.270857	-0.258999	-0.156778	-0.283864	0.0491684	0.0935309	-0.298691	-0.560215	-0.737966	-0.395564	-0.398854	-0.201629	-0.299848
FEN1	black	-0.00481398	0.23496	0.127327	0.475388	0.409169	0.588628	0.551194	0.689663	0.64598	0.180652	0.440534	0.697175	0.449772	0.146569	0.371684	0.316925	0.0140889	-0.0398955	0.0531331	0.38179	-0.565183	-0.0484613	-0.339295	-0.0994095	0.161624	0.196028	0.0836922	0.289286	0.39238	-0.0773144	-0.575275	-0.575609	-0.131854	-0.122072	-0.194591	-0.543177	-0.528638	-0.56035	-0.37413	-0.273631	-0.500694
SLC20A2	black	0.0700286	0.227983	0.0276904	0.246827	0.262185	0.590748	0.408524	0.69868	0.569455	0.0260344	0.0416988	0.344203	0.00574995	-0.0837594	0.00661328	0.116335	-0.119875	0.137773	0.346095	0.436234	-0.21906	0.220833	-0.0293764	-0.23739	0.167615	0.0900838	-0.0482805	0.282059	0.164691	-0.0828981	-0.166	-0.233579	-0.0415588	0.0764217	0.152194	-0.564184	-0.505594	-0.414387	-0.213351	-0.294984	-0.479678
LDLRAD4	black	0.0444291	0.0759604	-0.0710373	0.163631	0.182298	0.580013	0.323988	0.767355	0.644737	0.010842	0.140373	0.519378	0.154809	0.0432984	0.109679	0.153735	-0.00421908	0.0468298	0.280477	0.432443	-0.297794	0.158693	-0.0133825	-0.149846	0.397603	0.0251017	0.151013	0.223174	0.175409	0.0696902	-0.143958	-0.185535	0.107577	0.0259972	-0.0520674	-0.667369	-0.616526	-0.579623	-0.419268	-0.322749	-0.496455
FAM178B	black	-0.132811	0.0858819	-0.0994559	0.420658	0.242562	0.629586	0.508925	0.821805	0.600526	0.0907704	0.224441	0.548722	0.184693	-0.208179	0.0828213	0.181985	-0.139467	-0.058366	0.184034	0.522357	-0.37317	0.215863	-0.0777994	-0.136242	0.276715	0.29271	0.0423781	0.394675	0.349091	-0.0712641	-0.295404	-0.454069	0.0930158	-0.0282878	-0.136186	-0.538329	-0.57391	-0.436583	-0.346145	-0.322482	-0.381699
SH3TC2	black	-0.163934	0.255919	0.279328	0.407683	0.406509	0.546689	0.444904	0.862175	0.76221	0.194108	0.376828	0.687607	0.35358	-0.0899936	0.347319	0.289296	0.0630575	0.01604	-0.0325946	0.208852	-0.624762	-0.184519	-0.447922	-0.185289	0.322849	0.314512	-0.0775195	0.0694031	0.213663	0.00590488	-0.370965	-0.401079	0.100951	0.0487613	-0.0302641	-0.66467	-0.517315	-0.380872	-0.199482	-0.324155	-0.53169
GJB1	black	0.0589919	0.0347575	-0.216685	0.284698	0.109032	0.687805	0.421616	0.933312	0.651386	-0.131624	-0.0570319	0.381279	-0.00103301	-0.149045	-0.133563	0.0711455	-0.20545	0.178515	0.395644	0.611336	-0.221784	0.382738	0.065902	-0.169772	0.222803	0.343092	0.0778773	0.471439	0.33178	-0.0439569	-0.250361	-0.470964	0.0874499	-0.11109	-0.0767758	-0.62495	-0.592193	-0.466713	-0.323467	-0.290885	-0.449923
FAXDC2	black	-0.0125275	0.145838	0.0276195	0.228316	0.160834	0.590759	0.361184	0.81991	0.636113	0.00253898	0.0817336	0.481042	0.166353	-0.160217	0.0626125	0.0832488	-0.0720751	0.135701	0.252787	0.4236	-0.323324	0.159386	-0.169959	-0.129479	0.0775626	0.307116	-0.0385805	0.213991	0.167494	0.10238	-0.327714	-0.440411	0.0552315	-0.0647358	-0.00184617	-0.549051	-0.410807	-0.397752	-0.183937	-0.467425	-0.558807
TMC7	black	-0.0520586	0.242044	0.162726	0.415318	0.366105	0.593483	0.453321	0.886348	0.734093	0.0732436	0.205002	0.556804	0.207137	-0.0908809	0.159582	0.225123	-0.0687396	0.14192	0.134251	0.317324	-0.500027	-0.00169606	-0.299668	-0.250676	0.239686	0.369637	-0.0980906	0.219036	0.260526	-0.0631764	-0.388205	-0.461286	-0.00308137	0.0202547	0.0749863	-0.711277	-0.572478	-0.34144	-0.128759	-0.266456	-0.515036
GPR37	black	-0.0400193	0.185508	0.167077	0.329644	0.307909	0.54405	0.353814	0.80887	0.757317	-0.130875	-0.0466144	0.342132	0.100664	-0.000912736	0.170579	0.307258	0.12951	0.210493	0.165366	0.306199	-0.459693	0.00101365	-0.21795	-0.259643	0.132135	0.39997	0.0112386	0.174812	0.275575	-0.0561416	-0.288449	-0.416258	-0.0390209	-0.165109	-0.123335	-0.597078	-0.528863	-0.270321	-0.160053	-0.262561	-0.381606
C11orf24	black	0.019407	-0.0443089	-0.348078	0.306327	0.0846641	0.718084	0.475625	0.718394	0.564544	-0.232653	-0.0743882	0.309706	0.0308937	-0.115329	-0.0749195	0.212771	-0.0745281	0.122977	0.455891	0.763418	-0.241616	0.423563	0.115934	-0.117292	0.146712	0.384147	0.274762	0.560942	0.516146	-0.107601	-0.328866	-0.546006	0.0863488	-0.344842	-0.399288	-0.458002	-0.620779	-0.505878	-0.566485	-0.265589	-0.182379
NINJ2	black	0.0180284	0.0923261	-0.171565	0.324314	0.174356	0.750839	0.503782	0.937215	0.687793	-0.0800993	0.00410922	0.428491	0.0451821	-0.153214	-0.0530122	0.119674	-0.164685	0.147669	0.402433	0.658359	-0.289886	0.349136	-0.0068503	-0.198425	0.206431	0.344998	0.0766813	0.452397	0.339862	-0.0632163	-0.322559	-0.503027	0.107499	-0.127179	-0.176539	-0.576809	-0.608588	-0.545467	-0.462968	-0.309652	-0.429284
MAL	black	-0.00247177	-0.0430896	-0.323131	0.127671	-0.0617442	0.588497	0.324952	0.760284	0.47975	-0.145329	-0.0830084	0.214332	-0.0723978	-0.131295	-0.19717	-0.0138519	-0.19996	0.229541	0.411241	0.596919	-0.0846365	0.408677	0.182258	-0.0961122	0.152669	0.306352	0.126155	0.423984	0.277896	-0.0484643	-0.183688	-0.432888	0.226319	-0.204675	-0.254137	-0.328798	-0.412386	-0.316479	-0.388142	-0.302511	-0.155077
CARNS1	black	-0.0756282	0.222997	0.0544242	0.364942	0.295016	0.624581	0.50231	0.894339	0.611781	0.256071	0.408814	0.720243	0.310774	-0.149515	0.144533	0.0989298	-0.201816	0.0486408	0.156479	0.41008	-0.436566	0.0672183	-0.272063	-0.184189	0.29771	0.284225	-0.0795109	0.239425	0.210789	0.0309487	-0.441281	-0.502065	0.132011	0.0776425	0.0391088	-0.639748	-0.499356	-0.487337	-0.279208	-0.297481	-0.56301
NIPAL4	black	0.0178434	0.0936838	-0.0956639	0.257636	0.165055	0.662387	0.387255	0.934463	0.700754	-0.0217375	0.103589	0.527656	0.148388	-0.125264	0.0353638	0.125356	-0.0903586	0.18368	0.331366	0.509344	-0.347011	0.204342	-0.101546	-0.119526	0.264498	0.348895	0.0885974	0.306333	0.269379	0.00685439	-0.285294	-0.459496	0.104545	-0.0649545	-0.0384132	-0.651358	-0.532882	-0.507981	-0.329179	-0.34586	-0.539688
DMRT2	black	0.00922919	-0.00570969	-0.14203	0.332877	0.146911	0.629761	0.384538	0.902454	0.718965	-0.0805798	0.105251	0.552976	0.199326	-0.123035	0.0748777	0.222125	-0.0202176	0.0758561	0.248621	0.502853	-0.363983	0.210441	-0.0523278	-0.110317	0.321697	0.350724	0.183694	0.396238	0.399268	0.0639152	-0.288619	-0.461699	0.015359	-0.173043	-0.11892	-0.662819	-0.585464	-0.495318	-0.381933	-0.44691	-0.479961
CNP	black	0.0105786	0.0751328	-0.0941115	0.254102	0.157126	0.687512	0.415374	0.941556	0.7199	-0.0484089	0.114311	0.564299	0.235555	-0.0790968	0.0681005	0.157956	-0.0335833	0.179459	0.341442	0.558684	-0.342638	0.233286	-0.0588629	-0.102634	0.354644	0.320639	0.141533	0.337209	0.307654	0.124619	-0.332416	-0.498335	0.112816	-0.164651	-0.0988233	-0.656498	-0.553956	-0.576031	-0.420859	-0.442089	-0.54281
FAM53A	black	-0.0371474	0.0817707	-0.24559	0.0406779	-0.0530668	0.59422	0.294053	0.728322	0.397031	0.0546803	0.0292504	0.362624	-0.0184768	-0.341574	-0.256123	-0.169102	-0.312161	0.18554	0.511363	0.593782	-0.00485557	0.43174	0.017214	-0.236584	0.151752	0.182175	0.0090639	0.293612	0.0561269	0.0648673	-0.153512	-0.265248	0.159636	0.101594	0.0236468	-0.375672	-0.274656	-0.428998	-0.268666	-0.318524	-0.474799
UGT8	black	-0.0560692	0.135574	0.0378546	0.365534	0.327864	0.634181	0.406567	0.84893	0.812278	-0.199937	-0.122804	0.324234	-0.0506065	-0.0915561	0.0841163	0.314271	0.0908825	0.0889147	0.194651	0.397457	-0.44538	0.0997242	-0.121175	-0.174751	0.184676	0.352023	0.0724616	0.274958	0.309633	-0.0601444	-0.135807	-0.341007	-0.0601165	-0.136461	-0.156963	-0.705114	-0.665221	-0.421362	-0.264436	-0.329164	-0.492435
ARHGAP1	black	-0.014697	0.198401	0.0024383	0.238236	0.208209	0.66935	0.468952	0.69944	0.598535	0.0603391	0.223857	0.576171	0.325965	0.038735	0.216963	0.22274	0.0497775	0.0849879	0.33649	0.579591	-0.303804	0.15878	-0.188155	-0.212656	0.0619916	0.139541	0.134739	0.250039	0.285969	0.0743302	-0.556646	-0.583956	-0.136229	-0.266765	-0.305394	-0.330848	-0.384424	-0.616498	-0.585472	-0.533119	-0.4115
TTLL11	black	-0.208611	0.275983	0.151727	0.325778	0.340988	0.593491	0.464764	0.757249	0.597856	0.209912	0.275573	0.576333	0.215278	-0.257142	0.130416	0.156622	-0.0913479	0.0150741	0.195381	0.364119	-0.397675	0.0652737	-0.190583	-0.216246	0.498639	0.181084	-0.121738	0.160695	0.142387	0.0723772	-0.194034	-0.22789	0.14948	0.131804	0.127141	-0.689731	-0.525763	-0.42552	-0.219571	-0.33455	-0.540049
PRIMA1	black	-0.105353	0.188089	-0.0476703	0.466374	0.318962	0.695217	0.562113	0.852003	0.68584	-0.00997562	0.0626467	0.364335	-0.0461962	-0.187207	0.0233197	0.226164	-0.137443	0.0689142	0.199857	0.513718	-0.461577	0.114789	-0.191987	-0.210906	0.108574	0.41123	-0.0288217	0.349371	0.360116	-0.270532	-0.362505	-0.485935	0.0151567	-0.137301	-0.375691	-0.451841	-0.65373	-0.366916	-0.407684	-0.185828	-0.186935
TPRN	black	0.0761137	0.0729118	-0.292941	0.270768	0.132291	0.769639	0.473461	0.798807	0.644435	-0.109314	-0.0528052	0.254814	-0.149783	-0.0825958	-0.115758	0.143807	-0.136334	0.202703	0.502483	0.71209	-0.232962	0.380655	0.087079	-0.143845	0.152085	0.246218	0.210427	0.472408	0.349909	-0.193386	-0.0902399	-0.321345	-0.0153021	-0.176298	-0.375443	-0.514555	-0.682205	-0.523585	-0.516779	-0.237229	-0.286657
PRR18	black	-0.0660308	0.0635778	-0.0332589	0.278442	0.164391	0.562763	0.340773	0.814578	0.675653	-0.0182293	0.146612	0.484148	0.224606	-0.0760439	0.151827	0.238542	0.0710336	0.205799	0.220152	0.405249	-0.408671	0.0566086	-0.208088	-0.174835	0.253154	0.458422	0.136551	0.204479	0.314049	-0.0344818	-0.362853	-0.476843	0.0707099	-0.205514	-0.219521	-0.469954	-0.418875	-0.33719	-0.31371	-0.343902	-0.340918
SLCO3A1	black	-0.119003	0.267364	-0.0360702	0.595344	0.479781	0.847339	0.70876	0.827835	0.803745	-0.145542	-0.0561266	0.312838	-0.107158	-0.178082	0.0440968	0.39897	-0.0393499	0.0480747	0.271719	0.631026	-0.553431	0.163463	-0.17333	-0.226906	0.164203	0.451522	0.0525354	0.456993	0.498312	-0.287991	-0.299537	-0.518104	-0.0953216	-0.254668	-0.443674	-0.657237	-0.8141	-0.514352	-0.494739	-0.227926	-0.363267
MYO1D	black	-0.0775089	0.185086	-0.0094747	0.275982	0.264419	0.704033	0.451256	0.886235	0.76213	-0.0843943	-0.0742397	0.301804	-0.098011	-0.178627	0.00239852	0.181092	-0.0552679	0.129912	0.285185	0.464306	-0.371601	0.147192	-0.111013	-0.266241	0.185724	0.25639	-0.0248353	0.249016	0.217005	-0.0778078	-0.0842772	-0.264532	0.166627	-0.0220202	-0.143559	-0.63442	-0.629526	-0.368207	-0.334211	-0.365623	-0.370502
BOK	black	-0.0946211	0.140127	-0.234677	0.157415	0.119334	0.710265	0.416501	0.798159	0.567355	-0.088686	-0.174714	0.123287	-0.340102	-0.284147	-0.273904	-0.015441	-0.23841	0.193489	0.491696	0.612767	-0.151679	0.375154	0.11406	-0.181733	0.273354	0.192616	0.0129582	0.339391	0.127997	-0.163559	0.134729	-0.124813	0.230265	0.0648998	-0.234495	-0.512334	-0.603283	-0.411579	-0.396615	-0.180119	-0.306937
NT5DC1	black	-0.0335053	-0.0195236	-0.0882564	0.554658	0.355748	0.609464	0.491527	0.772217	0.750526	-0.0727614	0.234704	0.678787	0.308798	-0.141432	0.261611	0.438689	0.100533	-0.156763	0.066033	0.447448	-0.519574	0.108437	-0.162514	0.0200553	0.424654	0.371948	0.267749	0.453342	0.567581	-0.051443	-0.35325	-0.477615	-0.0899952	-0.188619	-0.0763323	-0.731575	-0.634098	-0.58299	-0.380749	-0.454793	-0.603901
TMEM125	black	0.0242881	0.0307911	-0.189043	0.204118	0.0758142	0.645166	0.364221	0.921787	0.619321	-0.0301867	0.0490417	0.487786	0.100137	-0.164915	-0.0882889	0.0187214	-0.194537	0.147999	0.390133	0.574893	-0.20688	0.363763	0.0518215	-0.0953559	0.29176	0.278993	0.0812873	0.399401	0.243809	0.0218755	-0.241453	-0.411512	0.151799	-0.0410263	0.011493	-0.633236	-0.533262	-0.524353	-0.330891	-0.355101	-0.555794
TMEM151A	black	-0.106204	0.0656668	-0.327407	0.447362	0.235742	0.872888	0.609152	0.810261	0.699981	-0.302152	-0.223677	0.246931	-0.163402	-0.320052	-0.165899	0.280191	-0.107	0.0762988	0.511413	0.844296	-0.256051	0.490663	0.09681	-0.17095	0.171512	0.410064	0.202078	0.630209	0.54435	-0.1391	-0.230031	-0.525074	-0.0611648	-0.290055	-0.372965	-0.575157	-0.701078	-0.568866	-0.581692	-0.354362	-0.357626
S1PR5	black	-0.0283078	0.0427321	-0.278246	0.328767	0.117346	0.668307	0.488811	0.810263	0.511579	-0.0435553	-0.0237363	0.284303	-0.15815	-0.260216	-0.227745	-0.00245567	-0.355282	0.0711229	0.373171	0.625348	-0.144694	0.443059	0.164967	-0.190654	0.352341	0.255692	-0.0225466	0.513178	0.289043	-0.119775	-0.145292	-0.350798	0.210615	0.00288427	-0.103876	-0.511367	-0.604054	-0.411825	-0.393613	-0.168908	-0.266498
MAP6D1	black	0.107789	0.00878774	-0.224075	0.333142	0.198134	0.756815	0.457518	0.880957	0.786379	-0.179674	0.0138916	0.518712	0.135633	-0.0446168	0.0865331	0.313074	0.0646355	0.0745519	0.380617	0.660593	-0.343619	0.29853	0.0135322	-0.104252	0.279067	0.273472	0.3123	0.459783	0.461538	0.0243211	-0.298922	-0.486506	-0.0825945	-0.281428	-0.238504	-0.681976	-0.677452	-0.676813	-0.563762	-0.483103	-0.533294
CUEDC1	black	0.0884111	0.0728634	-0.249009	0.0707081	-0.0300427	0.605047	0.342043	0.747339	0.3949	0.0663133	0.0975934	0.428202	0.117411	-0.0916181	-0.160961	-0.139745	-0.335255	0.222221	0.520442	0.634579	-0.00400188	0.471249	0.144374	-0.18288	0.113148	0.0808964	0.0171792	0.403088	0.144445	0.138254	-0.295967	-0.380451	0.174235	0.0209372	0.0338173	-0.445042	-0.390141	-0.516844	-0.352596	-0.260958	-0.429295
GPR62	black	0.061622	0.0727248	-0.19566	0.269813	0.142947	0.714691	0.415111	0.919664	0.716417	-0.146134	-0.0771796	0.359054	-0.0418786	-0.0882723	-0.0898246	0.135766	-0.104483	0.208402	0.410345	0.606946	-0.277249	0.313681	0.00492568	-0.138926	0.196618	0.33433	0.145402	0.419185	0.328954	-0.0982772	-0.239742	-0.430903	0.0141803	-0.176712	-0.217306	-0.602453	-0.617333	-0.530377	-0.418304	-0.315321	-0.457827
AATK	black	-0.141902	0.457609	0.129223	0.395369	0.431898	0.822458	0.679353	0.868723	0.668312	0.271055	0.262687	0.497505	0.0424434	-0.194184	0.104384	0.143743	-0.233901	0.119759	0.351923	0.560945	-0.445613	0.0966133	-0.289416	-0.368237	0.0743071	0.15582	-0.219976	0.225872	0.162286	-0.153772	-0.323709	-0.382851	0.0983045	0.111283	-0.191293	-0.572899	-0.639266	-0.444088	-0.402334	-0.271891	-0.37707
AFMID	black	-0.1407	0.146059	-0.203109	0.379253	0.243491	0.829713	0.577318	0.843653	0.672778	-0.123255	-0.103876	0.319987	-0.139276	-0.325729	-0.110912	0.184949	-0.158104	0.064241	0.447192	0.739873	-0.283983	0.390756	-0.0170257	-0.289645	0.120519	0.359992	0.0442614	0.459011	0.35382	-0.143697	-0.249694	-0.462089	0.0298391	-0.162534	-0.297183	-0.551976	-0.65475	-0.517424	-0.481724	-0.349232	-0.388963
CNTN2	black	-0.172442	0.421066	0.177972	0.454296	0.474698	0.766278	0.637077	0.910073	0.752375	0.149704	0.125509	0.373446	-0.078626	-0.222181	0.0757778	0.201288	-0.170042	0.123131	0.217022	0.435252	-0.535253	0.00432283	-0.319281	-0.320581	0.159759	0.315875	-0.234244	0.18768	0.173864	-0.226582	-0.211448	-0.335694	0.0972048	0.0896231	-0.197566	-0.631279	-0.679262	-0.350655	-0.28487	-0.156571	-0.367849
GLDN	black	-0.0465867	0.00961471	0.0852239	0.520591	0.340197	0.449247	0.411529	0.745979	0.675055	0.0758989	0.3941	0.74508	0.508267	0.0344981	0.404271	0.39761	0.104714	-0.130513	-0.123238	0.244712	-0.625211	-0.0946965	-0.282549	0.0293202	0.331788	0.438356	0.147408	0.290651	0.481667	-0.0301409	-0.520087	-0.534023	-0.0125458	-0.218813	-0.0323737	-0.671714	-0.556186	-0.402834	-0.20408	-0.347051	-0.484217
SEMA4D	black	-0.0600827	0.169631	0.0166041	0.328137	0.279548	0.629909	0.468547	0.86079	0.674934	0.165608	0.246654	0.496707	0.0757696	-0.0438582	0.10152	0.129192	-0.150179	-0.0124052	0.123365	0.40391	-0.41717	0.131001	-0.0792056	-0.0984155	0.333406	0.207882	-0.0164814	0.312401	0.229759	-0.0592578	-0.191448	-0.297741	0.168469	0.0154946	-0.0986968	-0.674113	-0.620218	-0.452855	-0.307557	-0.290806	-0.460126
DNAH17	black	-0.0710976	0.110053	-0.0801811	0.405833	0.265769	0.699222	0.496347	0.914121	0.727394	-0.0892473	0.0180331	0.448771	0.0430316	-0.202054	0.0173592	0.208091	-0.0920436	0.0657279	0.235907	0.519715	-0.384974	0.187963	-0.137825	-0.180191	0.26849	0.413735	0.0304557	0.344921	0.332906	-0.025625	-0.320351	-0.500875	0.0434077	-0.141542	-0.160712	-0.597902	-0.573315	-0.477087	-0.364296	-0.323822	-0.472905
DMBT1	black	-0.0310858	0.0284369	-0.14115	0.357756	0.160083	0.542507	0.393667	0.7445	0.516826	-0.000663344	0.075849	0.393119	0.0363899	-0.309903	-0.0255273	0.110822	-0.190849	0.0020906	0.173592	0.432793	-0.306123	0.206849	-0.0802041	-0.146795	0.160544	0.39152	0.00103237	0.347552	0.298841	0.0462031	-0.20234	-0.363482	0.0490512	-0.0506733	-0.0825839	-0.549389	-0.514473	-0.314938	-0.191817	-0.248688	-0.34766
COL4A5	black	0.00218904	0.214905	0.281811	0.276482	0.341547	0.458845	0.304436	0.805591	0.716189	0.161214	0.34312	0.690438	0.38729	-0.0332566	0.356727	0.2715	0.151869	0.113934	0.0274183	0.139078	-0.5591	-0.190796	-0.416511	-0.1902	0.362443	0.288779	-0.00478675	-0.00972488	0.147903	0.103154	-0.292319	-0.333191	0.102851	0.081956	0.144366	-0.724737	-0.431049	-0.364068	-0.101736	-0.380737	-0.621536
ZDHHC9	black	-0.0321297	0.109669	0.0323124	0.279864	0.22937	0.645552	0.383296	0.918649	0.796434	-0.055186	0.126836	0.579796	0.271882	-0.0412562	0.203675	0.270266	0.102566	0.169605	0.266601	0.454438	-0.44396	0.0916318	-0.18947	-0.198361	0.240581	0.311237	0.133725	0.245537	0.307177	0.0610835	-0.33126	-0.451292	0.0508823	-0.134407	-0.113393	-0.648096	-0.571116	-0.49533	-0.373109	-0.464659	-0.50292
TMEM63A	black	-0.135933	0.426932	0.211923	0.487137	0.500002	0.730045	0.654918	0.889313	0.718821	0.282343	0.307395	0.551473	0.0690145	-0.110184	0.17765	0.18874	-0.198046	-0.00244461	0.111699	0.393703	-0.549498	-0.0338042	-0.39603	-0.335042	0.108421	0.244187	-0.237501	0.184986	0.171476	-0.194685	-0.414861	-0.431125	0.014454	0.0918467	-0.13108	-0.605518	-0.608019	-0.435895	-0.288801	-0.236509	-0.490246
MVB12B	black	-0.10106	0.292038	-0.117379	0.285067	0.278877	0.830155	0.579957	0.866201	0.649323	0.0509443	0.0938712	0.420986	-0.030267	-0.168622	-0.105928	0.0811412	-0.22762	0.210108	0.489878	0.673905	-0.30449	0.290961	-0.0679	-0.212449	0.323327	0.2479	-0.00180442	0.355106	0.22514	-0.113819	-0.277915	-0.446009	0.112116	-0.0346435	-0.206486	-0.605172	-0.607581	-0.629353	-0.48566	-0.278687	-0.531719
KIF13B	black	-0.164309	0.329053	0.155045	0.24617	0.248921	0.506465	0.410809	0.719828	0.461991	0.275707	0.269686	0.394251	0.0787675	-0.152828	-0.0355064	-0.0667868	-0.310912	0.174979	0.191593	0.280997	-0.28239	0.0639013	-0.192613	-0.264066	0.430332	0.168661	-0.288667	0.128273	0.0103064	-0.082725	-0.239012	-0.241002	0.273298	0.212486	0.0670984	-0.453502	-0.371086	-0.307069	-0.129725	-0.0472726	-0.380679
UVRAG	black	-0.115283	0.327036	0.240411	0.684381	0.621972	0.649593	0.713775	0.69445	0.719908	0.228485	0.402254	0.587655	0.246842	0.0791097	0.416634	0.434573	-0.0315513	-0.292761	-0.128931	0.337562	-0.698689	-0.110871	-0.349592	-0.189793	0.0940153	0.179883	-0.0708754	0.330385	0.44137	-0.275056	-0.429363	-0.446167	-0.161454	-0.108434	-0.311116	-0.641393	-0.736345	-0.414035	-0.321781	-0.250396	-0.373277
ZNF536	black	-0.119615	0.261618	0.202378	0.270577	0.333537	0.574657	0.39435	0.87648	0.736591	0.211783	0.35767	0.682861	0.323944	-0.00707789	0.259777	0.172447	-0.0123843	0.0817154	0.113581	0.282044	-0.50983	-0.0492331	-0.302498	-0.199157	0.31516	0.187809	-0.0536939	0.117041	0.142044	0.047879	-0.331644	-0.350934	0.11977	0.135753	0.0451545	-0.700796	-0.522522	-0.46012	-0.219379	-0.350574	-0.601117
GJC2	black	-0.049878	0.245401	-0.19325	0.29972	0.205905	0.83924	0.592202	0.869966	0.592626	-0.0113606	-0.0973347	0.205132	-0.275395	-0.300181	-0.25758	-0.0158462	-0.384241	0.169499	0.534919	0.735809	-0.162639	0.448588	0.0659892	-0.28999	0.112287	0.184644	-0.114196	0.459602	0.201279	-0.172842	-0.113012	-0.314743	0.11083	0.0339395	-0.21156	-0.510535	-0.650693	-0.473369	-0.444536	-0.20969	-0.318132
TMEM235	black	-0.14981	0.24353	0.0325512	0.239781	0.217652	0.592383	0.437946	0.832471	0.523579	0.266329	0.299208	0.554783	0.125651	-0.240857	0.0161123	-0.0214038	-0.258234	0.12262	0.268995	0.424078	-0.277964	0.177719	-0.165597	-0.334342	0.264486	0.190995	-0.142206	0.222457	0.0793499	0.00629257	-0.243314	-0.32371	0.23873	0.185578	0.0326268	-0.53919	-0.435755	-0.434918	-0.244929	-0.234876	-0.518277
SMIM5	black	-0.00539087	0.0355757	-0.244922	0.336227	0.171242	0.678651	0.466391	0.850563	0.600068	-0.06219	-0.00945492	0.388705	-0.060344	-0.222423	-0.105857	0.115404	-0.201324	-0.0152947	0.321548	0.612427	-0.232846	0.362283	0.0742086	-0.13674	0.252364	0.262955	0.0932455	0.460395	0.328705	-0.108013	-0.159149	-0.362611	0.0616283	-0.0746992	-0.180066	-0.574745	-0.636832	-0.501809	-0.435468	-0.284016	-0.388724
MOG	black	-0.0419443	0.14729	0.0126407	0.397103	0.291232	0.648511	0.472357	0.944291	0.73915	-0.00252928	0.118126	0.528248	0.117516	-0.115988	0.0916931	0.204916	-0.0894532	0.0946438	0.188531	0.441528	-0.437872	0.129123	-0.158306	-0.261509	0.252755	0.383994	-0.0117924	0.322714	0.315531	-0.0606847	-0.3807	-0.514581	0.0759689	-0.0797315	-0.0868472	-0.65093	-0.614708	-0.438734	-0.305207	-0.311659	-0.452064
SLC48A1	black	-0.00667864	0.0270343	-0.382227	0.0980215	-0.0716545	0.726712	0.388928	0.742126	0.464832	-0.209829	-0.135565	0.286118	0.0108087	-0.291886	-0.277014	-0.0190297	-0.198919	0.348902	0.676729	0.811108	0.000782596	0.548154	0.117679	-0.170934	0.116365	0.326958	0.175277	0.467661	0.300726	0.0602407	-0.346801	-0.552268	0.109602	-0.251786	-0.220236	-0.316648	-0.333213	-0.536621	-0.554439	-0.422775	-0.351422
TRIM59	black	0.0291004	0.128388	0.158953	0.252988	0.262017	0.515728	0.289057	0.858128	0.761469	0.0220469	0.174631	0.613089	0.304033	-0.0430723	0.276543	0.250086	0.136576	0.0855233	0.115532	0.263393	-0.474532	-0.0329911	-0.289836	-0.173056	0.223034	0.259204	0.0608658	0.11375	0.201574	0.100723	-0.257935	-0.347157	0.0304089	-0.00652345	0.0411428	-0.723362	-0.496836	-0.443094	-0.209586	-0.447197	-0.62408
PRCD	black	-0.107871	0.05281	-0.179089	0.491471	0.29572	0.6782	0.536041	0.744776	0.68121	-0.0287099	0.064689	0.359056	-0.0647979	-0.0644378	0.0851177	0.305006	-0.0680995	-0.170571	0.183162	0.574016	-0.338413	0.268431	0.0375351	-0.221259	0.12094	0.207418	0.133067	0.478978	0.429188	-0.245635	-0.252192	-0.355897	-0.152771	-0.167086	-0.376761	-0.450604	-0.700536	-0.482789	-0.468294	-0.267268	-0.282846
HOXD-AS1	black	-0.0373444	0.0684144	-0.113283	0.276975	0.18384	0.610639	0.364769	0.851745	0.661804	-0.111551	-0.0125995	0.445186	0.0696106	-0.218268	-0.0523454	0.15039	-0.0693918	0.143455	0.305433	0.477408	-0.295777	0.23805	-0.0420979	-0.139216	0.427662	0.341776	0.0707015	0.33066	0.283012	0.000502677	-0.241181	-0.372641	0.128412	-0.0663425	0.0137162	-0.671344	-0.543919	-0.521089	-0.297881	-0.320851	-0.572799
RP11-267C16.1	black	-0.00864205	-0.0617391	-0.102505	0.201473	0.0907644	0.495573	0.245418	0.808048	0.66844	-0.0467991	0.124403	0.488106	0.175466	-0.019974	0.101495	0.153685	0.0112369	0.0275925	0.169508	0.372896	-0.332975	0.203441	0.0626731	-0.0317723	0.455209	0.210238	0.160194	0.327692	0.285303	0.03126	-0.124808	-0.249795	0.251543	-0.0340746	0.0144547	-0.688829	-0.587746	-0.436762	-0.261036	-0.371814	-0.483327
HPN-AS1	black	-0.108509	0.0515418	-0.290322	0.469171	0.229719	0.719716	0.594666	0.728738	0.572491	-0.143711	-0.136245	0.131844	-0.292942	-0.184888	-0.14292	0.197751	-0.234486	-0.0746714	0.308944	0.693843	-0.224963	0.4218	0.160869	-0.264182	0.0648872	0.274204	0.0545969	0.598481	0.450449	-0.352644	-0.18209	-0.396839	-0.0100733	-0.201176	-0.496391	-0.34659	-0.709526	-0.375397	-0.532089	-0.151621	-0.038081
AC018647.3	black	0.0635283	-0.041926	-0.110619	0.2188	0.13252	0.497014	0.257205	0.805043	0.670049	-0.048328	0.200996	0.62688	0.320269	0.0373352	0.120752	0.180427	0.0471232	0.0718559	0.163353	0.36123	-0.357955	0.157039	-0.0350127	0.0556856	0.474797	0.270865	0.285122	0.344558	0.339114	0.0812705	-0.231738	-0.386436	0.0760002	-0.104337	0.0785108	-0.748271	-0.496293	-0.597742	-0.277989	-0.421079	-0.719532
RP11-436F9.1	black	0.0841313	-0.0737817	-0.215169	0.279951	0.122138	0.529827	0.293336	0.718179	0.623746	-0.189337	0.0595263	0.495422	0.214778	-0.0167649	0.0471058	0.244052	0.0747827	0.12367	0.256621	0.462775	-0.274105	0.217007	-0.0434865	-0.0886317	0.425878	0.392556	0.32557	0.383962	0.428911	-0.00396089	-0.375012	-0.515472	-0.0566092	-0.297064	-0.12256	-0.498037	-0.389424	-0.59811	-0.428649	-0.374477	-0.550994
FAHD2CP	black	0.0897871	-0.119707	-0.363886	0.159057	-0.0550703	0.525185	0.285974	0.691657	0.44259	0.0446103	0.258384	0.576714	0.295648	0.0401718	-0.0111279	0.0467157	-0.125864	0.0318387	0.314648	0.590804	-0.135901	0.358482	0.0412112	0.0286332	0.23991	0.209972	0.32948	0.444776	0.359637	-0.100511	-0.464834	-0.497163	0.0700125	-0.227812	-0.187959	-0.348947	-0.336594	-0.620018	-0.467871	-0.410168	-0.497563
LINC00940	black	-0.116715	0.231352	0.0264226	0.363686	0.313467	0.613197	0.447795	0.745414	0.62466	0.0134511	0.106497	0.439003	0.0713422	-0.292868	0.0454599	0.20292	-0.072207	0.156549	0.241719	0.411504	-0.38981	0.0995744	-0.263514	-0.260543	0.207165	0.394882	-0.0195888	0.226472	0.235962	-0.0459818	-0.279792	-0.438879	0.00749375	-0.0095442	-0.0700907	-0.584902	-0.447349	-0.440811	-0.2533	-0.250121	-0.587986
AC007163.3	black	-0.0298957	0.128852	0.0137529	0.137512	0.180299	0.528269	0.26478	0.731373	0.624866	-0.192352	-0.125104	0.283818	-0.0372926	-0.0962032	-0.0160254	0.16366	0.0600909	0.273947	0.320364	0.368797	-0.273818	0.140995	-0.0709529	-0.237013	0.302866	0.301761	0.0650787	0.17126	0.165181	-0.0109141	-0.129092	-0.347938	0.0943302	-0.0975547	-0.0718606	-0.562979	-0.458863	-0.404251	-0.296898	-0.31098	-0.435561
PRKCQ-AS1	black	0.058336	-0.0576643	-0.107715	0.300369	0.13079	0.532148	0.303804	0.85101	0.688404	-0.112989	0.15493	0.659047	0.395607	-0.0718236	0.13219	0.232866	0.0609658	0.114937	0.227649	0.42718	-0.331588	0.199377	-0.0402675	-0.0482931	0.492904	0.354652	0.225798	0.379091	0.412667	0.190974	-0.36935	-0.508727	0.0334015	-0.186237	0.122107	-0.714118	-0.481316	-0.530775	-0.288816	-0.501449	-0.637605
AC093590.1	black	0.0786496	-0.0591777	-0.0955129	0.106906	0.0237691	0.390531	0.166987	0.72027	0.489994	0.0734958	0.242631	0.623228	0.31356	-0.0823268	0.0782333	0.0280868	-0.0813261	0.0392369	0.149877	0.315523	-0.183244	0.202527	-0.0494591	-0.0237085	0.296213	0.150511	0.141717	0.27421	0.201417	0.148627	-0.294286	-0.318337	0.136893	-0.0243386	0.123449	-0.555486	-0.32064	-0.519331	-0.242106	-0.421037	-0.588665
DBNDD2	black	0.0085978	-0.0659651	-0.326317	0.310464	0.100573	0.728705	0.425148	0.912557	0.71974	-0.258711	-0.132717	0.335995	-0.0554093	-0.149894	-0.126573	0.186028	-0.0849871	0.149923	0.444036	0.695292	-0.216971	0.460535	0.187782	-0.163531	0.38625	0.369	0.243221	0.57019	0.451935	-0.0719268	-0.151611	-0.429909	0.0975557	-0.228654	-0.200442	-0.640065	-0.673154	-0.536596	-0.457502	-0.348085	-0.417366
HS3ST5	black	0.0138711	0.0248141	-0.107047	0.116465	0.0381677	0.471418	0.231548	0.718266	0.515302	-0.0226727	0.0664216	0.397491	0.107571	-0.187637	-0.069373	-0.0118059	-0.150735	0.150472	0.323345	0.398244	-0.131514	0.27502	0.00285593	-0.169895	0.243175	0.0642266	0.0400272	0.308647	0.163861	0.0348988	-0.0911704	-0.165468	0.165703	0.144006	0.110555	-0.499754	-0.427089	-0.378136	-0.252508	-0.369048	-0.396596
RP11-81H3.2	black	0.0409182	0.0328736	-0.0284511	0.384107	0.240222	0.490699	0.39316	0.757831	0.591418	0.134367	0.368963	0.698063	0.346647	0.0031566	0.243538	0.229917	-0.0357717	-0.0883923	0.0228927	0.339414	-0.428105	0.0557189	-0.210622	-0.114565	0.272943	0.236906	0.129858	0.326981	0.371627	-0.0107911	-0.445778	-0.452757	0.0282447	-0.0940395	-0.0302142	-0.581882	-0.476683	-0.517306	-0.319408	-0.396066	-0.525675
RP11-946L20.2	black	-0.0515779	-0.0755588	-0.0670755	0.129885	0.0363049	0.401322	0.145729	0.727114	0.590811	-0.106425	0.0751756	0.509608	0.278136	-0.0968647	0.0933909	0.151658	0.115592	0.153053	0.214762	0.318659	-0.274996	0.144691	-0.014107	-0.0800098	0.476218	0.288702	0.197785	0.191763	0.221514	0.205777	-0.213587	-0.280215	0.204174	-0.0771779	0.0564698	-0.585318	-0.433066	-0.477351	-0.286396	-0.348749	-0.513025
LINC00639	black	-0.0186676	0.284303	0.28206	0.0332272	0.170937	0.377129	0.200204	0.731328	0.512793	0.25955	0.310713	0.614571	0.37301	-0.0659003	0.175619	-0.0387284	-0.055054	0.26507	0.156623	0.11413	-0.325528	-0.102691	-0.320591	-0.215983	0.277917	0.112206	-0.20743	-0.117283	-0.128614	0.290159	-0.323921	-0.247791	0.252574	0.223885	0.296955	-0.575224	-0.252542	-0.368728	-0.077225	-0.324084	-0.618402
SMIM6	black	0.0769485	-0.21444	-0.356503	0.318918	0.0467527	0.568152	0.298408	0.803538	0.673641	-0.218616	-0.00321888	0.477101	0.186092	-0.0563775	0.0364625	0.274022	0.0574035	-0.0378232	0.259992	0.570936	-0.253969	0.345908	0.115872	0.0664382	0.302533	0.338192	0.408714	0.53036	0.536635	-0.036961	-0.240313	-0.413085	-0.0312693	-0.30552	-0.166397	-0.596497	-0.55923	-0.568196	-0.430371	-0.455867	-0.507257
RP11-496D24.2	black	-0.000275244	0.141444	-0.0844248	0.173307	0.170152	0.560416	0.348369	0.753213	0.506518	0.126503	0.191164	0.510961	0.0533688	-0.188371	-0.0418148	-0.0101496	-0.245396	0.0769258	0.285046	0.42025	-0.245046	0.231314	-0.0615768	-0.115036	0.243587	0.113726	-0.0111294	0.282322	0.121778	-0.041966	-0.104425	-0.226441	0.161708	0.158778	0.113065	-0.659846	-0.496947	-0.494351	-0.26237	-0.304525	-0.569717
RP11-353N14.4	black	0.0153722	0.103933	-0.108974	0.209749	0.110577	0.585066	0.36892	0.822703	0.542305	0.10331	0.212757	0.555093	0.159013	-0.162584	-0.01051	0.0247397	-0.212804	0.137163	0.282356	0.467042	-0.254401	0.195486	-0.135165	-0.191801	0.195036	0.235455	0.0251094	0.291211	0.214254	-0.0194905	-0.324473	-0.411082	0.130155	-0.0221749	-0.071173	-0.51161	-0.438193	-0.448022	-0.321361	-0.34399	-0.428556
RP11-1055B8.3	black	0.096355	0.255342	0.118451	0.102519	0.156098	0.446452	0.299853	0.703624	0.431863	0.313556	0.427593	0.678426	0.382132	0.00385458	0.164098	-0.0296349	-0.14642	0.217994	0.219295	0.298705	-0.299201	0.0284392	-0.252205	-0.169146	0.0917758	0.0884094	-0.0473821	0.0820366	0.0297983	0.120715	-0.469715	-0.414597	0.116572	0.134884	0.0647373	-0.45742	-0.290069	-0.448055	-0.247861	-0.255801	-0.486343
RP11-353N14.5	black	-0.0138386	0.16774	-0.101517	-0.0231523	0.00892224	0.541924	0.247456	0.719592	0.431916	0.137273	0.0965538	0.350646	-0.0115712	-0.196859	-0.0931764	-0.0988452	-0.189945	0.263146	0.428576	0.442086	-0.1322	0.199522	-0.0401744	-0.244964	0.156779	0.128521	-0.0514158	0.0723547	-0.0577606	0.0618771	-0.122034	-0.181602	0.244314	0.0851865	-0.0791896	-0.386295	-0.362853	-0.39211	-0.309002	-0.273417	-0.358908
FLJ30594	black	-0.136223	0.155883	-0.00854187	0.229926	0.214879	0.580833	0.368627	0.824365	0.647994	0.0212535	0.105182	0.404764	0.0120493	-0.13191	0.00509156	0.0994463	-0.108339	0.146239	0.215704	0.36572	-0.353441	0.113888	-0.105619	-0.168538	0.315903	0.252511	-0.0196099	0.234631	0.183783	-0.046567	-0.145011	-0.282461	0.281848	0.0771596	-0.0715079	-0.620506	-0.537835	-0.363928	-0.238285	-0.234898	-0.430625
BAD	blue	0.297128	-0.426795	-0.713999	-0.3114	-0.543604	0.169211	-0.170644	0.110469	-0.116412	-0.519117	-0.590864	-0.273894	-0.271744	-0.176635	-0.586275	-0.259111	-0.161357	0.309969	0.71647	0.609763	0.633454	0.82989	0.683614	0.0281832	-0.0170943	0.0953385	0.40094	0.478031	0.151648	0.172347	0.139156	-0.119269	-0.0396687	-0.334496	-0.0259327	0.0981161	0.0650503	-0.239908	-0.274991	-0.208493	-0.0331218
POLR2J	blue	0.196705	-0.480661	-0.755898	-0.378568	-0.663594	-0.0179937	-0.261625	-0.0990647	-0.340606	-0.439607	-0.50091	-0.371715	-0.283212	-0.0922547	-0.672465	-0.402953	-0.27245	0.242547	0.533565	0.489438	0.718128	0.825736	0.744394	0.185353	-0.0786468	0.0151511	0.391488	0.511696	0.125587	0.138727	0.0948535	-0.0873408	0.0633323	-0.293485	-0.108007	0.330407	0.246085	-0.127148	-0.243196	-0.0430685	0.156169
C19orf60	blue	0.0986991	-0.155163	-0.515665	-0.153663	-0.352733	0.240477	0.0749432	0.22857	-0.169366	0.0107333	-0.132304	-0.0617043	-0.255669	-0.164852	-0.539743	-0.444032	-0.57645	0.0843321	0.528273	0.558423	0.529217	0.776594	0.587514	-0.0972872	0.0116869	-0.156841	0.00102716	0.516587	0.0284461	-0.0373338	0.0430288	-0.089179	0.175446	0.0677272	0.0794407	0.0362658	-0.0674479	-0.245606	-0.267661	-0.08496	-0.029243
CCDC124	blue	0.0505099	-0.133347	-0.66475	-0.0995563	-0.308905	0.457365	0.191406	0.254962	-0.0316805	-0.342494	-0.53966	-0.358888	-0.585242	-0.34708	-0.728427	-0.305106	-0.484685	0.264021	0.766592	0.788553	0.494033	0.896464	0.646956	-0.113832	-0.0400821	0.061499	0.121555	0.649767	0.183114	-0.161356	0.192306	-0.079771	0.167889	-0.132786	-0.205253	-0.000313937	-0.214911	-0.209799	-0.354433	-0.0250665	0.0892271
TRAPPC6A	blue	0.195652	-0.477478	-0.67462	-0.344809	-0.616055	0.0678433	-0.219658	0.165673	-0.153011	-0.316407	-0.274537	-0.00405039	1.36e-05	-0.0568797	-0.501347	-0.381151	-0.259228	0.163201	0.493259	0.496723	0.564239	0.766453	0.635628	0.151196	0.0480201	-0.0137393	0.368492	0.47318	0.113683	0.207236	-0.0546556	-0.197916	0.180037	-0.173451	0.0876509	0.0876472	0.102609	-0.233801	-0.171808	-0.257387	-0.111489
TSR3	blue	0.270313	-0.184027	-0.587419	-0.228041	-0.404202	0.284854	0.01803	0.232778	-0.107712	-0.252165	-0.392307	-0.197684	-0.289665	-0.0977931	-0.595073	-0.354783	-0.424258	0.337351	0.724769	0.645115	0.561832	0.817204	0.64051	-0.0729596	-0.0212128	-0.0129915	0.153726	0.518361	0.0957596	-0.0400527	0.0170376	-0.161517	0.0697697	-0.173878	-0.00520821	0.0423967	-0.051507	-0.249409	-0.282902	-0.051021	-0.0195792
RTFDC1	blue	-0.0344306	-0.0925604	-0.451654	0.18969	-0.060777	0.461339	0.344894	0.373873	0.156672	-0.324849	-0.354449	-0.0862796	-0.269311	-0.197648	-0.465819	-0.073444	-0.336542	0.104406	0.462342	0.683733	0.229515	0.709872	0.488056	-0.0472103	0.160714	0.19774	0.115433	0.689118	0.355011	-0.131814	-0.135757	-0.395548	-0.0156887	-0.251136	-0.16002	-0.124452	-0.292066	-0.311076	-0.344137	-0.10262	-0.0691266
USE1	blue	0.156406	-0.313801	-0.698758	-0.260001	-0.496299	0.222918	-0.0428068	0.169827	-0.172185	-0.315486	-0.469295	-0.279356	-0.442867	-0.307436	-0.729013	-0.447445	-0.480714	0.155044	0.617426	0.607044	0.615213	0.903624	0.758623	0.0505046	0.097395	-0.0278343	0.171003	0.586169	0.0745087	0.0889305	0.250224	0.0133738	0.265429	-0.0439565	0.0593616	0.00735491	-0.0538256	-0.220911	-0.240116	-0.0681919	-0.0217721
MRPL43	blue	0.310562	-0.477074	-0.793354	-0.0344347	-0.391167	0.304214	0.0228512	0.225615	0.0731975	-0.382045	-0.313828	-0.0768319	-0.217694	0.0457481	-0.40758	-0.069992	-0.170358	0.00909555	0.491905	0.679662	0.384092	0.797104	0.655483	0.224299	-0.0047649	0.0625878	0.572119	0.738625	0.454205	-0.0883929	0.0117615	-0.183592	-0.119342	-0.440061	-0.244818	-0.0848449	-0.222317	-0.424224	-0.425562	-0.28396	-0.130746
ISOC2	blue	0.152034	-0.263635	-0.658884	-0.209447	-0.437469	0.24455	0.0256839	0.0828555	-0.206398	-0.239366	-0.359518	-0.232406	-0.32876	-0.138515	-0.587482	-0.355372	-0.422239	0.089284	0.590773	0.655003	0.61352	0.848089	0.618828	-0.00659068	-0.244582	-0.105931	0.207333	0.575438	0.132986	0.0525501	0.0180614	-0.159533	-0.039367	-0.169187	-0.100342	0.179338	0.0240857	-0.232676	-0.337428	-0.131933	0.0652513
RFXANK	blue	0.255085	-0.381959	-0.759437	-0.399765	-0.662958	-0.00470977	-0.197892	-0.126602	-0.477761	-0.250268	-0.384268	-0.39803	-0.376843	-0.14771	-0.767118	-0.572645	-0.495013	0.214177	0.552393	0.478808	0.786691	0.794752	0.645516	0.187195	-0.107367	-0.101086	0.223951	0.437238	-0.0242433	0.0093177	0.152984	-0.0106889	0.132595	-0.101785	-0.0446338	0.427809	0.326347	-0.101622	-0.224831	0.0892724	0.173238
HMG20B	blue	0.333792	-0.274529	-0.698915	-0.309384	-0.532657	0.157546	-0.0678022	0.0816192	-0.268486	-0.189813	-0.413615	-0.407333	-0.502455	-0.0941832	-0.69653	-0.509402	-0.525822	0.186602	0.574165	0.526042	0.586897	0.733335	0.636911	0.0768862	-0.159407	-0.127469	0.115727	0.413005	-0.0384702	-0.192604	0.255392	0.0850823	0.191555	-0.0131152	-0.13306	0.248646	-0.0206571	-0.0533958	-0.213642	0.119285	0.271991
NTHL1	blue	0.109779	-0.167938	-0.587857	-0.0381141	-0.21889	0.518508	0.239279	0.460521	0.188088	-0.1979	-0.253655	0.0260293	-0.265428	-0.230652	-0.460066	-0.197153	-0.37308	0.0740765	0.621574	0.754246	0.274542	0.779568	0.546572	0.0563828	0.121858	-0.0677834	0.216919	0.631624	0.226244	-0.0564974	0.147076	-0.0504307	0.227412	0.00346831	-0.0359204	-0.334894	-0.424132	-0.401434	-0.382503	-0.213609	-0.201053
NDUFB4	blue	0.135077	-0.370061	-0.659484	-0.209335	-0.501344	0.0255191	-0.11867	-0.049031	-0.334303	-0.283041	-0.407568	-0.392994	-0.430157	-0.192841	-0.689577	-0.425025	-0.500538	0.134468	0.445602	0.4381	0.640821	0.824131	0.680501	0.10177	-0.114441	-0.0235559	0.156969	0.629252	0.162803	-0.14039	0.171525	0.024683	0.211163	-0.0672323	0.0781145	0.203893	0.138785	0.0364065	-0.0642252	0.0484967	0.187435
ZNRD1	blue	0.222418	-0.366473	-0.645646	-0.126449	-0.401013	0.188205	-0.00221889	0.0923193	-0.0869606	-0.481116	-0.547366	-0.33694	-0.357497	-0.101853	-0.528291	-0.16873	-0.218614	0.103165	0.473452	0.578698	0.492881	0.754261	0.664312	0.105703	-0.12341	-0.0245956	0.300291	0.604331	0.293676	-0.0443358	0.0625939	-0.131401	0.0954966	-0.319422	-0.263617	0.148322	-0.100614	-0.114636	-0.373627	-0.156932	0.274188
FAM3A	blue	0.0530608	-0.129275	-0.633304	-0.022538	-0.250936	0.578299	0.293588	0.440276	0.119271	-0.225256	-0.287562	-0.0031786	-0.280788	-0.362984	-0.510574	-0.211939	-0.364658	0.187318	0.69537	0.834505	0.291279	0.747583	0.419822	-0.0460957	0.0754292	0.155782	0.177584	0.533365	0.202762	0.045343	-0.0863857	-0.306858	0.180662	-0.203408	-0.27849	-0.07952	-0.252583	-0.492894	-0.56759	-0.265868	-0.152804
HSD17B10	blue	0.0702379	-0.286909	-0.605203	-0.0701682	-0.410555	0.106189	0.0435572	0.0182785	-0.275303	-0.247968	-0.280952	-0.164729	-0.152711	-0.176469	-0.560283	-0.339878	-0.4178	0.0500422	0.356244	0.515378	0.509818	0.713401	0.535162	0.196848	-0.111568	0.0655077	0.155514	0.584185	0.221704	0.0555446	-0.215316	-0.349711	0.0116854	-0.217048	-0.0951023	0.313446	0.138168	-0.165539	-0.252357	-0.0361454	0.108353
MRPS34	blue	0.19112	-0.0625299	-0.557089	-0.101516	-0.252158	0.441157	0.230239	0.255693	-0.0244965	-0.128353	-0.295078	-0.198972	-0.447843	-0.0485428	-0.560265	-0.334931	-0.514807	0.12937	0.646255	0.73169	0.466491	0.833788	0.622657	-0.0880752	-0.11964	-0.210512	0.0875391	0.631594	0.127705	-0.192189	0.0476504	-0.110979	0.0619829	-0.0876461	-0.226316	0.0303404	-0.227733	-0.376448	-0.464912	-0.122614	0.0167638
MRPL28	blue	0.0402528	-0.210104	-0.638743	0.116722	-0.223743	0.481213	0.272786	0.410767	0.0984096	-0.324788	-0.268841	0.0427145	-0.148392	-0.352517	-0.517877	-0.138358	-0.372911	0.179202	0.587862	0.78407	0.29936	0.793031	0.420586	-0.0297216	0.0601884	0.316833	0.267415	0.7399	0.429021	0.0208636	-0.240462	-0.519685	0.0130562	-0.304851	-0.174472	-0.0936655	-0.159008	-0.43931	-0.442849	-0.185579	-0.204477
NDUFB2	blue	-0.00217743	-0.162888	-0.488359	-0.0305131	-0.260373	0.247148	0.123985	0.25033	-0.0804608	-0.140929	-0.332434	-0.232784	-0.458175	-0.280985	-0.613653	-0.403126	-0.602199	-0.0106463	0.40848	0.509027	0.459894	0.810042	0.669691	0.00915807	0.00867	-0.114134	-0.0592322	0.648978	0.092445	-0.0698996	0.258388	0.050649	0.195925	0.174026	0.132167	-0.1091	-0.215877	-0.0866685	-0.0415571	0.0698026	0.00102912
GNPTG	blue	0.223016	-0.298405	-0.720145	-0.087516	-0.394554	0.445343	0.154205	0.38208	0.0573925	-0.243799	-0.216192	0.0244192	-0.16921	-0.130042	-0.52542	-0.259233	-0.35453	0.134084	0.607181	0.785242	0.357078	0.813009	0.531149	0.139111	0.128801	0.116256	0.371273	0.651241	0.288237	-0.0473078	-0.0879777	-0.298224	0.147396	-0.26388	-0.199427	-0.0690763	-0.166054	-0.432507	-0.461241	-0.230231	-0.163749
NAT14	blue	0.219918	-0.36062	-0.714394	-0.358386	-0.572121	0.143832	-0.140449	0.073859	-0.218666	-0.312479	-0.500451	-0.336432	-0.405528	-0.261391	-0.68662	-0.412419	-0.341499	0.14332	0.614799	0.552196	0.673419	0.790233	0.702446	0.0861365	0.0583416	-0.13985	0.257573	0.389421	-0.0226548	0.0767279	0.32672	0.17434	0.147987	-0.0515916	-0.0191205	0.168515	0.0310241	-0.183858	-0.320121	-0.0733942	0.103531
NUBP2	blue	0.246723	-0.290178	-0.672041	-0.260992	-0.446987	0.371087	0.0103569	0.289137	0.0372467	-0.387113	-0.414362	-0.0795122	-0.192249	-0.179354	-0.510701	-0.244913	-0.216551	0.284778	0.725994	0.736351	0.456382	0.824624	0.587938	0.0916026	-0.0119132	0.0248233	0.389187	0.549167	0.20314	0.105928	0.0195103	-0.224623	0.16175	-0.271243	-0.150522	-0.055493	-0.0893831	-0.421676	-0.462299	-0.346999	-0.171265
TMED1	blue	0.321973	-0.430975	-0.7138	-0.371693	-0.634115	0.0735478	-0.20223	0.0562549	-0.225997	-0.386206	-0.477594	-0.280025	-0.250793	-0.0484502	-0.615311	-0.412968	-0.287013	0.168554	0.517017	0.517517	0.634487	0.758386	0.656841	0.200195	-0.200005	-0.0766429	0.324691	0.437084	0.0619838	0.130713	0.0217016	-0.0865585	0.0554465	-0.234972	-0.122288	0.268725	0.097777	-0.148215	-0.232534	-0.112899	0.12847
ATP5D	blue	0.149238	-0.396414	-0.805444	-0.165742	-0.514231	0.284096	0.0240441	0.189383	-0.155358	-0.337412	-0.419869	-0.219067	-0.366502	-0.324414	-0.685988	-0.356637	-0.448003	0.115332	0.644849	0.728683	0.604482	0.934547	0.696064	-0.00260411	-0.0106537	0.0354045	0.277225	0.66437	0.222269	0.014379	0.123253	-0.121634	0.178675	-0.150042	-0.101659	0.0949232	-0.0512174	-0.20891	-0.356508	-0.15131	0.0837168
2019-03-02	blue	0.172027	-0.239895	-0.586598	-0.331658	-0.489855	0.242202	-0.0588854	0.212482	-0.14435	-0.158859	-0.266238	-0.113678	-0.206511	-0.356419	-0.579775	-0.436947	-0.384217	0.308823	0.698032	0.565583	0.522686	0.709307	0.54407	0.116702	0.172368	-0.0194536	0.140957	0.322627	-0.0632752	0.117251	0.242519	0.0677917	0.340862	0.0267324	0.0894334	0.00455498	0.0220258	-0.209259	-0.244813	-0.150658	-0.0724145
NDUFB7	blue	0.301224	-0.367518	-0.732622	-0.334317	-0.582188	0.150263	-0.10107	0.139984	-0.25299	-0.234908	-0.349327	-0.201564	-0.283105	-0.088516	-0.674305	-0.525525	-0.510176	0.173119	0.608331	0.593873	0.680996	0.915862	0.782661	0.143954	-0.0718498	-0.167291	0.233287	0.60314	0.0634664	0.117262	0.171208	-0.0272156	0.207262	-0.014952	0.0934761	0.0655658	0.0341598	-0.202773	-0.203384	-0.0556891	-0.0117208
TIMM13	blue	0.182707	-0.276998	-0.695736	-0.153159	-0.407967	0.390984	0.0702625	0.337824	0.0183072	-0.359829	-0.399139	-0.0752932	-0.236389	-0.25452	-0.615615	-0.297062	-0.361047	0.288997	0.72587	0.754697	0.453432	0.859533	0.571126	0.0644081	0.0595982	0.166351	0.27998	0.613943	0.220231	0.0759132	-0.0526368	-0.289898	0.076471	-0.22372	-0.0468763	-0.103212	-0.131334	-0.395351	-0.367557	-0.200953	-0.193617
CDC34	blue	0.241788	-0.31742	-0.759246	-0.162551	-0.427995	0.383016	0.0856788	0.19471	-0.0448976	-0.391097	-0.431643	-0.21188	-0.318515	-0.190306	-0.562702	-0.197569	-0.264865	0.207312	0.691459	0.775793	0.479449	0.819898	0.621347	0.0565617	-0.00339346	0.0685411	0.417631	0.588974	0.270708	-0.013498	0.0864744	-0.189296	0.0490314	-0.347749	-0.30844	0.0739571	-0.109084	-0.317	-0.524111	-0.171208	0.0845192
SLC25A1	blue	0.142517	-0.298758	-0.748959	-0.09791	-0.430676	0.167371	0.073808	-0.118616	-0.352228	-0.297233	-0.452762	-0.489205	-0.521955	-0.187099	-0.68361	-0.331677	-0.446062	0.00448434	0.460306	0.598182	0.594012	0.741239	0.637647	0.165812	-0.200524	-0.0195899	0.208844	0.53096	0.161905	-0.165282	0.0993931	-0.0926779	-0.0275547	-0.257761	-0.405853	0.465003	0.0468207	-0.101672	-0.394018	0.122825	0.395386
TOMM22	blue	-0.144173	-0.0783782	-0.484067	0.239562	-0.0366745	0.479887	0.334345	0.360048	0.192622	-0.364649	-0.383639	-0.123661	-0.36094	-0.45613	-0.492713	-0.018133	-0.340251	0.188952	0.50522	0.668643	0.15529	0.706195	0.439593	-0.102559	0.115374	0.32373	0.129193	0.750349	0.456234	-0.209162	-0.0206535	-0.303544	0.103939	-0.189851	-0.149567	-0.2325	-0.333782	-0.241695	-0.286326	-0.0445663	-0.061855
ASCC2	blue	0.298234	-0.458278	-0.778134	-0.303961	-0.62326	0.0673266	-0.196418	0.0402701	-0.256157	-0.331082	-0.267192	-0.087137	-0.0367249	-0.167464	-0.592745	-0.355619	-0.274059	0.282376	0.555009	0.535571	0.557053	0.711744	0.535572	0.279679	0.0339608	0.161682	0.465838	0.475883	0.199097	0.0911193	-0.0935967	-0.246658	0.0193803	-0.293069	-0.0634732	0.206898	0.184739	-0.255795	-0.343952	-0.0926319	0.037809
TXN2	blue	0.276595	-0.563378	-0.752439	-0.325567	-0.619285	-0.0270826	-0.259094	-0.0638478	-0.245286	-0.451813	-0.391788	-0.211303	-0.140972	-0.0245792	-0.514144	-0.281215	-0.12777	0.132843	0.480439	0.468902	0.663693	0.797911	0.751873	0.179261	0.0807118	-0.0410589	0.519814	0.549464	0.216437	0.138594	0.120702	-0.0912661	0.00379978	-0.299047	-0.0583741	0.26313	0.197376	-0.250699	-0.320028	-0.216668	0.0348163
RBX1	blue	0.187016	-0.64295	-0.79773	0.0721621	-0.397364	0.203135	-0.0364134	0.275477	0.147554	-0.520084	-0.334001	0.018867	-0.0905201	-0.0407217	-0.347908	0.0255767	-0.0632296	-0.114379	0.334338	0.600291	0.317427	0.782331	0.700161	0.165829	0.250388	0.184452	0.649745	0.800492	0.583516	-0.0314662	0.0182564	-0.246502	-0.0613467	-0.394426	-0.179487	-0.12668	-0.268346	-0.371018	-0.377485	-0.229059	-0.0774038
EMC9	blue	0.107022	-0.221634	-0.689128	-0.145838	-0.409444	0.296266	0.101687	0.185985	-0.182524	-0.188443	-0.339185	-0.275943	-0.465882	-0.331034	-0.712057	-0.418755	-0.575845	0.181361	0.609926	0.656549	0.54604	0.855155	0.653969	-0.0601049	0.0553507	0.0205959	0.11954	0.623859	0.137886	-0.177611	0.127131	-0.068046	0.290744	-0.0416117	-0.0877808	0.111938	-0.0760765	-0.171538	-0.324433	0.0215229	0.148129
ARFRP1	blue	0.238132	-0.183097	-0.630667	-0.192428	-0.349255	0.428595	0.130492	0.330899	0.0391315	-0.166136	-0.221432	-0.0487809	-0.213262	-0.0549341	-0.444155	-0.267668	-0.321333	0.180079	0.700605	0.741739	0.419135	0.748615	0.58963	0.0397407	0.0461658	-0.145964	0.302243	0.493585	0.121671	-0.0401714	0.105168	-0.0886427	0.142436	-0.141931	-0.238951	-0.0166947	-0.209112	-0.475307	-0.543854	-0.205192	-0.117239
NAA10	blue	0.0805262	-0.262898	-0.719079	-0.00672925	-0.308194	0.332739	0.170417	0.170283	-0.090702	-0.243549	-0.305444	-0.209919	-0.432319	-0.261787	-0.617348	-0.248503	-0.45666	0.0434838	0.539934	0.688577	0.474932	0.845176	0.688945	0.0366718	0.123037	-0.0186361	0.2669	0.730601	0.299124	-0.160702	0.149155	-0.0988949	0.0457488	-0.151841	-0.208121	0.0379257	-0.18482	-0.27628	-0.412813	-0.040536	0.0931711
PIN4	blue	0.0598816	-0.201581	-0.565063	-0.0507458	-0.268352	0.302058	0.0959192	0.305718	0.0219109	-0.159175	-0.177678	-0.00958951	-0.277106	-0.141016	-0.538685	-0.320891	-0.462216	0.0796588	0.461259	0.560726	0.399599	0.781249	0.582189	0.0203099	0.118439	-0.0343697	0.195788	0.676938	0.20258	0.000690233	0.0511602	-0.149927	0.0150121	-0.00168007	0.0340816	-0.160023	-0.169318	-0.380822	-0.239925	-0.105648	-0.256595
TRADD	blue	-0.0294441	-0.162477	-0.576821	-0.126716	-0.349807	0.378652	0.146432	0.352999	-0.0167862	-0.265352	-0.398418	-0.188996	-0.392055	-0.373922	-0.657493	-0.366777	-0.47664	0.237396	0.569937	0.647316	0.360602	0.73177	0.482036	-0.06337	0.0962566	0.208521	0.0287179	0.493022	0.111923	-0.0681521	-0.0220311	-0.222774	0.466532	-0.0931474	-0.135106	0.0160475	-0.122943	-0.195249	-0.337228	-0.0864446	0.0454141
NME3	blue	0.358941	-0.612694	-0.866153	-0.301917	-0.651607	0.113936	-0.218088	0.0945886	-0.139265	-0.467713	-0.465418	-0.203061	-0.200399	-0.0684592	-0.544445	-0.254983	-0.157182	0.0996623	0.575532	0.612048	0.614241	0.847701	0.77788	0.267777	0.0594065	0.00134539	0.566436	0.569347	0.256059	0.0952872	0.204598	-0.0144619	0.0510379	-0.358317	-0.141172	0.0838381	-0.0200924	-0.282386	-0.355766	-0.226383	0.0179357
HCFC1R1	blue	0.13445	-0.460265	-0.763347	-0.30293	-0.593039	0.125813	-0.15439	0.118899	-0.202142	-0.381239	-0.49598	-0.33271	-0.427072	-0.319236	-0.733263	-0.428132	-0.390211	0.165746	0.589783	0.551138	0.651243	0.866411	0.762476	0.075219	0.145176	-0.00298587	0.269931	0.529301	0.074027	0.0384208	0.385741	0.12284	0.359662	0.01552	0.0555323	0.0705657	-0.0161856	-0.0618785	-0.130415	0.000213401	0.108649
FAM173A	blue	0.0852929	-0.16591	-0.564053	-0.130321	-0.349729	0.324835	0.07651	0.24405	-0.0954694	-0.147972	-0.28366	-0.10762	-0.296384	-0.4136	-0.585833	-0.338229	-0.460647	0.19	0.644814	0.638617	0.514785	0.781064	0.506381	-0.0964232	-0.0259136	-0.0106474	0.0881375	0.495331	0.0861466	0.0683156	0.126973	-0.091343	0.0709822	0.0126714	0.0375023	-0.012921	-0.0619171	-0.221939	-0.292012	-0.133475	-0.0367759
TCEB2	blue	0.263542	-0.504076	-0.801763	-0.259933	-0.577186	0.135765	-0.140934	0.114445	-0.170965	-0.493914	-0.534908	-0.267608	-0.301149	-0.165112	-0.652439	-0.331248	-0.296745	0.17641	0.601614	0.610169	0.667249	0.93701	0.841611	0.166514	0.0539252	0.0336779	0.399896	0.662557	0.233758	0.16694	0.184151	-0.115276	0.0727721	-0.280224	0.00788782	0.0574242	0.0262229	-0.237363	-0.269994	-0.181447	-0.0189741
ECH1	blue	0.121734	-0.390855	-0.655503	-0.328555	-0.590053	-0.0764506	-0.164967	-0.239987	-0.501533	-0.235164	-0.322148	-0.351202	-0.256195	-0.0878883	-0.587595	-0.461909	-0.394549	0.00204507	0.325594	0.381693	0.685914	0.68259	0.623109	0.221868	-0.20879	-0.164789	0.212839	0.421175	0.0417209	0.128216	0.104481	-0.00275079	0.169331	-0.154055	-0.110728	0.463951	0.333534	0.0558441	-0.155624	0.0204252	0.318937
NFKBIB	blue	0.106724	-0.149294	-0.646486	0.0117509	-0.268779	0.469108	0.255001	0.37033	0.039944	-0.306205	-0.367547	-0.163687	-0.388101	-0.298584	-0.636563	-0.263033	-0.475365	0.263112	0.659191	0.758197	0.341498	0.782803	0.557548	-0.0775511	0.187789	0.167542	0.15175	0.651303	0.265732	-0.150961	0.0450697	-0.250039	0.200052	-0.144633	-0.228952	-0.0434044	-0.270639	-0.245784	-0.40503	0.0271074	0.101213
LIN7B	blue	0.0617993	-0.180891	-0.562465	-0.127096	-0.362173	0.37204	0.120973	0.367257	-0.0262373	-0.184859	-0.271657	-0.0875274	-0.278396	-0.257206	-0.586204	-0.381296	-0.514838	0.28498	0.601687	0.661812	0.359411	0.775955	0.48207	-0.0503222	0.00896955	0.191545	0.0818109	0.570337	0.155452	-0.0678358	-0.109383	-0.248382	0.404398	-0.0839219	-0.0730916	-0.0634406	-0.104319	-0.21197	-0.254445	-0.0113942	-0.0183793
PLEKHJ1	blue	0.125864	-0.28822	-0.656398	-0.124746	-0.39915	0.279525	0.085753	0.174131	-0.141957	-0.377175	-0.49873	-0.263966	-0.333076	-0.302107	-0.588687	-0.270643	-0.367219	0.168057	0.641378	0.690247	0.564242	0.852457	0.674688	-0.0872885	-0.0449053	0.0226397	0.15836	0.592566	0.205367	0.0949898	0.0765835	-0.155449	0.155019	-0.20854	-0.083309	0.108457	-0.0748666	-0.173292	-0.344551	-0.13048	0.144718
STX10	blue	0.316354	-0.294939	-0.689257	-0.121773	-0.316337	0.35385	0.0812067	0.181569	0.0580721	-0.328926	-0.409497	-0.248164	-0.441824	0.17577	-0.453974	-0.162415	-0.220113	-0.0279846	0.51643	0.664885	0.39339	0.731567	0.675596	0.162853	-0.0252687	-0.182689	0.429765	0.574069	0.221082	-0.14098	0.171399	-0.0302898	-0.105346	-0.28112	-0.402204	-0.00917276	-0.307266	-0.47745	-0.526682	-0.065479	-0.0371124
C19orf53	blue	0.177427	-0.283655	-0.737448	-0.175188	-0.451878	0.26745	0.0504125	0.150137	-0.186526	-0.29668	-0.429278	-0.329309	-0.476007	-0.216047	-0.741976	-0.423381	-0.53838	0.212174	0.651959	0.678391	0.612553	0.94112	0.771958	0.0669993	-0.00936788	-0.0254563	0.200529	0.70134	0.172962	-0.135274	0.196218	-0.0529179	0.195553	-0.100768	-0.079378	0.0935336	-0.0668463	-0.182365	-0.283825	0.034265	0.103801
TBCB	blue	-0.0364219	-0.124205	-0.59976	0.176878	-0.110286	0.647756	0.411429	0.502341	0.264433	-0.299832	-0.317711	-0.0136695	-0.32326	-0.236853	-0.458565	-0.0683294	-0.348579	0.0133935	0.603239	0.896442	0.216757	0.82749	0.529752	-0.0583922	0.053775	0.114725	0.241497	0.774056	0.417316	-0.107751	-0.0770404	-0.39298	-0.0168475	-0.243411	-0.376677	-0.164012	-0.438794	-0.484841	-0.582954	-0.235022	-0.0995985
POLR2I	blue	0.181046	-0.300556	-0.709564	-0.120503	-0.364395	0.427941	0.114535	0.334596	0.0880713	-0.356961	-0.413343	-0.153198	-0.364194	-0.118973	-0.540154	-0.237078	-0.34066	0.10238	0.664096	0.77156	0.460992	0.911905	0.745335	0.0576871	0.0319558	-0.0807419	0.329844	0.708603	0.263065	-0.0067822	0.186586	-0.10338	0.0905529	-0.183611	-0.188417	-0.10575	-0.273687	-0.393497	-0.449856	-0.226187	-0.0814921
ETFB	blue	0.120821	-0.263287	-0.564607	-0.293069	-0.496061	0.139253	-0.0370988	0.168653	-0.262512	-0.0901068	-0.201059	-0.0925524	-0.186825	-0.247851	-0.577493	-0.539601	-0.556144	0.156827	0.497202	0.489376	0.575534	0.792522	0.664884	0.0485041	0.0779071	-0.0910434	0.0313526	0.489194	-0.0205026	0.260263	0.104602	-0.0446399	0.449086	0.0697748	0.196916	0.0282914	0.0729901	-0.142204	-0.129755	-0.0445622	-0.026878
RABAC1	blue	0.0709257	-0.147413	-0.645737	0.176533	-0.136833	0.551707	0.392911	0.312277	0.0866414	-0.389156	-0.536528	-0.305479	-0.542669	-0.298567	-0.59541	-0.118907	-0.42411	-0.00146608	0.606645	0.857102	0.345405	0.86915	0.603504	-0.0693563	-0.0920317	0.0962235	0.150117	0.762035	0.357295	-0.209421	0.0832728	-0.238358	-0.000898397	-0.212801	-0.351148	-0.0374392	-0.378895	-0.313804	-0.482581	-0.0101036	0.0739731
CLEC11A	blue	0.257425	-0.319968	-0.564455	-0.494797	-0.636585	-0.03628	-0.262506	0.00548973	-0.402482	-0.0493539	-0.222227	-0.228011	-0.238762	-0.153602	-0.580963	-0.59393	-0.475241	0.266616	0.548094	0.341477	0.692749	0.676188	0.603285	-0.0500146	-0.118347	-0.19621	0.052859	0.254711	-0.188436	0.120779	0.296218	0.201213	0.394473	0.151171	0.282143	0.183024	0.204145	0.0586536	-0.0134792	-0.0116097	0.163307
TMEM205	blue	0.159178	-0.402006	-0.766719	0.00162043	-0.396403	0.166846	0.0684853	0.0021071	-0.21311	-0.283112	-0.303142	-0.272375	-0.33416	-0.00342851	-0.55521	-0.212964	-0.368378	-0.0744932	0.344871	0.593383	0.451959	0.748739	0.663003	0.281162	0.0253111	0.0628862	0.381624	0.690261	0.36044	-0.208753	-0.0510729	-0.199383	-0.0651031	-0.406814	-0.375322	0.229745	-0.0794127	-0.267218	-0.404167	0.0470741	0.167657
WDR83OS	blue	0.235412	-0.37479	-0.758273	-0.0653445	-0.383795	0.331721	0.0755355	0.190703	0.022286	-0.460727	-0.46585	-0.256848	-0.380991	-0.0371978	-0.56767	-0.160304	-0.261588	0.0954279	0.547762	0.711463	0.440371	0.851333	0.73062	0.228857	0.0171619	0.0667516	0.460002	0.735862	0.370341	-0.122516	0.104938	-0.207669	-0.0926311	-0.381542	-0.2807	0.0011325	-0.203068	-0.368614	-0.443466	-0.116761	-0.00919686
LENG1	blue	0.0704803	0.0172578	-0.467525	-0.0502153	-0.150353	0.53281	0.29819	0.42323	0.112225	-0.119621	-0.2865	-0.122043	-0.419861	-0.168454	-0.536122	-0.287211	-0.486734	0.199294	0.667154	0.747358	0.345953	0.782319	0.544206	-0.132101	0.027889	-0.11347	0.0120663	0.594577	0.118673	-0.093929	0.0566721	-0.113127	0.17816	0.0214388	-0.146191	-0.171037	-0.357327	-0.38494	-0.427907	-0.0385702	-0.0661578
PRPF31	blue	0.432254	-0.419049	-0.770818	-0.0804962	-0.409708	0.367151	0.0611398	0.311656	0.111665	-0.390879	-0.286495	0.0256728	-0.0721165	0.0630064	-0.368433	-0.0703822	-0.129755	0.196628	0.608528	0.748368	0.312969	0.737673	0.557673	0.191485	0.0545113	0.130154	0.593573	0.648087	0.42798	-0.0579483	-0.160642	-0.314087	-0.0695638	-0.514103	-0.366553	-0.058045	-0.219578	-0.506447	-0.574551	-0.239472	-0.107218
TFPT	blue	0.330151	-0.446354	-0.675534	-0.41765	-0.633907	-0.00111764	-0.268578	-0.0169129	-0.312369	-0.360995	-0.482698	-0.353059	-0.324849	-0.149823	-0.607237	-0.444773	-0.321086	0.207414	0.570584	0.427401	0.721346	0.794481	0.805793	0.13282	0.0050564	-0.141481	0.25176	0.409499	-0.0162879	0.301934	0.40842	0.15776	0.187664	-0.0888814	0.159874	0.0890559	0.107361	-0.0534302	-0.101667	-0.048859	0.0930091
COPE	blue	0.162855	-0.297229	-0.657863	-0.222722	-0.483662	0.126932	0.00542761	-0.0318778	-0.333198	-0.213743	-0.275813	-0.197881	-0.183918	-0.0434829	-0.545463	-0.382476	-0.419218	0.0546095	0.483843	0.58621	0.628729	0.793564	0.643781	0.0833327	-0.21013	-0.153854	0.224442	0.56049	0.146414	0.0836197	-0.121757	-0.222749	0.0429732	-0.22541	-0.159824	0.356864	0.143508	-0.207674	-0.371656	-0.108204	0.175891
TMEM147	blue	0.0753343	-0.16344	-0.594367	-0.138602	-0.384056	0.155701	0.0882287	-0.100865	-0.356089	-0.221985	-0.493113	-0.569138	-0.654856	-0.23273	-0.750557	-0.447741	-0.597003	0.0253752	0.428852	0.516485	0.610414	0.773788	0.648513	0.0241699	-0.314184	-0.139256	-0.039172	0.542311	0.0408382	-0.173075	0.200214	0.0708112	0.132607	-0.035165	-0.156354	0.344487	0.0149293	0.0566164	-0.179286	0.178202	0.380556
NUDT1	blue	0.00407179	-0.140538	-0.529473	0.187691	-0.131497	0.495014	0.349899	0.44064	0.145314	-0.201591	-0.254414	-0.0254718	-0.292188	-0.267093	-0.47152	-0.179344	-0.466531	-0.000205104	0.448643	0.72713	0.192131	0.756765	0.437505	0.0766946	0.0269735	0.217169	0.0888746	0.720896	0.330808	-0.14121	-0.156483	-0.379329	0.105013	-0.154057	-0.188826	-0.141721	-0.317757	-0.402395	-0.374896	-0.103667	-0.173987
MOSPD3	blue	0.316121	-0.368293	-0.653031	-0.362906	-0.547723	0.0938645	-0.187815	0.00271681	-0.235117	-0.415086	-0.468158	-0.233475	-0.133597	-0.0369672	-0.537594	-0.309115	-0.167175	0.27388	0.662207	0.557875	0.640628	0.753923	0.661565	0.127672	-0.0491782	-0.0215723	0.377782	0.374817	0.0719955	0.219999	0.0248274	-0.175772	-0.0645722	-0.299677	-0.0895652	0.202772	0.145094	-0.296962	-0.342358	-0.117884	-0.0148261
ZNHIT1	blue	0.277514	-0.558958	-0.851383	-0.234106	-0.588065	0.1524	-0.13861	0.0997951	-0.132328	-0.466687	-0.46097	-0.229869	-0.272156	-0.065428	-0.585694	-0.255843	-0.233606	0.0872382	0.542954	0.644816	0.589406	0.896542	0.769004	0.247755	-0.00758734	0.0361214	0.52818	0.683847	0.315986	-0.0308105	0.120395	-0.127842	0.0354722	-0.381939	-0.201596	0.115341	-0.0264356	-0.283448	-0.357587	-0.180501	0.0293171
SEC61B	blue	0.00419978	-0.450659	-0.65172	0.109823	-0.334448	0.0787703	0.0217035	0.0182512	-0.14952	-0.435822	-0.403589	-0.28401	-0.280593	-0.0709864	-0.482434	-0.0830266	-0.276769	-0.0507968	0.272761	0.507768	0.429114	0.744509	0.656724	0.0782149	-0.0348171	0.166065	0.321514	0.771151	0.494925	-0.183438	-0.0707773	-0.28989	-0.107217	-0.385849	-0.258585	0.214944	-0.0825636	-0.0539803	-0.242474	0.0793851	0.318994
EDF1	blue	0.211677	-0.321223	-0.782041	-0.140329	-0.441447	0.352923	0.0890188	0.260492	-0.0621326	-0.314729	-0.333764	-0.138879	-0.29843	-0.127224	-0.63743	-0.323109	-0.433522	0.192577	0.647587	0.761091	0.508857	0.923147	0.742244	0.152054	0.0607122	0.0371805	0.365789	0.752679	0.298956	-0.0393531	0.0223653	-0.252645	0.0955265	-0.257923	-0.195458	0.00373225	-0.131719	-0.387414	-0.454314	-0.108607	-0.0330707
FBXL15	blue	0.2556	-0.21078	-0.580385	-0.197606	-0.381792	0.315315	0.0183856	0.229314	-0.0402254	-0.360695	-0.5113	-0.295321	-0.398398	-0.27549	-0.551203	-0.260722	-0.287455	0.426521	0.779529	0.632816	0.466514	0.723866	0.578074	-0.126364	-0.0208576	0.130007	0.1706	0.402441	0.0787182	-0.0196113	0.222635	-0.0497748	0.118662	-0.191864	-0.0965793	0.0118917	-0.124795	-0.163017	-0.281001	-0.0795043	0.0803352
CUEDC2	blue	0.0184214	0.0271973	-0.422596	-0.300621	-0.330315	0.299646	0.125098	0.139767	-0.238514	-0.0350818	-0.318762	-0.272973	-0.410102	-0.242577	-0.623508	-0.524776	-0.57323	0.199839	0.63043	0.579953	0.58002	0.744838	0.542433	-0.0845391	-0.168542	-0.227051	-0.157468	0.354028	-0.176146	0.0961143	0.118284	0.00549164	0.347997	0.11654	0.0288198	0.155171	0.0405926	-0.183864	-0.245128	-0.0284687	0.00801426
MRPL27	blue	0.25886	-0.319427	-0.648308	-0.0408547	-0.309795	0.240505	0.0530199	0.201882	-0.0132238	-0.243482	-0.259807	-0.0819913	-0.298278	-0.111516	-0.538996	-0.264072	-0.395177	-0.038296	0.41747	0.540716	0.426541	0.764477	0.600952	0.180686	0.148855	-0.108915	0.311011	0.685486	0.251336	-0.112944	0.158966	0.00469548	-0.0278764	-0.0424883	0.0143238	-0.138323	-0.198698	-0.378995	-0.259362	-0.0864011	-0.215418
DNAJC4	blue	0.133115	-0.413088	-0.671162	-0.363628	-0.567725	-0.0465278	-0.255528	-0.137884	-0.384816	-0.394793	-0.552402	-0.41913	-0.352023	-0.387186	-0.665053	-0.3869	-0.267097	0.206245	0.554598	0.386755	0.666097	0.690332	0.669535	0.162549	0.0481881	0.0237997	0.202173	0.287941	-0.0393874	0.170642	0.427216	0.194704	0.223089	-0.0373496	0.112758	0.159042	0.151368	0.0333056	-0.0476884	0.0220022	0.131567
AIP	blue	0.177888	-0.105315	-0.589767	-0.120196	-0.239923	0.447109	0.189091	0.206062	0.0435366	-0.305825	-0.537521	-0.425832	-0.656509	-0.0863994	-0.602689	-0.242413	-0.379547	0.0902631	0.645205	0.706192	0.42909	0.7933	0.681996	0.0276096	-0.0992095	-0.184236	0.171369	0.570042	0.113715	-0.23855	0.364061	0.129731	0.0745182	-0.0906339	-0.303805	-0.0339944	-0.343953	-0.252263	-0.389887	-0.00558942	0.0874146
NDUFS8	blue	0.166294	-0.325445	-0.765666	-0.217643	-0.501307	0.280092	0.0288529	0.141973	-0.191437	-0.301329	-0.450649	-0.312842	-0.449286	-0.305025	-0.724141	-0.417475	-0.505559	0.160762	0.654593	0.699323	0.610099	0.930085	0.694118	0.0582919	-0.150024	-0.0332556	0.211296	0.659313	0.164198	-0.0471395	0.198044	-0.0138529	0.261892	-0.0809347	-0.0749772	0.0807405	-0.042583	-0.139106	-0.268189	-0.0820647	0.102615
MRPL51	blue	0.141068	-0.31313	-0.650097	-0.103096	-0.386279	0.137617	0.010418	0.0465864	-0.204901	-0.324519	-0.49109	-0.416855	-0.55224	-0.195979	-0.697193	-0.363723	-0.502321	0.00643818	0.441109	0.512259	0.600975	0.872318	0.817569	0.0824665	0.0133322	-0.10564	0.129818	0.698138	0.179116	-0.192933	0.315917	0.0681889	0.113671	-0.0521174	0.022431	0.0942221	-0.092658	-0.0519388	-0.111432	0.0502269	0.151318
COX6A1	blue	0.159522	-0.274447	-0.541135	-0.398552	-0.575674	-0.0325629	-0.203213	0.0217406	-0.385533	-0.110646	-0.282962	-0.261763	-0.303179	-0.306979	-0.678164	-0.63096	-0.567016	0.29538	0.45444	0.30987	0.652157	0.723559	0.626478	0.0261565	0.0170132	-0.0795108	-0.024569	0.378084	-0.127633	0.197978	0.23952	0.107654	0.50681	0.159064	0.271371	0.138431	0.239347	0.0359073	0.00711243	0.066289	0.0836022
CUTA	blue	-0.010664	-0.0425291	-0.556235	0.262568	-0.0281246	0.594176	0.478628	0.3996	0.169204	-0.180991	-0.271866	-0.139206	-0.475252	-0.169367	-0.502543	-0.134348	-0.542225	-0.0365777	0.459531	0.794251	0.152305	0.768083	0.455671	-0.0179986	-0.163162	0.111256	0.0907339	0.81373	0.393667	-0.390709	-0.0833195	-0.304573	0.0290944	-0.143207	-0.371309	-0.138822	-0.458251	-0.339278	-0.411967	0.0346734	-0.01495
MRPL2	blue	-0.0744199	-0.0121481	-0.341833	0.210884	-0.0244784	0.397784	0.4054	0.325956	0.0201943	-0.0818073	-0.13817	0.021441	-0.181978	-0.228033	-0.365309	-0.198279	-0.490139	-0.0929371	0.307368	0.59554	0.220166	0.650376	0.375613	-0.0750066	-0.0789115	0.0338141	-0.0845061	0.639798	0.245708	-0.0513275	-0.214708	-0.407429	0.094552	0.0132283	-0.069705	-0.0376857	-0.201423	-0.259715	-0.260245	-0.0138817	-0.0718217
DNPH1	blue	0.159885	-0.23091	-0.446732	-0.467578	-0.547837	-0.118342	-0.255248	-0.155806	-0.509302	-0.0826162	-0.326643	-0.33625	-0.282919	-0.135548	-0.611691	-0.612214	-0.476155	0.128243	0.445862	0.265189	0.792258	0.682076	0.660953	-0.000761705	-0.0719028	-0.314822	-0.061736	0.215444	-0.270733	0.270535	0.23944	0.173448	0.240181	0.174962	0.295984	0.299177	0.318572	0.0357279	0.037655	0.0797333	0.119733
RNF7	blue	0.186622	-0.64093	-0.773048	0.0871913	-0.410748	0.0598498	-0.101803	0.0770856	-0.015676	-0.616594	-0.506082	-0.248266	-0.240257	-0.0751925	-0.433794	0.0414965	-0.0688125	0.00122638	0.304687	0.495474	0.391377	0.738299	0.69056	0.103939	0.0489928	0.307165	0.572572	0.773954	0.592322	-0.130047	0.0465393	-0.238924	-0.183017	-0.521294	-0.231607	0.0631804	-0.131509	-0.0886826	-0.197158	-0.0497055	0.181172
AUP1	blue	0.10675	-0.205311	-0.686306	0.0833512	-0.198356	0.394963	0.21525	0.125437	0.030286	-0.34815	-0.447109	-0.379563	-0.593626	-0.16289	-0.556333	-0.0759487	-0.284795	0.0422923	0.474608	0.664159	0.267354	0.640998	0.46551	0.059359	-0.122407	0.141742	0.319113	0.593673	0.326748	-0.383508	0.153809	-0.101875	-0.122283	-0.28337	-0.54828	0.0687647	-0.303928	-0.244167	-0.445128	0.109397	0.162606
PARK7	blue	0.0860836	-0.286126	-0.629234	-0.00601598	-0.328688	0.0669978	0.0584898	-0.0835388	-0.318054	-0.264324	-0.350198	-0.356021	-0.419284	-0.134654	-0.628009	-0.328829	-0.519829	0.000454399	0.319602	0.456163	0.55418	0.784198	0.676303	0.146143	-0.128278	-0.0189564	0.142292	0.735895	0.276942	-0.191223	0.0414462	-0.153178	-0.00339538	-0.153415	-0.088053	0.255851	0.0609128	-0.0704624	-0.166308	0.137949	0.200107
LAMTOR2	blue	0.117149	-0.292555	-0.711079	-0.194541	-0.476392	0.161171	-0.0227047	0.0594896	-0.286805	-0.309523	-0.508034	-0.42967	-0.55219	-0.276287	-0.810807	-0.474075	-0.573291	0.164631	0.561772	0.58132	0.670578	0.90232	0.727218	0.0415362	-0.0761095	0.00607303	0.128301	0.625133	0.0954975	-0.121072	0.18073	-0.0416835	0.157183	-0.0591594	-0.0369833	0.188178	0.0316408	-0.0835238	-0.146452	0.156347	0.126391
SRM	blue	0.161493	-0.433382	-0.657441	-0.359586	-0.600501	0.121358	-0.163474	0.158231	-0.174717	-0.352605	-0.357288	-0.111349	-0.0999024	-0.26332	-0.537405	-0.344856	-0.213417	0.304182	0.580114	0.525513	0.492039	0.682395	0.577453	0.134182	0.265592	0.138708	0.30568	0.357734	0.0896993	0.234257	0.0625346	-0.0623036	0.493585	-0.211605	-0.0111909	0.0947135	0.0797892	-0.18651	-0.337792	-0.183711	0.093791
MRPS15	blue	0.165205	-0.405867	-0.753077	0.0301788	-0.334045	0.30176	0.0921001	0.195221	0.0299561	-0.523288	-0.551681	-0.305172	-0.463387	-0.322331	-0.610796	-0.126011	-0.299772	0.0442496	0.462971	0.64083	0.362012	0.800407	0.615393	0.112129	-0.0238275	0.202556	0.359142	0.75225	0.431892	-0.214568	0.177906	-0.126392	0.126493	-0.25669	-0.186103	-0.0758543	-0.237157	-0.117545	-0.277351	-0.0996649	0.115254
NDUFA8	blue	-0.102593	-0.246374	-0.532664	0.330942	-0.0519794	0.387972	0.307297	0.324008	0.161548	-0.323573	-0.316279	-0.0970461	-0.377031	-0.411098	-0.439138	-0.0194462	-0.360839	-0.0900742	0.283633	0.589904	0.137363	0.701841	0.410912	-0.016716	0.0450212	0.336753	0.161142	0.821119	0.509339	-0.236844	0.0374829	-0.242604	0.0637162	-0.160998	-0.130365	-0.23915	-0.329633	-0.173403	-0.143323	-0.0388865	-0.108703
C19orf25	blue	0.297813	-0.371136	-0.697639	-0.324115	-0.508334	0.214348	-0.12797	0.0968483	-0.0897341	-0.470747	-0.502213	-0.214879	-0.229882	-0.163587	-0.501267	-0.214647	-0.0905225	0.32119	0.718229	0.616699	0.545537	0.718892	0.549109	-0.00587907	-0.0953174	0.0550237	0.44284	0.380929	0.129075	0.137877	0.12166	-0.129092	-0.00158668	-0.336237	-0.16148	0.146964	0.0647564	-0.293881	-0.369693	-0.248836	-0.0477237
SLIRP	blue	0.218332	-0.439832	-0.635732	-0.0587428	-0.382815	0.140843	-0.0441649	0.250542	-0.00194218	-0.302405	-0.251352	-0.0147337	-0.136564	-0.070477	-0.440017	-0.236085	-0.316595	-0.0443706	0.306877	0.471967	0.397381	0.7791	0.722393	0.28152	0.137703	-0.0072526	0.366677	0.733016	0.338293	0.0557733	0.112747	-0.123067	0.0652234	-0.149824	0.0958785	-0.179282	-0.148866	-0.28086	-0.169417	-0.143225	-0.174904
MRPS2	blue	0.273897	-0.323932	-0.75705	-0.0875833	-0.406487	0.272325	0.118885	0.0184622	-0.189959	-0.360374	-0.478257	-0.391678	-0.448532	-0.131952	-0.601996	-0.258523	-0.358206	-0.0448754	0.499154	0.672792	0.515402	0.773105	0.644044	0.212023	-0.184511	-0.0313505	0.294533	0.585397	0.23064	-0.115609	0.134428	-0.0957288	-0.0176066	-0.289265	-0.336198	0.267476	-0.0529248	-0.21783	-0.469562	-0.0839087	0.207588
C19orf43	blue	0.0898169	-0.161684	-0.576464	-0.125965	-0.309018	0.262717	0.0872743	0.132643	-0.118434	-0.257995	-0.452227	-0.385628	-0.572961	-0.14188	-0.664299	-0.347424	-0.506055	0.109325	0.560922	0.575883	0.527379	0.829459	0.773554	-0.0363438	0.0200039	-0.173183	0.0770405	0.626097	0.115632	-0.19998	0.334487	0.0870646	0.120203	0.0109594	-0.0638931	0.00285768	-0.219594	-0.114928	-0.239802	0.0596646	0.167148
WDR83	blue	0.20305	-0.299125	-0.586476	0.119662	-0.217672	0.42006	0.211664	0.412736	0.178848	-0.303329	-0.27114	0.00177409	-0.205641	-0.190591	-0.376981	-0.07773	-0.244037	0.0569048	0.466875	0.671122	0.217107	0.713836	0.483962	0.0237004	0.209549	0.222568	0.288794	0.682581	0.403018	0.0108213	-0.0114318	-0.260836	0.117899	-0.260656	-0.176156	-0.230061	-0.295972	-0.360678	-0.328427	-0.18892	-0.185914
ATP5E	blue	0.17299	-0.473352	-0.714864	-0.143082	-0.491978	0.0191939	-0.132496	0.0577759	-0.224185	-0.365364	-0.398772	-0.263449	-0.320229	-0.144489	-0.618361	-0.347769	-0.417276	0.112409	0.409473	0.442436	0.584874	0.85517	0.818101	0.105635	0.108262	0.0612895	0.284316	0.721933	0.273789	-0.011044	0.166388	-0.0577961	0.145011	-0.170627	0.0956189	0.0552369	0.0204068	-0.0868851	-0.111123	0.0372195	0.0894515
SNRPC	blue	0.0398282	-0.303425	-0.590316	0.0911904	-0.214688	0.328508	0.108898	0.285568	0.165579	-0.401718	-0.383784	-0.14866	-0.289013	-0.0720685	-0.394455	0.000863521	-0.17976	0.0892406	0.466144	0.630689	0.28966	0.732554	0.532877	-0.0422765	-0.120857	0.134425	0.396614	0.736204	0.452877	-0.211504	0.0591585	-0.20784	-0.201187	-0.305486	-0.268836	-0.0875989	-0.290369	-0.253231	-0.273171	-0.0746368	-0.0203176
NDUFA1	blue	0.0192932	-0.303137	-0.516238	-0.0918251	-0.353208	0.0213504	-0.051719	0.0789414	-0.207286	-0.205653	-0.306702	-0.265079	-0.38062	-0.201334	-0.582	-0.39285	-0.47806	0.0351351	0.277941	0.336535	0.530192	0.753663	0.697774	0.028775	0.0796005	-0.0326745	0.0574808	0.623882	0.137249	-0.00889071	0.211211	-0.0152059	0.190865	0.077215	0.181135	0.0537834	0.0296444	-0.0178766	0.0121656	0.111955	0.0567893
NT5C	blue	0.361154	-0.329795	-0.589831	-0.268029	-0.516817	0.0844159	-0.120505	0.190453	-0.205422	-0.0252953	-0.0227859	0.129392	0.102241	0.0391352	-0.405179	-0.415913	-0.389696	0.0913337	0.457956	0.480087	0.522408	0.672583	0.53891	0.143618	-0.000630095	-0.169703	0.259012	0.437642	0.0782101	0.122248	-0.150356	-0.172335	0.0593112	-0.0464691	0.0904653	0.105947	0.0624654	-0.311984	-0.269973	-0.11029	-0.0736086
ALKBH7	blue	0.18477	-0.318901	-0.692917	-0.254108	-0.507302	0.139191	-0.0586499	0.0456371	-0.297765	-0.289884	-0.444295	-0.33832	-0.373201	-0.124952	-0.674607	-0.421262	-0.471481	0.206582	0.634753	0.606097	0.696615	0.895501	0.769271	0.000329756	-0.107167	-0.0612112	0.176742	0.578745	0.104638	-0.0269787	0.0960988	-0.094544	0.0769385	-0.18634	-0.0562802	0.227652	0.0508697	-0.134748	-0.262698	-0.0145886	0.167811
ITPA	blue	0.296872	-0.433409	-0.665309	-0.0569909	-0.372281	0.273917	0.0138985	0.356798	0.102211	-0.286812	-0.145693	0.176209	0.0198033	0.0349043	-0.343419	-0.14529	-0.242857	0.0534771	0.467301	0.627207	0.306727	0.758947	0.585559	0.177095	0.186046	0.0815334	0.487706	0.711073	0.400043	-0.0411664	-0.128574	-0.276066	0.00582973	-0.320819	-0.0630775	-0.188851	-0.243801	-0.507318	-0.400354	-0.23377	-0.228847
MRPS26	blue	0.292548	-0.337163	-0.724103	-0.279891	-0.501578	0.197629	-0.0367733	0.12176	-0.182623	-0.183675	-0.306916	-0.209498	-0.351958	-0.0255564	-0.619701	-0.438366	-0.459363	-0.00376266	0.522031	0.60186	0.608949	0.861191	0.748597	0.208297	-0.0503834	-0.303627	0.27751	0.602783	0.0957326	-0.0689827	0.219211	0.0787978	0.159226	-0.00758354	-0.0478175	0.0616189	-0.0857749	-0.261894	-0.310688	-0.106196	0.0147892
DYNLRB1	blue	0.0643272	-0.0999507	-0.614665	0.178785	-0.117646	0.487315	0.360913	0.230222	0.0450165	-0.239382	-0.348259	-0.289093	-0.560594	-0.221212	-0.578563	-0.153417	-0.497977	0.00962829	0.489958	0.738781	0.238845	0.749821	0.50013	0.0887861	-0.124205	0.0869151	0.170436	0.75891	0.363255	-0.430105	0.0786969	-0.15528	-0.00764895	-0.184616	-0.454003	-0.00455374	-0.369576	-0.271819	-0.436426	0.0977883	0.130551
ROMO1	blue	0.114192	-0.457211	-0.680348	-0.242671	-0.551736	-0.0379456	-0.165721	-0.0365315	-0.346675	-0.318659	-0.429723	-0.322077	-0.312715	-0.14046	-0.63774	-0.428418	-0.422424	0.00715872	0.390963	0.434214	0.706211	0.85412	0.832886	0.174097	-0.0131813	-0.139212	0.190081	0.596934	0.114968	0.100099	0.192055	0.00985447	0.107617	-0.0813416	0.0868517	0.224755	0.088165	-0.0662231	-0.130471	0.00822729	0.172056
COX6B1	blue	0.0884172	-0.25701	-0.597704	-0.0107449	-0.317602	0.18895	0.115135	0.108202	-0.177008	-0.153015	-0.248651	-0.244604	-0.388714	-0.138953	-0.591899	-0.352746	-0.538022	-0.0187729	0.337325	0.518139	0.443866	0.775726	0.624598	0.15123	-0.045758	-0.0365953	0.132354	0.704417	0.227432	-0.14903	0.118501	-0.0749163	0.12254	-0.0534919	-0.0989371	0.0594677	-0.0941969	-0.138061	-0.188329	0.065411	0.0828592
TIMM17B	blue	0.0538883	-0.094004	-0.511672	0.0345879	-0.144202	0.404977	0.265403	0.137599	0.0191929	-0.223037	-0.350654	-0.315125	-0.436475	0.0507222	-0.419284	-0.095895	-0.307087	-0.00607986	0.46409	0.684824	0.303731	0.699815	0.561518	0.059144	-0.241688	-0.0814953	0.211495	0.617049	0.277588	-0.325037	0.0190811	-0.177624	-0.089074	-0.2876	-0.525183	0.100182	-0.287311	-0.27957	-0.478671	0.0359809	0.179153
COX7C	blue	0.0715372	-0.476528	-0.590998	-0.183691	-0.489333	-0.141099	-0.212754	-0.0941249	-0.330095	-0.345084	-0.447974	-0.404945	-0.393063	-0.198642	-0.582271	-0.364203	-0.386793	0.0332448	0.260414	0.257648	0.612486	0.760326	0.832529	0.112632	0.0814849	-0.0317312	0.131735	0.589186	0.15187	0.0283079	0.339536	0.148179	0.310059	-0.0257595	0.183799	0.141471	0.088448	0.151813	0.0652056	0.0979583	0.259123
UQCR11	blue	0.16543	-0.354499	-0.621755	-0.36728	-0.586563	0.0154118	-0.198999	0.0540482	-0.334149	-0.253596	-0.429489	-0.312916	-0.355702	-0.246649	-0.71269	-0.556466	-0.502379	0.235243	0.546731	0.435889	0.737681	0.867584	0.764695	-0.00269096	0.0384772	-0.0835801	0.0835263	0.492793	-0.042436	0.178576	0.250667	0.0627268	0.3231	0.0362352	0.225791	0.134855	0.168089	-0.0375593	-0.0453126	0.0170355	0.0584494
EMC6	blue	0.00851176	-0.279728	-0.637015	0.10206	-0.256534	0.335599	0.166912	0.202816	0.00943725	-0.455507	-0.5489	-0.340792	-0.489037	-0.314767	-0.593963	-0.119431	-0.354975	0.0954726	0.516455	0.67352	0.418764	0.830032	0.573863	-0.191738	-0.168878	0.211192	0.186687	0.745852	0.402847	-0.188705	0.0590111	-0.243033	-0.0494024	-0.271962	-0.199294	0.0471003	-0.182183	-0.0859481	-0.263015	-0.0649857	0.169211
ECHS1	blue	-0.0409731	-0.350653	-0.642564	0.0607259	-0.305819	0.193011	0.0786742	0.082316	-0.129698	-0.361941	-0.283073	-0.0633354	-0.117988	-0.337221	-0.478164	-0.129509	-0.272123	0.0973148	0.411853	0.569344	0.388279	0.731115	0.493807	0.0942805	0.101284	0.328476	0.327994	0.66968	0.406745	0.0705096	-0.159306	-0.40171	-0.038507	-0.37858	-0.0992201	0.0608395	0.0672346	-0.262431	-0.282907	-0.122499	-0.0920615
DGCR6L	blue	0.409265	-0.508514	-0.724632	-0.410369	-0.622122	0.0651359	-0.296258	0.100444	-0.13062	-0.512318	-0.477123	-0.126114	-0.0696994	-0.117041	-0.52641	-0.26564	-0.083165	0.352622	0.656234	0.500046	0.613531	0.759468	0.698749	0.1968	0.129479	0.0260986	0.5247	0.440803	0.155193	0.32635	0.206244	-0.0485703	0.0592558	-0.303851	0.135164	-0.0615449	0.0889223	-0.264975	-0.229839	-0.272199	-0.165965
ATP6V1F	blue	-0.107361	-0.0992924	-0.490023	0.146718	-0.137488	0.378864	0.289915	0.24017	-0.0179048	-0.231609	-0.350875	-0.26846	-0.458063	-0.259921	-0.585563	-0.224259	-0.508147	0.0343152	0.422739	0.643893	0.310784	0.768123	0.508689	-0.0506075	-0.0707158	0.139712	0.0412565	0.721059	0.296877	-0.227014	0.0130915	-0.234747	0.0889343	-0.056463	-0.209999	-0.0170009	-0.220987	-0.121796	-0.204221	0.184002	0.102041
MRPS12	blue	-0.0738914	-0.00677632	-0.400123	0.265945	0.0210922	0.549565	0.431396	0.368409	0.176071	-0.279754	-0.413843	-0.21475	-0.423129	-0.279063	-0.451615	-0.050358	-0.384565	0.0649041	0.517284	0.755443	0.181567	0.713892	0.359968	-0.116851	-0.162135	0.221845	0.00948523	0.692457	0.356911	-0.297312	-0.0700658	-0.334268	-0.0597233	-0.192174	-0.304534	-0.0992511	-0.362378	-0.254426	-0.327341	0.028325	-0.00378562
GAMT	blue	0.182487	-0.238779	-0.636261	-0.0357598	-0.274166	0.536319	0.208137	0.553333	0.225608	-0.157306	-0.125288	0.166013	-0.103966	-0.113314	-0.407861	-0.182506	-0.33704	0.070307	0.620963	0.794338	0.269091	0.782776	0.52561	0.058345	0.198579	-0.0137749	0.350831	0.642569	0.282127	0.0188123	0.0463814	-0.199785	0.132491	-0.126491	-0.124997	-0.328931	-0.38132	-0.548741	-0.50651	-0.310962	-0.304973
ELOF1	blue	0.28212	-0.304438	-0.680333	-0.175436	-0.363229	0.367906	0.0314386	0.211046	0.0858566	-0.426991	-0.486534	-0.284845	-0.410796	0.00835537	-0.516217	-0.145544	-0.15815	0.144793	0.656282	0.699851	0.42688	0.757019	0.645691	0.112974	0.0739008	-0.0715093	0.451257	0.536082	0.218248	-0.148708	0.259998	0.00984678	-0.038439	-0.266895	-0.331004	-0.0296471	-0.256931	-0.367377	-0.456838	-0.10726	-0.00728961
PGLS	blue	0.286727	-0.477797	-0.805844	-0.381056	-0.654946	0.0361572	-0.224183	-0.0575157	-0.329186	-0.396902	-0.453069	-0.291587	-0.239298	-0.034936	-0.651049	-0.390975	-0.298489	0.197909	0.58277	0.548771	0.674958	0.794511	0.707511	0.211708	-0.126244	-0.0318602	0.419669	0.480676	0.121646	0.00745539	0.0584022	-0.0829851	0.0593421	-0.294491	-0.146481	0.279274	0.118862	-0.176487	-0.312435	-0.0548402	0.153453
LSM7	blue	0.171552	-0.296777	-0.675236	-0.28645	-0.498445	0.175049	-0.0408092	0.0257244	-0.25852	-0.337688	-0.542373	-0.458775	-0.518645	-0.159796	-0.694307	-0.423268	-0.45011	0.119103	0.565947	0.592053	0.630337	0.850826	0.76277	0.131591	-0.191246	-0.156025	0.166276	0.553528	0.072404	-0.0759107	0.274176	0.0717535	0.204669	-0.113583	-0.171867	0.19415	-0.0597148	-0.0892728	-0.293962	0.023281	0.275086
LSM4	blue	-0.0862437	-0.307064	-0.659335	0.108492	-0.256585	0.37901	0.188903	0.279215	0.0439157	-0.443434	-0.456181	-0.129228	-0.305473	-0.521319	-0.569288	-0.0985458	-0.301226	0.101166	0.550975	0.722038	0.356648	0.830558	0.569004	0.0173501	0.164452	0.288267	0.261793	0.729318	0.414938	-0.00278269	0.0527173	-0.260263	0.10542	-0.261665	-0.136312	-0.0884162	-0.196043	-0.258941	-0.332736	-0.179698	-0.0352626
CHMP2A	blue	0.286672	-0.399994	-0.743802	-0.200738	-0.512752	0.151753	-0.00957536	0.103284	-0.226996	-0.234975	-0.239942	-0.143802	-0.203583	0.0767141	-0.5615	-0.406801	-0.466096	0.0252749	0.441502	0.59433	0.561615	0.848278	0.741302	0.256782	-0.050888	-0.131203	0.319596	0.706725	0.240662	-0.0237416	-0.043622	-0.196641	0.140067	-0.226566	-0.138677	0.166487	-0.00115152	-0.278896	-0.365929	-0.0888973	0.078256
C16orf13	blue	0.284787	-0.427482	-0.837015	-0.185544	-0.529129	0.252394	-0.0391981	0.171034	-0.112286	-0.411137	-0.46491	-0.297086	-0.380311	-0.082734	-0.658675	-0.289976	-0.345498	0.212248	0.634559	0.69675	0.532566	0.862614	0.719699	0.143913	-0.0266052	0.112107	0.431537	0.65135	0.280727	-0.133606	0.136241	-0.158751	0.0443702	-0.316272	-0.256601	0.0904142	-0.0974513	-0.217156	-0.356144	0.00184577	0.114589
EIF3G	blue	0.113303	-0.00525111	-0.510718	0.00716225	-0.13291	0.442122	0.316525	0.219961	-0.0218043	-0.189891	-0.403904	-0.352773	-0.566412	-0.00477336	-0.56807	-0.257766	-0.510738	0.0490897	0.553959	0.700137	0.368908	0.752297	0.672258	0.0236364	-0.0841502	-0.171106	0.0365739	0.616965	0.141451	-0.255453	0.159299	-0.0540269	0.0414589	-0.102094	-0.344009	0.00869782	-0.387812	-0.258653	-0.417265	0.149522	0.17796
ZNF428	blue	0.142871	-0.266243	-0.627897	-0.171893	-0.42498	0.2058	0.0135051	0.129864	-0.200609	-0.209512	-0.339595	-0.234307	-0.354452	-0.182388	-0.604686	-0.372033	-0.470707	0.149861	0.596778	0.599512	0.605129	0.835483	0.674255	-0.0873828	-0.054257	-0.0871574	0.136748	0.573243	0.122053	-0.0313878	0.135198	-0.0721566	0.0532305	-0.0956418	-0.0392668	0.144024	-0.0272322	-0.181878	-0.296613	-0.0783225	0.109347
COX4I1	blue	0.206051	-0.452004	-0.705495	-0.243488	-0.554177	0.0588326	-0.125869	0.109681	-0.259006	-0.293178	-0.375953	-0.222615	-0.289026	-0.272709	-0.64659	-0.457072	-0.476455	0.112031	0.471154	0.481206	0.618675	0.873943	0.801105	0.155908	0.113212	-0.0147965	0.193135	0.630252	0.138325	0.110792	0.276393	0.0376684	0.372362	-0.0100026	0.204907	0.00688877	0.0295068	-0.0528629	-0.0815519	-0.0348972	0.0624036
PRR7	blue	0.30851	-0.341082	-0.600255	-0.403489	-0.568457	0.163637	-0.225414	0.229627	-0.0622803	-0.377617	-0.408686	-0.142579	-0.151583	-0.0911805	-0.529477	-0.320615	-0.207094	0.503837	0.727474	0.514459	0.529189	0.691397	0.541958	-0.0342527	0.0139129	0.0618194	0.322686	0.360742	0.0748017	0.139849	0.0886258	-0.0910562	0.10699	-0.249315	0.0430951	-0.00576712	0.0465476	-0.177327	-0.288067	-0.266036	0.00304364
NDUFA2	blue	0.200773	-0.494456	-0.744317	-0.153965	-0.506206	0.0930788	-0.103511	0.10947	-0.170685	-0.365611	-0.380411	-0.20437	-0.276698	-0.174304	-0.610045	-0.336689	-0.385194	0.0670801	0.439374	0.531505	0.553939	0.895266	0.759915	0.219781	0.105208	0.0540658	0.355545	0.746109	0.298898	-0.0675618	0.164187	-0.0722319	0.20558	-0.167089	0.0411149	0.00740822	0.000336325	-0.190681	-0.169112	-0.07868	-0.0403663
GPS2	blue	0.194061	-0.0420858	-0.573792	0.0776001	-0.10472	0.516574	0.306159	0.252649	0.143334	-0.221559	-0.288367	-0.223449	-0.498041	-0.112053	-0.506605	-0.0947358	-0.344049	0.13831	0.568687	0.700452	0.19958	0.626406	0.439713	0.062377	0.0796518	-0.0111977	0.274335	0.613378	0.303139	-0.376708	0.156725	-0.0378621	-0.0286644	-0.158364	-0.423005	-0.112326	-0.401124	-0.390364	-0.529255	0.0369421	0.0206954
PEMT	blue	0.077196	-0.405491	-0.59517	-0.153277	-0.470419	0.0620512	-0.0594044	-0.0298393	-0.253358	-0.36591	-0.370165	-0.160194	-0.0652779	-0.212139	-0.440574	-0.229368	-0.199891	0.0634341	0.385144	0.490555	0.524816	0.683007	0.527145	0.066863	-0.0717315	0.0856628	0.239269	0.461039	0.211906	0.269359	-0.139789	-0.258451	0.11646	-0.329535	-0.0678575	0.278123	0.175087	-0.117457	-0.299408	-0.232732	0.148107
COX16	blue	0.181366	-0.635812	-0.68877	-0.0167177	-0.451333	-0.013737	-0.16321	0.11578	-0.0519904	-0.510466	-0.355854	-0.0525812	-0.0149533	-0.14338	-0.371359	-0.0564654	-0.0704125	0.0215101	0.293737	0.416238	0.409339	0.718597	0.690523	0.188875	0.251466	0.212272	0.54206	0.690754	0.466242	0.0903058	0.0891768	-0.1503	-0.0155535	-0.364993	0.0071246	-0.0128035	-0.04404	-0.182403	-0.17995	-0.14073	-0.0118216
LAMTOR5	blue	0.0459253	-0.497644	-0.627117	-0.0825688	-0.433058	-0.0957159	-0.139917	-0.11934	-0.277874	-0.381054	-0.437827	-0.423998	-0.422119	-0.0753712	-0.556762	-0.267302	-0.358865	-0.0904828	0.199056	0.309379	0.552276	0.752557	0.761174	0.128299	-0.0166186	-0.0485095	0.21814	0.695704	0.28492	-0.20692	0.262362	0.099508	0.164576	-0.102582	0.0423259	0.185446	0.0124692	0.115862	0.00689495	0.0997538	0.287267
TIMM10	blue	-0.0923264	-0.216049	-0.493216	0.0946206	-0.165768	0.319636	0.156313	0.259502	0.0877764	-0.304749	-0.335996	-0.186016	-0.361074	-0.160219	-0.45995	-0.112597	-0.297689	0.117052	0.453638	0.585894	0.284777	0.736942	0.555606	0.0450809	0.145479	0.127817	0.212376	0.710082	0.343509	-0.222548	0.119298	-0.170289	0.0463785	-0.155066	-0.139901	-0.131829	-0.278211	-0.263648	-0.208585	0.0658718	-0.078196
TMEM258	blue	-0.0514052	-0.143988	-0.488018	0.122901	-0.131201	0.44826	0.278626	0.415284	0.206665	-0.296986	-0.390525	-0.196662	-0.45579	-0.206779	-0.498398	-0.139759	-0.398552	0.0290099	0.421794	0.643381	0.224797	0.759258	0.597494	-0.0130206	0.0797262	0.040198	0.105439	0.725568	0.312097	-0.19126	0.157929	-0.1166	0.181903	-0.0665662	-0.187071	-0.202699	-0.429343	-0.227113	-0.322574	-0.0376961	0.0225374
CARS2	blue	0.291113	-0.401457	-0.743616	-0.347039	-0.542191	0.0588225	-0.214828	-0.0580684	-0.250696	-0.298714	-0.386535	-0.289108	-0.348689	-0.123191	-0.626506	-0.330465	-0.243271	0.138121	0.541567	0.470119	0.626794	0.701073	0.64711	0.195499	0.145248	-0.143671	0.449403	0.403375	0.0673426	-0.0356444	0.322565	0.196473	0.0162785	-0.150758	-0.136225	0.154638	0.0578341	-0.232677	-0.303106	-0.0142185	0.0496902
ATP5G2	blue	0.0471596	-0.243088	-0.590146	-0.0513627	-0.282921	0.282926	0.11401	0.110877	-0.0274006	-0.261524	-0.333588	-0.265369	-0.374171	0.0214631	-0.479747	-0.19218	-0.302925	-0.0122887	0.451666	0.611543	0.404459	0.762914	0.676496	0.137885	0.0133075	-0.105311	0.285277	0.647137	0.256226	-0.129412	0.102372	-0.0686034	-0.0145747	-0.224806	-0.318572	0.0603062	-0.197411	-0.327563	-0.3876	-0.0421523	0.026061
BLOC1S1	blue	0.352246	-0.408696	-0.775843	-0.246209	-0.531366	0.225504	-0.0775112	0.224763	-0.0915703	-0.341655	-0.35593	-0.156735	-0.261477	-0.0207149	-0.63032	-0.376224	-0.384382	0.187724	0.610644	0.643265	0.564853	0.884162	0.753964	0.204271	0.0344751	-0.0417558	0.416808	0.663351	0.209047	0.0347314	0.128127	-0.124428	0.0492064	-0.169104	-0.0373941	-0.0271981	-0.0820433	-0.347771	-0.32859	-0.0748476	-0.0924684
PRADC1	blue	0.251485	-0.546488	-0.717216	-0.310309	-0.585614	-0.0133428	-0.292224	-0.055912	-0.187278	-0.565679	-0.551377	-0.310947	-0.234062	-0.150598	-0.557707	-0.212956	-0.0742091	0.165988	0.491187	0.443208	0.648144	0.777456	0.727929	0.205055	0.00576102	0.0416233	0.502966	0.520876	0.232518	0.187534	0.232619	-0.0418744	-0.0725791	-0.362217	0.025744	0.131533	0.157399	-0.165568	-0.1991	-0.271764	-0.01753
COX5B	blue	0.14024	-0.366111	-0.68755	-0.227107	-0.515791	0.130702	-0.0647586	0.0829602	-0.250778	-0.285861	-0.425427	-0.303706	-0.390517	-0.280529	-0.682218	-0.445111	-0.483661	0.124796	0.538772	0.554312	0.655303	0.904026	0.734761	0.0155223	-0.0560792	-0.0413713	0.15335	0.627118	0.128019	0.026986	0.220186	-0.000759405	0.257503	-0.0382127	0.0864226	0.12003	0.0714892	-0.0544629	-0.140912	-0.0695566	0.0933367
CCM2	blue	0.157888	-0.175641	-0.580015	-0.298295	-0.446142	0.274238	-0.0106269	0.235879	-0.137606	-0.203777	-0.406165	-0.243335	-0.423116	-0.458323	-0.677109	-0.473503	-0.499093	0.361099	0.700163	0.556628	0.53367	0.769591	0.590443	-0.0868807	0.113617	0.00980324	0.0117484	0.403981	-0.0598173	0.114172	0.30474	0.122706	0.512858	0.095374	0.14062	-0.0624928	-0.0427942	-0.100863	-0.154104	-0.0452202	0.000342067
HINT2	blue	0.319793	-0.488287	-0.699181	-0.258104	-0.581138	0.00721679	-0.192803	0.10706	-0.228544	-0.203978	-0.152794	0.0334111	0.0150035	-0.0955901	-0.510111	-0.420241	-0.376207	0.0804897	0.422152	0.44058	0.577787	0.788959	0.696826	0.293235	0.206761	-0.0523371	0.366205	0.589688	0.17002	0.148646	0.0197669	-0.0769693	0.170184	-0.0905918	0.235566	0.0306238	0.103728	-0.316126	-0.167626	-0.152374	-0.19057
UQCC2	blue	0.106301	-0.374015	-0.687176	-0.241929	-0.46279	0.0847233	-0.0982984	-0.041441	-0.267079	-0.428571	-0.589885	-0.44214	-0.510339	-0.255993	-0.714049	-0.372299	-0.383215	0.0492014	0.46368	0.487117	0.635695	0.82243	0.726961	0.143881	-0.0869349	-0.0783415	0.21479	0.557049	0.101592	0.0357577	0.284286	0.0817206	0.157078	-0.0845694	-0.0161323	0.135438	0.0217914	-0.0841677	-0.187169	0.0114341	0.130232
COX17	blue	0.0361795	-0.261976	-0.603517	0.114404	-0.20779	0.289763	0.188825	0.163302	-0.024337	-0.302838	-0.446464	-0.357369	-0.573482	-0.157625	-0.559691	-0.192539	-0.447169	-0.0949956	0.401833	0.601306	0.42287	0.825932	0.711022	-0.00766991	-0.0505464	-0.0435793	0.141967	0.775097	0.311876	-0.248875	0.233213	0.012244	-0.00325326	-0.0894969	-0.176768	0.0199799	-0.298901	-0.153413	-0.243307	0.0913793	0.158951
NABP2	blue	0.135424	0.0530759	-0.470424	0.0433767	-0.0846408	0.517507	0.356194	0.264224	0.0551017	-0.248787	-0.441552	-0.292813	-0.517573	-0.267991	-0.573944	-0.225181	-0.474797	0.13693	0.645162	0.729543	0.305878	0.745435	0.504765	-0.0347114	-0.117725	-0.0321867	0.0434374	0.602523	0.162603	-0.231103	0.163269	-0.0977223	0.0349816	-0.0223138	-0.184255	-0.0920263	-0.315824	-0.326334	-0.404759	0.0237967	-0.0357265
C12orf10	blue	0.151195	-0.337839	-0.689933	0.0292835	-0.29816	0.45028	0.185666	0.460899	0.164106	-0.314601	-0.272634	0.0715654	-0.178291	-0.254119	-0.469232	-0.149722	-0.303544	0.0349256	0.530927	0.7518	0.269027	0.806742	0.550487	0.10187	0.178285	0.152703	0.353482	0.710324	0.369759	-0.028424	-0.00705382	-0.265642	0.201453	-0.195828	-0.0965731	-0.263592	-0.331282	-0.429444	-0.391848	-0.280832	-0.240086
SERF2	blue	0.207178	-0.493775	-0.8372	-0.253397	-0.577638	0.119506	-0.153316	0.00103821	-0.221355	-0.540533	-0.628071	-0.442894	-0.478364	-0.202922	-0.745402	-0.321713	-0.304028	0.183366	0.617788	0.598775	0.704737	0.916833	0.830082	0.125061	0.0550449	0.0411764	0.397912	0.632372	0.217144	0.0064713	0.274653	-0.00993806	0.0422999	-0.268761	-0.102972	0.171841	0.0376221	-0.162314	-0.287031	-0.0337737	0.130753
NDUFB10	blue	0.239882	-0.359741	-0.727978	-0.0763626	-0.418441	0.264863	0.0702294	0.220947	-0.0929806	-0.272741	-0.315868	-0.148037	-0.313914	-0.185079	-0.615024	-0.341243	-0.507031	0.0654467	0.513098	0.641847	0.487754	0.905465	0.728102	0.161496	0.0619298	0.00361205	0.26091	0.791173	0.309126	-0.104036	0.111431	-0.087135	0.217474	-0.139141	0.0297198	-0.0727119	-0.140438	-0.261912	-0.273796	-0.116927	-0.0501158
ANAPC11	blue	0.292	-0.396254	-0.707133	-0.407648	-0.632533	0.0224547	-0.205127	-0.0617161	-0.381259	-0.282966	-0.479019	-0.417221	-0.41212	-0.0486336	-0.67995	-0.517368	-0.446521	0.164303	0.573613	0.502934	0.77884	0.877495	0.801727	0.0807469	-0.202249	-0.209461	0.202133	0.502754	-0.0100237	0.0669901	0.250242	0.0985642	0.153093	-0.105154	-0.0185526	0.276093	0.147603	-0.0641748	-0.149681	0.0278648	0.175948
MIEN1	blue	0.110742	-0.414183	-0.783151	-0.0164618	-0.363101	0.33515	0.0239138	0.195364	0.102851	-0.577148	-0.564979	-0.314522	-0.438027	-0.208522	-0.581605	-0.0343779	-0.148067	0.20757	0.583711	0.682651	0.335796	0.768548	0.582798	0.0953674	0.0445672	0.319805	0.514712	0.688253	0.452881	-0.230716	0.142671	-0.155795	-0.062832	-0.437698	-0.352273	-0.0585562	-0.228299	-0.2235	-0.331947	-0.0767856	0.0369506
TXNL4A	blue	0.029291	-0.340833	-0.694267	0.0718243	-0.29877	0.358977	0.135288	0.331207	0.0464415	-0.428654	-0.433676	-0.117018	-0.329223	-0.391671	-0.604699	-0.177547	-0.391639	0.17659	0.582367	0.699769	0.378214	0.869341	0.624303	-0.0396452	0.163281	0.289128	0.240333	0.767201	0.391003	-0.0411557	0.0394854	-0.264357	0.146787	-0.196111	-0.0249761	-0.182565	-0.252953	-0.232434	-0.218228	-0.0518718	-0.064434
hsa-mir-1199	blue	0.200418	-0.229385	-0.599458	-0.296335	-0.453411	0.184552	-0.0153702	0.0375515	-0.213342	-0.105341	-0.323383	-0.361393	-0.525692	-0.149113	-0.566626	-0.429952	-0.452933	0.0216115	0.437473	0.487883	0.533805	0.697825	0.649992	0.134601	-0.121777	-0.291051	0.117557	0.427726	-0.0259002	-0.123405	0.324003	0.24481	0.328943	0.0012759	-0.219645	0.220029	-0.0495704	-0.106922	-0.316429	-0.0434351	0.281607
SAMD1	blue	0.256179	-0.267308	-0.735062	-0.325219	-0.477402	0.259849	-0.0808164	0.0925361	-0.112436	-0.384121	-0.492014	-0.360696	-0.481335	-0.151553	-0.693377	-0.336597	-0.288136	0.347775	0.730692	0.6002	0.538454	0.720241	0.630098	0.104934	0.16468	-0.0367397	0.375716	0.413358	0.0537523	-0.0750953	0.322404	0.10993	0.120849	-0.142629	-0.212028	0.0924971	-0.0683066	-0.305052	-0.409583	0.0124527	0.0489018
TPGS1	blue	0.166044	-0.150749	-0.564915	-0.181746	-0.376407	0.341885	0.0574598	0.302451	-0.0258079	-0.233358	-0.386196	-0.219487	-0.411122	-0.306331	-0.619085	-0.361591	-0.460431	0.341424	0.690589	0.607463	0.440559	0.729218	0.513943	-0.135207	-0.0623763	0.0707078	0.0674003	0.456075	0.0585876	-0.0906315	0.167387	-0.0670372	0.167258	-0.0360108	-0.0175902	-0.0125914	-0.1377	-0.156359	-0.30584	-0.128497	0.07546
MVB12A	blue	0.33376	-0.389426	-0.698284	-0.354348	-0.570962	0.120798	-0.165911	0.0774622	-0.201035	-0.408438	-0.523165	-0.296452	-0.337453	-0.0627731	-0.64955	-0.417463	-0.336399	0.158308	0.574968	0.535116	0.63968	0.803904	0.70478	0.113666	-0.0936678	-0.0891404	0.289119	0.448518	0.0291557	0.0889347	0.15805	-0.0629218	0.0192282	-0.157368	0.0209766	0.109996	0.0305739	-0.144078	-0.185513	-0.0636383	0.0395487
NOSIP	blue	0.181469	-0.286828	-0.688189	-0.167068	-0.359397	0.375205	0.0668645	0.307956	0.0708109	-0.354805	-0.479997	-0.236779	-0.477623	-0.105343	-0.574173	-0.260029	-0.33581	0.10067	0.630084	0.691439	0.475238	0.867127	0.743914	-0.0262724	0.0292597	-0.106608	0.296466	0.64906	0.185492	-0.0425399	0.300586	0.0259831	0.132905	-0.119	-0.156689	-0.141361	-0.288342	-0.311027	-0.342993	-0.167917	-0.0717666
PFDN2	blue	0.0994721	-0.361618	-0.672489	0.103394	-0.234907	0.417346	0.174079	0.357782	0.201349	-0.456802	-0.403764	-0.120242	-0.333851	-0.167466	-0.433665	-0.0105132	-0.211775	-0.0129245	0.450819	0.694461	0.235028	0.764089	0.635488	0.086398	0.115945	0.141102	0.413716	0.771173	0.490355	-0.0877857	0.172832	-0.186044	0.0216109	-0.287349	-0.257674	-0.26	-0.422309	-0.268007	-0.36875	-0.151853	0.0238295
MRPL24	blue	0.0877904	-0.307563	-0.700529	0.142887	-0.210192	0.421349	0.264968	0.280282	0.11048	-0.372899	-0.329423	-0.100652	-0.266068	-0.0989101	-0.449287	-0.0438573	-0.281524	-0.0790034	0.418923	0.754156	0.269829	0.808994	0.657264	0.237211	0.0907203	0.110984	0.405494	0.836825	0.512334	-0.145165	-0.0535064	-0.311658	-0.0387877	-0.402123	-0.376091	-0.0973947	-0.341701	-0.453353	-0.53593	-0.157162	-0.0615836
GUK1	blue	0.248727	-0.459612	-0.687798	-0.439386	-0.672312	0.0295455	-0.292282	0.0855908	-0.248332	-0.389693	-0.475033	-0.250506	-0.242554	-0.272176	-0.620972	-0.429945	-0.292657	0.380894	0.639389	0.45074	0.688003	0.794481	0.721136	0.00196756	0.0345536	0.0518128	0.261704	0.405616	0.030529	0.311018	0.238658	0.0248877	0.316656	-0.151668	0.201435	0.0788551	0.170229	-0.00953386	-0.0878351	-0.172002	0.0826229
SNRPG	blue	0.0998005	-0.378826	-0.594885	-0.269694	-0.54614	-0.132635	-0.237857	-0.149481	-0.378159	-0.360225	-0.479735	-0.500798	-0.443992	-0.0906017	-0.678684	-0.43692	-0.410409	0.179254	0.322152	0.280081	0.634853	0.703038	0.693617	0.159268	-0.171493	-0.0402444	0.139137	0.511959	0.0919638	-0.118867	0.160485	0.00743931	0.10963	-0.0875307	-0.00102166	0.362288	0.190542	0.136485	-0.0170141	0.172735	0.34396
NDUFS6	blue	0.0523283	-0.167727	-0.589022	-0.0745593	-0.320074	0.285307	0.129889	0.237913	-0.131716	-0.183773	-0.341566	-0.236807	-0.44009	-0.286283	-0.684264	-0.422347	-0.633969	0.177164	0.567222	0.610598	0.509938	0.874829	0.664339	-0.0349027	-0.0609579	-0.0279692	-0.0120554	0.695465	0.148535	-0.135024	0.122163	-0.0719828	0.215552	0.0467019	0.0759725	-0.0420137	-0.164551	-0.121397	-0.136338	0.0515175	0.0390437
NHP2	blue	-0.0431615	0.0260581	-0.377969	0.0538613	-0.0856691	0.326287	0.274726	0.162396	-0.110337	-0.0315514	-0.21434	-0.183663	-0.399667	-0.171159	-0.495679	-0.287089	-0.570183	0.0336531	0.450205	0.564631	0.384195	0.72655	0.518046	-0.0667473	-0.095861	-0.121843	-0.102845	0.622678	0.142776	-0.196211	0.0136369	-0.117497	0.0780398	0.0206142	-0.051844	-0.014202	-0.185623	-0.229759	-0.211014	0.094366	-0.0198265
HIGD2A	blue	0.278431	-0.495371	-0.78741	-0.367218	-0.657823	-0.0587425	-0.269961	-0.15248	-0.409951	-0.383594	-0.518106	-0.451334	-0.413695	-0.143092	-0.747522	-0.470366	-0.400448	0.116578	0.50321	0.449021	0.78144	0.864566	0.808147	0.219612	-0.0442492	-0.131006	0.325492	0.557239	0.0920519	-0.000963227	0.298944	0.16	0.144601	-0.130179	0.00936357	0.280922	0.184481	-0.0586011	-0.147985	0.0589291	0.181811
WASH2P	blue	0.12753	-0.227182	-0.626181	-0.226584	-0.410852	0.314335	0.013433	0.328437	-0.0373895	-0.0769053	-0.128502	0.0252347	-0.222932	-0.358823	-0.54458	-0.39398	-0.424995	0.326377	0.670777	0.59431	0.410991	0.709697	0.465685	-0.0541052	0.235708	0.0566571	0.194442	0.426386	0.0272071	0.00688941	0.120405	-0.0020898	0.380802	0.0564912	0.0198602	-0.102531	-0.111538	-0.342646	-0.301574	-0.112919	-0.17373
NDUFB11	blue	0.0636436	-0.199336	-0.57393	-0.08299	-0.328294	0.23325	0.141235	0.115078	-0.203998	-0.128498	-0.337427	-0.32113	-0.500311	-0.198102	-0.631948	-0.419842	-0.597652	-0.0166996	0.446984	0.568624	0.55363	0.849372	0.691622	-0.0739781	-0.0504413	-0.151259	-0.0177803	0.650905	0.102402	-0.158852	0.178496	0.0344847	0.29882	0.0374032	-0.037848	0.121789	-0.0960322	-0.0882714	-0.186067	0.0399934	0.157644
NDUFB9	blue	0.225211	-0.255711	-0.475616	-0.337606	-0.487436	-0.0127759	-0.152245	0.0739644	-0.295424	-0.0640156	-0.200088	-0.16058	-0.233222	-0.164972	-0.553301	-0.56677	-0.542296	0.131842	0.374375	0.289836	0.598243	0.706246	0.659588	0.0446746	-0.000731845	-0.258925	-0.0126244	0.433127	-0.0924927	0.217195	0.267028	0.137037	0.402589	0.239685	0.368526	0.0176025	0.119233	-0.0373473	-0.0109644	-0.0171712	-0.00544097
SURF2	blue	0.181569	-0.288172	-0.694053	-0.156398	-0.421436	0.350368	0.0441145	0.338765	0.000276542	-0.291215	-0.320976	-0.0607471	-0.231233	-0.322474	-0.627988	-0.330201	-0.418272	0.319961	0.699624	0.695388	0.437172	0.86292	0.616152	0.0443533	0.174484	0.112439	0.281988	0.662983	0.235708	0.0831553	0.120424	-0.0920457	0.24584	-0.0819946	0.055469	-0.230097	-0.181905	-0.319811	-0.286238	-0.112115	-0.161447
C9orf142	blue	0.1876	-0.437383	-0.810042	-0.156257	-0.457902	0.270148	-0.0325649	0.186808	-0.0561503	-0.409056	-0.488643	-0.254038	-0.423452	-0.30715	-0.626131	-0.243118	-0.298973	0.105883	0.61283	0.656575	0.501928	0.817843	0.66147	0.11268	0.0924381	0.0870233	0.378084	0.571936	0.225285	-0.0703387	0.274764	-0.00300281	0.1396	-0.16195	-0.14117	-0.0208995	-0.165395	-0.251667	-0.342004	-0.106301	0.0174215
LAMTOR1	blue	0.154829	-0.494971	-0.680411	-0.289767	-0.557121	0.069433	-0.220576	0.100725	-0.11468	-0.534378	-0.479627	-0.150957	-0.0813267	-0.0814312	-0.520843	-0.237502	-0.120147	0.280331	0.557595	0.510488	0.565312	0.786074	0.726704	0.135079	0.208026	0.128707	0.438875	0.538061	0.244749	0.257026	0.0146868	-0.211463	0.115654	-0.375047	0.0309678	0.0320281	0.078584	-0.252549	-0.235024	-0.203954	-0.075479
TRPT1	blue	0.294982	-0.356669	-0.719565	-0.259017	-0.525162	0.160422	-0.0624414	0.143192	-0.218076	-0.237205	-0.266416	-0.0840711	-0.166154	-0.216657	-0.644765	-0.456814	-0.447379	0.195374	0.537378	0.55157	0.536727	0.779282	0.573324	0.199938	0.090599	0.0587062	0.260789	0.528367	0.112354	0.0713802	-0.0379078	-0.155296	0.301662	-0.0634284	0.108735	0.0306681	0.07478	-0.291542	-0.221265	-0.0612765	-0.14402
PPP4C	blue	0.217152	-0.355666	-0.73657	-0.149129	-0.455137	0.215264	0.0272725	0.00115057	-0.223844	-0.416849	-0.524686	-0.407745	-0.40591	-0.0939047	-0.611834	-0.253792	-0.32642	0.0695482	0.579738	0.690547	0.592611	0.842677	0.698703	0.0328111	-0.24747	-0.0327949	0.318976	0.61249	0.245585	-0.107415	0.106492	-0.142355	-0.0857926	-0.298966	-0.3238	0.279029	-0.0597282	-0.109883	-0.359809	0.0376071	0.331493
TIMM8B	blue	0.0666764	-0.332892	-0.584877	-0.0977772	-0.386435	0.100624	-0.0119793	0.0989696	-0.199793	-0.278532	-0.327942	-0.162218	-0.238508	-0.155883	-0.572022	-0.355837	-0.440198	0.011102	0.366387	0.477661	0.54972	0.828535	0.696564	0.116408	0.035612	-0.0130933	0.153722	0.678921	0.215345	0.0905476	-0.0130514	-0.220114	0.0818588	-0.121005	0.110164	0.0632946	0.0471727	-0.210699	-0.181193	-0.117027	-0.0645676
MZT2B	blue	0.186112	-0.42868	-0.684955	-0.366439	-0.608941	-0.0207899	-0.216599	-0.0629743	-0.380246	-0.263765	-0.450133	-0.386208	-0.394086	-0.148769	-0.663272	-0.48834	-0.433135	0.0523823	0.509583	0.44917	0.771464	0.856609	0.850606	0.0555338	-0.0269363	-0.243232	0.171822	0.485574	-0.0166404	0.0903676	0.388382	0.212611	0.234873	0.0106608	0.0836824	0.220434	0.0832607	0.0190709	-0.083793	0.0162618	0.227339
C14orf2	blue	0.0352826	-0.504338	-0.649139	0.0591282	-0.36986	0.0511662	-0.0384821	0.132202	-0.0984768	-0.301147	-0.223702	-0.0856365	-0.191544	-0.183611	-0.437074	-0.189408	-0.343087	-0.0332521	0.216741	0.409809	0.347543	0.747907	0.65457	0.13931	0.153883	0.245052	0.304558	0.765941	0.428024	-0.0790133	0.0247489	-0.184776	0.183536	-0.226321	0.00579921	-0.0518206	-0.0708388	-0.0892992	-0.0849423	-0.0130084	0.0236671
ATP5G1	blue	-0.074852	-0.252313	-0.583253	0.141741	-0.190751	0.407742	0.265577	0.379808	0.117872	-0.252463	-0.245599	-0.0402701	-0.267079	-0.17777	-0.453329	-0.146415	-0.397411	0.000911992	0.3743	0.675439	0.220211	0.764288	0.472592	0.00145249	0.0302916	0.212985	0.208924	0.779854	0.414034	-0.187801	-0.141557	-0.329067	0.221891	-0.200155	-0.218728	-0.130693	-0.261876	-0.321705	-0.328811	-0.0473889	-0.102159
SNF8	blue	0.232843	-0.267417	-0.531383	-0.0547053	-0.277876	0.337945	0.0870738	0.357382	0.151674	-0.327571	-0.308221	-0.0120894	-0.168016	-0.0292733	-0.380391	-0.139216	-0.242581	0.107227	0.528544	0.608432	0.359964	0.759948	0.653884	0.00761294	0.196901	-0.0709274	0.300709	0.661934	0.300255	0.032586	0.0842126	-0.115035	0.0443717	-0.195328	0.00441757	-0.222586	-0.277686	-0.332246	-0.307266	-0.276875	-0.149478
PSMD4	blue	0.0651221	-0.197054	-0.550629	0.137317	-0.139618	0.347713	0.279966	0.229656	0.00951789	-0.23028	-0.295878	-0.164533	-0.376664	-0.0929973	-0.467963	-0.174623	-0.443612	-0.128858	0.36563	0.625966	0.318375	0.776895	0.7038	0.119865	0.178733	-0.0542767	0.153887	0.768436	0.332335	-0.16741	0.135106	-0.12029	0.108101	-0.120524	-0.170432	-0.119283	-0.356431	-0.274044	-0.291143	0.0698292	0.0163146
U2AF1	blue	0.260046	-0.372597	-0.696823	-0.0321957	-0.376429	0.324107	0.104012	0.317305	0.0786826	-0.402716	-0.339076	-0.103466	-0.195036	-0.00282424	-0.437215	-0.135983	-0.2638	0.140179	0.492624	0.675119	0.320405	0.744472	0.636487	0.0508011	-0.0044927	0.0771827	0.394331	0.709062	0.413597	-0.119348	-0.0394751	-0.287445	0.108064	-0.307663	-0.27154	-0.00959111	-0.28391	-0.2101	-0.404538	-0.0940557	0.20562
PMF1	blue	0.427822	-0.452869	-0.691616	-0.201513	-0.50464	0.158781	-0.0760172	0.153039	-0.0902592	-0.286831	-0.205531	0.0447526	0.0504258	0.0960199	-0.337754	-0.230118	-0.2024	0.0544648	0.460895	0.567947	0.465101	0.690517	0.577201	0.286768	-0.155408	-0.116308	0.473346	0.533744	0.252882	0.182206	-0.102597	-0.229426	-0.0838378	-0.302577	-0.109922	0.0939017	-0.0267371	-0.376745	-0.404576	-0.282042	-0.0496344
CCDC12	blue	0.172143	-0.183151	-0.654584	-0.0261908	-0.262416	0.454145	0.217786	0.309994	0.0666482	-0.21706	-0.303605	-0.142657	-0.396226	-0.0560327	-0.544703	-0.25787	-0.439027	0.0368436	0.576354	0.758755	0.359856	0.840922	0.6357	0.128909	-0.0154614	-0.0692755	0.271489	0.72572	0.264029	-0.202646	0.0595244	-0.137027	0.0167465	-0.14383	-0.276897	-0.0934295	-0.3304	-0.470167	-0.4593	-0.0357165	-0.111514
PPP1R35	blue	0.238828	-0.478884	-0.714758	-0.209099	-0.530858	0.0867504	-0.140373	0.0845899	-0.210386	-0.353583	-0.422625	-0.235012	-0.238347	-0.121752	-0.528752	-0.265442	-0.271439	0.11024	0.510839	0.545299	0.56769	0.77577	0.706465	0.0463183	-0.0149021	0.0448887	0.31527	0.506288	0.193943	0.0767403	0.105114	-0.0581088	0.10909	-0.22709	-0.0796011	0.0995162	-0.049413	-0.0753225	-0.216392	0.0181593	0.223805
VPS28	blue	0.158739	-0.162264	-0.645178	-0.256625	-0.404082	0.270775	0.0915811	0.0567692	-0.264649	-0.0652297	-0.243902	-0.247727	-0.379002	-0.0490065	-0.593383	-0.443394	-0.499147	0.0558002	0.590992	0.64601	0.595953	0.766399	0.628886	0.0556208	-0.120967	-0.297404	0.142894	0.455171	-0.0220595	-0.0741984	0.123151	0.00259347	0.105834	-0.0593082	-0.266727	0.244081	-0.0450587	-0.295886	-0.426539	-0.0133743	0.10964
JOSD2	blue	0.0805504	-0.229791	-0.671084	-0.0673691	-0.323514	0.492874	0.182274	0.420197	0.106447	-0.301516	-0.409145	-0.12518	-0.370443	-0.296106	-0.594224	-0.254444	-0.412767	0.158074	0.702547	0.800124	0.391794	0.852822	0.559061	-0.0542021	0.0598977	0.0753608	0.185721	0.624445	0.217465	-0.106667	0.102635	-0.141713	0.213017	-0.120535	-0.147048	-0.137045	-0.298714	-0.326319	-0.390396	-0.173454	-0.0868806
MED11	blue	0.0973553	-0.134586	-0.575122	-0.0719305	-0.232942	0.430537	0.168256	0.281048	0.101442	-0.376928	-0.493525	-0.230597	-0.464563	-0.234963	-0.615777	-0.219546	-0.321179	0.130505	0.586012	0.672342	0.359403	0.73421	0.487158	0.0316073	0.0118549	0.00923369	0.183858	0.555818	0.173508	-0.106096	0.089058	-0.127083	0.0485467	-0.0665513	-0.13486	-0.0921622	-0.24067	-0.326176	-0.345657	-0.104124	-0.122622
SNRNP25	blue	0.119814	-0.261833	-0.580959	-0.477224	-0.592675	0.0299664	-0.22078	0.0115907	-0.35457	-0.233037	-0.436074	-0.345187	-0.383194	-0.441799	-0.747043	-0.596236	-0.463687	0.352126	0.617061	0.388986	0.691367	0.740063	0.646287	0.0581601	0.0916938	-0.0795094	0.0487972	0.304034	-0.171192	0.205818	0.408542	0.234564	0.517971	0.152742	0.219756	0.137073	0.222472	0.00117764	-0.0750221	-0.0135947	0.0789618
FLYWCH2	blue	0.172368	-0.156802	-0.575407	0.0460116	-0.223819	0.419473	0.248482	0.278252	-0.0203384	-0.168059	-0.208122	0.0190024	-0.194822	-0.155538	-0.468909	-0.210027	-0.418458	-0.03658	0.519357	0.736569	0.357724	0.751832	0.422849	-0.00271143	-0.120076	-0.0124632	0.186648	0.628907	0.275286	-0.0329278	-0.180968	-0.341985	-0.0700678	-0.144349	-0.137877	-0.0377528	-0.179149	-0.382552	-0.402843	-0.140125	-0.111047
UBXN1	blue	0.158886	-0.129313	-0.623495	-0.0162473	-0.215502	0.407999	0.228995	0.188843	0.00411236	-0.304592	-0.463153	-0.375967	-0.584846	0.013076	-0.587517	-0.22625	-0.418987	0.0876853	0.579835	0.702151	0.392557	0.794138	0.717171	0.034171	-0.0612317	-0.0918258	0.198973	0.667542	0.219151	-0.303411	0.189749	-0.0806851	-0.0182117	-0.186012	-0.373487	0.0207779	-0.340249	-0.277279	-0.393862	0.0876249	0.1209
C11orf48	blue	0.206039	-0.41545	-0.72965	-0.0338906	-0.384699	0.173641	0.0375562	0.111039	-0.108626	-0.371488	-0.409638	-0.228926	-0.344278	-0.184264	-0.557328	-0.232442	-0.354497	-0.0535435	0.419738	0.577085	0.488515	0.834334	0.780877	0.224505	0.119174	-0.0292502	0.326953	0.724913	0.310923	-0.107539	0.179475	-0.0517218	0.0621992	-0.175184	-0.112834	0.0491963	-0.174602	-0.286032	-0.337544	-0.064126	0.0348578
C1orf86	blue	0.178809	-0.365549	-0.609585	-0.329593	-0.54526	0.0383518	-0.190271	0.0302154	-0.277195	-0.346316	-0.513588	-0.339055	-0.349926	-0.357572	-0.667678	-0.446298	-0.361049	0.18899	0.564692	0.430494	0.641783	0.745611	0.599175	-0.042827	-0.0170358	0.0370559	0.12461	0.355013	-0.0420156	0.107546	0.324792	0.0680273	0.234904	0.0293081	0.192535	0.12109	0.125403	0.000224782	-0.021083	-0.0121339	0.0477631
MRPL55	blue	0.173622	-0.223723	-0.607794	0.136963	-0.203816	0.449682	0.307187	0.368046	0.0647061	-0.133689	-0.140764	0.0447828	-0.16907	-0.115204	-0.416614	-0.173953	-0.463843	-0.00412566	0.470108	0.753767	0.265455	0.796628	0.514995	0.104806	-0.0053891	0.0950765	0.208727	0.782033	0.401648	-0.155161	-0.222776	-0.33989	0.0984442	-0.23815	-0.181819	-0.141021	-0.303883	-0.414025	-0.436545	-0.0981627	-0.0923249
SCNM1	blue	0.1815	-0.361116	-0.681082	-0.0249973	-0.310619	0.344676	0.0777162	0.306864	0.126718	-0.458178	-0.438305	-0.133972	-0.32785	-0.132724	-0.499376	-0.127449	-0.230727	0.0792787	0.531446	0.665938	0.393026	0.832424	0.70136	0.0523919	0.0961095	0.0695269	0.399141	0.719781	0.359096	-0.00944862	0.103865	-0.217993	-0.0406238	-0.244191	-0.140738	-0.129736	-0.259921	-0.372352	-0.393995	-0.162929	-0.0899926
VPS72	blue	0.171877	-0.183292	-0.605574	-0.0979047	-0.251292	0.446266	0.158323	0.227918	0.128041	-0.430981	-0.510599	-0.285708	-0.464558	-0.0457492	-0.507166	-0.125734	-0.214413	0.0616145	0.587507	0.71834	0.344682	0.734915	0.552637	0.0654489	-0.178632	-0.127087	0.345592	0.591135	0.252068	-0.143782	0.197682	-0.0642536	-0.057232	-0.192051	-0.360513	-0.059291	-0.304332	-0.324561	-0.459614	-0.170509	0.0143848
KRTCAP2	blue	0.231918	-0.505476	-0.888109	-0.0943549	-0.510537	0.235885	-0.00589469	0.118933	-0.10251	-0.479515	-0.467134	-0.257587	-0.341466	-0.0948395	-0.642791	-0.228229	-0.298648	0.028582	0.500039	0.694364	0.521745	0.862689	0.711268	0.211075	0.0179653	0.113094	0.493764	0.718193	0.37531	-0.0974505	0.00889064	-0.222307	-0.019219	-0.382986	-0.299562	0.156789	-0.0805537	-0.291291	-0.43526	-0.0648135	0.110128
TEX264	blue	0.147746	-0.20021	-0.624714	-0.145355	-0.350311	0.468895	0.141318	0.419519	0.135178	-0.301355	-0.350343	-0.0268543	-0.242407	-0.3007	-0.553366	-0.248962	-0.312139	0.21272	0.641572	0.730923	0.325652	0.751464	0.421468	0.028328	-0.0282277	0.0814212	0.281873	0.560841	0.20327	0.017774	0.0281115	-0.180578	0.188826	-0.111821	-0.0813662	-0.187731	-0.189271	-0.363645	-0.381441	-0.301872	-0.232654
NDUFAF2	blue	0.127205	-0.388149	-0.654244	0.164098	-0.226546	0.246847	0.154439	0.1537	0.0101625	-0.414439	-0.413536	-0.241489	-0.39499	-0.114197	-0.440132	-0.0574206	-0.31657	-0.100396	0.323218	0.560236	0.293792	0.737333	0.66134	0.0797051	0.0518927	0.0972141	0.293191	0.794198	0.478171	-0.209191	0.131722	-0.11385	0.0838309	-0.251678	-0.208597	-0.0785162	-0.327542	-0.149589	-0.254286	0.0111907	0.148948
UQCRQ	blue	0.0715634	-0.295895	-0.639639	-0.154522	-0.429059	0.15098	-0.00135533	0.108263	-0.217163	-0.237476	-0.370021	-0.285112	-0.43023	-0.269151	-0.700414	-0.458939	-0.570988	0.0993781	0.472191	0.518052	0.587087	0.888029	0.729653	0.0413998	0.00789372	-0.0449942	0.0909136	0.692645	0.143483	-0.0691757	0.195232	-0.00611204	0.274025	0.0352348	0.115789	0.050214	-0.00132508	-0.08955	-0.116081	0.0244042	0.0499725
TMUB1	blue	0.20707	-0.20209	-0.689762	-0.187826	-0.398801	0.347263	0.105067	0.131306	-0.1447	-0.239691	-0.431887	-0.345913	-0.536946	-0.235466	-0.649794	-0.349983	-0.455138	0.132564	0.664935	0.690057	0.551752	0.785589	0.618905	-0.0265786	-0.107872	-0.133859	0.151282	0.483142	0.0582086	-0.109367	0.237627	0.0238413	0.115186	-0.0779998	-0.257773	0.183259	-0.132599	-0.220987	-0.471957	-0.0510095	0.225255
C7orf55	blue	0.278517	-0.456311	-0.792705	-0.286853	-0.560194	0.202119	-0.137518	0.182282	-0.0621943	-0.460478	-0.477565	-0.226853	-0.294115	-0.0879529	-0.617199	-0.307171	-0.248226	0.223149	0.611073	0.621569	0.551985	0.841103	0.699499	0.205495	0.0469386	0.048729	0.464267	0.590522	0.220174	0.00855377	0.113106	-0.124027	0.118082	-0.241652	-0.125484	0.0782324	-0.0200394	-0.295253	-0.341167	-0.118575	-0.0344683
COX6C	blue	0.0535746	-0.532422	-0.659031	0.0948358	-0.372323	0.0851462	-0.0183592	0.20729	-0.0434873	-0.369585	-0.235069	-0.010277	-0.113947	-0.200401	-0.427934	-0.157802	-0.306716	-0.0269202	0.228253	0.448138	0.346719	0.758387	0.621892	0.109077	0.151283	0.275937	0.341099	0.806217	0.494949	-0.00737043	-0.0506474	-0.30438	0.160031	-0.234831	0.0639541	-0.0613932	-0.0599206	-0.105019	-0.0810007	-0.0842716	-0.015069
PACSIN3	blue	0.302475	-0.0350548	-0.45661	-0.259998	-0.361427	0.371745	0.116393	0.420192	-0.061406	0.0133122	-0.13865	0.0214067	-0.204864	-0.209493	-0.575447	-0.548775	-0.59935	0.297211	0.640916	0.585576	0.438112	0.69462	0.437083	-0.0670831	0.114629	-0.0697126	-0.0614251	0.371084	-0.122069	0.13782	-0.0190673	-0.129551	0.37499	0.131388	0.182497	-0.107642	-0.0561841	-0.366491	-0.302818	-0.10513	-0.206953
PSMC3	blue	0.120306	-0.276851	-0.598904	0.186049	-0.160467	0.375876	0.263379	0.249792	0.08157	-0.422739	-0.407564	-0.101787	-0.235645	-0.221366	-0.403843	-0.00413231	-0.245725	-0.0549597	0.446943	0.693228	0.301462	0.779268	0.684025	0.0825393	0.153204	0.112889	0.300534	0.772577	0.47159	0.0050818	0.0441229	-0.278033	-0.0786375	-0.340557	-0.175993	-0.132169	-0.330838	-0.29871	-0.375774	-0.143691	0.00219318
NDUFB8	blue	0.0976988	-0.421264	-0.701588	-0.0602283	-0.413836	0.195048	0.00650416	0.131376	-0.104635	-0.398052	-0.460258	-0.272208	-0.375622	-0.35653	-0.586632	-0.239495	-0.358206	0.0236214	0.472541	0.573768	0.495599	0.857016	0.759525	0.10098	0.105959	0.0606887	0.26257	0.703767	0.301993	0.0335263	0.333659	0.0309023	0.228063	-0.116702	0.00686465	-0.0847742	-0.155704	-0.048142	-0.134028	-0.0690345	0.0942513
TAF10	blue	0.132718	-0.45021	-0.773863	-0.335377	-0.626343	0.138937	-0.175394	0.130147	-0.211174	-0.470874	-0.539537	-0.289402	-0.309837	-0.355454	-0.736911	-0.392115	-0.341208	0.363179	0.684255	0.590821	0.652164	0.867143	0.762233	0.125489	0.143867	0.143429	0.306212	0.525194	0.131978	0.215658	0.195692	-0.0591155	0.274989	-0.212179	0.0238999	0.0672403	0.0451747	-0.115509	-0.253998	-0.0987685	0.120234
FAM96B	blue	0.112729	-0.349596	-0.740497	0.0158498	-0.312631	0.385225	0.14488	0.235986	0.066994	-0.496515	-0.512376	-0.255508	-0.406917	-0.086721	-0.566741	-0.101403	-0.256823	0.0737406	0.562817	0.769082	0.418802	0.896397	0.732227	0.0751882	0.0238511	0.113074	0.417503	0.803273	0.438339	-0.0987874	0.0425694	-0.262819	-0.0854466	-0.407149	-0.34495	-0.0346859	-0.264266	-0.345076	-0.457015	-0.126607	0.0271137
TSC22D4	blue	0.351794	-0.488026	-0.663181	-0.465402	-0.689585	-0.0239318	-0.329003	0.0228664	-0.239694	-0.33073	-0.28817	-0.121053	-0.0125246	0.0538649	-0.443014	-0.357449	-0.136161	0.300964	0.549629	0.421434	0.663594	0.650737	0.537427	0.0717622	-0.0321882	-0.0528131	0.410022	0.308087	0.0520997	0.192478	-0.054113	-0.14788	0.0840733	-0.265257	0.00691894	0.3537	0.321763	-0.17508	-0.269196	-0.238127	0.0624312
VKORC1	blue	0.0962553	-0.140311	-0.561372	0.194365	-0.0925302	0.507225	0.385098	0.265574	0.135849	-0.398162	-0.464568	-0.265128	-0.465091	-0.0844876	-0.430183	-0.000777163	-0.286144	-0.0353224	0.462614	0.760424	0.245829	0.721335	0.557727	-0.12693	-0.151197	0.0870144	0.203146	0.709151	0.414014	-0.220691	-0.0403165	-0.354589	-0.0971725	-0.376988	-0.449066	0.0198393	-0.382539	-0.27392	-0.522559	-0.0828104	0.191101
GPX4	blue	0.237342	-0.307635	-0.656137	-0.276336	-0.519439	0.168202	-0.0683018	0.13898	-0.240399	-0.240005	-0.401084	-0.266773	-0.341547	-0.214817	-0.695199	-0.495879	-0.532705	0.230232	0.616817	0.569106	0.634219	0.887854	0.725304	0.0974749	-0.0238094	-0.0624493	0.120554	0.576743	0.052401	0.0622034	0.206696	0.024148	0.256231	-0.0115402	0.152098	-0.000639643	-0.01066	-0.128324	-0.119643	0.000310935	0.00694683
CDK2AP2	blue	0.0431089	-0.153039	-0.604408	-0.252126	-0.383076	0.241722	0.00933039	-0.00335605	-0.208973	-0.355564	-0.604609	-0.553391	-0.691472	-0.330795	-0.754773	-0.353564	-0.403229	0.195878	0.625262	0.559167	0.575839	0.707742	0.540454	-0.0972526	-0.162521	-0.0855913	0.0800971	0.394518	-0.000770001	-0.190182	0.368797	0.137858	0.135858	-0.0398099	-0.209035	0.235764	-0.0336566	-0.0145763	-0.283708	0.0446453	0.296401
NUDT8	blue	0.304356	-0.351006	-0.628554	-0.291471	-0.555253	-0.00326363	-0.143457	-0.0362765	-0.385383	-0.0865004	-0.232343	-0.23284	-0.28397	-0.0904592	-0.592848	-0.514139	-0.499775	0.0309853	0.385805	0.408457	0.665062	0.723613	0.598529	0.0464957	-0.202801	-0.194732	0.105921	0.433153	-0.0149906	0.00153092	0.0413476	0.0149286	0.188013	0.0209675	-0.00911442	0.307903	0.164142	-0.0393423	-0.106171	0.0626491	0.183803
ICT1	blue	0.191489	-0.396903	-0.674546	-0.202492	-0.47407	0.166991	-0.0656179	0.172486	-0.102964	-0.261546	-0.294798	-0.105966	-0.201367	-0.0918357	-0.537259	-0.32641	-0.346566	0.0709951	0.508298	0.54866	0.515523	0.79755	0.672008	0.132198	0.0602652	-0.1094	0.297085	0.616829	0.200385	0.0261218	0.147388	0.0273224	0.117277	-0.0905159	0.0783433	-0.0344204	-0.0847799	-0.197218	-0.23196	-0.222996	-0.0139487
SAC3D1	blue	0.136463	0.0113583	-0.542399	-0.016187	-0.167617	0.570578	0.323774	0.390206	0.0804037	-0.172304	-0.358608	-0.20896	-0.522335	-0.277825	-0.630875	-0.313588	-0.538052	0.213302	0.74147	0.796431	0.380578	0.802823	0.498894	-0.08661	-0.0183844	-0.0260501	0.0425527	0.583496	0.104501	-0.231777	0.152889	-0.110067	0.0555185	-0.0191297	-0.222559	-0.0741028	-0.29811	-0.392174	-0.453216	-0.0231492	-0.0837801
COPS6	blue	0.148001	-0.295901	-0.648425	0.0704509	-0.214321	0.317252	0.217699	0.123219	-0.0209958	-0.326452	-0.408573	-0.257631	-0.402689	-0.0254689	-0.469804	-0.132609	-0.332736	-0.233099	0.346299	0.642825	0.372412	0.782684	0.724273	0.248783	-0.0115457	-0.149364	0.293575	0.754467	0.357817	-0.143589	0.191993	-0.0267525	-0.00609207	-0.237127	-0.27713	-0.0566462	-0.310185	-0.278399	-0.394024	-0.0822725	0.0656851
NUDT16L1	blue	-0.0531581	-0.103782	-0.504584	-0.206636	-0.356333	0.321521	0.0587065	0.161379	-0.0952289	-0.315476	-0.452298	-0.288292	-0.350337	-0.309395	-0.615958	-0.325887	-0.33903	0.355493	0.675687	0.628144	0.478217	0.717289	0.418156	-0.110232	-0.136717	0.132127	0.08642	0.417251	0.0674098	0.105744	-0.00145989	-0.225206	0.0640625	-0.199232	-0.169746	0.140895	0.0768631	-0.231985	-0.334132	-0.125307	-0.0180564
DTYMK	blue	0.321808	-0.358784	-0.648892	-0.239161	-0.459182	0.0946063	-0.147248	0.0251743	-0.173059	-0.361874	-0.45263	-0.267719	-0.330615	-0.049921	-0.520256	-0.27852	-0.234471	0.126886	0.494895	0.477445	0.575608	0.700199	0.614505	0.0966703	-0.200994	-0.061377	0.332809	0.431987	0.0900724	0.0635057	0.138368	-0.0637213	-0.182254	-0.249629	-0.157444	0.163431	0.0244061	-0.28254	-0.2756	-0.0461694	-0.0321998
NDUFS5	blue	0.145241	-0.369287	-0.656817	0.0454357	-0.314665	0.177954	0.0920394	0.149104	-0.0979382	-0.214305	-0.230759	-0.177885	-0.36508	-0.100434	-0.494227	-0.254541	-0.463599	-0.093285	0.295135	0.515437	0.384879	0.78518	0.725028	0.17837	0.0536386	0.027663	0.238397	0.774778	0.348753	-0.231072	0.108738	-0.107949	0.111684	-0.142269	-0.123456	0.0254647	-0.186047	-0.161899	-0.248024	0.0449265	0.136038
TMEM208	blue	0.0749598	-0.336953	-0.688965	0.212167	-0.220381	0.445112	0.267695	0.368629	0.167542	-0.434391	-0.345672	-0.0321106	-0.188268	-0.215138	-0.447574	-0.0201865	-0.259635	0.0454138	0.467762	0.77727	0.236586	0.807034	0.530559	0.0817135	0.073085	0.327342	0.393387	0.847302	0.571243	-0.127199	-0.176808	-0.470913	-0.0365224	-0.387628	-0.264399	-0.0963204	-0.269426	-0.364638	-0.42409	-0.114924	-0.0635438
RNF181	blue	0.166338	-0.362829	-0.662159	0.0573367	-0.334611	0.188879	0.134991	0.112397	-0.150378	-0.247851	-0.213044	-0.142328	-0.206809	0.0717901	-0.453387	-0.228298	-0.429445	-0.0486774	0.316865	0.579892	0.420922	0.775615	0.68256	0.128651	-0.0247739	0.0382083	0.27115	0.779211	0.398279	-0.124106	-0.16943	-0.350791	0.00377426	-0.336075	-0.220451	0.169503	-0.105898	-0.230192	-0.345681	0.0372572	0.177068
ATP5I	blue	0.110385	-0.298521	-0.683268	-0.0119051	-0.337285	0.30981	0.149988	0.258474	-0.0660362	-0.258314	-0.294878	-0.134917	-0.346085	-0.251533	-0.613808	-0.337025	-0.517335	0.0452089	0.481092	0.644317	0.418437	0.861471	0.71065	0.185965	0.173403	0.0513299	0.182653	0.752801	0.28102	-0.0344545	0.113331	-0.167119	0.247519	-0.0699787	-0.0139009	-0.0967168	-0.191189	-0.295788	-0.309926	-0.0517609	-0.0475432
NSMCE1	blue	0.0790311	-0.350601	-0.707834	-0.110164	-0.42456	0.160058	0.0236386	0.0779884	-0.214174	-0.336128	-0.463881	-0.345526	-0.455377	-0.215858	-0.678004	-0.336955	-0.44084	0.00301719	0.43549	0.568382	0.567988	0.830421	0.732122	0.122081	-0.0203087	2.05e-05	0.202428	0.620961	0.164303	-0.0575074	0.157124	-0.0757479	0.0559852	-0.144563	-0.134432	0.174533	-0.0697959	-0.165332	-0.285188	0.0455776	0.140274
STRA13	blue	0.179542	-0.291096	-0.608332	-0.12138	-0.351196	0.233499	0.00532096	0.17363	-0.0607506	-0.439257	-0.599291	-0.361459	-0.490776	-0.299994	-0.61276	-0.262551	-0.306712	0.128275	0.556587	0.568899	0.484412	0.778274	0.653556	0.0138341	0.0144311	0.0670299	0.200658	0.523352	0.136595	-0.0775734	0.333976	-0.0314381	0.108808	-0.074722	-0.0730647	0.00697166	-0.135476	-0.115309	-0.136565	0.0367444	0.0415796
ASPSCR1	blue	0.130606	-0.223262	-0.691739	-0.0561657	-0.340481	0.500993	0.203906	0.442416	0.107765	-0.20451	-0.205736	0.0980163	-0.121595	-0.25184	-0.501264	-0.231402	-0.370682	0.183936	0.67452	0.827788	0.321304	0.815118	0.482225	0.0645417	0.115765	0.126425	0.314944	0.660292	0.308044	-0.00977492	-0.166753	-0.314994	0.172639	-0.216405	-0.162068	-0.128047	-0.212806	-0.525056	-0.540501	-0.285334	-0.22444
DCXR	blue	0.143629	-0.468778	-0.685861	-0.258932	-0.596137	-0.0172937	-0.187866	-0.126	-0.337783	-0.449109	-0.475722	-0.352447	-0.216894	-0.229746	-0.577856	-0.306133	-0.215913	0.188264	0.474089	0.455822	0.66699	0.74562	0.637099	0.177757	-0.0517404	0.101179	0.329415	0.488169	0.197457	0.176296	0.0853894	-0.152165	0.058378	-0.338392	-0.067112	0.375012	0.311781	-0.0383237	-0.200796	-0.142643	0.169423
HSPB2	blue	0.278298	-0.320413	-0.623412	-0.457927	-0.641905	-0.0533937	-0.242538	-0.0714725	-0.407476	-0.200362	-0.378782	-0.397114	-0.352973	-0.0874737	-0.704327	-0.598385	-0.475761	0.206206	0.466847	0.337592	0.748886	0.681706	0.595788	0.119494	-0.258832	-0.232021	0.0988915	0.327457	-0.143034	0.0156857	0.239798	0.112069	0.176647	0.0837144	0.0804227	0.391737	0.291898	0.076633	-0.036193	0.0162483	0.217433
GABARAP	blue	0.152158	-0.39499	-0.74124	-0.105118	-0.416808	0.16033	-0.0171961	-3.42e-05	-0.143956	-0.432864	-0.428046	-0.327581	-0.369567	0.0132187	-0.588756	-0.219334	-0.299402	0.0626342	0.447442	0.561494	0.501986	0.780578	0.712051	0.168181	0.0495448	0.00896145	0.400939	0.673841	0.322543	-0.175545	0.0929895	-0.143308	-0.0121556	-0.317024	-0.273687	0.167885	-0.0501633	-0.239577	-0.355136	-0.0145398	0.114738
WIBG	blue	0.114126	-0.349822	-0.607441	-0.0567547	-0.337379	0.242757	-0.0248764	0.289971	0.0704704	-0.390231	-0.272926	0.0846686	0.0191657	-0.190091	-0.408157	-0.112451	-0.144788	0.245101	0.584478	0.583927	0.353672	0.693678	0.504988	0.0187593	0.277155	0.210921	0.442887	0.578278	0.33683	0.118256	-0.0578481	-0.269221	-0.0449686	-0.233449	0.0345244	-0.154295	-0.10135	-0.393247	-0.298186	-0.142172	-0.249964
NDUFA3	blue	0.143887	-0.31107	-0.692036	-0.195799	-0.501139	0.212613	-0.0160124	0.189301	-0.20205	-0.304242	-0.421711	-0.252014	-0.358044	-0.389659	-0.741141	-0.46772	-0.528018	0.267065	0.584004	0.603529	0.550322	0.865732	0.632115	0.0948618	-0.00981317	0.185697	0.131353	0.586879	0.119797	0.0608113	0.068724	-0.187426	0.278635	-0.0787198	0.0144411	0.0441631	0.0249825	-0.132051	-0.168971	0.0511135	0.0235639
SCAND1	blue	0.240108	-0.373605	-0.765835	-0.066355	-0.439184	0.352923	0.0757329	0.274623	-0.0134724	-0.374156	-0.37621	-0.104029	-0.218455	-0.202283	-0.563225	-0.210272	-0.340004	0.171327	0.652704	0.775204	0.471854	0.872284	0.595824	0.0844921	-0.0895935	0.129511	0.387892	0.717769	0.377457	-0.0847488	-0.0598715	-0.297781	-0.0345847	-0.327526	-0.195069	0.0454906	-0.123054	-0.323171	-0.455358	-0.214216	0.0232319
MRPL36	blue	-0.0118287	-0.163844	-0.56257	0.0252356	-0.258212	0.262828	0.159184	0.172379	-0.11816	-0.167702	-0.30533	-0.278918	-0.51366	-0.254511	-0.645695	-0.336941	-0.59493	0.0181737	0.411153	0.548348	0.408602	0.749575	0.544338	-0.0029063	-0.138088	-0.018091	0.0326698	0.680746	0.205266	-0.325187	0.122015	-0.0275033	0.123401	0.0668557	-0.0623571	0.0438509	-0.192723	-0.0713548	-0.124087	0.161421	0.133866
ZNF524	blue	0.205949	-0.158667	-0.638823	-0.30154	-0.396039	0.353513	-0.00873499	0.229803	-0.0377567	-0.352086	-0.550979	-0.346909	-0.545585	-0.28873	-0.710076	-0.364108	-0.37871	0.334646	0.784047	0.647391	0.539037	0.784459	0.615176	0.0107628	-0.0112995	-0.0694272	0.196411	0.422892	-0.0115275	-0.0597535	0.392245	0.100577	0.12142	-0.0163472	-0.0672786	-0.0644271	-0.147016	-0.249042	-0.305159	-0.0435094	-0.0614728
TCEA2	blue	0.305849	-0.390777	-0.744016	-0.325611	-0.569225	0.221023	-0.0705348	0.127617	-0.186358	-0.212884	-0.280562	-0.136525	-0.206139	-0.0844573	-0.527498	-0.376741	-0.337263	0.128254	0.643802	0.668772	0.582646	0.845321	0.708502	0.154394	0.00861502	-0.135881	0.372171	0.533323	0.124626	0.0562235	0.140571	-0.00714407	0.213195	-0.179302	-0.142874	0.112865	-0.0158922	-0.31983	-0.413631	-0.183232	0.0370169
FAM195A	blue	0.204004	-0.472814	-0.704002	-0.520834	-0.735334	-0.148472	-0.392045	-0.147413	-0.464232	-0.347643	-0.550429	-0.506316	-0.470021	-0.325217	-0.782299	-0.596964	-0.419124	0.259546	0.515776	0.298157	0.81723	0.767997	0.722684	0.0449933	-0.061986	-0.0765776	0.138173	0.318991	-0.139488	0.133121	0.456668	0.268135	0.378955	0.088116	0.215318	0.308879	0.315981	0.178577	0.0473192	0.0535245	0.261961
MYEOV2	blue	0.112091	-0.531675	-0.699261	-0.105795	-0.531762	0.00944665	-0.159016	0.0297725	-0.217412	-0.516085	-0.53358	-0.315718	-0.280256	-0.31665	-0.597453	-0.257787	-0.283572	0.183243	0.424417	0.45497	0.560683	0.80936	0.679262	0.043168	0.0202411	0.3218	0.283317	0.635523	0.316367	0.0698947	0.0628456	-0.191789	0.139083	-0.321565	0.0454458	0.164715	0.135993	0.0464142	-0.048581	-0.0300128	0.167416
CHCHD1	blue	0.263744	-0.434032	-0.59589	-0.210954	-0.488846	-0.0638001	-0.190055	-0.0714906	-0.279038	-0.24708	-0.314959	-0.280654	-0.253328	0.0460986	-0.452158	-0.335116	-0.322211	0.0189297	0.323276	0.353516	0.580655	0.721161	0.677661	0.097943	-0.216719	-0.113096	0.262489	0.547376	0.154966	-0.0892928	0.106617	0.0175262	0.0416872	-0.151242	0.00190616	0.246414	0.11167	-0.0570606	-0.065341	0.00817368	0.128771
MRPL52	blue	-0.00265692	-0.370614	-0.665887	0.0773239	-0.284647	0.238504	0.0953972	0.143579	-0.0335979	-0.552884	-0.634212	-0.357969	-0.476551	-0.303967	-0.602692	-0.131039	-0.295126	0.00467433	0.437915	0.607823	0.470571	0.84368	0.702272	0.00454396	-0.013551	0.174801	0.248468	0.730089	0.363242	-0.0662795	0.118077	-0.211639	-0.0550625	-0.273532	-0.15961	0.051814	-0.156289	-0.162616	-0.227273	-0.00169177	0.0645636
TMEM134	blue	0.300529	-0.518524	-0.755755	-0.266094	-0.594271	0.0573008	-0.150306	0.0573881	-0.256953	-0.27718	-0.2873	-0.115106	-0.118315	-0.00185247	-0.494841	-0.345333	-0.302712	-0.000637772	0.444816	0.544613	0.622769	0.802108	0.73759	0.168331	-0.000549494	-0.102273	0.377416	0.537294	0.173471	0.117134	-0.0253611	-0.128784	0.131147	-0.251526	-0.0797358	0.215196	0.0431846	-0.255284	-0.356183	-0.138867	0.122743
TRMT112	blue	-0.00133779	-0.217959	-0.659432	0.130214	-0.186026	0.406935	0.259796	0.241154	0.0439538	-0.347874	-0.487194	-0.370967	-0.621134	-0.294771	-0.643924	-0.172026	-0.458232	-0.018898	0.481151	0.692935	0.332338	0.828159	0.680506	0.0509496	0.0347627	0.0946384	0.168306	0.765842	0.336844	-0.352828	0.270335	-0.0453763	0.100106	-0.0886233	-0.273787	-0.0838379	-0.392385	-0.160572	-0.291776	0.11316	0.139995
MRP63	blue	0.144486	-0.354829	-0.526548	-0.0579923	-0.336939	0.0936071	-0.0653008	0.147734	-0.08027	-0.270486	-0.222106	0.0169217	-0.0456374	-0.0811823	-0.424723	-0.208858	-0.288998	0.072558	0.380468	0.451104	0.437347	0.73895	0.547484	0.0690714	0.077943	0.0560943	0.270328	0.6587	0.310255	-0.00634792	-0.0982836	-0.218236	-0.00357038	-0.156546	0.176039	-0.0901637	-0.00337565	-0.20283	-0.0678285	-0.117006	-0.177378
COMMD1	blue	0.201157	-0.414232	-0.694827	0.157326	-0.242552	0.348184	0.164798	0.32914	0.1642	-0.383588	-0.271679	0.0445054	-0.13101	-0.091231	-0.363569	-0.0116334	-0.238222	-0.0826504	0.362309	0.654532	0.21366	0.744178	0.602623	0.272872	0.130152	0.12993	0.469827	0.838173	0.55776	-0.0429773	-0.0464521	-0.23333	-0.0281242	-0.355764	-0.186294	-0.236692	-0.3671	-0.43678	-0.446765	-0.209263	-0.1278
MZT2A	blue	0.116696	-0.410591	-0.697344	-0.262559	-0.545277	0.112554	-0.127494	0.12681	-0.20461	-0.291464	-0.436996	-0.297862	-0.406558	-0.278594	-0.647864	-0.429085	-0.45375	0.149697	0.522863	0.502481	0.590193	0.831154	0.733089	-0.0132413	-0.0747414	-0.0123566	0.167124	0.541412	0.0780822	0.088306	0.333002	0.0937721	0.320096	-0.00121554	0.064974	0.0172413	-0.0511124	0.0152372	-0.0791526	-0.0196186	0.15
FKBP2	blue	0.0707334	-0.1909	-0.678987	0.0362987	-0.268998	0.444925	0.268178	0.26467	-0.0421523	-0.30089	-0.447859	-0.270463	-0.534362	-0.4036	-0.686575	-0.295467	-0.536218	0.0593283	0.603168	0.768101	0.453584	0.895308	0.627162	-0.045662	-0.00301765	0.0757315	0.0912068	0.728533	0.253882	-0.146243	0.119524	-0.143472	0.188817	-0.0849194	-0.139994	0.00784123	-0.216282	-0.231047	-0.36306	-0.0467605	0.0679943
USMG5	blue	0.0684692	-0.49304	-0.63672	0.132104	-0.314856	0.0620203	0.0165296	0.119684	-0.0773067	-0.317598	-0.275435	-0.154715	-0.265983	-0.125083	-0.431327	-0.140259	-0.34056	-0.172554	0.136046	0.415135	0.342564	0.741632	0.687701	0.21323	0.0730677	0.124108	0.314871	0.823587	0.472868	-0.180998	0.0922803	-0.124872	0.0665515	-0.214842	-0.0644741	-0.0135831	-0.15177	-0.0715718	-0.129054	0.0147986	0.12151
HRAS	blue	0.191091	-0.388975	-0.801813	-0.179196	-0.508692	0.306589	-0.0025965	0.288287	-0.0585929	-0.432278	-0.492582	-0.224697	-0.375404	-0.303999	-0.722539	-0.330573	-0.398344	0.280818	0.691551	0.716868	0.527268	0.903045	0.725665	0.120841	0.124274	0.19401	0.329565	0.66585	0.250683	-0.0242648	0.123606	-0.173798	0.184054	-0.259169	-0.104628	-0.00325032	-0.129502	-0.261403	-0.338581	-0.119821	0.0146593
YIF1A	blue	0.167994	-0.323499	-0.61863	-0.324518	-0.554889	0.0782453	-0.0929739	0.0129835	-0.343635	-0.115776	-0.200999	-0.141788	-0.154906	-0.0425229	-0.53564	-0.49389	-0.453507	-0.00673977	0.428753	0.505914	0.635995	0.729197	0.590235	0.144395	-0.204758	-0.231231	0.141998	0.404787	-0.0206002	0.162045	-0.0784367	-0.130496	0.12174	-0.0957501	-0.0748789	0.344612	0.148476	-0.212397	-0.312397	-0.129319	0.127371
NDUFA11	blue	0.0644882	-0.286735	-0.657046	0.055996	-0.299473	0.307259	0.192642	0.191551	-0.111479	-0.222331	-0.295841	-0.147989	-0.314134	-0.166308	-0.547677	-0.264133	-0.499019	-0.0570925	0.473569	0.707527	0.467605	0.901297	0.659898	0.0223736	-0.0634608	-0.0133662	0.166486	0.797552	0.334631	-0.141582	-0.0404677	-0.225947	0.0817046	-0.156148	-0.158826	0.0445811	-0.174752	-0.25467	-0.303905	-0.0340738	0.0324155
C19orf70	blue	0.134456	-0.258045	-0.712284	-0.20467	-0.464164	0.320884	0.0683465	0.267212	-0.136639	-0.195297	-0.329398	-0.173179	-0.365145	-0.299282	-0.704632	-0.469516	-0.573749	0.211746	0.668025	0.704511	0.552688	0.927009	0.697219	-0.00956941	0.0272656	-0.0035406	0.146804	0.647327	0.116668	-0.0330285	0.111838	-0.0721258	0.361435	-0.0111472	-0.00148893	0.0028946	-0.0938751	-0.252281	-0.299186	-0.0468605	-0.00955165
BANF1	blue	0.116741	-0.316511	-0.72456	-0.0545299	-0.301716	0.311206	0.0642396	0.116929	0.0170112	-0.451713	-0.543134	-0.408018	-0.607635	-0.12962	-0.624794	-0.131912	-0.273367	0.043899	0.518257	0.633928	0.422895	0.782371	0.678945	0.112694	-0.00219827	-0.00768791	0.389289	0.673856	0.312788	-0.302726	0.316814	0.035545	-0.073928	-0.243214	-0.356197	-0.000330817	-0.282134	-0.235297	-0.390555	-0.00163683	0.118666
CLTB	blue	0.0128418	-0.114015	-0.542254	0.324679	-0.00505317	0.574007	0.476384	0.388199	0.193793	-0.270752	-0.302107	-0.0880494	-0.347452	-0.14457	-0.396513	0.0145177	-0.376516	-0.0828601	0.4981	0.836227	0.203193	0.801499	0.555231	-0.0945962	-0.0152608	0.0816384	0.182829	0.859521	0.513734	-0.264226	-0.0718839	-0.355521	-0.113713	-0.268818	-0.363986	-0.140889	-0.485533	-0.366579	-0.483528	-0.0718687	0.0323609
DRAP1	blue	0.0343597	-0.0853376	-0.558994	-0.0326789	-0.259543	0.38242	0.256503	0.199228	-0.150365	-0.139814	-0.340929	-0.274799	-0.487187	-0.255233	-0.640508	-0.38485	-0.628891	0.0667407	0.585207	0.711775	0.487574	0.876384	0.659437	-0.121678	-0.130389	-0.0967309	-0.0334713	0.671058	0.135146	-0.128309	0.0908688	-0.107938	0.200206	0.0324255	-0.11008	0.0445347	-0.201534	-0.133772	-0.26847	0.0975187	0.178652
CCDC85B	blue	0.125547	-0.256349	-0.505904	-0.273836	-0.470806	0.137193	-0.129262	0.204713	-0.148362	-0.262229	-0.397806	-0.207309	-0.301003	-0.448487	-0.597427	-0.39117	-0.393618	0.401932	0.616179	0.427199	0.521471	0.687743	0.535253	-0.155736	0.0634811	0.151629	0.0201653	0.357085	0.000287048	0.148888	0.246683	0.010388	0.332534	0.00507084	0.268692	-0.0438296	0.0466805	0.0501729	-0.0384854	-0.11722	0.0789336
LINC00116	blue	0.0204667	-0.238145	-0.585079	-0.183541	-0.420798	0.256199	0.0411472	0.219486	-0.154287	-0.163397	-0.36491	-0.23053	-0.415139	-0.313467	-0.63297	-0.440043	-0.524057	0.0629084	0.542116	0.611767	0.553962	0.838099	0.584872	-0.0973125	-0.148103	-0.100187	0.030591	0.535149	0.0351535	0.0105536	0.165782	0.00920806	0.255716	0.0687136	-0.0446466	0.0845641	-0.0681688	-0.107479	-0.199361	-0.0347227	0.0911208
AURKAIP1	blue	0.191908	-0.401666	-0.750805	-0.236126	-0.562276	0.136787	-0.0711027	0.0798785	-0.271937	-0.259936	-0.347288	-0.221335	-0.292089	-0.184524	-0.650778	-0.432993	-0.490547	0.122497	0.561086	0.608396	0.652734	0.920752	0.741219	0.0604492	-0.106888	-0.0446643	0.235334	0.670512	0.187589	-0.0019129	0.0728855	-0.0985353	0.200434	-0.127375	0.00684115	0.159449	0.0563465	-0.132311	-0.217507	-0.0988108	0.0993605
TOMM5	blue	-0.037655	-0.424675	-0.603842	0.240522	-0.188971	0.138217	0.0838081	0.082385	0.00453781	-0.522676	-0.471742	-0.258761	-0.379627	-0.263887	-0.469652	0.00947957	-0.228524	-0.115516	0.205791	0.458499	0.287175	0.703998	0.552513	0.00233216	-0.00572612	0.298064	0.322537	0.81194	0.553681	-0.246604	0.0699676	-0.237716	-0.13496	-0.282525	-0.140939	-0.0065458	-0.169023	-0.0316066	-0.115535	0.0297033	0.132992
SWI5	blue	0.168956	-0.291772	-0.600796	-0.245051	-0.490022	-0.0294825	-0.0990641	-0.119962	-0.433897	-0.087718	-0.251248	-0.341563	-0.394134	-0.0220157	-0.635872	-0.539931	-0.595158	0.0176707	0.326219	0.365909	0.64218	0.749541	0.696107	0.138377	-0.182934	-0.167545	0.0606489	0.523035	-0.00201793	-0.0378846	0.0882878	0.00834802	0.11743	-0.0101387	-0.000487179	0.286336	0.137024	-0.0774317	-0.0783657	0.180979	0.149385
COX8A	blue	0.0092027	-0.131832	-0.377703	-0.3535	-0.474359	-0.094615	-0.149772	-0.158938	-0.52142	-0.0866721	-0.368856	-0.449689	-0.401928	-0.239354	-0.678071	-0.629998	-0.590032	0.20255	0.429514	0.270378	0.741817	0.698213	0.631802	-0.078854	-0.146664	-0.217674	-0.218114	0.30706	-0.230336	0.175109	0.232751	0.13449	0.285731	0.210439	0.237852	0.34697	0.299739	0.171035	0.092374	0.22576	0.265004
DPP7	blue	0.266429	-0.378843	-0.692157	-0.282118	-0.533607	0.114207	-0.0841768	0.0352087	-0.262518	-0.117008	-0.231589	-0.213486	-0.275543	0.00644435	-0.517063	-0.391626	-0.384494	0.0724703	0.520869	0.54468	0.579386	0.765624	0.677277	0.0114481	0.00704741	-0.139469	0.258183	0.465343	0.0502446	-0.117494	0.112039	0.0992619	0.2539	-0.109413	-0.11737	0.212561	-0.0205695	-0.175688	-0.25191	0.043928	0.149307
ATOX1	blue	-0.0717252	-0.179902	-0.565653	0.124056	-0.180895	0.405513	0.275352	0.316907	0.0802469	-0.291221	-0.341784	-0.190221	-0.374166	-0.144468	-0.499428	-0.146742	-0.410202	0.0468584	0.449276	0.683542	0.323977	0.797569	0.617588	-0.10379	-0.0168629	0.126057	0.136878	0.75073	0.359078	-0.187738	-0.0587791	-0.338018	0.0625473	-0.222816	-0.238744	0.00559679	-0.254676	-0.215448	-0.328172	-0.0624446	0.0689272
POLR2L	blue	0.0888775	-0.261242	-0.619457	-0.24474	-0.484115	0.089352	-0.0835514	0.0114761	-0.331068	-0.352982	-0.555871	-0.459021	-0.497496	-0.348658	-0.811606	-0.488826	-0.513443	0.28141	0.588892	0.498226	0.7091	0.85405	0.71761	0.0367182	0.00483817	0.0599501	0.0471626	0.517523	0.0164933	0.0704511	0.21041	-0.0518691	0.113344	-0.0538704	0.0802055	0.20938	0.136797	-0.0425492	-0.108459	0.120555	0.127799
NDUFAF3	blue	0.0422844	-0.114554	-0.592407	-0.00288285	-0.222066	0.524311	0.263942	0.369208	0.0738052	-0.317014	-0.425407	-0.167776	-0.399627	-0.336909	-0.613054	-0.21101	-0.410379	0.231684	0.730618	0.812477	0.396285	0.848422	0.534701	-0.138166	0.0452588	0.150509	0.136913	0.638119	0.244596	-0.0575206	-0.00925164	-0.274468	0.123423	-0.163659	-0.131926	-0.102597	-0.225424	-0.315298	-0.417302	-0.133594	-0.0565129
COX14	blue	0.0668241	-0.211057	-0.572725	0.0262842	-0.228512	0.297244	0.170301	0.20355	-0.0341383	-0.210771	-0.345917	-0.293836	-0.533899	-0.100324	-0.564766	-0.280742	-0.520435	-0.0264144	0.430836	0.578	0.41863	0.816022	0.686142	-0.0107575	-0.055167	-0.12802	0.0954477	0.748214	0.236082	-0.257146	0.222081	0.0116956	0.102878	0.00369713	-0.101386	-0.0403914	-0.290864	-0.15578	-0.202662	0.0515617	0.0973794
EXOSC4	blue	0.254315	-0.247283	-0.611269	-0.165965	-0.383609	0.251881	0.0494979	0.176643	-0.13447	-0.255037	-0.361355	-0.207691	-0.306991	-0.114273	-0.56779	-0.344234	-0.431446	0.159633	0.594613	0.622724	0.565004	0.840857	0.664068	0.070874	-0.09076	-0.0896986	0.183	0.629858	0.177877	-0.0352727	0.0698156	-0.148799	0.0169272	-0.137653	-0.00423017	0.0573972	-0.0411673	-0.219036	-0.262898	-0.0961032	0.0224544
SEPW1	blue	0.177875	-0.547368	-0.766673	-0.0212244	-0.436454	0.267323	-0.0367611	0.313804	0.119722	-0.60177	-0.516097	-0.110919	-0.217815	-0.253726	-0.499251	-0.0654759	-0.129103	0.143901	0.517714	0.637323	0.393447	0.823404	0.660068	0.0427304	0.176846	0.361304	0.494169	0.706882	0.461812	0.0788031	0.0476912	-0.292274	0.0444403	-0.441794	-0.0625772	-0.134768	-0.149976	-0.237211	-0.277762	-0.275218	-0.0815675
EIF3K	blue	0.0872878	-0.172706	-0.542687	0.121117	-0.173937	0.317447	0.246704	0.27691	-0.0304599	-0.151616	-0.213367	-0.0654848	-0.241819	-0.179484	-0.50813	-0.243143	-0.521426	-0.0229182	0.38563	0.593652	0.32805	0.772138	0.602006	0.146418	0.124447	0.0582373	0.115373	0.765001	0.33015	-0.149712	-0.0337889	-0.217056	0.11526	-0.077556	0.0425029	-0.154747	-0.211869	-0.23894	-0.169797	0.0047663	-0.114617
DPM3	blue	0.265368	-0.452251	-0.717402	-0.339547	-0.581562	0.0574486	-0.198151	0.0254027	-0.230142	-0.421677	-0.546323	-0.370947	-0.36293	-0.0499657	-0.61322	-0.375632	-0.277158	0.1459	0.53741	0.520668	0.686056	0.850564	0.796282	0.17117	-0.115384	-0.103241	0.341327	0.530574	0.103907	0.102238	0.232959	0.0165445	0.0703921	-0.189376	-0.0619658	0.195037	0.0783812	-0.144376	-0.225263	-0.0455094	0.11257
GADD45GIP1	blue	0.240777	-0.339238	-0.787551	-0.227872	-0.525744	0.270178	-0.00960364	0.185642	-0.156481	-0.359764	-0.509696	-0.338443	-0.491613	-0.217264	-0.762578	-0.421777	-0.502958	0.215645	0.68355	0.695631	0.636972	0.932855	0.742803	0.00665658	-0.13044	-0.0388047	0.235029	0.65767	0.158738	-0.095981	0.179409	-0.0387852	0.138005	-0.11087	-0.11994	0.114861	-0.0854123	-0.145476	-0.307917	-0.032504	0.173442
SHARPIN	blue	0.227769	-0.198839	-0.70874	-0.290983	-0.458858	0.282161	0.0186931	0.0692569	-0.211506	-0.270113	-0.427806	-0.305234	-0.385865	-0.147504	-0.679205	-0.389437	-0.397982	0.233363	0.729167	0.689676	0.601885	0.810629	0.667245	0.0917279	-0.0511513	-0.111972	0.249645	0.453494	0.0333769	-0.0256706	0.116201	-0.0418298	0.0512108	-0.176017	-0.218311	0.179705	-0.0218487	-0.320888	-0.419316	-0.0496071	0.0304789
SSR4	blue	0.167174	-0.419903	-0.768374	-0.00779404	-0.383205	0.267241	0.0899028	0.142053	-0.0673009	-0.460534	-0.48959	-0.284528	-0.363141	-0.0740187	-0.558566	-0.148796	-0.28887	0.0340797	0.519973	0.710653	0.497636	0.904174	0.787653	0.0505275	0.0212366	0.0868225	0.38739	0.785772	0.405258	-0.114044	0.046084	-0.228282	-0.0164724	-0.3657	-0.258433	0.0726881	-0.189449	-0.239262	-0.350326	-0.029529	0.116387
MRPL14	blue	-0.0796984	-0.193024	-0.534477	0.171537	-0.170206	0.3477	0.270248	0.271886	0.00771618	-0.226993	-0.309907	-0.17359	-0.367655	-0.244319	-0.510175	-0.192089	-0.483217	-0.054973	0.372485	0.634877	0.319653	0.791468	0.556366	0.0593125	-0.0691421	0.0531339	0.0829766	0.801369	0.364864	-0.142622	0.0313036	-0.212586	0.0490236	-0.11457	-0.16841	-0.0733551	-0.272469	-0.206629	-0.243748	0.0149756	0.0178003
TRAPPC5	blue	0.186904	-0.292639	-0.664512	-0.151772	-0.437917	0.278382	0.044041	0.230257	-0.112317	-0.26634	-0.401482	-0.225057	-0.384134	-0.201036	-0.626046	-0.367647	-0.475578	0.123987	0.595133	0.655829	0.554472	0.859493	0.658439	-0.0780626	-0.126423	-0.0409163	0.151805	0.594248	0.136621	-0.0523054	0.0953993	-0.112584	0.0860599	-0.0912694	-0.0867897	0.0879908	-0.104707	-0.157965	-0.328319	-0.103097	0.142759
LSM10	blue	0.126855	-0.306254	-0.667533	-0.0665511	-0.350663	0.294417	0.0682317	0.148674	-0.0544926	-0.487586	-0.630779	-0.458808	-0.554379	-0.353734	-0.654815	-0.172168	-0.292051	0.187258	0.60163	0.648402	0.477408	0.79425	0.651906	0.0292547	0.0321822	0.138499	0.227933	0.59608	0.261061	-0.117188	0.299182	0.00779266	0.15855	-0.227063	-0.190383	0.0512075	-0.186548	-0.109705	-0.316062	0.0152592	0.218363
COA4	blue	0.136259	-0.363419	-0.609562	-0.134382	-0.406863	0.146114	-0.0603614	0.194092	-0.0699434	-0.341806	-0.287099	-0.0460155	-0.125623	-0.0369217	-0.484217	-0.260619	-0.306383	0.11379	0.438975	0.513157	0.479375	0.741557	0.609847	0.0875031	-0.00549032	0.00333079	0.292959	0.608526	0.252726	0.0689656	-0.143343	-0.29983	-0.0300063	-0.192257	0.0177085	0.052802	-0.0510229	-0.28622	-0.284889	-0.132278	-0.0323045
MRPS11	blue	-0.0245424	-0.196082	-0.491564	0.164725	-0.109275	0.439831	0.250165	0.396562	0.226676	-0.406124	-0.373169	-0.00379679	-0.179843	-0.257503	-0.408782	0.000682286	-0.208736	0.0745036	0.472604	0.682496	0.20865	0.731792	0.434889	0.00245227	0.0734781	0.268669	0.234732	0.719174	0.448018	-0.0284518	-0.150687	-0.409847	-0.0663136	-0.336489	-0.0822203	-0.235061	-0.268673	-0.383237	-0.333054	-0.303918	-0.268263
NOP10	blue	-0.0789637	-0.141384	-0.514903	-0.00619151	-0.229849	0.203242	0.129297	-0.0548798	-0.19583	-0.406662	-0.620682	-0.629657	-0.689247	-0.274466	-0.698164	-0.2408	-0.435991	0.111888	0.455104	0.511753	0.46999	0.73724	0.61757	-0.0423151	-0.201547	0.0509021	0.0188975	0.61133	0.198946	-0.2995	0.286099	0.0164357	0.0890116	-0.0860408	-0.156738	0.179499	-0.106459	0.108004	-0.115858	0.217864	0.370383
LSMD1	blue	0.276696	-0.405457	-0.701404	-0.378945	-0.60464	0.0378402	-0.205935	0.0450322	-0.283949	-0.317081	-0.490823	-0.345768	-0.388317	-0.131541	-0.698881	-0.505723	-0.433517	0.152341	0.538681	0.480927	0.722903	0.886724	0.817253	0.0906964	-0.0541289	-0.152295	0.221434	0.528093	0.00712121	0.0858808	0.281003	0.0881451	0.207406	-0.0308308	0.0996837	0.12982	0.0912292	-0.120216	-0.11401	0.0123796	0.0322342
SMDT1	blue	0.273445	-0.53061	-0.745364	-0.421107	-0.687454	-0.107259	-0.34847	-0.104661	-0.375898	-0.388337	-0.514773	-0.377304	-0.332578	-0.167292	-0.683233	-0.468699	-0.326322	0.133664	0.502075	0.384209	0.786365	0.84429	0.856209	0.227822	0.0263351	-0.157784	0.330048	0.484827	0.0232816	0.136051	0.390829	0.211924	0.156308	-0.0671953	0.154774	0.191367	0.182669	-0.0486928	-0.0692406	-0.0199432	0.0943778
MRPL54	blue	0.254292	-0.300748	-0.677287	-0.209062	-0.45406	0.237281	-0.0112233	0.240608	-0.0973038	-0.222779	-0.307972	-0.134752	-0.278919	-0.0512795	-0.631104	-0.415707	-0.485423	0.117428	0.551478	0.61969	0.536108	0.88139	0.701252	0.149894	-0.0375552	-0.118024	0.261592	0.69159	0.178739	-0.0932125	0.0776263	-0.0844025	0.126416	-0.0441732	0.0151803	-0.0449554	-0.0981695	-0.269263	-0.232497	-0.0646217	-0.0886168
NDUFB1	blue	0.132737	-0.37116	-0.61288	-0.0691983	-0.38253	0.16264	0.00910001	0.22948	-0.0795874	-0.264852	-0.291487	-0.093427	-0.241288	-0.14616	-0.525332	-0.324611	-0.430055	-0.00315581	0.389397	0.518767	0.49262	0.849825	0.746851	0.0843669	0.114441	-0.0500916	0.200934	0.726565	0.251175	0.0485773	0.0780314	-0.119263	0.184782	-0.0329681	0.125013	-0.0752611	-0.116677	-0.210962	-0.152957	-0.0702684	-0.0639325
COA3	blue	0.220906	-0.457263	-0.688374	-0.0550419	-0.391854	0.118439	-0.0609421	0.13295	-0.0534627	-0.396648	-0.331655	-0.126323	-0.18778	0.0382763	-0.477658	-0.167236	-0.25862	0.0724448	0.393518	0.513122	0.472916	0.814313	0.7326	0.198148	0.101792	0.0490498	0.440302	0.773049	0.406584	-0.0862629	0.00557277	-0.200592	-0.0811202	-0.356039	-0.0551182	-0.0240608	-0.0763281	-0.315964	-0.256878	-0.130239	-0.118413
UQCR10	blue	0.0595372	-0.509665	-0.675462	-0.121308	-0.518661	-0.0926274	-0.187466	-0.0570638	-0.327495	-0.398066	-0.45292	-0.369702	-0.349368	-0.260709	-0.652922	-0.353031	-0.397145	0.0823716	0.289812	0.347142	0.580934	0.780396	0.686741	0.125406	-0.0299219	0.216023	0.219688	0.634643	0.240531	-0.0343881	0.148936	-0.0890141	0.134433	-0.173374	0.0732854	0.199509	0.16021	0.109085	0.0572936	0.115224	0.185132
THAP7	blue	0.398472	-0.463857	-0.762855	-0.277875	-0.525339	0.227098	-0.137201	0.175722	0.00547747	-0.426166	-0.366856	-0.082845	-0.098863	-0.00325052	-0.43408	-0.150603	-0.0677259	0.247845	0.667016	0.636543	0.501951	0.747798	0.621632	0.188085	0.0693267	-0.00284506	0.604689	0.527039	0.287058	0.0418027	0.0789037	-0.104277	-0.0337606	-0.389421	-0.131611	0.00707206	-0.0351939	-0.382105	-0.425063	-0.326248	-0.108919
PTRHD1	blue	0.195507	-0.52514	-0.670932	-0.297937	-0.621478	-0.157948	-0.312958	-0.107005	-0.360766	-0.39302	-0.405019	-0.282697	-0.173527	-0.141152	-0.607954	-0.400985	-0.302969	0.184936	0.371617	0.313782	0.655182	0.74963	0.705387	0.177987	0.101494	0.0717815	0.321534	0.521308	0.154881	0.087544	0.0973209	-0.045993	0.191089	-0.161041	0.138212	0.253146	0.264361	-0.0577499	-0.0583063	0.0263723	0.0868313
SIVA1	blue	0.344831	-0.39409	-0.666013	-0.399992	-0.584907	0.100549	-0.198514	0.0422265	-0.203246	-0.448946	-0.592452	-0.385763	-0.342749	-0.0886391	-0.601509	-0.346457	-0.229351	0.288153	0.660739	0.535418	0.692213	0.819114	0.769769	0.0116006	-0.0564488	-0.121529	0.292248	0.450042	0.0606083	0.135206	0.276746	0.0817466	0.197976	-0.182176	0.0237743	0.150627	0.062262	-0.0771181	-0.231999	-0.123391	0.168353
SIGIRR	blue	0.217791	-0.352318	-0.57438	-0.476193	-0.653788	-0.139332	-0.316687	-0.141938	-0.506949	-0.176817	-0.398022	-0.445542	-0.39168	-0.129746	-0.674256	-0.612331	-0.479856	0.181291	0.446703	0.286577	0.771387	0.690125	0.64871	-0.00614993	-0.194341	-0.196074	0.0298454	0.268166	-0.177391	0.0458292	0.282824	0.161092	0.322431	0.0761126	0.0908376	0.383202	0.299858	0.160844	0.0111514	0.162507	0.329886
CCDC137	blue	0.0665125	-0.151093	-0.623898	-0.112632	-0.308015	0.327875	0.117808	0.158657	-0.126939	-0.263232	-0.424376	-0.282388	-0.49664	-0.254055	-0.656119	-0.331568	-0.45213	0.164943	0.615196	0.657109	0.489933	0.761599	0.517431	-0.0729989	-0.137797	0.0854598	0.128212	0.524406	0.11336	-0.159018	0.0355219	-0.181978	0.0343664	-0.123407	-0.199616	0.161604	-0.0558457	-0.23511	-0.300076	0.0532741	0.0478427
C14orf80	blue	0.127498	-0.175007	-0.527081	-0.301307	-0.438341	0.322175	0.0335078	0.383412	-0.04647	0.0220708	-0.0872303	0.0499003	-0.16469	-0.255172	-0.497897	-0.481228	-0.494567	0.212257	0.60447	0.569407	0.410896	0.687019	0.491321	-0.0638881	0.211699	-0.139835	0.0437272	0.372778	-0.0640699	0.110959	0.14696	0.0835983	0.61797	0.170724	0.117187	-0.132378	-0.136458	-0.266184	-0.273225	-0.183292	-0.108014
MRPL40	blue	0.235322	-0.464944	-0.706839	-0.339281	-0.598161	-0.00730162	-0.198802	-0.00723379	-0.292586	-0.212315	-0.289539	-0.21415	-0.227108	-0.124302	-0.588655	-0.445407	-0.386622	-0.0193568	0.406277	0.427279	0.641443	0.791461	0.736432	0.24665	0.0309314	-0.245171	0.297759	0.539769	0.0790863	0.0518055	0.313627	0.196731	0.262972	0.0249227	0.123955	0.124221	0.0862665	-0.103275	-0.146027	-0.112016	0.0472029
NDUFA13	blue	0.184711	-0.302739	-0.656081	-0.254793	-0.482492	0.129143	-0.0403942	0.0733577	-0.266324	-0.209971	-0.36993	-0.301964	-0.395859	-0.13919	-0.6612	-0.474707	-0.525644	0.111609	0.531121	0.538222	0.675567	0.905186	0.811177	0.0557822	-0.0317006	-0.195365	0.134013	0.631371	0.0714029	0.0372026	0.242172	0.0412691	0.19886	0.00413224	0.0663124	0.103858	0.0154515	-0.135689	-0.178041	-0.0106701	0.0665478
C6orf1	blue	0.0154452	-0.315905	-0.709794	-0.00893935	-0.341201	0.307553	0.122497	0.10133	-0.0936145	-0.462477	-0.599693	-0.465984	-0.603628	-0.383948	-0.665645	-0.200105	-0.358544	0.0435506	0.514611	0.66416	0.453913	0.787011	0.625575	0.0500573	-0.134008	0.149357	0.215645	0.609345	0.266877	-0.200199	0.225168	-0.109335	0.108827	-0.201396	-0.328667	0.1897	-0.167854	-0.0704854	-0.345002	0.0519128	0.326945
RPS19BP1	blue	0.102089	-0.336981	-0.709047	-0.0796962	-0.408612	0.313971	0.0613466	0.244791	-0.0509783	-0.440263	-0.530144	-0.255391	-0.416806	-0.471455	-0.679477	-0.283561	-0.396611	0.241866	0.654844	0.677533	0.490716	0.880153	0.634225	-0.0496458	0.110349	0.238262	0.202247	0.662454	0.261053	-0.000136523	0.170637	-0.126386	0.275012	-0.15616	0.00232721	-0.0305461	-0.0970517	-0.169501	-0.252212	-0.116809	0.0109856
MRPS21	blue	0.16532	-0.377878	-0.612759	-0.128749	-0.405295	0.0251659	-0.098229	0.0189094	-0.178363	-0.244996	-0.305947	-0.276727	-0.382694	-0.0810868	-0.543412	-0.321862	-0.384663	-0.0366336	0.288526	0.366497	0.502964	0.72882	0.680823	0.133741	-0.0215597	-0.147235	0.252208	0.633997	0.199565	-0.140199	0.288945	0.110091	0.0511332	0.0191512	0.025625	0.0644029	-0.0356617	-0.0508435	-0.0781698	0.0425981	0.101701
RP11-195F19.5	blue	0.0926163	-0.228995	-0.574832	-0.184713	-0.391605	0.250662	0.0166394	0.270855	-0.102595	-0.230186	-0.41338	-0.192552	-0.406472	-0.495514	-0.661095	-0.430597	-0.480398	0.154458	0.566052	0.541356	0.52127	0.791926	0.611852	-0.0284896	0.130748	0.0292055	0.0270099	0.463699	-0.00821508	0.134594	0.299842	0.0300693	0.319485	0.159449	0.208069	-0.0776236	-0.0667573	-0.156842	-0.12171	-0.0231209	-0.0862596
NANOS3	blue	0.220443	-0.337067	-0.563701	-0.45441	-0.599128	0.0180768	-0.266632	0.13807	-0.250911	-0.179381	-0.338358	-0.232536	-0.310474	-0.314034	-0.653955	-0.567654	-0.442306	0.25782	0.544198	0.346721	0.658744	0.724113	0.680568	0.0483831	0.187388	-0.12031	0.0934272	0.297553	-0.175017	0.252812	0.447358	0.250124	0.430923	0.216411	0.347001	0.0081642	0.116708	-0.0308607	-0.0413396	-0.0416798	0.0121226
CYHR1	blue	0.15363	-0.169624	-0.634282	-0.412346	-0.492555	0.189177	-0.0982604	-0.0186884	-0.278193	-0.224395	-0.445344	-0.403898	-0.500865	-0.1787	-0.700155	-0.45997	-0.375956	0.315242	0.707882	0.557179	0.655456	0.723441	0.550748	-0.000193879	-0.095281	-0.0923472	0.180504	0.297131	-0.117538	-0.0627429	0.196333	0.0548143	0.100758	-0.13807	-0.215129	0.314188	0.159326	-0.257664	-0.350524	-0.0323912	0.0299843
LAMTOR4	blue	0.192758	-0.34831	-0.731118	-0.121847	-0.423182	0.223875	0.0323404	0.141424	-0.147278	-0.309116	-0.418709	-0.288402	-0.425336	-0.0779548	-0.655627	-0.361947	-0.464198	0.057682	0.520188	0.628298	0.555321	0.896416	0.772666	0.142489	-0.00748252	-0.021207	0.255313	0.700299	0.203466	-0.119914	0.142228	-0.0924424	0.0690357	-0.171918	-0.105838	0.0544307	-0.12516	-0.28531	-0.256601	0.019298	-0.0282939
H2AFX	blue	0.0434229	-0.18651	-0.576388	-0.167403	-0.339754	0.364018	0.107944	0.168137	-0.0627865	-0.252114	-0.400809	-0.262959	-0.428553	-0.313735	-0.545124	-0.250667	-0.32664	0.0842489	0.632146	0.668981	0.490864	0.737004	0.526253	-0.0897616	-0.089866	-0.11617	0.136174	0.447106	0.0924006	0.0110827	0.276175	0.025544	0.110018	-0.0997347	-0.165353	0.077505	-0.116331	-0.1672	-0.404955	-0.284551	0.133682
TMEM120A	blue	0.0445049	-0.163438	-0.644784	-0.052776	-0.32944	0.3071	0.184783	0.016478	-0.223417	-0.30206	-0.456193	-0.420785	-0.496752	-0.328487	-0.651667	-0.277012	-0.447145	0.13433	0.527202	0.65016	0.492766	0.726134	0.488326	0.0337051	-0.243302	0.0981547	0.0950307	0.545639	0.210318	-0.158313	-0.0164177	-0.217942	0.152531	-0.234213	-0.312511	0.330744	0.0539391	-0.0968712	-0.405879	-0.00818887	0.276764
MYL6B	blue	0.242731	-0.408158	-0.652839	-0.426262	-0.628326	-0.0370534	-0.272351	0.0124356	-0.338928	-0.258716	-0.345118	-0.252613	-0.245914	-0.0925519	-0.64631	-0.507154	-0.399231	0.327747	0.551934	0.392744	0.685284	0.790551	0.758388	0.0741785	0.0893109	-0.00906734	0.240931	0.456043	0.000151439	0.141019	0.208666	0.0470519	0.284458	-0.114115	0.166844	0.127524	0.195659	-0.0483938	-0.0247069	0.00299564	0.0437719
LAGE3	blue	0.0145215	-0.245893	-0.60468	0.0516702	-0.289628	0.295576	0.181432	0.213955	-0.101126	-0.176681	-0.29388	-0.208837	-0.39047	-0.25336	-0.598803	-0.294129	-0.556704	-0.00703803	0.437363	0.63517	0.416157	0.84364	0.651372	0.0515961	0.0542666	0.0375151	0.0769821	0.73761	0.273303	-0.20256	0.070419	-0.0912726	0.187926	-0.0989503	-0.0865717	-0.0285215	-0.23367	-0.172086	-0.258482	0.0191708	0.0964427
ATAD3A	blue	0.351073	-0.320746	-0.716544	-0.143789	-0.42095	0.374362	0.0968631	0.301277	0.0041396	-0.270365	-0.278984	-0.0107933	-0.131156	-0.0856463	-0.468173	-0.20189	-0.277612	0.165814	0.629133	0.737214	0.393568	0.731109	0.539	0.116877	0.0128091	0.00568408	0.376129	0.548103	0.26474	0.00270616	-0.0716199	-0.189348	0.0682252	-0.302907	-0.203567	-0.0377768	-0.210264	-0.359093	-0.49467	-0.232725	0.0243002
C1orf122	blue	0.23442	-0.476637	-0.700444	-0.294132	-0.575955	0.18136	-0.159481	0.321948	-0.0447285	-0.363926	-0.377262	-0.0521633	-0.142994	-0.202791	-0.555456	-0.349511	-0.298119	0.23474	0.608774	0.561377	0.57229	0.827245	0.697234	0.00343231	0.213279	0.067161	0.315466	0.521584	0.141625	0.253178	0.161485	-0.0971529	0.228941	-0.164158	0.178372	-0.0996743	-0.0334244	-0.229291	-0.214551	-0.286706	-0.109213
UBL5	blue	0.0645879	-0.362205	-0.614498	0.0605536	-0.277514	0.118326	0.038442	0.0761449	-0.0922556	-0.339991	-0.376282	-0.28761	-0.38046	-0.0134867	-0.518139	-0.167436	-0.331339	-0.0762794	0.244318	0.466675	0.415218	0.753594	0.675204	0.203744	-0.0239095	0.0851937	0.292182	0.753172	0.383096	-0.241412	0.0290213	-0.202359	-0.108079	-0.289161	-0.202313	0.0893826	-0.085198	-0.179422	-0.183803	0.068669	0.0329251
MSRB1	blue	0.243356	-0.429609	-0.666934	-0.241639	-0.538052	0.0481278	-0.16613	-0.0306285	-0.242302	-0.516059	-0.504673	-0.289721	-0.164593	-0.230485	-0.560926	-0.249749	-0.166638	0.284742	0.560359	0.497769	0.617248	0.700959	0.554652	0.133128	-0.0531232	0.142722	0.353693	0.445188	0.206041	0.150146	0.0210359	-0.224682	-0.0213915	-0.313508	-0.0423181	0.308939	0.245736	-0.0758729	-0.243135	-0.0803555	0.171643
R3HDM4	blue	0.276709	-0.355217	-0.640895	-0.44497	-0.587695	0.129622	-0.21815	0.0883246	-0.157227	-0.388159	-0.473233	-0.279606	-0.245184	-0.146746	-0.563996	-0.336745	-0.218684	0.4004	0.669099	0.49842	0.574295	0.695747	0.627088	0.031218	-0.0148667	0.0185432	0.303008	0.327715	0.0330861	0.166538	0.190174	0.0151935	0.291949	-0.201755	0.0225792	0.0815884	0.0808153	-0.0757	-0.269353	-0.152915	0.160391
APRT	blue	0.103588	-0.190185	-0.609287	-0.059629	-0.290939	0.346355	0.15693	0.219839	-0.0672159	-0.30409	-0.391499	-0.196028	-0.333152	-0.1988	-0.6107	-0.294538	-0.44906	0.182416	0.593355	0.674455	0.42965	0.825076	0.599881	0.0428483	-0.00507037	0.117998	0.158487	0.63875	0.209139	-0.075809	-0.0251516	-0.23419	0.139546	-0.142705	-0.0429283	-0.0424937	-0.128538	-0.271728	-0.2699	0.0184345	-0.0822026
C9orf37	blue	0.197294	-0.250105	-0.60782	-0.395034	-0.505671	0.253431	-0.102341	0.194316	-0.0965169	-0.146276	-0.235147	-0.0573524	-0.154786	-0.121657	-0.482715	-0.348247	-0.256512	0.220971	0.682726	0.614274	0.545179	0.730774	0.538173	0.0257323	-0.0644797	-0.177586	0.310868	0.367268	0.00619237	0.166932	0.0959964	-0.00189745	0.13527	-0.07219	-0.0543883	0.0330776	0.00174207	-0.30098	-0.325666	-0.248685	-0.102108
PFDN6	blue	0.0771564	-0.324594	-0.684482	0.14197	-0.219607	0.44073	0.213017	0.378613	0.18986	-0.47279	-0.438961	-0.132484	-0.367228	-0.305509	-0.531636	-0.0551297	-0.268574	0.038027	0.466367	0.716957	0.24134	0.786409	0.540555	0.112152	0.105889	0.271365	0.370151	0.791724	0.492099	-0.136837	0.0377719	-0.294019	0.0518994	-0.265718	-0.22802	-0.196408	-0.317991	-0.321184	-0.364034	-0.140919	-0.0976017
OXLD1	blue	0.162325	-0.476415	-0.716549	0.0123122	-0.365005	0.325699	0.0175021	0.349648	0.159121	-0.531102	-0.41591	0.0492804	-0.0327306	-0.209245	-0.408063	-0.0194878	-0.0873208	0.130329	0.528868	0.686301	0.277883	0.748711	0.520977	0.231002	0.188654	0.356073	0.515766	0.663706	0.48007	0.0906581	-0.114042	-0.353162	0.00488685	-0.439133	-0.106154	-0.234719	-0.206639	-0.410478	-0.35277	-0.242775	-0.245863
RNF5	blue	0.0307698	-0.0406321	-0.4785	0.00396448	-0.152004	0.453045	0.275195	0.259096	0.0490379	-0.213003	-0.293218	-0.171517	-0.365633	-0.0346689	-0.500404	-0.214987	-0.415992	0.0966835	0.57497	0.706955	0.373614	0.783838	0.554381	-0.0337412	0.0046379	-0.107231	0.131114	0.676674	0.242929	-0.15887	-0.0189301	-0.208846	0.0353024	-0.115067	-0.189194	-0.0353425	-0.212566	-0.384781	-0.412148	-0.0773945	-0.0888985
NELFE	blue	0.201201	-0.343979	-0.70826	0.0659258	-0.304184	0.363755	0.193161	0.318767	0.0437508	-0.333765	-0.319629	-0.106247	-0.252441	-0.0895786	-0.497373	-0.126869	-0.346503	0.0484229	0.487727	0.724508	0.332623	0.797674	0.679108	0.206137	0.104835	0.0938844	0.347181	0.78102	0.441933	-0.135388	-0.0191523	-0.22708	0.10793	-0.306324	-0.251765	-0.0789757	-0.343813	-0.318245	-0.474592	-0.0657866	0.112519
C11orf83	blue	0.10947	-0.134288	-0.587732	-0.0532556	-0.25684	0.335781	0.170662	0.187733	-0.0727474	-0.234244	-0.403462	-0.29515	-0.505149	-0.213784	-0.630549	-0.320951	-0.498433	0.0191394	0.533388	0.626229	0.475484	0.796715	0.600674	-0.00676067	-0.165727	-0.138503	0.100479	0.625563	0.149306	-0.192777	0.221186	-0.0430249	0.00622746	0.0142349	-0.0915545	0.0174835	-0.166522	-0.214401	-0.278273	-0.0558182	-0.00010135
PSENEN	blue	0.129882	-0.48023	-0.725891	-0.0139305	-0.370827	0.157698	-0.0149143	-0.0194863	-0.0562136	-0.564582	-0.568271	-0.367465	-0.355872	-0.084851	-0.48612	-0.011111	-0.0684414	-0.0812712	0.358271	0.563109	0.450014	0.721476	0.647388	0.128654	-0.0251606	0.0973374	0.502956	0.643528	0.42832	-0.0899115	0.0954457	-0.122701	-0.176198	-0.464816	-0.367816	0.191305	-0.0815469	-0.152174	-0.390474	-0.115216	0.235035
PSMB10	blue	0.249916	-0.465415	-0.763193	-0.310205	-0.615976	0.0681242	-0.188695	0.101301	-0.268977	-0.419134	-0.49	-0.245369	-0.287016	-0.327778	-0.750205	-0.46535	-0.410141	0.270737	0.586144	0.516614	0.673276	0.87039	0.757578	0.120929	0.176741	0.121981	0.261741	0.53659	0.0938651	0.209259	0.168158	-0.0768241	0.282778	-0.109312	0.177817	0.0452773	0.100661	-0.129379	-0.122719	-0.0028733	-0.00322319
TMEM256	blue	0.124043	-0.46568	-0.773913	-0.0712475	-0.440047	0.206527	0.0120599	0.164211	-0.109481	-0.418582	-0.480213	-0.272562	-0.376902	-0.181712	-0.607109	-0.264668	-0.373216	-0.0262527	0.471898	0.636983	0.558428	0.909776	0.796823	0.114489	0.0129405	0.0574953	0.312833	0.72244	0.294428	-0.0323033	0.148544	-0.130475	0.101081	-0.233053	-0.122054	0.0850047	-0.112957	-0.220407	-0.312132	-0.0832475	0.0705569
ZNF580	blue	0.356862	-0.275744	-0.709727	-0.294568	-0.50614	0.273346	-0.0631672	0.177364	-0.1207	-0.257563	-0.28414	-0.108678	-0.23493	-0.057276	-0.606196	-0.377629	-0.380219	0.318183	0.718976	0.652832	0.535896	0.767338	0.559769	0.136123	-0.010549	-0.045604	0.351837	0.482848	0.103227	0.0309221	0.00851791	-0.145363	-0.0654941	-0.203236	-0.141828	0.0693772	-0.0399641	-0.389882	-0.426211	-0.119089	-0.0572314
C8orf82	blue	0.164205	-0.196383	-0.634796	-0.43791	-0.56771	0.186162	-0.11245	0.0483086	-0.297561	-0.219223	-0.422885	-0.339878	-0.414926	-0.290497	-0.718212	-0.557892	-0.472086	0.354906	0.724122	0.55883	0.680666	0.762039	0.552068	0.0413115	-0.190654	-0.150915	0.101245	0.316167	-0.145476	0.166645	0.205628	0.0453436	0.19937	0.0304768	-0.0482713	0.269317	0.175851	-0.216638	-0.332309	-0.0618508	0.0683304
NDUFS3	blue	0.191394	-0.427472	-0.625335	-0.0948542	-0.433489	0.0956683	-0.013877	0.127008	-0.154257	-0.203795	-0.145208	0.032034	-0.0379069	-0.110305	-0.408509	-0.302463	-0.366611	-0.0807959	0.27524	0.472795	0.449716	0.766187	0.61768	0.176855	-0.038232	-0.0424142	0.283157	0.702101	0.30832	0.130518	-0.0659437	-0.218286	0.189922	-0.129024	0.126353	0.00485262	0.0318001	-0.211517	-0.205013	-0.256071	-0.0643002
MRPL23	blue	0.219139	-0.475911	-0.798458	-0.265179	-0.592368	0.13323	-0.128851	0.134725	-0.200447	-0.354281	-0.443389	-0.228357	-0.32362	-0.240908	-0.683052	-0.418969	-0.398509	0.074241	0.550443	0.585079	0.659503	0.885348	0.759413	0.143079	0.0467705	-0.0559621	0.311059	0.580861	0.123724	0.11973	0.244319	-0.00160857	0.133385	-0.0974915	-0.0171621	0.112403	0.00207527	-0.212421	-0.283986	-0.120262	0.0327784
FIS1	blue	0.0423559	-0.112022	-0.514156	0.124141	-0.122965	0.58141	0.343485	0.598771	0.290208	-0.206209	-0.266252	0.0237406	-0.304771	-0.188803	-0.450536	-0.166154	-0.441214	0.0739048	0.554958	0.760311	0.209209	0.797725	0.573976	-0.0876401	0.171332	0.0647138	0.108997	0.73094	0.299437	-0.0782452	0.0321542	-0.225326	0.157161	-0.0863715	-0.0909337	-0.350711	-0.489258	-0.40838	-0.367426	-0.177417	-0.203805
PAM16	blue	0.260805	-0.534128	-0.825809	-0.133261	-0.508196	0.290022	-0.0557477	0.335861	0.0686125	-0.499282	-0.458693	-0.0739042	-0.205433	-0.191995	-0.543391	-0.168776	-0.203025	0.152812	0.598358	0.707406	0.433838	0.880395	0.73619	0.181296	0.173135	0.189663	0.516821	0.710228	0.393277	0.0621084	0.0935859	-0.168271	0.127842	-0.38378	-0.117257	-0.16808	-0.222169	-0.319368	-0.366708	-0.2594	-0.0791032
ZNF579	blue	0.124081	-0.080986	-0.585663	-0.0647453	-0.261013	0.461042	0.240111	0.258114	-0.01175	-0.136982	-0.311847	-0.265501	-0.501963	-0.240964	-0.568864	-0.282435	-0.466895	0.0969346	0.627065	0.72079	0.378536	0.70769	0.511077	-0.0447418	-0.0882743	-0.0809685	0.0978707	0.481377	0.0939955	-0.239505	0.180654	-0.0379718	0.0639925	-0.0502112	-0.354465	0.117091	-0.264403	-0.251441	-0.52162	-0.0735951	0.214858
ENTPD3-AS1	blue	0.197384	-0.338472	-0.663328	-0.270127	-0.453749	0.263564	-0.115072	0.317117	0.069053	-0.341408	-0.428031	-0.150562	-0.374838	-0.185345	-0.592453	-0.317633	-0.283618	0.190439	0.581621	0.541409	0.439137	0.744132	0.657572	0.120517	0.149512	-0.0356924	0.317485	0.48228	0.0813489	0.109043	0.316866	0.108868	0.169379	-0.0445695	0.0202697	-0.216174	-0.241524	-0.335309	-0.263625	-0.161775	-0.184374
CERS1	blue	0.267578	-0.142549	-0.616936	-0.204876	-0.399404	0.23089	0.0608731	0.0377351	-0.239487	-0.158493	-0.314129	-0.301372	-0.435357	-0.0699277	-0.65224	-0.431904	-0.498621	0.167552	0.566057	0.576228	0.595319	0.727789	0.502643	-0.0367587	-0.120172	-0.139689	0.122853	0.4695	0.0198192	-0.135159	-0.049183	-0.121276	0.00625908	-0.0804074	-0.168317	0.351969	0.0989049	-0.300977	-0.39556	0.0567964	0.0760851
C17orf89	blue	0.1722	-0.352318	-0.653463	-0.470177	-0.652588	0.00625038	-0.282111	0.0415044	-0.333798	-0.295532	-0.473875	-0.365132	-0.408704	-0.324409	-0.76848	-0.581463	-0.463702	0.39218	0.63948	0.40198	0.744685	0.814515	0.768625	0.0553659	0.101156	-0.0171683	0.113089	0.380789	-0.112365	0.221695	0.349905	0.136308	0.33739	0.0285704	0.232267	0.131416	0.189068	-0.0277915	-0.075825	-0.00501161	0.082449
FAM195B	blue	0.248987	-0.27623	-0.702083	-0.150767	-0.359169	0.319026	0.0501011	0.090982	-0.0667765	-0.451382	-0.61284	-0.401047	-0.518157	-0.173896	-0.617584	-0.196052	-0.246869	0.123168	0.670433	0.685814	0.523661	0.777128	0.650339	0.0978135	-0.0733679	-0.0412783	0.310467	0.497116	0.15166	-0.0894083	0.287567	0.0174384	-0.111691	-0.244883	-0.270805	0.0818629	-0.176318	-0.277517	-0.402801	-0.0818927	0.0657037
C19orf24	blue	0.178383	-0.3103	-0.737818	-0.0705168	-0.400611	0.429799	0.115358	0.366046	0.0606385	-0.381932	-0.423062	-0.126741	-0.34612	-0.368695	-0.628307	-0.252004	-0.370761	0.225624	0.696106	0.770806	0.392802	0.840377	0.557695	0.0141959	0.0631542	0.207684	0.299612	0.64993	0.2818	-0.081236	0.127183	-0.191599	0.152572	-0.190707	-0.15178	-0.113686	-0.238492	-0.278369	-0.36	-0.174336	-0.0492324
ZNF688	blue	0.343054	-0.450743	-0.754268	-0.303798	-0.541605	0.149769	-0.198991	0.175996	-0.069396	-0.30716	-0.361205	-0.120632	-0.222614	0.0129622	-0.522115	-0.292387	-0.219639	0.139948	0.565575	0.546961	0.5396	0.757467	0.646135	0.142682	0.0194863	-0.0423425	0.47101	0.47871	0.140058	0.011598	0.131455	-0.00283922	-0.0564931	-0.231317	-0.0809375	-0.0163228	-0.0499868	-0.343303	-0.277018	-0.164738	-0.166949
PET100	blue	0.155856	-0.193604	-0.572924	-0.180473	-0.376934	0.23963	0.0441503	0.226705	-0.101706	-0.259156	-0.375775	-0.23356	-0.372046	-0.135658	-0.64388	-0.429427	-0.502885	0.183627	0.509069	0.54945	0.497627	0.812289	0.694554	0.146981	-0.0248689	-0.0592852	0.117993	0.608459	0.103907	0.00392493	0.112234	-0.136949	0.186902	0.00624329	0.0396035	-0.011886	-0.0536725	-0.210203	-0.233502	0.00751044	-0.0251255
Z83851.1	blue	0.307186	-0.464647	-0.68858	-0.243337	-0.502563	0.227308	-0.115064	0.29949	0.0442284	-0.414038	-0.398119	-0.100687	-0.200062	-0.108345	-0.46487	-0.231768	-0.188861	0.172053	0.515574	0.551148	0.412973	0.75623	0.687976	0.161128	0.216189	0.0877806	0.412051	0.552216	0.24799	0.150478	0.18884	-0.0841195	0.341876	-0.268055	-0.0423156	-0.178941	-0.128429	-0.287992	-0.312248	-0.271203	-0.0991745
CISD3	blue	0.134336	-0.315891	-0.620458	-0.25017	-0.453881	0.123335	-0.117354	0.0717379	-0.19602	-0.430964	-0.610508	-0.438196	-0.514008	-0.369395	-0.745596	-0.377193	-0.409604	0.282831	0.609253	0.468792	0.618919	0.809236	0.713854	0.00521433	0.0985726	0.0518595	0.118549	0.511404	0.0707168	0.0483293	0.392085	0.154588	0.281423	-0.0295431	0.192071	-0.0457183	-0.0212055	0.0102384	-0.0242256	0.0332357	0.0644576
GS1-124K5.4	blue	0.112075	-0.346389	-0.615077	-0.249851	-0.501066	0.101182	-0.156975	0.136679	-0.1743	-0.241375	-0.324506	-0.184333	-0.275518	-0.298023	-0.608721	-0.415198	-0.406306	0.254186	0.492375	0.438681	0.509147	0.720618	0.495311	0.0822358	0.0201857	0.146456	0.193303	0.463423	0.0890496	0.0113245	0.059026	-0.0741935	0.250129	-0.0870949	0.0694485	0.07106	0.122665	-0.180304	-0.158495	-0.111762	-0.0753543
RPP21	blue	0.0663624	-0.156945	-0.625562	-0.0762463	-0.277258	0.399411	0.185629	0.210222	-0.0262576	-0.26773	-0.466319	-0.348766	-0.583685	-0.183122	-0.660673	-0.318259	-0.468433	-0.00429466	0.55699	0.704868	0.457303	0.842891	0.681619	0.120603	-0.0822681	-0.146367	0.153098	0.646507	0.146537	-0.175021	0.29758	0.0256478	0.0568471	-0.0398232	-0.278794	-0.0124243	-0.279603	-0.255005	-0.337442	0.00908608	0.0401786
ATP5J2	blue	-0.0249743	-0.232282	-0.569141	-0.0561852	-0.358073	0.111171	0.0461425	0.0462625	-0.281971	-0.243746	-0.40099	-0.37377	-0.478107	-0.354737	-0.719922	-0.44018	-0.593835	0.108306	0.392977	0.463162	0.558657	0.802276	0.609897	-0.00531321	-0.0994104	0.0652468	-0.0152173	0.63747	0.133223	-0.0632562	0.117845	-0.108465	0.160528	0.0339808	0.0239978	0.176846	0.0627098	0.0101478	-0.0788183	0.171258	0.16887
RP6-109B7.3	blue	0.11834	-0.369929	-0.661493	-0.233652	-0.508975	0.103902	-0.105641	0.182743	-0.178189	-0.155106	-0.200621	-0.0295178	-0.144374	-0.088862	-0.534988	-0.438845	-0.448973	0.0454695	0.411218	0.466132	0.556028	0.740152	0.643288	0.0630262	0.0443691	-0.0993752	0.209209	0.513472	0.0799352	0.153948	-0.0232938	-0.0984096	0.174257	-0.0426383	0.0557694	0.0994251	0.0296298	-0.210475	-0.191516	-0.0968725	-0.0195419
MRPL20	blue	0.177276	-0.277055	-0.585417	-0.00798859	-0.341864	0.240617	0.114669	0.280988	-0.0772468	-0.114459	-0.105771	0.00718045	-0.132998	-0.0882282	-0.474787	-0.318786	-0.522928	0.0778089	0.395274	0.581429	0.358259	0.779638	0.579264	0.183738	-0.0302888	0.0310021	0.183833	0.763688	0.325525	-0.158695	-0.113098	-0.232432	0.159665	-0.141038	-0.0321852	-0.0465013	-0.140787	-0.233282	-0.255094	-0.0416795	0.00350425
C4orf48	blue	0.0984529	-0.13131	-0.538425	-0.136284	-0.343171	0.3353	0.114397	0.333379	-0.0748885	-0.10552	-0.308458	-0.18265	-0.432657	-0.305598	-0.648482	-0.454481	-0.604849	0.147911	0.576277	0.592133	0.480492	0.773741	0.567946	-0.120329	-0.00660709	-0.0734726	-0.0612396	0.488609	-0.0125344	-0.00727769	0.1879	-0.0184924	0.229805	0.134809	0.0358622	-0.0447201	-0.174854	-0.161699	-0.258518	-0.0386208	0.0494203
TMEM141	blue	0.0152622	-0.186483	-0.569446	0.141931	-0.165917	0.549535	0.313922	0.516485	0.207251	-0.309081	-0.342588	0.00490497	-0.270596	-0.423888	-0.515295	-0.139116	-0.394167	0.0916915	0.579546	0.784725	0.234268	0.810872	0.461322	-0.0472703	0.135277	0.280086	0.143201	0.707966	0.353548	-0.0279668	-0.0472958	-0.319406	0.217163	-0.1372	-0.0209494	-0.303531	-0.336783	-0.363016	-0.332824	-0.190356	-0.239571
CHCHD10	blue	-0.0194677	-0.222718	-0.498006	-0.336906	-0.534842	0.0177185	-0.111381	0.0392703	-0.406919	-0.140528	-0.376925	-0.39433	-0.447126	-0.466976	-0.758811	-0.649277	-0.63623	0.255893	0.459386	0.337746	0.647449	0.697518	0.575138	-0.0188168	-0.00350857	-0.0254518	-0.191761	0.322342	-0.187577	0.133251	0.316477	0.141983	0.574376	0.249077	0.246657	0.222222	0.194131	0.197697	0.0463976	0.125923	0.2757
MEF2BNB	blue	-0.0259428	-0.160046	-0.503175	0.0221053	-0.196539	0.511801	0.234957	0.482398	0.225546	-0.252807	-0.270817	0.0612735	-0.237356	-0.394037	-0.450129	-0.139575	-0.31703	0.117376	0.578905	0.716274	0.227964	0.743078	0.392233	-0.190069	0.123519	0.123086	0.160751	0.623024	0.282423	-0.0178461	0.029415	-0.176561	0.274037	-0.0556886	-0.0369794	-0.317993	-0.333174	-0.318129	-0.325819	-0.327683	-0.210503
RP11-111M22.3	blue	0.184347	-0.464888	-0.689782	-0.456962	-0.693286	-0.034222	-0.315502	-0.0231989	-0.35888	-0.319288	-0.397871	-0.287991	-0.246945	-0.220404	-0.651961	-0.518058	-0.356015	0.307709	0.58143	0.426323	0.718058	0.802956	0.690712	0.15245	0.00669462	0.00684377	0.264096	0.419217	-0.00513749	0.221532	0.255721	0.0431096	0.287478	-0.108605	0.0988872	0.22378	0.264711	-0.0862529	-0.136403	-0.0581238	0.0783226
SNHG9	blue	0.241691	-0.430599	-0.6785	-0.319706	-0.55734	0.167065	-0.192129	0.249293	-0.0173737	-0.441578	-0.40661	-0.111519	-0.182799	-0.118493	-0.546529	-0.320196	-0.21532	0.295632	0.562078	0.526517	0.52118	0.778181	0.649862	0.0993912	0.0934858	0.0918568	0.424601	0.527327	0.181452	0.174225	0.0675649	-0.194765	0.132662	-0.228883	-0.00358456	0.02058	0.0680078	-0.276039	-0.296716	-0.261241	-0.0848497
PRR24	blue	0.060512	-0.12788	-0.614516	-0.0478469	-0.302386	0.366265	0.206423	0.190158	-0.110545	-0.13121	-0.302744	-0.273468	-0.482121	-0.230258	-0.611344	-0.322393	-0.544248	0.1114	0.552902	0.672721	0.383165	0.718253	0.532898	-0.0143215	-0.125763	-0.00181029	0.0613433	0.543253	0.14211	-0.277141	0.0333087	-0.0757776	0.163784	-0.075218	-0.309387	0.165452	-0.226421	-0.133108	-0.425329	0.0782679	0.337902
C17orf49	blue	-0.016261	-0.200248	-0.482135	-0.0586431	-0.273808	0.28305	0.100209	0.313953	-0.00296313	-0.20882	-0.341573	-0.117047	-0.282602	-0.255922	-0.477551	-0.256737	-0.397839	0.119932	0.498294	0.551549	0.379991	0.714134	0.53619	-0.198391	0.0466217	0.0138905	0.0399467	0.519871	0.125551	0.0675554	0.109116	-0.0508469	0.264504	0.0108265	0.0482656	-0.132486	-0.23283	-0.121086	-0.152385	0.00032437	0.0155215
MRPL12	blue	-0.025008	-0.230355	-0.645031	-0.0197414	-0.335198	0.306206	0.165612	0.194614	-0.16034	-0.250831	-0.383145	-0.24146	-0.420796	-0.432861	-0.692843	-0.354312	-0.57152	0.130947	0.578958	0.673157	0.516388	0.873603	0.582252	-0.118563	-0.0541336	0.096449	0.0429559	0.682524	0.207962	-0.105559	0.0887944	-0.122756	0.242075	0.00189518	0.03689	0.0403169	-0.0985204	-0.0737249	-0.173406	0.0472286	0.111624
FDX1L	blue	0.0726751	-0.228742	-0.580698	-0.0535638	-0.33231	0.306232	0.101425	0.316486	-0.0409322	-0.250476	-0.369001	-0.166812	-0.377507	-0.456709	-0.651068	-0.356886	-0.512103	0.167503	0.517913	0.575197	0.382904	0.774397	0.534783	0.0237589	0.131358	0.217437	0.0609666	0.590085	0.166349	-0.106062	0.173078	-0.0948559	0.362921	0.000137431	0.115547	-0.156706	-0.130765	-0.12207	-0.100596	0.0122599	-0.0899314
LIN37	blue	0.323237	-0.425913	-0.695169	-0.181675	-0.442571	0.207104	-0.0468538	0.187214	-0.031771	-0.232906	-0.155212	-0.000720052	-0.0898398	0.160219	-0.386369	-0.222065	-0.21524	-0.0314201	0.428083	0.584056	0.423543	0.704447	0.616458	0.33767	0.0785801	-0.135193	0.516502	0.576723	0.254899	-0.0392244	0.00230503	-0.153165	-0.093493	-0.288664	-0.227629	0.0402817	-0.115984	-0.447039	-0.452778	-0.194354	-0.0825713
NDUFA7	blue	0.0218241	-0.347107	-0.603738	-0.252567	-0.50771	0.0234927	-0.0880065	-0.0295667	-0.353022	-0.136327	-0.231661	-0.201884	-0.223287	-0.124972	-0.549863	-0.463729	-0.460115	0.0124979	0.354123	0.447447	0.619976	0.786918	0.63835	0.0717676	-0.146162	-0.14053	0.129848	0.541007	0.0711597	0.104422	0.0141469	-0.0663989	0.286819	-0.0214787	0.019444	0.255747	0.187228	-0.0777551	-0.157883	-0.0319764	0.112568
RAB11B-AS1	blue	0.278694	-0.488559	-0.64527	-0.20166	-0.503344	0.225244	-0.128276	0.410756	0.0979979	-0.294352	-0.133583	0.254783	0.145797	-0.110825	-0.344251	-0.227289	-0.16179	0.141116	0.494543	0.560081	0.365308	0.712566	0.521354	0.178182	0.246941	0.100605	0.455695	0.515793	0.246859	0.350605	-0.0757242	-0.276255	0.112395	-0.210744	0.0941822	-0.219579	-0.0853381	-0.439457	-0.318696	-0.415648	-0.323661
AC018755.16	blue	0.0662559	-0.110778	-0.503791	-0.0937848	-0.294222	0.28422	0.146647	0.21993	-0.156486	-0.0041406	-0.162663	-0.0955497	-0.30088	-0.204756	-0.526012	-0.39304	-0.565408	0.0808795	0.503404	0.575921	0.4641	0.733584	0.534886	-0.0814491	-0.0520632	-0.121304	-0.0119535	0.503957	0.0423493	-0.0947063	0.0168409	-0.119816	0.128719	0.0165538	-0.0695578	0.0542666	-0.106184	-0.244037	-0.330445	-0.0545182	0.0292683
NCBP2-AS2	blue	0.0520851	-0.0367298	-0.42762	0.0399424	-0.16335	0.47092	0.263567	0.464071	0.139777	-0.0942143	-0.15959	0.0272243	-0.216212	-0.169444	-0.445759	-0.247414	-0.482352	0.208027	0.559799	0.676135	0.234119	0.731837	0.390047	-0.154405	-0.0931065	0.127728	0.0428866	0.651795	0.245512	-0.18218	-0.162652	-0.338821	0.116345	-0.0676982	-0.060985	-0.178807	-0.247756	-0.275277	-0.256244	-0.137198	-0.146465
RP11-140K17.3	blue	0.288132	-0.309258	-0.641974	-0.492328	-0.618012	-0.0103214	-0.287722	-0.0373601	-0.343974	-0.213855	-0.408449	-0.355723	-0.436315	-0.212511	-0.724489	-0.590263	-0.451423	0.206358	0.523062	0.342997	0.7372	0.728243	0.653446	0.16886	-0.0948736	-0.226392	0.149445	0.312906	-0.175524	0.14403	0.353355	0.198304	0.195845	0.133162	0.216053	0.190946	0.231978	-0.0743919	-0.107263	-0.0363018	0.0180877
DPM1	brown	-0.0645482	-0.358892	-0.0763777	0.471278	0.195978	0.0195474	0.108113	0.0470306	0.35604	-0.424164	-0.110997	0.110327	0.228113	0.292616	0.427788	0.69412	0.527217	-0.323075	-0.247899	0.0987185	-0.279118	0.0244321	0.158142	-0.0199305	0.0826241	0.279865	0.458232	0.423908	0.73568	-0.208857	-0.256691	-0.338641	-0.344558	-0.638059	-0.312785	-0.139034	-0.353683	-0.00717577	-0.135002	-0.23241	0.15459
CDC27	brown	-0.0943182	-0.0363382	0.214753	0.665145	0.511634	0.224479	0.339201	0.227754	0.582619	-0.323701	0.0523223	0.379939	0.445685	0.0697206	0.604701	0.850348	0.615954	-0.185677	-0.266268	0.0505116	-0.644861	-0.315535	-0.325855	0.0162372	0.236974	0.479368	0.339179	0.190953	0.688832	-0.0115819	-0.368092	-0.487513	-0.430864	-0.534759	-0.24518	-0.443417	-0.430012	-0.205744	-0.169839	-0.231571	-0.20497
RPAP3	brown	-0.168924	0.159512	0.453843	0.627977	0.597536	0.0397941	0.336372	0.051386	0.366468	0.0871447	0.280896	0.302767	0.309562	0.12093	0.612817	0.640227	0.362362	-0.364712	-0.49521	-0.206748	-0.623079	-0.477311	-0.430381	-0.14778	0.0565861	0.126492	-0.0479879	0.0133662	0.382816	-0.263622	-0.229257	-0.105972	-0.324473	-0.0825322	-0.08579	-0.286872	-0.403485	0.127631	0.11316	0.0609584	0.0793017
VTA1	brown	-0.19498	0.0407593	0.239914	0.759444	0.605827	0.240034	0.403437	0.227533	0.613347	-0.284213	0.00448107	0.289911	0.2499	0.0603363	0.51261	0.838195	0.505906	-0.300923	-0.34132	0.0546082	-0.657427	-0.248281	-0.316673	-0.105136	0.0413034	0.447972	0.242212	0.314421	0.72255	-0.288475	-0.404766	-0.457275	-0.565241	-0.483201	-0.296175	-0.407144	-0.49525	-0.143751	-0.0980449	-0.18465	-0.18156
MAP4K3	brown	-0.0477924	-0.285421	0.0421114	0.364704	0.206272	-0.0260584	-0.0116961	-0.0361178	0.365365	-0.556443	-0.262679	0.0364277	0.248838	0.110077	0.461109	0.767466	0.790153	-0.143092	-0.204142	-0.033265	-0.3415	-0.235994	-0.121732	0.012695	0.138947	0.466154	0.497829	0.0489333	0.566012	0.0381365	-0.142444	-0.335037	-0.513119	-0.691106	-0.349929	-0.0715923	-0.143856	-0.0237621	-0.167033	-0.264214	0.0621088
SLC30A9	brown	-0.37876	0.293207	0.569285	0.618843	0.721961	0.129696	0.381452	0.131407	0.474154	0.0620753	0.287028	0.390144	0.363974	0.11537	0.661988	0.674654	0.42857	-0.277822	-0.402198	-0.194052	-0.648358	-0.470897	-0.427358	-0.234582	0.268697	0.131756	-0.091938	-0.0227298	0.346897	-0.0653004	-0.277309	-0.213542	-0.278726	-0.0659639	-0.0298866	-0.408094	-0.380782	-0.122715	0.0034486	-0.0602019	-0.21883
MATR3	brown	0.0086526	-0.354804	-0.00367569	0.488273	0.274253	0.00566974	0.0619351	0.102068	0.504517	-0.353093	0.0251112	0.294262	0.332881	0.32037	0.540758	0.771889	0.636022	-0.50272	-0.43343	-0.0411317	-0.460016	-0.165357	0.0280316	0.230291	0.292793	0.155277	0.572839	0.320653	0.710528	-0.122829	-0.0873487	-0.130538	-0.407413	-0.506749	-0.275576	-0.390827	-0.479563	-0.165087	-0.18077	-0.313313	-0.0808561
RUFY3	brown	-0.117811	-0.112499	0.0140267	0.70983	0.499825	0.444877	0.467692	0.45383	0.769682	-0.292918	0.0801125	0.458987	0.293214	0.153156	0.534465	0.826717	0.515612	-0.423487	-0.215339	0.304513	-0.630039	-0.0733867	-0.122344	0.0216804	0.30047	0.314161	0.462139	0.431241	0.775876	-0.134173	-0.323188	-0.456554	-0.418476	-0.531379	-0.474113	-0.508739	-0.681688	-0.477819	-0.481638	-0.406828	-0.283823
AGPS	brown	-0.212125	-0.036693	0.20755	0.475283	0.422033	0.291181	0.22379	0.445771	0.714444	-0.311092	0.0138167	0.486783	0.395974	-0.0823701	0.476106	0.720713	0.609403	-0.117911	-0.115978	0.0899983	-0.560464	-0.221375	-0.310559	-0.17088	0.432253	0.419171	0.319933	0.103214	0.495028	0.182785	-0.204275	-0.311859	-0.354743	-0.336366	-0.0566591	-0.630376	-0.473012	-0.334447	-0.172858	-0.429896	-0.472306
SPAST	brown	-0.0734036	-0.223618	0.0653199	0.382487	0.286611	0.24717	0.112489	0.430632	0.73039	-0.47411	-0.0971386	0.428405	0.409407	0.0616693	0.493108	0.740976	0.740685	-0.088713	-0.0826297	0.118012	-0.513177	-0.137106	-0.129059	-0.0116575	0.521771	0.460296	0.531469	0.155139	0.561272	0.198097	-0.145426	-0.356664	-0.252316	-0.497531	-0.153522	-0.606554	-0.443525	-0.434532	-0.286977	-0.510285	-0.502631
AKAP11	brown	-0.318084	0.0929054	0.397428	0.456627	0.554905	0.170014	0.206248	0.160945	0.604845	-0.253139	-0.0291286	0.210934	0.235021	0.120144	0.603552	0.810725	0.727027	-0.14017	-0.223305	-0.0887992	-0.617053	-0.400585	-0.332198	-0.264786	0.345679	0.34002	0.200708	-0.0911586	0.389643	-0.0748614	-0.100013	-0.157314	-0.260579	-0.31995	-0.211829	-0.441996	-0.412534	-0.124485	-0.0695232	-0.171202	-0.220016
HSF2	brown	-0.0116977	-0.129511	0.172184	0.562642	0.452699	0.068698	0.235731	0.0156209	0.461425	-0.180578	0.131892	0.279799	0.325836	0.362433	0.689048	0.804489	0.640727	-0.498507	-0.434524	-0.0623785	-0.535796	-0.323921	-0.1885	0.0765158	0.0234328	0.101582	0.393256	0.167013	0.606373	-0.1854	-0.215363	-0.201799	-0.471742	-0.488286	-0.388718	-0.228183	-0.403993	-0.151981	-0.184299	-0.340263	-0.058088
TBPL1	brown	-0.100043	-0.191371	-0.0820274	0.683029	0.388911	0.212973	0.300102	0.103579	0.467765	-0.553789	-0.29248	-0.0532026	-0.04997	-0.0234648	0.24385	0.771586	0.450287	-0.254294	-0.206592	0.172313	-0.460122	-0.052384	-0.0731302	0.0124131	0.0401569	0.572306	0.412022	0.426044	0.786152	-0.340593	-0.130161	-0.38897	-0.553182	-0.635336	-0.497773	-0.263427	-0.486439	-0.0542089	-0.192853	-0.0596363	0.0725198
CUL3	brown	-0.201638	0.185632	0.331644	0.691932	0.645597	0.2112	0.437956	0.043441	0.441916	-0.159891	0.0564448	0.190884	0.242347	0.0444058	0.519812	0.773525	0.502393	-0.299596	-0.315431	0.00453181	-0.620377	-0.376523	-0.379843	-0.0135117	0.162254	0.328372	0.137731	0.104136	0.548564	-0.237333	-0.280151	-0.341862	-0.516609	-0.393984	-0.355824	-0.251731	-0.358577	-0.108851	-0.151967	-0.0754513	-0.0665319
SKIV2L2	brown	-0.0607531	0.0970171	0.488713	0.489547	0.567208	0.037622	0.241944	0.0483432	0.46383	-0.0355491	0.202893	0.332372	0.348291	0.360776	0.773102	0.704497	0.58662	-0.452566	-0.550955	-0.255011	-0.64774	-0.517114	-0.399662	-0.0179338	-0.0265233	0.034441	0.0748287	-0.086184	0.346717	-0.0555014	-0.226006	-0.162211	-0.340172	-0.263034	-0.146601	-0.347291	-0.352032	-0.0282768	0.0156478	-0.251401	-0.131001
GOPC	brown	-0.0962509	-0.110358	0.255216	0.482709	0.444757	0.10795	0.15493	0.15481	0.586264	-0.205214	0.141274	0.411123	0.391758	0.257938	0.733261	0.813434	0.750223	-0.415016	-0.383539	-0.0788108	-0.576962	-0.366957	-0.312731	-0.0439439	0.094513	0.151345	0.413996	0.0312633	0.496493	0.0295366	-0.139484	-0.210324	-0.540593	-0.419451	-0.297314	-0.374056	-0.390219	-0.254968	-0.198741	-0.453699	-0.280723
FNIP2	brown	-0.113116	0.121202	0.146187	0.591002	0.512711	0.464944	0.426025	0.352562	0.681462	-0.443433	-0.231992	0.123684	0.0754856	-0.0553734	0.357921	0.769619	0.524224	0.0309108	0.0578223	0.287708	-0.552648	-0.151358	-0.282969	-0.247794	0.0720454	0.544812	0.267817	0.190575	0.59457	-0.152872	-0.265586	-0.525293	-0.523912	-0.566233	-0.482393	-0.366627	-0.502603	-0.245129	-0.373882	-0.219591	-0.112096
AP5M1	brown	-0.249995	0.0175922	0.219436	0.57107	0.520727	0.331141	0.325673	0.372794	0.712186	-0.390196	-0.0974581	0.345755	0.25853	-0.0901647	0.455113	0.775573	0.586017	-0.185691	-0.165746	0.11909	-0.582284	-0.180276	-0.295501	-0.14318	0.231858	0.389961	0.284502	0.221918	0.590571	0.0264515	-0.216641	-0.374255	-0.32635	-0.324481	-0.181466	-0.568491	-0.475573	-0.271422	-0.185202	-0.375694	-0.373817
RC3H2	brown	-0.171423	0.224222	0.48304	0.45673	0.599345	0.0720931	0.206817	0.014235	0.476661	-0.142752	0.0367469	0.0817542	0.10879	0.184936	0.586001	0.693896	0.569426	-0.102104	-0.324775	-0.248002	-0.625913	-0.522421	-0.401355	-0.118058	0.0418183	0.249944	0.0718961	-0.124307	0.296987	-0.22258	-0.0215583	-0.1089	-0.419117	-0.236778	-0.240864	-0.277185	-0.304317	0.0435382	0.0741254	-0.0254314	-0.0713587
ATG5	brown	-0.0188443	-0.13734	0.0254124	0.477649	0.357373	0.0529714	0.159663	-0.106572	0.320379	-0.357173	-0.155895	-0.0568366	-0.00972293	0.278747	0.357057	0.694179	0.503978	-0.327022	-0.203113	0.045701	-0.290138	-0.101981	0.0165169	-0.0703881	-0.0364277	0.103588	0.40357	0.274871	0.571402	-0.317417	-0.00384181	-0.105598	-0.708848	-0.484933	-0.452283	-0.113751	-0.392721	-0.0693953	-0.188133	-0.0754907	0.136012
ATP11B	brown	-0.282551	0.367782	0.573543	0.557739	0.729595	0.290157	0.424673	0.215526	0.621903	0.00621859	0.0562641	0.123997	0.0189628	0.077571	0.58762	0.693101	0.454476	-0.226694	-0.298207	-0.111753	-0.705286	-0.494335	-0.456868	-0.246865	-0.000205956	0.133564	-0.141017	-0.120747	0.236134	-0.248276	0.0187235	0.0329299	-0.238336	-0.0749857	-0.25497	-0.434057	-0.566572	0.0240218	-0.0220248	-0.0866104	-0.0376082
CDK17	brown	-0.0411086	-0.163203	0.0467888	0.474968	0.356881	0.254638	0.214896	0.241331	0.645595	-0.47165	-0.114493	0.257289	0.29289	0.321483	0.508436	0.842244	0.711611	-0.204439	-0.160721	0.171091	-0.515697	-0.133766	-0.102016	-0.00877633	0.192173	0.347022	0.54508	0.284512	0.728625	-0.127407	-0.340765	-0.455672	-0.437071	-0.710229	-0.437841	-0.393216	-0.469109	-0.291352	-0.360929	-0.420913	-0.169389
NCKAP1	brown	-0.160075	0.000488793	0.181829	0.672871	0.510396	0.163154	0.30745	0.0502698	0.455785	-0.488548	-0.287646	-0.0518572	0.0352526	-0.0263429	0.361826	0.812944	0.554103	-0.126447	-0.236851	0.0293129	-0.539295	-0.265258	-0.293954	-0.16004	-0.0425001	0.649375	0.220402	0.182128	0.651933	-0.272651	-0.279094	-0.442295	-0.579303	-0.638574	-0.42909	-0.189563	-0.334511	0.0728499	-0.0624496	-0.0278909	0.0928402
APPBP2	brown	-0.164693	0.251814	0.465335	0.496805	0.613811	0.335237	0.354837	0.334685	0.715163	-0.128126	0.0555456	0.355398	0.272549	-0.0474252	0.626385	0.736342	0.615778	-0.161346	-0.186893	-0.00904534	-0.663382	-0.416382	-0.504383	-0.199086	0.0328078	0.202764	0.0810209	-0.0949024	0.320182	0.000266172	-0.123059	-0.200446	-0.392565	-0.181922	-0.167286	-0.475323	-0.425034	-0.210043	-0.170129	-0.458941	-0.343289
LRRC40	brown	0.0517458	-0.421746	-0.0843157	0.272286	0.0708591	-0.010088	-0.0635594	0.0780073	0.400594	-0.52911	-0.114276	0.320227	0.514018	0.196731	0.468111	0.70504	0.758103	-0.179837	-0.139246	0.0724309	-0.266919	-0.0524665	0.0243968	0.0564472	0.276109	0.333473	0.645872	0.213804	0.645953	0.192857	-0.29621	-0.390737	-0.341569	-0.639984	-0.118657	-0.271742	-0.191799	-0.214144	-0.220137	-0.470734	-0.181924
ATG2B	brown	-0.30974	0.419984	0.523244	0.585036	0.725829	0.499898	0.575342	0.435948	0.721714	0.149865	0.301219	0.491904	0.28944	-0.108461	0.660917	0.668048	0.433816	-0.210146	-0.20618	0.0836159	-0.815874	-0.461819	-0.631549	-0.213646	0.0968027	0.235724	-0.0805171	-0.107248	0.272464	-0.0278433	-0.262053	-0.260653	-0.170008	-0.0789935	-0.286508	-0.526674	-0.524952	-0.306439	-0.273025	-0.34594	-0.370031
ARFGEF1	brown	-0.188126	0.395745	0.66821	0.467898	0.723064	0.109258	0.331544	-0.00891025	0.412392	0.0872275	0.205998	0.216877	0.259496	0.265668	0.724537	0.698889	0.571568	-0.260647	-0.356294	-0.235876	-0.616694	-0.600737	-0.482434	-0.222428	0.0296588	-0.0341925	-0.0807206	-0.263675	0.160405	-0.0668459	-0.140353	-0.0680668	-0.457814	-0.128159	-0.18202	-0.249827	-0.322488	-0.0798971	-0.0508818	-0.0998785	-0.10962
DHX29	brown	0.0572279	-0.179239	0.0951633	0.480559	0.299724	0.184619	0.188515	0.341013	0.612977	-0.150014	0.281419	0.57959	0.559521	0.225236	0.640735	0.692172	0.55548	-0.19815	-0.299953	0.0345834	-0.654723	-0.275418	-0.287418	0.13302	0.250957	0.430248	0.442278	0.19878	0.641731	-0.0622669	-0.480845	-0.435404	-0.203722	-0.52976	-0.224848	-0.461545	-0.406086	-0.306138	-0.235586	-0.432347	-0.278664
ACSL4	brown	-0.258819	0.0166505	0.122196	0.796094	0.573593	0.413419	0.524396	0.322514	0.633209	-0.350487	-0.112341	0.203208	0.124407	0.0249171	0.439666	0.828426	0.420486	-0.344907	-0.213789	0.282173	-0.58074	-0.0812729	-0.183132	-0.187678	0.0200261	0.478294	0.212515	0.405421	0.760743	-0.201134	-0.430033	-0.579871	-0.490172	-0.580003	-0.516422	-0.376922	-0.618334	-0.215249	-0.323307	-0.15862	-0.0400304
ERLEC1	brown	-0.198935	0.150825	0.268402	0.681403	0.657736	0.511247	0.538851	0.479909	0.80868	-0.255198	-0.055606	0.30115	0.127039	0.00539618	0.534634	0.809361	0.488081	-0.222882	-0.130287	0.226294	-0.736109	-0.204125	-0.284836	-0.16799	0.162522	0.382214	0.145014	0.230089	0.581729	-0.221935	-0.178897	-0.320372	-0.229971	-0.356285	-0.308861	-0.652182	-0.735167	-0.252053	-0.240965	-0.304971	-0.27091
SEL1L	brown	-0.263356	0.266507	0.530285	0.551494	0.666755	0.230727	0.344832	0.192116	0.6153	-0.224613	-0.108002	0.0582176	0.0753003	0.0755258	0.56221	0.776545	0.595046	-0.151887	-0.325816	-0.12335	-0.688744	-0.478339	-0.435328	-0.222073	-0.0161963	0.353664	-0.0132862	-0.0905706	0.359696	-0.154034	-0.088513	-0.208404	-0.349106	-0.322969	-0.260998	-0.408354	-0.44077	0.061911	0.0149842	-0.114957	-0.0724778
UBE2D1	brown	-0.0232318	-0.3089	-0.0748746	0.291162	0.162217	0.062418	0.00113064	0.0688365	0.417292	-0.55651	-0.287144	0.0723148	0.178288	0.191073	0.344565	0.697231	0.648308	-0.123972	-0.0356617	0.117776	-0.213262	0.0236169	0.121691	-0.1097	0.190278	0.252008	0.535232	0.28484	0.616259	-0.06712	-0.0792675	-0.203105	-0.366594	-0.614578	-0.238843	-0.257012	-0.306461	-0.158237	-0.21146	-0.332983	-0.0567077
TPD52	brown	-0.0166334	-0.155636	-0.00478984	0.668167	0.455923	0.308508	0.354868	0.287127	0.653717	-0.295086	0.0378892	0.290598	0.190819	0.371243	0.505961	0.797605	0.492574	-0.444631	-0.260666	0.20729	-0.553826	-0.0739156	-0.0151905	0.0689855	0.228182	0.242305	0.482054	0.442057	0.763572	-0.312038	-0.246709	-0.35176	-0.536029	-0.581409	-0.481956	-0.433279	-0.662176	-0.369137	-0.336487	-0.236959	-0.185397
USP33	brown	-0.12663	-0.0710124	0.190683	0.645316	0.531484	0.294855	0.330088	0.338473	0.718729	-0.339405	0.0232766	0.45107	0.40612	0.00696783	0.612333	0.885424	0.687544	-0.31039	-0.266761	0.0916191	-0.681151	-0.273598	-0.300022	0.00310925	0.357255	0.447949	0.390839	0.181168	0.670777	-0.0141053	-0.270288	-0.389793	-0.376074	-0.477094	-0.218095	-0.59013	-0.528951	-0.315595	-0.251214	-0.437793	-0.370796
UBE2K	brown	-0.316844	0.126727	0.263645	0.75451	0.678983	0.308743	0.475517	0.202935	0.599457	-0.293227	-0.0241918	0.214693	0.166157	-0.0451504	0.532853	0.884895	0.542515	-0.228572	-0.268989	0.0858632	-0.706143	-0.311072	-0.341571	-0.262897	0.09604	0.501812	0.206187	0.216568	0.680828	-0.269469	-0.287435	-0.457189	-0.424207	-0.42956	-0.417081	-0.397179	-0.529386	-0.0807612	-0.166158	-0.0878381	-0.0293422
ITCH	brown	-0.257551	0.220494	0.454487	0.586662	0.638871	0.411716	0.402753	0.504451	0.830616	-0.186502	0.0274119	0.367489	0.268764	-0.00709869	0.58629	0.800265	0.603961	-0.106388	-0.207439	0.0380207	-0.768691	-0.420615	-0.491409	-0.221172	0.324209	0.414395	0.0895739	-0.0383082	0.427752	-0.0307978	-0.22411	-0.290831	-0.261571	-0.314287	-0.255347	-0.623397	-0.579386	-0.192098	-0.159747	-0.325314	-0.299589
RAB21	brown	-0.122598	-0.301054	-0.0952076	0.441008	0.195885	0.0941091	0.127263	0.0614134	0.38927	-0.528172	-0.20423	0.0333896	0.139786	0.0796213	0.307284	0.687509	0.552916	-0.189387	-0.159825	0.116809	-0.297417	-0.0449306	0.0803969	0.039347	0.265637	0.357075	0.474103	0.31599	0.67775	-0.105469	-0.0793243	-0.300717	-0.284056	-0.563968	-0.376457	-0.128072	-0.325715	-0.0133194	-0.231621	-0.219821	0.206834
OSTM1	brown	-0.148179	-0.152663	0.0297731	0.635073	0.387935	0.153857	0.271098	0.0999326	0.420995	-0.446332	-0.164163	0.13986	0.191467	-0.178101	0.373457	0.77406	0.555768	-0.191487	-0.190092	0.10106	-0.48929	-0.187104	-0.230793	-0.114716	0.169858	0.603802	0.332583	0.211348	0.663996	-0.133797	-0.187992	-0.381527	-0.417582	-0.490777	-0.271361	-0.264137	-0.366382	-0.0255355	-0.0879778	-0.0915594	-0.0141036
C5orf22	brown	-0.155868	-0.163212	0.142697	0.665007	0.444062	0.170493	0.281805	0.249422	0.550486	-0.205342	0.197551	0.482139	0.486323	0.0725326	0.612174	0.799878	0.543066	-0.373336	-0.374442	0.0272704	-0.635501	-0.27611	-0.312224	0.0096759	0.213139	0.44712	0.34556	0.226702	0.695211	-0.0751394	-0.351754	-0.401983	-0.342549	-0.446662	-0.211128	-0.49283	-0.470731	-0.151144	-0.0673883	-0.271015	-0.245071
GSK3B	brown	-0.411373	0.356727	0.532292	0.761501	0.838117	0.295975	0.540048	0.161162	0.563829	-0.0685419	0.12275	0.296799	0.217662	-0.100085	0.617197	0.803318	0.487309	-0.353338	-0.402643	-0.0783899	-0.790967	-0.517704	-0.553804	-0.145993	0.086118	0.350554	-0.0623937	-0.0452159	0.408984	-0.08141	-0.240647	-0.350039	-0.465695	-0.167588	-0.22894	-0.460662	-0.475894	-0.119172	-0.0566592	-0.0701345	-0.237505
PDS5B	brown	-0.296838	0.143509	0.19318	0.680076	0.642936	0.444472	0.503706	0.281373	0.689973	-0.372167	-0.216534	0.0403564	-0.112086	-0.124689	0.367328	0.796579	0.485858	-0.212409	-0.126005	0.188592	-0.65964	-0.197268	-0.257009	-0.188365	0.17977	0.444814	0.170262	0.226651	0.579555	-0.331886	0.0173092	-0.240879	-0.271756	-0.334767	-0.415287	-0.494638	-0.6414	-0.138853	-0.208835	-0.130036	-0.1217
SCAMP1	brown	-0.125443	-0.195149	0.15419	0.498765	0.399606	0.0485184	0.139606	0.0275955	0.499257	-0.38215	-0.143367	0.133986	0.195414	0.138363	0.566755	0.820258	0.730539	-0.448991	-0.396932	-0.0734537	-0.502841	-0.280471	-0.165865	-0.0298127	0.0813757	0.233056	0.370305	0.0848071	0.532108	-0.111047	-0.043791	-0.0827416	-0.344083	-0.407355	-0.289035	-0.329325	-0.429242	-0.0433684	-0.0859985	-0.255561	-0.0764173
KLHL42	brown	-0.322159	0.314182	0.499858	0.526131	0.665296	0.401898	0.462407	0.452103	0.718619	0.133601	0.40483	0.651951	0.472684	0.016889	0.729914	0.654809	0.456665	-0.278198	-0.275043	0.0137436	-0.761549	-0.443928	-0.556735	-0.182469	0.0997014	0.0978593	0.0105943	-0.0615785	0.309292	0.127958	-0.300078	-0.315032	-0.209894	-0.0221433	-0.123007	-0.589554	-0.492023	-0.345244	-0.213458	-0.444594	-0.460409
DNM1L	brown	-0.0969732	-0.0078931	0.132855	0.685711	0.502949	0.358601	0.485188	0.370242	0.579236	0.0192163	0.427308	0.701678	0.578013	0.100107	0.623684	0.675289	0.350626	-0.438043	-0.313376	0.199902	-0.68387	-0.179386	-0.334704	0.0751541	0.17143	0.305697	0.305357	0.358227	0.693714	-0.0962717	-0.530373	-0.54078	-0.267758	-0.365249	-0.237571	-0.528956	-0.503846	-0.414149	-0.305891	-0.380923	-0.384679
HECTD1	brown	-0.296107	0.335952	0.615599	0.512236	0.7032	0.225334	0.342452	0.211568	0.623594	-0.087977	0.106437	0.299657	0.306898	-0.0236822	0.65302	0.745891	0.615777	-0.121052	-0.318475	-0.176872	-0.771742	-0.594137	-0.578519	-0.186129	0.193323	0.326588	-0.0450034	-0.223347	0.273937	0.0212798	-0.143374	-0.193546	-0.252655	-0.161345	-0.137334	-0.501653	-0.398107	-0.0602532	-0.0434685	-0.200622	-0.220018
MAPK1	brown	-0.110654	0.0616895	0.184356	0.56003	0.480848	0.166036	0.306452	-0.00806488	0.363844	-0.277311	-0.00913565	0.175401	0.28704	0.134887	0.472157	0.758344	0.573922	-0.206767	-0.239501	0.0607508	-0.492303	-0.315599	-0.344075	0.00981909	0.000499123	0.413231	0.321252	0.0792323	0.569858	-0.0923015	-0.484363	-0.546829	-0.676392	-0.666576	-0.504447	-0.0738243	-0.19966	-0.242356	-0.337312	-0.185797	-0.0796774
SEC23A	brown	-0.24459	0.0593167	0.399278	0.63927	0.560914	-0.0586074	0.297039	-0.151698	0.236186	-0.146177	-0.0199646	0.0243921	0.146725	0.130847	0.567852	0.709656	0.476201	-0.480659	-0.539828	-0.225599	-0.48479	-0.413963	-0.279609	-0.228883	-0.055379	0.217785	-0.0652785	-0.00350599	0.40959	-0.165037	-0.214677	-0.177699	-0.364464	-0.300826	-0.187847	-0.0667711	-0.259602	0.267187	0.155322	0.0139989	0.2089
USP14	brown	-0.190951	0.104868	0.232566	0.826387	0.676145	0.436656	0.591899	0.400585	0.700834	-0.110566	0.230675	0.478999	0.352432	0.0698918	0.619155	0.837754	0.416099	-0.373823	-0.290712	0.200371	-0.750594	-0.23477	-0.330363	-0.0668051	0.197911	0.387363	0.214226	0.359907	0.748941	-0.253538	-0.412975	-0.515131	-0.38943	-0.457148	-0.37912	-0.51018	-0.636625	-0.339383	-0.344979	-0.294794	-0.226334
KPNA3	brown	-0.101788	-0.15338	0.0866894	0.585703	0.387716	0.155596	0.241712	0.0971198	0.478188	-0.330303	-0.0138112	0.236155	0.299627	0.0813563	0.51264	0.817756	0.625217	-0.316121	-0.278309	0.0902713	-0.507118	-0.214462	-0.245211	0.00227415	0.0715425	0.459775	0.442451	0.226443	0.701924	-0.162934	-0.346815	-0.418402	-0.548259	-0.658003	-0.444545	-0.196954	-0.319094	-0.191543	-0.287443	-0.318434	-0.067711
GSPT1	brown	0.0578074	-0.168907	0.0639955	0.237631	0.168993	-0.0918706	-0.0580344	-0.167599	0.221705	-0.430398	-0.170028	-0.0580813	0.162831	0.251341	0.341948	0.610547	0.612713	-0.0461626	-0.202757	-0.111423	-0.261739	-0.265735	-0.112248	0.0894223	-0.041521	0.299703	0.453785	0.0323241	0.460459	-0.12247	-0.150661	-0.238796	-0.589775	-0.612482	-0.307539	0.0232019	-0.056032	0.0820418	-0.069774	-0.144955	0.196423
RAB11A	brown	-0.349787	-0.0846758	0.128039	0.747551	0.511089	0.112801	0.34824	0.0946287	0.386614	-0.290922	-0.0133464	0.158157	0.170709	-0.0902731	0.373791	0.741954	0.379204	-0.36066	-0.392494	-0.00207791	-0.528145	-0.19191	-0.178748	-0.0445822	0.234719	0.487842	0.190232	0.347168	0.714477	-0.273381	-0.177828	-0.337045	-0.290007	-0.372429	-0.193875	-0.365555	-0.427348	0.09581	0.0969513	0.014499	0.000741532
BLOC1S6	brown	-0.182031	0.0610992	0.44153	0.486011	0.532215	-0.0589083	0.118032	-0.0417057	0.397242	-0.0873831	0.20653	0.296398	0.425705	0.309035	0.733269	0.783998	0.662759	-0.262306	-0.428751	-0.259849	-0.58184	-0.499603	-0.3392	-0.0460236	0.113491	0.143988	0.223643	-0.0563612	0.439109	-0.108925	-0.222727	-0.180255	-0.534908	-0.334556	-0.206308	-0.266	-0.303018	-0.0382688	0.00169904	-0.0799829	-0.0607535
IMPAD1	brown	-0.257833	0.101384	0.193043	0.794459	0.621596	0.513927	0.582969	0.503197	0.779632	-0.202642	0.145833	0.483875	0.340091	-0.0663806	0.517931	0.808107	0.4259	-0.252708	-0.1822	0.280006	-0.761066	-0.182945	-0.375821	-0.107803	0.162884	0.520803	0.239304	0.354782	0.734337	-0.182622	-0.410382	-0.569846	-0.349144	-0.384887	-0.307406	-0.581984	-0.637403	-0.296749	-0.257369	-0.312947	-0.308004
UBE2W	brown	-0.13531	-0.210386	0.03804	0.43611	0.317747	0.0340943	0.0647646	-0.0414177	0.417068	-0.543678	-0.303476	-0.0541011	0.0507218	0.134994	0.386784	0.804062	0.70099	-0.145156	-0.17948	0.00746395	-0.366363	-0.170991	-0.0415633	-0.0788655	0.0819736	0.411254	0.462562	0.165482	0.604283	-0.217902	-0.0932451	-0.208919	-0.536866	-0.659271	-0.43777	-0.155636	-0.330955	-0.0162373	-0.133669	-0.114179	0.0952256
RAB2A	brown	-0.0469634	-0.361963	-0.118223	0.47045	0.21555	0.1199	0.12352	0.126776	0.509926	-0.526401	-0.129476	0.231958	0.326253	0.247868	0.455876	0.796196	0.679048	-0.292325	-0.217665	0.148968	-0.39201	-0.0383977	0.0155135	0.030505	0.124464	0.36654	0.633228	0.387081	0.798765	-0.0598258	-0.284152	-0.420071	-0.454814	-0.722905	-0.371169	-0.285865	-0.368108	-0.208607	-0.281912	-0.443617	-0.0968855
MTMR9	brown	-0.306951	0.232456	0.347374	0.781975	0.754168	0.395468	0.56639	0.243194	0.647654	-0.117334	0.123694	0.340968	0.20779	0.020746	0.578095	0.837365	0.461344	-0.436046	-0.345737	0.102929	-0.731566	-0.338901	-0.461139	-0.077631	-0.0497956	0.281028	0.13005	0.191298	0.588169	-0.241442	-0.32674	-0.411042	-0.561576	-0.307313	-0.346491	-0.466621	-0.564014	-0.23446	-0.194139	-0.24011	-0.267887
LEPROTL1	brown	-0.281555	0.0111409	0.157995	0.720063	0.548849	0.304002	0.439891	0.232725	0.536445	-0.291454	-0.037939	0.236545	0.165749	-0.150244	0.404971	0.755469	0.417714	-0.328436	-0.188543	0.168218	-0.471718	-0.0881719	-0.177143	-0.166138	0.147759	0.31173	0.179719	0.348175	0.647609	-0.0763596	-0.120695	-0.342316	-0.472839	-0.305798	-0.165179	-0.446948	-0.498991	-0.137618	-0.13283	-0.221318	-0.192136
AVL9	brown	-0.210802	0.129881	0.428554	0.612685	0.60478	0.0562394	0.320207	-0.0370409	0.373285	-0.0985274	0.153917	0.237711	0.377044	0.141907	0.709904	0.815213	0.615905	-0.324114	-0.48401	-0.179015	-0.681684	-0.582759	-0.501324	-0.0704221	-0.0546348	0.35382	0.108722	-0.126612	0.44673	-0.113795	-0.378295	-0.366611	-0.467779	-0.440009	-0.380608	-0.14759	-0.277676	0.0576756	-0.0721012	-0.0828596	0.0909675
GTPBP10	brown	-0.247622	0.0456838	0.325197	0.635602	0.59398	0.206234	0.339283	0.230811	0.590139	-0.164162	0.114991	0.402072	0.344944	-0.0558329	0.588291	0.80311	0.548454	-0.32262	-0.32898	-0.0296438	-0.686746	-0.333616	-0.323924	-0.0685655	0.370201	0.321368	0.16656	0.111867	0.541011	-0.0835819	-0.180321	-0.182286	-0.229917	-0.258613	-0.106307	-0.606401	-0.576884	-0.173999	-0.103915	-0.245563	-0.260644
CBLL1	brown	-0.190508	0.282716	0.574037	0.386214	0.574442	0.146927	0.197186	0.183706	0.601183	-0.0555165	0.142376	0.267139	0.30336	0.247964	0.662374	0.685608	0.630714	-0.0940476	-0.349814	-0.22843	-0.692293	-0.58409	-0.519714	-0.0507109	0.0513432	0.205424	0.0727212	-0.220191	0.244875	-0.0648401	-0.174714	-0.194228	-0.434863	-0.272175	-0.247613	-0.400985	-0.328926	-0.0523991	0.0323595	-0.207516	-0.246962
LMBR1	brown	-0.393292	0.277442	0.553522	0.611692	0.681078	0.0885075	0.375858	-0.03118	0.33761	-0.0598427	0.00677079	0.0966928	0.117318	-0.142498	0.527633	0.65828	0.424049	-0.415316	-0.435715	-0.192091	-0.503628	-0.406854	-0.410501	-0.244466	-0.059016	0.139895	-0.204503	-0.0603445	0.279174	-0.0307496	-0.0823875	-0.119085	-0.362021	-0.04897	0.0189405	-0.257724	-0.23716	0.167202	0.211469	-0.112276	-0.0920533
TAX1BP1	brown	-0.36773	0.216283	0.418826	0.709243	0.666008	0.115021	0.43573	-0.0398774	0.335329	-0.112473	0.00420943	0.022626	0.0302372	-0.115159	0.438365	0.694603	0.375273	-0.356327	-0.449538	-0.135328	-0.579537	-0.399716	-0.365926	-0.104694	0.159438	0.320449	-0.109761	0.0762967	0.457064	-0.279158	-0.154237	-0.167345	-0.262518	-0.240412	-0.271946	-0.155114	-0.303697	0.152467	-0.00604968	-0.00696619	0.15261
TMEM245	brown	-0.125013	0.240221	0.530823	0.485791	0.618901	0.04022	0.240621	-0.0436875	0.411672	-0.0402202	0.0488003	0.0838423	0.110437	0.199825	0.621394	0.676325	0.545941	-0.322545	-0.444209	-0.27009	-0.563372	-0.524929	-0.433953	-0.118753	-0.20445	0.105299	-0.00807997	-0.169409	0.220503	-0.158603	-0.0742124	-0.0447858	-0.55719	-0.194266	-0.161475	-0.206315	-0.257385	0.0677986	0.106526	-0.115221	-0.0953565
RAB11FIP2	brown	-0.281354	0.225115	0.572799	0.424102	0.606261	-0.0776353	0.166499	-0.172059	0.308604	0.0308496	0.222179	0.207481	0.337375	0.250765	0.741349	0.724433	0.655777	-0.283507	-0.469273	-0.342539	-0.555108	-0.600811	-0.486339	-0.198567	-0.0443521	0.0784864	0.0331134	-0.234961	0.257809	-0.128587	-0.2295	-0.127195	-0.459856	-0.229134	-0.208697	-0.0891559	-0.11207	0.0435417	0.0536041	-0.118363	-0.0456054
MAPK8	brown	-0.13631	0.235303	0.370083	0.638092	0.660575	0.309413	0.481041	0.208586	0.560948	0.0915898	0.374162	0.500549	0.371529	0.155146	0.670459	0.688761	0.402815	-0.446061	-0.364132	0.0187275	-0.682401	-0.385839	-0.44316	-0.0167471	-0.0030649	0.0261753	0.135511	0.103461	0.449525	-0.118313	-0.278643	-0.301412	-0.50103	-0.123926	-0.276733	-0.41252	-0.490995	-0.349583	-0.262501	-0.249976	-0.323896
ATE1	brown	-0.0878344	0.0211196	0.351582	0.575706	0.574314	0.171963	0.265542	0.161958	0.651848	-0.302692	-0.00559062	0.259446	0.320537	0.235919	0.724581	0.924013	0.775593	-0.27662	-0.347248	-0.0765858	-0.686534	-0.439702	-0.318764	-0.0368495	0.1139	0.285895	0.323341	0.024159	0.563027	-0.088196	-0.193454	-0.253819	-0.480566	-0.497882	-0.333909	-0.398185	-0.486104	-0.139333	-0.178245	-0.319602	-0.118881
CCSER2	brown	-0.34073	0.270126	0.39714	0.757809	0.757505	0.417257	0.551221	0.377992	0.703743	-0.132621	0.0990241	0.358691	0.212113	-0.0537448	0.507536	0.768748	0.393402	-0.187664	-0.229319	0.095475	-0.732107	-0.280698	-0.394372	-0.209245	0.242449	0.433313	0.0196834	0.205024	0.555381	-0.21299	-0.324997	-0.433049	-0.3227	-0.25361	-0.19424	-0.591598	-0.567384	-0.216886	-0.106593	-0.169262	-0.315265
SHOC2	brown	-0.223848	-0.0683815	0.210215	0.575047	0.495519	0.0191131	0.210256	-0.121478	0.361348	-0.352876	-0.158218	-0.0524952	0.0538505	0.118459	0.501174	0.812479	0.652721	-0.451831	-0.413012	-0.10175	-0.481884	-0.332488	-0.161138	0.0134508	0.0891449	0.225278	0.294619	0.0791396	0.524783	-0.209646	0.0588858	-0.0989512	-0.535777	-0.435092	-0.467115	-0.151424	-0.372893	0.00992433	-0.0922565	-0.0112417	0.099227
CUL2	brown	-0.125248	0.0820578	0.143071	0.723738	0.589138	0.455884	0.535682	0.348479	0.680901	-0.381408	-0.141266	0.223737	0.132645	-0.0891329	0.409424	0.79264	0.462412	-0.241252	-0.153904	0.259403	-0.655307	-0.142825	-0.275089	-0.0292349	0.130363	0.483583	0.235195	0.339042	0.705153	-0.232253	-0.293617	-0.499191	-0.363266	-0.517593	-0.420696	-0.48134	-0.569371	-0.281633	-0.357977	-0.297508	-0.212784
RPS6KB1	brown	-0.0637941	0.000629264	0.328904	0.470462	0.498403	0.108948	0.164859	0.100842	0.581805	-0.22782	0.114381	0.347877	0.398595	0.163164	0.701633	0.858801	0.784658	-0.237528	-0.332864	-0.134627	-0.63378	-0.493206	-0.423974	0.00586962	0.22076	0.222013	0.386321	-0.0674452	0.485816	-0.0549433	-0.137789	-0.151359	-0.513038	-0.413636	-0.250245	-0.386977	-0.359263	-0.1718	-0.166216	-0.344849	-0.207305
CPD	brown	-0.252434	-0.0732641	0.231911	0.605069	0.490197	0.154292	0.263524	0.191934	0.576691	-0.364876	-0.185777	0.0587541	0.035326	0.0772661	0.475765	0.751987	0.542014	-0.352513	-0.401611	-0.0517424	-0.610726	-0.278979	-0.172048	-0.0426949	0.0433241	0.410298	0.171777	0.154509	0.540238	-0.197555	-0.0412209	-0.167591	-0.265102	-0.399363	-0.314794	-0.415354	-0.543536	0.130643	0.102893	-0.105568	0.0367496
PRKAR1A	brown	-0.316489	-0.0064514	0.286869	0.551315	0.500815	0.137573	0.277709	0.126068	0.495307	-0.308389	-0.107209	0.125678	0.186822	0.0142529	0.506915	0.779177	0.58108	-0.2577	-0.272685	-0.0203845	-0.504711	-0.248119	-0.150341	-0.287342	0.27663	0.286884	0.1316	0.117858	0.52352	-0.0671107	-0.0855564	-0.148471	-0.173644	-0.301429	-0.153309	-0.379667	-0.459492	0.0936522	-0.0140038	-0.127459	0.0865295
TMEM33	brown	-0.306688	0.0567464	0.021046	0.750674	0.53397	0.517791	0.576686	0.347528	0.631287	-0.33413	-0.0861281	0.249137	0.0996481	-0.24404	0.31137	0.752225	0.378892	-0.252901	-0.0841259	0.372533	-0.578322	-0.0617997	-0.320369	-0.14623	0.0545316	0.566256	0.251644	0.38826	0.727444	-0.231934	-0.37833	-0.55414	-0.384507	-0.469553	-0.446913	-0.335436	-0.492604	-0.250427	-0.352202	-0.270477	-0.160492
DCUN1D4	brown	-0.206944	0.0757987	0.290347	0.671295	0.582653	0.202336	0.435019	0.167068	0.472305	0.134063	0.473343	0.541526	0.440243	0.0534854	0.703598	0.70664	0.415844	-0.504305	-0.487679	-0.0393217	-0.682977	-0.388788	-0.431571	0.00770608	0.181903	0.185904	0.169716	0.136966	0.535683	-0.150567	-0.377439	-0.324124	-0.21904	-0.219949	-0.26403	-0.309704	-0.367344	-0.272071	-0.25405	-0.308962	-0.224831
KLHL2	brown	0.0311857	-0.273743	-0.109729	0.564441	0.300052	0.230819	0.212074	0.235484	0.561423	-0.565771	-0.229545	0.156275	0.175574	0.251442	0.353086	0.778338	0.587283	-0.172379	-0.0954295	0.241152	-0.416892	0.0088719	0.0392081	0.00695952	0.293539	0.539375	0.559988	0.409901	0.785163	-0.191287	-0.348872	-0.53788	-0.548734	-0.809177	-0.479908	-0.305172	-0.461413	-0.31107	-0.336422	-0.209999	-0.114415
CLCN3	brown	-0.305948	0.265634	0.399549	0.67449	0.678205	0.435221	0.528472	0.381147	0.668451	-0.21817	-0.000391229	0.364511	0.260462	-0.16937	0.479115	0.741686	0.476447	-0.1607	-0.165785	0.13276	-0.64222	-0.284369	-0.452362	-0.266586	0.238962	0.464611	0.00222628	0.0840281	0.476754	0.111946	-0.383534	-0.533597	-0.364873	-0.341514	-0.165137	-0.504665	-0.407439	-0.255766	-0.188706	-0.377244	-0.376431
DHX15	brown	-0.175731	0.0922611	0.513038	0.556944	0.577973	-0.0256499	0.242356	-0.0455753	0.397569	-0.0699555	0.151328	0.173053	0.286745	0.251092	0.748154	0.746818	0.602131	-0.399608	-0.565687	-0.285515	-0.644474	-0.536615	-0.362865	-0.0920711	0.00656764	0.145452	0.0460345	-0.0606828	0.399282	-0.0746167	-0.125929	-0.11233	-0.333523	-0.290102	-0.244714	-0.233291	-0.355646	0.114741	0.037711	-0.113674	0.118197
BIRC2	brown	-0.276769	0.0968431	0.449531	0.614772	0.610182	-0.0589481	0.224352	-0.130453	0.34284	-0.132813	0.00408038	-0.00233431	0.0474291	0.0552728	0.564868	0.739646	0.54953	-0.407509	-0.571338	-0.330763	-0.595118	-0.546163	-0.377328	-0.141005	0.105731	0.243918	-0.0100394	-0.111759	0.349621	-0.288662	0.0176462	0.00871864	-0.363008	-0.194961	-0.236264	-0.160542	-0.326379	0.220652	0.151404	0.0912251	0.152053
PDHX	brown	-0.255781	0.00741596	0.354194	0.65373	0.540727	-0.00387337	0.286649	-0.0938556	0.340975	-0.149127	0.108202	0.132819	0.23426	0.224379	0.624655	0.757277	0.506136	-0.446051	-0.55691	-0.173467	-0.54892	-0.3714	-0.322094	-0.11944	-0.126487	0.243394	0.115637	0.154354	0.572273	-0.226283	-0.345733	-0.322429	-0.479291	-0.40654	-0.284781	-0.107193	-0.263425	0.0831542	0.0118225	-0.0912269	0.111126
CAND1	brown	-0.360094	0.311396	0.529496	0.767804	0.832786	0.241333	0.516085	0.106784	0.56771	-0.00234699	0.204087	0.302856	0.193023	0.0593995	0.686918	0.839904	0.505786	-0.439738	-0.488146	-0.12044	-0.777523	-0.516641	-0.508679	-0.179052	0.0757535	0.236591	-0.0172657	0.0240879	0.46416	-0.253654	-0.259041	-0.275514	-0.464751	-0.219141	-0.294517	-0.393991	-0.502132	-0.119228	-0.0901327	-0.119976	-0.162604
UHRF1BP1L	brown	-0.0811676	-0.0711661	0.189641	0.489684	0.404146	0.0780185	0.175664	0.0914035	0.424682	-0.31873	-0.00855738	0.23482	0.344784	0.20413	0.498939	0.742698	0.584133	-0.111919	-0.237479	-0.00927324	-0.498311	-0.235779	-0.186271	-0.0768488	0.179048	0.458483	0.343163	0.183736	0.622307	-0.106521	-0.400851	-0.437615	-0.386568	-0.619595	-0.262416	-0.272036	-0.275433	-0.151761	-0.175984	-0.191795	-0.0787272
GOLT1B	brown	-0.196263	-0.0401855	0.270814	0.651635	0.533211	0.221492	0.326918	0.259298	0.627953	-0.239252	0.0908914	0.340744	0.357181	0.151625	0.658791	0.867279	0.62829	-0.259184	-0.336392	0.0136978	-0.676647	-0.343009	-0.3376	-0.105041	0.113019	0.452526	0.274115	0.141157	0.63971	-0.161008	-0.322924	-0.415736	-0.370942	-0.493141	-0.281104	-0.416072	-0.486314	-0.0914628	-0.126573	-0.244357	-0.0901838
FGFR1OP2	brown	-0.110424	-0.0978042	0.100542	0.486286	0.415662	0.166963	0.195376	0.0505286	0.499392	-0.346632	-0.131001	0.0738668	0.0758445	0.168111	0.493554	0.808049	0.655792	-0.342076	-0.197452	0.071181	-0.40385	-0.180141	-0.0986535	-0.0938196	0.0297038	0.144661	0.41477	0.176102	0.569523	-0.188006	0.0106632	-0.117207	-0.619572	-0.481894	-0.426074	-0.25138	-0.434432	-0.12513	-0.239141	-0.247568	0.00460278
RNGTT	brown	-0.263814	0.0963714	0.265798	0.619002	0.598085	0.225665	0.34778	0.0930733	0.548267	-0.334315	-0.218245	-0.038143	-0.0717373	-0.0635517	0.400751	0.804311	0.554759	-0.296865	-0.264197	0.00381078	-0.561783	-0.280734	-0.20204	-0.120536	0.204511	0.297212	0.169432	0.113114	0.493976	-0.276515	0.115995	-0.0260475	-0.409456	-0.321465	-0.344638	-0.388046	-0.549875	0.00739997	-0.0801677	-0.0418922	-0.00238377
MAPK14	brown	-0.0678234	0.0368665	0.263521	0.475207	0.479544	0.191345	0.255777	0.0604543	0.478184	-0.342673	-0.127186	0.103304	0.211196	0.200465	0.560692	0.762335	0.647203	-0.219895	-0.173355	0.0532306	-0.505034	-0.284672	-0.243889	-0.0383707	-0.0832537	0.239288	0.296544	0.0397922	0.469513	-0.0734983	-0.104855	-0.283455	-0.609572	-0.513578	-0.379089	-0.260878	-0.375935	-0.134906	-0.188927	-0.217907	-0.0666977
ZNF451	brown	-0.00181702	-0.116031	0.116314	0.589196	0.451833	0.309169	0.319203	0.399963	0.724854	-0.156627	0.246162	0.55466	0.416274	0.257346	0.677773	0.78753	0.591348	-0.324908	-0.293655	0.104366	-0.663932	-0.247872	-0.237242	0.020599	0.294658	0.319294	0.45882	0.243284	0.660206	-0.122149	-0.348782	-0.394883	-0.320435	-0.483382	-0.329818	-0.497141	-0.527814	-0.401427	-0.342395	-0.426415	-0.314113
CCNC	brown	-0.240642	-0.207079	0.214477	0.577706	0.399136	-0.144975	0.112538	-0.130732	0.256055	-0.256957	0.0405706	0.142128	0.276706	0.0765221	0.557036	0.75018	0.557844	-0.452848	-0.534323	-0.208788	-0.437398	-0.284285	-0.169079	-0.0118062	0.114176	0.331288	0.251841	0.187528	0.606874	-0.138905	-0.178242	-0.199344	-0.362908	-0.431829	-0.131077	-0.147459	-0.2162	0.102465	0.0577976	-0.133759	0.08023
TMEM30A	brown	-0.24398	-0.159453	0.100499	0.631812	0.396342	0.21185	0.288262	0.255003	0.576503	-0.459566	-0.110689	0.256996	0.326588	0.0263653	0.479366	0.821916	0.610607	-0.183632	-0.240288	0.126382	-0.527689	-0.145616	-0.151227	-0.138648	0.246627	0.581976	0.347011	0.29949	0.749663	0.0195154	-0.403615	-0.559124	-0.331419	-0.618203	-0.292942	-0.341158	-0.39376	-0.0701166	-0.167311	-0.26627	-0.0356638
COL4A3BP	brown	-0.276763	0.131229	0.371904	0.662062	0.687059	0.304682	0.40592	0.226565	0.681636	-0.227153	-0.00219851	0.246043	0.131586	0.00224669	0.615378	0.853854	0.615724	-0.372992	-0.327793	0.00420362	-0.695458	-0.337241	-0.348574	-0.151738	0.171218	0.286475	0.168681	0.114389	0.524056	-0.130511	-0.0427521	-0.218578	-0.386151	-0.312017	-0.314094	-0.537492	-0.559173	-0.213472	-0.13634	-0.293872	-0.306057
GOLPH3	brown	-0.0897611	-0.0694211	0.051576	0.407566	0.348728	0.153566	0.180149	-0.0693847	0.38663	-0.567075	-0.429719	-0.208188	-0.0881377	0.0480594	0.260072	0.739666	0.624128	-0.167389	-0.0784646	0.114969	-0.318576	-0.124464	-0.0687327	-0.123917	-0.000235661	0.302711	0.363049	0.141197	0.53763	-0.231458	0.0126181	-0.154164	-0.48097	-0.530141	-0.463786	-0.110679	-0.32427	0.0466447	-0.190942	-0.127946	0.201173
C5orf15	brown	-0.16649	-0.0826471	0.212755	0.588967	0.448589	0.195797	0.285799	0.197569	0.588137	-0.296811	-0.0139098	0.259023	0.302412	0.130944	0.631085	0.835969	0.64591	-0.317157	-0.319866	0.0519996	-0.602362	-0.280304	-0.286152	-0.160221	-0.0453416	0.347847	0.287094	0.161538	0.632899	-0.113985	-0.310143	-0.349563	-0.384853	-0.504693	-0.390413	-0.287141	-0.460363	-0.0834087	-0.183479	-0.29901	-0.0010143
TRIM23	brown	-0.136187	-0.0639009	0.188294	0.50266	0.471959	0.266551	0.253695	0.237167	0.68637	-0.368051	-0.13691	0.231457	0.183178	0.0991431	0.574341	0.823219	0.716904	-0.347005	-0.204912	0.0938827	-0.549849	-0.192295	-0.151683	-0.0585786	0.156059	0.212847	0.362982	0.135587	0.529774	-0.0401616	-0.0554193	-0.169613	-0.404431	-0.423541	-0.322135	-0.466211	-0.535304	-0.283114	-0.251469	-0.426405	-0.288424
TRAPPC13	brown	-0.127782	-0.109481	0.236809	0.566351	0.439703	0.216134	0.243204	0.379222	0.682069	-0.189194	0.235164	0.629796	0.612023	0.11434	0.698248	0.791625	0.629997	-0.297214	-0.315596	0.0368573	-0.657916	-0.267409	-0.332693	-0.00227628	0.24416	0.359716	0.364919	0.198895	0.648382	0.073639	-0.428029	-0.442964	-0.327935	-0.420023	-0.0911495	-0.591714	-0.459795	-0.306832	-0.155175	-0.494938	-0.426113
ARL6	brown	-0.201292	0.072138	0.282261	0.717015	0.641915	0.238028	0.381061	0.142943	0.577741	-0.256916	-0.0107486	0.205225	0.154292	-0.00311947	0.546406	0.860016	0.551196	-0.309141	-0.298675	0.0147347	-0.641829	-0.287978	-0.291508	-0.0686191	0.144576	0.40535	0.218647	0.219782	0.645449	-0.236611	-0.164823	-0.270951	-0.491964	-0.441747	-0.261018	-0.461664	-0.505282	-0.163653	-0.0982135	-0.14987	-0.218318
KPNA1	brown	-0.171401	0.292939	0.370106	0.673754	0.66116	0.283184	0.486481	0.139227	0.489602	0.0364166	0.257713	0.278182	0.222243	0.0580138	0.545954	0.703886	0.362485	-0.219772	-0.33872	-0.0361294	-0.701315	-0.493502	-0.5623	-0.0809759	-0.0926588	0.296714	0.0556932	0.0364798	0.465299	-0.32648	-0.326332	-0.326621	-0.514289	-0.28055	-0.339223	-0.276321	-0.391189	-0.0530468	-0.105948	-0.0891133	-0.0573365
UBE3A	brown	-0.170103	0.0625145	0.323423	0.609064	0.572628	0.28838	0.341291	0.330233	0.681209	-0.197972	0.181933	0.520931	0.490545	0.068926	0.664578	0.818815	0.613456	-0.159222	-0.262442	0.0300698	-0.716776	-0.34313	-0.429499	-0.0998785	0.284946	0.501238	0.265488	0.129953	0.613424	0.0319706	-0.437599	-0.518553	-0.346905	-0.498423	-0.199469	-0.558684	-0.407368	-0.326565	-0.224497	-0.399487	-0.410585
ARMC8	brown	-0.155138	0.0438284	0.266392	0.652022	0.589297	0.222214	0.410062	0.0921648	0.504971	-0.202313	0.0505799	0.205662	0.244032	0.281707	0.64099	0.811939	0.547092	-0.461538	-0.34239	0.0655995	-0.545711	-0.245505	-0.174299	-0.0923558	0.065502	0.117174	0.227708	0.233525	0.610991	-0.135639	-0.228943	-0.294922	-0.485728	-0.448441	-0.379475	-0.278799	-0.480034	-0.168629	-0.246507	-0.19981	-0.000786876
CLIP4	brown	-0.131241	0.0848348	0.368363	0.519425	0.534572	0.143127	0.277045	0.0858256	0.525783	-0.123382	0.145723	0.291506	0.365245	0.226826	0.707569	0.813623	0.682881	-0.262221	-0.381486	-0.111653	-0.649189	-0.497591	-0.452754	-0.0628951	0.104254	0.241488	0.20824	-0.0774374	0.457534	-0.100359	-0.346569	-0.261154	-0.296376	-0.395625	-0.341707	-0.253347	-0.316969	-0.164937	-0.224065	-0.276728	-0.127685
ORC4	brown	-0.094636	0.123016	0.400419	0.5786	0.606086	0.0618362	0.298345	-0.00452486	0.422738	0.0802807	0.264707	0.232046	0.164562	0.238289	0.681782	0.678584	0.462117	-0.536906	-0.548412	-0.233132	-0.628895	-0.49494	-0.386849	-0.00975546	-0.00861244	0.0301585	0.0799254	-0.0237372	0.353964	-0.298349	-0.0538316	-9.69e-05	-0.4114	-0.199183	-0.289193	-0.230768	-0.38785	-0.0954181	-0.0923131	-0.171386	-0.0945003
ATF2	brown	-0.140492	-0.0539947	0.172858	0.542922	0.487991	0.153504	0.236973	-0.0439309	0.490144	-0.446598	-0.224227	0.00424483	0.0609334	0.120607	0.49329	0.851395	0.698778	-0.380079	-0.252864	0.0346681	-0.458909	-0.225044	-0.155467	-0.00674994	0.0237622	0.17988	0.382094	0.15654	0.583033	-0.153456	-0.0148936	-0.15273	-0.601556	-0.489127	-0.454504	-0.231764	-0.418006	-0.166634	-0.257098	-0.25198	-0.047807
PLEKHA3	brown	-0.0572664	-0.243077	0.00513091	0.277995	0.213241	-0.012245	-0.0602679	-0.0471352	0.388285	-0.571242	-0.356923	-0.0915868	0.0171293	0.0720044	0.325767	0.722988	0.745438	0.00714719	-0.0651427	-0.0402906	-0.281836	-0.17035	-0.00524718	-0.110389	0.256232	0.375808	0.485427	0.0506261	0.471008	-0.101801	0.12653	-0.0420919	-0.430977	-0.539952	-0.309522	-0.201543	-0.277742	-0.0115859	-0.0939587	-0.123846	0.0448376
DNAJC16	brown	-0.104818	0.0550912	0.146521	0.653136	0.566858	0.43606	0.480046	0.36992	0.667576	-0.142531	0.0981959	0.39382	0.195646	0.0746915	0.496159	0.719292	0.428227	-0.439871	-0.187771	0.251344	-0.588105	-0.125952	-0.251779	-0.0379404	0.161959	0.243493	0.274989	0.272802	0.554656	-0.234312	-0.26051	-0.35214	-0.459431	-0.332418	-0.343866	-0.479888	-0.599291	-0.427657	-0.283728	-0.296547	-0.39298
STXBP3	brown	0.182155	-0.364182	-0.102002	0.226405	0.0774026	0.173966	-0.0346073	0.421194	0.660745	-0.433264	-0.0103779	0.480609	0.460677	0.271077	0.461971	0.638249	0.683008	-0.0599637	-0.0481282	0.146237	-0.355111	-0.0272471	-0.011658	-0.00449077	0.342108	0.30457	0.682692	0.250633	0.608218	0.134921	-0.263638	-0.369153	-0.288609	-0.565726	-0.170449	-0.474858	-0.347428	-0.418794	-0.334134	-0.585774	-0.394141
UCHL5	brown	-0.261156	0.0154589	0.200576	0.835412	0.650008	0.319661	0.494479	0.264405	0.645441	-0.29507	0.0312457	0.334804	0.28744	0.0296778	0.569481	0.907146	0.535064	-0.370835	-0.302628	0.140705	-0.68627	-0.218961	-0.254684	-0.107341	0.207346	0.454602	0.272225	0.351069	0.778897	-0.241663	-0.350259	-0.467531	-0.470839	-0.481709	-0.32805	-0.463912	-0.5969	-0.203326	-0.188705	-0.18782	-0.173685
LGALS8	brown	-0.165562	0.0682292	0.133337	0.690393	0.575311	0.271134	0.458083	0.0848294	0.474822	-0.183557	-0.0293216	0.0432781	-0.0347159	0.15829	0.423025	0.741835	0.372535	-0.468326	-0.357189	0.116065	-0.574799	-0.212447	-0.17392	-0.000652977	-0.0565183	0.221324	0.21418	0.293779	0.620743	-0.486807	-0.201829	-0.241462	-0.415688	-0.42669	-0.642026	-0.21026	-0.573872	-0.106508	-0.264917	0.0331604	0.109603
RBBP5	brown	-0.0433094	0.11088	0.232441	0.573916	0.578304	0.377695	0.420771	0.194337	0.6131	-0.316276	-0.109621	0.183227	0.14395	0.173939	0.523033	0.789106	0.576659	-0.263786	-0.137019	0.180065	-0.574047	-0.203163	-0.218986	0.0114309	-0.0101081	0.286652	0.273566	0.169367	0.547035	-0.12709	-0.19587	-0.381846	-0.561659	-0.564379	-0.418852	-0.437014	-0.511525	-0.305225	-0.28778	-0.328604	-0.253583
VAMP4	brown	0.100279	-0.302503	0.0888187	0.361423	0.216983	-0.208224	-0.0434702	-0.17574	0.196121	-0.282813	0.0633273	0.232322	0.479198	0.377323	0.590816	0.667674	0.654365	-0.337762	-0.416862	-0.186814	-0.290205	-0.273175	-0.0560704	0.143214	0.120328	0.152559	0.443367	0.0743506	0.514218	0.0516916	-0.327602	-0.268909	-0.464222	-0.530836	-0.145574	-0.0479045	-0.104423	-0.102951	-0.0931706	-0.170446	-0.00517989
RCN2	brown	-0.229141	-0.152922	0.272131	0.514271	0.391028	-0.111966	0.109859	-0.0448363	0.31464	-0.295512	0.010291	0.230965	0.380324	0.0760821	0.578279	0.732282	0.633053	-0.3024	-0.46635	-0.225813	-0.462257	-0.353515	-0.265093	-0.124275	0.236716	0.399782	0.209751	0.062934	0.53199	0.0442051	-0.282098	-0.307883	-0.241467	-0.440499	-0.0642569	-0.203814	-0.142944	0.0655651	0.0607737	-0.231912	-0.0614296
ANKRD13C	brown	-0.0238209	0.0157959	0.342168	0.444741	0.47396	0.113917	0.216991	0.130263	0.516868	-0.0538985	0.270171	0.46027	0.511854	0.411118	0.807693	0.761414	0.670141	-0.311783	-0.341815	-0.0741518	-0.573656	-0.402532	-0.334698	-0.155999	0.0277115	0.0509044	0.284927	-0.0114573	0.446919	0.00210991	-0.379023	-0.278855	-0.390146	-0.391008	-0.307451	-0.266612	-0.354616	-0.281469	-0.263794	-0.323347	-0.159811
RAB3GAP2	brown	-0.279099	0.127569	0.293028	0.638296	0.60604	0.254421	0.415992	0.0592866	0.462726	-0.313408	-0.163705	0.0433094	0.0456402	-0.15644	0.432289	0.784629	0.525457	-0.28466	-0.261264	0.0591141	-0.560496	-0.27346	-0.340429	-0.195088	0.0137955	0.440705	0.0954436	0.105469	0.525466	-0.194754	-0.172773	-0.312618	-0.337695	-0.400622	-0.347104	-0.27771	-0.373876	0.0143322	-0.121354	-0.142601	0.0154669
SENP5	brown	-0.130748	0.162388	0.114762	0.671213	0.586101	0.558669	0.597658	0.39255	0.646606	-0.226965	0.0281327	0.35136	0.208287	-0.162513	0.399093	0.71778	0.385447	-0.215638	-0.0591035	0.354259	-0.628775	-0.133441	-0.30827	0.0396118	0.153961	0.430604	0.239963	0.268047	0.610882	-0.0531548	-0.316362	-0.544977	-0.347657	-0.440659	-0.42338	-0.492219	-0.559051	-0.45929	-0.485036	-0.346567	-0.315665
RAB14	brown	-0.197955	0.15978	0.303087	0.688569	0.676691	0.414748	0.50172	0.296175	0.720954	-0.278172	-0.0470936	0.230873	0.151497	0.0764186	0.596386	0.863822	0.571514	-0.271702	-0.194061	0.148325	-0.676482	-0.279512	-0.302777	-0.143712	-0.00614389	0.292529	0.195424	0.172579	0.57787	-0.181605	-0.184239	-0.355433	-0.516797	-0.413782	-0.385973	-0.450764	-0.612752	-0.210278	-0.231651	-0.303433	-0.174958
PPP6C	brown	-0.0952883	-0.145035	0.168572	0.446475	0.317531	0.0579459	0.0768764	0.157636	0.515447	-0.37006	0.0174175	0.295103	0.461988	0.195684	0.511831	0.745709	0.674331	-0.049765	-0.223955	-0.0422271	-0.494998	-0.276318	-0.267546	0.0363526	0.201052	0.471975	0.459752	0.141306	0.608442	-0.0446507	-0.28932	-0.381348	-0.526073	-0.55703	-0.146574	-0.329434	-0.229361	-0.100457	-0.0215343	-0.249083	-0.221751
SLC17A5	brown	-0.114369	0.159137	0.262774	0.727206	0.628519	0.312062	0.497423	0.134241	0.513408	-0.277917	-0.150153	-0.0378946	-0.0622729	0.131353	0.428561	0.761163	0.408987	-0.30309	-0.298628	0.0839864	-0.599913	-0.296083	-0.304558	-0.135062	-0.158929	0.394974	0.0682637	0.165651	0.548928	-0.346213	-0.264635	-0.389504	-0.541886	-0.478542	-0.484399	-0.215523	-0.491743	0.00461903	-0.124102	0.00992344	0.102256
C10orf88	brown	-0.139318	-0.00665635	0.140105	0.649739	0.539608	0.396881	0.409611	0.392596	0.762996	-0.313447	0.0413759	0.403726	0.298289	0.0977292	0.555027	0.816804	0.579413	-0.233728	-0.214618	0.170423	-0.741687	-0.232944	-0.289389	0.025102	0.253957	0.473035	0.387427	0.26089	0.685255	-0.177797	-0.315021	-0.465872	-0.341782	-0.513529	-0.420374	-0.561198	-0.596225	-0.352389	-0.284051	-0.367091	-0.353212
PANK3	brown	-0.3121	0.0696851	0.391556	0.593535	0.601844	0.183671	0.280253	0.150994	0.613919	-0.24325	0.106807	0.370925	0.395215	0.0404222	0.683711	0.888053	0.758275	-0.233444	-0.319739	-0.0742812	-0.680374	-0.45309	-0.455009	-0.129516	0.273135	0.373886	0.26511	-0.0229662	0.519537	0.0134539	-0.226846	-0.339678	-0.446723	-0.364895	-0.220248	-0.419041	-0.38296	-0.18134	-0.132094	-0.279181	-0.250401
GRIA2	brown	-0.0844334	-0.175903	0.230472	0.304601	0.263469	0.00650407	0.00978316	0.124531	0.431369	-0.335225	-0.035433	0.278203	0.41714	0.134987	0.576505	0.668463	0.698781	-0.144452	-0.282704	-0.117922	-0.458575	-0.317564	-0.215397	-0.0338525	0.23499	0.401502	0.314421	-0.0709291	0.402901	0.321288	-0.20756	-0.309593	-0.261898	-0.52559	-0.163543	-0.34507	-0.219915	-0.106716	-0.11987	-0.26846	-0.138654
WBP4	brown	0.0303181	-0.228603	0.084823	0.307419	0.219843	-0.0599005	-0.0532929	0.025766	0.392601	-0.375699	-0.01462	0.249162	0.428991	0.30569	0.475712	0.676469	0.659195	-0.0878763	-0.215423	-0.0815598	-0.347202	-0.202401	-0.10326	0.0876298	0.286825	0.232573	0.51596	0.160329	0.575534	-0.0407917	-0.260553	-0.227838	-0.365471	-0.527759	-0.158064	-0.259177	-0.205004	-0.251161	-0.200821	-0.250326	-0.189574
PAPD5	brown	-0.11471	-0.225988	-0.0464264	0.358249	0.224045	0.0994289	0.102602	-0.0193081	0.378974	-0.553458	-0.409607	-0.188074	-0.116125	-0.0166369	0.265396	0.682749	0.60496	-0.267225	-0.157664	0.0714828	-0.306403	-0.136111	-0.00168712	-0.0270802	0.0462744	0.27204	0.373879	0.115811	0.493902	-0.149647	0.163992	-0.0275612	-0.338369	-0.485479	-0.473005	-0.0993203	-0.386516	0.0785676	-0.22744	-0.173489	0.283382
TBC1D15	brown	0.133044	-0.49091	-0.214524	0.269281	0.0438953	0.0874557	-0.0699657	0.216322	0.54933	-0.590854	-0.263116	0.176742	0.193611	0.165054	0.366987	0.666493	0.69671	-0.198998	-0.0905089	0.121299	-0.276686	0.00730599	0.126212	0.0658871	0.300467	0.325149	0.688204	0.243978	0.597265	-0.0352122	0.000342382	-0.162176	-0.291422	-0.56726	-0.297633	-0.317204	-0.392364	-0.204875	-0.222011	-0.387254	-0.126685
FYTTD1	brown	-0.133417	0.00626107	0.243622	0.37332	0.393388	0.0444814	0.100492	0.0110341	0.387854	-0.355678	-0.109734	0.101006	0.228012	0.0910835	0.40482	0.701912	0.622413	-0.00787997	-0.130189	-0.077544	-0.377662	-0.299372	-0.200498	-0.155443	0.276224	0.252792	0.28247	0.0190803	0.445397	-0.064102	-0.0753604	-0.169394	-0.447891	-0.378713	-0.129239	-0.25153	-0.264897	-0.0336415	-0.0825605	-0.112379	0.0127588
VPS26A	brown	0.130978	-0.425782	-0.195047	0.385865	0.136657	0.0174272	0.00223548	-0.0315349	0.381143	-0.677533	-0.417497	-0.0987091	0.0213029	0.136611	0.267009	0.715897	0.655752	-0.248089	-0.145202	0.0867272	-0.227599	0.00472467	0.188502	0.159109	0.244838	0.330512	0.62911	0.305655	0.652056	-0.125302	0.125122	-0.107092	-0.51497	-0.675402	-0.36979	-0.201987	-0.360901	-0.0986705	-0.202836	-0.202005	0.0427225
RNF11	brown	-0.281602	-0.0675909	0.202604	0.404531	0.355281	-0.0453656	0.0272088	-0.0355218	0.319663	-0.362619	-0.130009	0.0348736	0.164575	-0.0815977	0.350682	0.686249	0.588683	-0.00496024	-0.175972	-0.153084	-0.388141	-0.283562	-0.149592	-0.0792227	0.38639	0.458324	0.269677	0.0282078	0.467296	-0.107885	0.0383271	-0.108051	-0.335928	-0.380355	-0.0921444	-0.289105	-0.191582	0.126442	0.116429	-0.0356542	-0.0123205
ARFGEF2	brown	-0.37763	0.249748	0.508405	0.699952	0.710191	0.264091	0.433201	0.246999	0.614958	-0.16152	0.00726349	0.225088	0.192713	-0.151364	0.574069	0.790106	0.538634	-0.172785	-0.311171	-0.0761643	-0.726528	-0.466418	-0.575373	-0.378636	0.073674	0.509002	-0.0683814	-0.0552932	0.413906	-0.125578	-0.208176	-0.300936	-0.33173	-0.200401	-0.153598	-0.436333	-0.414071	0.0996178	0.115986	-0.0803614	-0.144565
RAB22A	brown	-0.214987	0.120095	0.185499	0.589823	0.551976	0.219634	0.342282	0.08097	0.4297	-0.238984	-0.0277649	0.103687	0.0612653	0.0278955	0.36559	0.719744	0.425234	-0.106748	-0.115416	0.0670363	-0.486042	-0.211709	-0.153147	-0.132971	0.279956	0.342147	0.232187	0.204447	0.553616	-0.336902	-0.124924	-0.231616	-0.427249	-0.4146	-0.359995	-0.297142	-0.420312	-0.136098	-0.163287	-0.0103767	-0.0404628
SGPP1	brown	-0.0439632	-0.30257	-0.0802364	0.49679	0.261822	0.214694	0.147602	0.214837	0.598077	-0.626957	-0.294269	0.13425	0.191195	0.0242202	0.383933	0.827372	0.718619	-0.189712	-0.1071	0.182731	-0.434037	-0.0936373	-0.0871143	0.0243316	0.219592	0.501958	0.566814	0.245916	0.709466	-0.0757885	-0.13646	-0.379488	-0.484237	-0.682971	-0.392246	-0.321796	-0.43053	-0.211084	-0.301572	-0.357713	-0.10228
SPCS3	brown	-0.177379	-0.0870943	0.144457	0.438012	0.381099	0.257888	0.22967	0.29014	0.596768	-0.329549	-0.0980314	0.233611	0.205831	0.148219	0.494485	0.735664	0.593752	-0.219746	-0.143699	0.11914	-0.459106	-0.189148	-0.1737	-0.238222	0.0829902	0.269238	0.286411	0.106368	0.489126	-0.0162496	-0.129427	-0.243958	-0.338737	-0.432834	-0.277828	-0.410296	-0.500918	-0.0878458	-0.150363	-0.270718	-0.0633467
ITFG1	brown	-0.291642	0.0640386	0.257363	0.758324	0.596434	0.339956	0.498195	0.314912	0.608332	-0.224429	-0.0461978	0.225652	0.153156	-0.0946635	0.50978	0.787708	0.42218	-0.364762	-0.311896	0.126517	-0.658752	-0.207484	-0.280493	-0.263158	0.051577	0.481828	0.040919	0.238723	0.616083	-0.167879	-0.304213	-0.403633	-0.232989	-0.379755	-0.273361	-0.44912	-0.578533	0.0035198	-0.072746	-0.185617	-0.0455667
ASH2L	brown	0.0198654	0.0937953	0.10285	0.609431	0.533834	0.490696	0.518221	0.334041	0.658662	-0.210213	0.0438829	0.327699	0.255369	0.247512	0.486014	0.742632	0.441718	-0.293217	-0.0546259	0.352705	-0.558981	-0.0744366	-0.125593	0.123413	0.0851456	0.143866	0.36226	0.34177	0.631262	-0.183854	-0.277991	-0.379228	-0.55827	-0.518707	-0.454322	-0.479817	-0.655873	-0.502544	-0.474096	-0.34471	-0.305741
RLIM	brown	-0.356134	0.13455	0.313956	0.759051	0.649231	0.165526	0.46307	-0.00335322	0.373793	-0.165351	0.0649824	0.12082	0.14363	-0.0255326	0.49881	0.782699	0.425649	-0.332336	-0.39217	-0.0177149	-0.617288	-0.345015	-0.321021	-0.122949	0.0910882	0.38471	0.0659573	0.17342	0.589539	-0.293803	-0.257593	-0.337026	-0.35341	-0.356647	-0.394638	-0.190311	-0.413668	0.0451967	-0.0795395	0.0456755	0.136925
WDR44	brown	-0.248621	0.237099	0.517499	0.453502	0.602923	0.226504	0.275245	0.26523	0.646592	-0.141179	0.0688171	0.32459	0.335168	0.211074	0.6402	0.745496	0.622508	-0.0850361	-0.231811	-0.0893156	-0.646624	-0.405518	-0.353599	-0.183424	0.187419	0.227755	0.0742121	-0.0525505	0.366522	0.0399295	-0.26434	-0.273506	-0.304812	-0.325162	-0.095826	-0.55534	-0.431825	-0.179482	-0.0526854	-0.287849	-0.339195
DCTN4	brown	-0.198951	-0.0965876	0.0350276	0.580162	0.375719	0.251782	0.300566	0.135363	0.48729	-0.318388	0.0374117	0.291691	0.269613	-0.0916908	0.404317	0.724347	0.493615	-0.297394	-0.207447	0.173608	-0.493382	-0.143087	-0.265139	0.147878	0.0606954	0.364712	0.414901	0.302748	0.690496	-0.07995	-0.297213	-0.394714	-0.503473	-0.515482	-0.40397	-0.233009	-0.337018	-0.278983	-0.35697	-0.3615	-0.13953
CDK8	brown	-0.113815	-0.125927	0.00216941	0.65101	0.446678	0.28686	0.395403	0.165658	0.518889	-0.369333	-0.0405762	0.269395	0.218056	-0.013622	0.443701	0.772456	0.511003	-0.470121	-0.297492	0.191087	-0.5208	-0.121772	-0.146972	0.142196	0.127912	0.315499	0.41154	0.341529	0.70829	-0.0362221	-0.23081	-0.429039	-0.444055	-0.539348	-0.456455	-0.33588	-0.471283	-0.335696	-0.396802	-0.368623	-0.192537
GPALPP1	brown	-0.21806	0.140989	0.510522	0.495187	0.589394	0.137197	0.244158	0.211925	0.565612	0.0567918	0.299297	0.481415	0.456759	0.193986	0.77738	0.710664	0.581458	-0.340771	-0.406973	-0.170963	-0.661117	-0.478428	-0.47311	-0.078661	0.1363	0.160397	0.0777226	-0.114837	0.31454	0.0134851	-0.269859	-0.229878	-0.338525	-0.209013	-0.127654	-0.465144	-0.37717	-0.251435	-0.0595166	-0.288355	-0.398874
KRAS	brown	-0.372303	0.22	0.538685	0.620241	0.683808	-0.0645305	0.285081	-0.189923	0.283063	-0.0104744	0.129663	0.0565675	0.139708	0.0851334	0.622368	0.750882	0.52463	-0.421586	-0.586257	-0.348584	-0.579649	-0.586037	-0.453204	-0.18279	-0.0297016	0.138249	-0.0724578	-0.115097	0.343199	-0.235698	-0.076017	-0.0310078	-0.417981	-0.151163	-0.190843	-0.12439	-0.235983	0.220961	0.157003	0.0513043	0.103754
IMPA1	brown	-0.204593	-0.195836	0.0945326	0.605466	0.382137	-0.0149518	0.188551	-0.108344	0.299478	-0.340289	-0.126592	-0.00135916	0.0958202	0.0506531	0.437471	0.756017	0.570468	-0.467769	-0.38718	-0.0444693	-0.377239	-0.22034	-0.152685	-0.0987053	0.108234	0.31535	0.292453	0.175755	0.594743	-0.298899	-0.114832	-0.168261	-0.460842	-0.453001	-0.384617	-0.00592872	-0.284444	0.0392474	-0.0959123	-0.0957713	0.155047
NAPG	brown	-0.208139	0.108022	0.313012	0.821035	0.699649	0.320726	0.553025	0.285392	0.629719	-0.0391654	0.249208	0.394563	0.279928	0.289295	0.658395	0.810939	0.40808	-0.484158	-0.4519	0.0728288	-0.72907	-0.29515	-0.348766	-0.159104	0.113595	0.278497	0.135074	0.311838	0.681564	-0.337995	-0.473964	-0.441233	-0.389443	-0.423469	-0.408996	-0.407054	-0.589337	-0.23033	-0.213154	-0.157206	-0.147491
ROCK2	brown	-0.115586	-0.0422443	0.205755	0.607882	0.51792	0.143001	0.276248	0.0811882	0.475188	-0.41581	-0.17054	0.115085	0.144495	-0.0432577	0.454888	0.805371	0.619573	-0.287289	-0.298216	-0.0364525	-0.539141	-0.334388	-0.25674	-0.0722567	0.292441	0.473709	0.252195	0.0513655	0.530748	-0.0839776	-0.0953457	-0.295729	-0.47141	-0.479909	-0.225239	-0.321643	-0.37893	-0.0743144	-0.12116	-0.158837	-0.066588
KIAA1468	brown	-0.12303	0.194687	0.368684	0.615264	0.638938	0.365815	0.45902	0.387629	0.706191	0.104074	0.425691	0.62845	0.475037	0.19728	0.741701	0.74777	0.497917	-0.379106	-0.342036	0.0601141	-0.777493	-0.378979	-0.448552	-0.022296	0.14385	0.156733	0.214278	0.122864	0.518343	-0.159621	-0.382754	-0.376025	-0.341719	-0.264991	-0.282512	-0.565742	-0.569007	-0.434511	-0.275527	-0.370281	-0.461615
BTF3L4	brown	-0.317186	0.0691954	0.310686	0.692487	0.628327	0.21162	0.375166	0.139035	0.590043	-0.184539	0.0904541	0.249043	0.198679	0.21447	0.591287	0.824311	0.526384	-0.461283	-0.42518	-1.45e-05	-0.630472	-0.26633	-0.251169	-0.0692718	0.0494605	0.18098	0.221735	0.284089	0.653584	-0.260655	-0.241317	-0.298137	-0.511191	-0.370187	-0.365724	-0.403646	-0.531357	-0.150474	-0.104947	-0.196277	-0.154429
TMED7	brown	-0.06315	-0.310403	-0.0724361	0.215606	0.0573496	0.119983	-0.0421291	0.17838	0.480203	-0.685166	-0.420446	0.029943	0.180655	-0.0192304	0.259476	0.659589	0.722043	0.106041	0.0676005	0.150033	-0.232226	-0.0244057	-0.0267376	-0.138378	0.135129	0.501331	0.506229	0.128985	0.539964	0.121681	-0.133272	-0.335252	-0.285366	-0.636199	-0.227134	-0.21709	-0.209252	-0.0308561	-0.16705	-0.393806	-0.0153931
FBXO21	brown	-0.176654	0.052078	0.229027	0.586936	0.472424	0.185701	0.36621	0.0435719	0.367022	-0.245126	0.0161626	0.191151	0.301531	-0.0390177	0.522796	0.718277	0.514853	-0.23332	-0.254232	0.0648468	-0.508534	-0.277896	-0.308876	-0.060838	-0.0112709	0.411217	0.189615	0.109258	0.556514	0.00812806	-0.38802	-0.507341	-0.447201	-0.542383	-0.408877	-0.076239	-0.192507	-0.0970354	-0.280644	-0.268919	0.0439819
MAP3K7	brown	-0.123477	-0.11467	0.119971	0.586318	0.472864	0.278048	0.325697	0.215122	0.639965	-0.344293	-0.0542945	0.228513	0.17022	0.116997	0.594906	0.85205	0.660638	-0.380579	-0.296193	0.11143	-0.616451	-0.238509	-0.193607	-0.0367406	0.0936756	0.326183	0.401645	0.196292	0.632932	-0.114522	-0.125442	-0.281212	-0.399931	-0.569179	-0.51331	-0.382251	-0.564719	-0.235893	-0.319707	-0.384134	-0.0867326
USP15	brown	-0.0918186	-0.108335	0.213327	0.604506	0.448789	-0.0515754	0.221592	-0.124145	0.292397	-0.241512	0.0347827	0.0870095	0.218085	0.183904	0.5716	0.74912	0.535147	-0.393529	-0.5143	-0.171481	-0.549698	-0.397966	-0.233587	-0.0144238	0.0265411	0.312216	0.240237	0.110969	0.576598	-0.262242	-0.162854	-0.208111	-0.363483	-0.451773	-0.382659	-0.108604	-0.344182	0.125652	-0.0495349	0.0513187	0.266653
CAB39	brown	-0.238046	0.259118	0.436557	0.657063	0.733395	0.209527	0.418713	0.122353	0.537767	-0.0955801	0.017417	0.0729629	0.0114934	0.195153	0.531501	0.766065	0.445854	-0.248625	-0.343674	-0.0970007	-0.668474	-0.405541	-0.301492	-0.214974	0.143446	0.224398	0.0103456	0.0850372	0.447664	-0.426035	-0.0901038	-0.0867427	-0.35006	-0.247181	-0.317739	-0.410642	-0.565132	0.00663953	-0.0124422	0.118643	0.0093909
VPS36	brown	-0.243993	0.217979	0.57269	0.527902	0.652001	0.0571615	0.290934	-0.0019772	0.408528	0.173685	0.387106	0.44754	0.47239	0.285663	0.828553	0.711377	0.569559	-0.503714	-0.500848	-0.230829	-0.599451	-0.535566	-0.496464	-0.141136	-0.00827035	-0.0579502	0.0105191	-0.160855	0.266899	0.0353367	-0.286475	-0.159287	-0.496756	-0.137278	-0.113277	-0.308999	-0.28155	-0.159705	0.0148131	-0.224582	-0.312481
RANBP6	brown	-0.261106	0.163421	0.301717	0.68918	0.647094	0.344327	0.489905	0.276367	0.621499	-0.199412	-0.0950418	0.101225	-0.0404376	-0.0521459	0.426608	0.701678	0.356355	-0.456099	-0.348239	0.0727656	-0.611037	-0.221579	-0.285748	-0.164022	-0.0792156	0.228211	-0.00999343	0.227037	0.503909	-0.283576	-0.0856358	-0.196787	-0.323028	-0.162271	-0.254862	-0.431406	-0.590516	0.0288037	-0.0171004	-0.164907	-0.0531073
FAM8A1	brown	-0.0694712	0.0751429	0.185545	0.523737	0.500428	0.259492	0.295747	0.126382	0.574037	-0.359899	-0.167474	0.0826352	0.0740571	0.0901514	0.419386	0.776805	0.602831	-0.172523	-0.172851	0.0752103	-0.548874	-0.2501	-0.286932	-0.0383403	-0.0624548	0.357085	0.307543	0.136662	0.543157	-0.255506	-0.185798	-0.292027	-0.523866	-0.478552	-0.396948	-0.315782	-0.398316	-0.185875	-0.218936	-0.309233	-0.191098
HAUS2	brown	-0.138096	0.117302	0.363389	0.626498	0.531664	0.213208	0.355871	0.245335	0.506623	-0.0912387	0.218241	0.404677	0.425944	0.212645	0.597684	0.694405	0.446639	-0.187377	-0.304519	0.00362337	-0.599441	-0.349264	-0.435424	-0.214364	0.0997889	0.395571	0.11383	0.103473	0.530805	-0.0478066	-0.587585	-0.580178	-0.481392	-0.480221	-0.282377	-0.253917	-0.303798	-0.184165	-0.146207	-0.207456	-0.147965
ACTR2	brown	-0.3852	0.133198	0.36613	0.671664	0.613365	0.166449	0.371398	0.0660571	0.454808	-0.286714	-0.0873128	0.0913575	0.176715	-0.085198	0.491285	0.812271	0.538995	-0.16625	-0.300057	-0.0414512	-0.654427	-0.380354	-0.383868	-0.206904	0.123535	0.543454	0.0741692	0.0654923	0.548349	-0.239011	-0.245939	-0.327089	-0.326266	-0.396377	-0.296362	-0.300175	-0.38897	0.11586	0.00361129	0.0512055	0.0868513
PREPL	brown	-0.191342	-0.157307	0.0160364	0.719218	0.465449	0.313678	0.411359	0.279347	0.600404	-0.322201	-0.0504803	0.227142	0.129831	0.0699002	0.459766	0.789282	0.472425	-0.514532	-0.333503	0.19353	-0.584008	-0.127799	-0.142364	-0.045663	0.144883	0.370167	0.322863	0.334378	0.703779	-0.237212	-0.214191	-0.358147	-0.30339	-0.442543	-0.459964	-0.403345	-0.63079	-0.156299	-0.239267	-0.163318	-0.0517566
ATAD1	brown	-0.2581	-0.16463	0.298197	0.542486	0.396076	-0.119997	0.134472	-0.0751169	0.275735	-0.23028	0.0649258	0.256918	0.453879	-0.0368723	0.627444	0.728968	0.619952	-0.4272	-0.52617	-0.212595	-0.484781	-0.345754	-0.241761	-0.0126191	0.201948	0.358659	0.172078	0.0426639	0.5106	0.0946867	-0.200367	-0.228212	-0.205229	-0.363331	-0.0474802	-0.207427	-0.166441	0.119463	0.0651552	-0.219193	0.0100198
AP1AR	brown	-0.170029	-0.159273	0.134922	0.478359	0.354467	0.0407634	0.106036	0.050755	0.429951	-0.436946	-0.148822	0.113781	0.23935	0.170515	0.453294	0.770939	0.658498	-0.104186	-0.19304	-0.00862777	-0.414202	-0.162873	-0.0620048	-0.162849	0.275372	0.449083	0.380939	0.192145	0.613821	-0.0663112	-0.213971	-0.309786	-0.379631	-0.569738	-0.227989	-0.307851	-0.334126	-0.0687542	-0.0575962	-0.0761111	-0.0567737
BBS7	brown	-0.29601	0.134316	0.4052	0.702358	0.639068	0.255717	0.447535	0.290595	0.611046	-0.0199691	0.205003	0.443893	0.375342	-0.0701326	0.665057	0.761626	0.481941	-0.43686	-0.411228	-0.0275669	-0.703112	-0.39616	-0.440373	-0.173013	0.127788	0.248177	0.00686826	0.0605623	0.482691	-0.0923344	-0.269991	-0.231916	-0.204971	-0.165185	-0.121155	-0.454508	-0.510725	-0.0899383	-0.0795533	-0.310515	-0.181617
USO1	brown	-0.319346	0.199824	0.517524	0.717547	0.703828	0.0763488	0.410002	-0.000451793	0.390292	-0.011325	0.211761	0.273076	0.288738	0.0740679	0.672277	0.748958	0.450543	-0.451805	-0.558142	-0.201633	-0.698094	-0.48556	-0.448916	-0.202096	0.0257061	0.264598	-0.0764799	0.0476892	0.484136	-0.168344	-0.335527	-0.298018	-0.301788	-0.236521	-0.201395	-0.289686	-0.357958	0.0902963	0.0571593	-0.0859833	0.0153773
SEC24B	brown	-0.116348	-0.047545	0.372281	0.405733	0.406509	-0.15337	0.0653272	-0.218694	0.26092	-0.243647	-0.0508465	0.034464	0.257371	0.283824	0.640781	0.723961	0.724258	-0.408479	-0.551551	-0.318315	-0.448939	-0.52175	-0.307819	0.0126106	-0.0714086	0.149286	0.187325	-0.166618	0.353813	0.00750731	-0.191391	-0.142626	-0.509628	-0.469701	-0.320185	0.0177222	-0.0955531	0.163267	0.00156697	-0.218306	0.169611
ETNK1	brown	-0.251623	-0.0547592	0.200325	0.560961	0.500049	0.154245	0.277463	0.0473268	0.516979	-0.303748	-0.115143	0.0368365	0.00391742	0.111442	0.559748	0.806129	0.624009	-0.434935	-0.353147	-0.0258683	-0.543119	-0.317029	-0.214673	-0.178009	0.0152517	0.16994	0.241012	0.083369	0.503162	-0.263261	0.0231645	-0.0730027	-0.338032	-0.348253	-0.485171	-0.182418	-0.503863	-0.0370078	-0.208476	-0.172201	0.132572
TMTC3	brown	-0.0810678	-0.291595	-0.0712403	0.334856	0.163514	0.159641	0.0545971	0.205602	0.502971	-0.612155	-0.329577	0.117699	0.143161	-0.233	0.260752	0.658504	0.653882	-0.019677	-0.00770251	0.121752	-0.319303	-0.0567708	-0.0869717	-0.0631449	0.323441	0.534971	0.469643	0.141807	0.518853	0.0998976	0.0718092	-0.226355	-0.224385	-0.470247	-0.135057	-0.367246	-0.283309	-0.101138	-0.0982682	-0.323789	-0.206525
TDG	brown	0.0680472	-0.284406	-0.062293	0.30864	0.171234	0.134922	0.0495013	0.175213	0.497884	-0.377556	0.0120167	0.357771	0.450867	0.23626	0.502185	0.690206	0.658761	-0.163566	-0.143874	0.116836	-0.44076	-0.144238	-0.0995045	0.240366	0.154455	0.317678	0.617913	0.213332	0.642573	0.0369939	-0.299995	-0.368527	-0.34801	-0.597331	-0.314842	-0.377907	-0.32609	-0.279005	-0.289102	-0.394794	-0.194831
NUPL1	brown	-0.134579	-0.070442	0.226962	0.354056	0.358664	0.0828248	0.142633	0.0280631	0.423492	-0.300254	0.00706246	0.266218	0.410549	0.129314	0.632759	0.768315	0.754896	-0.204157	-0.219726	-0.0201656	-0.47081	-0.355521	-0.283592	-0.0639439	0.0636229	0.193754	0.369302	-0.049874	0.461956	0.0822054	-0.216271	-0.271432	-0.343193	-0.494937	-0.366883	-0.158338	-0.25375	-0.14288	-0.316616	-0.417727	0.00436712
MTMR6	brown	-0.212373	-0.0920184	0.130867	0.699662	0.52188	0.360905	0.384404	0.357389	0.742615	-0.439554	-0.0868128	0.340346	0.294606	0.0114753	0.541881	0.925805	0.65613	-0.273309	-0.198709	0.204711	-0.656685	-0.18249	-0.263578	-0.11096	0.248574	0.508326	0.389619	0.29993	0.777318	-0.104418	-0.331548	-0.466129	-0.408765	-0.583292	-0.388435	-0.511696	-0.602859	-0.265264	-0.320443	-0.356065	-0.194452
RPRD1A	brown	-0.241843	0.236285	0.413612	0.506289	0.666285	0.263285	0.316921	0.174932	0.637061	-0.25155	-0.0822124	0.129658	0.0565207	0.0154039	0.500497	0.789233	0.632339	-0.136535	-0.179154	-0.061907	-0.619587	-0.407071	-0.355952	-0.187298	0.303032	0.219425	0.143161	-0.0595811	0.359983	-0.15524	0.0568144	-0.0559891	-0.409617	-0.230711	-0.240516	-0.476239	-0.495744	-0.189877	-0.144386	-0.202428	-0.246656
PIGK	brown	-0.211525	-0.013606	0.219755	0.624026	0.53058	0.32803	0.379565	0.415762	0.752496	-0.28736	-0.0638938	0.269005	0.121426	0.100408	0.519555	0.779294	0.522812	-0.36359	-0.292898	0.0883175	-0.618064	-0.200758	-0.181804	-0.171823	0.163109	0.243749	0.189511	0.235392	0.574416	-0.200324	-0.138844	-0.234183	-0.23489	-0.314232	-0.253104	-0.52431	-0.658728	-0.11874	-0.142612	-0.365499	-0.166008
CEP170	brown	-0.189942	0.207853	0.45039	0.602247	0.692379	0.360065	0.406705	0.368045	0.789194	-0.079274	0.227995	0.491678	0.391765	0.215695	0.750286	0.860149	0.660791	-0.280622	-0.323995	-0.00151566	-0.845395	-0.494881	-0.530772	-0.118595	0.175758	0.272754	0.208228	-0.0151332	0.49296	-0.128242	-0.307226	-0.328224	-0.371313	-0.329625	-0.362381	-0.586116	-0.592833	-0.31719	-0.250139	-0.332495	-0.349918
FBXO28	brown	-0.197688	0.0749499	0.264846	0.508806	0.501779	0.24421	0.259644	0.210826	0.593889	-0.273206	-0.0969314	0.136646	0.0969776	-0.0272861	0.447056	0.73666	0.549103	-0.255008	-0.219267	0.0184687	-0.581535	-0.317712	-0.32311	-0.077381	0.0195363	0.251955	0.204317	0.0389259	0.442884	-0.141969	0.00987286	-0.107212	-0.488273	-0.249108	-0.280778	-0.426844	-0.520246	-0.0561612	-0.122664	-0.194431	-0.0663824
HNRNPLL	brown	0.0263159	-0.26189	0.0523483	0.284606	0.209063	-0.0658263	-0.036427	-0.135881	0.323739	-0.55357	-0.401099	-0.219534	-0.0346367	0.336732	0.3948	0.693916	0.700365	-0.195678	-0.225461	-0.0757535	-0.24582	-0.148068	0.126012	-0.0375008	0.0260407	0.202633	0.41138	0.0948015	0.472009	-0.0927407	0.0847051	-0.0577523	-0.401672	-0.632428	-0.412344	-0.0952673	-0.286214	0.0807215	-0.103381	-0.115172	0.224989
KIAA1715	brown	-0.341454	0.19468	0.488694	0.679702	0.698324	0.188529	0.425818	0.163973	0.562605	0.0107521	0.261194	0.419707	0.365581	0.0752199	0.708296	0.80678	0.571987	-0.470071	-0.532921	-0.135066	-0.772133	-0.525065	-0.502222	-0.0668223	0.205067	0.274259	0.0582958	-0.0361176	0.443045	-0.118064	-0.362413	-0.285878	-0.311827	-0.260667	-0.21042	-0.377294	-0.418683	-0.147089	-0.106525	-0.250385	-0.219116
UBR3	brown	-0.16617	0.0226165	0.202679	0.716121	0.588678	0.429265	0.473181	0.410037	0.775904	-0.338591	-0.0129808	0.396036	0.304607	0.0381886	0.593073	0.895366	0.626146	-0.234864	-0.197754	0.209049	-0.735222	-0.226995	-0.331818	-0.156915	0.199728	0.520023	0.32314	0.254677	0.713063	-0.0839425	-0.390308	-0.523054	-0.377169	-0.54603	-0.385753	-0.549572	-0.591968	-0.332612	-0.325305	-0.362531	-0.297133
2019-03-06	brown	-0.230057	0.117321	0.336808	0.545139	0.548575	0.228891	0.368959	0.109721	0.534633	-0.0504039	0.157767	0.268259	0.268826	0.0900255	0.657252	0.762695	0.607306	-0.425745	-0.404509	-0.0215233	-0.671636	-0.423159	-0.440906	-0.0432383	-0.0196623	0.208888	0.196704	-0.0194656	0.436224	-0.15012	-0.208528	-0.205182	-0.283396	-0.291099	-0.417312	-0.265305	-0.367373	-0.101	-0.192674	-0.296797	-0.106776
ATG12	brown	-0.227367	-0.0954885	0.156473	0.672571	0.513635	0.154262	0.281582	0.211426	0.592138	-0.208195	0.158782	0.351272	0.222791	0.147476	0.552579	0.762256	0.507393	-0.361821	-0.447422	-0.0503475	-0.659865	-0.29221	-0.282825	0.00405124	0.187393	0.399475	0.340991	0.267311	0.647654	-0.247071	-0.241569	-0.356159	-0.463909	-0.399642	-0.39587	-0.376384	-0.481584	-0.225254	-0.158088	-0.147118	-0.196455
YIPF5	brown	-0.172184	0.271527	0.609934	0.508501	0.658743	0.139836	0.301453	0.178648	0.561799	-0.106274	0.018753	0.224019	0.240163	0.0858754	0.636129	0.694551	0.551574	-0.20503	-0.354904	-0.225904	-0.632129	-0.511213	-0.475618	-0.301415	0.0846113	0.175203	-0.12768	-0.163874	0.246948	-0.0595314	-0.116741	-0.125969	-0.318275	-0.145015	0.0325896	-0.450178	-0.376917	0.0590647	0.147167	-0.220483	-0.21418
FBXO38	brown	-0.108547	0.136744	0.365441	0.584046	0.566543	0.287399	0.369598	0.389997	0.690678	-0.0559475	0.244447	0.517559	0.508053	0.239238	0.682646	0.751287	0.547918	-0.182374	-0.301182	0.00020261	-0.73206	-0.401197	-0.42424	-0.0998212	0.181198	0.349775	0.202254	0.0609047	0.514986	-0.104029	-0.459604	-0.424254	-0.336651	-0.389199	-0.229313	-0.524464	-0.452316	-0.209747	-0.124087	-0.297756	-0.346622
TERF1	brown	-0.0803118	-0.0354221	0.230127	0.513175	0.443716	0.0618477	0.235878	-0.00625262	0.397472	-0.0755494	0.250161	0.356274	0.411489	0.375792	0.666427	0.731834	0.578748	-0.445331	-0.420237	-0.0556526	-0.528496	-0.296688	-0.216132	0.0938571	0.113132	0.133965	0.353356	0.18147	0.586399	-0.122144	-0.364032	-0.339124	-0.467019	-0.523543	-0.357888	-0.215405	-0.27555	-0.274752	-0.252638	-0.375474	-0.210545
LRP12	brown	-0.16581	-0.29619	-0.0712932	0.509208	0.216792	0.126282	0.148229	0.151249	0.424639	-0.587221	-0.278168	0.147443	0.267975	-0.156467	0.298888	0.713384	0.596915	-0.118665	-0.138969	0.1472	-0.392667	-0.0692144	-0.118932	-0.0730671	0.226633	0.731151	0.412756	0.236739	0.679435	0.0791386	-0.368889	-0.551444	-0.299437	-0.67285	-0.26691	-0.237803	-0.254496	-0.0568419	-0.131735	-0.249135	-0.0519608
HERC4	brown	-0.134468	-0.153556	0.0527262	0.610038	0.44425	0.133585	0.261068	0.0452251	0.456158	-0.238604	0.0610959	0.214919	0.132287	0.14763	0.519532	0.780328	0.555034	-0.461644	-0.409511	0.00680686	-0.532551	-0.25672	-0.200687	0.0250552	0.105255	0.321021	0.412209	0.22084	0.630011	-0.222531	-0.184631	-0.27096	-0.508524	-0.517078	-0.481858	-0.246922	-0.41906	-0.178225	-0.242259	-0.196256	-0.0553854
AASDHPPT	brown	-0.0888704	-0.253925	-0.0431348	0.567559	0.331475	0.238726	0.240084	0.195637	0.589592	-0.420116	-0.083384	0.262122	0.275058	0.146891	0.479314	0.827067	0.632035	-0.406716	-0.233986	0.206151	-0.505613	-0.0875726	-0.129332	0.0742902	0.0709779	0.34165	0.54717	0.354015	0.776684	-0.198473	-0.271407	-0.337739	-0.449407	-0.617747	-0.472529	-0.356964	-0.497353	-0.216822	-0.294398	-0.364142	-0.116224
MTMR12	brown	-0.100067	0.232037	0.498344	0.352905	0.5292	0.0861989	0.157168	0.0453628	0.449131	-0.0896082	0.0889926	0.211018	0.331513	0.263735	0.629917	0.707898	0.685434	-0.0867622	-0.229518	-0.192291	-0.552411	-0.560995	-0.450947	-0.133823	0.133431	0.164596	0.131177	-0.297357	0.209602	0.00347298	-0.153666	-0.167124	-0.610971	-0.341122	-0.190557	-0.284642	-0.255035	-0.0580824	-0.0202834	-0.185914	-0.171737
CSNK1G3	brown	-0.104617	-0.275669	0.0302971	0.540985	0.340754	0.0699916	0.130903	0.0600365	0.508914	-0.527635	-0.206747	0.10265	0.178049	0.116914	0.458406	0.837282	0.720446	-0.347809	-0.358224	-0.0176785	-0.491786	-0.228624	-0.114763	0.0491181	0.241845	0.433618	0.480722	0.2002	0.681868	-0.0676617	-0.104621	-0.263362	-0.441269	-0.645228	-0.377712	-0.310344	-0.400145	-0.099158	-0.183979	-0.296297	-0.0486451
SACS	brown	-0.284325	0.205779	0.382111	0.670786	0.707848	0.426729	0.502617	0.380726	0.776738	-0.0912752	0.123116	0.347334	0.155812	0.14961	0.622635	0.817012	0.533478	-0.352306	-0.298644	0.0757093	-0.761875	-0.379097	-0.448203	-0.249834	0.168447	0.23872	0.12281	0.0973616	0.502305	-0.225144	-0.211019	-0.222976	-0.286023	-0.258681	-0.355176	-0.544611	-0.648497	-0.235816	-0.231485	-0.253592	-0.235405
GPATCH11	brown	-0.0859697	-0.143848	0.241195	0.420691	0.376441	-0.00310635	0.0323498	0.117692	0.522985	-0.313583	0.0400222	0.336863	0.447892	0.215917	0.601491	0.762579	0.748773	-0.257423	-0.375798	-0.154939	-0.567209	-0.37838	-0.311449	0.0912883	0.272568	0.366282	0.439361	0.011118	0.512835	0.00498407	-0.222748	-0.281918	-0.492854	-0.476262	-0.17909	-0.374415	-0.270568	-0.25587	-0.0973938	-0.282935	-0.347937
TRAPPC8	brown	-0.276803	0.273244	0.566021	0.525219	0.668555	0.160372	0.288846	0.12717	0.578404	-0.0335105	0.197919	0.311111	0.285862	0.105386	0.655897	0.75457	0.612844	-0.146853	-0.368487	-0.217787	-0.75107	-0.585562	-0.585402	-0.125326	0.250731	0.329454	0.0506635	-0.156288	0.337968	-0.183724	-0.212977	-0.173145	-0.314997	-0.247218	-0.184087	-0.439898	-0.347752	-0.0996716	-0.019206	-0.199105	-0.276811
NUS1	brown	-0.121095	-0.0958391	0.139971	0.308353	0.318716	-0.0600741	-0.00921797	-0.189482	0.297299	-0.453818	-0.277789	-0.150411	0.00280833	0.0618016	0.370312	0.719929	0.685435	-0.144491	-0.216502	-0.148562	-0.325432	-0.306453	-0.139592	-0.0641835	-0.0194537	0.234709	0.369008	-0.0126064	0.428934	-0.167159	0.158424	0.00618986	-0.475514	-0.446484	-0.313896	-0.11147	-0.206141	0.127006	-0.0126077	-0.120861	0.126495
PPP2R5E	brown	-0.246312	0.135968	0.274909	0.64418	0.620765	0.211701	0.393289	-0.00955792	0.443671	-0.294398	-0.09914	0.0708168	0.0889844	-0.055085	0.492386	0.815562	0.557522	-0.287459	-0.281809	0.0102402	-0.585557	-0.339883	-0.29953	-0.0836123	0.0334908	0.353688	0.176656	0.0931037	0.543876	-0.131671	-0.122644	-0.28236	-0.507179	-0.455661	-0.423179	-0.263386	-0.397607	-0.138243	-0.23249	-0.14203	-0.0394541
TOMM70A	brown	-0.198673	0.175326	0.338185	0.824007	0.751829	0.334087	0.547827	0.238317	0.625604	-0.108019	0.171638	0.353066	0.269343	0.12863	0.630492	0.858643	0.474817	-0.439213	-0.375081	0.0787511	-0.745873	-0.334676	-0.379033	-0.0770067	0.093018	0.306287	0.187534	0.240435	0.64812	-0.29566	-0.304222	-0.409982	-0.596182	-0.374716	-0.406919	-0.454549	-0.600554	-0.270784	-0.221687	-0.137611	-0.21819
TMEM55A	brown	-0.303314	0.122016	0.317365	0.574464	0.587067	0.251968	0.377029	0.139658	0.551667	-0.263904	-0.158732	0.0411709	0.00847528	0.0417456	0.491099	0.753261	0.510863	-0.32322	-0.219851	0.0504897	-0.480399	-0.187857	-0.181033	-0.328614	0.00753598	0.142247	0.0347862	0.14961	0.459122	-0.205658	-0.0648086	-0.139746	-0.334392	-0.241193	-0.232218	-0.316873	-0.47892	-0.0349878	-0.0993734	-0.208461	-0.0478888
HSPA13	brown	-0.193308	-0.160921	0.180064	0.33627	0.261763	-0.0451195	0.0239363	-0.08175	0.31651	-0.530978	-0.358373	-0.080786	0.121883	-0.0488782	0.401101	0.720335	0.727691	-0.140445	-0.240314	-0.106963	-0.336816	-0.283045	-0.15412	-0.178023	0.0592596	0.397895	0.24226	-0.0684	0.409051	0.111695	-0.061011	-0.157334	-0.269668	-0.46744	-0.2115	-0.1004	-0.192915	0.19887	0.00260352	-0.132762	0.204668
FAM126B	brown	-0.232653	0.179579	0.488925	0.581512	0.680319	0.100909	0.326051	-0.00164192	0.478012	0.0242951	0.248239	0.283735	0.263559	0.254834	0.774097	0.790715	0.608381	-0.48198	-0.510245	-0.200596	-0.680924	-0.538089	-0.400958	-0.132138	0.0418554	0.0277603	0.105632	-0.0976368	0.350193	-0.147303	-0.0671199	-0.105801	-0.476305	-0.203202	-0.346477	-0.32093	-0.45382	-0.10445	-0.093905	-0.103586	-0.102956
VPS37A	brown	-0.0362016	-0.361167	-0.126803	0.444516	0.216541	0.222979	0.148201	0.278308	0.604202	-0.522954	-0.124421	0.334179	0.333894	0.121406	0.449468	0.772676	0.671839	-0.277266	-0.141323	0.224211	-0.418484	0.00479362	-0.0086777	0.0350059	0.201043	0.393595	0.633013	0.390415	0.777954	-0.016255	-0.226449	-0.411328	-0.289313	-0.629069	-0.289496	-0.408062	-0.413859	-0.279001	-0.300218	-0.512943	-0.209027
PSD3	brown	-0.212472	0.293761	0.425813	0.600375	0.672923	0.30523	0.425429	0.243666	0.574619	0.0652516	0.326133	0.419152	0.305134	0.188277	0.649226	0.71894	0.435334	-0.179171	-0.281056	-0.019857	-0.749431	-0.492631	-0.534886	-0.120494	0.0172565	0.253453	0.100588	-0.0229883	0.420961	-0.247835	-0.388825	-0.361615	-0.516953	-0.328175	-0.433426	-0.357535	-0.482685	-0.237371	-0.251736	-0.117851	-0.137831
NPTN	brown	-0.162714	-0.181512	0.0637278	0.637248	0.394742	0.135406	0.256995	0.173009	0.484944	-0.335686	-0.117964	0.0978534	0.103852	0.122984	0.415287	0.750728	0.480998	-0.418466	-0.372577	0.0424549	-0.50843	-0.177176	-0.132566	-0.139458	0.1139	0.412156	0.260017	0.261257	0.649155	-0.339872	-0.173739	-0.265798	-0.319733	-0.447634	-0.338234	-0.322294	-0.509925	0.096005	0.00709454	-0.0222645	0.0705395
BAG4	brown	-0.278661	-0.0992291	0.203343	0.53902	0.446362	0.0143544	0.185802	-0.0190957	0.3898	-0.24833	-0.0027085	0.114732	0.176733	0.196251	0.562575	0.76897	0.618854	-0.411135	-0.382781	-0.0844133	-0.467993	-0.290306	-0.131703	-0.107296	0.199041	0.152774	0.283662	0.115816	0.531294	-0.183329	-0.060322	-0.107564	-0.354771	-0.340574	-0.347075	-0.1721	-0.381731	-0.0213526	-0.0916796	-0.0455163	0.0782351
HIAT1	brown	-0.133189	0.079954	0.303488	0.534579	0.54764	0.314017	0.341311	0.283752	0.695019	-0.367631	-0.215764	0.0885877	0.0542791	0.0749053	0.528849	0.794992	0.63314	-0.210436	-0.209327	0.0510909	-0.620358	-0.284483	-0.243961	-0.160795	0.0254251	0.347729	0.170454	0.0606351	0.471656	-0.152743	-0.0648688	-0.222616	-0.300847	-0.409143	-0.289441	-0.43722	-0.52763	-0.0441619	-0.101752	-0.321152	-0.1045
APPL1	brown	-0.170658	-0.0602337	0.247177	0.577107	0.504388	0.089022	0.216802	0.0326052	0.492086	-0.423813	-0.162086	0.135611	0.232355	-0.00794523	0.541291	0.863762	0.733034	-0.262863	-0.2982	-0.060046	-0.531035	-0.339958	-0.240493	-0.0503521	0.228284	0.382438	0.309001	0.0488142	0.548446	-0.0749331	-0.0881462	-0.231368	-0.47136	-0.461898	-0.256405	-0.291041	-0.386396	-0.0792334	-0.109114	-0.160025	-0.0609672
DYRK1A	brown	-0.106508	0.245592	0.447373	0.509768	0.585871	0.18731	0.262657	0.188407	0.572184	-0.157863	0.075983	0.271463	0.287835	0.0441488	0.545838	0.721147	0.567841	0.0196837	-0.218775	-0.119435	-0.689467	-0.495841	-0.525383	-0.151645	0.0620137	0.384998	0.142299	-0.0919794	0.386404	-0.153392	-0.261289	-0.273031	-0.435202	-0.287145	-0.216484	-0.407263	-0.351437	-0.0801422	-0.0342884	-0.143503	-0.222694
TAB3	brown	-0.309708	0.177208	0.464656	0.624019	0.621496	0.124181	0.301719	0.153592	0.479607	-0.087827	0.201072	0.4238	0.479816	-0.100845	0.613376	0.74372	0.53223	-0.154956	-0.338203	-0.147943	-0.664421	-0.469654	-0.481713	-0.0836523	0.318049	0.427363	0.062152	-0.0438377	0.437903	0.0752155	-0.270423	-0.323772	-0.373658	-0.246556	-0.0199799	-0.488106	-0.29846	-0.0562702	0.0680409	-0.0966973	-0.287608
BRAF	brown	-0.285971	0.315943	0.492317	0.515834	0.673554	0.240526	0.446079	0.0304754	0.459935	0.0239209	0.158791	0.202644	0.215424	0.154662	0.703046	0.746143	0.548295	-0.332026	-0.334004	-0.0506139	-0.649078	-0.477328	-0.398974	-0.196281	-0.0792004	0.0457451	-0.00202028	-0.102236	0.323029	-0.0934023	-0.181087	-0.164846	-0.297943	-0.25612	-0.408661	-0.230975	-0.398503	-0.0729745	-0.247189	-0.214093	0.0443203
CUL4B	brown	0.024096	-0.132992	0.124462	0.396153	0.308916	-0.0165216	0.0491101	-0.0977694	0.350776	-0.395635	-0.101891	0.168698	0.324101	0.0139473	0.491329	0.727665	0.715798	-0.171425	-0.25428	-0.104874	-0.451529	-0.342012	-0.262247	0.125147	0.0505653	0.397817	0.443166	-0.0241434	0.481822	0.0286334	-0.167482	-0.248015	-0.570326	-0.551904	-0.265558	-0.185268	-0.151607	-0.104434	-0.101588	-0.293349	-0.157786
CDC42SE2	brown	-0.203084	0.181577	0.249653	0.717898	0.693619	0.475565	0.529883	0.353052	0.751244	-0.201857	0.0212184	0.274371	0.100231	0.12489	0.519881	0.828445	0.492902	-0.309782	-0.1506	0.220977	-0.665029	-0.185804	-0.252558	-0.082426	0.18864	0.241144	0.253578	0.277795	0.603558	-0.281277	-0.164892	-0.317127	-0.560059	-0.367443	-0.42967	-0.532417	-0.680811	-0.421254	-0.342248	-0.217356	-0.335075
UBR1	brown	-0.39596	0.241694	0.540217	0.641177	0.674131	0.0774138	0.406591	-0.0192055	0.33662	0.122541	0.326988	0.306976	0.326243	0.0156334	0.713744	0.717066	0.454384	-0.434533	-0.511266	-0.19952	-0.651289	-0.540995	-0.486444	-0.226391	0.0130675	0.162627	-0.111453	-0.0800864	0.358966	-0.100047	-0.273192	-0.215012	-0.310507	-0.137662	-0.175399	-0.164449	-0.309107	0.0994131	-0.0158545	-0.122374	0.111645
TAOK1	brown	-0.24719	0.0792167	0.347437	0.460925	0.505133	0.184554	0.224028	0.18546	0.583079	-0.289533	0.0272826	0.298549	0.352177	0.0316547	0.559219	0.770102	0.711841	-0.0468457	-0.238908	-0.0675276	-0.643297	-0.446761	-0.420244	-0.0400656	0.368319	0.488042	0.265273	-0.0920058	0.434413	0.0616881	-0.268083	-0.380103	-0.305914	-0.442672	-0.269723	-0.33559	-0.286078	-0.227819	-0.21808	-0.242026	-0.217766
ZYG11B	brown	-0.240399	0.322229	0.514871	0.671788	0.792126	0.280374	0.473298	0.13812	0.584824	-0.0785432	0.0783532	0.245725	0.189619	0.0740201	0.646072	0.817221	0.571765	-0.349818	-0.330663	-0.0594359	-0.721234	-0.475977	-0.473915	-0.132068	0.0755135	0.188337	0.0300951	-0.0514939	0.388738	-0.183047	-0.13258	-0.205073	-0.485151	-0.232431	-0.29797	-0.428731	-0.485154	-0.205856	-0.154359	-0.170892	-0.266894
WDR26	brown	-0.132363	0.022951	0.288747	0.450161	0.432498	0.00186428	0.145195	-0.112462	0.307726	-0.275024	-0.00768405	0.131707	0.329519	0.0645435	0.527079	0.749035	0.681693	-0.0971508	-0.296381	-0.151924	-0.495727	-0.460505	-0.377712	0.0121582	0.181158	0.423547	0.274746	-0.103183	0.446596	0.0685033	-0.245309	-0.303016	-0.480063	-0.501549	-0.266616	-0.152068	-0.110858	-0.0154188	-0.0968693	-0.0842963	-0.00267528
PAQR3	brown	-0.164866	-0.0762803	0.311876	0.360353	0.34398	-0.0789592	0.0693897	-0.147327	0.291818	-0.241079	-0.06637	0.0339958	0.232614	0.2159	0.606535	0.718701	0.728351	-0.334307	-0.386065	-0.183953	-0.383822	-0.403766	-0.261827	-0.147797	-0.0167329	0.125897	0.189636	-0.143594	0.343377	-0.0306184	-0.161779	-0.0849298	-0.358026	-0.425486	-0.326072	0.0391438	-0.154068	0.110805	-0.0655197	-0.214021	0.197181
STT3B	brown	-0.018767	-0.306811	-0.00420439	0.315437	0.175645	0.0393741	0.0113302	0.0830058	0.45672	-0.477266	-0.182504	0.120476	0.209648	0.12174	0.418327	0.697334	0.658434	-0.261049	-0.247389	0.00072717	-0.354303	-0.130179	-0.0138775	0.0837523	0.0255512	0.244822	0.489837	0.189606	0.570588	-0.0273121	-0.0203921	-0.152141	-0.275292	-0.483118	-0.197244	-0.296795	-0.332171	0.00584228	-0.0957579	-0.406859	-0.00786817
PRKCI	brown	0.058261	-0.172085	0.165661	0.369958	0.329424	0.00897291	0.0855715	-0.0116782	0.413746	-0.290554	0.0338385	0.201858	0.341533	0.387327	0.644814	0.775705	0.743793	-0.2941	-0.362382	-0.109022	-0.511502	-0.402136	-0.192713	0.10695	0.171889	0.205579	0.435803	-0.0287345	0.495453	-0.090431	-0.182929	-0.203439	-0.373419	-0.576468	-0.406249	-0.209689	-0.333538	-0.111119	-0.220413	-0.23354	0.0464754
PPP4R2	brown	0.0973367	-0.265797	-0.142064	0.252922	0.146263	0.147594	0.0107618	0.0756007	0.496287	-0.602168	-0.383971	-0.0836392	-0.0371319	0.188478	0.278372	0.673101	0.686563	-0.060465	0.00272678	0.138686	-0.261224	-0.0503895	0.0665114	0.0560263	0.0987101	0.261505	0.610264	0.184908	0.53623	-0.168283	0.0817326	-0.123129	-0.496736	-0.607384	-0.476049	-0.166989	-0.333333	-0.155473	-0.309621	-0.31799	0.0223227
SMIM14	brown	-0.03872	-0.193798	0.0716247	0.376566	0.296659	0.138613	0.0609474	0.320998	0.609521	-0.373798	0.028452	0.468464	0.473699	0.209094	0.478105	0.702444	0.634936	-0.110754	-0.147977	0.0406798	-0.443535	-0.134172	-0.0641324	0.055669	0.461873	0.333887	0.531679	0.218389	0.597336	0.0823229	-0.254989	-0.381913	-0.391162	-0.49502	-0.0707452	-0.557388	-0.368368	-0.362757	-0.168105	-0.388732	-0.446843
KIAA1143	brown	-0.161402	-0.0577084	0.0769148	0.582589	0.448695	0.382377	0.328366	0.437668	0.717245	-0.388655	-0.084642	0.329177	0.221658	-0.0619886	0.382622	0.739188	0.525798	-0.0968424	-0.073181	0.221246	-0.624924	-0.101187	-0.194326	-0.0142413	0.412252	0.581156	0.37083	0.285748	0.647777	-0.155791	-0.241764	-0.425737	-0.19348	-0.431909	-0.243299	-0.631133	-0.580018	-0.352659	-0.211431	-0.253717	-0.404651
DNAJB14	brown	-0.296679	-0.0928724	0.289878	0.590586	0.516814	0.157148	0.232191	0.206848	0.654657	-0.322845	-0.0192484	0.289069	0.312257	0.0485526	0.677655	0.905034	0.76248	-0.357965	-0.378707	-0.0560774	-0.661974	-0.353735	-0.302874	-0.144488	0.22845	0.383953	0.30608	0.0781555	0.591816	-0.0702006	-0.120206	-0.217776	-0.271529	-0.386017	-0.247666	-0.452798	-0.484706	-0.0728123	-0.0974329	-0.292982	-0.137586
NAA15	brown	0.0997957	-0.232728	0.00930961	0.416437	0.2545	0.0654603	0.112016	0.0419049	0.402625	-0.511525	-0.230055	0.0735956	0.19072	0.0474522	0.375621	0.684738	0.592259	-0.181059	-0.235862	0.0132681	-0.401311	-0.191109	-0.106948	0.0750444	0.106193	0.377469	0.406135	0.168439	0.581994	-0.0316823	-0.142953	-0.25152	-0.352336	-0.602449	-0.308322	-0.244643	-0.333495	-0.0608525	-0.219185	-0.29234	0.0914481
OTUD4	brown	-0.285426	0.156762	0.333464	0.407698	0.523078	0.183594	0.234219	0.00345792	0.486178	-0.295288	-0.147088	-0.0165469	-0.011738	-0.0146251	0.464108	0.739359	0.652076	-0.188104	-0.219334	-0.0710931	-0.547319	-0.421032	-0.355872	-0.120975	0.0186888	0.205775	0.183695	-0.10291	0.345106	-0.139522	0.0991876	-0.0617766	-0.411368	-0.30031	-0.402417	-0.239781	-0.369695	-0.0183922	-0.179844	-0.205804	0.0424804
LMBRD2	brown	-0.0789448	-0.430492	-0.18587	0.289589	0.0441378	0.0813847	-0.0339658	0.155125	0.430157	-0.665368	-0.339722	0.147979	0.272762	-0.124204	0.251202	0.649574	0.672442	-0.0883926	-0.0516397	0.151616	-0.268906	0.0107478	-0.00476806	0.0257622	0.244524	0.599631	0.576498	0.204802	0.604589	0.174915	-0.160376	-0.379163	-0.256674	-0.63668	-0.190279	-0.295269	-0.221269	-0.117426	-0.173914	-0.394049	-0.155266
SLC25A46	brown	-0.231349	0.114886	0.411533	0.775797	0.695476	0.326733	0.472963	0.381099	0.753812	-0.0767493	0.248154	0.535779	0.436954	0.0858533	0.764049	0.88142	0.589552	-0.421822	-0.429878	0.00637979	-0.804974	-0.421781	-0.504448	-0.149413	0.146975	0.345679	0.15981	0.119347	0.597774	-0.0704641	-0.373822	-0.429698	-0.464594	-0.330682	-0.238868	-0.541759	-0.56735	-0.25486	-0.175328	-0.346783	-0.32727
RICTOR	brown	0.0668336	-0.258905	-0.0509348	0.423414	0.252699	0.305674	0.174779	0.345245	0.704536	-0.497111	-0.112121	0.358274	0.346567	0.148286	0.51472	0.779509	0.724409	-0.14581	-0.0895486	0.216678	-0.525701	-0.122516	-0.179455	0.0607309	0.115931	0.474982	0.608557	0.221226	0.669773	0.0127808	-0.287085	-0.447263	-0.378517	-0.677492	-0.412157	-0.418466	-0.420675	-0.362212	-0.373745	-0.524617	-0.301248
UBLCP1	brown	-0.295834	0.0141445	0.159386	0.79022	0.555842	0.344334	0.487205	0.384544	0.60848	-0.205869	0.115519	0.467368	0.369841	-0.217141	0.449319	0.739349	0.359287	-0.2903	-0.24708	0.164147	-0.660764	-0.172106	-0.355288	-0.110088	0.269409	0.562956	0.163821	0.342543	0.7104	-0.186236	-0.410583	-0.497155	-0.251391	-0.317313	-0.0899926	-0.534607	-0.502018	-0.180574	-0.0927505	-0.242281	-0.309982
RAD21	brown	-0.0346818	-0.191096	0.0592575	0.263446	0.249393	-0.0144626	-0.0467467	0.014456	0.444649	-0.442249	-0.239118	-0.0436663	-0.0068673	0.212837	0.330994	0.631771	0.667757	-0.170935	-0.212201	-0.125219	-0.322931	-0.209564	0.0323346	0.0722317	0.470035	0.203916	0.449512	0.0441625	0.396405	-0.153208	0.19784	0.0539985	-0.298402	-0.380074	-0.227571	-0.240743	-0.268262	-0.113558	-0.109191	-0.18007	-0.116313
SLC25A32	brown	-0.27312	-0.0332201	0.188202	0.597848	0.473738	0.292795	0.352771	0.318024	0.599465	-0.288647	0.0148428	0.342404	0.335798	-0.0874484	0.504443	0.782167	0.524144	-0.196246	-0.204529	0.128704	-0.605017	-0.219038	-0.303555	-0.127234	0.249638	0.45857	0.232062	0.21485	0.652786	-0.0536613	-0.269062	-0.37402	-0.132058	-0.395431	-0.195561	-0.510101	-0.488081	-0.10726	-0.177869	-0.281721	-0.122736
KBTBD6	brown	0.117448	-0.3343	-0.0997711	0.286656	0.139025	0.16805	0.00978278	0.264469	0.601793	-0.56025	-0.21659	0.254515	0.276118	0.180741	0.392092	0.653631	0.708868	-0.153657	-0.0721426	0.141058	-0.382242	-0.0541697	0.0188554	0.228052	0.26484	0.326724	0.650097	0.191508	0.547522	0.107285	-0.0525062	-0.287586	-0.420935	-0.581389	-0.30219	-0.430432	-0.407419	-0.39797	-0.280383	-0.46254	-0.376887
SLC18A2	brown	0.0151067	-0.0244327	0.0110033	0.607843	0.477715	0.335652	0.383922	0.27862	0.569197	-0.320629	-0.0632576	0.220971	0.122619	0.05166	0.389416	0.716854	0.42926	-0.17844	-0.106651	0.184385	-0.48846	-0.137209	-0.168279	-0.0471333	0.188554	0.331211	0.342248	0.294049	0.628327	-0.181765	-0.193134	-0.362442	-0.416534	-0.43808	-0.33944	-0.408429	-0.506009	-0.327225	-0.301977	-0.225846	-0.221512
TRUB1	brown	-0.365078	0.130287	0.488699	0.503123	0.591388	0.0463205	0.197204	0.0418701	0.478588	-0.194829	0.0234778	0.221984	0.305148	0.059217	0.632037	0.777165	0.656783	-0.223704	-0.343685	-0.196673	-0.567826	-0.430741	-0.398356	-0.272909	0.133096	0.198654	0.0806328	-0.0540521	0.394303	-0.0216787	-0.106966	-0.131344	-0.314077	-0.157587	-0.0661807	-0.406749	-0.335704	0.0302577	0.113095	-0.104379	-0.175175
RAB8B	brown	-0.177602	-0.210899	-0.00284304	0.388813	0.229144	0.0540332	0.0648395	-0.0497266	0.329176	-0.656675	-0.437737	-0.153599	0.0150461	-0.17219	0.217609	0.706825	0.625635	-0.00249531	-0.085182	0.0476113	-0.293813	-0.109267	-0.0708187	-0.0781732	0.124398	0.575027	0.366229	0.149668	0.578831	-0.00377715	-0.0241544	-0.261905	-0.308661	-0.607091	-0.332555	-0.160805	-0.20297	0.0846867	-0.0981456	-0.122645	0.135606
BAG5	brown	-0.00956153	0.0673825	0.184067	0.520474	0.48251	0.331111	0.29812	0.355469	0.669607	-0.276323	-0.00602426	0.278118	0.213043	0.0888908	0.427354	0.715585	0.508316	-0.0226624	-0.072173	0.0999087	-0.606827	-0.268308	-0.306039	-0.0708456	0.27394	0.416805	0.310772	0.11587	0.515786	-0.258363	-0.0988044	-0.256627	-0.448417	-0.366608	-0.191097	-0.550674	-0.522689	-0.163556	-0.0761063	-0.136667	-0.259708
API5	brown	-0.113805	-0.0984809	0.187342	0.64782	0.497617	0.202283	0.294447	0.23259	0.644046	-0.229902	0.128491	0.358801	0.359451	0.265964	0.656722	0.86031	0.629203	-0.392825	-0.38023	0.0405176	-0.669073	-0.290998	-0.235437	0.0373475	0.124969	0.337067	0.417361	0.245137	0.702132	-0.243671	-0.29121	-0.355144	-0.514234	-0.555815	-0.439812	-0.383889	-0.549441	-0.241306	-0.231176	-0.28498	-0.129273
COPS2	brown	-0.0726109	-0.146824	-0.0643329	0.600536	0.416194	0.332902	0.327272	0.219685	0.624743	-0.525422	-0.311649	-0.0189639	-0.112017	0.134124	0.290963	0.773187	0.486431	-0.315639	-0.140728	0.250897	-0.461365	0.0174312	0.0213474	0.0252495	0.0515574	0.332929	0.437151	0.465543	0.747037	-0.410908	-0.0576698	-0.256165	-0.432932	-0.55418	-0.520844	-0.372637	-0.6292	-0.201205	-0.30443	-0.193494	-0.0217343
TMX3	brown	-0.0877068	-0.0931984	0.331308	0.468899	0.438085	-0.0847792	0.0968601	-0.0396004	0.403273	-0.055963	0.28791	0.395722	0.516825	0.280247	0.777786	0.789816	0.702969	-0.4256	-0.534674	-0.272259	-0.575312	-0.496732	-0.302401	0.0637058	0.187341	0.102382	0.31425	-0.0358153	0.47157	-0.0320788	-0.174801	-0.0707239	-0.388245	-0.342526	-0.135198	-0.319614	-0.30792	-0.0133153	-0.00892676	-0.257184	-0.0880965
NUDT21	brown	-0.26553	-0.00930254	0.492133	0.514432	0.500593	-0.151441	0.0948586	-0.0529292	0.333869	-0.0945608	0.245634	0.364692	0.534683	0.140497	0.742485	0.747567	0.675185	-0.353422	-0.579445	-0.369477	-0.573285	-0.566048	-0.426754	-0.0291452	0.24717	0.234093	0.133785	-0.135283	0.394595	0.0939725	-0.195553	-0.238717	-0.364221	-0.230049	0.000182432	-0.275641	-0.169422	0.0736742	0.171779	-0.153664	-0.124958
HOOK3	brown	-0.316438	0.12528	0.441621	0.364702	0.482591	0.137084	0.173098	0.14823	0.548847	-0.0595158	0.234759	0.4248	0.446542	0.0795412	0.722059	0.743622	0.709934	-0.187921	-0.283116	-0.130071	-0.581288	-0.48222	-0.462028	-0.205065	0.144235	0.115885	0.195013	-0.161534	0.331516	0.096733	-0.205737	-0.20912	-0.28992	-0.220896	-0.196132	-0.307304	-0.27185	-0.147484	-0.166557	-0.395315	-0.184736
LMBRD1	brown	-0.0231698	-0.292418	-0.120732	0.375109	0.175651	0.178433	0.105931	0.16277	0.516296	-0.547427	-0.320839	0.021697	0.0377922	0.134478	0.29344	0.680827	0.593817	-0.248756	-0.13952	0.170796	-0.317983	0.028444	0.106198	0.103123	0.138089	0.353599	0.501348	0.309355	0.625774	-0.134666	-0.106912	-0.270328	-0.314532	-0.661483	-0.372322	-0.271908	-0.381511	-0.143515	-0.228522	-0.415694	-0.101862
BMI1	brown	-0.0290786	0.0201387	0.165357	0.362894	0.409395	0.202199	0.136892	0.171708	0.584837	-0.411415	-0.284579	-0.0455093	-0.0929794	0.0961341	0.317606	0.669949	0.585566	-0.0345871	-0.0478422	0.0084358	-0.443365	-0.197365	-0.0727642	-0.0480106	0.332792	0.228789	0.301013	0.0704984	0.390281	-0.234606	0.198143	0.0527925	-0.352841	-0.340699	-0.283212	-0.437393	-0.495799	-0.193063	-0.20438	-0.146042	-0.162086
CDC40	brown	-0.0978201	0.116686	0.340094	0.65582	0.620709	0.296371	0.401526	0.247124	0.613159	-0.133329	0.154253	0.408596	0.407738	0.257602	0.688529	0.838221	0.589059	-0.309502	-0.298259	0.0604605	-0.677083	-0.362321	-0.435947	-0.133468	0.0338499	0.345346	0.246315	0.101753	0.575884	-0.0999437	-0.441963	-0.487713	-0.588684	-0.520572	-0.33763	-0.443605	-0.446101	-0.267689	-0.199025	-0.243447	-0.289058
CEP120	brown	-0.080125	-0.0387167	0.388704	0.51197	0.482652	-0.0807483	0.0995718	0.0552785	0.445974	-0.0838443	0.208676	0.361087	0.429734	0.193283	0.672812	0.690889	0.625654	-0.316531	-0.501632	-0.313541	-0.639176	-0.509314	-0.357772	-0.00478603	0.370818	0.282626	0.199319	-0.0781418	0.387269	-0.0793572	-0.0908494	-0.094205	-0.302528	-0.216253	-0.0483391	-0.42406	-0.335072	-0.0413579	0.140937	-0.0859749	-0.236379
FEM1B	brown	-0.25896	0.14611	0.294176	0.753902	0.700265	0.29697	0.482642	0.115371	0.597503	-0.232021	-0.0418055	0.0855847	0.01785	0.0320748	0.555787	0.874527	0.551306	-0.412593	-0.362816	0.0251153	-0.699431	-0.375346	-0.32218	-0.0559152	0.0379877	0.320375	0.169472	0.129772	0.573042	-0.349684	-0.0861948	-0.231274	-0.520048	-0.385947	-0.497831	-0.301427	-0.564063	-0.0756728	-0.193141	-0.144216	0.0115962
PWWP2A	brown	0.115079	-0.207892	0.0442069	0.318172	0.254039	0.267118	0.0940608	0.455171	0.730209	-0.278501	0.087544	0.561938	0.48489	0.307189	0.548222	0.673876	0.663193	-0.192818	-0.0951569	0.144505	-0.469648	-0.0980058	-0.0913142	0.0593391	0.425336	0.195213	0.574745	0.186951	0.53012	0.0987188	-0.213814	-0.28415	-0.335552	-0.449346	-0.115344	-0.658378	-0.486981	-0.516014	-0.279697	-0.550546	-0.583049
DNAJC18	brown	-0.110017	0.221243	0.367156	0.587246	0.654525	0.387306	0.469933	0.294619	0.669003	-0.100468	0.124465	0.367284	0.248348	0.182463	0.586788	0.728529	0.52013	-0.375618	-0.274499	0.0744417	-0.657962	-0.357021	-0.397842	-0.059537	0.0954456	0.106172	0.150695	0.0250436	0.38893	-0.039611	-0.206099	-0.273112	-0.503439	-0.286785	-0.338977	-0.491787	-0.551091	-0.377131	-0.285596	-0.3784	-0.392073
FAM98B	brown	0.0788236	-0.25748	-0.00175136	0.343407	0.247661	0.0514471	0.0538479	0.0335622	0.426612	-0.479642	-0.264194	0.0433177	0.115437	0.176498	0.382155	0.698403	0.642163	-0.266592	-0.155712	0.0389713	-0.297062	-0.095911	0.0838918	0.051817	0.217439	0.129139	0.473868	0.171663	0.507498	-0.106849	0.0759615	0.016313	-0.431059	-0.512371	-0.251525	-0.315587	-0.453651	-0.141793	-0.170567	-0.277549	-0.0281603
EIF1AX	brown	-0.196278	-0.122832	0.0884169	0.464696	0.366707	0.221477	0.201367	0.183141	0.546333	-0.412561	-0.136813	0.193034	0.245432	0.0937161	0.461985	0.788271	0.664072	-0.152402	-0.0511485	0.169814	-0.414024	-0.105052	-0.0865604	-0.126685	0.261978	0.320999	0.412538	0.19385	0.592153	-0.0914136	-0.118637	-0.244837	-0.392989	-0.501416	-0.327116	-0.33486	-0.427153	-0.17562	-0.231529	-0.265206	-0.0902438
TOMM20	brown	-0.154477	-0.0207673	0.12929	0.664301	0.536062	0.307078	0.43497	0.297086	0.587853	-0.123796	0.139979	0.297668	0.195983	0.346434	0.537292	0.715133	0.379756	-0.450677	-0.310582	0.155695	-0.620817	-0.137455	-0.0395098	0.0141856	0.203086	0.212677	0.274717	0.365413	0.641462	-0.327028	-0.208307	-0.306442	-0.316218	-0.395199	-0.393666	-0.468839	-0.696235	-0.212542	-0.223033	-0.119361	-0.071611
AGFG1	brown	-0.135968	-0.138152	0.329469	0.421062	0.37471	-0.0406806	0.0349722	0.0971987	0.504598	-0.283001	0.0392505	0.281513	0.422495	0.200837	0.688573	0.781475	0.739026	-0.258744	-0.443421	-0.238546	-0.536239	-0.425138	-0.259271	-0.0381037	0.0651141	0.281598	0.294868	-0.0262358	0.477501	0.162574	-0.099525	-0.180095	-0.39034	-0.439279	-0.0799083	-0.392826	-0.308159	0.0721858	0.11158	-0.318772	-0.105221
LEMD3	brown	0.0207701	-0.234754	0.0940461	0.371087	0.289374	0.0476686	0.0462631	0.0386573	0.476067	-0.520883	-0.222336	0.178726	0.328904	0.164854	0.530537	0.794101	0.808842	-0.2862	-0.225742	-0.00593872	-0.391805	-0.212294	-0.0974777	0.0650256	0.129824	0.256211	0.493562	0.069282	0.533267	0.126582	-0.115293	-0.26666	-0.491292	-0.539845	-0.201056	-0.326206	-0.319386	-0.190304	-0.160288	-0.389533	-0.210179
RALGAPA1	brown	-0.327943	0.294529	0.502952	0.509433	0.669583	0.336661	0.401666	0.297089	0.653757	-0.0353449	0.138803	0.391409	0.238652	-0.0751811	0.621746	0.701376	0.536732	-0.281262	-0.256423	-0.0297301	-0.700882	-0.433909	-0.514898	-0.312118	0.0414599	0.144879	-0.00895687	-0.110465	0.27556	0.0488304	-0.0957143	-0.152297	-0.251163	-0.0426022	-0.171189	-0.547724	-0.501574	-0.133325	-0.0907418	-0.373041	-0.290046
AKIRIN1	brown	-0.342473	0.303931	0.30463	0.64215	0.632757	0.544261	0.5888	0.437851	0.680622	-0.113524	0.0915979	0.314204	0.170352	-0.0916554	0.427609	0.679438	0.344198	-0.102842	-0.0349894	0.286963	-0.625095	-0.185592	-0.436737	-0.346458	0.0398102	0.391534	0.0240318	0.211948	0.532808	-0.202122	-0.382335	-0.514781	-0.341935	-0.314363	-0.36086	-0.382392	-0.493702	-0.25619	-0.319107	-0.294608	-0.181489
PDE12	brown	-0.151754	-0.0494626	0.245854	0.464119	0.387144	0.171595	0.169814	0.186327	0.573655	-0.394505	-0.0568282	0.254844	0.39326	0.0303046	0.552768	0.810046	0.736875	-0.0559609	-0.184192	0.0099547	-0.574978	-0.356519	-0.407876	-0.0981057	0.0852348	0.504553	0.362039	0.0121038	0.558681	0.0253819	-0.264116	-0.403004	-0.490626	-0.551868	-0.299056	-0.30846	-0.286167	-0.0602699	-0.147942	-0.328367	-0.0845912
VCPIP1	brown	-0.120863	-0.253619	-0.0383979	0.389666	0.229743	0.148867	0.0995315	0.106694	0.480556	-0.607901	-0.297867	0.101016	0.224725	-0.0618158	0.365758	0.76704	0.726941	-0.0564681	-0.0452959	0.159018	-0.379028	-0.073807	-0.0663358	-0.0172567	0.239707	0.545923	0.542092	0.207434	0.650713	0.0209476	-0.145071	-0.368491	-0.345624	-0.669087	-0.373533	-0.256971	-0.277862	-0.143755	-0.242861	-0.292555	-0.0732353
RAB6A	brown	-0.267992	0.0571669	0.118401	0.752293	0.5838	0.384899	0.506632	0.225882	0.55981	-0.334832	-0.0189639	0.245637	0.191633	-0.0280102	0.417664	0.828219	0.443669	-0.177101	-0.108663	0.26185	-0.591512	-0.111687	-0.232462	-0.177926	0.17809	0.505043	0.282297	0.404825	0.786283	-0.260443	-0.369009	-0.540174	-0.418777	-0.556479	-0.429991	-0.392802	-0.517507	-0.214539	-0.290351	-0.198387	-0.0981602
LYSMD3	brown	-0.159816	-0.168479	0.0783483	0.334676	0.250587	0.0332054	0.0102527	-0.00263994	0.412371	-0.625876	-0.401549	-0.0643913	0.0861814	-0.083046	0.307137	0.719527	0.712659	-0.00563288	-0.108942	-0.0257859	-0.376423	-0.213603	-0.170216	-0.0886713	0.0649894	0.509612	0.38595	0.0592232	0.524603	-0.0427387	-0.013389	-0.241566	-0.369311	-0.527314	-0.244232	-0.222541	-0.218038	0.0628313	-0.0563084	-0.229185	0.0346562
MBLAC2	brown	-0.0388351	-0.191543	0.0842748	0.529349	0.385774	0.232558	0.195905	0.300213	0.693471	-0.484308	-0.102938	0.351353	0.373735	0.174591	0.541655	0.8496	0.747941	-0.237952	-0.209839	0.117137	-0.566178	-0.17874	-0.159815	0.0422022	0.301402	0.427971	0.539836	0.231524	0.695238	0.0426211	-0.277371	-0.437997	-0.469563	-0.597177	-0.307841	-0.508407	-0.498411	-0.360155	-0.274036	-0.377035	-0.346926
FAM91A1	brown	-0.21489	-0.0929055	0.218069	0.437662	0.397239	0.0840335	0.126635	0.0398306	0.509891	-0.465424	-0.230877	0.0455978	0.148591	0.000921207	0.502324	0.83302	0.771381	-0.141185	-0.214082	-0.0553187	-0.489487	-0.310836	-0.234867	-0.190319	0.18408	0.372489	0.31236	0.0118883	0.510894	-0.0910938	-0.0351593	-0.143872	-0.283014	-0.425862	-0.272428	-0.263044	-0.348638	0.0455346	-0.0905712	-0.203676	0.0432106
C2orf69	brown	0.0138374	-0.264977	0.062242	0.3177	0.195141	-0.103555	-0.0475019	-0.110861	0.307474	-0.453148	-0.149099	0.0773225	0.308322	0.181684	0.474818	0.736181	0.749902	-0.16821	-0.285361	-0.108378	-0.330705	-0.252501	-0.113532	-0.0045942	0.0864462	0.30003	0.512733	0.0711847	0.566984	-0.0349661	-0.182867	-0.24143	-0.423485	-0.610959	-0.280884	-0.08376	-0.122756	0.0204142	-0.122855	-0.280342	0.0941972
EPM2AIP1	brown	-0.131448	0.111339	0.2724	0.619823	0.57708	0.263733	0.450327	0.0990582	0.489316	0.051096	0.254664	0.3242	0.205289	0.174131	0.620071	0.68912	0.396063	-0.635343	-0.436419	0.0420996	-0.618451	-0.297453	-0.29997	0.0848339	-0.110789	-0.0516863	0.154497	0.17345	0.486105	-0.252563	-0.164255	-0.117013	-0.368484	-0.193406	-0.381451	-0.334228	-0.530639	-0.196212	-0.248029	-0.283666	-0.105763
SOCS4	brown	0.0631379	-0.344928	-0.042193	0.275577	0.12914	-0.0822015	-0.0983247	-0.0623057	0.32606	-0.508723	-0.219336	0.00326829	0.151155	0.0943044	0.350449	0.651406	0.706169	-0.1052	-0.215743	-0.107992	-0.325682	-0.268171	-0.111105	0.129663	0.281362	0.387823	0.533967	0.0159158	0.480349	-0.0742094	0.0609345	-0.0555526	-0.323159	-0.515275	-0.279097	-0.120039	-0.186884	-0.00523977	-0.107976	-0.161627	0.0974326
TRAPPC6B	brown	-0.151978	0.0327276	0.168147	0.648247	0.51085	0.304827	0.392624	0.330423	0.598463	-0.103993	0.219499	0.40397	0.312863	0.24101	0.539458	0.69758	0.372993	-0.152247	-0.189524	0.153715	-0.630546	-0.155332	-0.249958	-0.174204	0.0745497	0.417965	0.279121	0.356236	0.670088	-0.327381	-0.452607	-0.48582	-0.373219	-0.471099	-0.414253	-0.417999	-0.530801	-0.281683	-0.194039	-0.108225	-0.213737
ZNF721	brown	0.0305838	-0.0707968	0.205881	0.373665	0.384337	0.12381	0.115727	0.128143	0.553387	-0.15683	0.220372	0.454872	0.491519	0.28079	0.685204	0.750503	0.710704	-0.209203	-0.280704	-0.0547616	-0.605016	-0.364185	-0.340534	0.11714	0.123408	0.243342	0.489583	0.040419	0.518261	-0.0358189	-0.26394	-0.264122	-0.442629	-0.515451	-0.303786	-0.422332	-0.324763	-0.383615	-0.245896	-0.384557	-0.396891
TBK1	brown	-0.146568	-0.0909422	0.0429852	0.688723	0.485689	0.370178	0.397536	0.331106	0.673268	-0.436383	-0.148222	0.220661	0.0973997	-0.0778863	0.403712	0.805604	0.522591	-0.300477	-0.173258	0.215212	-0.559047	-0.111706	-0.187012	-0.033808	0.178975	0.437341	0.342137	0.348441	0.719378	-0.162054	-0.152324	-0.38215	-0.415937	-0.465236	-0.343873	-0.462829	-0.575724	-0.175921	-0.242419	-0.323411	-0.152146
RBM11	brown	-0.0830438	-0.184977	0.0503912	0.636757	0.367048	0.180856	0.265446	0.213008	0.518347	-0.416686	-0.0815798	0.226132	0.270877	0.0846785	0.457928	0.747632	0.526696	-0.213433	-0.25484	0.0999984	-0.53778	-0.177587	-0.21149	0.0205887	0.17528	0.587517	0.347029	0.26975	0.695153	-0.132592	-0.392404	-0.515579	-0.39441	-0.628271	-0.388549	-0.266436	-0.389342	-0.165982	-0.183196	-0.159147	-0.0984757
BRWD1	brown	-0.334531	0.0743785	0.414982	0.543662	0.533733	0.0478326	0.271631	0.0776269	0.381922	0.128362	0.463172	0.500411	0.531238	0.263214	0.732862	0.666812	0.471956	-0.410217	-0.49451	-0.162226	-0.605607	-0.420782	-0.394219	-0.0824917	0.197887	0.170743	0.114408	0.0379616	0.448063	-0.0731454	-0.414713	-0.334286	-0.237713	-0.262014	-0.177583	-0.260343	-0.242864	-0.133516	-0.0795672	-0.223507	-0.172036
C16orf52	brown	-0.255342	-0.0327103	0.227928	0.477152	0.465035	0.188283	0.248462	0.153755	0.578758	-0.295505	-0.0910933	0.0930512	0.0592954	0.129483	0.521541	0.770367	0.621622	-0.285472	-0.28503	-0.0160628	-0.559412	-0.297472	-0.256763	-0.206678	0.090903	0.226722	0.248411	0.0998738	0.502581	-0.282821	0.0261629	-0.0279178	-0.194854	-0.359313	-0.368787	-0.337107	-0.476824	0.0200936	-0.137072	-0.290051	0.0263908
ANKRD46	brown	-0.301085	0.0688033	0.262039	0.771231	0.686567	0.292598	0.455766	0.20601	0.644387	-0.241814	-0.0332017	0.183336	0.0648536	0.0699003	0.548808	0.879099	0.545232	-0.430504	-0.342704	0.0599642	-0.661737	-0.27509	-0.281726	-0.182104	0.160376	0.31361	0.197097	0.232229	0.632597	-0.348346	-0.14818	-0.216439	-0.426829	-0.349884	-0.378961	-0.41905	-0.608728	-0.184487	-0.178631	-0.12106	-0.150754
ZDHHC17	brown	-0.168034	0.0402344	0.355046	0.583583	0.573628	0.149003	0.283359	0.149353	0.593902	-0.0730933	0.233368	0.44776	0.406945	0.056551	0.729255	0.834081	0.679202	-0.374899	-0.407698	-0.122615	-0.682617	-0.468207	-0.425509	-0.0564092	0.265278	0.20098	0.261398	-0.00858542	0.481922	-0.0729447	-0.156155	-0.10664	-0.373793	-0.271537	-0.201703	-0.419166	-0.423493	-0.20272	-0.159911	-0.35652	-0.265028
USP7	brown	-0.0865679	0.287152	0.226606	0.574818	0.61932	0.37991	0.494884	0.167973	0.50115	-0.179093	0.0153341	0.162786	0.12685	0.105492	0.393749	0.688714	0.415169	-0.0540625	-0.0701419	0.164445	-0.572701	-0.272465	-0.247034	-0.0289731	0.229648	0.282287	0.201466	0.133965	0.489381	-0.213697	-0.242738	-0.38846	-0.475631	-0.429073	-0.450038	-0.342815	-0.471719	-0.329392	-0.389304	-0.0538639	-0.135365
CHM	brown	-0.291367	0.115351	0.418743	0.542669	0.61536	0.240722	0.303912	0.246191	0.671809	-0.18901	0.0510373	0.345618	0.294469	0.0792372	0.667934	0.823446	0.670602	-0.296574	-0.315611	-0.0504516	-0.682569	-0.384315	-0.405834	-0.19976	0.164156	0.253919	0.154946	0.00275169	0.454923	-0.0453604	-0.183875	-0.211691	-0.296777	-0.282648	-0.150783	-0.547101	-0.484069	-0.160746	-0.0760381	-0.310524	-0.321258
VKORC1L1	brown	-0.288492	0.331105	0.351967	0.671261	0.716997	0.522331	0.577159	0.400198	0.724265	-0.181858	-0.0815131	0.165325	0.00532156	-0.102259	0.412388	0.745089	0.409384	-0.170457	-0.0880643	0.211795	-0.657982	-0.228858	-0.334499	-0.177227	0.165251	0.330899	0.0336751	0.15835	0.468921	-0.226467	-0.104753	-0.274738	-0.365701	-0.268091	-0.339568	-0.518758	-0.636119	-0.262431	-0.241516	-0.14766	-0.245082
CD47	brown	-0.304507	0.21032	0.29528	0.73974	0.66465	0.513105	0.615969	0.400511	0.720805	-0.0730966	0.170572	0.432801	0.26852	-0.00924931	0.590836	0.788012	0.418672	-0.383325	-0.218586	0.255804	-0.712227	-0.238148	-0.40933	-0.208723	-0.0304797	0.270072	0.0970441	0.217876	0.578934	-0.15893	-0.435041	-0.471241	-0.409922	-0.347645	-0.457334	-0.406851	-0.624443	-0.301799	-0.391453	-0.37247	-0.170496
STRN3	brown	-0.12753	-0.152274	0.0896184	0.314967	0.232214	0.0262962	0.0364581	0.000648153	0.359627	-0.512364	-0.241702	0.079921	0.238777	-0.104904	0.3241	0.681282	0.675775	-0.0119778	-0.122495	-0.0387571	-0.34548	-0.231656	-0.178722	-0.0752515	0.314797	0.431284	0.359105	0.0123484	0.475815	0.0997109	-0.143454	-0.259175	-0.272504	-0.479401	-0.132342	-0.233228	-0.158987	-0.0268788	-0.130575	-0.295256	-0.0649765
DDI2	brown	-0.109736	0.152242	0.315277	0.681653	0.650239	0.305137	0.46925	0.253584	0.591686	0.0588295	0.333962	0.511637	0.362862	0.245334	0.714536	0.746485	0.439344	-0.505043	-0.41805	0.0267419	-0.710995	-0.399215	-0.411416	-0.0344772	-0.0285512	0.142119	0.161971	0.103832	0.498812	-0.190017	-0.424923	-0.401252	-0.524634	-0.324373	-0.382137	-0.383114	-0.531473	-0.304112	-0.258962	-0.278736	-0.230673
PELI1	brown	-0.00239877	-0.336458	-0.108361	0.392112	0.103915	-0.0109324	0.0408501	-0.0519677	0.239485	-0.569217	-0.270417	-0.023476	0.197157	0.0768882	0.264663	0.636126	0.536366	-0.0926631	-0.158321	0.0757071	-0.24237	-0.0333455	0.0535359	0.0437571	0.0790514	0.507452	0.459873	0.297765	0.682232	0.0673292	-0.226469	-0.409774	-0.367626	-0.705318	-0.307196	-0.107427	-0.175745	0.0842198	-0.143541	-0.160631	0.226323
VPS13A	brown	-0.205595	-0.0222018	0.345128	0.544868	0.497273	-0.0680293	0.151921	-0.0566998	0.330502	-0.235711	-0.0125697	0.133384	0.232906	-0.0452857	0.538728	0.743142	0.621168	-0.357267	-0.508109	-0.280164	-0.553205	-0.503353	-0.388388	-0.0788657	0.195585	0.40348	0.135827	-0.124443	0.393068	-0.0183363	-0.0849903	-0.163557	-0.346234	-0.302007	-0.131262	-0.225668	-0.214155	0.105802	0.074036	-0.0417815	-0.0213572
GFPT1	brown	-0.35372	0.193079	0.432331	0.582831	0.648704	0.0596474	0.317676	-0.1007	0.334802	-0.132362	-0.0503492	0.0129007	0.0161926	-0.0540936	0.501263	0.719299	0.498532	-0.393462	-0.405667	-0.192379	-0.489121	-0.429216	-0.293035	-0.206703	0.138197	0.0740891	-0.0433666	-0.0635253	0.314156	-0.102905	0.0733134	0.0514762	-0.359478	-0.110104	-0.183959	-0.237759	-0.377052	0.0784635	0.0110044	0.0182236	0.0712587
FAM115A	brown	-0.050604	-0.0124178	0.224632	0.651582	0.533159	0.114552	0.342574	0.0794324	0.451975	-0.0507388	0.20541	0.31761	0.330665	0.433848	0.6501	0.732621	0.487233	-0.545186	-0.537381	-0.0690287	-0.613421	-0.372152	-0.274435	0.103069	0.0633179	0.187664	0.25572	0.14743	0.557653	-0.234054	-0.436376	-0.335033	-0.471087	-0.50298	-0.435682	-0.233572	-0.395177	-0.226172	-0.208702	-0.130409	-0.139628
TTC37	brown	-0.25775	0.277395	0.646657	0.649955	0.746985	0.107746	0.365733	0.121726	0.53853	0.0885805	0.277071	0.336769	0.290648	0.146254	0.750202	0.736922	0.524558	-0.429398	-0.594058	-0.311359	-0.763547	-0.642887	-0.592416	-0.161786	0.156767	0.195974	-0.116039	-0.17058	0.289683	-0.127905	-0.202795	-0.1409	-0.321348	-0.0969671	-0.115483	-0.374329	-0.36207	-0.0342338	0.070207	-0.113693	-0.219885
SLC9A6	brown	-0.101576	-0.139598	-0.00345489	0.757144	0.436369	0.241788	0.40986	0.167371	0.460935	-0.288641	0.0133344	0.235569	0.225508	0.0893978	0.420422	0.752642	0.422804	-0.490922	-0.379663	0.172337	-0.553236	-0.159025	-0.199331	0.0660196	0.0663382	0.500037	0.346167	0.337998	0.741448	-0.252665	-0.442729	-0.564219	-0.542861	-0.621462	-0.526639	-0.201678	-0.434174	-0.162608	-0.250835	-0.13018	-0.0206794
FAM179B	brown	-0.184459	0.231002	0.459171	0.473954	0.653445	0.294441	0.317291	0.27065	0.724433	-0.0834618	0.100943	0.309564	0.196332	0.265749	0.665587	0.776282	0.629802	-0.282584	-0.293254	-0.0620844	-0.707955	-0.425327	-0.392947	-0.136643	0.1462	0.124179	0.161683	-0.0452628	0.361836	-0.169833	-0.110101	-0.116358	-0.375208	-0.282445	-0.277856	-0.572918	-0.546473	-0.277652	-0.176021	-0.350575	-0.380895
FOXJ3	brown	-0.185581	0.279387	0.312678	0.636329	0.635241	0.303816	0.491817	0.0787068	0.441756	-0.0909371	0.0910905	0.12939	0.124489	0.178345	0.521549	0.729866	0.405537	-0.182745	-0.246845	0.0789866	-0.636745	-0.361488	-0.367304	-0.115342	-0.1484	0.339798	0.09576	0.105363	0.517725	-0.314574	-0.424609	-0.490654	-0.534702	-0.504267	-0.599428	-0.141241	-0.406502	-0.134546	-0.306577	-0.0388881	0.0917222
UBE2J1	brown	0.00607707	-0.179064	0.0837215	0.321751	0.227409	-0.0687032	-0.0394558	-0.0536937	0.325702	-0.495997	-0.243034	-0.0763406	0.0986841	0.185824	0.305694	0.641342	0.581774	-0.00868872	-0.180239	-0.112613	-0.312228	-0.220415	-0.0710534	-0.0678776	0.0966063	0.321113	0.38873	0.12209	0.513176	-0.242526	-0.00332523	-0.134848	-0.392796	-0.474787	-0.224789	-0.152399	-0.248742	0.143278	0.0488363	-0.0331336	0.155754
OPA1	brown	-0.318812	0.0201907	0.291159	0.75363	0.599244	0.175997	0.391271	0.151461	0.503304	-0.173898	0.177145	0.412038	0.442213	-0.053769	0.626441	0.85059	0.554361	-0.339877	-0.4043	-0.0143018	-0.698961	-0.380038	-0.41583	-0.0626832	0.258085	0.526133	0.201072	0.14119	0.657013	-0.109158	-0.448936	-0.472635	-0.366831	-0.44824	-0.265545	-0.341366	-0.381705	-0.128207	-0.157007	-0.184484	-0.123148
SELT	brown	-0.202006	-0.210104	0.039798	0.533379	0.31387	0.200296	0.198614	0.260144	0.56199	-0.491589	-0.12542	0.314566	0.359456	-0.142359	0.396648	0.769788	0.62346	-0.131945	-0.115583	0.170273	-0.418078	-0.0283016	-0.14011	-0.102804	0.238601	0.522279	0.435708	0.344538	0.728289	0.0858942	-0.276204	-0.454124	-0.375154	-0.507724	-0.108035	-0.423692	-0.318374	-0.157385	-0.13748	-0.416646	-0.241129
PJA2	brown	-0.340415	0.0998054	0.343289	0.765079	0.704426	0.259168	0.468192	0.167523	0.600558	-0.241687	-0.00946754	0.191197	0.161195	0.123676	0.597552	0.898983	0.571377	-0.431989	-0.387791	0.0271682	-0.688997	-0.325288	-0.309117	-0.191951	0.197142	0.330999	0.139941	0.190364	0.636459	-0.29208	-0.264811	-0.324958	-0.395925	-0.411395	-0.405575	-0.373478	-0.559904	-0.119372	-0.203201	-0.139739	-0.0474363
CHIC1	brown	-0.257716	0.197888	0.385851	0.767888	0.744634	0.359345	0.51231	0.337111	0.717267	0.0227172	0.344415	0.53778	0.3688	0.0998906	0.717389	0.829122	0.473126	-0.358215	-0.389011	0.0180934	-0.843758	-0.423275	-0.505933	-0.0773354	0.0816558	0.319057	0.14463	0.151799	0.575003	-0.228054	-0.352725	-0.373491	-0.440638	-0.265312	-0.302168	-0.575936	-0.625212	-0.30101	-0.158176	-0.207108	-0.356205
SACM1L	brown	-0.359434	0.192273	0.327318	0.654185	0.670276	0.320683	0.486113	0.150198	0.545856	-0.184599	-0.0673994	0.123412	0.0248171	-0.14694	0.473086	0.758773	0.461693	-0.411773	-0.244463	0.0703911	-0.565178	-0.281326	-0.281205	-0.228231	0.131243	0.145705	0.0279974	0.0933444	0.430473	-0.211848	0.0130952	-0.072631	-0.322271	-0.135516	-0.266091	-0.365609	-0.570119	-0.074638	-0.182829	-0.155177	-0.018872
UBXN2B	brown	-0.184821	0.278213	0.408981	0.544456	0.634747	0.1586	0.344345	-0.0308158	0.384356	-0.139507	-0.00785641	-0.00748356	0.0256878	0.261242	0.470859	0.681616	0.458224	-0.15304	-0.271168	-0.0733475	-0.545938	-0.400406	-0.319512	-0.1645	-0.0539063	0.260937	0.0598687	-0.0126973	0.371632	-0.273115	-0.226158	-0.32819	-0.630316	-0.381925	-0.479107	-0.121623	-0.332924	-0.0798913	-0.151776	0.141155	0.0711706
TMEM167B	brown	0.092012	-0.421825	-0.0271247	0.281504	0.0774902	-0.227744	-0.142487	-0.160278	0.189921	-0.391989	-0.0631444	0.0584683	0.302192	0.384953	0.478647	0.638534	0.662086	-0.275641	-0.348937	-0.138081	-0.22068	-0.176377	0.0629628	0.0836573	0.0519771	0.238761	0.558657	0.132172	0.542268	-0.120145	-0.130835	-0.224196	-0.498812	-0.648787	-0.331094	0.065891	-0.105598	0.062015	-0.0668752	-0.165381	0.229025
SMIM13	brown	-0.140748	-0.0516893	0.0249767	0.630481	0.506897	0.429232	0.393848	0.345995	0.73141	-0.391996	-0.13072	0.24284	0.0695789	0.0480325	0.407772	0.811057	0.536629	-0.364521	-0.114271	0.278855	-0.535578	-0.0588717	-0.106536	-0.0221938	0.172473	0.246441	0.431279	0.361511	0.677092	-0.183621	-0.079378	-0.268931	-0.550885	-0.418266	-0.410846	-0.52956	-0.672559	-0.366083	-0.339697	-0.321962	-0.267744
PARG	brown	-0.106838	0.1236	0.287219	0.669507	0.670411	0.283122	0.459437	0.224761	0.600839	-0.0893149	0.155158	0.366649	0.261591	0.228013	0.634181	0.770215	0.475192	-0.447496	-0.361258	0.0251277	-0.66907	-0.307587	-0.2536	-0.0500479	0.143756	0.156568	0.191779	0.188386	0.533926	-0.24685	-0.221485	-0.278942	-0.433735	-0.321186	-0.305965	-0.507749	-0.585814	-0.286481	-0.2055	-0.238053	-0.293789
PWAR6	brown	-0.0693539	-0.0785175	0.305036	0.506243	0.423531	0.0291123	0.130877	0.210843	0.522579	-0.154163	0.186792	0.390918	0.460189	0.163361	0.664906	0.736611	0.654108	-0.152436	-0.414738	-0.202362	-0.686346	-0.499319	-0.416574	0.0100871	0.305043	0.512059	0.255401	-0.0716605	0.466359	-0.0625577	-0.307064	-0.328643	-0.221517	-0.384386	-0.179087	-0.375168	-0.313926	-0.0818317	-0.000904075	-0.094058	-0.193908
EXTL3	cyan	-0.176029	0.3584	-0.0553423	0.315509	0.350158	0.728216	0.576482	0.477018	0.475442	-0.267172	-0.353079	-0.0809878	-0.322339	-0.466235	-0.169962	0.241649	-0.0355191	0.309863	0.487413	0.583711	-0.3014	0.170607	-0.158589	-0.251729	-0.102399	0.48583	-0.051476	0.20909	0.242487	-0.146958	-0.0869558	-0.385662	0.000890999	-0.221657	-0.355445	-0.343265	-0.418647	-0.273093	-0.399608	-0.157401	-0.162777
SRCIN1	cyan	-0.15049	0.489997	0.105124	0.320749	0.431356	0.822353	0.652395	0.807498	0.630129	0.258872	0.224881	0.442945	-0.0620121	-0.236181	-0.00399914	0.0666345	-0.287709	0.107239	0.39307	0.553955	-0.352477	0.163934	-0.203141	-0.299269	0.216213	0.00266376	-0.214363	0.239518	0.0788925	-0.080466	-0.132246	-0.228797	0.101261	0.244853	-0.0946967	-0.651753	-0.636111	-0.562609	-0.417331	-0.240027	-0.529073
PNPLA6	cyan	-0.14972	0.537564	-0.0164092	0.433841	0.472485	0.750571	0.766173	0.346428	0.321065	0.0681279	-0.209265	-0.240857	-0.632715	-0.254838	-0.245618	0.0913324	-0.379325	-0.0572659	0.336342	0.602999	-0.189847	0.236264	-0.0479824	-0.267304	-0.337188	-0.0109099	-0.298411	0.320053	0.122797	-0.489364	0.00230073	-0.153226	-0.165286	0.0424453	-0.569242	-0.127929	-0.562832	-0.245444	-0.43437	0.134707	0.0652698
APBA2	cyan	-0.198735	0.232908	-0.160095	0.565943	0.383955	0.808773	0.724957	0.584024	0.513924	-0.181941	-0.118894	0.200723	-0.10532	-0.404535	-0.0635374	0.32058	-0.125846	0.0668887	0.437425	0.763586	-0.285823	0.34571	-0.0650378	-0.189144	0.0787511	0.41709	0.0301825	0.528127	0.511703	-0.132671	-0.334115	-0.603604	-0.149406	-0.287877	-0.43142	-0.351203	-0.535675	-0.500948	-0.57608	-0.201096	-0.23584
BCAR1	cyan	-0.204089	0.407258	-0.0625755	0.32296	0.338138	0.815482	0.674567	0.529574	0.450116	-0.0372776	-0.144772	0.0407909	-0.269549	-0.281317	-0.122549	0.168115	-0.196364	0.104389	0.503539	0.727494	-0.196797	0.301851	-0.0392249	-0.289939	-0.141179	0.0991167	-0.118459	0.342593	0.241181	-0.1099	-0.150425	-0.359986	-0.0704215	-0.125796	-0.506092	-0.283492	-0.541087	-0.342778	-0.580345	-0.195648	-0.0314959
NRIP2	cyan	-0.0779041	0.330889	-0.124769	0.275903	0.262018	0.766973	0.609722	0.674272	0.488667	0.0415769	-0.0664412	0.151401	-0.286867	-0.36741	-0.259527	-0.0123184	-0.359615	0.0761571	0.437541	0.636046	-0.159146	0.367687	0.0382262	-0.1842	0.102762	0.00265678	-0.141764	0.416496	0.160064	-0.150469	0.0438818	-0.139544	0.193756	0.214282	-0.105478	-0.518687	-0.597313	-0.402248	-0.363169	-0.167001	-0.314296
CTDP1	cyan	0.0327688	0.103012	-0.286897	0.317117	0.128985	0.752849	0.549562	0.660039	0.491549	-0.196828	-0.136113	0.238514	0.00326161	-0.22989	-0.111494	0.180862	-0.104764	0.162259	0.52894	0.787525	-0.154751	0.387103	0.0265062	-0.16537	0.00377396	0.323903	0.169323	0.444055	0.403167	0.0101836	-0.348476	-0.565168	-0.112262	-0.302969	-0.37423	-0.292106	-0.470637	-0.454835	-0.596118	-0.273402	-0.147447
PRKCZ	cyan	-0.160379	0.477581	0.068936	0.486182	0.535246	0.818885	0.71121	0.613665	0.622152	-0.0111554	-0.0914247	0.0734883	-0.351347	-0.219594	-0.019519	0.28283	-0.159271	0.204096	0.414726	0.573295	-0.456095	0.128513	-0.167247	-0.33696	0.0141719	0.31644	-0.159716	0.30706	0.269627	-0.372674	-0.141106	-0.295319	-0.0645455	-0.121777	-0.460807	-0.495424	-0.709116	-0.375989	-0.398187	-0.0127859	-0.206794
TBC1D25	cyan	-0.0759417	0.462401	0.0426265	0.485986	0.548551	0.847054	0.798993	0.492039	0.562782	-0.0547681	-0.107671	0.0679495	-0.22755	-0.0355937	0.082411	0.379866	-0.0464892	-0.0524422	0.347362	0.672315	-0.396148	0.144038	-0.0961838	-0.188236	-0.16612	0.0732995	-0.0515062	0.313637	0.327025	-0.270045	-0.229114	-0.404455	-0.239131	-0.258599	-0.619159	-0.367986	-0.689291	-0.472443	-0.633901	-0.19909	-0.134221
PPP2R5B	cyan	-0.217044	0.441311	0.0103369	0.446721	0.480634	0.836883	0.770626	0.583046	0.52174	0.0312747	-0.111021	0.0506948	-0.383852	-0.230623	-0.069904	0.184665	-0.256802	-0.0928344	0.371379	0.667961	-0.304934	0.252801	-0.0761119	-0.385941	-0.18812	0.0282103	-0.223952	0.33936	0.199974	-0.319783	-0.0677254	-0.237839	0.0079754	0.077901	-0.414494	-0.383754	-0.69702	-0.294491	-0.42776	-0.125845	-0.0815896
TCOF1	cyan	-0.00695103	0.415168	-0.109368	0.295099	0.358591	0.751304	0.646352	0.465644	0.402748	0.0656323	-0.113347	-0.0329723	-0.480645	-0.176925	-0.239626	0.00155174	-0.374404	-0.0136352	0.399507	0.605931	-0.212735	0.286136	0.0413101	-0.0856859	-0.0188582	-0.0476859	-0.138944	0.343324	0.0942723	-0.388982	0.0696135	-0.0616399	0.0308511	0.110474	-0.388448	-0.358353	-0.642768	-0.47947	-0.528433	0.0140409	-0.180677
MARK2	cyan	-0.0424221	0.524091	-0.00305641	0.270194	0.423956	0.85186	0.673223	0.499756	0.50662	-0.0779906	-0.233734	-0.0219028	-0.357762	-0.181195	-0.132648	0.186708	-0.111773	0.207371	0.572642	0.68929	-0.247598	0.215033	-0.0856037	-0.229989	-0.0902685	0.0782993	-0.0763011	0.206107	0.126061	-0.186852	-0.076759	-0.274247	-0.203766	-0.1468	-0.523161	-0.363648	-0.568716	-0.517959	-0.600468	-0.138921	-0.250213
DNM2	cyan	-0.14266	0.308392	-0.0485172	0.371588	0.268004	0.763259	0.636035	0.70683	0.486825	0.0289887	-0.0922335	0.070367	-0.274756	-0.273189	-0.179755	0.0332988	-0.342176	0.113722	0.399044	0.652763	-0.191941	0.338629	-0.0432186	-0.365189	-0.0819794	0.256634	-0.249592	0.363067	0.17692	-0.171676	-0.153856	-0.378878	0.0585205	0.0144436	-0.261998	-0.32448	-0.531884	-0.194085	-0.260205	-0.0463261	-0.0735191
CTTN	cyan	-0.171535	0.387327	-0.0167949	0.355134	0.308529	0.712913	0.700948	0.596219	0.349763	0.450468	0.427482	0.428242	0.0207751	-0.136881	0.0370023	-0.0221161	-0.433413	-0.139529	0.249477	0.601588	-0.238838	0.219976	-0.160006	-0.238811	-0.0916264	-0.105157	-0.221255	0.329356	0.137673	-0.211378	-0.372896	-0.350337	0.0776074	0.135352	-0.312381	-0.219695	-0.48238	-0.471284	-0.510391	-0.195789	-0.197432
POMGNT1	cyan	-0.100353	0.249087	-0.177166	0.304363	0.275189	0.799187	0.632957	0.651785	0.497559	0.0144442	-0.0495812	0.173541	-0.25856	-0.210467	-0.150285	0.0756825	-0.281915	-0.0737398	0.406308	0.710231	-0.17849	0.403955	0.0763836	-0.176816	-0.0181566	0.0316792	-0.0405149	0.445396	0.227667	-0.122559	-0.0856686	-0.279661	0.0549839	-0.0105455	-0.282272	-0.473419	-0.631484	-0.521948	-0.521951	-0.28834	-0.323911
GNAO1	cyan	-0.310005	0.457675	0.0228205	0.446197	0.440059	0.770795	0.697138	0.464183	0.470626	-0.0683663	-0.102565	0.0736701	-0.235292	-0.482054	-0.117417	0.248012	-0.140173	0.153387	0.371958	0.5949	-0.332666	0.142744	-0.268285	-0.195804	-0.107057	0.337073	-0.135085	0.278308	0.29495	-0.206941	-0.258954	-0.474222	-0.125348	-0.125241	-0.415527	-0.263893	-0.404046	-0.304495	-0.471151	-0.198769	-0.141259
MCOLN1	cyan	-0.0112578	0.442704	-0.00632658	0.267195	0.330221	0.779468	0.629422	0.624771	0.494152	0.170215	0.0171645	0.177549	-0.244175	-0.0898456	-0.111508	-0.00128706	-0.349475	0.014967	0.407035	0.631637	-0.237617	0.317751	-0.0390981	-0.236667	-0.122929	-0.0545938	-0.183529	0.343937	0.0957696	-0.262274	-0.149978	-0.207263	0.00439976	0.0907705	-0.264528	-0.46473	-0.592974	-0.49734	-0.450923	-0.143582	-0.370753
DHPS	cyan	-0.104073	0.36707	-0.118706	0.406777	0.381167	0.776448	0.731274	0.480446	0.414357	-0.0425516	-0.247138	-0.159679	-0.531628	-0.123654	-0.2294	0.0966278	-0.366221	-0.122639	0.359005	0.69558	-0.145882	0.424318	0.180382	-0.175037	-0.263194	-0.0503104	-0.181229	0.536439	0.263416	-0.400874	0.0195752	-0.198908	-0.0979854	-0.036359	-0.465353	-0.315067	-0.677468	-0.282361	-0.449488	-0.0664075	0.00178427
DFNB31	cyan	-0.29152	0.444018	0.119248	0.461189	0.457695	0.685218	0.67266	0.584367	0.476093	0.169399	0.0232132	0.0837094	-0.350626	-0.379807	-0.0221213	0.155525	-0.264445	0.0319172	0.197175	0.436802	-0.43287	0.0301909	-0.271641	-0.386694	-0.0647122	0.264446	-0.335322	0.175339	0.137797	-0.329887	-0.0820089	-0.197709	0.166923	0.0857327	-0.434881	-0.319641	-0.597011	-0.172132	-0.360863	0.00440768	0.0252562
MAST3	cyan	0.0860735	0.524821	0.131277	0.2709	0.449492	0.73738	0.553387	0.550656	0.588623	0.0476763	0.0175891	0.200113	-0.122844	0.0536943	0.0439617	0.234644	-0.0485875	0.32327	0.441634	0.478892	-0.388677	0.010801	-0.236608	-0.141323	0.000608756	0.113041	-0.0345566	0.128041	0.147567	-0.253397	-0.272203	-0.307599	-0.292777	-0.20352	-0.370288	-0.47524	-0.546137	-0.529677	-0.494101	-0.160634	-0.365054
SLC35E4	cyan	0.0318676	0.250602	-0.137597	0.363934	0.320844	0.741916	0.620816	0.450674	0.451345	-0.140351	-0.185119	0.0299788	-0.221606	-0.122616	-0.0526318	0.267868	-0.0918964	0.0168246	0.468621	0.711015	-0.148632	0.359501	0.0797944	-0.241761	-0.0823883	0.0711376	0.0387586	0.430959	0.360189	-0.223651	-0.106093	-0.30707	-0.143808	-0.27632	-0.441648	-0.307632	-0.546412	-0.42071	-0.608016	-0.239921	-0.110189
PICK1	cyan	0.00208824	0.200882	-0.144786	0.527759	0.398239	0.801766	0.693626	0.65988	0.663934	-0.0312435	-0.00765563	0.203851	-0.242161	0.020822	0.070767	0.334876	-0.113108	-0.124822	0.266215	0.671155	-0.387318	0.274443	0.00375451	-0.21725	-0.0115938	0.188651	0.100089	0.527991	0.467729	-0.447347	-0.243872	-0.379793	-0.156974	-0.271759	-0.580798	-0.411054	-0.750314	-0.480239	-0.553614	-0.218271	-0.177287
PPP6R2	cyan	0.0175341	0.514567	0.00221691	0.247337	0.29086	0.707599	0.654333	0.514928	0.233721	0.337992	0.210565	0.280297	-0.0580775	-0.229464	-0.14696	-0.131086	-0.486888	0.169319	0.486866	0.623423	-0.128251	0.27051	-0.153469	-0.257258	-0.0959696	-0.0147316	-0.293197	0.240465	0.00176678	-0.0782635	-0.314708	-0.360623	-0.0189403	0.15198	-0.169769	-0.29126	-0.383462	-0.464994	-0.401496	-0.00716592	-0.31338
L3MBTL2	cyan	-0.0258399	0.279077	-0.166135	0.206801	0.216713	0.746272	0.549162	0.636745	0.438671	0.147575	0.156073	0.418973	-0.016614	-0.268636	-0.122	-0.00310107	-0.281412	-0.00235818	0.454464	0.673065	-0.161856	0.355727	-0.0447623	-0.120482	0.133286	0.0137234	0.0263719	0.349051	0.150737	-0.0770296	-0.178429	-0.308303	0.0304029	0.0745709	-0.122068	-0.487182	-0.464822	-0.665694	-0.508575	-0.307966	-0.577282
RANGAP1	cyan	-0.145098	0.38607	-0.164086	0.385976	0.386553	0.852745	0.726351	0.5531	0.494136	-0.0447309	-0.197383	-0.0872887	-0.535711	-0.255506	-0.238167	0.14692	-0.299761	0.0347599	0.462483	0.717852	-0.245207	0.323043	0.0556721	-0.202901	-0.0068101	0.099561	-0.0969995	0.420669	0.249118	-0.437545	0.0696054	-0.170121	0.0160143	-0.0565722	-0.54791	-0.366415	-0.716132	-0.388478	-0.563968	-0.0393174	-0.0581877
TRPC4AP	cyan	-0.152758	0.333527	0.0332903	0.510882	0.428097	0.793127	0.749834	0.663655	0.585404	0.0806645	0.153102	0.429754	0.136789	-0.171596	0.1899	0.328698	-0.05249	-0.0487386	0.241201	0.638889	-0.455895	0.103398	-0.2684	-0.260172	-0.0686181	0.27926	-0.0511226	0.295441	0.364478	-0.0551827	-0.537898	-0.628252	-0.101029	-0.26431	-0.453408	-0.354171	-0.550873	-0.478463	-0.56722	-0.333647	-0.243302
SYNDIG1	cyan	-0.119426	0.321902	-0.0508356	0.364277	0.36466	0.730558	0.592058	0.644419	0.507739	0.0974867	0.0669913	0.285762	-0.150277	-0.248671	-0.097682	0.105667	-0.271707	0.0444577	0.39191	0.588609	-0.239837	0.288974	-0.0105033	-0.144067	0.251703	0.0402299	-0.0834224	0.384939	0.200523	-0.157753	-0.0140425	-0.170799	0.0141073	0.143175	-0.129439	-0.607077	-0.654607	-0.497236	-0.33449	-0.014228	-0.422922
PIGU	cyan	-0.0774114	0.127428	-0.178266	0.42229	0.282338	0.724612	0.591656	0.610562	0.611415	-0.186105	-0.144231	0.166128	-0.155898	-0.0659639	-0.0213378	0.277431	-0.0660301	-0.113863	0.230823	0.636406	-0.33896	0.286943	0.0358966	0.00733501	-0.0785303	0.189137	0.123199	0.496358	0.435198	-0.171777	-0.234514	-0.425721	-0.131443	-0.283697	-0.460905	-0.451397	-0.691715	-0.508473	-0.550188	-0.297695	-0.26571
VAC14	cyan	0.00813136	0.424108	-0.161866	0.239747	0.249732	0.781015	0.651267	0.454037	0.303069	0.106109	0.0235132	0.124605	-0.185999	-0.193451	-0.217441	0.00667423	-0.326535	0.233635	0.574404	0.74661	-0.130289	0.32269	-0.113279	-0.141506	-0.127289	0.134546	-0.0464128	0.333211	0.176751	-0.262504	-0.385206	-0.433025	-0.0458087	-0.176667	-0.472688	-0.154711	-0.345107	-0.601199	-0.671991	-0.123685	-0.265637
HMOX2	cyan	-0.247256	0.390368	-0.0450296	0.582452	0.513795	0.873558	0.842011	0.66906	0.593306	0.0509667	0.0123677	0.191973	-0.267506	-0.259522	-0.0753852	0.218418	-0.314046	-0.117142	0.307405	0.716434	-0.373866	0.339211	-0.0380769	-0.207565	0.0767619	0.150332	-0.141567	0.584322	0.408348	-0.390561	-0.208691	-0.372575	0.0614533	-0.0216049	-0.390913	-0.495926	-0.736144	-0.525829	-0.517897	-0.142496	-0.303784
C16orf62	cyan	0.0056401	0.315826	0.0166595	0.383457	0.373341	0.742596	0.605564	0.616173	0.630359	0.0212288	0.191934	0.50406	0.257365	-0.0574171	0.168942	0.314112	0.0408173	0.0475568	0.269142	0.566399	-0.483858	0.0596411	-0.287343	0.0386818	0.076016	0.228232	0.153299	0.276693	0.365922	-0.0505634	-0.458528	-0.52986	-0.16581	-0.251188	-0.309584	-0.515634	-0.501561	-0.642525	-0.576118	-0.447036	-0.523958
CORO2B	cyan	-0.217442	0.372005	-0.0649858	0.506061	0.465852	0.870103	0.748833	0.610049	0.584628	-0.0269201	-0.0225423	0.226929	-0.167573	-0.365174	-0.0548435	0.302575	-0.138862	0.0258173	0.432943	0.720822	-0.362726	0.263829	-0.163343	-0.236328	0.076865	0.267326	-0.0246118	0.430137	0.393073	-0.268333	-0.210413	-0.377284	-0.0923233	-0.116784	-0.344617	-0.517558	-0.625547	-0.488609	-0.518331	-0.273219	-0.34509
VPS18	cyan	-0.03905	0.247855	-0.157118	0.479075	0.326432	0.795228	0.701044	0.606366	0.502796	-0.105765	-0.0380152	0.270835	-0.0120283	-0.332101	-0.077343	0.235645	-0.153636	0.0763158	0.395677	0.717299	-0.320855	0.276825	-0.154417	-0.105282	0.0781987	0.404655	0.0424655	0.420051	0.408442	-0.0837028	-0.366149	-0.5984	-0.104862	-0.240312	-0.316436	-0.426145	-0.479605	-0.517333	-0.533182	-0.223663	-0.373783
TUBB4A	cyan	-0.242799	0.409413	0.0205801	0.649275	0.548696	0.903166	0.84774	0.724268	0.669617	0.00199367	0.0107903	0.253675	-0.163284	-0.320553	-0.0049076	0.328158	-0.214665	-0.0217205	0.294278	0.689162	-0.498433	0.21061	-0.209846	-0.239008	0.0389799	0.38199	-0.137411	0.485272	0.460642	-0.318258	-0.353652	-0.515651	-0.0448903	-0.14654	-0.400456	-0.531611	-0.714282	-0.431675	-0.496082	-0.184785	-0.257003
FZR1	cyan	-0.0812151	0.443894	-0.0456234	0.367194	0.368277	0.797513	0.753578	0.553576	0.370529	0.188781	0.100675	0.228561	-0.120778	-0.160388	-0.0860849	0.0696523	-0.318258	0.0119229	0.451199	0.727294	-0.183068	0.320927	-0.0135116	-0.241356	0.0418764	-0.0137888	-0.142962	0.371538	0.182879	-0.0960595	-0.27874	-0.394186	-0.0685403	-0.0409561	-0.401789	-0.303184	-0.527619	-0.549886	-0.616515	-0.160356	-0.230467
PTPRS	cyan	-0.115591	0.462411	0.085308	0.499304	0.508375	0.803098	0.773773	0.571892	0.51345	0.0719908	0.0798065	0.3315	-0.00751802	-0.256175	0.0428083	0.247526	-0.158312	-0.0617518	0.279159	0.615918	-0.358359	0.160299	-0.210691	-0.104204	0.000295654	0.149498	-0.121915	0.324229	0.28662	-0.00512493	-0.378105	-0.54565	-0.251625	-0.138344	-0.305898	-0.440377	-0.504869	-0.582373	-0.56025	-0.2892	-0.417375
GSK3A	cyan	-0.077857	0.397335	-0.148192	0.294426	0.308425	0.840036	0.647734	0.530718	0.467054	-0.142368	-0.276721	-0.114579	-0.440377	-0.235585	-0.260227	0.124831	-0.23623	0.283268	0.631484	0.7607	-0.215294	0.352122	0.0296201	-0.24496	-0.0962209	0.230005	-0.044694	0.366819	0.231684	-0.388529	-0.0528853	-0.290263	-0.0224633	-0.137412	-0.539883	-0.320125	-0.597729	-0.34727	-0.513367	0.00165559	-0.0534799
ZNF574	cyan	-0.091041	0.446015	-0.0453698	0.345489	0.344487	0.727104	0.70599	0.375662	0.261797	0.183997	0.0808059	0.126374	-0.169905	-0.291676	-0.113045	0.0250363	-0.369278	-0.0589764	0.374246	0.648188	-0.184976	0.276462	-0.129617	-0.0513045	-0.273004	0.00701157	-0.192276	0.3342	0.160381	-0.188009	-0.230883	-0.387283	-0.108125	0.0469659	-0.339713	-0.198855	-0.377855	-0.412959	-0.485792	-0.128415	-0.202881
SMG9	cyan	-0.120745	0.316393	-0.256351	0.35488	0.307728	0.738131	0.681035	0.356698	0.302032	0.00748929	-0.170797	-0.147024	-0.593559	-0.253013	-0.306406	0.0425065	-0.393765	-0.158179	0.338123	0.681661	-0.112155	0.379132	0.0970405	-0.105344	-0.221948	-0.0356056	-0.0729004	0.466307	0.216894	-0.429352	0.0316687	-0.141677	-0.0890014	-0.0111957	-0.596753	-0.153539	-0.569494	-0.379443	-0.556087	0.0106173	0.00256002
UNC5B	cyan	-0.108927	0.42637	0.174983	0.409288	0.46765	0.718904	0.621684	0.766003	0.647915	0.210079	0.17114	0.344449	-0.0743386	-0.0507167	0.116638	0.205601	-0.170671	0.00633691	0.212632	0.453747	-0.391727	0.0860743	-0.1964	-0.367364	-0.0234177	0.062908	-0.18876	0.255839	0.183225	-0.22498	-0.218813	-0.336068	-0.0894921	0.0852326	-0.174659	-0.540292	-0.621275	-0.326036	-0.240817	-0.179802	-0.334418
MPP2	cyan	-0.0279736	0.386057	0.0521364	0.352783	0.41665	0.828117	0.650107	0.708414	0.688844	0.0744424	0.165383	0.43323	0.090146	0.0687982	0.167341	0.295918	-0.00861993	0.0593002	0.35033	0.620309	-0.419837	0.114642	-0.179069	-0.166202	0.0643971	0.081718	0.0765292	0.280177	0.295863	-0.0384608	-0.39864	-0.483867	-0.22528	-0.22539	-0.418145	-0.512905	-0.606733	-0.663011	-0.63436	-0.379795	-0.431276
PVRL1	cyan	-0.166633	0.175181	-0.103205	0.512627	0.369179	0.783715	0.585631	0.722553	0.711463	-0.244027	-0.0783143	0.394009	0.0911734	-0.327812	0.0497199	0.414629	0.0877435	0.143621	0.3805	0.656	-0.433998	0.195214	-0.220146	-0.166019	0.119257	0.575994	0.19006	0.399214	0.511578	-0.00899213	-0.400611	-0.677658	-0.291739	-0.34557	-0.314991	-0.570672	-0.554956	-0.535724	-0.455263	-0.357215	-0.480538
AMBRA1	cyan	-0.1681	0.604778	0.143613	0.384563	0.475206	0.811662	0.756048	0.541636	0.468808	0.0894664	0.0186351	0.190589	-0.099723	-0.284832	-0.0117595	0.163676	-0.18392	0.238631	0.410111	0.592732	-0.375142	0.078972	-0.329967	-0.312225	-0.151272	0.288124	-0.258577	0.159039	0.150471	-0.0858022	-0.457841	-0.56686	-0.0419655	-0.107141	-0.361302	-0.270389	-0.371433	-0.385745	-0.474859	-0.158738	-0.247272
RASAL1	cyan	-0.0639701	0.154673	-0.108151	0.392979	0.263635	0.764182	0.558996	0.812102	0.670876	0.019842	0.215431	0.603316	0.259112	-0.111381	0.11621	0.267318	-0.0608243	0.0682564	0.325559	0.656574	-0.395744	0.246106	-0.146671	-0.120025	0.184713	0.33142	0.17517	0.453034	0.463367	0.0180781	-0.531006	-0.641747	-0.0735325	-0.286373	-0.258999	-0.592621	-0.556011	-0.623365	-0.535608	-0.447864	-0.499941
RNF130	cyan	-0.117167	0.350873	-0.0131082	0.400756	0.458913	0.707039	0.56377	0.574781	0.632312	-0.0964216	-0.168897	0.0153779	-0.384093	-0.0172809	-0.0587009	0.276022	-0.0901523	0.0759801	0.320393	0.491967	-0.352994	0.147322	-0.00324426	-0.241277	0.0701287	0.143513	-0.0280772	0.311588	0.250097	-0.419435	0.00567346	-0.170914	-0.200956	-0.113848	-0.432433	-0.480962	-0.732803	-0.377902	-0.354893	-0.0359196	-0.21662
ACTR1B	cyan	-0.0171696	0.309121	-0.00997704	0.460324	0.431977	0.754489	0.683453	0.515668	0.518754	-0.0658169	-0.0623602	0.236125	-0.00907263	-0.0250373	0.122798	0.356171	-0.0106857	-0.0660354	0.381188	0.689107	-0.27273	0.275341	-0.0100812	-0.217521	-0.0981944	0.0920833	0.0224605	0.386577	0.365591	-0.0789943	-0.342039	-0.482052	-0.355247	-0.31818	-0.397523	-0.405191	-0.598005	-0.508049	-0.514108	-0.312746	-0.306448
GORASP2	cyan	-0.198266	0.265262	-0.0106523	0.511624	0.411397	0.733739	0.661492	0.488625	0.582348	-0.28387	-0.23121	0.0785319	-0.110487	-0.287493	0.038892	0.440497	0.0532465	0.0486629	0.287846	0.61222	-0.365223	0.19094	-0.144828	-0.276749	-0.172776	0.36573	0.0252748	0.433099	0.517261	-0.0930329	-0.310217	-0.527368	-0.163271	-0.362799	-0.451292	-0.358786	-0.52142	-0.273115	-0.469445	-0.31259	-0.0881454
KIAA2013	cyan	-0.0380929	0.179826	-0.218283	0.549419	0.331319	0.816945	0.703858	0.627834	0.58429	-0.128703	-0.065239	0.211935	-0.107722	-0.214582	-0.0578461	0.324299	-0.126009	-0.017679	0.363565	0.774026	-0.316705	0.350744	-0.0738929	-0.100124	-0.0699189	0.382533	0.14422	0.573187	0.542132	-0.315308	-0.37907	-0.587081	-0.245526	-0.343062	-0.483438	-0.362139	-0.58782	-0.50642	-0.539519	-0.238483	-0.297136
MAP7D1	cyan	-0.118632	0.441539	-0.0369987	0.442396	0.448351	0.907282	0.78976	0.712435	0.610417	0.0875328	0.00281361	0.174422	-0.289357	-0.0582105	-0.0580615	0.169036	-0.303553	0.012866	0.41023	0.734223	-0.338246	0.291497	-0.0481908	-0.292195	-0.0688144	0.0633856	-0.154269	0.44438	0.282432	-0.356414	-0.281033	-0.383037	-0.0273034	-0.0835793	-0.488825	-0.425508	-0.736197	-0.513165	-0.585418	-0.159603	-0.195743
PREX1	cyan	-0.0571944	0.346905	-0.038501	0.141514	0.152746	0.703393	0.445286	0.716091	0.499279	0.00818591	-0.107483	0.0673159	-0.25038	-0.213113	-0.241898	-0.0456706	-0.257303	0.387817	0.546582	0.575182	-0.143011	0.249816	-0.145455	-0.35078	-0.0106813	0.221643	-0.157734	0.182996	0.0444583	-0.228908	-0.150652	-0.294639	0.0393331	0.0246777	-0.25696	-0.26048	-0.379463	-0.255479	-0.305905	-0.105248	-0.167552
PIGT	cyan	0.00606683	0.352177	0.113817	0.553176	0.483359	0.748284	0.724056	0.671267	0.644158	0.0506307	0.0369766	0.229941	-0.0632863	0.0532885	0.153578	0.329327	-0.12741	-0.124222	0.125216	0.539688	-0.488006	0.101403	-0.197444	-0.209316	-0.208529	0.17596	-0.138545	0.377986	0.383018	-0.342531	-0.415139	-0.444295	-0.121482	-0.211726	-0.391463	-0.468297	-0.71485	-0.3321	-0.397825	-0.207788	-0.16941
EML2	cyan	-0.22243	0.55212	0.143237	0.388689	0.485049	0.793367	0.719381	0.742659	0.552465	0.25207	0.0950885	0.202508	-0.304923	-0.25322	-0.105465	0.0063129	-0.431014	0.0722793	0.337196	0.51505	-0.335558	0.180253	-0.138459	-0.420694	0.0786734	0.0241522	-0.423553	0.256969	0.0216329	-0.257435	-0.069367	-0.176654	0.15769	0.324208	-0.126834	-0.55716	-0.6935	-0.325292	-0.248515	-0.000264114	-0.292873
LRFN3	cyan	-0.105745	0.343991	-0.0880256	0.333558	0.295848	0.721458	0.639011	0.476235	0.34352	-0.114384	-0.207137	0.0628644	-0.171685	-0.43546	-0.176424	0.140101	-0.189666	0.192445	0.531676	0.678207	-0.116076	0.29805	-0.06684	-0.301738	-0.00388091	0.253571	-0.133334	0.275159	0.212064	-0.0431164	-0.211596	-0.400069	-0.0391528	-0.139881	-0.249581	-0.210732	-0.353273	-0.343608	-0.507633	-0.145774	-0.114549
KDM4B	cyan	0.00434525	0.375145	0.067071	0.385844	0.420697	0.714831	0.607159	0.460498	0.547153	-0.0126045	0.0152869	0.249173	0.0525487	0.0256828	0.214047	0.398042	0.132346	0.0834433	0.325603	0.576603	-0.39386	0.0387487	-0.247557	-0.168966	-0.145032	0.205734	0.0985151	0.177396	0.31497	-0.068034	-0.454878	-0.534203	-0.416275	-0.423703	-0.616877	-0.249214	-0.460861	-0.553525	-0.672593	-0.266345	-0.216878
GNAZ	cyan	-0.152902	0.370367	-0.0658005	0.388432	0.413281	0.804745	0.649234	0.572362	0.562228	-0.150717	-0.236802	-0.00803084	-0.383361	-0.198896	-0.137821	0.234275	-0.114284	0.169576	0.535247	0.682929	-0.231138	0.311611	0.0450424	-0.319153	0.168729	0.201774	-0.0313553	0.38913	0.277955	-0.236986	-0.0383991	-0.289492	-0.175029	-0.180111	-0.462733	-0.392781	-0.623692	-0.504253	-0.535135	-0.132264	-0.233304
MGAT3	cyan	-0.246279	0.559867	0.171402	0.294194	0.463271	0.774658	0.630649	0.63134	0.545351	0.0231186	-0.0575	0.127864	-0.234674	-0.240128	-0.0744862	0.129326	-0.172822	0.359632	0.496275	0.527342	-0.307978	0.108886	-0.221586	-0.428802	0.0554951	0.199601	-0.252429	0.146789	0.0686678	-0.0683615	-0.191423	-0.370911	-0.0637581	0.00540832	-0.286821	-0.395062	-0.489642	-0.400718	-0.412465	-0.0834102	-0.256343
FXR2	cyan	-0.0876235	0.409533	-0.0144945	0.404931	0.443866	0.737087	0.6595	0.412353	0.485068	-0.210716	-0.360658	-0.230973	-0.505793	-0.238956	-0.138373	0.267642	-0.0823061	0.207169	0.43898	0.582491	-0.31859	0.189829	-0.00623148	-0.205789	-0.03073	0.268436	-0.107436	0.289699	0.239003	-0.348497	0.0767275	-0.205218	-0.0798688	-0.18326	-0.534836	-0.324099	-0.638183	-0.284441	-0.439856	0.0440095	-0.018798
FCHO1	cyan	-0.019135	0.376813	-0.0252648	0.328982	0.352785	0.775518	0.628238	0.760616	0.56753	0.251374	0.154025	0.2664	-0.252576	-0.10962	-0.0853842	-0.00290241	-0.37517	0.0119879	0.337429	0.556476	-0.309332	0.224013	-0.0684009	-0.201643	0.194208	0.000509701	-0.172827	0.305378	0.0791246	-0.324705	-0.0320704	-0.124642	0.143424	0.203526	-0.239057	-0.531593	-0.685695	-0.506636	-0.42824	-0.0551863	-0.354552
LRRC47	cyan	-0.0677628	0.450552	0.147471	0.514554	0.549995	0.761664	0.766325	0.619135	0.605131	0.137937	0.138539	0.343305	0.00206167	0.0187377	0.211156	0.310881	-0.112648	-0.0963979	0.220678	0.556123	-0.465313	0.112719	-0.108171	-0.224387	-0.0335379	0.0178204	-0.117364	0.354923	0.311593	-0.235908	-0.299884	-0.380333	-0.146637	-0.108534	-0.364398	-0.499697	-0.722996	-0.476544	-0.449699	-0.232574	-0.28919
ACSS2	cyan	-0.0897276	0.186126	-0.137908	0.641279	0.452291	0.817181	0.751103	0.708931	0.692521	0.00999818	0.129481	0.393137	-0.067704	-0.129657	0.123803	0.385032	-0.115142	-0.251675	0.154246	0.662444	-0.491357	0.211673	-0.143347	-0.119543	0.0238742	0.258207	0.10811	0.554441	0.554668	-0.351881	-0.373035	-0.494715	-0.164305	-0.216252	-0.509102	-0.475318	-0.737648	-0.555031	-0.595097	-0.317443	-0.281828
EPHB2	cyan	-0.0640382	0.225589	-0.142724	0.378876	0.288547	0.753863	0.592377	0.6527	0.528865	-0.119632	-0.0437095	0.32118	-0.00894905	-0.179199	-0.0965762	0.207388	-0.156612	0.071161	0.407195	0.692427	-0.231492	0.34303	-0.030451	-0.227581	0.0412465	0.239816	0.0779953	0.476991	0.393793	-0.0113214	-0.354104	-0.544253	-0.226148	-0.24579	-0.258496	-0.5291	-0.54698	-0.508485	-0.440278	-0.304933	-0.386943
DPF2	cyan	0.00358262	0.275716	-0.157623	0.133912	0.155124	0.707478	0.490349	0.45733	0.398667	-0.141517	-0.23777	-0.0522463	-0.31539	-0.168688	-0.213609	0.0365456	-0.145212	0.133134	0.49687	0.663012	-0.077978	0.344565	0.0462792	-0.0564387	-0.150029	0.0422961	0.0375252	0.290156	0.127394	-0.0968802	-0.015306	-0.287892	-0.153485	-0.181128	-0.500108	-0.181869	-0.402747	-0.472469	-0.572928	-0.293464	-0.201445
RAB33A	cyan	-0.01298	0.267296	-0.0541287	0.521288	0.4481	0.818282	0.708082	0.720594	0.71075	-0.066136	-0.0730193	0.192139	-0.222348	-0.00115513	0.0720909	0.319381	-0.112335	-0.0980427	0.273207	0.634462	-0.395343	0.239932	0.0130104	-0.211112	-0.0568945	0.103482	0.000201376	0.478616	0.398971	-0.296325	-0.150924	-0.34595	-0.166777	-0.144637	-0.420949	-0.525482	-0.818726	-0.443796	-0.489909	-0.218207	-0.192913
FAIM2	cyan	-0.226813	0.501891	0.026857	0.410793	0.459864	0.843938	0.756809	0.557349	0.502841	0.0730523	-0.048205	0.073972	-0.273968	-0.339264	-0.0885728	0.19109	-0.205451	0.0801602	0.404882	0.647082	-0.38763	0.127183	-0.228325	-0.223409	-0.0513636	0.207928	-0.176702	0.211181	0.170857	-0.302036	-0.132551	-0.250818	0.0308656	-0.0305456	-0.506099	-0.349602	-0.586269	-0.369911	-0.503569	-0.0540012	-0.14664
SMPD4	cyan	-0.127121	0.632542	0.245729	0.420902	0.556254	0.764295	0.740674	0.608977	0.532694	0.455552	0.427587	0.443579	0.00139906	-0.110147	0.175331	0.130917	-0.259809	0.0135418	0.18553	0.416347	-0.51905	-0.118133	-0.528048	-0.302155	-0.173629	0.0526014	-0.28621	0.0784355	0.0598448	-0.284186	-0.360146	-0.336513	-0.0915583	0.155656	-0.308923	-0.398369	-0.494935	-0.414534	-0.340226	-0.143434	-0.386238
USP20	cyan	-0.0665235	0.47775	-0.0542586	0.26524	0.30988	0.709743	0.676567	0.409316	0.209607	0.250667	0.105445	0.114324	-0.221399	-0.349315	-0.141739	-0.0437365	-0.376096	0.130448	0.457831	0.611394	-0.179186	0.184642	-0.186572	-0.179604	-0.158231	0.100679	-0.23905	0.145554	0.00126425	-0.213432	-0.1768	-0.288719	0.061687	0.0543756	-0.379427	-0.122074	-0.338096	-0.41783	-0.496291	0.000176068	-0.177427
SLC22A23	cyan	-0.266023	0.631022	0.274662	0.361835	0.548955	0.721533	0.674371	0.537058	0.538625	0.0939555	-0.12178	-0.0490232	-0.432866	-0.231824	-0.0331348	0.151601	-0.208863	0.105824	0.268901	0.397782	-0.39683	-0.0300562	-0.303697	-0.458245	-0.272329	0.100403	-0.441612	0.0395581	-0.0198917	-0.356058	-0.0886627	-0.198656	-0.0502801	0.144895	-0.36076	-0.272185	-0.563426	-0.142879	-0.297373	-0.0230807	-0.0161793
ACTR1A	cyan	-0.150847	0.154839	-0.217443	0.649422	0.425731	0.801502	0.748464	0.544391	0.59679	-0.283911	-0.196117	0.104298	-0.183443	-0.273564	-0.0320437	0.455898	-0.00978177	-0.0880499	0.279523	0.738397	-0.398688	0.291438	-0.034215	-0.0543376	-0.00797811	0.473692	0.185323	0.582491	0.629391	-0.293837	-0.287695	-0.569395	-0.221905	-0.422903	-0.587195	-0.384341	-0.655331	-0.466963	-0.577959	-0.218181	-0.188803
SEMA7A	cyan	-0.147128	0.324588	0.0320975	0.556872	0.5008	0.805996	0.741448	0.693502	0.695927	0.00189775	-0.0340323	0.159363	-0.258423	-0.0909785	0.0922065	0.36134	-0.104811	-0.141657	0.194558	0.583283	-0.437979	0.14526	-0.132693	-0.371707	-0.0961323	0.128115	-0.111787	0.393504	0.369195	-0.355473	-0.167403	-0.294246	-0.0937052	-0.0898201	-0.439763	-0.465006	-0.778273	-0.302622	-0.442782	-0.186968	-0.0845635
MAPK8IP3	cyan	-0.192924	0.440481	0.0252003	0.53494	0.510895	0.897936	0.832851	0.615285	0.580465	0.102065	0.0716863	0.277852	-0.0994421	-0.205005	0.0981172	0.314325	-0.138378	-0.0566796	0.367766	0.736351	-0.436956	0.188872	-0.212289	-0.294411	-0.0652861	0.19338	-0.11796	0.340569	0.330444	-0.212038	-0.360837	-0.459166	-0.0837681	-0.175408	-0.54048	-0.411807	-0.676217	-0.519547	-0.611259	-0.226511	-0.243727
BCAS3	cyan	-0.290913	0.498615	0.0565377	0.486844	0.506856	0.859677	0.83018	0.586461	0.525718	0.0904929	-0.00950401	0.166012	-0.231307	-0.302294	-0.0484945	0.186443	-0.261186	-0.0810044	0.309976	0.657199	-0.357029	0.207019	-0.18902	-0.256012	-0.0676287	0.123384	-0.254936	0.321714	0.212149	-0.193222	-0.275436	-0.405763	-0.00295502	-0.0123532	-0.399896	-0.354162	-0.564338	-0.447149	-0.519574	-0.22459	-0.284266
SCYL1	cyan	-0.10095	0.350964	-0.185126	0.293324	0.246023	0.759643	0.625968	0.412151	0.315933	-0.207384	-0.367647	-0.167934	-0.38167	-0.393522	-0.290258	0.122442	-0.20827	0.337571	0.649176	0.767923	-0.113314	0.371313	-0.00387663	-0.295474	-0.212173	0.371023	-0.0837512	0.347643	0.257627	-0.23641	-0.201231	-0.404917	-0.024141	-0.266431	-0.488134	-0.141573	-0.408983	-0.252743	-0.485087	-0.0115686	0.0445146
ARL8A	cyan	-0.077054	0.23513	-0.225168	0.520977	0.374453	0.915276	0.754184	0.733523	0.671261	-0.163627	-0.161243	0.134321	-0.301579	-0.185645	-0.14525	0.267886	-0.208062	-0.0271419	0.435726	0.828449	-0.319176	0.42859	0.0500527	-0.168301	0.0250656	0.245812	0.0793919	0.62545	0.489678	-0.415028	-0.198103	-0.43439	-0.0701481	-0.198395	-0.50052	-0.483352	-0.780706	-0.543491	-0.602113	-0.218323	-0.259174
COPS7B	cyan	-0.0581993	0.226751	-0.0910161	0.514112	0.42885	0.784009	0.682889	0.617759	0.633394	0.00324335	0.117839	0.401561	0.0339519	-0.0788185	0.118569	0.34972	-0.017276	-0.136224	0.271003	0.66145	-0.408019	0.233996	-0.115705	-0.00264503	0.110235	0.195955	0.164021	0.463635	0.447684	-0.209931	-0.283391	-0.441747	-0.215077	-0.227669	-0.41624	-0.55902	-0.641381	-0.66745	-0.526349	-0.330607	-0.562033
DIS3L2	cyan	-0.0062063	0.18966	-0.111678	0.389087	0.323971	0.765182	0.606893	0.653503	0.619115	-0.0189707	0.140569	0.5262	0.198187	0.0036994	0.159614	0.3152	0.0125663	-0.0528159	0.329145	0.691057	-0.365303	0.25296	-0.065536	-0.0359807	0.127677	0.15105	0.205445	0.418673	0.431501	0.0178135	-0.501451	-0.549783	-0.166851	-0.33356	-0.386522	-0.50855	-0.589684	-0.764076	-0.707768	-0.469275	-0.49147
VLDLR	cyan	-0.14548	0.315984	0.115394	0.542534	0.552545	0.789001	0.68189	0.772601	0.808193	-0.00778706	0.0959925	0.413586	-0.0195389	-0.110647	0.222379	0.40246	0.0172255	-0.12304	0.110309	0.476076	-0.590999	0.0257633	-0.247266	-0.178099	0.166873	0.23842	-0.0117617	0.321451	0.383073	-0.0969645	-0.259875	-0.429196	-0.0612982	-0.110764	-0.324479	-0.675695	-0.742811	-0.579126	-0.511628	-0.330388	-0.45043
FAM171A1	cyan	-0.0735062	0.256276	-0.121937	0.572834	0.420185	0.762523	0.701123	0.52101	0.541867	-0.157263	-0.0471589	0.220688	-0.0670327	-0.279018	-0.0187549	0.36534	-0.0535785	0.0502112	0.285717	0.631112	-0.42037	0.156947	-0.279219	-0.104866	0.00443072	0.533783	0.0932733	0.424915	0.518416	-0.275139	-0.476402	-0.661661	-0.210103	-0.389852	-0.436884	-0.349278	-0.44009	-0.475362	-0.496724	-0.257675	-0.34736
DHX37	cyan	0.0162867	0.421678	0.00932903	0.30038	0.305054	0.734167	0.622943	0.57964	0.428141	0.00162049	-0.0587986	0.23682	0.0132207	-0.204107	-0.0848956	0.110916	-0.201188	0.220149	0.497615	0.672329	-0.200996	0.266466	-0.102951	-0.198857	-0.12509	0.139152	-0.123459	0.299265	0.205436	-0.0512122	-0.435869	-0.501157	-0.13833	-0.137401	-0.284119	-0.327276	-0.459258	-0.459612	-0.525777	-0.192805	-0.234635
DPYSL4	cyan	-0.163162	0.295633	-0.190131	0.353617	0.243792	0.783997	0.635362	0.554926	0.39564	-0.0573898	-0.0427173	0.186648	-0.168143	-0.463624	-0.197604	0.106468	-0.261128	0.18274	0.512458	0.740012	-0.151769	0.359226	-0.0895322	-0.228624	-0.0606428	0.30132	-0.0305072	0.410118	0.306949	-0.0061121	-0.320305	-0.544602	-0.107671	-0.163647	-0.367595	-0.231873	-0.383953	-0.490149	-0.591329	-0.241958	-0.213922
ELMO1	cyan	-0.251491	0.380732	-0.0260877	0.417112	0.426781	0.855638	0.675123	0.684297	0.669697	-0.0675802	-0.14424	0.115459	-0.329916	-0.370949	-0.108768	0.227282	-0.157503	0.0895907	0.425423	0.64627	-0.383285	0.233158	-0.128787	-0.259226	0.0969422	0.230582	-0.108606	0.342454	0.257302	-0.317822	-0.0338058	-0.199953	0.0862955	0.0266504	-0.362817	-0.536981	-0.712073	-0.394498	-0.435642	-0.175325	-0.271958
WIPI2	cyan	-0.144596	0.296827	-0.167861	0.271321	0.294865	0.752897	0.558287	0.457763	0.472725	-0.254943	-0.324233	-0.0508474	-0.322623	-0.283026	-0.174878	0.240034	-0.0220905	0.234278	0.578457	0.695891	-0.158023	0.308358	0.00302391	-0.231327	0.0103272	0.282	0.0995853	0.326291	0.28417	-0.179078	-0.0754829	-0.343764	-0.162461	-0.320476	-0.518107	-0.253553	-0.423368	-0.498675	-0.598847	-0.236997	-0.24567
LSS	cyan	-0.144382	0.338643	-0.0782201	0.449862	0.343626	0.785967	0.693545	0.697919	0.546254	0.102264	0.0408559	0.157919	-0.270344	-0.181444	-0.0909512	0.101984	-0.32221	-0.0158254	0.295435	0.622733	-0.315098	0.22548	-0.141352	-0.309419	-0.121843	0.16896	-0.167477	0.375583	0.239189	-0.391669	-0.234906	-0.376787	-0.0175154	0.0127466	-0.447426	-0.259666	-0.59288	-0.354775	-0.423579	-0.0883867	-0.12359
SAFB	cyan	-0.0260361	0.325177	-0.131152	0.423093	0.393385	0.697989	0.685429	0.42023	0.374112	0.0977581	-0.000822665	0.0319	-0.395904	-0.0565092	-0.0850308	0.131918	-0.305792	-0.120975	0.301762	0.608842	-0.218266	0.311233	0.161436	-0.151361	0.0756398	-0.0172381	-0.0739718	0.454008	0.260616	-0.346822	-0.0390016	-0.178403	-0.0456789	-0.0880713	-0.510767	-0.291687	-0.652854	-0.452862	-0.564442	-0.00392658	-0.0520004
ALKBH4	cyan	0.0585763	0.0958826	-0.219304	0.374736	0.233773	0.747767	0.57107	0.649539	0.55879	-0.114742	-0.0345636	0.343182	0.0276129	-0.140931	-0.00837108	0.238027	-0.0723253	-0.0461165	0.411331	0.761768	-0.197464	0.460187	0.0848591	-0.0731238	0.0431178	0.190562	0.187648	0.557887	0.445352	-0.0472707	-0.290935	-0.487875	-0.124471	-0.268322	-0.274103	-0.503239	-0.554967	-0.647392	-0.554053	-0.389536	-0.492857
SLC45A1	cyan	-0.213058	0.312019	-0.103852	0.379896	0.291152	0.786837	0.690664	0.602852	0.420109	-0.0383478	-0.107451	0.174688	-0.123248	-0.480201	-0.141006	0.119377	-0.269914	0.120196	0.446874	0.711171	-0.256575	0.305847	-0.129248	-0.2265	-0.0853678	0.343672	-0.191941	0.350496	0.266636	-0.0972818	-0.32972	-0.462307	0.217788	-0.0888245	-0.252154	-0.359414	-0.478437	-0.314716	-0.439313	-0.20679	-0.165831
IGSF8	cyan	0.00681006	0.392446	0.0394547	0.343774	0.396453	0.794075	0.682573	0.65466	0.569813	0.240545	0.208539	0.310408	-0.0803932	0.123687	0.124132	0.15962	-0.219411	-0.123328	0.267439	0.609571	-0.348498	0.180267	-0.0870845	-0.168223	-0.0929731	-0.143194	-0.0829997	0.323832	0.208847	-0.235372	-0.262723	-0.286901	-0.049798	-0.0477949	-0.464961	-0.419605	-0.677458	-0.541305	-0.614495	-0.236828	-0.21367
NCSTN	cyan	-0.14129	0.481272	0.093718	0.407539	0.438676	0.706298	0.648593	0.422332	0.477107	-0.0890629	-0.216259	-0.0849808	-0.3696	-0.230324	-0.122291	0.198996	-0.139557	0.0899022	0.264013	0.481281	-0.366184	0.0664766	-0.24481	-0.128378	-0.208726	0.252896	-0.203031	0.200178	0.184708	-0.321159	-0.201302	-0.325278	-0.124405	-0.115481	-0.420597	-0.28582	-0.4805	-0.230386	-0.307696	-0.0679139	-0.152275
ADCK3	cyan	0.0656206	0.369019	-0.113594	0.325523	0.342679	0.733243	0.640093	0.392569	0.405251	-0.0139355	-0.146127	-0.0353977	-0.375822	0.0226647	-0.0734858	0.175138	-0.178786	-0.0666169	0.378195	0.66158	-0.190725	0.256765	0.00266714	-0.150372	-0.367366	-0.0616989	-0.00736084	0.331447	0.215854	-0.39045	-0.216579	-0.327546	-0.308122	-0.190745	-0.676937	-0.098837	-0.550864	-0.496823	-0.687657	-0.116861	-0.0412053
TRIM46	cyan	0.0708504	0.268361	-0.0886882	0.217853	0.223404	0.734253	0.529312	0.671347	0.52698	0.194564	0.316301	0.500663	0.119186	-0.0620166	0.0693863	0.0686575	-0.189842	0.118908	0.365053	0.567479	-0.337669	0.158598	-0.168019	-0.0155863	0.137738	0.0762692	0.0802016	0.268905	0.201758	-0.0467416	-0.288303	-0.372442	0.0918936	-0.0537407	-0.254106	-0.495032	-0.486666	-0.664549	-0.574892	-0.327654	-0.482418
ADORA1	cyan	-0.202572	0.26297	-0.141093	0.460879	0.297869	0.779068	0.688299	0.692953	0.477685	-0.0359977	-0.0402945	0.256516	-0.1184	-0.410403	-0.196784	0.0965212	-0.316862	0.01874	0.377175	0.711398	-0.185791	0.391588	0.00426322	-0.193449	0.142678	0.28121	-0.113214	0.494602	0.326468	0.0038538	-0.307425	-0.545007	-0.0660436	-0.0730001	-0.220449	-0.385449	-0.515592	-0.451634	-0.463911	-0.194449	-0.269085
DUSP7	cyan	0.00574754	0.369838	0.0265669	0.188673	0.350757	0.763519	0.497063	0.644642	0.680692	0.0125386	-0.00778342	0.207995	-0.165864	0.0711901	0.0720897	0.22671	0.0150678	0.126517	0.421232	0.546136	-0.340403	0.137888	-0.0849698	-0.219939	-0.0416872	-0.0394251	0.0810451	0.202139	0.15393	-0.190989	-0.0330652	-0.204189	-0.144125	-0.0499558	-0.396348	-0.529739	-0.642946	-0.511643	-0.489466	-0.330159	-0.366399
LARP6	cyan	-0.0848499	0.327072	0.055948	0.614346	0.528431	0.838808	0.752565	0.810477	0.794756	-0.0037401	0.0875936	0.405101	0.0121554	-0.067475	0.177847	0.399199	-0.0586546	-0.0287858	0.23638	0.60477	-0.538603	0.125166	-0.192732	-0.274862	0.0957488	0.244273	-0.0182255	0.436404	0.457457	-0.27948	-0.348721	-0.509585	-0.148454	-0.144965	-0.363256	-0.616949	-0.807423	-0.511604	-0.484298	-0.219752	-0.342107
SMPD1	cyan	-0.0393168	0.167474	-0.182669	0.477531	0.240372	0.775847	0.644016	0.718528	0.564424	-0.116113	-0.0514035	0.306269	0.0282791	-0.274866	-0.0680675	0.205035	-0.190777	0.0822925	0.356036	0.723672	-0.315207	0.334775	-0.102011	-0.0842774	-0.123186	0.465017	0.0292349	0.516601	0.469542	-0.125069	-0.519719	-0.684784	-0.0951682	-0.312822	-0.313454	-0.393749	-0.513005	-0.452542	-0.462429	-0.301507	-0.297507
APBB1	cyan	-0.121705	0.520781	0.0865136	0.506615	0.561909	0.940767	0.835446	0.762414	0.703248	0.0722641	0.031327	0.305472	-0.136905	-0.1789	0.0498167	0.262331	-0.179007	0.0377079	0.389331	0.689409	-0.469257	0.169186	-0.195623	-0.228676	-0.022867	0.140641	-0.152766	0.346431	0.273308	-0.186194	-0.270092	-0.429027	-0.121811	-0.0626744	-0.391536	-0.588171	-0.754286	-0.578618	-0.544236	-0.256444	-0.406971
FAM102A	cyan	-0.117949	0.493301	0.0641496	0.153869	0.305084	0.789418	0.524799	0.698061	0.569161	0.0932349	0.080181	0.294682	-0.0390689	-0.178353	-0.0493743	0.0811127	-0.146457	0.463896	0.596208	0.591929	-0.314292	0.140348	-0.243535	-0.239781	0.0308239	0.206513	-0.0797835	0.14611	0.087575	-0.138613	-0.29095	-0.412179	0.00401464	-0.0431362	-0.290123	-0.439651	-0.441212	-0.499254	-0.472178	-0.24244	-0.395502
SLC27A4	cyan	-0.196355	0.481377	0.0181493	0.500605	0.496108	0.929263	0.838067	0.750284	0.614434	0.115872	0.0676131	0.31556	-0.143999	-0.301529	-0.0579191	0.171466	-0.306161	-0.0138417	0.377372	0.716611	-0.389031	0.251165	-0.184893	-0.29331	0.0287219	0.162749	-0.207736	0.403538	0.272961	-0.179433	-0.306878	-0.44796	0.0372066	0.026181	-0.276221	-0.570608	-0.682195	-0.523925	-0.484597	-0.229495	-0.413357
TUBA1A	cyan	-0.166723	0.200391	-0.160526	0.581733	0.407972	0.784901	0.753709	0.660423	0.567855	-0.0495947	-0.0357019	0.198853	-0.193616	-0.104458	-0.0471705	0.252364	-0.251576	-0.221247	0.208031	0.69916	-0.316303	0.3698	0.100097	-0.123666	0.0303476	0.181115	-0.0187257	0.618129	0.478887	-0.290935	-0.298603	-0.47641	-0.0919334	-0.211965	-0.471724	-0.393789	-0.730279	-0.527657	-0.596732	-0.194182	-0.18191
OTUB1	cyan	-0.142409	0.178148	-0.282662	0.442532	0.232744	0.797426	0.669195	0.599862	0.436382	-0.127698	-0.0924006	0.1677	-0.141469	-0.381221	-0.201361	0.153395	-0.278397	0.168407	0.519947	0.81708	-0.248111	0.452425	0.0208544	-0.129419	0.0440326	0.456704	0.0507524	0.59626	0.483505	-0.280946	-0.316903	-0.523299	0.119587	-0.262319	-0.423676	-0.367652	-0.54159	-0.428816	-0.510735	-0.137409	-0.176883
HID1	cyan	-0.129422	0.396109	0.012629	0.434142	0.414708	0.852004	0.708879	0.776677	0.661911	0.224954	0.252316	0.431159	-0.0352691	-0.166791	0.0816851	0.197652	-0.200136	0.0024454	0.281731	0.610632	-0.46946	0.106963	-0.304716	-0.227565	0.0270948	0.203418	-0.0734108	0.289857	0.261263	-0.238085	-0.340236	-0.41327	-0.0248402	-0.0384533	-0.424829	-0.48845	-0.620179	-0.518698	-0.515881	-0.266194	-0.366721
HR	cyan	-0.151204	0.355815	0.0102505	0.174131	0.235977	0.715218	0.51564	0.685516	0.49497	0.218643	0.180526	0.406057	0.0239525	-0.271039	-0.032645	-0.00365266	-0.251743	0.127711	0.452141	0.565235	-0.231769	0.237593	-0.106651	-0.22527	0.154883	-0.0350997	-0.168368	0.213395	0.0371155	-0.0211499	-0.104381	-0.128235	0.225079	0.227071	-0.0231844	-0.530829	-0.526546	-0.447546	-0.339739	-0.290977	-0.425316
XPO6	cyan	-0.0195467	0.215583	-0.0951656	0.465049	0.336439	0.749186	0.594137	0.673364	0.603397	-0.0565071	0.151906	0.531764	0.239548	-0.206342	0.128205	0.345389	0.00115094	0.141807	0.354077	0.641593	-0.426534	0.155483	-0.245771	-0.102899	0.0541324	0.463137	0.187875	0.365776	0.466968	0.0206096	-0.550861	-0.731088	-0.288087	-0.364791	-0.359078	-0.50238	-0.503214	-0.647036	-0.56649	-0.329221	-0.484233
OTUD7A	cyan	-0.263287	0.606479	0.295973	0.333873	0.533211	0.691276	0.627942	0.441896	0.524256	0.0697847	-0.0920101	-0.00305857	-0.300481	-0.215376	0.0702591	0.260847	-0.0264445	0.100552	0.27631	0.404676	-0.384875	-0.0364055	-0.296055	-0.385626	-0.243363	0.0659116	-0.31084	0.0270762	0.0497658	-0.254482	-0.0812991	-0.21395	-0.0605047	0.0524916	-0.380966	-0.258123	-0.464902	-0.166151	-0.318336	-0.128288	-0.0762512
PELI3	cyan	-0.0918258	0.364519	-0.08706	0.387685	0.354787	0.806591	0.672208	0.648731	0.488162	-0.105059	-0.174341	0.087126	-0.259642	-0.410633	-0.206628	0.11943	-0.287903	0.319786	0.586723	0.704005	-0.244319	0.374047	-0.00357965	-0.289244	0.0851079	0.369042	-0.146369	0.449004	0.294702	-0.220637	-0.114286	-0.389611	0.129384	-0.0545692	-0.176429	-0.53724	-0.564494	-0.34152	-0.34043	-0.0580582	-0.27267
SEZ6L2	cyan	-0.131439	0.392452	-0.012656	0.460356	0.40193	0.77334	0.744003	0.625113	0.483389	0.100972	0.0519483	0.178227	-0.185058	-0.228304	-0.0466953	0.128695	-0.295687	0.0175235	0.285454	0.600704	-0.423527	0.138007	-0.1682	-0.246287	-0.0148176	0.213734	-0.218998	0.286183	0.21363	-0.292433	-0.224835	-0.364601	0.197295	0.0616709	-0.422936	-0.384975	-0.66462	-0.303655	-0.448411	0.0353461	-0.0464982
DSCAML1	cyan	-0.19353	0.368968	0.050564	0.128992	0.225878	0.74591	0.4862	0.763168	0.564748	0.134477	0.135365	0.40356	0.0378336	-0.309938	-0.0188683	0.0207087	-0.162983	0.289461	0.465017	0.544707	-0.316765	0.15226	-0.204293	-0.233344	0.184229	0.179479	-0.133592	0.120104	0.0436492	0.168001	-0.179379	-0.279127	0.306042	0.0907613	-0.141709	-0.545609	-0.462974	-0.482579	-0.465056	-0.346163	-0.415875
FKRP	cyan	-0.174655	0.363738	0.0120183	0.316024	0.328514	0.701012	0.587178	0.603697	0.455761	0.0370575	-0.0154027	0.272199	-0.0689443	-0.432163	-0.117599	0.108937	-0.234768	0.0846975	0.435061	0.591446	-0.201876	0.285911	-0.134869	-0.303424	0.0305581	0.12738	-0.168471	0.318036	0.191766	-0.110983	-0.166605	-0.275936	0.0456776	0.110093	0.0153934	-0.476518	-0.453124	-0.323639	-0.317659	-0.296939	-0.354137
SLC35C1	cyan	-0.196641	0.413064	-0.0668238	0.335789	0.35231	0.706101	0.614747	0.385413	0.356209	-0.168871	-0.359402	-0.201451	-0.460923	-0.395423	-0.291775	0.138922	-0.222291	0.165466	0.510742	0.629477	-0.139212	0.301561	-0.0466832	-0.271858	-0.235402	0.212077	-0.161815	0.322563	0.192028	-0.406357	0.0121882	-0.217635	-0.161379	-0.0648741	-0.352293	-0.234706	-0.448233	-0.172997	-0.268549	0.01613	-0.0899719
GRID1	cyan	-0.245612	0.385578	0.0879709	0.377633	0.37248	0.723481	0.629855	0.58392	0.513702	-0.0532118	-0.0274288	0.272731	0.0530354	-0.376066	0.0229729	0.209167	-0.0517647	0.178503	0.330628	0.548997	-0.37902	0.109818	-0.285535	-0.155178	-0.0278866	0.407918	-0.131385	0.195208	0.235551	0.142723	-0.404154	-0.593374	0.0173346	-0.157631	-0.249353	-0.375466	-0.349683	-0.38033	-0.402819	-0.314618	-0.350195
SPNS2	cyan	-0.0854089	0.378939	-0.0731963	0.107232	0.223846	0.743281	0.482634	0.583789	0.450627	0.0117946	-0.0734842	0.129038	-0.228026	-0.279254	-0.152789	0.0347928	-0.178252	0.352261	0.553209	0.590765	-0.219932	0.199546	-0.152566	-0.271093	-0.0261706	0.217865	-0.0647496	0.157718	0.0692741	-0.0919014	-0.0777766	-0.250421	0.177299	-0.0345935	-0.30568	-0.40661	-0.424345	-0.416679	-0.424829	-0.127462	-0.294514
TANGO2	cyan	-0.185847	0.483855	0.0876427	0.416049	0.439809	0.708624	0.663617	0.544042	0.398726	0.0100264	-0.0631054	0.183629	-0.13029	-0.45598	-0.121378	0.135634	-0.215719	0.267731	0.46043	0.553635	-0.234823	0.181678	-0.210822	-0.358569	0.0986088	0.340533	-0.257424	0.213823	0.137808	-0.0333272	-0.285427	-0.48597	-0.135566	-0.0424257	-0.150013	-0.363069	-0.375185	-0.39599	-0.304709	-0.0842468	-0.396766
PLA2G6	cyan	-0.0311394	0.241555	-0.078189	0.2779	0.269189	0.732353	0.523484	0.747758	0.604148	0.212304	0.311338	0.584996	0.132149	-0.0800456	0.0849369	0.126307	-0.14796	0.0329978	0.317598	0.570344	-0.393536	0.1753	-0.194515	-0.0675912	0.165448	0.168094	0.0948044	0.288101	0.222302	-0.175867	-0.365429	-0.374614	0.0683578	-0.0404473	-0.200894	-0.586852	-0.550727	-0.634429	-0.443478	-0.398753	-0.605634
RNF220	cyan	-0.108757	0.402166	-0.0172016	0.466757	0.501672	0.859405	0.715639	0.671508	0.704364	-0.0229771	-0.0844394	0.121573	-0.360969	-0.103459	-0.0117876	0.291756	-0.12948	-0.0482858	0.326144	0.625181	-0.422258	0.198415	-0.0699686	-0.205665	-0.0330045	0.0898672	-0.03408	0.393122	0.307138	-0.416456	-0.0557002	-0.241915	-0.15026	-0.0572269	-0.494834	-0.537264	-0.797186	-0.47655	-0.482637	-0.180523	-0.290395
BLOC1S3	cyan	-0.0552904	0.299329	-0.148021	0.374391	0.307836	0.757668	0.609189	0.529929	0.490015	-0.100562	-0.0649415	0.117977	-0.188288	-0.256267	-0.16687	0.170954	-0.17047	0.168889	0.425539	0.650378	-0.312901	0.227943	-0.151954	0.013347	-0.0158925	0.341676	0.0619806	0.365541	0.326106	-0.343875	-0.201918	-0.459533	-0.150537	-0.181508	-0.445685	-0.353336	-0.49546	-0.434271	-0.434261	-0.105544	-0.280482
FAM53B	cyan	-0.105407	0.424208	-0.00841608	0.354083	0.411982	0.833427	0.663684	0.734384	0.628294	0.119263	0.0255023	0.186892	-0.279287	-0.176883	-0.0754834	0.144602	-0.233519	0.136876	0.426877	0.623743	-0.356906	0.231992	-0.0392668	-0.204775	0.18773	0.107955	-0.111801	0.335	0.182963	-0.306396	-0.0350642	-0.186385	0.0827821	0.0450731	-0.351835	-0.555474	-0.738794	-0.496765	-0.504681	-0.0954702	-0.286185
ELAVL3	cyan	-0.156129	0.316903	-0.0750651	0.286852	0.333001	0.835104	0.569821	0.636794	0.638777	-0.195534	-0.19878	0.122643	-0.238123	-0.247286	-0.0910149	0.254113	-0.0387592	0.211722	0.545385	0.697588	-0.302459	0.279959	-0.0495888	-0.22856	0.0395654	0.233438	0.0534484	0.326909	0.280574	-0.109541	-0.0822696	-0.35458	-0.0791529	-0.176828	-0.441345	-0.507761	-0.637323	-0.521736	-0.585267	-0.304129	-0.300947
SLC6A9	cyan	-0.12444	0.317733	-0.0864778	0.352086	0.319774	0.838372	0.609868	0.776835	0.674546	-0.133132	-0.214408	0.120436	-0.285494	-0.3473	-0.174047	0.179437	-0.146865	0.173463	0.47333	0.674878	-0.289628	0.286714	-0.095128	-0.285162	0.119003	0.291143	-0.0552882	0.350686	0.265006	-0.255707	-0.135232	-0.310742	0.0679577	-0.065824	-0.355701	-0.457432	-0.589204	-0.444194	-0.486622	-0.236547	-0.309261
GRK6	cyan	0.0809675	0.258631	-0.238027	0.308821	0.234314	0.812751	0.586065	0.580103	0.463151	-0.258626	-0.29464	0.0663706	-0.225757	-0.386334	-0.259083	0.147927	-0.153781	0.324912	0.689224	0.803776	-0.133785	0.415277	0.00710629	-0.124054	0.0352224	0.370196	0.0862671	0.398741	0.304843	-0.0797244	-0.199072	-0.483728	-0.154512	-0.254755	-0.351213	-0.363921	-0.466144	-0.558698	-0.576312	-0.157374	-0.326715
RUSC2	cyan	-0.170654	0.459699	0.0174706	0.276799	0.37303	0.841704	0.645254	0.591612	0.530616	-0.0235528	-0.0699403	0.17058	-0.150697	-0.300932	-0.0690856	0.168027	-0.111177	0.252315	0.549073	0.665713	-0.325171	0.158724	-0.237715	-0.232824	-0.0338401	0.206689	-0.0983367	0.166608	0.148113	-0.0850547	-0.176117	-0.356614	0.0265775	-0.0778601	-0.391902	-0.420512	-0.507446	-0.437544	-0.506451	-0.241631	-0.295179
ATG9A	cyan	-0.138562	0.518108	-0.0136638	0.40667	0.449394	0.854007	0.769702	0.476993	0.468636	-0.0229157	-0.139597	0.00373787	-0.305493	-0.238949	-0.0976393	0.214129	-0.180707	0.137716	0.462242	0.696341	-0.314339	0.177926	-0.208478	-0.205048	-0.310423	0.228625	-0.143471	0.27053	0.231213	-0.297364	-0.302506	-0.471108	-0.217293	-0.225567	-0.566581	-0.201698	-0.480787	-0.429125	-0.585862	-0.183769	-0.159318
INF2	cyan	-0.224059	0.34274	-0.0162546	0.550508	0.461863	0.841613	0.739428	0.739399	0.621561	0.0758188	0.0659896	0.3489	-0.102628	-0.412944	0.00390539	0.269805	-0.204237	-0.0445188	0.328201	0.652565	-0.388662	0.214161	-0.186637	-0.247051	0.139302	0.254938	-0.127201	0.38029	0.330679	-0.141937	-0.196919	-0.357942	-0.0337645	-0.0126758	-0.253057	-0.567539	-0.681453	-0.442197	-0.428733	-0.231037	-0.3477
SPRN	cyan	-0.00425561	0.265206	-0.0815683	0.414037	0.368935	0.809528	0.588891	0.709976	0.701954	-0.198166	-0.105664	0.331861	0.0160469	-0.189092	0.0203468	0.349123	0.0619806	0.154801	0.434836	0.660068	-0.402735	0.177044	-0.189052	-0.106603	0.0795412	0.426291	0.167272	0.314534	0.384393	-0.0726244	-0.353913	-0.573688	-0.328675	-0.341182	-0.349358	-0.539604	-0.574305	-0.649334	-0.537072	-0.332542	-0.535904
VAMP2	cyan	-0.209734	0.524172	0.108162	0.508041	0.539871	0.750543	0.726101	0.515469	0.492967	0.0489026	0.0108929	0.13115	-0.237944	-0.249858	-0.0621978	0.201688	-0.250689	0.148978	0.33056	0.519024	-0.427069	0.0940053	-0.21369	-0.263125	-0.0110451	0.299295	-0.22992	0.26515	0.219155	-0.346737	-0.258807	-0.447573	-0.148482	-0.0302552	-0.352062	-0.419258	-0.607639	-0.344114	-0.315182	0.0247435	-0.218285
IQCJ-SCHIP1	cyan	-0.260677	0.528587	0.241672	0.410744	0.524856	0.724657	0.662852	0.678821	0.581842	0.142999	-0.00585711	0.136797	-0.286335	-0.239568	-0.0100944	0.131613	-0.263777	0.0417393	0.244426	0.418025	-0.360922	0.08932	-0.204754	-0.405534	-0.000635519	0.0761093	-0.405101	0.195843	0.0692604	-0.217845	-0.0381585	-0.203427	0.0128727	0.204155	-0.126142	-0.50753	-0.610142	-0.274902	-0.277444	-0.105307	-0.25283
FNTB	cyan	0.00702438	0.1761	-0.223476	0.308615	0.242095	0.777211	0.543103	0.636978	0.59409	-0.26457	-0.281825	0.0739228	-0.31301	-0.257952	-0.179858	0.181329	-0.112556	0.0531287	0.430866	0.67893	-0.22058	0.350186	0.0402884	-0.0874826	-0.0537376	0.237839	0.10023	0.419142	0.310208	-0.126027	-0.0742508	-0.344921	-0.15859	-0.205288	-0.378664	-0.431694	-0.595855	-0.500212	-0.528486	-0.312734	-0.302806
LA16c-366D3.1	cyan	-0.0379506	0.155706	-0.159198	0.266682	0.201068	0.71853	0.496989	0.69612	0.587803	-0.0324545	0.00899479	0.279567	-0.113345	-0.105663	-0.0429945	0.132619	-0.131651	0.0517455	0.366993	0.610019	-0.249009	0.285587	-0.0617645	-0.193994	0.135931	0.179089	0.0870375	0.381607	0.284932	-0.209195	-0.172183	-0.323083	0.0687113	-0.120002	-0.306972	-0.407746	-0.484353	-0.46805	-0.45461	-0.338319	-0.35528
RP11-244O19.1	cyan	-0.175678	0.470453	0.114783	0.342746	0.48991	0.780172	0.615599	0.657091	0.64364	0.12074	0.0113148	0.214108	-0.281531	-0.243707	-0.00226925	0.181034	-0.136697	0.0543502	0.339811	0.489865	-0.398627	0.100918	-0.204157	-0.277813	0.1033	0.0917641	-0.175261	0.177542	0.0799814	-0.249889	-0.0102877	-0.086015	-0.0171625	0.137432	-0.219595	-0.573305	-0.649262	-0.477875	-0.360636	-0.17661	-0.426985
CORO7	cyan	-0.0319331	0.23735	-0.111728	0.41967	0.297394	0.800514	0.637057	0.696016	0.587928	-0.0560704	0.0209603	0.353861	0.0837304	-0.115405	0.0653723	0.28351	-0.0688991	0.168431	0.446857	0.735678	-0.352935	0.272233	-0.126133	-0.152006	-0.0153606	0.389411	0.0927194	0.433411	0.45126	-0.0852605	-0.534972	-0.6367	-0.110638	-0.404336	-0.427253	-0.41631	-0.534837	-0.577692	-0.594194	-0.318105	-0.336281
ARX	darkgreen	-0.154449	0.252658	0.228882	-0.243148	-0.0675117	-0.25796	-0.13532	-0.18928	-0.398683	0.537674	0.289679	-0.0686436	-0.153761	-0.272504	-0.202219	-0.528456	-0.450812	-0.0233197	-0.122997	-0.357713	0.211745	-0.153357	-0.21192	-0.168367	-0.0919796	-0.30776	-0.559592	-0.381909	-0.619702	-0.00828205	0.291204	0.420378	0.312785	0.845157	0.535456	0.228125	0.378337	0.327226	0.464637	0.348415	0.0152329
CACNA1G	darkgreen	-0.220489	0.223451	0.171463	-0.38622	-0.136093	-0.112581	-0.109231	-0.0486672	-0.294419	0.396173	0.14572	-0.0409144	-0.126013	-0.264485	-0.181237	-0.490075	-0.357974	0.0331834	0.0460844	-0.177525	0.290789	-0.0246314	0.0104067	-0.16025	-0.0612479	-0.513796	-0.515488	-0.334786	-0.602364	0.383264	0.371066	0.484791	0.505758	0.719333	0.465833	0.101083	0.224929	0.271058	0.231302	0.0708217	0.133411
DLX6	darkgreen	-0.106606	0.3313	0.271078	-0.138227	0.0674251	-0.119742	-0.00270486	-0.0500047	-0.227561	0.455196	0.246912	0.000285558	-0.105806	-0.240453	-0.161172	-0.428949	-0.43163	-0.0313323	-0.117404	-0.273108	0.0682248	-0.124811	-0.215489	-0.10089	-0.131142	-0.286363	-0.547635	-0.254529	-0.491941	-0.0543569	0.192255	0.267068	0.305836	0.816419	0.519928	0.0057362	0.198202	0.22531	0.430413	0.271346	-0.129215
CACNA2D2	darkgreen	-0.263247	0.273298	0.165972	-0.281294	-0.0754097	-0.0255452	0.00139956	-0.000328103	-0.275389	0.470914	0.212883	0.019319	-0.121636	-0.468811	-0.21198	-0.508873	-0.446106	0.0425836	0.0603198	-0.126223	0.162583	-0.0293354	-0.137007	-0.150643	-0.0376828	-0.312561	-0.570748	-0.329367	-0.601171	0.243184	0.341198	0.439526	0.648746	0.83062	0.50484	-0.00123557	0.188266	0.230419	0.287604	0.133748	-0.0250505
ANK1	darkgreen	-0.198055	0.426933	0.365992	-0.182956	0.0981584	-0.0925451	0.00224021	-0.0308683	-0.211962	0.591896	0.408563	0.0980523	-0.0326757	-0.176052	-0.0615004	-0.408196	-0.410231	0.070674	-0.0366691	-0.268478	0.0450699	-0.170627	-0.244831	-0.276964	-0.149862	-0.38654	-0.572186	-0.313838	-0.546438	0.0471116	0.236455	0.334	0.266155	0.872043	0.517102	-0.0601531	0.142231	0.257727	0.448837	0.286797	-0.0951791
CBLN4	darkgreen	-0.137967	0.457933	0.325452	-0.369108	0.00252807	-0.083319	-0.0831434	-0.0601938	-0.25455	0.526903	0.219619	-0.104169	-0.208247	-0.122884	-0.174225	-0.481892	-0.365704	0.23686	0.129298	-0.213321	0.174828	-0.127434	-0.16311	-0.328975	-0.168539	-0.469623	-0.532519	-0.409035	-0.656409	0.0204991	0.311562	0.444479	0.308447	0.794366	0.310058	0.0852584	0.196222	0.231133	0.309488	0.334665	0.0388799
RPH3A	darkgreen	-0.0386451	0.150816	0.343282	-0.270861	-0.0320869	-0.302738	-0.223515	-0.0815346	-0.184026	0.542752	0.386163	0.108056	0.0323997	0.120898	0.121541	-0.333536	-0.205354	-0.175235	-0.279129	-0.456167	0.0611235	-0.232141	-0.077242	-0.225198	0.00545643	-0.516489	-0.426505	-0.378508	-0.537661	0.158604	0.340234	0.583979	0.358774	0.723998	0.522707	-0.0738874	0.10198	0.304895	0.467899	0.156268	-0.000230727
ANKRD24	darkgreen	-0.0600717	0.365555	0.195129	-0.35507	-0.0777647	-0.0573919	-0.0475676	-0.0425333	-0.32418	0.629501	0.298484	-0.0626615	-0.24326	-0.144418	-0.229177	-0.595616	-0.542284	0.0832856	0.120623	-0.153834	0.244792	-0.0497376	-0.0930374	-0.264942	-0.130821	-0.512777	-0.57085	-0.387018	-0.715899	-0.0594491	0.361918	0.549517	0.383172	0.806662	0.330993	0.147533	0.171589	0.244038	0.256198	0.294638	0.116247
MYO15A	darkgreen	-0.242717	0.259973	0.250221	-0.0834307	0.0578686	-0.166446	0.0501222	-0.193682	-0.33113	0.68032	0.455842	0.0300305	-0.0886053	-0.133892	0.035864	-0.355306	-0.409565	-0.26041	-0.258791	-0.276224	0.0354785	-0.180923	-0.113377	-0.0247742	-0.0920705	-0.466499	-0.554206	-0.265096	-0.467257	-0.0922475	0.2015	0.504674	0.484977	0.685066	0.22955	0.181316	0.0984384	0.286505	0.26655	0.254802	0.201739
NTSR1	darkgreen	-0.0137981	0.210841	0.0790416	-0.471722	-0.219307	-0.0846699	-0.134061	-0.0383854	-0.284855	0.398034	0.146325	-0.0977221	-0.202132	-0.155707	-0.25753	-0.570478	-0.369319	0.12324	0.113801	-0.140735	0.248915	-0.0171295	0.0450975	-0.0641634	0.114298	-0.493836	-0.381632	-0.351351	-0.629289	0.182938	0.391786	0.514061	0.690561	0.673333	0.238846	0.151118	0.202128	0.103631	0.0369745	0.0806951	0.110556
SLC32A1	darkgreen	-0.311541	0.549176	0.465107	0.062545	0.309372	0.0480003	0.22836	0.0765764	-0.092773	0.559696	0.341419	0.0770755	-0.111464	-0.276464	-0.0337423	-0.31984	-0.452909	0.0238537	-0.107476	-0.222426	-0.143046	-0.2327	-0.385327	-0.328649	-0.137843	-0.170832	-0.726639	-0.279836	-0.474331	-0.0562175	0.0957203	0.155966	0.286103	0.843098	0.414682	-0.120776	0.0229345	0.223987	0.428535	0.406678	-0.126512
[truncated: 3,872 more rows]
