# Supplementary material for: Comprehensive transcriptomic analysis indicates brain regional specific alterations in type 2 diabetes
Source: Aging (Albany NY). 2019 Aug 26;11(16):6398–421. doi: 10.18632/aging.102196 (PMC6738403; doi:10.18632/aging.102196)
Supplement: Supplementary Table 6 [file aging-11-102196-s003.xlsx]

## Sheet: Sheet1
Supplementary Table 6. Enrichment of regional and cell-type markers in caudate modules at various specificity indices
Three tables corresponds to three different pSIs
Abbreviations: pSI, specificity index; Bonf. Adj., Bonferroni-adjusted P-values
Moudule	Amygdala		Cerebellum		Cortex		Hippocampus		Striatum		Thalamus		Cholin. neurons of basal forebrain		Cholin. neurons of brain stem		Seroton. neurons of brain stem		Astroglia of cerebellum		Oligodendrocyte of cerebellum		Golgi neurons of cerebellum		UPBCs and Bergman glia of cerebellum		Stellate and basket cells of cerebellum		Granule cells of cerebellum		Purkinje cells of cerebellum		Bergman glia and mature oligod. of cereb.		Cholin. neurons of striatum		D1+ MSNs of striatum		D2+ MSNs of striatum		Astrocytes of cortex		Oligodendrocyte of cortex		Cort+ neurons of cortex		Immune cells		Glt25d2 neurons of cortex
pSI = 0.0001	P-value	Bonf. Adj.	P-value	Bonf. Adj.	P-value	Bonf. Adj.	P-value	Bonf. Adj.	P-value	Bonf. Adj.	P-value	Bonf. Adj.	P-value	Bonf. Adj.	P-value	Bonf. Adj.	P-value	Bonf. Adj.	P-value	Bonf. Adj.	P-value	Bonf. Adj.	P-value	Bonf. Adj.	P-value	Bonf. Adj.	P-value	Bonf. Adj.	P-value	Bonf. Adj.	P-value	Bonf. Adj.	P-value	Bonf. Adj.	P-value	Bonf. Adj.	P-value	Bonf. Adj.	P-value	Bonf. Adj.	P-value	Bonf. Adj.	P-value	Bonf. Adj.	P-value	Bonf. Adj.	P-value	Bonf. Adj.	P-value
MEblack	1	1	1	1	1	1	1	1	1	1	1	1	1	1	1	1	0.314103	1	1	1	1	1	1	1	1	1	1	1	1	1	1	1	1	1	1	1	1	1	1	1	1	1	1	1	1	1	1	1	1
MEblue	1	1	0.229126	1	1	1	0.000589173	0.0636307	1	1	0.115113	1	1	1	0.226935	1	1	1	0.0318378	1	0.415741	1	0.320918	1	1	1	0.202054	1	0.336213	1	0.132478	1	0.126368	1	0.517566	1	1	1	1	1	0.40818	1	0.827431	1	1	1	1	1	1
MEbrown	1	1	1	1	1	1	1	1	1	1	1	1	1	1	0.38051	1	1	1	1	1	0.25709	1	1	1	0.520993	1	0.71021	1	1	1	0.945957	1	0.841568	1	1	1	1	1	1	1	0.14644	1	0.0408509	1	1	1	0.71021	1	1
MEcyan	1	1	1	1	1	1	1	1	1	1	1	1	1	1	1	1	1	1	1	1	1	1	1	1	1	1	1	1	1	1	1	1	1	1	1	1	1	1	1	1	1	1	1	1	1	1	1	1	1
MEgreen	1	1	1	1	1	1	1	1	1	1	0.400653	1	1	1	1	1	1	1	0.0430198	1	0.744797	1	1	1	1	1	0.613833	1	1	1	0.893707	1	0.0504159	1	1	1	1	1	1	1	3.78375e-07	0.00018389	0.862365	1	1	1	1	1	1
MEgreenyellow	1	1	1	1	1	1	1	1	1	1	1	1	1	1	1	1	1	1	1	1	1	1	1	1	1	1	1	1	1	1	1	1	1	1	1	1	1	1	1	1	1	1	1	1	1	1	1	1	1
MEgrey	1	1	0.864792	1	0.570669	1	0.880582	1	0.999578	1	0.9909	1	0.410572	1	0.82633	1	0.768559	1	0.99552	1	1	1	0.873212	1	0.934268	1	0.952763	1	0.999935	1	0.994755	1	0.827454	1	0.997434	1	0.999315	1	0.99978	1	0.994526	1	1	1	0.864284	1	0.843493	1	0.936486
MEmagenta	1	1	1	1	1	1	1	1	1	1	1	1	1	1	1	1	1	1	1	1	1	1	1	1	1	1	1	1	1	1	0.587038	1	1	1	1	1	1	1	1	1	1	1	1	1	1	1	1	1	1
MEpink	1	1	1	1	1	1	1	1	1	1	1	1	1	1	1	1	1	1	1	1	1	1	1	1	1	1	1	1	1	1	1	1	1	1	1	1	1	1	1	1	0.55907	1	1	1	1	1	1	1	1
MEpurple	1	1	1	1	1	1	1	1	1	1	0.146866	1	1	1	1	1	1	1	1	1	1	1	1	1	1	1	1	1	1	1	1	1	1	1	1	1	1	1	0.207234	1	0.362659	1	1	1	0.0425672	1	0.00237436	1	1
MEred	1	1	1	1	1	1	1	1	1	1	1	1	1	1	0.157217	1	1	1	0.425128	1	2.28573e-45	1.11087e-42	1	1	1	1	1	1	0.274788	1	0.789231	1	0.625852	1	0.435315	1	1	1	1	1	1	1	8.69283e-47	4.22471e-44	1	1	1	1	1
MEsalmon	1	1	1	1	1	1	1	1	1	1	1	1	1	1	1	1	1	1	1	1	1	1	1	1	1	1	1	1	1	1	1	1	1	1	1	1	1	1	1	1	1	1	1	1	1	1	1	1	1
MEtan	1	1	1	1	1	1	1	1	1	1	1	1	1	1	1	1	1	1	0.112465	1	1	1	1	1	1	1	1	1	1	1	1	1	0.190927	1	1	1	1	1	1	1	0.212502	1	1	1	1	1	1	1	1
MEturquoise	1	1	0.99814	1	1	1	1	1	2.2052e-11	2.38162e-09	0.891582	1	0.914551	1	0.988617	1	0.931688	1	1	1	0.999885	1	1	1	1	1	0.914185	1	0.581488	1	0.713158	1	1	1	0.442489	1	8.21072e-05	0.0399041	2.58555e-08	1.25658e-05	1	1	1	1	0.488514	1	1	1	1
MEyellow	1	1	1	1	1	1	1	1	1	1	1	1	1	1	1	1	1	1	1	1	0.961425	1	1	1	1	1	1	1	1	1	1	1	1	1	0.631686	1	1	1	1	1	1	1	0.909965	1	1	1	1	1	1
Moudule	Amygdala		Cerebellum		Cortex		Hippocampus		Striatum		Thalamus		Cholin. neurons of basal forebrain		Cholin. neurons of brain stem		Seroton. neurons of brain stem		Astroglia of cerebellum		Oligodendrocyte of cerebellum		Golgi neurons of cerebellum		UPBCs and Bergman glia of cerebellum		Stellate and basket cells of cerebellum		Granule cells of cerebellum		Purkinje cells of cerebellum		Bergman glia and mature oligod. of cereb.		Cholin. neurons of striatum		D1+ MSNs of striatum		D2+ MSNs of striatum		Astrocytes of cortex		Oligodendrocyte of cortex		Cort+ neurons of cortex		Immune cells		Glt25d2 neurons of cortex
pSI = 0.001	P-value	Bonf. Adj.	P-value	Bonf. Adj.	P-value	Bonf. Adj.	P-value	Bonf. Adj.	P-value	Bonf. Adj.	P-value	Bonf. Adj.	P-value	Bonf. Adj.	P-value	Bonf. Adj.	P-value	Bonf. Adj.	P-value	Bonf. Adj.	P-value	Bonf. Adj.	P-value	Bonf. Adj.	P-value	Bonf. Adj.	P-value	Bonf. Adj.	P-value	Bonf. Adj.	P-value	Bonf. Adj.	P-value	Bonf. Adj.	P-value	Bonf. Adj.	P-value	Bonf. Adj.	P-value	Bonf. Adj.	P-value	Bonf. Adj.	P-value	Bonf. Adj.	P-value	Bonf. Adj.	P-value	Bonf. Adj.	P-value
MEblack	1	1	1	1	1	1	1	1	1	1	1	1	1	1	1	1	0.404641	1	1	1	1	1	1	1	1	1	1	1	1	1	1	1	1	1	1	1	1	1	0.640382	1	1	1	1	1	1	1	1	1	1
MEblue	0.0502261	1	0.0729682	1	1	1	3.09684e-08	3.34459e-06	1	1	0.183024	1	0.607115	1	0.469448	1	1	1	0.0357076	1	0.757709	1	0.549473	1	1	1	0.310595	1	0.23528	1	0.0364002	1	0.225551	1	0.641397	1	1	1	1	1	0.421755	1	0.598772	1	0.320918	1	0.431579	1	1
MEbrown	1	1	0.986956	1	1	1	0.772982	1	1	1	1	1	0.746581	1	0.080046	1	0.668632	1	1	1	0.000665587	0.323475	1	1	0.729004	1	0.492906	1	0.746581	1	0.974241	1	0.14504	1	0.778397	1	1	1	1	1	0.131929	1	0.0018656	0.90668	1	1	0.886761	1	0.352595
MEcyan	1	1	1	1	1	1	1	1	1	1	1	1	1	1	1	1	1	1	1	1	1	1	1	1	1	1	1	1	1	1	1	1	1	1	1	1	1	1	1	1	1	1	1	1	1	1	1	1	1
MEgreen	1	1	0.612363	1	1	1	1	1	1	1	0.725354	1	1	1	0.835094	1	1	1	0.000203725	0.0990102	0.824688	1	1	1	1	1	0.723745	1	0.651637	1	0.939841	1	5.62752e-07	0.000273498	1	1	1	1	1	1	1.45263e-11	7.05979e-09	0.459449	1	1	1	0.812377	1	1
MEgreenyellow	1	1	1	1	1	1	1	1	1	1	1	1	1	1	1	1	1	1	1	1	0.615883	1	1	1	1	1	1	1	1	1	0.44814	1	1	1	1	1	1	1	1	1	1	1	1	1	1	1	1	1	1
MEgrey	1	1	0.375019	1	0.119645	1	0.985458	1	0.999987	1	0.508062	1	0.439643	1	0.973441	1	0.890634	1	0.987621	1	1	1	0.900888	1	0.771881	1	0.996001	1	0.998713	1	0.970989	1	0.994774	1	0.983913	1	1	1	0.999996	1	0.999841	1	1	1	0.995378	1	0.830446	1	0.842017
MEmagenta	1	1	1	1	1	1	1	1	1	1	1	1	1	1	1	1	1	1	1	1	1	1	1	1	1	1	1	1	1	1	0.670101	1	1	1	1	1	1	1	1	1	1	1	1	1	1	1	1	1	1
MEpink	1	1	1	1	1	1	1	1	1	1	1	1	1	1	1	1	1	1	1	1	1	1	1	1	1	1	1	1	1	1	1	1	1	1	1	1	1	1	1	1	0.400694	1	1	1	1	1	1	1	1
MEpurple	1	1	0.628835	1	1	1	1	1	1	1	0.0604215	1	1	1	1	1	1	1	1	1	1	1	1	1	1	1	1	1	1	1	1	1	1	1	1	1	1	1	0.376434	1	0.53425	1	1	1	0.116002	1	0.0115436	1	1
MEred	1	1	0.879812	1	1	1	1	1	1	1	0.575627	1	1	1	0.351879	1	1	1	0.765261	1	2.97605e-59	1.44636e-56	1	1	1	1	0.590804	1	0.163457	1	0.85806	1	0.572256	1	0.552488	1	1	1	1	1	0.847474	1	5.34844e-55	2.59934e-52	1	1	1	1	1
MEsalmon	1	1	1	1	1	1	1	1	1	1	1	1	1	1	1	1	1	1	1	1	1	1	1	1	1	1	1	1	1	1	1	1	1	1	1	1	1	1	1	1	1	1	1	1	1	1	1	1	1
MEtan	1	1	1	1	1	1	0.160438	1	1	1	1	1	1	1	1	1	1	1	0.268259	1	1	1	1	1	1	1	1	1	1	1	1	1	0.34089	1	1	1	1	1	1	1	0.0613699	1	1	1	1	1	1	1	1
MEturquoise	1	1	0.98124	1	0.296424	1	0.991237	1	4.38098e-28	4.73146e-26	0.793264	1	0.989824	1	0.982933	1	0.975062	1	0.999886	1	0.999995	1	0.897372	1	0.987267	1	0.789037	1	0.823072	1	0.90136	1	0.999995	1	0.338682	1	5.76429e-12	2.80145e-09	5.87304e-17	2.8543e-14	1	1	1	1	0.549672	1	0.973764	1	0.406428
MEyellow	1	1	1	1	1	1	1	1	1	1	1	1	1	1	0.887871	1	1	1	1	1	0.972749	1	1	1	1	1	0.790228	1	1	1	0.967035	1	1	1	0.754704	1	1	1	1	1	1	1	0.796463	1	1	1	1	1	1
Moudule	Amygdala		Cerebellum		Cortex		Hippocampus		Striatum		Thalamus		Cholin. neurons of basal forebrain		Cholin. neurons of brain stem		Seroton. neurons of brain stem		Astroglia of cerebellum		Oligodendrocyte of cerebellum		Golgi neurons of cerebellum		UPBCs and Bergman glia of cerebellum		Stellate and basket cells of cerebellum		Granule cells of cerebellum		Purkinje cells of cerebellum		Bergman glia and mature oligod. of cereb.		Cholin. neurons of striatum		D1+ MSNs of striatum		D2+ MSNs of striatum		Astrocytes of cortex		Oligodendrocyte of cortex		Cort+ neurons of cortex		Immune cells		Glt25d2 neurons of cortex
pSI = 0.01	P-value	Bonf. Adj.	P-value	Bonf. Adj.	P-value	Bonf. Adj.	P-value	Bonf. Adj.	P-value	Bonf. Adj.	P-value	Bonf. Adj.	P-value	Bonf. Adj.	P-value	Bonf. Adj.	P-value	Bonf. Adj.	P-value	Bonf. Adj.	P-value	Bonf. Adj.	P-value	Bonf. Adj.	P-value	Bonf. Adj.	P-value	Bonf. Adj.	P-value	Bonf. Adj.	P-value	Bonf. Adj.	P-value	Bonf. Adj.	P-value	Bonf. Adj.	P-value	Bonf. Adj.	P-value	Bonf. Adj.	P-value	Bonf. Adj.	P-value	Bonf. Adj.	P-value	Bonf. Adj.	P-value	Bonf. Adj.	P-value
MEblack	1	1	1	1	1	1	1	1	1	1	1	1	0.75766	1	1	1	0.58555	1	1	1	1	1	1	1	1	1	1	1	0.883006	1	1	1	1	1	1	1	0.934992	1	0.483875	1	1	1	1	1	1	1	1	1	0.65155
MEblue	0.098714	1	0.286296	1	0.986408	1	5.66422e-37	6.11736e-35	0.930934	1	0.137387	1	0.871857	1	0.111752	1	0.721061	1	0.328555	1	0.87658	1	0.342379	1	0.299153	1	0.206599	1	0.593792	1	0.126887	1	0.427108	1	0.201936	1	0.980975	1	0.89311	1	0.0667442	1	0.680749	1	0.360067	1	0.66859	1	0.446903
MEbrown	0.470021	1	0.966938	1	0.993532	1	0.953734	1	1	1	0.52979	1	0.951147	1	0.0223568	1	0.846799	1	0.0178068	1	1.98624e-06	0.000965311	0.586903	1	0.774066	1	0.860856	1	0.829292	1	0.998093	1	1.98568e-07	9.6504e-05	0.857176	1	1	1	1	1	0.00302541	1	2.49487e-07	0.000121251	1	1	0.128355	1	0.65172
MEcyan	1	1	1	1	1	1	1	1	1	1	1	1	1	1	1	1	1	1	1	1	1	1	1	1	1	1	1	1	1	1	1	1	1	1	1	1	1	1	1	1	1	1	1	1	1	1	1	1	1
MEgreen	0.373353	1	0.884572	1	0.975538	1	0.972009	1	0.382806	1	0.525398	1	1	1	0.976953	1	1	1	6.24499e-24	3.03506e-21	0.145267	1	0.906598	1	0.169217	1	0.744797	1	0.863308	1	0.951886	1	1.64986e-18	8.01832e-16	0.929731	1	0.988577	1	0.986647	1	5.54753e-29	2.6961e-26	0.362036	1	1	1	0.189197	1	0.821816
MEgreenyellow	1	1	1	1	1	1	1	1	1	1	1	1	0.387671	1	1	1	1	1	0.744685	1	0.841638	1	1	1	1	1	1	1	0.524065	1	0.638458	1	1	1	0.42971	1	1	1	1	1	1	1	0.810769	1	1	1	1	1	1
MEgrey	0.394836	1	3.64101e-07	3.93229e-05	0.0407887	1	0.956181	1	0.996118	1	0.000260685	0.028154	0.714033	1	0.98706	1	0.950512	1	1	1	1	1	0.999995	1	0.923854	1	0.99812	1	0.999733	1	0.985558	1	1	1	0.997325	1	1	1	1	1	1	1	1	1	0.950512	1	0.931845	1	0.99938
MEmagenta	1	1	1	1	1	1	1	1	1	1	1	1	1	1	1	1	1	1	1	1	1	1	1	1	1	1	1	1	1	1	0.850122	1	1	1	1	1	1	1	1	1	1	1	1	1	1	1	1	1	1
MEpink	1	1	1	1	1	1	1	1	1	1	0.96013	1	0.695762	1	1	1	1	1	0.963567	1	0.642678	1	1	1	1	1	1	1	0.534018	1	1	1	1	1	0.743981	1	1	1	1	1	0.79504	1	0.982385	1	1	1	1	1	1
MEpurple	1	1	0.391567	1	1	1	1	1	0.46433	1	0.544549	1	0.137781	1	1	1	1	1	0.539778	1	0.700773	1	1	1	1	1	1	1	1	1	1	1	1	1	0.527395	1	0.356067	1	0.704228	1	0.483195	1	1	1	0.3342	1	0.000805781	0.39161	0.385453
MEred	1	1	0.808973	1	1	1	1	1	0.426032	1	0.901623	1	0.800285	1	0.258575	1	1	1	0.988712	1	1.0329e-81	5.0199e-79	1	1	1	1	0.551718	1	0.0935927	1	0.964612	1	0.593255	1	0.841889	1	1	1	1	1	0.909314	1	2.14675e-78	1.04332e-75	1	1	1	1	1
MEsalmon	1	1	0.65156	1	1	1	1	1	1	1	1	1	1	1	1	1	1	1	1	1	1	1	1	1	1	1	1	1	1	1	0.381053	1	1	1	1	1	1	1	1	1	1	1	1	1	1	1	1	1	1
MEtan	1	1	0.491062	1	1	1	0.436122	1	0.00865099	0.934307	1	1	0.293301	1	1	1	1	1	0.0701793	1	1	1	1	1	0.279494	1	0.330594	1	1	1	1	1	0.0120786	1	1	1	0.487989	1	0.475885	1	1.95917e-06	0.000952158	1	1	1	1	0.444386	1	0.027232
MEturquoise	1	1	0.422072	1	2.53438e-10	2.73713e-08	0.983418	1	5.46515e-33	5.90236e-31	0.133011	1	0.924417	1	0.78259	1	0.944462	1	1	1	1	1	0.263654	1	0.995511	1	0.206602	1	0.58346	1	0.242458	1	1	1	0.29148	1	8.31352e-30	4.04037e-27	1.14077e-27	5.54413e-25	1	1	1	1	0.379765	1	0.984015	1	1.16634e-05
MEyellow	1	1	0.99997	1	1	1	1	1	1	1	0.999422	1	1	1	0.941625	1	1	1	1	1	0.893441	1	1	1	1	1	0.833358	1	0.985906	1	0.928189	1	0.994414	1	0.960193	1	1	1	1	1	0.970242	1	0.22225	1	1	1	0.991488	1	1
[truncated: 17 more columns]
