# Supplementary material for: Comprehensive transcriptomic analysis indicates brain regional specific alterations in type 2 diabetes
Source: Aging (Albany NY). 2019 Aug 26;11(16):6398–421. doi: 10.18632/aging.102196 (PMC6738403; doi:10.18632/aging.102196)
Supplement: Supplementary Table 7 [file aging-11-102196-s001.xlsx]

## Sheet: Sheet1
Supplementary Table 7. Enrichment of regional and cell-type markers in hippocampus modules at various specificity indices
Three tables corresponds to three different pSIs
Abbreviations: pSI, specificity index; Bonf. Adj., Bonferroni-adjusted P-values
Moudule	Amygdala		Cerebellum		Cortex		Hippocampus		Striatum		Thalamus		Cholin. neurons of basal forebrain		Cholin. neurons of brain stem		Seroton. neurons of brain stem		Astroglia of cerebellum		Oligodendrocyte of cerebellum		Golgi neurons of cerebellum		UPBCs and Bergman glia of cerebellum		Stellate and basket cells of cerebellum		Granule cells of cerebellum		Purkinje cells of cerebellum		Bergman glia and mature oligod. of cereb.		Cholin. neurons of striatum		D1+ MSNs of striatum		D2+ MSNs of striatum		Astrocytes of cortex		Oligodendrocyte of cortex		Cort+ neurons of cortex		Immune cells		Glt25d2 neurons of cortex
pSI = 0.0001	P-value	Bonf. Adj.	P-value	Bonf. Adj.	P-value	Bonf. Adj.	P-value	Bonf. Adj.	P-value	Bonf. Adj.	P-value	Bonf. Adj.	P-value	Bonf. Adj.	P-value	Bonf. Adj.	P-value	Bonf. Adj.	P-value	Bonf. Adj.	P-value	Bonf. Adj.	P-value	Bonf. Adj.	P-value	Bonf. Adj.	P-value	Bonf. Adj.	P-value	Bonf. Adj.	P-value	Bonf. Adj.	P-value	Bonf. Adj.	P-value	Bonf. Adj.	P-value	Bonf. Adj.	P-value	Bonf. Adj.	P-value	Bonf. Adj.	P-value	Bonf. Adj.	P-value	Bonf. Adj.	P-value	Bonf. Adj.	P-value
MEblack	1	1	1	1	1	1	1	1	1	1	1	1	1	1	1	1	1	1	1	1	6.14976e-42	7.30592e-39	1	1	1	1	1	1	1	1	0.657108	1	1	1	0.324881	1	1	1	1	1	1	1	2.98889e-38	3.5508e-35	1	1	1	1	1
MEblue	1	1	1	1	1	1	1	1	1	1	1	1	1	1	1	1	1	1	1	1	0.826321	1	1	1	1	1	1	1	1	1	0.768563	1	1	1	1	1	1	1	1	1	1	1	0.726032	1	1	1	1	1	1
MEbrown	1	1	1	1	1	1	1	1	1	1	1	1	1	1	1	1	0.352091	1	1	1	1	1	1	1	1	1	1	1	1	1	1	1	1	1	1	1	1	1	1	1	1	1	1	1	1	1	1	1	1
MEcyan	1	1	1	1	1	1	1	1	1	1	1	1	1	1	1	1	1	1	1	1	1	1	1	1	1	1	1	1	1	1	1	1	1	1	1	1	1	1	1	1	1	1	0.467411	1	1	1	1	1	1
MEdarkgreen	1	1	1	1	1	1	1	1	0.0707755	1	0.00351184	0.927125	0.094811	1	0.165761	1	1	1	1	1	1	1	0.0740713	1	1	1	1	1	1	1	1	1	1	1	1	1	1	1	1	1	1	1	1	1	1	1	1	1	1
MEdarkgrey	1	1	1	1	1	1	1	1	1	1	1	1	1	1	1	1	1	1	1	1	1	1	1	1	1	1	1	1	1	1	0.000759905	0.902768	0.02795	1	0.141191	1	1	1	1	1	1	1	0.307105	1	1	1	0.161403	1	1
MEdarkmagenta	1	1	1	1	1	1	1	1	1	1	1	1	1	1	1	1	1	1	1	1	1	1	1	1	1	1	1	1	1	1	1	1	1	1	1	1	0.0476694	1	1	1	1	1	1	1	1	1	0.0725687	1	1
MEdarkolivegreen	1	1	1	1	1	1	0.00113034	0.298409	0.0580772	1	1	1	1	1	1	1	1	1	1	1	1	1	1	1	1	1	1	1	1	1	1	1	1	1	1	1	1	1	0.102953	1	1	1	1	1	1	1	1	1	1
MEdarkorange	1	1	1	1	1	1	1	1	1	1	1	1	1	1	1	1	1	1	1	1	1	1	1	1	1	1	1	1	1	1	0.270771	1	1	1	1	1	1	1	1	1	1	1	1	1	1	1	1	1	1
MEdarkred	1	1	1	1	1	1	1	1	1	1	1	1	1	1	1	1	1	1	1	1	1	1	1	1	1	1	1	1	1	1	0.31278	1	1	1	1	1	1	1	1	1	1	1	1	1	1	1	1	1	1
MEdarkturquoise	1	1	1	1	1	1	1	1	1	1	1	1	1	1	1	1	1	1	1	1	1	1	1	1	1	1	1	1	1	1	1	1	1	1	1	1	1	1	1	1	1	1	1	1	1	1	1	1	1
MEgreen	1	1	0.554314	1	1	1	1	1	1	1	0.248436	1	1	1	0.413726	1	1	1	1	1	0.751348	1	1	1	1	1	0.389737	1	0.213439	1	1	1	0.520315	1	1	1	1	1	0.347566	1	1	1	1	1	0.0768764	1	3.27829e-11	3.89461e-08	1
MEgreenyellow	1	1	1	1	1	1	1	1	1	1	1	1	1	1	1	1	1	1	1	1	1	1	1	1	1	1	1	1	1	1	1	1	1	1	1	1	1	1	1	1	1	1	1	1	1	1	1	1	1
MEgrey	1	1	0.987684	1	0.558016	1	0.348673	1	0.997463	1	0.928323	1	0.940434	1	0.640458	1	0.946082	1	0.989621	1	1	1	0.952642	1	0.976452	1	0.858385	1	0.991812	1	0.977656	1	0.982757	1	0.997876	1	0.978153	1	0.0637412	1	0.999152	1	1	1	0.624375	1	0.999995	1	0.939525
MEgrey60	1	1	1	1	1	1	1	1	1	1	1	1	1	1	1	1	1	1	1	1	1	1	1	1	1	1	1	1	1	1	1	1	1	1	1	1	1	1	0.203375	1	1	1	1	1	1	1	1	1	1
MElightcyan	1	1	1	1	1	1	1	1	1	1	1	1	1	1	1	1	1	1	0.149155	1	0.419226	1	0.084726	1	1	1	0.17538	1	1	1	0.365093	1	1	1	1	1	1	1	1	1	1	1	1	1	1	1	1	1	1
MElightgreen	1	1	1	1	1	1	1	1	1	1	1	1	1	1	1	1	1	1	1	1	1	1	1	1	1	1	1	1	1	1	1	1	1	1	1	1	1	1	1	1	1	1	1	1	1	1	1	1	1
MElightyellow	1	1	1	1	1	1	1	1	1	1	1	1	1	1	1	1	1	1	1	1	1	1	1	1	1	1	1	1	1	1	1	1	1	1	1	1	1	1	1	1	0.283108	1	1	1	1	1	1	1	1
MEmagenta	1	1	1	1	1	1	1	1	1	1	1	1	1	1	1	1	1	1	1	1	0.337003	1	1	1	1	1	1	1	1	1	0.635974	1	1	1	1	1	1	1	1	1	1	1	0.590999	1	1	1	1	1	1
MEmediumpurple3	1	1	1	1	1	1	1	1	1	1	1	1	1	1	1	1	1	1	0.0633497	1	0.197614	1	1	1	1	1	1	1	1	1	1	1	0.00593123	1	1	1	1	1	1	1	1	1	0.150273	1	1	1	1	1	1
MEmidnightblue	1	1	1	1	1	1	1	1	1	1	1	1	1	1	1	1	1	1	1	1	1	1	1	1	1	1	1	1	1	1	1	1	1	1	1	1	1	1	1	1	1	1	1	1	1	1	1	1	1
MEorange	1	1	1	1	1	1	1	1	1	1	1	1	1	1	1	1	1	1	1	1	1	1	1	1	1	1	1	1	1	1	1	1	1	1	1	1	1	1	1	1	1	1	1	1	1	1	1	1	1
MEorangered4	1	1	1	1	1	1	1	1	0.0365471	1	1	1	1	1	1	1	0.0459434	1	1	1	1	1	1	1	1	1	1	1	1	1	1	1	1	1	1	1	0.0459434	1	1	1	1	1	1	1	1	1	1	1	1
MEpaleturquoise	1	1	1	1	1	1	1	1	1	1	1	1	1	1	1	1	1	1	1	1	0.341069	1	1	1	1	1	1	1	1	1	1	1	1	1	1	1	1	1	1	1	0.21986	1	0.265471	1	1	1	1	1	1
MEpink	1	1	1	1	1	1	1	1	1	1	1	1	1	1	1	1	1	1	1	1	1	1	1	1	1	1	1	1	1	1	1	1	1	1	1	1	1	1	1	1	1	1	1	1	1	1	1	1	1
MEplum1	1	1	1	1	1	1	1	1	1	1	1	1	1	1	1	1	1	1	1	1	1	1	1	1	1	1	1	1	1	1	1	1	1	1	1	1	1	1	1	1	1	1	1	1	1	1	1	1	1
MEpurple	1	1	0.441098	1	1	1	1	1	1	1	1	1	1	1	1	1	1	1	1	1	1	1	1	1	0.209276	1	1	1	1	1	1	1	1	1	1	1	0.225991	1	1	1	1	1	1	1	1	1	1	1	1
MEred	1	1	1	1	1	1	1	1	0.201989	1	1	1	1	1	0.40106	1	1	1	1	1	0.382213	1	1	1	0.245526	1	1	1	1	1	1	1	0.506	1	1	1	1	1	1	1	0.0442571	1	0.256428	1	1	1	1	1	1
MEroyalblue	1	1	1	1	1	1	1	1	1	1	1	1	1	1	1	1	1	1	1	1	1	1	1	1	1	1	1	1	1	1	1	1	1	1	1	1	1	1	1	1	1	1	1	1	1	1	1	1	1
MEsaddlebrown	1	1	1	1	1	1	1	1	1	1	1	1	1	1	1	1	0.000127586	0.151572	1	1	1	1	1	1	1	1	0.142407	1	1	1	1	1	0.204288	1	1	1	0.0948008	1	1	1	1	1	1	1	1	1	0.142407	1	1
MEsalmon	1	1	1	1	1	1	1	1	1	1	1	1	1	1	1	1	1	1	1	1	1	1	1	1	1	1	1	1	1	1	1	1	1	1	0.241155	1	1	1	1	1	1	1	1	1	1	1	1	1	1
MEsienna3	1	1	1	1	1	1	1	1	1	1	1	1	1	1	1	1	1	1	0.0434232	1	1	1	1	1	1	1	1	1	1	1	1	1	1	1	1	1	1	1	1	1	1	1	1	1	1	1	1	1	1
MEskyblue	1	1	1	1	1	1	1	1	1	1	1	1	1	1	1	1	1	1	1	1	0.314572	1	1	1	1	1	1	1	1	1	1	1	1	1	1	1	1	1	1	1	1	1	0.0314689	1	1	1	1	1	1
MEskyblue3	1	1	1	1	1	1	1	1	1	1	1	1	1	1	1	1	1	1	1	1	1	1	1	1	1	1	1	1	1	1	1	1	1	1	1	1	1	1	1	1	1	1	1	1	1	1	1	1	1
MEsteelblue	1	1	1	1	1	1	1	1	1	1	1	1	1	1	1	1	1	1	1	1	1	1	1	1	1	1	1	1	1	1	1	1	1	1	1	1	1	1	1	1	1	1	1	1	1	1	1	1	1
MEtan	1	1	1	1	1	1	1	1	1	1	1	1	1	1	1	1	1	1	1	1	1	1	1	1	1	1	1	1	1	1	1	1	1	1	1	1	1	1	1	1	1	1	1	1	1	1	1	1	1
MEturquoise	1	1	1	1	1	1	1	1	1	1	0.375056	1	1	1	1	1	1	1	0.0334859	1	0.911408	1	1	1	1	1	0.208173	1	1	1	1	1	0.00839159	1	1	1	0.104126	1	1	1	4.21335e-13	5.00546e-10	0.530576	1	1	1	1	1	1
MEviolet	1	1	1	1	1	1	1	1	1	1	1	1	1	1	1	1	1	1	1	1	1	1	1	1	1	1	1	1	1	1	1	1	1	1	1	1	1	1	1	1	1	1	1	1	1	1	1	1	1
MEwhite	1	1	1	1	1	1	1	1	1	1	1	1	1	1	1	1	1	1	1	1	1	1	1	1	1	1	1	1	1	1	1	1	1	1	1	1	1	1	1	1	1	1	1	1	1	1	1	1	1
MEyellow	1	1	1	1	1	1	1	1	1	1	1	1	1	1	1	1	1	1	1	1	0.813379	1	1	1	1	1	1	1	1	1	1	1	1	1	1	1	1	1	1	1	1	1	1	1	1	1	1	1	1
MEyellowgreen	1	1	1	1	1	1	1	1	1	1	1	1	1	1	1	1	1	1	1	1	1	1	1	1	1	1	1	1	1	1	1	1	1	1	1	1	1	1	1	1	1	1	1	1	1	1	1	1	1
Moudule	Amygdala		Cerebellum		Cortex		Hippocampus		Striatum		Thalamus		Cholin. neurons of basal forebrain		Cholin. neurons of brain stem		Seroton. neurons of brain stem		Astroglia of cerebellum		Oligodendrocyte of cerebellum		Golgi neurons of cerebellum		UPBCs and Bergman glia of cerebellum		Stellate and basket cells of cerebellum		Granule cells of cerebellum		Purkinje cells of cerebellum		Bergman glia and mature oligod. of cereb.		Cholin. neurons of striatum		D1+ MSNs of striatum		D2+ MSNs of striatum		Astrocytes of cortex		Oligodendrocyte of cortex		Cort+ neurons of cortex		Immune cells		Glt25d2 neurons of cortex
pSI = 0.001	P-value	Bonf. Adj.	P-value	Bonf. Adj.	P-value	Bonf. Adj.	P-value	Bonf. Adj.	P-value	Bonf. Adj.	P-value	Bonf. Adj.	P-value	Bonf. Adj.	P-value	Bonf. Adj.	P-value	Bonf. Adj.	P-value	Bonf. Adj.	P-value	Bonf. Adj.	P-value	Bonf. Adj.	P-value	Bonf. Adj.	P-value	Bonf. Adj.	P-value	Bonf. Adj.	P-value	Bonf. Adj.	P-value	Bonf. Adj.	P-value	Bonf. Adj.	P-value	Bonf. Adj.	P-value	Bonf. Adj.	P-value	Bonf. Adj.	P-value	Bonf. Adj.	P-value	Bonf. Adj.	P-value	Bonf. Adj.	P-value
MEblack	1	1	0.77639	1	1	1	1	1	1	1	1	1	1	1	1	1	1	1	1	1	1.33745e-59	1.58889e-56	1	1	1	1	0.458966	1	1	1	0.73871	1	0.735459	1	0.424629	1	1	1	1	1	1	1	1.72796e-43	2.05282e-40	1	1	1	1	1
MEblue	1	1	1	1	1	1	1	1	1	1	1	1	1	1	1	1	1	1	1	1	0.947851	1	1	1	1	1	1	1	1	1	0.840396	1	1	1	1	1	1	1	1	1	1	1	0.900631	1	1	1	1	1	1
MEbrown	1	1	1	1	1	1	1	1	1	1	1	1	1	1	1	1	0.449518	1	1	1	1	1	1	1	1	1	1	1	1	1	1	1	1	1	1	1	1	1	1	1	1	1	1	1	1	1	1	1	1
MEcyan	1	1	1	1	1	1	1	1	1	1	1	1	1	1	1	1	1	1	1	1	1	1	1	1	1	1	1	1	1	1	1	1	1	1	1	1	1	1	1	1	1	1	0.674853	1	1	1	1	1	1
MEdarkgreen	1	1	0.105187	1	0.109472	1	1	1	0.231332	1	0.0210463	1	0.0146761	1	0.0397772	1	1	1	1	1	1	1	0.14662	1	0.161967	1	1	1	1	1	1	1	1	1	0.184479	1	1	1	1	1	1	1	1	1	1	1	1	1	1
MEdarkgrey	1	1	1	1	1	1	1	1	1	1	1	1	1	1	0.283542	1	1	1	0.320225	1	1	1	1	1	1	1	1	1	1	1	0.000162839	0.193452	0.0928523	1	0.192772	1	0.230363	1	1	1	1	1	0.480164	1	1	1	0.00359596	1	1
MEdarkmagenta	1	1	0.232175	1	0.00137735	0.36362	0.0863195	1	0.117812	1	0.10137	1	1	1	1	1	1	1	1	1	1	1	0.0687793	1	1	1	1	1	1	1	1	1	1	1	1	1	0.106012	1	0.124087	1	1	1	1	1	1	1	0.124087	1	1
MEdarkolivegreen	1	1	0.363634	1	1	1	0.010368	1	0.193013	1	0.167113	1	1	1	1	1	1	1	1	1	0.449755	1	1	1	1	1	1	1	1	1	1	1	1	1	1	1	1	1	0.00136785	1	1	1	0.373118	1	1	1	1	1	1
MEdarkorange	1	1	0.0893554	1	1	1	1	1	1	1	1	1	1	1	1	1	1	1	0.254666	1	1	1	1	1	1	1	1	1	1	1	0.0588878	1	1	1	1	1	0.180762	1	1	1	1	1	1	1	1	1	1	1	1
MEdarkred	1	1	0.468188	1	1	1	1	1	1	1	1	1	1	1	1	1	1	1	1	1	1	1	1	1	1	1	0.193679	1	1	1	0.375214	1	1	1	1	1	1	1	1	1	1	1	1	1	1	1	1	1	1
MEdarkturquoise	1	1	0.385011	1	1	1	0.153053	1	1	1	1	1	1	1	1	1	1	1	1	1	1	1	1	1	1	1	1	1	1	1	1	1	1	1	1	1	1	1	1	1	1	1	1	1	1	1	1	1	1
MEgreen	1	1	0.528636	1	1	1	0.456063	1	1	1	0.160329	1	1	1	0.607615	1	1	1	1	1	0.904456	1	1	1	1	1	0.487121	1	0.421513	1	1	1	0.420056	1	1	1	1	1	0.212678	1	1	1	1	1	0.202871	1	7.72298e-10	9.1749e-07	1
MEgreenyellow	1	1	1	1	1	1	1	1	1	1	1	1	1	1	1	1	1	1	1	1	1	1	1	1	1	1	1	1	1	1	1	1	1	1	1	1	1	1	1	1	1	1	1	1	1	1	1	1	1
MEgrey	0.845255	1	0.960024	1	0.106648	1	0.133742	1	0.290025	1	0.839392	1	0.966177	1	0.902334	1	0.990364	1	0.99973	1	1	1	0.991071	1	0.982333	1	0.969534	1	0.966177	1	0.922138	1	0.999431	1	0.986569	1	0.846626	1	0.151365	1	0.999997	1	1	1	0.984496	1	0.999926	1	0.685729
MEgrey60	1	1	1	1	1	1	0.0386495	1	1	1	1	1	1	1	1	1	1	1	0.438197	1	1	1	1	1	1	1	1	1	1	1	1	1	1	1	1	1	0.323711	1	0.0109046	1	1	1	1	1	0.11372	1	1	1	0.0881716
MElightcyan	1	1	0.536229	1	1	1	1	1	0.305497	1	1	1	1	1	1	1	1	1	0.344824	1	0.600219	1	0.166728	1	1	1	0.229498	1	1	1	0.109833	1	1	1	1	1	1	1	1	1	1	1	0.511646	1	1	1	1	1	1
MElightgreen	1	1	1	1	1	1	1	1	1	1	1	1	1	1	1	1	1	1	1	1	1	1	1	1	1	1	1	1	1	1	1	1	1	1	1	1	1	1	1	1	1	1	1	1	1	1	1	1	1
MElightyellow	1	1	1	1	1	1	1	1	1	1	1	1	1	1	1	1	1	1	1	1	1	1	1	1	1	1	1	1	1	1	0.443552	1	1	1	1	1	1	1	0.294589	1	0.108244	1	0.166169	1	1	1	1	1	1
MEmagenta	1	1	1	1	1	1	1	1	1	1	1	1	1	1	1	1	1	1	1	1	0.327234	1	1	1	1	1	0.440073	1	0.378361	1	0.71836	1	1	1	1	1	0.471686	1	1	1	1	1	0.209487	1	1	1	1	1	1
MEmediumpurple3	1	1	1	1	1	1	1	1	1	1	1	1	1	1	0.137567	1	1	1	0.157453	1	0.310281	1	1	1	0.0790589	1	1	1	1	1	1	1	0.00147407	1	1	1	1	1	1	1	0.199317	1	0.252027	1	1	1	1	1	1
MEmidnightblue	1	1	1	1	1	1	1	1	1	1	1	1	1	1	1	1	1	1	1	1	1	1	1	1	1	1	1	1	1	1	1	1	1	1	1	1	1	1	1	1	1	1	1	1	1	1	1	1	1
MEorange	1	1	1	1	1	1	1	1	1	1	1	1	1	1	1	1	1	1	1	1	1	1	1	1	1	1	1	1	1	1	1	1	1	1	1	1	1	1	1	1	1	1	1	1	1	1	1	1	1
MEorangered4	1	1	1	1	1	1	0.0916307	1	0.124924	1	0.00573068	1	0.0772513	1	1	1	0.00187156	1	1	1	1	1	1	1	0.0736199	1	1	1	1	1	1	1	1	1	1	1	0.10229	1	1	1	1	1	1	1	1	1	1	1	1
MEpaleturquoise	1	1	1	1	1	1	1	1	1	1	1	1	1	1	0.244521	1	1	1	0.277185	1	0.505303	1	1	1	1	1	1	1	0.151306	1	1	1	0.351599	1	1	1	1	1	1	1	0.0656646	1	0.423157	1	1	1	1	1	1
MEpink	1	1	1	1	1	1	1	1	1	1	1	1	1	1	1	1	1	1	1	1	1	1	1	1	1	1	1	1	1	1	1	1	1	1	1	1	1	1	1	1	1	1	1	1	1	1	1	1	1
MEplum1	1	1	1	1	1	1	1	1	1	1	1	1	1	1	1	1	1	1	1	1	1	1	1	1	1	1	1	1	1	1	1	1	1	1	1	1	1	1	1	1	1	1	1	1	1	1	1	1	1
MEpurple	1	1	0.363982	1	1	1	1	1	1	1	0.0941092	1	1	1	1	1	1	1	1	1	1	1	0.311844	1	0.34066	1	1	1	1	1	1	1	1	1	1	1	0.444425	1	0.500865	1	1	1	1	1	1	1	1	1	1
MEred	1	1	1	1	1	1	1	1	0.191461	1	1	1	1	1	0.22348	1	0.344776	1	0.646412	1	0.384748	1	1	1	0.393324	1	1	1	1	1	1	1	0.048884	1	1	1	1	1	1	1	0.044873	1	0.522256	1	1	1	1	1	1
MEroyalblue	1	1	1	1	1	1	1	1	1	1	1	1	1	1	1	1	1	1	1	1	1	1	1	1	1	1	1	1	1	1	1	1	1	1	1	1	1	1	1	1	1	1	1	1	1	1	1	1	1
MEsaddlebrown	1	1	1	1	1	1	1	1	1	1	1	1	0.156554	1	1	1	0.000334979	0.397955	0.286003	1	1	1	0.135246	1	0.14951	1	0.187553	1	0.156554	1	1	1	0.362135	1	0.170472	1	0.204288	1	1	1	1	1	1	1	1	1	0.23675	1	1
MEsalmon	1	1	1	1	1	1	1	1	1	1	1	1	0.297908	1	1	1	1	1	1	1	1	1	1	1	1	1	1	1	1	1	1	1	1	1	0.321762	1	1	1	1	1	1	1	1	1	1	1	1	1	1
MEsienna3	1	1	1	1	1	1	1	1	1	1	1	1	1	1	1	1	1	1	0.109718	1	1	1	1	1	1	1	1	1	1	1	1	1	1	1	1	1	1	1	1	1	1	1	0.178795	1	1	1	1	1	1
MEskyblue	1	1	1	1	1	1	1	1	1	1	1	1	1	1	1	1	1	1	1	1	0.025169	1	1	1	1	1	1	1	1	1	1	1	1	1	1	1	1	1	1	1	1	1	0.0132136	1	1	1	1	1	1
MEskyblue3	1	1	1	1	1	1	1	1	1	1	1	1	1	1	1	1	1	1	1	1	1	1	1	1	1	1	1	1	1	1	1	1	1	1	1	1	1	1	1	1	1	1	1	1	1	1	1	1	1
MEsteelblue	1	1	1	1	1	1	1	1	1	1	1	1	1	1	1	1	1	1	1	1	1	1	1	1	1	1	1	1	1	1	1	1	1	1	1	1	1	1	1	1	1	1	1	1	1	1	1	1	1
MEtan	1	1	1	1	1	1	1	1	1	1	1	1	1	1	1	1	1	1	1	1	1	1	1	1	1	1	1	1	1	1	1	1	1	1	1	1	1	1	1	1	1	1	1	1	1	1	1	1	1
MEturquoise	1	1	0.328026	1	1	1	0.63296	1	0.158597	1	0.694773	1	1	1	0.803919	1	1	1	9.60087e-05	0.114058	0.913487	1	1	1	1	1	0.318948	1	0.614497	1	1	1	2.3417e-08	2.78194e-05	1	1	0.360929	1	0.441629	1	1.83043e-22	2.17455e-19	0.206849	1	1	1	0.0619337	1	0.260598
MEviolet	1	1	1	1	1	1	1	1	1	1	1	1	1	1	1	1	1	1	1	1	0.44239	1	0.109703	1	1	1	1	1	1	1	1	1	1	1	1	1	1	1	1	1	1	1	1	1	1	1	1	1	1
MEwhite	1	1	1	1	1	1	1	1	1	1	1	1	1	1	1	1	1	1	1	1	1	1	1	1	1	1	1	1	1	1	1	1	1	1	1	1	1	1	1	1	1	1	1	1	1	1	1	1	1
MEyellow	1	1	1	1	1	1	1	1	1	1	1	1	1	1	1	1	1	1	0.729176	1	0.941128	1	1	1	1	1	1	1	1	1	1	1	1	1	1	1	1	1	1	1	1	1	0.890751	1	1	1	1	1	1
MEyellowgreen	1	1	1	1	1	1	1	1	1	1	1	1	1	1	1	1	1	1	1	1	1	1	1	1	1	1	1	1	1	1	1	1	1	1	1	1	1	1	1	1	1	1	1	1	1	1	1	1	1
Moudule	Amygdala		Cerebellum		Cortex		Hippocampus		Striatum		Thalamus		Cholin. neurons of basal forebrain		Cholin. neurons of brain stem		Seroton. neurons of brain stem		Astroglia of cerebellum		Oligodendrocyte of cerebellum		Golgi neurons of cerebellum		UPBCs and Bergman glia of cerebellum		Stellate and basket cells of cerebellum		Granule cells of cerebellum		Purkinje cells of cerebellum		Bergman glia and mature oligod. of cereb.		Cholin. neurons of striatum		D1+ MSNs of striatum		D2+ MSNs of striatum		Astrocytes of cortex		Oligodendrocyte of cortex		Cort+ neurons of cortex		Immune cells		Glt25d2 neurons of cortex
pSI = 0.01	P-value	Bonf. Adj.	P-value	Bonf. Adj.	P-value	Bonf. Adj.	P-value	Bonf. Adj.	P-value	Bonf. Adj.	P-value	Bonf. Adj.	P-value	Bonf. Adj.	P-value	Bonf. Adj.	P-value	Bonf. Adj.	P-value	Bonf. Adj.	P-value	Bonf. Adj.	P-value	Bonf. Adj.	P-value	Bonf. Adj.	P-value	Bonf. Adj.	P-value	Bonf. Adj.	P-value	Bonf. Adj.	P-value	Bonf. Adj.	P-value	Bonf. Adj.	P-value	Bonf. Adj.	P-value	Bonf. Adj.	P-value	Bonf. Adj.	P-value	Bonf. Adj.	P-value	Bonf. Adj.	P-value	Bonf. Adj.	P-value
MEblack	1	1	0.954435	1	1	1	1	1	0.0879439	1	1	1	0.669575	1	1	1	1	1	1	1	8.4032e-70	9.98301e-67	1	1	1	1	0.72205	1	0.812936	1	0.899438	1	0.316346	1	0.718594	1	0.881799	1	1	1	0.937356	1	4.80972e-59	5.71395e-56	1	1	1	1	0.561176
MEblue	1	1	0.999589	1	1	1	1	1	1	1	1	1	0.779991	1	1	1	1	1	1	1	0.920245	1	0.454113	1	1	1	1	1	1	1	0.956744	1	1	1	0.823361	1	1	1	1	1	0.977354	1	0.994138	1	1	1	1	1	1
MEbrown	1	1	1	1	1	1	1	1	1	1	1	1	0.481206	1	1	1	0.637203	1	1	1	1	1	1	1	1	1	1	1	0.915406	1	1	1	1	1	1	1	1	1	1	1	1	1	1	1	1	1	1	1	1
MEcyan	1	1	0.959158	1	1	1	1	1	1	1	1	1	1	1	1	1	1	1	0.871356	1	0.289669	1	1	1	1	1	1	1	1	1	0.783066	1	0.853064	1	1	1	1	1	0.746163	1	1	1	0.232493	1	1	1	0.712692	1	1
MEdarkgreen	1	1	0.0322975	1	0.000445949	0.117731	1	1	0.586238	1	7.56457e-06	0.00199705	0.0623218	1	0.140778	1	1	1	1	1	1	1	0.0647706	1	0.320081	1	0.080113	1	0.125535	1	0.571484	1	1	1	0.00118871	1	0.54516	1	0.532479	1	1	1	1	1	0.224217	1	1	1	1
MEdarkgrey	1	1	0.533858	1	1	1	1	1	0.586238	1	0.0188529	1	0.348858	1	0.152167	1	1	1	0.697051	1	0.800504	1	0.355058	1	0.00760437	1	0.391056	1	1	1	2.53828e-06	0.00301548	0.0984099	1	0.388133	1	0.197801	1	0.54996	1	0.65811	1	0.766877	1	1	1	0.00580486	1	0.273204
MEdarkmagenta	1	1	0.00966313	1	0.0371559	1	0.0347449	1	0.0649829	1	0.0123339	1	1	1	1	1	1	1	0.400162	1	1	1	0.171148	1	1	1	1	1	1	1	0.31673	1	0.379954	1	1	1	0.298174	1	0.289447	1	1	1	1	1	0.107836	1	0.0378328	1	1
MEdarkolivegreen	1	1	0.427186	1	0.0958596	1	0.00159122	0.420082	0.0344441	1	0.0501041	1	1	1	1	1	1	1	1	1	0.314129	1	1	1	1	1	1	1	0.370966	1	0.470175	1	1	1	1	1	0.000282589	0.335716	0.000239951	0.285062	1	1	0.64634	1	1	1	1	1	0.0014931
MEdarkorange	1	1	0.0223219	1	1	1	0.430702	1	1	1	0.235842	1	1	1	1	1	1	1	0.226777	1	1	1	0.28393	1	0.265441	1	0.314572	1	0.390144	1	0.145005	1	0.572751	1	1	1	0.467387	1	0.455546	1	0.55836	1	1	1	1	1	0.424806	1	1
MEdarkred	1	1	0.871948	1	1	1	1	1	1	1	1	1	1	1	1	1	1	1	1	1	1	1	1	1	1	1	0.361533	1	1	1	0.552896	1	1	1	1	1	1	1	1	1	1	1	1	1	1	1	1	1	1
MEdarkturquoise	1	1	0.204041	1	1	1	5.73589e-25	1.51428e-22	0.178736	1	1	1	1	1	1	1	1	1	1	1	1	1	1	1	1	1	1	1	1	1	1	1	1	1	1	1	1	1	1	1	0.378968	1	0.476035	1	1	1	1	1	1
MEgreen	1	1	0.117734	1	0.873831	1	0.863979	1	0.0227275	1	0.635224	1	0.335048	1	0.8587	1	1	1	0.845525	1	0.939056	1	1	1	0.6791	1	0.751348	1	0.838321	1	0.917653	1	0.372103	1	0.747985	1	0.402491	1	0.651965	1	1	1	1	1	0.526693	1	9.8459e-15	1.16969e-11	1
MEgreenyellow	1	1	1	1	1	1	1	1	1	1	1	1	0.321642	1	1	1	1	1	1	1	1	1	1	1	1	1	1	1	1	1	1	1	1	1	1	1	1	1	1	1	1	1	1	1	1	1	1	1	1
MEgrey	0.548642	1	0.000103785	0.0273993	4.12983e-13	1.09027e-10	0.00538375	1	0.0893237	1	1.04451e-06	0.000275752	0.97483	1	0.744311	1	0.988334	1	1	1	1	1	0.999979	1	0.999769	1	0.72819	1	0.952552	1	0.869354	1	1	1	0.954852	1	0.788497	1	0.752232	1	1	1	1	1	0.882396	1	0.999995	1	0.173071
MEgrey60	0.125174	1	0.563325	1	0.654132	1	0.26981	1	0.423419	1	0.816119	1	1	1	1	1	1	1	0.832021	1	1	1	0.480652	1	1	1	1	1	1	1	0.144736	1	1	1	0.519931	1	0.00140967	1	2.72861e-07	0.000324159	1	1	0.886426	1	0.328514	1	1	1	0.379166
MElightcyan	1	1	0.100197	1	1	1	0.210249	1	0.0073572	1	0.759175	1	1	1	1	1	1	1	0.7297	1	0.828965	1	0.0825333	1	1	1	0.419226	1	1	1	0.251424	1	1	1	0.416172	1	1	1	1	1	0.691413	1	0.79714	1	0.25328	1	1	1	1
MElightgreen	1	1	0.928657	1	1	1	1	1	1	1	0.777539	1	1	1	1	1	1	1	1	1	1	1	1	1	1	1	1	1	1	1	1	1	1	1	1	1	1	1	0.655413	1	1	1	1	1	1	1	1	1	1
MElightyellow	1	1	0.0650473	1	1	1	1	1	1	1	0.351402	1	1	1	1	1	1	1	1	1	0.104004	1	1	1	1	1	1	1	1	1	0.633299	1	0.716053	1	1	1	0.606483	1	0.593462	1	0.117791	1	0.0228249	1	1	1	0.194907	1	0.302142
MEmagenta	1	1	0.948846	1	1	1	1	1	1	1	1	1	1	1	1	1	1	1	1	1	0.000131777	0.156551	1	1	1	1	0.701436	1	0.20651	1	0.885665	1	1	1	1	1	0.594962	1	0.85711	1	1	1	1.05566e-05	0.0125412	1	1	1	1	1
MEmediumpurple3	1	1	0.56488	1	1	1	1	1	1	1	1	1	1	1	0.266239	1	1	1	0.0150619	1	0.511037	1	1	1	0.000736609	0.875092	1	1	1	1	1	1	4.02132e-07	0.000477733	1	1	1	1	1	1	0.0802854	1	0.476035	1	1	1	1	1	1
MEmidnightblue	1	1	1	1	1	1	1	1	1	1	1	1	1	1	1	1	1	1	1	1	1	1	1	1	1	1	1	1	1	1	1	1	1	1	1	1	1	1	1	1	1	1	1	1	1	1	1	1	1
MEorange	1	1	1	1	1	1	1	1	1	1	1	1	1	1	1	1	1	1	1	1	1	1	1	1	1	1	1	1	1	1	1	1	1	1	1	1	1	1	1	1	1	1	1	1	1	1	1	1	1
MEorangered4	1	1	0.0604716	1	0.278711	1	1.38186e-05	0.00364811	0.0725228	1	0.0939195	1	0.0132593	1	0.249816	1	0.00531015	1	1	1	0.0268675	1	1	1	0.01189	1	1	1	1	1	1	1	1	1	1	1	0.288901	1	1	1	1	1	0.117789	1	1	1	1	1	0.123231
MEpaleturquoise	1	1	0.800142	1	1	1	1	1	0.183575	1	1	1	1	1	0.443746	1	1	1	0.000446986	0.531019	0.742201	1	1	1	1	1	1	1	0.420824	1	1	1	0.0657344	1	1	1	1	1	1	1	0.000253842	0.301565	0.341317	1	1	1	1	1	1
MEpink	1	1	1	1	1	1	1	1	1	1	1	1	1	1	1	1	1	1	1	1	1	1	1	1	1	1	1	1	1	1	1	1	1	1	1	1	1	1	1	1	0.918921	1	0.966917	1	1	1	1	1	1
MEplum1	1	1	1	1	1	1	1	1	1	1	1	1	1	1	1	1	1	1	0.30201	1	1	1	1	1	1	1	1	1	1	1	1	1	1	1	1	1	1	1	0.21368	1	1	1	1	1	1	1	1	1	1
MEpurple	1	1	0.589642	1	0.774691	1	0.76216	1	0.870187	1	0.683774	1	1	1	1	1	1	1	1	1	1	1	0.626385	1	0.597226	1	0.671578	1	0.76726	1	1	1	1	1	1	1	0.278257	1	0.531332	1	1	1	1	1	0.450343	1	0.481234	1	0.51145
MEred	0.220731	1	0.796924	1	1	1	1	1	0.503168	1	0.202237	1	0.68511	1	0.000551177	0.654798	0.512307	1	0.390434	1	0.422618	1	0.326994	1	0.294172	1	1	1	0.826087	1	1	1	0.000794128	0.943424	1	1	1	1	0.88357	1	0.00790108	1	0.0398742	1	1	1	0.304835	1	1
MEroyalblue	1	1	0.196994	1	1	1	1	1	1	1	1	1	1	1	1	1	1	1	1	1	1	1	1	1	1	1	1	1	1	1	0.499314	1	1	1	1	1	1	1	0.462412	1	1	1	1	1	1	1	1	1	0.21969
MEsaddlebrown	1	1	0.810955	1	1	1	1	1	1	1	0.06768	1	0.312322	1	1	1	0.00159128	1	0.647333	1	0.755083	1	0.31804	1	0.29782	1	0.351381	1	0.432663	1	1	1	0.62268	1	0.348665	1	0.160453	1	0.501833	1	1	1	1	1	1	1	0.130532	1	1
MEsalmon	1	1	1	1	1	1	1	1	1	1	1	1	0.540603	1	0.717626	1	1	1	1	1	0.946206	1	0.548503	1	1	1	1	1	0.69194	1	1	1	1	1	0.589605	1	1	1	1	1	1	1	1	1	1	1	1	1	0.439291
MEsienna3	1	1	0.500097	1	1	1	1	1	1	1	1	1	1	1	1	1	1	1	0.30201	1	0.384506	1	1	1	1	1	1	1	1	1	1	1	1	1	1	1	1	1	1	1	1	1	0.354952	1	1	1	1	1	1
MEskyblue	1	1	1	1	1	1	1	1	1	1	1	1	1	1	0.0974796	1	1	1	1	1	0.0323362	1	1	1	1	1	1	1	1	1	1	1	0.572751	1	1	1	1	1	1	1	1	1	0.00457355	1	1	1	1	1	1
MEskyblue3	1	1	0.631657	1	1	1	1	1	1	1	1	1	1	1	1	1	1	1	1	1	1	1	1	1	1	1	1	1	1	1	1	1	1	1	1	1	1	1	1	1	1	1	0.463787	1	1	1	1	1	1
MEsteelblue	1	1	0.782755	1	1	1	1	1	1	1	1	1	1	1	0.437544	1	1	1	1	1	1	1	1	1	1	1	1	1	1	1	1	1	1	1	1	1	1	1	1	1	1	1	1	1	1	1	1	1	1
MEtan	1	1	1	1	1	1	1	1	1	1	1	1	1	1	1	1	1	1	1	1	1	1	1	1	1	1	1	1	1	1	1	1	1	1	1	1	0.318041	1	0.303384	1	1	1	1	1	1	1	0.637766	1	1
MEturquoise	0.0664997	1	0.827366	1	0.966875	1	0.962512	1	3.88943e-06	0.00102681	0.784347	1	1	1	0.966893	1	1	1	9.76621e-23	1.16023e-19	0.0227665	1	0.882706	1	0.013367	1	0.428282	1	0.823026	1	0.987072	1	5.11312e-19	6.07439e-16	1	1	0.564037	1	0.741442	1	3.44749e-45	4.09562e-42	0.159947	1	1	1	0.000199088	0.236517	0.789701
MEviolet	1	1	1	1	1	1	1	1	1	1	1	1	1	1	1	1	1	1	1	1	0.675346	1	0.263687	1	1	1	1	1	1	1	1	1	1	1	1	1	1	1	0.427203	1	1	1	1	1	0.169783	1	1	1	1
MEwhite	1	1	1	1	1	1	1	1	1	1	1	1	1	1	1	1	1	1	1	1	1	1	1	1	1	1	1	1	1	1	1	1	1	1	1	1	1	1	1	1	1	1	1	1	1	1	1	1	1
MEyellow	1	1	1	1	1	1	1	1	1	1	1	1	1	1	1	1	1	1	0.98243	1	0.445211	1	1	1	1	1	0.813379	1	0.641649	1	1	1	1	1	1	1	1	1	1	1	1	1	0.865642	1	1	1	1	1	1
MEyellowgreen	1	1	1	1	1	1	1	1	1	1	1	1	1	1	1	1	1	1	1	1	1	1	1	1	1	1	1	1	1	1	1	1	1	1	1	1	0.359806	1	0.349763	1	1	1	1	1	1	1	1	1	0.158045
[truncated: 17 more columns]
