# Supplementary material for: Comprehensive transcriptomic analysis indicates brain regional specific alterations in type 2 diabetes
Source: Aging (Albany NY). 2019 Aug 26;11(16):6398–421. doi: 10.18632/aging.102196 (PMC6738403; doi:10.18632/aging.102196)
Supplement: Supplementary Table 10 [file aging-11-102196-s006.xlsx]

## Sheet: pooled
Supplementary Table 10. Functional annotations of caudate modules (sub-modules)
Module	Category	ID	Description	Count	P-value	FDR
black	GO BP term	GO:0010256	endomembrane system organization	20	1.16276e-07	0.000306969
black	GO BP term	GO:0000209	protein polyubiquitination	13	1.61371e-05	0.0166207
black	GO BP term	GO:0036258	multivesicular body assembly	5	2.51073e-05	0.0166207
black	GO BP term	GO:0036257	multivesicular body organization	5	2.93253e-05	0.0166207
black	GO BP term	GO:0016236	macroautophagy	13	3.31115e-05	0.0166207
black	GO BP term	GO:0007032	endosome organization	7	3.77744e-05	0.0166207
black	GO BP term	GO:0043161	proteasome-mediated ubiquitin-dependent protein catabolic process	15	0.000120229	0.0340529
black	GO BP term	GO:0000045	autophagosome assembly	7	0.000132268	0.0340529
black	GO BP term	GO:0006913	nucleocytoplasmic transport	14	0.00014616	0.0340529
black	GO BP term	GO:0032528	microvillus organization	4	0.000154133	0.0340529
black	GO BP term	GO:0051169	nuclear transport	14	0.000158022	0.0340529
black	GO BP term	GO:0051168	nuclear export	10	0.00015971	0.0340529
black	GO BP term	GO:1905037	autophagosome organization	7	0.000168625	0.0340529
black	GO BP term	GO:0046755	viral budding	4	0.000180583	0.0340529
black	GO BP term	GO:0032886	regulation of microtubule-based process	10	0.000238153	0.0419149
black	KEGG pathway	hsa04140	Autophagy - animal	11	1.57208e-05	0.00267253
black	KEGG pathway	hsa04144	Endocytosis	13	0.000293752	0.0249689
black	KEGG pathway	hsa04910	Insulin signaling pathway	9	0.000640878	0.0287968
black	KEGG pathway	hsa03440	Homologous recombination	5	0.000814961	0.0287968
black	KEGG pathway	hsa04137	Mitophagy - animal	6	0.000949908	0.0287968
black	KEGG pathway	hsa04914	Progesterone-mediated oocyte maturation	7	0.00117406	0.0287968
black	KEGG pathway	hsa04664	Fc epsilon RI signaling pathway	6	0.00122797	0.0287968
black	KEGG pathway	hsa03018	RNA degradation	6	0.00135514	0.0287968
black	KEGG pathway	hsa04625	C-type lectin receptor signaling pathway	7	0.00181121	0.0319751
black	KEGG pathway	hsa04920	Adipocytokine signaling pathway	6	0.00188089	0.0319751
black	KEGG pathway	hsa04917	Prolactin signaling pathway	6	0.00214836	0.0328124
black	KEGG pathway	hsa04068	FoxO signaling pathway	8	0.00231617	0.0328124
black	KEGG pathway	hsa04141	Protein processing in endoplasmic reticulum	9	0.00271409	0.0354919
black	KEGG pathway	hsa05212	Pancreatic cancer	6	0.00312468	0.0379426
black	KEGG pathway	hsa04371	Apelin signaling pathway	8	0.00389854	0.0441835
black	KEGG pathway	hsa04071	Sphingolipid signaling pathway	7	0.00479249	0.0496407
black	KEGG pathway	hsa04012	ErbB signaling pathway	6	0.00525607	0.0496407
black	KEGG pathway	hsa04211	Longevity regulating pathway	6	0.00525607	0.0496407
blue	GO BP term	GO:0044782	cilium organization	87	4.70033e-71	1.26909e-67
blue	GO BP term	GO:0060271	cilium assembly	82	4.4321e-66	5.98334e-63
blue	GO BP term	GO:0035082	axoneme assembly	37	2.53942e-49	2.28548e-46
blue	GO BP term	GO:0007018	microtubule-based movement	60	2.36229e-48	1.59455e-45
blue	GO BP term	GO:0003341	cilium movement	36	1.03692e-46	5.59936e-44
blue	GO BP term	GO:0001578	microtubule bundle formation	38	3.14397e-43	1.41479e-40
blue	GO BP term	GO:0070286	axonemal dynein complex assembly	20	4.26937e-28	1.64676e-25
blue	GO BP term	GO:0001539	cilium or flagellum-dependent cell motility	15	4.93618e-18	1.48085e-15
blue	GO BP term	GO:0060285	cilium-dependent cell motility	15	4.93618e-18	1.48085e-15
blue	GO BP term	GO:0042073	intraciliary transport	16	2.00115e-16	5.4031e-14
blue	GO BP term	GO:0030317	flagellated sperm motility	19	1.60985e-15	3.62215e-13
blue	GO BP term	GO:0097722	sperm motility	19	1.60985e-15	3.62215e-13
blue	GO BP term	GO:0003351	epithelial cilium movement	11	5.89239e-14	1.2238e-11
blue	GO BP term	GO:0007368	determination of left/right symmetry	19	1.74748e-13	3.37013e-11
blue	GO BP term	GO:0036159	inner dynein arm assembly	9	4.82253e-13	8.68055e-11
blue	GO BP term	GO:0009855	determination of bilateral symmetry	19	7.74452e-13	1.30689e-10
blue	GO BP term	GO:0009799	specification of symmetry	19	8.92005e-13	1.41671e-10
blue	GO BP term	GO:0044458	motile cilium assembly	10	2.76827e-12	4.15241e-10
blue	GO BP term	GO:0036158	outer dynein arm assembly	9	4.47879e-12	6.36459e-10
blue	GO BP term	GO:0060294	cilium movement involved in cell motility	8	6.69987e-10	9.04483e-08
blue	GO BP term	GO:0035735	intraciliary transport involved in cilium assembly	10	9.39989e-10	1.20856e-07
blue	GO BP term	GO:0010970	transport along microtubule	17	1.26971e-09	1.49052e-07
blue	GO BP term	GO:0099111	microtubule-based transport	17	1.26971e-09	1.49052e-07
blue	GO BP term	GO:0007389	pattern specification process	28	7.20183e-09	8.10205e-07
blue	GO BP term	GO:0030705	cytoskeleton-dependent intracellular transport	17	1.60483e-08	1.73322e-06
blue	GO BP term	GO:0007288	sperm axoneme assembly	6	1.9408e-08	2.01544e-06
blue	GO BP term	GO:0007224	smoothened signaling pathway	14	8.32795e-08	8.32795e-06
blue	GO BP term	GO:0061512	protein localization to cilium	9	9.86341e-08	9.37446e-06
blue	GO BP term	GO:0003352	regulation of cilium movement	6	1.00689e-07	9.37446e-06
blue	GO BP term	GO:0048515	spermatid differentiation	14	5.79305e-07	5.0625e-05
blue	GO BP term	GO:0060287	epithelial cilium movement involved in determination of left/right asymmetry	5	5.8125e-07	5.0625e-05
blue	GO BP term	GO:0007286	spermatid development	13	2.19352e-06	0.000185078
blue	GO BP term	GO:1902017	regulation of cilium assembly	8	3.85919e-06	0.000314103
blue	GO BP term	GO:0060632	regulation of microtubule-based movement	6	3.95537e-06	0.000314103
blue	GO BP term	GO:0032886	regulation of microtubule-based process	15	8.84234e-06	0.000682123
blue	GO BP term	GO:0031503	protein-containing complex localization	17	1.6146e-05	0.00121095
blue	GO BP term	GO:0003356	regulation of cilium beat frequency	4	2.44899e-05	0.0017871
blue	GO BP term	GO:0035721	intraciliary retrograde transport	4	3.62435e-05	0.0025752
blue	GO BP term	GO:0097711	ciliary basal body-plasma membrane docking	9	8.76893e-05	0.0060708
blue	GO BP term	GO:0046940	nucleoside monophosphate phosphorylation	4	9.59919e-05	0.00647945
blue	GO BP term	GO:0009132	nucleoside diphosphate metabolic process	9	0.000198075	0.013044
blue	GO BP term	GO:1902115	regulation of organelle assembly	12	0.000368356	0.0236243
blue	GO BP term	GO:0048568	embryonic organ development	19	0.000376239	0.0236243
blue	GO BP term	GO:1905515	non-motile cilium assembly	6	0.000400646	0.0245851
blue	GO BP term	GO:0021591	ventricular system development	5	0.000433422	0.0260053
blue	GO BP term	GO:0048592	eye morphogenesis	10	0.000532951	0.0312819
blue	GO BP term	GO:0008589	regulation of smoothened signaling pathway	7	0.000564551	0.0322669
blue	GO BP term	GO:0042733	embryonic digit morphogenesis	6	0.000579215	0.0322669
blue	GO BP term	GO:0021915	neural tube development	10	0.000585585	0.0322669
blue	GO BP term	GO:0007281	germ cell development	13	0.00065916	0.0355946
blue	GO BP term	GO:0001654	eye development	16	0.000885226	0.0468649
blue	GO BP term	GO:0150063	visual system development	16	0.000909887	0.0472441
blue	GO BP term	GO:1990403	embryonic brain development	3	0.000951506	0.0484729
blue	KEGG pathway	hsa04974	Protein digestion and absorption	12	1.57205e-07	1.84753e-05
blue	KEGG pathway	hsa05016	Huntington disease	17	2.2809e-07	1.84753e-05
blue	KEGG pathway	hsa00730	Thiamine metabolism	4	0.00028272	0.0152669
blue	KEGG pathway	hsa00360	Phenylalanine metabolism	4	0.000522235	0.0209939
blue	KEGG pathway	hsa04979	Cholesterol metabolism	6	0.0006573	0.0209939
blue	KEGG pathway	hsa00340	Histidine metabolism	4	0.000777553	0.0209939
blue	KEGG pathway	hsa00350	Tyrosine metabolism	5	0.000951866	0.0220289
brown	GO BP term	GO:0034341	response to interferon-gamma	39	1.21204e-15	5.09543e-12
brown	GO BP term	GO:0043122	regulation of I-kappaB kinase/NF-kappaB signaling	30	4.02023e-13	7.25791e-10
brown	GO BP term	GO:0043123	positive regulation of I-kappaB kinase/NF-kappaB signaling	27	5.17929e-13	7.25791e-10
brown	GO BP term	GO:0007249	I-kappaB kinase/NF-kappaB signaling	32	7.24892e-13	7.61861e-10
brown	GO BP term	GO:0060333	interferon-gamma-mediated signaling pathway	25	5.084e-11	4.27462e-08
brown	GO BP term	GO:0051607	defense response to virus	28	7.89754e-11	5.53354e-08
brown	GO BP term	GO:0009615	response to virus	33	1.01038e-10	6.06808e-08
brown	GO BP term	GO:0034340	response to type I interferon	20	8.56397e-10	4.50037e-07
brown	GO BP term	GO:0071346	cellular response to interferon-gamma	29	1.13238e-09	5.28948e-07
brown	GO BP term	GO:0097191	extrinsic apoptotic signaling pathway	25	2.59222e-09	1.07174e-06
brown	GO BP term	GO:0060337	type I interferon signaling pathway	19	3.05919e-09	1.07174e-06
brown	GO BP term	GO:0071357	cellular response to type I interferon	19	3.05919e-09	1.07174e-06
brown	GO BP term	GO:0045088	regulation of innate immune response	35	9.78452e-09	3.16416e-06
brown	GO BP term	GO:0002237	response to molecule of bacterial origin	31	1.94377e-08	5.83687e-06
brown	GO BP term	GO:0032496	response to lipopolysaccharide	30	2.32733e-08	6.52274e-06
brown	GO BP term	GO:0043900	regulation of multi-organism process	33	3.66364e-08	9.49968e-06
brown	GO BP term	GO:0050777	negative regulation of immune response	19	3.84145e-08	9.49968e-06
brown	GO BP term	GO:2001236	regulation of extrinsic apoptotic signaling pathway	19	4.64425e-08	1.08469e-05
brown	GO BP term	GO:0019058	viral life cycle	28	5.94531e-08	1.31548e-05
brown	GO BP term	GO:2001233	regulation of apoptotic signaling pathway	31	9.9854e-08	2.09893e-05
brown	GO BP term	GO:0050900	leukocyte migration	33	1.21462e-07	2.43155e-05
brown	GO BP term	GO:0045576	mast cell activation	11	1.34021e-07	2.56102e-05
brown	GO BP term	GO:1903900	regulation of viral life cycle	19	1.49138e-07	2.72598e-05
brown	GO BP term	GO:2001234	negative regulation of apoptotic signaling pathway	22	1.98469e-07	3.4665e-05
brown	GO BP term	GO:0071222	cellular response to lipopolysaccharide	22	2.12927e-07	3.4665e-05
brown	GO BP term	GO:0050792	regulation of viral process	21	2.14389e-07	3.4665e-05
brown	GO BP term	GO:0032479	regulation of type I interferon production	16	2.24475e-07	3.49515e-05
brown	GO BP term	GO:0032606	type I interferon production	16	2.48526e-07	3.73145e-05
brown	GO BP term	GO:0033003	regulation of mast cell activation	9	3.18827e-07	4.5929e-05
brown	GO BP term	GO:0001667	ameboidal-type cell migration	32	3.27752e-07	4.5929e-05
brown	GO BP term	GO:0097193	intrinsic apoptotic signaling pathway	25	3.65767e-07	4.6872e-05
brown	GO BP term	GO:0071219	cellular response to molecule of bacterial origin	22	3.68585e-07	4.6872e-05
brown	GO BP term	GO:0060759	regulation of response to cytokine stimulus	19	3.68757e-07	4.6872e-05
brown	GO BP term	GO:0046718	viral entry into host cell	17	3.79079e-07	4.6872e-05
brown	GO BP term	GO:0002221	pattern recognition receptor signaling pathway	20	4.4384e-07	5.33115e-05
brown	GO BP term	GO:0002526	acute inflammatory response	18	5.12069e-07	5.97983e-05
brown	GO BP term	GO:0045089	positive regulation of innate immune response	28	6.88305e-07	7.82063e-05
brown	GO BP term	GO:0001959	regulation of cytokine-mediated signaling pathway	18	7.07377e-07	7.82582e-05
brown	GO BP term	GO:0034612	response to tumor necrosis factor	24	1.03831e-06	0.000104027
brown	GO BP term	GO:0030260	entry into host cell	17	1.06402e-06	0.000104027
brown	GO BP term	GO:0044409	entry into host	17	1.06402e-06	0.000104027
brown	GO BP term	GO:0051806	entry into cell of other organism involved in symbiotic interaction	17	1.06402e-06	0.000104027
brown	GO BP term	GO:0051828	entry into other organism involved in symbiotic interaction	17	1.06402e-06	0.000104027
brown	GO BP term	GO:0002460	adaptive immune response based on somatic recombination of immune receptors built from immunoglobulin superfamily domains	26	1.18296e-06	0.000110515
brown	GO BP term	GO:0007596	blood coagulation	26	1.18296e-06	0.000110515
brown	GO BP term	GO:1902041	regulation of extrinsic apoptotic signaling pathway via death domain receptors	10	1.48853e-06	0.000136038
brown	GO BP term	GO:0071216	cellular response to biotic stimulus	22	1.57493e-06	0.000137628
brown	GO BP term	GO:0007599	hemostasis	26	1.60413e-06	0.000137628
brown	GO BP term	GO:0050817	coagulation	26	1.60413e-06	0.000137628
brown	GO BP term	GO:0043903	regulation of symbiosis, encompassing mutualism through parasitism	21	2.09375e-06	0.000174079
brown	GO BP term	GO:0043542	endothelial cell migration	22	2.1118e-06	0.000174079
brown	GO BP term	GO:0045071	negative regulation of viral genome replication	10	2.38574e-06	0.000190355
brown	GO BP term	GO:0046631	alpha-beta T cell activation	16	2.39982e-06	0.000190355
brown	GO BP term	GO:0071356	cellular response to tumor necrosis factor	22	2.50928e-06	0.000195352
brown	GO BP term	GO:0016485	protein processing	22	2.81095e-06	0.000214859
brown	GO BP term	GO:0001818	negative regulation of cytokine production	23	2.88397e-06	0.000216504
brown	GO BP term	GO:0032060	bleb assembly	5	3.49178e-06	0.000255738
brown	GO BP term	GO:0046596	regulation of viral entry into host cell	9	3.52826e-06	0.000255738
brown	GO BP term	GO:0043304	regulation of mast cell degranulation	7	3.78094e-06	0.000265266
brown	GO BP term	GO:0051701	interaction with host	21	3.78591e-06	0.000265266
brown	GO BP term	GO:0002285	lymphocyte activation involved in immune response	17	3.93105e-06	0.00027092
brown	GO BP term	GO:0010631	epithelial cell migration	25	4.20334e-06	0.000285014
brown	GO BP term	GO:0018212	peptidyl-tyrosine modification	27	4.52878e-06	0.000300784
brown	GO BP term	GO:0007265	Ras protein signal transduction	29	4.57901e-06	0.000300784
brown	GO BP term	GO:0090132	epithelium migration	25	4.8508e-06	0.000310813
brown	GO BP term	GO:0033006	regulation of mast cell activation involved in immune response	7	4.87955e-06	0.000310813
brown	GO BP term	GO:0002224	toll-like receptor signaling pathway	15	5.4116e-06	0.000339557
brown	GO BP term	GO:0045069	regulation of viral genome replication	12	5.93503e-06	0.000366925
brown	GO BP term	GO:2001237	negative regulation of extrinsic apoptotic signaling pathway	13	6.37275e-06	0.000385949
brown	GO BP term	GO:0090130	tissue migration	25	6.42636e-06	0.000385949
brown	GO BP term	GO:0046632	alpha-beta T cell differentiation	12	7.30388e-06	0.000429679
brown	GO BP term	GO:0060760	positive regulation of response to cytokine stimulus	10	7.39236e-06	0.000429679
brown	GO BP term	GO:0048525	negative regulation of viral process	14	7.46113e-06	0.000429679
brown	GO BP term	GO:1903901	negative regulation of viral life cycle	13	7.6759e-06	0.000436074
brown	GO BP term	GO:0008630	intrinsic apoptotic signaling pathway in response to DNA damage	13	8.41152e-06	0.000471494
brown	GO BP term	GO:0045785	positive regulation of cell adhesion	29	9.09552e-06	0.000503126
brown	GO BP term	GO:0051604	protein maturation	24	9.37463e-06	0.000511831
brown	GO BP term	GO:0043300	regulation of leukocyte degranulation	8	9.82014e-06	0.000525538
brown	GO BP term	GO:0060325	face morphogenesis	7	9.87571e-06	0.000525538
brown	GO BP term	GO:0070613	regulation of protein processing	14	1.03888e-05	0.00054593
brown	GO BP term	GO:0072659	protein localization to plasma membrane	20	1.12311e-05	0.000582906
brown	GO BP term	GO:0018108	peptidyl-tyrosine phosphorylation	26	1.16414e-05	0.000592123
brown	GO BP term	GO:0043303	mast cell degranulation	8	1.16903e-05	0.000592123
brown	GO BP term	GO:1903317	regulation of protein maturation	14	1.22022e-05	0.000602002
brown	GO BP term	GO:0043297	apical junction assembly	10	1.22692e-05	0.000602002
brown	GO BP term	GO:0002218	activation of innate immune response	22	1.2315e-05	0.000602002
brown	GO BP term	GO:1901653	cellular response to peptide	25	1.26064e-05	0.000609163
brown	GO BP term	GO:0002279	mast cell activation involved in immune response	8	1.38517e-05	0.000661733
brown	GO BP term	GO:0002758	innate immune response-activating signal transduction	21	1.46303e-05	0.000691078
brown	GO BP term	GO:0050727	regulation of inflammatory response	27	1.53555e-05	0.00071398
brown	GO BP term	GO:0031589	cell-substrate adhesion	24	1.54548e-05	0.00071398
brown	GO BP term	GO:0030198	extracellular matrix organization	25	1.56412e-05	0.000714734
brown	GO BP term	GO:0002448	mast cell mediated immunity	8	1.63395e-05	0.000738618
brown	GO BP term	GO:0048010	vascular endothelial growth factor receptor signaling pathway	11	1.8424e-05	0.000823983
brown	GO BP term	GO:0001961	positive regulation of cytokine-mediated signaling pathway	9	2.11724e-05	0.000936935
brown	GO BP term	GO:0002685	regulation of leukocyte migration	17	2.1803e-05	0.000954791
brown	GO BP term	GO:0071260	cellular response to mechanical stimulus	10	2.20657e-05	0.000956332
brown	GO BP term	GO:0043534	blood vessel endothelial cell migration	16	2.24386e-05	0.00095821
brown	GO BP term	GO:0033209	tumor necrosis factor-mediated signaling pathway	14	2.25649e-05	0.00095821
brown	GO BP term	GO:0007159	leukocyte cell-cell adhesion	25	2.68726e-05	0.00112973
brown	GO BP term	GO:1902042	negative regulation of extrinsic apoptotic signaling pathway via death domain receptors	7	2.71793e-05	0.00113131
brown	GO BP term	GO:0032481	positive regulation of type I interferon production	10	2.75442e-05	0.00113525
brown	GO BP term	GO:0052548	regulation of endopeptidase activity	28	2.83496e-05	0.0011571
brown	GO BP term	GO:0008625	extrinsic apoptotic signaling pathway via death domain receptors	11	3.01473e-05	0.00121865
brown	GO BP term	GO:0043901	negative regulation of multi-organism process	18	3.21497e-05	0.00128166
brown	GO BP term	GO:0046634	regulation of alpha-beta T cell activation	12	3.24236e-05	0.00128166
brown	GO BP term	GO:0002755	MyD88-dependent toll-like receptor signaling pathway	7	3.26207e-05	0.00128166
brown	GO BP term	GO:0002576	platelet degranulation	13	3.74736e-05	0.00145869
brown	GO BP term	GO:0051092	positive regulation of NF-kappaB transcription factor activity	15	3.78817e-05	0.00146105
brown	GO BP term	GO:0034330	cell junction organization	21	3.84116e-05	0.00146802
brown	GO BP term	GO:0046635	positive regulation of alpha-beta T cell activation	9	3.95732e-05	0.00149879
brown	GO BP term	GO:1902905	positive regulation of supramolecular fiber organization	17	4.13048e-05	0.0015407
brown	GO BP term	GO:0034134	toll-like receptor 2 signaling pathway	5	4.14126e-05	0.0015407
brown	GO BP term	GO:0032418	lysosome localization	9	4.45377e-05	0.00164243
brown	GO BP term	GO:0060323	head morphogenesis	7	4.61988e-05	0.00168887
brown	GO BP term	GO:0006909	phagocytosis	19	4.83137e-05	0.00175095
brown	GO BP term	GO:0071496	cellular response to external stimulus	22	5.32866e-05	0.00191467
brown	GO BP term	GO:1903706	regulation of hemopoiesis	27	5.50976e-05	0.00196297
brown	GO BP term	GO:1902903	regulation of supramolecular fiber organization	23	5.74932e-05	0.00203111
brown	GO BP term	GO:0032956	regulation of actin cytoskeleton organization	22	5.79927e-05	0.00203168
brown	GO BP term	GO:0035456	response to interferon-beta	6	6.07973e-05	0.00211233
brown	GO BP term	GO:0043062	extracellular structure organization	26	6.25243e-05	0.00215452
brown	GO BP term	GO:0035329	hippo signaling	7	6.40923e-05	0.0021906
brown	GO BP term	GO:0070661	leukocyte proliferation	22	6.85336e-05	0.00232351
brown	GO BP term	GO:0070498	interleukin-1-mediated signaling pathway	8	6.93391e-05	0.00233201
brown	GO BP term	GO:0050730	regulation of peptidyl-tyrosine phosphorylation	18	7.01896e-05	0.00234188
brown	GO BP term	GO:0007568	aging	21	7.79399e-05	0.00252425
brown	GO BP term	GO:0071214	cellular response to abiotic stimulus	21	7.79399e-05	0.00252425
brown	GO BP term	GO:0104004	cellular response to environmental stimulus	21	7.79399e-05	0.00252425
brown	GO BP term	GO:0019079	viral genome replication	12	7.80572e-05	0.00252425
brown	GO BP term	GO:0071375	cellular response to peptide hormone stimulus	21	8.48317e-05	0.00272238
brown	GO BP term	GO:0032943	mononuclear cell proliferation	21	8.84765e-05	0.00281784
brown	GO BP term	GO:0034329	cell junction assembly	18	9.87791e-05	0.00312231
brown	GO BP term	GO:0050731	positive regulation of peptidyl-tyrosine phosphorylation	15	0.000100132	0.00314144
brown	GO BP term	GO:0002696	positive regulation of leukocyte activation	22	0.000111151	0.00345977
brown	GO BP term	GO:0006914	autophagy	27	0.000112747	0.00345977
brown	GO BP term	GO:0061919	process utilizing autophagic mechanism	27	0.000112747	0.00345977
brown	GO BP term	GO:0010950	positive regulation of endopeptidase activity	15	0.000118656	0.0036147
brown	GO BP term	GO:0071347	cellular response to interleukin-1	13	0.000123134	0.00372412
brown	GO BP term	GO:0030099	myeloid cell differentiation	26	0.000125362	0.00376443
brown	GO BP term	GO:1990778	protein localization to cell periphery	20	0.000129449	0.0038421
brown	GO BP term	GO:0007043	cell-cell junction assembly	12	0.000129776	0.0038421
brown	GO BP term	GO:2000116	regulation of cysteine-type endopeptidase activity	18	0.000130988	0.00385087
brown	GO BP term	GO:0046638	positive regulation of alpha-beta T cell differentiation	7	0.000134482	0.00387763
brown	GO BP term	GO:0032970	regulation of actin filament-based process	23	0.000134664	0.00387763
brown	GO BP term	GO:0070555	response to interleukin-1	14	0.000134666	0.00387763
brown	GO BP term	GO:0048145	regulation of fibroblast proliferation	10	0.000141954	0.00403468
brown	GO BP term	GO:0032608	interferon-beta production	8	0.000142999	0.00403468
brown	GO BP term	GO:0046637	regulation of alpha-beta T cell differentiation	8	0.000142999	0.00403468
brown	GO BP term	GO:0010810	regulation of cell-substrate adhesion	16	0.000147898	0.0041451
brown	GO BP term	GO:0051132	NK T cell activation	4	0.000149134	0.00415205
brown	GO BP term	GO:0048144	fibroblast proliferation	10	0.000154517	0.00427361
brown	GO BP term	GO:0043536	positive regulation of blood vessel endothelial cell migration	9	0.000158322	0.00432439
brown	GO BP term	GO:0007015	actin filament organization	24	0.00015841	0.00432439
brown	GO BP term	GO:0002064	epithelial cell development	16	0.000163675	0.00443928
brown	GO BP term	GO:0010811	positive regulation of cell-substrate adhesion	11	0.000175423	0.00472742
brown	GO BP term	GO:0050854	regulation of antigen receptor-mediated signaling pathway	8	0.000178593	0.00478219
brown	GO BP term	GO:0010506	regulation of autophagy	20	0.000179979	0.00478882
brown	GO BP term	GO:0050867	positive regulation of cell activation	22	0.00018251	0.00482134
brown	GO BP term	GO:0071354	cellular response to interleukin-6	6	0.000183495	0.00482134
brown	GO BP term	GO:0110053	regulation of actin filament organization	18	0.00018809	0.00491136
brown	GO BP term	GO:0002698	negative regulation of immune effector process	12	0.00019519	0.00506529
brown	GO BP term	GO:1903076	regulation of protein localization to plasma membrane	10	0.000197963	0.0050998
brown	GO BP term	GO:0032233	positive regulation of actin filament bundle assembly	8	0.000198946	0.0050998
brown	GO BP term	GO:0060324	face development	7	0.000200529	0.00510923
brown	GO BP term	GO:0016064	immunoglobulin mediated immune response	12	0.000208449	0.00525536
brown	GO BP term	GO:0035723	interleukin-15-mediated signaling pathway	4	0.000211265	0.00525536
brown	GO BP term	GO:0071350	cellular response to interleukin-15	4	0.000211265	0.00525536
brown	GO BP term	GO:1903054	negative regulation of extracellular matrix organization	4	0.000211265	0.00525536
brown	GO BP term	GO:0019724	B cell mediated immunity	12	0.000222469	0.00550152
brown	GO BP term	GO:0046651	lymphocyte proliferation	20	0.000228547	0.00558022
brown	GO BP term	GO:0002819	regulation of adaptive immune response	16	0.000231011	0.00558022
brown	GO BP term	GO:0010594	regulation of endothelial cell migration	16	0.000231011	0.00558022
brown	GO BP term	GO:0032092	positive regulation of protein binding	10	0.000232288	0.00558022
brown	GO BP term	GO:0032231	regulation of actin filament bundle assembly	10	0.000232288	0.00558022
brown	GO BP term	GO:1902105	regulation of leukocyte differentiation	19	0.000263398	0.00629162
brown	GO BP term	GO:0070663	regulation of leukocyte proliferation	18	0.000265886	0.00631518
brown	GO BP term	GO:2001243	negative regulation of intrinsic apoptotic signaling pathway	10	0.000271467	0.0064115
brown	GO BP term	GO:0032651	regulation of interleukin-1 beta production	9	0.000273605	0.0064259
brown	GO BP term	GO:0045216	cell-cell junction organization	13	0.00028876	0.00664756
brown	GO BP term	GO:0070672	response to interleukin-15	4	0.000290075	0.00664756
brown	GO BP term	GO:0010171	body morphogenesis	7	0.000290564	0.00664756
brown	GO BP term	GO:0070671	response to interleukin-12	7	0.000290564	0.00664756
brown	GO BP term	GO:0043434	response to peptide hormone	24	0.000290949	0.00664756
brown	GO BP term	GO:0046427	positive regulation of JAK-STAT cascade	9	0.0002983	0.00677866
brown	GO BP term	GO:0033619	membrane protein proteolysis	8	0.000300322	0.00678792
brown	GO BP term	GO:0010952	positive regulation of peptidase activity	15	0.000305465	0.00686725
brown	GO BP term	GO:0051492	regulation of stress fiber assembly	9	0.000324809	0.00726329
brown	GO BP term	GO:0002886	regulation of myeloid leukocyte mediated immunity	7	0.000326906	0.0072715
brown	GO BP term	GO:0045765	regulation of angiogenesis	22	0.000335196	0.00741666
brown	GO BP term	GO:0070741	response to interleukin-6	6	0.000339605	0.00743593
brown	GO BP term	GO:0072595	maintenance of protein localization in organelle	6	0.000339605	0.00743593
brown	GO BP term	GO:2001242	regulation of intrinsic apoptotic signaling pathway	13	0.000342194	0.00745381
brown	GO BP term	GO:0051099	positive regulation of binding	14	0.000345029	0.00747681
brown	GO BP term	GO:0007229	integrin-mediated signaling pathway	10	0.000366536	0.00790213
brown	GO BP term	GO:1903037	regulation of leukocyte cell-cell adhesion	21	0.000368878	0.00791206
brown	GO BP term	GO:1904894	positive regulation of STAT cascade	9	0.000383682	0.00817944
brown	GO BP term	GO:0031348	negative regulation of defense response	16	0.000385235	0.00817944
brown	GO BP term	GO:0007259	JAK-STAT cascade	12	0.000389007	0.00821801
brown	GO BP term	GO:0045621	positive regulation of lymphocyte differentiation	10	0.000394207	0.00828623
brown	GO BP term	GO:0045862	positive regulation of proteolysis	22	0.00039754	0.00831472
brown	GO BP term	GO:0042531	positive regulation of tyrosine phosphorylation of STAT protein	8	0.000401219	0.00834322
brown	GO BP term	GO:0051495	positive regulation of cytoskeleton organization	16	0.000402872	0.00834322
brown	GO BP term	GO:0048146	positive regulation of fibroblast proliferation	7	0.000410506	0.00845964
brown	GO BP term	GO:0010632	regulation of epithelial cell migration	18	0.000434795	0.00891648
brown	GO BP term	GO:0051098	regulation of binding	22	0.000439628	0.00894414
brown	GO BP term	GO:0002312	B cell activation involved in immune response	8	0.000440399	0.00894414
brown	GO BP term	GO:0022407	regulation of cell-cell adhesion	25	0.000454103	0.00914786
brown	GO BP term	GO:0002286	T cell activation involved in immune response	10	0.000454782	0.00914786
brown	GO BP term	GO:0032944	regulation of mononuclear cell proliferation	17	0.000460521	0.00921919
brown	GO BP term	GO:0010803	regulation of tumor necrosis factor-mediated signaling pathway	8	0.000482628	0.00961597
brown	GO BP term	GO:0051251	positive regulation of lymphocyte activation	19	0.000489798	0.0096996
brown	GO BP term	GO:0097696	STAT cascade	12	0.00049144	0.0096996
brown	GO BP term	GO:0051056	regulation of small GTPase mediated signal transduction	20	0.000500678	0.00983575
brown	GO BP term	GO:0002703	regulation of leukocyte mediated immunity	18	0.000508725	0.00994734
brown	GO BP term	GO:0043124	negative regulation of I-kappaB kinase/NF-kappaB signaling	6	0.000513298	0.00999029
brown	GO BP term	GO:0050863	regulation of T cell activation	21	0.000539668	0.0104551
brown	GO BP term	GO:0051249	regulation of lymphocyte activation	25	0.000542289	0.0104577
brown	GO BP term	GO:0002449	lymphocyte mediated immunity	22	0.00055328	0.0106045
brown	GO BP term	GO:0051090	regulation of DNA-binding transcription factor activity	25	0.00055836	0.0106045
brown	GO BP term	GO:0002673	regulation of acute inflammatory response	10	0.000559989	0.0106045
brown	GO BP term	GO:0010508	positive regulation of autophagy	10	0.000559989	0.0106045
brown	GO BP term	GO:0032611	interleukin-1 beta production	9	0.000570177	0.010749
brown	GO BP term	GO:0001570	vasculogenesis	8	0.000576937	0.0108279
brown	GO BP term	GO:2000379	positive regulation of reactive oxygen species metabolic process	10	0.00059924	0.0111965
brown	GO BP term	GO:0002825	regulation of T-helper 1 type immune response	5	0.000623949	0.011588
brown	GO BP term	GO:2000377	regulation of reactive oxygen species metabolic process	14	0.000625705	0.011588
brown	GO BP term	GO:1903039	positive regulation of leukocyte cell-cell adhesion	17	0.000662443	0.0122145
brown	GO BP term	GO:0032648	regulation of interferon-beta production	7	0.000695439	0.0126564
brown	GO BP term	GO:0045824	negative regulation of innate immune response	7	0.000695439	0.0126564
brown	GO BP term	GO:0070265	necrotic cell death	7	0.000695439	0.0126564
brown	GO BP term	GO:0045582	positive regulation of T cell differentiation	9	0.000713871	0.0129358
brown	GO BP term	GO:0032680	regulation of tumor necrosis factor production	12	0.000725329	0.0130871
brown	GO BP term	GO:0050663	cytokine secretion	16	0.000733088	0.0131705
brown	GO BP term	GO:0042088	T-helper 1 type immune response	6	0.000749278	0.0134041
brown	GO BP term	GO:0110020	regulation of actomyosin structure organization	9	0.000767858	0.0136783
brown	GO BP term	GO:1904375	regulation of protein localization to cell periphery	10	0.000779702	0.0138307
brown	GO BP term	GO:0042098	T cell proliferation	15	0.000802178	0.0141373
brown	GO BP term	GO:0032640	tumor necrosis factor production	12	0.00080713	0.0141373
brown	GO BP term	GO:0043535	regulation of blood vessel endothelial cell migration	12	0.00080713	0.0141373
brown	GO BP term	GO:0001765	membrane raft assembly	4	0.000820528	0.0141373
brown	GO BP term	GO:0031293	membrane protein intracellular domain proteolysis	4	0.000820528	0.0141373
brown	GO BP term	GO:0032930	positive regulation of superoxide anion generation	4	0.000820528	0.0141373
brown	GO BP term	GO:0033005	positive regulation of mast cell activation	4	0.000820528	0.0141373
brown	GO BP term	GO:0032652	regulation of interleukin-1 production	9	0.000825124	0.0141585
brown	GO BP term	GO:0043281	regulation of cysteine-type endopeptidase activity involved in apoptotic process	15	0.000837188	0.0143071
brown	GO BP term	GO:0002822	regulation of adaptive immune response based on somatic recombination of immune receptors built from immunoglobulin superfamily domains	14	0.000865178	0.0147255
brown	GO BP term	GO:1903555	regulation of tumor necrosis factor superfamily cytokine production	12	0.000896495	0.0151768
brown	GO BP term	GO:0016050	vesicle organization	19	0.000898911	0.0151768
brown	GO BP term	GO:0070830	bicellular tight junction assembly	7	0.000930033	0.0156394
brown	GO BP term	GO:2001056	positive regulation of cysteine-type endopeptidase activity	12	0.00094418	0.0157489
brown	GO BP term	GO:0030038	contractile actin filament bundle assembly	9	0.000950088	0.0157489
brown	GO BP term	GO:0043149	stress fiber assembly	9	0.000950088	0.0157489
brown	GO BP term	GO:0002431	Fc receptor mediated stimulatory signaling pathway	8	0.000952334	0.0157489
brown	GO BP term	GO:0030098	lymphocyte differentiation	20	0.000955276	0.0157489
brown	GO BP term	GO:0002687	positive regulation of leukocyte migration	11	0.000993226	0.0162472
brown	GO BP term	GO:0038061	NIK/NF-kappaB signaling	11	0.000993226	0.0162472
brown	GO BP term	GO:0120192	tight junction assembly	7	0.00102072	0.0166323
brown	GO BP term	GO:0042509	regulation of tyrosine phosphorylation of STAT protein	8	0.00103053	0.0167272
brown	GO BP term	GO:0010634	positive regulation of epithelial cell migration	12	0.0010459	0.0169114
brown	GO BP term	GO:0071706	tumor necrosis factor superfamily cytokine production	12	0.00110008	0.0176517
brown	GO BP term	GO:1902107	positive regulation of leukocyte differentiation	12	0.00110008	0.0176517
brown	GO BP term	GO:0010595	positive regulation of endothelial cell migration	10	0.00113232	0.0180313
brown	GO BP term	GO:1901222	regulation of NIK/NF-kappaB signaling	10	0.00113232	0.0180313
brown	GO BP term	GO:0030947	regulation of vascular endothelial growth factor receptor signaling pathway	5	0.00115081	0.0182566
brown	GO BP term	GO:0032103	positive regulation of response to external stimulus	19	0.00121538	0.0190539
brown	GO BP term	GO:1903707	negative regulation of hemopoiesis	12	0.00121544	0.0190539
brown	GO BP term	GO:0030449	regulation of complement activation	7	0.00122288	0.0190539
brown	GO BP term	GO:0033627	cell adhesion mediated by integrin	7	0.00122288	0.0190539
brown	GO BP term	GO:0050670	regulation of lymphocyte proliferation	16	0.00122373	0.0190539
brown	GO BP term	GO:0006907	pinocytosis	4	0.00124985	0.0191765
brown	GO BP term	GO:0032495	response to muramyl dipeptide	4	0.00124985	0.0191765
brown	GO BP term	GO:0036010	protein localization to endosome	4	0.00124985	0.0191765
brown	GO BP term	GO:0043371	negative regulation of CD4-positive, alpha-beta T cell differentiation	4	0.00124985	0.0191765
brown	GO BP term	GO:1901342	regulation of vasculature development	22	0.00126476	0.0193348
brown	GO BP term	GO:0031032	actomyosin structure organization	13	0.0012697	0.01934
brown	GO BP term	GO:0007260	tyrosine phosphorylation of STAT protein	8	0.00129635	0.0195336
brown	GO BP term	GO:0032760	positive regulation of tumor necrosis factor production	8	0.00129635	0.0195336
brown	GO BP term	GO:0072332	intrinsic apoptotic signaling pathway by p53 class mediator	8	0.00129635	0.0195336
brown	GO BP term	GO:0035722	interleukin-12-mediated signaling pathway	6	0.00131915	0.0197151
brown	GO BP term	GO:0061028	establishment of endothelial barrier	6	0.00131915	0.0197151
brown	GO BP term	GO:0006471	protein ADP-ribosylation	5	0.00132247	0.0197151
brown	GO BP term	GO:0120193	tight junction organization	7	0.00133505	0.0197625
brown	GO BP term	GO:2000257	regulation of protein activation cascade	7	0.00133505	0.0197625
brown	GO BP term	GO:0016575	histone deacetylation	8	0.00139616	0.0205671
brown	GO BP term	GO:0022409	positive regulation of cell-cell adhesion	18	0.00139919	0.0205671
brown	GO BP term	GO:0032623	interleukin-2 production	7	0.00145511	0.0213145
brown	GO BP term	GO:0072001	renal system development	17	0.00149737	0.0217284
brown	GO BP term	GO:1900026	positive regulation of substrate adhesion-dependent cell spreading	5	0.00151229	0.0217284
brown	GO BP term	GO:0002474	antigen processing and presentation of peptide antigen via MHC class I	9	0.0015136	0.0217284
brown	GO BP term	GO:0007035	vacuolar acidification	4	0.00151437	0.0217284
brown	GO BP term	GO:0035455	response to interferon-alpha	4	0.00151437	0.0217284
brown	GO BP term	GO:0043302	positive regulation of leukocyte degranulation	4	0.00151437	0.0217284
brown	GO BP term	GO:0030948	negative regulation of vascular endothelial growth factor receptor signaling pathway	3	0.00153068	0.0217398
brown	GO BP term	GO:0035878	nail development	3	0.00153068	0.0217398
brown	GO BP term	GO:0051133	regulation of NK T cell activation	3	0.00153068	0.0217398
brown	GO BP term	GO:0043902	positive regulation of multi-organism process	12	0.00154832	0.0219162
brown	GO BP term	GO:0002699	positive regulation of immune effector process	17	0.00160495	0.0223591
brown	GO BP term	GO:0030100	regulation of endocytosis	17	0.00160495	0.0223591
brown	GO BP term	GO:0038093	Fc receptor signaling pathway	10	0.00160561	0.0223591
brown	GO BP term	GO:0032612	interleukin-1 production	9	0.00161237	0.0223591
brown	GO BP term	GO:1903557	positive regulation of tumor necrosis factor superfamily cytokine production	8	0.00161404	0.0223591
brown	GO BP term	GO:0042771	intrinsic apoptotic signaling pathway in response to DNA damage by p53 class mediator	6	0.00162215	0.0223591
brown	GO BP term	GO:0071349	cellular response to interleukin-12	6	0.00162215	0.0223591
brown	GO BP term	GO:1900024	regulation of substrate adhesion-dependent cell spreading	6	0.00162215	0.0223591
brown	GO BP term	GO:0046425	regulation of JAK-STAT cascade	10	0.00169817	0.0233304
brown	GO BP term	GO:0045454	cell redox homeostasis	7	0.00172036	0.0234203
brown	GO BP term	GO:0048255	mRNA stabilization	5	0.00172142	0.0234203
brown	GO BP term	GO:0051452	intracellular pH reduction	5	0.00172142	0.0234203
brown	GO BP term	GO:0035690	cellular response to drug	20	0.00177927	0.0240858
brown	GO BP term	GO:0060538	skeletal muscle organ development	12	0.0017818	0.0240858
brown	GO BP term	GO:0002827	positive regulation of T-helper 1 type immune response	4	0.0018155	0.0243845
brown	GO BP term	GO:0050857	positive regulation of antigen receptor-mediated signaling pathway	4	0.0018155	0.0243845
brown	GO BP term	GO:0045580	regulation of T cell differentiation	11	0.00186991	0.0250353
brown	GO BP term	GO:0051091	positive regulation of DNA-binding transcription factor activity	17	0.00190273	0.0253939
brown	GO BP term	GO:1903510	mucopolysaccharide metabolic process	9	0.00194006	0.0257924
brown	GO BP term	GO:0030224	monocyte differentiation	5	0.00195099	0.0257924
brown	GO BP term	GO:1903131	mononuclear cell differentiation	5	0.00195099	0.0257924
brown	GO BP term	GO:0002824	positive regulation of adaptive immune response based on somatic recombination of immune receptors built from immunoglobulin superfamily domains	11	0.00196496	0.0258956
brown	GO BP term	GO:0042590	antigen processing and presentation of exogenous peptide antigen via MHC class I	8	0.00199042	0.0261491
brown	GO BP term	GO:0031345	negative regulation of cell projection organization	12	0.00204347	0.0266511
brown	GO BP term	GO:0030330	DNA damage response, signal transduction by p53 class mediator	9	0.00206039	0.0266511
brown	GO BP term	GO:0001821	histamine secretion	3	0.00206667	0.0266511
brown	GO BP term	GO:0007256	activation of JNKK activity	3	0.00206667	0.0266511
brown	GO BP term	GO:0010940	positive regulation of necrotic cell death	3	0.00206667	0.0266511
brown	GO BP term	GO:0098792	xenophagy	3	0.00206667	0.0266511
brown	GO BP term	GO:1904892	regulation of STAT cascade	10	0.00211256	0.0271596
brown	GO BP term	GO:0051651	maintenance of location in cell	8	0.00213015	0.0273023
brown	GO BP term	GO:0032928	regulation of superoxide anion generation	4	0.00215571	0.0273418
brown	GO BP term	GO:0042832	defense response to protozoan	4	0.00215571	0.0273418
brown	GO BP term	GO:0060396	growth hormone receptor signaling pathway	4	0.00215571	0.0273418
brown	GO BP term	GO:0002831	regulation of response to biotic stimulus	11	0.00216686	0.0273418
brown	GO BP term	GO:0003170	heart valve development	6	0.00217225	0.0273418
brown	GO BP term	GO:0051496	positive regulation of stress fiber assembly	6	0.00217225	0.0273418
brown	GO BP term	GO:0045851	pH reduction	5	0.00220215	0.0276353
brown	GO BP term	GO:0050870	positive regulation of T cell activation	15	0.00223952	0.0280207
brown	GO BP term	GO:1904019	epithelial cell apoptotic process	9	0.00231887	0.0289013
brown	GO BP term	GO:0061138	morphogenesis of a branching epithelium	13	0.00232365	0.0289013
brown	GO BP term	GO:0002573	myeloid leukocyte differentiation	14	0.00234761	0.0289546
brown	GO BP term	GO:0042113	B cell activation	14	0.00234761	0.0289546
brown	GO BP term	GO:0001885	endothelial cell development	7	0.00236238	0.0289546
brown	GO BP term	GO:0032507	maintenance of protein location in cell	7	0.00236238	0.0289546
brown	GO BP term	GO:0043367	CD4-positive, alpha-beta T cell differentiation	7	0.00236238	0.0289546
brown	GO BP term	GO:1903321	negative regulation of protein modification by small protein conjugation or removal	8	0.0024327	0.0297298
brown	GO BP term	GO:0045619	regulation of lymphocyte differentiation	12	0.0024405	0.0297387
brown	GO BP term	GO:0042770	signal transduction in response to DNA damage	10	0.00247388	0.0299119
brown	GO BP term	GO:0007162	negative regulation of cell adhesion	17	0.00247511	0.0299119
brown	GO BP term	GO:0032728	positive regulation of interferon-beta production	5	0.00247605	0.0299119
brown	GO BP term	GO:0002821	positive regulation of adaptive immune response	11	0.002501	0.0301267
brown	GO BP term	GO:0010001	glial cell differentiation	13	0.00252055	0.0302195
brown	GO BP term	GO:0001562	response to protozoan	4	0.00253746	0.0302195
brown	GO BP term	GO:0046639	negative regulation of alpha-beta T cell differentiation	4	0.00253746	0.0302195
brown	GO BP term	GO:0071378	cellular response to growth hormone stimulus	4	0.00253746	0.0302195
brown	GO BP term	GO:0031663	lipopolysaccharide-mediated signaling pathway	7	0.00254847	0.0302649
brown	GO BP term	GO:1902106	negative regulation of leukocyte differentiation	9	0.00260248	0.0308193
brown	GO BP term	GO:0051017	actin filament bundle assembly	11	0.00262121	0.0309539
brown	GO BP term	GO:0051608	histamine transport	3	0.00270585	0.0316863
brown	GO BP term	GO:0070486	leukocyte aggregation	3	0.00270585	0.0316863
brown	GO BP term	GO:1902969	mitotic DNA replication	3	0.00270585	0.0316863
brown	GO BP term	GO:0016601	Rac protein signal transduction	5	0.00277386	0.0323028
brown	GO BP term	GO:0046633	alpha-beta T cell proliferation	5	0.00277386	0.0323028
brown	GO BP term	GO:0010721	negative regulation of cell development	18	0.00281575	0.0327001
brown	GO BP term	GO:0042093	T-helper cell differentiation	6	0.00285246	0.0330352
brown	GO BP term	GO:0050768	negative regulation of neurogenesis	16	0.00286149	0.0330487
brown	GO BP term	GO:0008360	regulation of cell shape	11	0.00287563	0.033121
brown	GO BP term	GO:0031532	actin cytoskeleton reorganization	8	0.00294847	0.0335772
brown	GO BP term	GO:0002433	immune response-regulating cell surface receptor signaling pathway involved in phagocytosis	7	0.00295426	0.0335772
brown	GO BP term	GO:0038096	Fc-gamma receptor signaling pathway involved in phagocytosis	7	0.00295426	0.0335772
brown	GO BP term	GO:0002335	mature B cell differentiation	4	0.00296316	0.0335772
brown	GO BP term	GO:1904385	cellular response to angiotensin	4	0.00296316	0.0335772
brown	GO BP term	GO:2001185	regulation of CD8-positive, alpha-beta T cell activation	4	0.00296316	0.0335772
brown	GO BP term	GO:0032147	activation of protein kinase activity	18	0.00298939	0.0337833
brown	GO BP term	GO:0050856	regulation of T cell receptor signaling pathway	5	0.00309675	0.0349027
brown	GO BP term	GO:0050853	B cell receptor signaling pathway	6	0.00311119	0.0349718
brown	GO BP term	GO:0061572	actin filament bundle organization	11	0.00314958	0.0353089
brown	GO BP term	GO:0007160	cell-matrix adhesion	14	0.00316357	0.0353714
brown	GO BP term	GO:0002753	cytoplasmic pattern recognition receptor signaling pathway	7	0.00317483	0.0354031
brown	GO BP term	GO:1903708	positive regulation of hemopoiesis	13	0.00332026	0.0369269
brown	GO BP term	GO:0002294	CD4-positive, alpha-beta T cell differentiation involved in immune response	6	0.00338703	0.0371395
brown	GO BP term	GO:0031331	positive regulation of cellular catabolic process	19	0.00340208	0.0371395
brown	GO BP term	GO:0030206	chondroitin sulfate biosynthetic process	4	0.00343517	0.0371395
brown	GO BP term	GO:0060330	regulation of response to interferon-gamma	4	0.00343517	0.0371395
brown	GO BP term	GO:0060334	regulation of interferon-gamma-mediated signaling pathway	4	0.00343517	0.0371395
brown	GO BP term	GO:0007519	skeletal muscle tissue development	11	0.00344412	0.0371395
brown	GO BP term	GO:0045581	negative regulation of T cell differentiation	5	0.00344586	0.0371395
brown	GO BP term	GO:0033008	positive regulation of mast cell activation involved in immune response	3	0.00345422	0.0371395
brown	GO BP term	GO:0035020	regulation of Rac protein signal transduction	3	0.00345422	0.0371395
brown	GO BP term	GO:0035563	positive regulation of chromatin binding	3	0.00345422	0.0371395
brown	GO BP term	GO:0043306	positive regulation of mast cell degranulation	3	0.00345422	0.0371395
brown	GO BP term	GO:0060397	JAK-STAT cascade involved in growth hormone signaling pathway	3	0.00345422	0.0371395
brown	GO BP term	GO:2001044	regulation of integrin-mediated signaling pathway	3	0.00345422	0.0371395
brown	GO BP term	GO:0006919	activation of cysteine-type endopeptidase activity involved in apoptotic process	8	0.00354567	0.0380255
brown	GO BP term	GO:0070371	ERK1 and ERK2 cascade	19	0.00359649	0.0384724
brown	GO BP term	GO:0038094	Fc-gamma receptor signaling pathway	7	0.00365346	0.0389826
brown	GO BP term	GO:0002287	alpha-beta T cell activation involved in immune response	6	0.00368065	0.0390744
brown	GO BP term	GO:0002293	alpha-beta T cell differentiation involved in immune response	6	0.00368065	0.0390744
brown	GO BP term	GO:0032535	regulation of cellular component size	19	0.00380005	0.0398741
brown	GO BP term	GO:0019882	antigen processing and presentation	17	0.00382092	0.0398741
brown	GO BP term	GO:0032456	endocytic recycling	5	0.00382237	0.0398741
brown	GO BP term	GO:0043489	RNA stabilization	5	0.00382237	0.0398741
brown	GO BP term	GO:0070266	necroptotic process	5	0.00382237	0.0398741
brown	GO BP term	GO:0090322	regulation of superoxide metabolic process	5	0.00382237	0.0398741
brown	GO BP term	GO:1902373	negative regulation of mRNA catabolic process	5	0.00382237	0.0398741
brown	GO BP term	GO:0031063	regulation of histone deacetylation	4	0.0039558	0.0410622
brown	GO BP term	GO:1902895	positive regulation of pri-miRNA transcription by RNA polymerase II	4	0.0039558	0.0410622
brown	GO BP term	GO:1903902	positive regulation of viral life cycle	6	0.00399275	0.0413437
brown	GO BP term	GO:0001763	morphogenesis of a branching structure	13	0.00400911	0.041411
brown	GO BP term	GO:0032868	response to insulin	15	0.00402801	0.0415043
brown	GO BP term	GO:0003158	endothelium development	10	0.00404963	0.0415235
brown	GO BP term	GO:0043280	positive regulation of cysteine-type endopeptidase activity involved in apoptotic process	10	0.00404963	0.0415235
brown	GO BP term	GO:0070423	nucleotide-binding oligomerization domain containing signaling pathway	5	0.00422743	0.0431882
brown	GO BP term	GO:0006476	protein deacetylation	8	0.00423252	0.0431882
brown	GO BP term	GO:0045637	regulation of myeloid cell differentiation	15	0.00429928	0.0432128
brown	GO BP term	GO:0043393	regulation of protein binding	13	0.00431511	0.0432128
brown	GO BP term	GO:0002246	wound healing involved in inflammatory response	3	0.00431717	0.0432128
brown	GO BP term	GO:0043374	CD8-positive, alpha-beta T cell differentiation	3	0.00431717	0.0432128
brown	GO BP term	GO:0045064	T-helper 2 cell differentiation	3	0.00431717	0.0432128
brown	GO BP term	GO:0045651	positive regulation of macrophage differentiation	3	0.00431717	0.0432128
brown	GO BP term	GO:0070935	3'-UTR-mediated mRNA stabilization	3	0.00431717	0.0432128
brown	GO BP term	GO:1902855	regulation of non-motile cilium assembly	3	0.00431717	0.0432128
brown	GO BP term	GO:0051235	maintenance of location	17	0.00442818	0.0442187
brown	GO BP term	GO:0045446	endothelial cell differentiation	9	0.00445782	0.0444092
brown	GO BP term	GO:0031579	membrane raft organization	4	0.00452729	0.0447829
brown	GO BP term	GO:0050855	regulation of B cell receptor signaling pathway	4	0.00452729	0.0447829
brown	GO BP term	GO:1990776	response to angiotensin	4	0.00452729	0.0447829
brown	GO BP term	GO:0010463	mesenchymal cell proliferation	5	0.0046622	0.0457074
brown	GO BP term	GO:0035872	nucleotide-binding domain, leucine rich repeat containing receptor signaling pathway	5	0.0046622	0.0457074
brown	GO BP term	GO:1903053	regulation of extracellular matrix organization	5	0.0046622	0.0457074
brown	GO BP term	GO:0000768	syncytium formation by plasma membrane fusion	6	0.00467511	0.0457074
brown	GO BP term	GO:0140253	cell-cell fusion	6	0.00467511	0.0457074
brown	GO BP term	GO:0006900	vesicle budding from membrane	8	0.00474441	0.0462773
brown	GO BP term	GO:0048013	ephrin receptor signaling pathway	7	0.00477319	0.0464503
brown	GO BP term	GO:0001655	urogenital system development	17	0.00482909	0.0468857
brown	GO BP term	GO:0010977	negative regulation of neuron projection development	10	0.00486698	0.0471447
brown	GO BP term	GO:0070372	regulation of ERK1 and ERK2 cascade	18	0.00499203	0.0482448
brown	GO BP term	GO:1903078	positive regulation of protein localization to plasma membrane	6	0.00504675	0.0486618
brown	GO BP term	GO:0022408	negative regulation of cell-cell adhesion	12	0.00507708	0.0488422
brown	GO BP term	GO:0014015	positive regulation of gliogenesis	7	0.0050896	0.0488509
brown	GO BP term	GO:1904036	negative regulation of epithelial cell apoptotic process	5	0.00512782	0.0491056
brown	GO BP term	GO:0030217	T cell differentiation	14	0.00514248	0.0491341
brown	GO BP term	GO:0050868	negative regulation of T cell activation	9	0.00517866	0.0493435
brown	GO BP term	GO:0051961	negative regulation of nervous system development	16	0.00518788	0.0493435
brown	KEGG pathway	hsa05169	Epstein-Barr virus infection	41	9.47172e-12	2.39634e-09
brown	KEGG pathway	hsa05163	Human cytomegalovirus infection	39	5.8909e-10	7.45198e-08
brown	KEGG pathway	hsa05133	Pertussis	21	1.25923e-09	8.82868e-08
brown	KEGG pathway	hsa05203	Viral carcinogenesis	34	1.39584e-09	8.82868e-08
brown	KEGG pathway	hsa04670	Leukocyte transendothelial migration	23	9.78484e-08	4.95113e-06
brown	KEGG pathway	hsa05220	Chronic myeloid leukemia	19	1.48715e-07	6.2708e-06
brown	KEGG pathway	hsa05166	Human T-cell leukemia virus 1 infection	36	2.37022e-07	8.10627e-06
brown	KEGG pathway	hsa04630	JAK-STAT signaling pathway	26	2.56325e-07	8.10627e-06
brown	KEGG pathway	hsa05170	Human immunodeficiency virus 1 infection	32	3.18183e-07	8.94448e-06
brown	KEGG pathway	hsa04064	NF-kappa B signaling pathway	19	1.27727e-06	2.93771e-05
brown	KEGG pathway	hsa04666	Fc gamma R-mediated phagocytosis	19	1.27727e-06	2.93771e-05
brown	KEGG pathway	hsa04810	Regulation of actin cytoskeleton	31	2.44033e-06	5.14503e-05
brown	KEGG pathway	hsa04530	Tight junction	25	3.52822e-06	6.81235e-05
brown	KEGG pathway	hsa04621	NOD-like receptor signaling pathway	25	3.80153e-06	6.81235e-05
brown	KEGG pathway	hsa05221	Acute myeloid leukemia	15	4.03894e-06	6.81235e-05
brown	KEGG pathway	hsa04145	Phagosome	26	7.20547e-06	0.000113937
brown	KEGG pathway	hsa05167	Kaposi sarcoma-associated herpesvirus infection	27	8.00803e-06	0.000118436
brown	KEGG pathway	hsa05131	Shigellosis	15	8.42629e-06	0.000118436
brown	KEGG pathway	hsa05416	Viral myocarditis	17	9.59922e-06	0.000127821
brown	KEGG pathway	hsa05206	MicroRNAs in cancer	23	3.83144e-05	0.000484678
brown	KEGG pathway	hsa04650	Natural killer cell mediated cytotoxicity	20	4.2534e-05	0.000512433
brown	KEGG pathway	hsa04610	Complement and coagulation cascades	14	4.59407e-05	0.000528318
brown	KEGG pathway	hsa04360	Axon guidance	24	6.75599e-05	0.000743159
brown	KEGG pathway	hsa04014	Ras signaling pathway	28	7.45861e-05	0.000786262
brown	KEGG pathway	hsa05165	Human papillomavirus infection	35	0.000135154	0.00136776
brown	KEGG pathway	hsa05160	Hepatitis C	21	0.000147254	0.00143289
brown	KEGG pathway	hsa04668	TNF signaling pathway	16	0.000199645	0.00187075
brown	KEGG pathway	hsa04010	MAPK signaling pathway	32	0.000237814	0.00214882
brown	KEGG pathway	hsa04514	Cell adhesion molecules (CAMs)	22	0.000258599	0.00225605
brown	KEGG pathway	hsa04218	Cellular senescence	22	0.000416975	0.00351649
brown	KEGG pathway	hsa04392	Hippo signaling pathway - multiple species	7	0.000521167	0.00425339
brown	KEGG pathway	hsa04012	ErbB signaling pathway	14	0.000675534	0.00534094
brown	KEGG pathway	hsa04380	Osteoclast differentiation	16	0.00106573	0.00817062
brown	KEGG pathway	hsa05132	Salmonella infection	13	0.00119443	0.00888795
brown	KEGG pathway	hsa04611	Platelet activation	16	0.00134635	0.00955518
brown	KEGG pathway	hsa04210	Apoptosis	17	0.00138824	0.00955518
brown	KEGG pathway	hsa04115	p53 signaling pathway	11	0.0014309	0.00955518
brown	KEGG pathway	hsa05130	Pathogenic Escherichia coli infection	10	0.00143517	0.00955518
brown	KEGG pathway	hsa05162	Measles	17	0.00154584	0.0100282
brown	KEGG pathway	hsa04933	AGE-RAGE signaling pathway in diabetic complications	15	0.00162261	0.010263
brown	KEGG pathway	hsa05161	Hepatitis B	19	0.00187497	0.0115609
brown	KEGG pathway	hsa05205	Proteoglycans in cancer	23	0.0019192	0.0115609
brown	KEGG pathway	hsa05100	Bacterial invasion of epithelial cells	12	0.00196736	0.0115754
brown	KEGG pathway	hsa05120	Epithelial cell signaling in Helicobacter pylori infection	11	0.00210854	0.0121241
brown	KEGG pathway	hsa04640	Hematopoietic cell lineage	15	0.00228795	0.0128634
brown	KEGG pathway	hsa05212	Pancreatic cancer	12	0.00241609	0.0132885
brown	KEGG pathway	hsa05164	Influenza A	20	0.00249708	0.0134417
brown	KEGG pathway	hsa04144	Endocytosis	25	0.00268841	0.013983
brown	KEGG pathway	hsa05418	Fluid shear stress and atherosclerosis	17	0.00270817	0.013983
brown	KEGG pathway	hsa05222	Small cell lung cancer	13	0.00280044	0.0141702
brown	KEGG pathway	hsa05330	Allograft rejection	10	0.00376618	0.0186832
brown	KEGG pathway	hsa04060	Cytokine-cytokine receptor interaction	26	0.00404991	0.0197044
brown	KEGG pathway	hsa04625	C-type lectin receptor signaling pathway	13	0.0044628	0.0213036
brown	KEGG pathway	hsa04130	SNARE interactions in vesicular transport	6	0.00491077	0.0229152
brown	KEGG pathway	hsa00480	Glutathione metabolism	9	0.00501248	0.0229152
brown	KEGG pathway	hsa04015	Rap1 signaling pathway	21	0.00507213	0.0229152
brown	KEGG pathway	hsa04612	Antigen processing and presentation	14	0.0055639	0.0244984
brown	KEGG pathway	hsa04062	Chemokine signaling pathway	20	0.00561625	0.0244984
brown	KEGG pathway	hsa05219	Bladder cancer	8	0.00612475	0.0262638
brown	KEGG pathway	hsa05202	Transcriptional misregulation in cancer	18	0.00684684	0.0288708
brown	KEGG pathway	hsa04662	B cell receptor signaling pathway	10	0.00697078	0.0289116
brown	KEGG pathway	hsa05210	Colorectal cancer	12	0.00756383	0.0308653
brown	KEGG pathway	hsa05223	Non-small cell lung cancer	10	0.00790815	0.0317581
brown	KEGG pathway	hsa05150	Staphylococcus aureus infection	11	0.00827942	0.0327296
brown	KEGG pathway	hsa04510	Focal adhesion	21	0.00892623	0.0347436
brown	KEGG pathway	hsa04620	Toll-like receptor signaling pathway	12	0.00932719	0.0353063
brown	KEGG pathway	hsa04217	Necroptosis	16	0.0093499	0.0353063
brown	KEGG pathway	hsa03060	Protein export	5	0.0102344	0.0380778
brown	KEGG pathway	hsa04917	Prolactin signaling pathway	10	0.0113094	0.0414679
brown	KEGG pathway	hsa05320	Autoimmune thyroid disease	10	0.01197	0.0432628
brown	KEGG pathway	hsa05110	Vibrio cholerae infection	8	0.0128606	0.0458272
brown	KEGG pathway	hsa04216	Ferroptosis	7	0.0130571	0.0458811
brown	KEGG pathway	hsa04110	Cell cycle	14	0.013293	0.0460703
cyan	GO BP term	GO:0006614	SRP-dependent cotranslational protein targeting to membrane	25	6.75701e-48	3.56094e-45
cyan	GO BP term	GO:0006613	cotranslational protein targeting to membrane	25	1.66591e-47	4.38969e-45
cyan	GO BP term	GO:0045047	protein targeting to ER	25	1.13358e-46	1.99132e-44
cyan	GO BP term	GO:0072599	establishment of protein localization to endoplasmic reticulum	25	2.54008e-46	3.34655e-44
cyan	GO BP term	GO:0000184	nuclear-transcribed mRNA catabolic process, nonsense-mediated decay	25	1.18343e-45	1.24733e-43
cyan	GO BP term	GO:0070972	protein localization to endoplasmic reticulum	25	2.33758e-44	2.05318e-42
cyan	GO BP term	GO:0006612	protein targeting to membrane	26	3.73702e-43	2.81344e-41
cyan	GO BP term	GO:0006413	translational initiation	25	9.80461e-41	6.45879e-39
cyan	GO BP term	GO:0000956	nuclear-transcribed mRNA catabolic process	25	2.9715e-39	1.73998e-37
cyan	GO BP term	GO:0090150	establishment of protein localization to membrane	26	1.40701e-37	7.41496e-36
cyan	GO BP term	GO:0006402	mRNA catabolic process	25	3.267e-35	1.56519e-33
cyan	GO BP term	GO:0006605	protein targeting	26	1.84889e-34	8.11972e-33
cyan	GO BP term	GO:0006401	RNA catabolic process	25	3.01009e-34	1.22024e-32
cyan	GO BP term	GO:0002181	cytoplasmic translation	10	1.47662e-15	5.55842e-14
cyan	GO BP term	GO:0042254	ribosome biogenesis	13	6.4704e-15	2.27327e-13
cyan	GO BP term	GO:0042273	ribosomal large subunit biogenesis	7	9.15628e-11	3.01585e-09
cyan	GO BP term	GO:0006364	rRNA processing	9	3.06863e-10	9.51275e-09
cyan	GO BP term	GO:0016072	rRNA metabolic process	9	1.17708e-09	3.44622e-08
cyan	GO BP term	GO:0042255	ribosome assembly	6	1.52625e-09	4.23334e-08
cyan	GO BP term	GO:0000027	ribosomal large subunit assembly	5	3.2286e-09	8.50736e-08
cyan	GO BP term	GO:0034470	ncRNA processing	9	5.61187e-08	1.40831e-06
cyan	GO BP term	GO:0042274	ribosomal small subunit biogenesis	5	1.84393e-07	4.41704e-06
cyan	GO BP term	GO:0051444	negative regulation of ubiquitin-protein transferase activity	3	3.23392e-06	7.40989e-05
cyan	GO BP term	GO:2001244	positive regulation of intrinsic apoptotic signaling pathway	4	3.95879e-06	8.69285e-05
cyan	GO BP term	GO:1901798	positive regulation of signal transduction by p53 class mediator	3	7.63154e-06	0.000160873
cyan	GO BP term	GO:1904666	regulation of ubiquitin protein ligase activity	3	8.82522e-06	0.00017888
cyan	GO BP term	GO:0022618	ribonucleoprotein complex assembly	6	1.76974e-05	0.000345427
cyan	GO BP term	GO:0031397	negative regulation of protein ubiquitination	4	1.90922e-05	0.000359343
cyan	GO BP term	GO:0071826	ribonucleoprotein complex subunit organization	6	2.28652e-05	0.000415515
cyan	GO BP term	GO:1903321	negative regulation of protein modification by small protein conjugation or removal	4	2.94733e-05	0.000517748
cyan	GO BP term	GO:0000462	maturation of SSU-rRNA from tricistronic rRNA transcript (SSU-rRNA, 5.8S rRNA, LSU-rRNA)	3	4.73642e-05	0.000805191
cyan	GO BP term	GO:0030490	maturation of SSU-rRNA	3	9.58749e-05	0.00157894
cyan	GO BP term	GO:0051438	regulation of ubiquitin-protein transferase activity	3	0.00014413	0.00230171
cyan	GO BP term	GO:2000059	negative regulation of ubiquitin-dependent protein catabolic process	3	0.000196212	0.00304129
cyan	GO BP term	GO:2001242	regulation of intrinsic apoptotic signaling pathway	4	0.000288762	0.00434793
cyan	GO BP term	GO:2001235	positive regulation of apoptotic signaling pathway	4	0.000364935	0.00534225
cyan	GO BP term	GO:0000028	ribosomal small subunit assembly	2	0.000394777	0.00562291
cyan	GO BP term	GO:1903051	negative regulation of proteolysis involved in cellular protein catabolic process	3	0.000504439	0.00699577
cyan	GO BP term	GO:0031396	regulation of protein ubiquitination	4	0.000644716	0.00871193
cyan	GO BP term	GO:1903363	negative regulation of cellular protein catabolic process	3	0.000767716	0.0101147
cyan	GO BP term	GO:1903320	regulation of protein modification by small protein conjugation or removal	4	0.000988458	0.0127053
cyan	GO BP term	GO:0006417	regulation of translation	5	0.00145831	0.0182983
cyan	GO BP term	GO:1902253	regulation of intrinsic apoptotic signaling pathway by p53 class mediator	2	0.00170286	0.0208699
cyan	GO BP term	GO:0042769	DNA damage response, detection of DNA damage	2	0.00225406	0.0269975
cyan	GO BP term	GO:1901796	regulation of signal transduction by p53 class mediator	3	0.0023433	0.0274427
cyan	GO BP term	GO:0042177	negative regulation of protein catabolic process	3	0.00268322	0.0307404
cyan	GO BP term	GO:0097193	intrinsic apoptotic signaling pathway	4	0.00282849	0.0317152
cyan	GO BP term	GO:0043628	ncRNA 3'-end processing	2	0.00372261	0.0408712
cyan	GO BP term	GO:2000058	regulation of ubiquitin-dependent protein catabolic process	3	0.00413952	0.0445209
cyan	KEGG pathway	hsa03010	Ribosome	40	1.03356e-66	9.30205e-66
green	GO BP term	GO:0044282	small molecule catabolic process	49	6.08389e-24	2.44755e-20
green	GO BP term	GO:0016054	organic acid catabolic process	36	3.66928e-20	4.92051e-17
green	GO BP term	GO:0046395	carboxylic acid catabolic process	36	3.66928e-20	4.92051e-17
green	GO BP term	GO:0006635	fatty acid beta-oxidation	18	9.29261e-16	9.34604e-13
green	GO BP term	GO:0072329	monocarboxylic acid catabolic process	22	6.60075e-15	5.31096e-12
green	GO BP term	GO:0009062	fatty acid catabolic process	20	2.1052e-14	1.41154e-11
green	GO BP term	GO:0006631	fatty acid metabolic process	34	7.00434e-14	4.0255e-11
green	GO BP term	GO:0019395	fatty acid oxidation	18	2.83468e-13	1.42549e-10
green	GO BP term	GO:0034440	lipid oxidation	18	4.02057e-13	1.7972e-10
green	GO BP term	GO:0044242	cellular lipid catabolic process	25	6.46022e-13	2.59895e-10
green	GO BP term	GO:0030258	lipid modification	26	6.14969e-11	2.24911e-08
green	GO BP term	GO:0016042	lipid catabolic process	27	3.40137e-10	1.14031e-07
green	GO BP term	GO:0007409	axonogenesis	30	2.15668e-09	6.28835e-07
green	GO BP term	GO:0010001	glial cell differentiation	20	2.18834e-09	6.28835e-07
green	GO BP term	GO:0042063	gliogenesis	23	9.6e-09	2.57472e-06
green	GO BP term	GO:0008589	regulation of smoothened signaling pathway	12	3.30477e-08	8.30944e-06
green	GO BP term	GO:0007411	axon guidance	20	8.55365e-08	2.0242e-05
green	GO BP term	GO:0097485	neuron projection guidance	20	9.09388e-08	2.03248e-05
green	GO BP term	GO:1901606	alpha-amino acid catabolic process	13	1.11129e-07	2.35301e-05
green	GO BP term	GO:0042133	neurotransmitter metabolic process	16	1.69356e-07	3.40659e-05
green	GO BP term	GO:0006577	amino-acid betaine metabolic process	6	3.3595e-07	6.43583e-05
green	GO BP term	GO:1901605	alpha-amino acid metabolic process	18	3.74056e-07	6.57271e-05
green	GO BP term	GO:0097164	ammonium ion metabolic process	17	3.7577e-07	6.57271e-05
green	GO BP term	GO:0098727	maintenance of cell number	15	4.53471e-07	7.6013e-05
green	GO BP term	GO:0009063	cellular amino acid catabolic process	13	6.39994e-07	0.000102988
green	GO BP term	GO:0001654	eye development	22	1.77969e-06	0.000275373
green	GO BP term	GO:0150063	visual system development	22	1.85758e-06	0.00027678
green	GO BP term	GO:0045879	negative regulation of smoothened signaling pathway	7	2.00716e-06	0.000280746
green	GO BP term	GO:0019827	stem cell population maintenance	14	2.02377e-06	0.000280746
green	GO BP term	GO:0043010	camera-type eye development	20	2.44185e-06	0.000327452
green	GO BP term	GO:0048880	sensory system development	22	3.06842e-06	0.000398201
green	GO BP term	GO:0048708	astrocyte differentiation	10	3.23597e-06	0.000406822
green	GO BP term	GO:0009064	glutamine family amino acid metabolic process	10	3.59862e-06	0.000438704
green	GO BP term	GO:0007517	muscle organ development	23	3.88359e-06	0.00045952
green	GO BP term	GO:0006091	generation of precursor metabolites and energy	25	4.02105e-06	0.000462191
green	GO BP term	GO:0035019	somatic stem cell population maintenance	9	4.34144e-06	0.000485156
green	GO BP term	GO:0046394	carboxylic acid biosynthetic process	23	4.69615e-06	0.000510611
green	GO BP term	GO:0016053	organic acid biosynthetic process	23	4.87615e-06	0.000511749
green	GO BP term	GO:0030900	forebrain development	22	4.96102e-06	0.000511749
green	GO BP term	GO:2000377	regulation of reactive oxygen species metabolic process	15	5.69095e-06	0.000565471
green	GO BP term	GO:0060041	retina development in camera-type eye	13	5.76294e-06	0.000565471
green	GO BP term	GO:0001708	cell fate specification	10	5.99098e-06	0.00057385
green	GO BP term	GO:0007224	smoothened signaling pathway	12	6.43366e-06	0.000601922
green	GO BP term	GO:0001505	regulation of neurotransmitter levels	21	9.33846e-06	0.000826194
green	GO BP term	GO:0009953	dorsal/ventral pattern formation	10	9.65228e-06	0.000826194
green	GO BP term	GO:0022404	molting cycle process	10	9.65228e-06	0.000826194
green	GO BP term	GO:0022405	hair cycle process	10	9.65228e-06	0.000826194
green	GO BP term	GO:0008360	regulation of cell shape	13	1.12386e-05	0.000941935
green	GO BP term	GO:0061351	neural precursor cell proliferation	12	1.33016e-05	0.00109209
green	GO BP term	GO:2000378	negative regulation of reactive oxygen species metabolic process	8	1.63339e-05	0.00131423
green	GO BP term	GO:0072330	monocarboxylic acid biosynthetic process	18	1.72868e-05	0.00136363
green	GO BP term	GO:0051961	negative regulation of nervous system development	18	1.8813e-05	0.00145548
green	GO BP term	GO:0006066	alcohol metabolic process	20	2.04074e-05	0.00154904
green	GO BP term	GO:0035265	organ growth	14	2.27021e-05	0.00169131
green	GO BP term	GO:2000177	regulation of neural precursor cell proliferation	9	2.38626e-05	0.00174544
green	GO BP term	GO:0050678	regulation of epithelial cell proliferation	20	2.64521e-05	0.0019003
green	GO BP term	GO:0060537	muscle tissue development	21	2.70685e-05	0.00191047
green	GO BP term	GO:0016999	antibiotic metabolic process	12	2.75724e-05	0.00191248
green	GO BP term	GO:0016055	Wnt signaling pathway	23	3.02919e-05	0.00204396
green	GO BP term	GO:0033539	fatty acid beta-oxidation using acyl-CoA dehydrogenase	4	3.0484e-05	0.00204396
green	GO BP term	GO:0198738	cell-cell signaling by wnt	23	3.22622e-05	0.00212772
green	GO BP term	GO:0009065	glutamine family amino acid catabolic process	6	3.35349e-05	0.00217598
green	GO BP term	GO:0030278	regulation of ossification	14	3.64313e-05	0.0022964
green	GO BP term	GO:0021513	spinal cord dorsal/ventral patterning	5	3.71031e-05	0.0022964
green	GO BP term	GO:2000738	positive regulation of stem cell differentiation	5	3.71031e-05	0.0022964
green	GO BP term	GO:0032330	regulation of chondrocyte differentiation	7	3.78253e-05	0.00230562
green	GO BP term	GO:0072593	reactive oxygen species metabolic process	17	4.21037e-05	0.0025157
green	GO BP term	GO:2000179	positive regulation of neural precursor cell proliferation	7	4.29164e-05	0.0025157
green	GO BP term	GO:0022612	gland morphogenesis	11	4.31477e-05	0.0025157
green	GO BP term	GO:0021537	telencephalon development	16	4.44045e-05	0.00255199
green	GO BP term	GO:0001942	hair follicle development	9	4.86751e-05	0.00275802
green	GO BP term	GO:0021782	glial cell development	10	4.98689e-05	0.00278642
green	GO BP term	GO:0045165	cell fate commitment	16	5.73209e-05	0.00303781
green	GO BP term	GO:0009310	amine catabolic process	5	5.81436e-05	0.00303781
green	GO BP term	GO:0021511	spinal cord patterning	5	5.81436e-05	0.00303781
green	GO BP term	GO:0042135	neurotransmitter catabolic process	5	5.81436e-05	0.00303781
green	GO BP term	GO:0048103	somatic stem cell division	5	5.81436e-05	0.00303781
green	GO BP term	GO:0001503	ossification	20	5.92049e-05	0.00305361
green	GO BP term	GO:0098773	skin epidermis development	9	6.23901e-05	0.00311146
green	GO BP term	GO:2001057	reactive nitrogen species metabolic process	9	6.23901e-05	0.00311146
green	GO BP term	GO:0009437	carnitine metabolic process	4	6.41936e-05	0.00311146
green	GO BP term	GO:0021978	telencephalon regionalization	4	6.41936e-05	0.00311146
green	GO BP term	GO:1901626	regulation of postsynaptic membrane organization	4	6.41936e-05	0.00311146
green	GO BP term	GO:0060411	cardiac septum morphogenesis	8	7.13658e-05	0.00335009
green	GO BP term	GO:1901616	organic hydroxy compound catabolic process	8	7.13658e-05	0.00335009
green	GO BP term	GO:0021871	forebrain regionalization	5	7.16151e-05	0.00335009
green	GO BP term	GO:0045197	establishment or maintenance of epithelial cell apical/basal polarity	6	7.35302e-05	0.00340014
green	GO BP term	GO:0006790	sulfur compound metabolic process	19	7.50508e-05	0.00343101
green	GO BP term	GO:0035272	exocrine system development	7	7.7524e-05	0.00350426
green	GO BP term	GO:0042303	molting cycle	10	8.16722e-05	0.00361063
green	GO BP term	GO:0042633	hair cycle	10	8.16722e-05	0.00361063
green	GO BP term	GO:0017001	antibiotic catabolic process	7	8.66199e-05	0.00378774
green	GO BP term	GO:0021781	glial cell fate commitment	4	8.8601e-05	0.00379194
green	GO BP term	GO:1902001	fatty acid transmembrane transport	4	8.8601e-05	0.00379194
green	GO BP term	GO:0006520	cellular amino acid metabolic process	18	0.000101555	0.00430057
green	GO BP term	GO:0042737	drug catabolic process	11	0.000103092	0.00432021
green	GO BP term	GO:0048754	branching morphogenesis of an epithelial tube	12	0.000104167	0.00432024
green	GO BP term	GO:0021987	cerebral cortex development	10	0.000106585	0.00436711
green	GO BP term	GO:1902882	regulation of response to oxidative stress	9	0.000107468	0.00436711
green	GO BP term	GO:0035088	establishment or maintenance of apical/basal cell polarity	6	0.000111617	0.00444589
green	GO BP term	GO:0061245	establishment or maintenance of bipolar cell polarity	6	0.000111617	0.00444589
green	GO BP term	GO:0007265	Ras protein signal transduction	21	0.000115311	0.00454801
green	GO BP term	GO:0003206	cardiac chamber morphogenesis	10	0.000121278	0.00473692
green	GO BP term	GO:0030166	proteoglycan biosynthetic process	7	0.000132117	0.00506804
green	GO BP term	GO:0061138	morphogenesis of a branching epithelium	13	0.000132276	0.00506804
green	GO BP term	GO:0072001	renal system development	16	0.0001426	0.00541207
green	GO BP term	GO:0014706	striated muscle tissue development	19	0.000145198	0.00545917
green	GO BP term	GO:0046320	regulation of fatty acid oxidation	5	0.000150909	0.00562137
green	GO BP term	GO:0006732	coenzyme metabolic process	18	0.000152725	0.00563681
green	GO BP term	GO:0033540	fatty acid beta-oxidation using acyl-CoA oxidase	4	0.000156576	0.00572641
green	GO BP term	GO:0050673	epithelial cell proliferation	20	0.0001583	0.00573731
green	GO BP term	GO:0001655	urogenital system development	17	0.000169155	0.00604071
green	GO BP term	GO:0002028	regulation of sodium ion transport	8	0.000169674	0.00604071
green	GO BP term	GO:0003279	cardiac septum development	9	0.000177117	0.00625037
green	GO BP term	GO:0021543	pallium development	12	0.00020056	0.00701612
green	GO BP term	GO:0014044	Schwann cell development	5	0.000209653	0.0072346
green	GO BP term	GO:0042180	cellular ketone metabolic process	12	0.000210402	0.0072346
green	GO BP term	GO:0071560	cellular response to transforming growth factor beta stimulus	14	0.000214739	0.00726337
green	GO BP term	GO:0048709	oligodendrocyte differentiation	8	0.00021485	0.00726337
green	GO BP term	GO:0021915	neural tube development	11	0.000223179	0.00748207
green	GO BP term	GO:0010721	negative regulation of cell development	17	0.000237253	0.00788818
green	GO BP term	GO:0003205	cardiac chamber development	11	0.000247465	0.00803226
green	GO BP term	GO:0001763	morphogenesis of a branching structure	13	0.000247577	0.00803226
green	GO BP term	GO:0045665	negative regulation of neuron differentiation	13	0.000247577	0.00803226
green	GO BP term	GO:0003007	heart morphogenesis	14	0.000252066	0.00809141
green	GO BP term	GO:0051056	regulation of small GTPase mediated signal transduction	17	0.000253422	0.00809141
green	GO BP term	GO:0031998	regulation of fatty acid beta-oxidation	4	0.000255881	0.00810559
green	GO BP term	GO:0060419	heart growth	9	0.000263538	0.00828291
green	GO BP term	GO:0098754	detoxification	10	0.000280146	0.00869408
green	GO BP term	GO:0061035	regulation of cartilage development	7	0.000280942	0.00869408
green	GO BP term	GO:0071559	response to transforming growth factor beta	14	0.000283602	0.00870941
green	GO BP term	GO:0007156	homophilic cell adhesion via plasma membrane adhesion molecules	11	0.000288061	0.0087793
green	GO BP term	GO:0007369	gastrulation	12	0.000291529	0.00881819
green	GO BP term	GO:0060562	epithelial tube morphogenesis	17	0.000298103	0.00894975
green	GO BP term	GO:0044272	sulfur compound biosynthetic process	12	0.000305042	0.00909025
green	GO BP term	GO:0001676	long-chain fatty acid metabolic process	9	0.000318371	0.00938355
green	GO BP term	GO:0006527	arginine catabolic process	4	0.000319549	0.00938355
green	GO BP term	GO:0045880	positive regulation of smoothened signaling pathway	5	0.000328525	0.00957722
green	GO BP term	GO:0006575	cellular modified amino acid metabolic process	12	0.000333668	0.00965717
green	GO BP term	GO:0050768	negative regulation of neurogenesis	15	0.000343201	0.00986213
green	GO BP term	GO:0050679	positive regulation of epithelial cell proliferation	12	0.000380858	0.0108666
green	GO BP term	GO:0003002	regionalization	17	0.000383827	0.0108742
green	GO BP term	GO:0019216	regulation of lipid metabolic process	18	0.000401722	0.0113016
green	GO BP term	GO:0031589	cell-substrate adhesion	17	0.000408324	0.0114075
green	GO BP term	GO:0046164	alcohol catabolic process	6	0.000443022	0.0122916
green	GO BP term	GO:0007163	establishment or maintenance of cell polarity	12	0.000452459	0.0124674
green	GO BP term	GO:0010565	regulation of cellular ketone metabolic process	9	0.000456478	0.0124926
green	GO BP term	GO:0006067	ethanol metabolic process	4	0.000479627	0.0129499
green	GO BP term	GO:0032332	positive regulation of chondrocyte differentiation	4	0.000479627	0.0129499
green	GO BP term	GO:0060441	epithelial tube branching involved in lung morphogenesis	5	0.000492467	0.013208
green	GO BP term	GO:0042136	neurotransmitter biosynthetic process	9	0.0005122	0.0136462
green	GO BP term	GO:0045428	regulation of nitric oxide biosynthetic process	7	0.000541879	0.014342
green	GO BP term	GO:0098742	cell-cell adhesion via plasma-membrane adhesion molecules	14	0.000573075	0.015001
green	GO BP term	GO:0006641	triglyceride metabolic process	8	0.000574802	0.015001
green	GO BP term	GO:0042402	cellular biogenic amine catabolic process	4	0.000577965	0.015001
green	GO BP term	GO:0060402	calcium ion transport into cytosol	10	0.000585009	0.0150865
green	GO BP term	GO:0015800	acidic amino acid transport	6	0.000591294	0.0151514
green	GO BP term	GO:0006979	response to oxidative stress	20	0.000611068	0.0155508
green	GO BP term	GO:0090596	sensory organ morphogenesis	14	0.000614609	0.0155508
green	GO BP term	GO:0032000	positive regulation of fatty acid beta-oxidation	3	0.000626473	0.0155903
green	GO BP term	GO:0072497	mesenchymal stem cell differentiation	3	0.000626473	0.0155903
green	GO BP term	GO:0014855	striated muscle cell proliferation	7	0.000630468	0.0155903
green	GO BP term	GO:0014037	Schwann cell differentiation	5	0.000631674	0.0155903
green	GO BP term	GO:1903825	organic acid transmembrane transport	9	0.000676279	0.0164889
green	GO BP term	GO:1905039	carboxylic acid transmembrane transport	9	0.000676279	0.0164889
green	GO BP term	GO:0007266	Rho protein signal transduction	12	0.000682635	0.0165436
green	GO BP term	GO:1905475	regulation of protein localization to membrane	11	0.000697817	0.0168103
green	GO BP term	GO:0050808	synapse organization	18	0.000706371	0.0169151
green	GO BP term	GO:0034599	cellular response to oxidative stress	15	0.00074227	0.0176695
green	GO BP term	GO:0007389	pattern specification process	19	0.000760938	0.0180074
green	GO BP term	GO:0006536	glutamate metabolic process	5	0.000798431	0.018567
green	GO BP term	GO:0017145	stem cell division	5	0.000798431	0.018567
green	GO BP term	GO:0021532	neural tube patterning	5	0.000798431	0.018567
green	GO BP term	GO:0015813	L-glutamate transmembrane transport	4	0.00081614	0.0186854
green	GO BP term	GO:0021904	dorsal/ventral neural tube patterning	4	0.00081614	0.0186854
green	GO BP term	GO:0048592	eye morphogenesis	10	0.000818669	0.0186854
green	GO BP term	GO:0055017	cardiac muscle tissue growth	8	0.000833357	0.0186854
green	GO BP term	GO:0001822	kidney development	14	0.000834583	0.0186854
green	GO BP term	GO:0030111	regulation of Wnt signaling pathway	15	0.000841647	0.0186854
green	GO BP term	GO:0021521	ventral spinal cord interneuron specification	3	0.000849968	0.0186854
green	GO BP term	GO:0021936	regulation of cerebellar granule cell precursor proliferation	3	0.000849968	0.0186854
green	GO BP term	GO:0060573	cell fate specification involved in pattern specification	3	0.000849968	0.0186854
green	GO BP term	GO:0061299	retina vasculature morphogenesis in camera-type eye	3	0.000849968	0.0186854
green	GO BP term	GO:0031099	regeneration	11	0.000863315	0.0188756
green	GO BP term	GO:0006656	phosphatidylcholine biosynthetic process	5	0.000893151	0.0192636
green	GO BP term	GO:0015849	organic acid transport	15	0.000895425	0.0192636
green	GO BP term	GO:0046942	carboxylic acid transport	15	0.000895425	0.0192636
green	GO BP term	GO:0044106	cellular amine metabolic process	7	0.000902706	0.019317
green	GO BP term	GO:0002011	morphogenesis of an epithelial sheet	6	0.00092088	0.0194984
green	GO BP term	GO:1902305	regulation of sodium ion transmembrane transport	6	0.00092088	0.0194984
green	GO BP term	GO:0022900	electron transport chain	11	0.000938035	0.0196548
green	GO BP term	GO:0048639	positive regulation of developmental growth	11	0.000938035	0.0196548
green	GO BP term	GO:0009895	negative regulation of catabolic process	15	0.000952085	0.0198458
green	GO BP term	GO:0086064	cell communication by electrical coupling involved in cardiac conduction	4	0.000957955	0.0198652
green	GO BP term	GO:0045995	regulation of embryonic development	9	0.000975784	0.0201312
green	GO BP term	GO:0043648	dicarboxylic acid metabolic process	8	0.000993764	0.0201349
green	GO BP term	GO:1903426	regulation of reactive oxygen species biosynthetic process	8	0.000993764	0.0201349
green	GO BP term	GO:0001941	postsynaptic membrane organization	5	0.000995985	0.0201349
green	GO BP term	GO:0007435	salivary gland morphogenesis	5	0.000995985	0.0201349
green	GO BP term	GO:0060070	canonical Wnt signaling pathway	14	0.00101548	0.0204263
green	GO BP term	GO:0034308	primary alcohol metabolic process	7	0.00103452	0.0207058
green	GO BP term	GO:0006637	acyl-CoA metabolic process	8	0.0010524	0.0207876
green	GO BP term	GO:0035383	thioester metabolic process	8	0.0010524	0.0207876
green	GO BP term	GO:0019932	second-messenger-mediated signaling	19	0.00105411	0.0207876
green	GO BP term	GO:0042246	tissue regeneration	6	0.00108643	0.0213206
green	GO BP term	GO:0048644	muscle organ morphogenesis	7	0.00110586	0.0213326
green	GO BP term	GO:0008356	asymmetric cell division	4	0.00111624	0.0213326
green	GO BP term	GO:0045992	negative regulation of embryonic development	4	0.00111624	0.0213326
green	GO BP term	GO:0060740	prostate gland epithelium morphogenesis	4	0.00111624	0.0213326
green	GO BP term	GO:0006069	ethanol oxidation	3	0.00111826	0.0213326
green	GO BP term	GO:0006633	fatty acid biosynthetic process	10	0.00112417	0.0213326
green	GO BP term	GO:2001236	regulation of extrinsic apoptotic signaling pathway	10	0.00112417	0.0213326
green	GO BP term	GO:0060401	cytosolic calcium ion transport	10	0.00117456	0.0220986
green	GO BP term	GO:0006029	proteoglycan metabolic process	7	0.00118101	0.0220986
green	GO BP term	GO:0006809	nitric oxide biosynthetic process	7	0.00118101	0.0220986
green	GO BP term	GO:0043491	protein kinase B signaling	13	0.0012573	0.0233611
green	GO BP term	GO:0034446	substrate adhesion-dependent cell spreading	7	0.0012601	0.0233611
green	GO BP term	GO:0051146	striated muscle cell differentiation	14	0.00126714	0.023384
green	GO BP term	GO:0006525	arginine metabolic process	4	0.001292	0.0236259
green	GO BP term	GO:1902884	positive regulation of response to oxidative stress	4	0.001292	0.0236259
green	GO BP term	GO:0010959	regulation of metal ion transport	17	0.00130552	0.0237319
green	GO BP term	GO:0048732	gland development	19	0.00130959	0.0237319
green	GO BP term	GO:0001649	osteoblast differentiation	12	0.00134342	0.0242359
green	GO BP term	GO:0007431	salivary gland development	5	0.00135742	0.0243789
green	GO BP term	GO:0072089	stem cell proliferation	8	0.00138845	0.0246621
green	GO BP term	GO:0048738	cardiac muscle tissue development	12	0.00139188	0.0246621
green	GO BP term	GO:0030279	negative regulation of ossification	7	0.00143068	0.0246621
green	GO BP term	GO:0007548	sex differentiation	13	0.00143442	0.0246621
green	GO BP term	GO:0017014	protein nitrosylation	3	0.00143449	0.0246621
green	GO BP term	GO:0018119	peptidyl-cysteine S-nitrosylation	3	0.00143449	0.0246621
green	GO BP term	GO:0021520	spinal cord motor neuron cell fate specification	3	0.00143449	0.0246621
green	GO BP term	GO:0036109	alpha-linolenic acid metabolic process	3	0.00143449	0.0246621
green	GO BP term	GO:0048505	regulation of timing of cell differentiation	3	0.00143449	0.0246621
green	GO BP term	GO:0060601	lateral sprouting from an epithelium	3	0.00143449	0.0246621
green	GO BP term	GO:0046622	positive regulation of organ growth	6	0.00148515	0.0250168
green	GO BP term	GO:2000736	regulation of stem cell differentiation	6	0.00148515	0.0250168
green	GO BP term	GO:0022011	myelination in peripheral nervous system	4	0.00148621	0.0250168
green	GO BP term	GO:0032292	peripheral nervous system axon ensheathment	4	0.00148621	0.0250168
green	GO BP term	GO:0060512	prostate gland morphogenesis	4	0.00148621	0.0250168
green	GO BP term	GO:0042398	cellular modified amino acid biosynthetic process	5	0.00149698	0.0250931
green	GO BP term	GO:0046209	nitric oxide metabolic process	7	0.00152245	0.0253114
green	GO BP term	GO:0010769	regulation of cell morphogenesis involved in differentiation	14	0.00152258	0.0253114
green	GO BP term	GO:0034332	adherens junction organization	9	0.00158189	0.026189
green	GO BP term	GO:0009308	amine metabolic process	7	0.00161876	0.0266896
green	GO BP term	GO:0060560	developmental growth involved in morphogenesis	12	0.00165631	0.0271973
green	GO BP term	GO:0033865	nucleoside bisphosphate metabolic process	9	0.00173328	0.0281168
green	GO BP term	GO:0033875	ribonucleoside bisphosphate metabolic process	9	0.00173328	0.0281168
green	GO BP term	GO:0034032	purine nucleoside bisphosphate metabolic process	9	0.00173328	0.0281168
green	GO BP term	GO:0000052	citrulline metabolic process	3	0.00180155	0.0286467
green	GO BP term	GO:0036376	sodium ion export across plasma membrane	3	0.00180155	0.0286467
green	GO BP term	GO:0040034	regulation of development, heterochronic	3	0.00180155	0.0286467
green	GO BP term	GO:0060831	smoothened signaling pathway involved in dorsal/ventral neural tube patterning	3	0.00180155	0.0286467
green	GO BP term	GO:0098712	L-glutamate import across plasma membrane	3	0.00180155	0.0286467
green	GO BP term	GO:0034330	cell junction organization	14	0.00187353	0.0296741
green	GO BP term	GO:0106106	cold-induced thermogenesis	9	0.00189606	0.0297962
green	GO BP term	GO:0120161	regulation of cold-induced thermogenesis	9	0.00189606	0.0297962
green	GO BP term	GO:0010543	regulation of platelet activation	4	0.00193392	0.0299609
green	GO BP term	GO:0010644	cell communication by electrical coupling	4	0.00193392	0.0299609
green	GO BP term	GO:1901661	quinone metabolic process	4	0.00193392	0.0299609
green	GO BP term	GO:0062014	negative regulation of small molecule metabolic process	7	0.00193632	0.0299609
green	GO BP term	GO:0051216	cartilage development	11	0.0019529	0.0301016
green	GO BP term	GO:0046578	regulation of Ras protein signal transduction	12	0.00196079	0.0301078
green	GO BP term	GO:0010718	positive regulation of epithelial to mesenchymal transition	5	0.00197911	0.0302736
green	GO BP term	GO:1990748	cellular detoxification	8	0.00199637	0.0304219
green	GO BP term	GO:0048638	regulation of developmental growth	15	0.00201129	0.0304725
green	GO BP term	GO:0048015	phosphatidylinositol-mediated signaling	10	0.00201484	0.0304725
green	GO BP term	GO:0048762	mesenchymal cell differentiation	11	0.00202452	0.0305043
green	GO BP term	GO:0001101	response to acid chemical	15	0.00212274	0.0318525
green	GO BP term	GO:0006081	cellular aldehyde metabolic process	6	0.00212983	0.0318525
green	GO BP term	GO:0061383	trabecula morphogenesis	5	0.00216246	0.0322206
green	GO BP term	GO:0034310	primary alcohol catabolic process	3	0.00222215	0.0325081
green	GO BP term	GO:0046321	positive regulation of fatty acid oxidation	3	0.00222215	0.0325081
green	GO BP term	GO:0051938	L-glutamate import	3	0.00222215	0.0325081
green	GO BP term	GO:0060579	ventral spinal cord interneuron fate commitment	3	0.00222215	0.0325081
green	GO BP term	GO:0060581	cell fate commitment involved in pattern specification	3	0.00222215	0.0325081
green	GO BP term	GO:0016331	morphogenesis of embryonic epithelium	9	0.00225822	0.0328952
green	GO BP term	GO:0048017	inositol lipid-mediated signaling	10	0.00226497	0.0328952
green	GO BP term	GO:0010522	regulation of calcium ion transport into cytosol	7	0.00230014	0.0332859
green	GO BP term	GO:2001238	positive regulation of extrinsic apoptotic signaling pathway	5	0.00235788	0.0339991
green	GO BP term	GO:0098656	anion transmembrane transport	13	0.00243481	0.034983
green	GO BP term	GO:0001659	temperature homeostasis	10	0.00244517	0.0350068
green	GO BP term	GO:0048741	skeletal muscle fiber development	4	0.00246715	0.0350719
green	GO BP term	GO:0061036	positive regulation of cartilage development	4	0.00246715	0.0350719
green	GO BP term	GO:0045137	development of primary sexual characteristics	11	0.00258793	0.0366593
green	GO BP term	GO:0007422	peripheral nervous system development	6	0.00260655	0.0367935
green	GO BP term	GO:0048608	reproductive structure development	17	0.00266679	0.0371828
green	GO BP term	GO:1990845	adaptive thermogenesis	9	0.00267339	0.0371828
green	GO BP term	GO:0019935	cyclic-nucleotide-mediated signaling	11	0.00267785	0.0371828
green	GO BP term	GO:0042692	muscle cell differentiation	16	0.00269822	0.0371828
green	GO BP term	GO:0014857	regulation of skeletal muscle cell proliferation	3	0.00269883	0.0371828
green	GO BP term	GO:0050651	dermatan sulfate proteoglycan biosynthetic process	3	0.00269883	0.0371828
green	GO BP term	GO:0072488	ammonium transmembrane transport	3	0.00269883	0.0371828
green	GO BP term	GO:0045927	positive regulation of growth	13	0.00273874	0.0376039
green	GO BP term	GO:0021696	cerebellar cortex morphogenesis	4	0.00276823	0.0377511
green	GO BP term	GO:0021772	olfactory bulb development	4	0.00276823	0.0377511
green	GO BP term	GO:0006576	cellular biogenic amine metabolic process	5	0.00278677	0.0378756
green	GO BP term	GO:0061458	reproductive system development	17	0.00285839	0.0387182
green	GO BP term	GO:0006639	acylglycerol metabolic process	8	0.002929	0.0394092
green	GO BP term	GO:1903409	reactive oxygen species biosynthetic process	8	0.002929	0.0394092
green	GO BP term	GO:0045785	positive regulation of cell adhesion	18	0.00297346	0.0398741
green	GO BP term	GO:0019933	cAMP-mediated signaling	10	0.00305576	0.0405382
green	GO BP term	GO:0006638	neutral lipid metabolic process	8	0.00306607	0.0405382
green	GO BP term	GO:0051188	cofactor biosynthetic process	13	0.00307303	0.0405382
green	GO BP term	GO:0007263	nitric oxide mediated signal transduction	4	0.00309352	0.0405382
green	GO BP term	GO:0021988	olfactory lobe development	4	0.00309352	0.0405382
green	GO BP term	GO:0043403	skeletal muscle tissue regeneration	4	0.00309352	0.0405382
green	GO BP term	GO:0061384	heart trabecula morphogenesis	4	0.00309352	0.0405382
green	GO BP term	GO:0034329	cell junction assembly	12	0.00315997	0.0411707
green	GO BP term	GO:0014856	skeletal muscle cell proliferation	3	0.00323389	0.0411707
green	GO BP term	GO:0021514	ventral spinal cord interneuron differentiation	3	0.00323389	0.0411707
green	GO BP term	GO:0045019	negative regulation of nitric oxide biosynthetic process	3	0.00323389	0.0411707
green	GO BP term	GO:0048385	regulation of retinoic acid receptor signaling pathway	3	0.00323389	0.0411707
green	GO BP term	GO:0050655	dermatan sulfate proteoglycan metabolic process	3	0.00323389	0.0411707
green	GO BP term	GO:0060413	atrial septum morphogenesis	3	0.00323389	0.0411707
green	GO BP term	GO:0071397	cellular response to cholesterol	3	0.00323389	0.0411707
green	GO BP term	GO:1904406	negative regulation of nitric oxide metabolic process	3	0.00323389	0.0411707
green	GO BP term	GO:0009108	coenzyme biosynthetic process	11	0.00327182	0.0415222
green	GO BP term	GO:0001666	response to hypoxia	14	0.00335024	0.042313
green	GO BP term	GO:0001704	formation of primary germ layer	8	0.00335517	0.042313
green	GO BP term	GO:0014904	myotube cell development	4	0.00344395	0.043162
green	GO BP term	GO:0045923	positive regulation of fatty acid metabolic process	4	0.00344395	0.043162
green	GO BP term	GO:0019320	hexose catabolic process	5	0.00353204	0.0439919
green	GO BP term	GO:0043113	receptor clustering	5	0.00353204	0.0439919
green	GO BP term	GO:0014068	positive regulation of phosphatidylinositol 3-kinase signaling	6	0.00357325	0.0443678
green	GO BP term	GO:0045667	regulation of osteoblast differentiation	8	0.00366499	0.0453669
green	GO BP term	GO:0060415	muscle tissue morphogenesis	6	0.00379479	0.0458513
green	GO BP term	GO:0061180	mammary gland epithelium development	6	0.00379479	0.0458513
green	GO BP term	GO:0035094	response to nicotine	5	0.00380947	0.0458513
green	GO BP term	GO:0060425	lung morphogenesis	5	0.00380947	0.0458513
green	GO BP term	GO:0040018	positive regulation of multicellular organism growth	4	0.00382041	0.0458513
green	GO BP term	GO:1903427	negative regulation of reactive oxygen species biosynthetic process	4	0.00382041	0.0458513
green	GO BP term	GO:1905332	positive regulation of morphogenesis of an epithelium	4	0.00382041	0.0458513
green	GO BP term	GO:0043062	extracellular structure organization	17	0.00382606	0.0458513
green	GO BP term	GO:0006544	glycine metabolic process	3	0.00382949	0.0458513
green	GO BP term	GO:0061298	retina vasculature development in camera-type eye	3	0.00382949	0.0458513
green	GO BP term	GO:1902043	positive regulation of extrinsic apoptotic signaling pathway via death domain receptors	3	0.00382949	0.0458513
green	GO BP term	GO:0007031	peroxisome organization	6	0.00402635	0.0480653
green	GO BP term	GO:0000302	response to reactive oxygen species	11	0.00409384	0.0485381
green	GO BP term	GO:0098739	import across plasma membrane	7	0.00410105	0.0485381
green	GO BP term	GO:0007405	neuroblast proliferation	5	0.00410215	0.0485381
green	GO BP term	GO:0048384	retinoic acid receptor signaling pathway	4	0.0042238	0.049831
green	GO BP term	GO:0061448	connective tissue development	12	0.00424765	0.0499658
green	KEGG pathway	hsa00071	Fatty acid degradation	24	1.67482e-20	4.18704e-18
green	KEGG pathway	hsa01212	Fatty acid metabolism	22	3.73286e-16	4.66607e-14
green	KEGG pathway	hsa00280	Valine, leucine and isoleucine degradation	16	1.10173e-10	9.18108e-09
green	KEGG pathway	hsa01200	Carbon metabolism	23	1.10668e-09	6.91676e-08
green	KEGG pathway	hsa03320	PPAR signaling pathway	18	2.68269e-09	1.34134e-07
green	KEGG pathway	hsa00380	Tryptophan metabolism	12	5.76546e-08	2.40227e-06
green	KEGG pathway	hsa04976	Bile secretion	15	2.17049e-07	7.75173e-06
green	KEGG pathway	hsa00640	Propanoate metabolism	10	6.62133e-07	2.06916e-05
green	KEGG pathway	hsa00410	beta-Alanine metabolism	9	2.47511e-06	6.8753e-05
green	KEGG pathway	hsa00062	Fatty acid elongation	8	3.2937e-06	8.23425e-05
green	KEGG pathway	hsa04971	Gastric acid secretion	13	8.76262e-06	0.00019915
green	KEGG pathway	hsa04390	Hippo signaling pathway	19	1.00346e-05	0.000209054
green	KEGG pathway	hsa05414	Dilated cardiomyopathy (DCM)	14	1.30918e-05	0.000236275
green	KEGG pathway	hsa04340	Hedgehog signaling pathway	10	1.32314e-05	0.000236275
green	KEGG pathway	hsa04970	Salivary secretion	13	2.83581e-05	0.000472636
green	KEGG pathway	hsa04911	Insulin secretion	13	3.0833e-05	0.000481766
green	KEGG pathway	hsa04510	Focal adhesion	22	3.83911e-05	0.000555336
green	KEGG pathway	hsa04920	Adipocytokine signaling pathway	12	3.99842e-05	0.000555336
green	KEGG pathway	hsa00260	Glycine, serine and threonine metabolism	9	5.92643e-05	0.000779793
green	KEGG pathway	hsa05412	Arrhythmogenic right ventricular cardiomyopathy (ARVC)	11	9.48494e-05	0.00118562
green	KEGG pathway	hsa00561	Glycerolipid metabolism	10	0.000109313	0.00130134
green	KEGG pathway	hsa00310	Lysine degradation	9	0.000117263	0.00133253
green	KEGG pathway	hsa00340	Histidine metabolism	6	0.00013233	0.00143208
green	KEGG pathway	hsa00330	Arginine and proline metabolism	9	0.000144909	0.00143208
green	KEGG pathway	hsa04928	Parathyroid hormone synthesis, secretion and action	14	0.000145137	0.00143208
green	KEGG pathway	hsa04972	Pancreatic secretion	13	0.000148936	0.00143208
green	KEGG pathway	hsa04020	Calcium signaling pathway	19	0.000170514	0.00157883
green	KEGG pathway	hsa04713	Circadian entrainment	13	0.000181905	0.00162415
green	KEGG pathway	hsa04918	Thyroid hormone synthesis	11	0.000198813	0.0017139
green	KEGG pathway	hsa04261	Adrenergic signaling in cardiomyocytes	16	0.000226776	0.0018898
green	KEGG pathway	hsa04724	Glutamatergic synapse	14	0.000235892	0.00190008
green	KEGG pathway	hsa04919	Thyroid hormone signaling pathway	14	0.000250101	0.00190008
green	KEGG pathway	hsa04925	Aldosterone synthesis and secretion	13	0.000250811	0.00190008
green	KEGG pathway	hsa00010	Glycolysis / Gluconeogenesis	10	0.000537338	0.00395102
green	KEGG pathway	hsa04024	cAMP signaling pathway	20	0.000603247	0.00430891
green	KEGG pathway	hsa00650	Butanoate metabolism	6	0.000952928	0.00661755
green	KEGG pathway	hsa01522	Endocrine resistance	12	0.000987963	0.00667543
green	KEGG pathway	hsa04512	ECM-receptor interaction	10	0.00166605	0.0107157
green	KEGG pathway	hsa04933	AGE-RAGE signaling pathway in diabetic complications	12	0.00167164	0.0107157
green	KEGG pathway	hsa04964	Proximal tubule bicarbonate reclamation	5	0.00180338	0.0112711
green	KEGG pathway	hsa00562	Inositol phosphate metabolism	9	0.00226478	0.0134173
green	KEGG pathway	hsa05226	Gastric cancer	14	0.00228397	0.0134173
green	KEGG pathway	hsa05217	Basal cell carcinoma	8	0.00231099	0.0134173
green	KEGG pathway	hsa04540	Gap junction	10	0.00236144	0.0134173
green	KEGG pathway	hsa00053	Ascorbate and aldarate metabolism	5	0.00264962	0.0147005
green	KEGG pathway	hsa04725	Cholinergic synapse	12	0.00270489	0.0147005
green	KEGG pathway	hsa04922	Glucagon signaling pathway	11	0.00300673	0.0159933
green	KEGG pathway	hsa04978	Mineral absorption	7	0.00322083	0.0167752
green	KEGG pathway	hsa00350	Tyrosine metabolism	6	0.0033708	0.0171979
green	KEGG pathway	hsa01521	EGFR tyrosine kinase inhibitor resistance	9	0.00457148	0.0227849
green	KEGG pathway	hsa00030	Pentose phosphate pathway	5	0.00464813	0.0227849
green	KEGG pathway	hsa00250	Alanine, aspartate and glutamate metabolism	6	0.00476363	0.0229021
green	KEGG pathway	hsa04913	Ovarian steroidogenesis	7	0.00497785	0.0234804
green	KEGG pathway	hsa04022	cGMP-PKG signaling pathway	14	0.00653803	0.0299309
green	KEGG pathway	hsa05410	Hypertrophic cardiomyopathy (HCM)	9	0.0065848	0.0299309
green	KEGG pathway	hsa04213	Longevity regulating pathway - multiple species	8	0.00673957	0.0300874
green	KEGG pathway	hsa04720	Long-term potentiation	8	0.00793941	0.0345133
green	KEGG pathway	hsa04727	GABAergic synapse	9	0.00800708	0.0345133
green	KEGG pathway	hsa04961	Endocrine and other factor-regulated calcium reabsorption	6	0.0087533	0.0368212
green	KEGG pathway	hsa04916	Melanogenesis	10	0.00883708	0.0368212
green	KEGG pathway	hsa05032	Morphine addiction	9	0.00921898	0.0377827
green	KEGG pathway	hsa05206	MicroRNAs in cancer	13	0.011969	0.0482622
green	KEGG pathway	hsa00980	Metabolism of xenobiotics by cytochrome P450	8	0.0125074	0.0490357
green	KEGG pathway	hsa04270	Vascular smooth muscle contraction	11	0.0125531	0.0490357
green	KEGG pathway	hsa00220	Arginine biosynthesis	4	0.0128909	0.0495804
greenyellow	GO BP term	GO:0006457	protein folding	25	1.70503e-28	2.6752e-25
greenyellow	GO BP term	GO:0006986	response to unfolded protein	20	1.1638e-22	9.12999e-20
greenyellow	GO BP term	GO:0061077	chaperone-mediated protein folding	15	9.04772e-22	4.73196e-19
greenyellow	GO BP term	GO:0035966	response to topologically incorrect protein	20	2.6318e-21	1.03233e-18
greenyellow	GO BP term	GO:0009408	response to heat	17	1.19122e-18	3.73804e-16
greenyellow	GO BP term	GO:0034605	cellular response to heat	14	1.63088e-16	4.26475e-14
greenyellow	GO BP term	GO:0009266	response to temperature stimulus	17	1.96687e-16	4.40859e-14
greenyellow	GO BP term	GO:1900034	regulation of cellular response to heat	11	1.55606e-15	3.05182e-13
greenyellow	GO BP term	GO:0006458	'de novo' protein folding	10	1.34531e-14	2.34533e-12
greenyellow	GO BP term	GO:0042026	protein refolding	9	6.42193e-14	1.0076e-11
greenyellow	GO BP term	GO:0051085	chaperone cofactor-dependent protein refolding	9	1.31102e-13	1.86999e-11
greenyellow	GO BP term	GO:0051084	'de novo' posttranslational protein folding	9	3.83349e-13	5.01229e-11
greenyellow	GO BP term	GO:0090084	negative regulation of inclusion body assembly	5	1.70203e-08	2.05422e-06
greenyellow	GO BP term	GO:0034620	cellular response to unfolded protein	9	2.11093e-08	2.36575e-06
greenyellow	GO BP term	GO:0031647	regulation of protein stability	11	5.59711e-08	5.62616e-06
greenyellow	GO BP term	GO:0090083	regulation of inclusion body assembly	5	5.73732e-08	5.62616e-06
greenyellow	GO BP term	GO:0035967	cellular response to topologically incorrect protein	9	9.46511e-08	8.73574e-06
greenyellow	GO BP term	GO:0051131	chaperone-mediated protein complex assembly	5	1.05085e-07	9.15993e-06
greenyellow	GO BP term	GO:0050821	protein stabilization	9	1.35121e-07	1.11582e-05
greenyellow	GO BP term	GO:0032781	positive regulation of ATPase activity	6	1.9043e-07	1.49392e-05
greenyellow	GO BP term	GO:0070841	inclusion body assembly	5	5.93723e-07	4.43596e-05
greenyellow	GO BP term	GO:1901998	toxin transport	5	6.7631e-07	4.82332e-05
greenyellow	GO BP term	GO:0043462	regulation of ATPase activity	6	1.53015e-06	0.000104383
greenyellow	GO BP term	GO:0034976	response to endoplasmic reticulum stress	9	3.9664e-06	0.000259303
greenyellow	GO BP term	GO:0018126	protein hydroxylation	4	4.70175e-06	0.000295082
greenyellow	GO BP term	GO:1903405	protein localization to nuclear body	3	8.36801e-06	0.000468907
greenyellow	GO BP term	GO:1904851	positive regulation of establishment of protein localization to telomere	3	8.36801e-06	0.000468907
greenyellow	GO BP term	GO:1904867	protein localization to Cajal body	3	8.36801e-06	0.000468907
greenyellow	GO BP term	GO:0070203	regulation of establishment of protein localization to telomere	3	1.14711e-05	0.000620627
greenyellow	GO BP term	GO:0070202	regulation of establishment of protein localization to chromosome	3	1.52484e-05	0.00074765
greenyellow	GO BP term	GO:1904816	positive regulation of protein localization to chromosome, telomeric region	3	1.52484e-05	0.00074765
greenyellow	GO BP term	GO:1990173	protein localization to nucleoplasm	3	1.52484e-05	0.00074765
greenyellow	GO BP term	GO:0007004	telomere maintenance via telomerase	5	1.79809e-05	0.000854909
greenyellow	GO BP term	GO:2000573	positive regulation of DNA biosynthetic process	5	1.91494e-05	0.00088369
greenyellow	GO BP term	GO:0006278	RNA-dependent DNA biosynthetic process	5	2.03763e-05	0.000913439
greenyellow	GO BP term	GO:1904814	regulation of protein localization to chromosome, telomeric region	3	2.50765e-05	0.00109292
greenyellow	GO BP term	GO:0051973	positive regulation of telomerase activity	4	2.59436e-05	0.00110015
greenyellow	GO BP term	GO:0043618	regulation of transcription from RNA polymerase II promoter in response to stress	5	2.90774e-05	0.00120059
greenyellow	GO BP term	GO:0042149	cellular response to glucose starvation	4	3.14142e-05	0.00126382
greenyellow	GO BP term	GO:0031396	regulation of protein ubiquitination	7	3.26766e-05	0.00128174
greenyellow	GO BP term	GO:0070200	establishment of protein localization to telomere	3	3.83458e-05	0.00143249
greenyellow	GO BP term	GO:1904874	positive regulation of telomerase RNA localization to Cajal body	3	3.83458e-05	0.00143249
greenyellow	GO BP term	GO:0010833	telomere maintenance via telomere lengthening	5	4.04205e-05	0.00147488
greenyellow	GO BP term	GO:0043620	regulation of DNA-templated transcription in response to stress	5	4.26034e-05	0.0015192
greenyellow	GO BP term	GO:0007339	binding of sperm to zona pellucida	4	4.4827e-05	0.00156297
greenyellow	GO BP term	GO:0009267	cellular response to starvation	6	5.19486e-05	0.0017719
greenyellow	GO BP term	GO:1903320	regulation of protein modification by small protein conjugation or removal	7	6.75321e-05	0.00225442
greenyellow	GO BP term	GO:0051054	positive regulation of DNA metabolic process	7	7.30075e-05	0.00238643
greenyellow	GO BP term	GO:1904872	regulation of telomerase RNA localization to Cajal body	3	7.71195e-05	0.0024694
greenyellow	GO BP term	GO:0051972	regulation of telomerase activity	4	8.35544e-05	0.00260629
greenyellow	GO BP term	GO:0090670	RNA localization to Cajal body	3	8.97004e-05	0.00260629
greenyellow	GO BP term	GO:0090671	telomerase RNA localization to Cajal body	3	8.97004e-05	0.00260629
greenyellow	GO BP term	GO:0090672	telomerase RNA localization	3	8.97004e-05	0.00260629
greenyellow	GO BP term	GO:0090685	RNA localization to nucleus	3	8.97004e-05	0.00260629
greenyellow	GO BP term	GO:1901522	positive regulation of transcription from RNA polymerase II promoter involved in cellular response to chemical stimulus	3	0.000103549	0.00295398
greenyellow	GO BP term	GO:0035036	sperm-egg recognition	4	0.000142256	0.0039857
greenyellow	GO BP term	GO:2000278	regulation of DNA biosynthetic process	5	0.000144816	0.00398625
greenyellow	GO BP term	GO:0070199	establishment of protein localization to chromosome	3	0.000153252	0.00414572
greenyellow	GO BP term	GO:0042594	response to starvation	6	0.000171257	0.00451654
greenyellow	GO BP term	GO:0071243	cellular response to arsenic-containing substance	3	0.000172717	0.00451654
greenyellow	GO BP term	GO:0030218	erythrocyte differentiation	5	0.0002986	0.0076804
greenyellow	GO BP term	GO:0070198	protein localization to chromosome, telomeric region	3	0.000323558	0.00818811
greenyellow	GO BP term	GO:1900182	positive regulation of protein localization to nucleus	4	0.000393189	0.00979228
greenyellow	GO BP term	GO:0009988	cell-cell recognition	4	0.000411786	0.0100952
greenyellow	GO BP term	GO:0034101	erythrocyte homeostasis	5	0.000423823	0.0102304
greenyellow	GO BP term	GO:0030522	intracellular receptor signaling pathway	7	0.000449865	0.0105449
greenyellow	GO BP term	GO:0072655	establishment of protein localization to mitochondrion	5	0.000450293	0.0105449
greenyellow	GO BP term	GO:0038034	signal transduction in absence of ligand	4	0.000471342	0.0107179
greenyellow	GO BP term	GO:0097192	extrinsic apoptotic signaling pathway in absence of ligand	4	0.000471342	0.0107179
greenyellow	GO BP term	GO:0032212	positive regulation of telomere maintenance via telomerase	3	0.000499256	0.0111905
greenyellow	GO BP term	GO:0070585	protein localization to mitochondrion	5	0.00052192	0.0115337
greenyellow	GO BP term	GO:0031669	cellular response to nutrient levels	6	0.000531578	0.011584
greenyellow	GO BP term	GO:0036003	positive regulation of transcription from RNA polymerase II promoter in response to stress	3	0.000540412	0.0116152
greenyellow	GO BP term	GO:2001234	negative regulation of apoptotic signaling pathway	6	0.000604857	0.0128246
greenyellow	GO BP term	GO:0046685	response to arsenic-containing substance	3	0.000629101	0.0129636
greenyellow	GO BP term	GO:1905897	regulation of response to endoplasmic reticulum stress	4	0.000633803	0.0129636
greenyellow	GO BP term	GO:0008037	cell recognition	5	0.0006362	0.0129636
greenyellow	GO BP term	GO:1904358	positive regulation of telomere maintenance via telomere lengthening	3	0.000676718	0.0136124
greenyellow	GO BP term	GO:0000723	telomere maintenance	5	0.00083078	0.0164999
greenyellow	GO BP term	GO:0002262	myeloid cell homeostasis	5	0.000874492	0.017151
greenyellow	GO BP term	GO:0070426	positive regulation of nucleotide-binding oligomerization domain containing signaling pathway	2	0.000933049	0.0178531
greenyellow	GO BP term	GO:0070434	positive regulation of nucleotide-binding oligomerization domain containing 2 signaling pathway	2	0.000933049	0.0178531
greenyellow	GO BP term	GO:0006839	mitochondrial transport	6	0.000961074	0.0181678
greenyellow	GO BP term	GO:2001243	negative regulation of intrinsic apoptotic signaling pathway	4	0.00103476	0.019133
greenyellow	GO BP term	GO:0006979	response to oxidative stress	8	0.00105714	0.019133
greenyellow	GO BP term	GO:1904951	positive regulation of establishment of protein localization	8	0.00111342	0.019133
greenyellow	GO BP term	GO:0043619	regulation of transcription from RNA polymerase II promoter in response to oxidative stress	2	0.00111661	0.019133
greenyellow	GO BP term	GO:0061684	chaperone-mediated autophagy	2	0.00111661	0.019133
greenyellow	GO BP term	GO:0090063	positive regulation of microtubule nucleation	2	0.00111661	0.019133
greenyellow	GO BP term	GO:0031668	cellular response to extracellular stimulus	6	0.0011169	0.019133
greenyellow	GO BP term	GO:0006984	ER-nucleus signaling pathway	3	0.00114168	0.019133
greenyellow	GO BP term	GO:1901099	negative regulation of signal transduction in absence of ligand	3	0.00114168	0.019133
greenyellow	GO BP term	GO:2001240	negative regulation of extrinsic apoptotic signaling pathway in absence of ligand	3	0.00114168	0.019133
greenyellow	GO BP term	GO:0032200	telomere organization	5	0.00114627	0.019133
greenyellow	GO BP term	GO:0006626	protein targeting to mitochondrion	4	0.00122787	0.0202793
greenyellow	GO BP term	GO:0010286	heat acclimation	2	0.00131604	0.0208572
greenyellow	GO BP term	GO:0036500	ATF6-mediated unfolded protein response	2	0.00131604	0.0208572
greenyellow	GO BP term	GO:0070370	cellular heat acclimation	2	0.00131604	0.0208572
greenyellow	GO BP term	GO:0071287	cellular response to manganese ion	2	0.00131604	0.0208572
greenyellow	GO BP term	GO:1903573	negative regulation of response to endoplasmic reticulum stress	3	0.00143422	0.022503
greenyellow	GO BP term	GO:0031113	regulation of microtubule polymerization	3	0.00151402	0.0228387
greenyellow	GO BP term	GO:0010968	regulation of microtubule nucleation	2	0.0015312	0.0228387
greenyellow	GO BP term	GO:0061635	regulation of protein complex stability	2	0.0015312	0.0228387
greenyellow	GO BP term	GO:0070432	regulation of nucleotide-binding oligomerization domain containing 2 signaling pathway	2	0.0015312	0.0228387
greenyellow	GO BP term	GO:1990440	positive regulation of transcription from RNA polymerase II promoter in response to endoplasmic reticulum stress	2	0.0015312	0.0228387
greenyellow	GO BP term	GO:0071897	DNA biosynthetic process	5	0.00154296	0.0228387
greenyellow	GO BP term	GO:0034504	protein localization to nucleus	6	0.00164636	0.0241414
greenyellow	GO BP term	GO:0045926	negative regulation of growth	6	0.00167428	0.0243236
greenyellow	GO BP term	GO:0030968	endoplasmic reticulum unfolded protein response	4	0.00173909	0.0250182
greenyellow	GO BP term	GO:0002070	epithelial cell maturation	2	0.00176196	0.0250182
greenyellow	GO BP term	GO:0018208	peptidyl-proline modification	3	0.00176993	0.0250182
greenyellow	GO BP term	GO:0031109	microtubule polymerization or depolymerization	4	0.00179186	0.025102
greenyellow	GO BP term	GO:0030308	negative regulation of cell growth	5	0.00187133	0.0259833
greenyellow	GO BP term	GO:0032210	regulation of telomere maintenance via telomerase	3	0.00195465	0.0269021
greenyellow	GO BP term	GO:2001239	regulation of extrinsic apoptotic signaling pathway in absence of ligand	3	0.00205134	0.0279874
greenyellow	GO BP term	GO:0032206	positive regulation of telomere maintenance	3	0.00215095	0.0290935
greenyellow	GO BP term	GO:0070424	regulation of nucleotide-binding oligomerization domain containing signaling pathway	2	0.00226976	0.0299264
greenyellow	GO BP term	GO:0097201	negative regulation of transcription from RNA polymerase II promoter in response to stress	2	0.00226976	0.0299264
greenyellow	GO BP term	GO:1903265	positive regulation of tumor necrosis factor-mediated signaling pathway	2	0.00226976	0.0299264
greenyellow	GO BP term	GO:0036498	IRE1-mediated unfolded protein response	3	0.00246767	0.0322648
greenyellow	GO BP term	GO:0090151	establishment of protein localization to mitochondrial membrane	2	0.00254653	0.0330207
greenyellow	GO BP term	GO:1900180	regulation of protein localization to nucleus	4	0.00265173	0.034103
greenyellow	GO BP term	GO:0051052	regulation of DNA metabolic process	7	0.00269646	0.0343963
greenyellow	GO BP term	GO:1904356	regulation of telomere maintenance via telomere lengthening	3	0.00293276	0.0371089
greenyellow	GO BP term	GO:0043555	regulation of translation in response to stress	2	0.0031452	0.0394785
greenyellow	GO BP term	GO:0070059	intrinsic apoptotic signaling pathway in response to endoplasmic reticulum stress	3	0.00318415	0.0396502
greenyellow	GO BP term	GO:1903829	positive regulation of cellular protein localization	6	0.00325592	0.0402247
greenyellow	GO BP term	GO:0060249	anatomical structure homeostasis	7	0.00339506	0.0415225
greenyellow	GO BP term	GO:0010042	response to manganese ion	2	0.00346683	0.0415225
greenyellow	GO BP term	GO:0036499	PERK-mediated unfolded protein response	2	0.00346683	0.0415225
greenyellow	GO BP term	GO:0070431	nucleotide-binding oligomerization domain containing 2 signaling pathway	2	0.00346683	0.0415225
greenyellow	GO BP term	GO:0071496	cellular response to external stimulus	6	0.00349435	0.0415352
greenyellow	GO BP term	GO:0030199	collagen fibril organization	3	0.00358537	0.0422966
greenyellow	GO BP term	GO:0019058	viral life cycle	6	0.0037974	0.0444636
greenyellow	GO BP term	GO:0097191	extrinsic apoptotic signaling pathway	5	0.00397465	0.0461942
greenyellow	GO BP term	GO:0030518	intracellular steroid hormone receptor signaling pathway	4	0.00403219	0.0465185
greenyellow	GO BP term	GO:0030521	androgen receptor signaling pathway	3	0.00432014	0.0494766
greenyellow	KEGG pathway	hsa04141	Protein processing in endoplasmic reticulum	25	6.12478e-21	5.57355e-19
greenyellow	KEGG pathway	hsa03040	Spliceosome	15	1.35864e-11	6.1818e-10
greenyellow	KEGG pathway	hsa05134	Legionellosis	11	7.21199e-11	1.75855e-09
greenyellow	KEGG pathway	hsa04612	Antigen processing and presentation	14	7.72991e-11	1.75855e-09
greenyellow	KEGG pathway	hsa04213	Longevity regulating pathway - multiple species	11	6.33801e-10	1.15352e-08
greenyellow	KEGG pathway	hsa04010	MAPK signaling pathway	19	1.19478e-09	1.81209e-08
greenyellow	KEGG pathway	hsa04915	Estrogen signaling pathway	13	1.15415e-08	1.5004e-07
greenyellow	KEGG pathway	hsa05020	Prion diseases	8	1.60362e-08	1.82411e-07
greenyellow	KEGG pathway	hsa05162	Measles	9	3.21752e-05	0.000325327
greenyellow	KEGG pathway	hsa05145	Toxoplasmosis	9	5.42086e-05	0.000493298
greenyellow	KEGG pathway	hsa04144	Endocytosis	10	0.000642705	0.00531692
greenyellow	KEGG pathway	hsa04918	Thyroid hormone synthesis	5	0.00211396	0.0160309
greenyellow	KEGG pathway	hsa00310	Lysine degradation	4	0.0026818	0.0187726
magenta	GO BP term	GO:0010257	NADH dehydrogenase complex assembly	11	1.50658e-11	1.15329e-08
magenta	GO BP term	GO:0032981	mitochondrial respiratory chain complex I assembly	11	1.50658e-11	1.15329e-08
magenta	GO BP term	GO:0033108	mitochondrial respiratory chain complex assembly	12	3.94711e-11	2.01434e-08
magenta	GO BP term	GO:0070125	mitochondrial translational elongation	9	3.8951e-08	1.14352e-05
magenta	GO BP term	GO:0070126	mitochondrial translational termination	9	4.26249e-08	1.14352e-05
magenta	GO BP term	GO:0140053	mitochondrial gene expression	11	4.48146e-08	1.14352e-05
magenta	GO BP term	GO:0043624	cellular protein complex disassembly	12	8.94315e-08	1.78754e-05
magenta	GO BP term	GO:0006119	oxidative phosphorylation	10	9.4532e-08	1.78754e-05
magenta	GO BP term	GO:0032543	mitochondrial translation	10	1.07874e-07	1.78754e-05
magenta	GO BP term	GO:0006415	translational termination	9	1.16756e-07	1.78754e-05
magenta	GO BP term	GO:0032984	protein-containing complex disassembly	14	2.29559e-07	3.04311e-05
magenta	GO BP term	GO:0022900	electron transport chain	11	2.3852e-07	3.04311e-05
magenta	GO BP term	GO:0042775	mitochondrial ATP synthesis coupled electron transport	8	7.16657e-07	8.44002e-05
magenta	GO BP term	GO:0042773	ATP synthesis coupled electron transport	8	7.73529e-07	8.45909e-05
magenta	GO BP term	GO:0046755	viral budding	5	1.1386e-06	0.000116213
magenta	GO BP term	GO:0006414	translational elongation	9	1.29957e-06	0.000124353
magenta	GO BP term	GO:0022904	respiratory electron transport chain	8	2.52185e-06	0.000227115
magenta	GO BP term	GO:0006120	mitochondrial electron transport, NADH to ubiquinone	6	7.32655e-06	0.000623164
magenta	GO BP term	GO:0019068	virion assembly	5	9.23117e-06	0.000743838
magenta	GO BP term	GO:0009205	purine ribonucleoside triphosphate metabolic process	11	1.71803e-05	0.00129632
magenta	GO BP term	GO:0006091	generation of precursor metabolites and energy	14	1.7781e-05	0.00129632
magenta	GO BP term	GO:0009199	ribonucleoside triphosphate metabolic process	11	2.05349e-05	0.00139456
magenta	GO BP term	GO:0009144	purine nucleoside triphosphate metabolic process	11	2.11458e-05	0.00139456
magenta	GO BP term	GO:0039702	viral budding via host ESCRT complex	4	2.18611e-05	0.00139456
magenta	GO BP term	GO:0007032	endosome organization	6	3.29084e-05	0.00201531
magenta	GO BP term	GO:0009141	nucleoside triphosphate metabolic process	11	3.71421e-05	0.0021871
magenta	GO BP term	GO:0046034	ATP metabolic process	10	4.06496e-05	0.00230498
magenta	GO BP term	GO:0006914	autophagy	13	8.10055e-05	0.00427653
magenta	GO BP term	GO:0061919	process utilizing autophagic mechanism	13	8.10055e-05	0.00427653
magenta	GO BP term	GO:0036258	multivesicular body assembly	4	8.4348e-05	0.00428969
magenta	GO BP term	GO:0045732	positive regulation of protein catabolic process	9	8.76964e-05	0.00428969
magenta	GO BP term	GO:0045333	cellular respiration	8	8.96604e-05	0.00428969
magenta	GO BP term	GO:0036257	multivesicular body organization	4	9.54385e-05	0.00442777
magenta	GO BP term	GO:0009167	purine ribonucleoside monophosphate metabolic process	10	0.000120517	0.00540874
magenta	GO BP term	GO:0009126	purine nucleoside monophosphate metabolic process	10	0.000123649	0.00540874
magenta	GO BP term	GO:0009896	positive regulation of catabolic process	12	0.00012888	0.00548096
magenta	GO BP term	GO:0009161	ribonucleoside monophosphate metabolic process	10	0.000171053	0.00707789
magenta	GO BP term	GO:0000377	RNA splicing, via transesterification reactions with bulged adenosine as nucleophile	11	0.000245949	0.00965508
magenta	GO BP term	GO:0000398	mRNA splicing, via spliceosome	11	0.000245949	0.00965508
magenta	GO BP term	GO:0000375	RNA splicing, via transesterification reactions	11	0.000261565	0.0100114
magenta	GO BP term	GO:0016197	endosomal transport	8	0.000289237	0.0106608
magenta	GO BP term	GO:0009123	nucleoside monophosphate metabolic process	10	0.000292459	0.0106608
magenta	GO BP term	GO:0006368	transcription elongation from RNA polymerase II promoter	5	0.000806769	0.0287247
magenta	GO BP term	GO:0016073	snRNA metabolic process	5	0.000923218	0.0321238
magenta	GO BP term	GO:0032509	endosome transport via multivesicular body sorting pathway	3	0.00098664	0.0335677
magenta	GO BP term	GO:0042176	regulation of protein catabolic process	10	0.00119277	0.0380715
magenta	GO BP term	GO:0098781	ncRNA transcription	5	0.00119307	0.0380715
magenta	GO BP term	GO:0015980	energy derivation by oxidation of organic compounds	8	0.00121192	0.0380715
magenta	GO BP term	GO:0006352	DNA-templated transcription, initiation	8	0.00123922	0.0380715
magenta	GO BP term	GO:1902750	negative regulation of cell cycle G2/M phase transition	4	0.00124335	0.0380715
magenta	KEGG pathway	hsa00190	Oxidative phosphorylation	18	5.82369e-14	7.45432e-12
magenta	KEGG pathway	hsa05016	Huntington disease	20	1.38568e-13	8.86837e-12
magenta	KEGG pathway	hsa05012	Parkinson disease	18	2.79897e-13	1.19423e-11
magenta	KEGG pathway	hsa05010	Alzheimer disease	18	4.26669e-12	1.19863e-10
magenta	KEGG pathway	hsa04932	Non-alcoholic fatty liver disease (NAFLD)	17	4.68216e-12	1.19863e-10
magenta	KEGG pathway	hsa04714	Thermogenesis	20	8.91044e-12	1.90089e-10
magenta	KEGG pathway	hsa04723	Retrograde endocannabinoid signaling	14	4.31244e-09	7.8856e-08
magenta	KEGG pathway	hsa03040	Spliceosome	8	0.000173309	0.00277295
magenta	KEGG pathway	hsa04140	Autophagy - animal	7	0.00142642	0.0202868
magenta	KEGG pathway	hsa04260	Cardiac muscle contraction	5	0.00215432	0.0275753
magenta	KEGG pathway	hsa04144	Endocytosis	9	0.00395414	0.0460118
magenta	KEGG pathway	hsa03010	Ribosome	6	0.00453143	0.0483352
pink	GO BP term	GO:0045047	protein targeting to ER	20	5.61619e-18	1.14646e-14
pink	GO BP term	GO:0072599	establishment of protein localization to endoplasmic reticulum	20	1.02206e-17	1.14646e-14
pink	GO BP term	GO:0006614	SRP-dependent cotranslational protein targeting to membrane	19	1.45736e-17	1.14646e-14
pink	GO BP term	GO:0006613	cotranslational protein targeting to membrane	19	2.74505e-17	1.5086e-14
pink	GO BP term	GO:0000184	nuclear-transcribed mRNA catabolic process, nonsense-mediated decay	20	3.19619e-17	1.5086e-14
pink	GO BP term	GO:0070972	protein localization to endoplasmic reticulum	20	2.89123e-16	1.08458e-13
pink	GO BP term	GO:0090150	establishment of protein localization to membrane	27	3.21698e-16	1.08458e-13
pink	GO BP term	GO:0006413	translational initiation	22	9.55384e-16	2.81838e-13
pink	GO BP term	GO:0006605	protein targeting	28	3.27556e-14	8.58926e-12
pink	GO BP term	GO:0006612	protein targeting to membrane	20	1.06445e-13	2.5121e-11
pink	GO BP term	GO:0000956	nuclear-transcribed mRNA catabolic process	20	1.4504e-12	3.11177e-10
pink	GO BP term	GO:0006401	RNA catabolic process	21	6.89708e-10	1.35643e-07
pink	GO BP term	GO:0006402	mRNA catabolic process	20	9.32074e-10	1.69207e-07
pink	GO BP term	GO:0002181	cytoplasmic translation	10	5.18285e-08	8.73681e-06
pink	GO BP term	GO:0000028	ribosomal small subunit assembly	5	3.98623e-07	6.27167e-05
pink	GO BP term	GO:0016072	rRNA metabolic process	13	3.72877e-06	0.000549993
pink	GO BP term	GO:0042274	ribosomal small subunit biogenesis	7	6.7539e-06	0.0009376
pink	GO BP term	GO:0042254	ribosome biogenesis	13	1.7092e-05	0.00224095
pink	GO BP term	GO:0006364	rRNA processing	11	2.41773e-05	0.00300308
pink	GO BP term	GO:0016575	histone deacetylation	7	3.06861e-05	0.00362096
pink	GO BP term	GO:0034976	response to endoplasmic reticulum stress	12	4.70308e-05	0.00528536
pink	GO BP term	GO:0006476	protein deacetylation	7	9.52256e-05	0.0102151
pink	GO BP term	GO:0006414	translational elongation	8	0.000120702	0.0123851
pink	GO BP term	GO:0035601	protein deacylation	7	0.000168402	0.0165595
pink	GO BP term	GO:0006282	regulation of DNA repair	7	0.000197556	0.0186493
pink	GO BP term	GO:0008630	intrinsic apoptotic signaling pathway in response to DNA damage	7	0.000230656	0.0209365
pink	GO BP term	GO:0098732	macromolecule deacylation	7	0.000255105	0.0222981
pink	GO BP term	GO:0000377	RNA splicing, via transesterification reactions with bulged adenosine as nucleophile	13	0.000321372	0.026153
pink	GO BP term	GO:0000398	mRNA splicing, via spliceosome	13	0.000321372	0.026153
pink	GO BP term	GO:0006367	transcription initiation from RNA polymerase II promoter	9	0.000337247	0.0262048
pink	GO BP term	GO:0000375	RNA splicing, via transesterification reactions	13	0.000344216	0.0262048
pink	GO BP term	GO:0045824	negative regulation of innate immune response	5	0.00037556	0.0276976
pink	GO BP term	GO:0042255	ribosome assembly	5	0.000405188	0.0289771
pink	GO BP term	GO:0001959	regulation of cytokine-mediated signaling pathway	8	0.000598996	0.0415774
pink	GO BP term	GO:0036503	ERAD pathway	6	0.000657099	0.0443073
pink	GO BP term	GO:0007006	mitochondrial membrane organization	7	0.000716926	0.0469985
pink	KEGG pathway	hsa03010	Ribosome	28	1.28432e-21	1.96502e-19
purple	GO BP term	GO:0046651	lymphocyte proliferation	25	5.36283e-21	5.63499e-18
purple	GO BP term	GO:0032943	mononuclear cell proliferation	25	6.20594e-21	5.63499e-18
purple	GO BP term	GO:0070661	leukocyte proliferation	25	2.37272e-20	1.43629e-17
purple	GO BP term	GO:0002696	positive regulation of leukocyte activation	24	8.29262e-19	3.76485e-16
purple	GO BP term	GO:0050867	positive regulation of cell activation	24	1.8531e-18	6.73048e-16
purple	GO BP term	GO:0051249	regulation of lymphocyte activation	26	5.58191e-18	1.49374e-15
purple	GO BP term	GO:0050670	regulation of lymphocyte proliferation	21	6.10571e-18	1.49374e-15
purple	GO BP term	GO:0032944	regulation of mononuclear cell proliferation	21	6.58035e-18	1.49374e-15
purple	GO BP term	GO:0007159	leukocyte cell-cell adhesion	24	9.48415e-18	1.91369e-15
purple	GO BP term	GO:0070663	regulation of leukocyte proliferation	21	1.57952e-17	2.86841e-15
purple	GO BP term	GO:0042098	T cell proliferation	19	1.2276e-16	2.02666e-14
purple	GO BP term	GO:0042089	cytokine biosynthetic process	15	7.73003e-16	1.16981e-13
purple	GO BP term	GO:0042107	cytokine metabolic process	15	8.70579e-16	1.21613e-13
purple	GO BP term	GO:1903037	regulation of leukocyte cell-cell adhesion	21	3.12074e-15	3.78921e-13
purple	GO BP term	GO:1903039	positive regulation of leukocyte cell-cell adhesion	19	3.21763e-15	3.78921e-13
purple	GO BP term	GO:0051251	positive regulation of lymphocyte activation	20	3.33851e-15	3.78921e-13
purple	GO BP term	GO:0042035	regulation of cytokine biosynthetic process	14	4.90263e-15	5.23716e-13
purple	GO BP term	GO:0050863	regulation of T cell activation	21	5.55477e-15	5.60415e-13
purple	GO BP term	GO:0042108	positive regulation of cytokine biosynthetic process	12	1.21015e-14	1.15665e-12
purple	GO BP term	GO:0050870	positive regulation of T cell activation	18	1.31316e-14	1.19235e-12
purple	GO BP term	GO:0022409	positive regulation of cell-cell adhesion	19	5.18874e-14	4.48703e-12
purple	GO BP term	GO:0042102	positive regulation of T cell proliferation	14	9.46518e-14	7.54349e-12
purple	GO BP term	GO:0042129	regulation of T cell proliferation	16	9.55397e-14	7.54349e-12
purple	GO BP term	GO:0050671	positive regulation of lymphocyte proliferation	15	1.19238e-13	9.02236e-12
purple	GO BP term	GO:0032946	positive regulation of mononuclear cell proliferation	15	1.29462e-13	9.40415e-12
purple	GO BP term	GO:0070665	positive regulation of leukocyte proliferation	15	2.09903e-13	1.46609e-11
purple	GO BP term	GO:0022407	regulation of cell-cell adhesion	21	6.19609e-13	4.16744e-11
purple	GO BP term	GO:0002695	negative regulation of leukocyte activation	15	9.35738e-13	6.06893e-11
purple	GO BP term	GO:0050866	negative regulation of cell activation	15	3.5813e-12	2.24263e-10
purple	GO BP term	GO:0045785	positive regulation of cell adhesion	20	4.53855e-12	2.60491e-10
purple	GO BP term	GO:0050900	leukocyte migration	20	4.53855e-12	2.60491e-10
purple	GO BP term	GO:0006909	phagocytosis	16	4.59014e-12	2.60491e-10
purple	GO BP term	GO:0042116	macrophage activation	11	3.0782e-11	1.69394e-09
purple	GO BP term	GO:0050851	antigen receptor-mediated signaling pathway	15	4.53197e-11	2.42061e-09
purple	GO BP term	GO:0032103	positive regulation of response to external stimulus	16	2.09793e-10	1.08853e-08
purple	GO BP term	GO:0030098	lymphocyte differentiation	16	4.68376e-10	2.3627e-08
purple	GO BP term	GO:0002429	immune response-activating cell surface receptor signaling pathway	17	5.50931e-10	2.70403e-08
purple	GO BP term	GO:0043313	regulation of neutrophil degranulation	5	1.42707e-09	6.81991e-08
purple	GO BP term	GO:1903557	positive regulation of tumor necrosis factor superfamily cytokine production	9	2.42877e-09	1.13093e-07
purple	GO BP term	GO:1902105	regulation of leukocyte differentiation	14	3.35999e-09	1.52544e-07
purple	GO BP term	GO:0002218	activation of innate immune response	14	4.11794e-09	1.82395e-07
purple	GO BP term	GO:0051250	negative regulation of lymphocyte activation	11	5.54219e-09	2.39634e-07
purple	GO BP term	GO:0150076	neuroinflammatory response	8	6.63382e-09	2.80163e-07
purple	GO BP term	GO:0050852	T cell receptor signaling pathway	12	6.97009e-09	2.87675e-07
purple	GO BP term	GO:1902563	regulation of neutrophil activation	5	7.18834e-09	2.9009e-07
purple	GO BP term	GO:0071216	cellular response to biotic stimulus	13	8.07362e-09	3.18733e-07
purple	GO BP term	GO:0032609	interferon-gamma production	10	1.08759e-08	4.20227e-07
purple	GO BP term	GO:0006911	phagocytosis, engulfment	7	1.22821e-08	4.58739e-07
purple	GO BP term	GO:0045619	regulation of lymphocyte differentiation	11	1.23779e-08	4.58739e-07
purple	GO BP term	GO:0045577	regulation of B cell differentiation	6	1.36213e-08	4.94725e-07
purple	GO BP term	GO:0045058	T cell selection	7	1.4214e-08	5.06129e-07
purple	GO BP term	GO:0030099	myeloid cell differentiation	16	1.46743e-08	5.12472e-07
purple	GO BP term	GO:0045621	positive regulation of lymphocyte differentiation	9	1.57125e-08	5.38377e-07
purple	GO BP term	GO:1903706	regulation of hemopoiesis	16	1.60221e-08	5.38816e-07
purple	GO BP term	GO:0002758	innate immune response-activating signal transduction	13	1.69884e-08	5.56559e-07
purple	GO BP term	GO:0032635	interleukin-6 production	10	1.71626e-08	5.56559e-07
purple	GO BP term	GO:0002224	toll-like receptor signaling pathway	10	1.9468e-08	6.20244e-07
purple	GO BP term	GO:0002886	regulation of myeloid leukocyte mediated immunity	7	2.47286e-08	7.68045e-07
purple	GO BP term	GO:0050864	regulation of B cell activation	9	2.4953e-08	7.68045e-07
purple	GO BP term	GO:0001774	microglial cell activation	7	3.2077e-08	9.54949e-07
purple	GO BP term	GO:0002269	leukocyte activation involved in inflammatory response	7	3.2077e-08	9.54949e-07
purple	GO BP term	GO:0030217	T cell differentiation	12	3.62919e-08	1.063e-06
purple	GO BP term	GO:0032760	positive regulation of tumor necrosis factor production	8	3.78598e-08	1.09133e-06
purple	GO BP term	GO:0099024	plasma membrane invagination	7	4.11944e-08	1.16889e-06
purple	GO BP term	GO:1903555	regulation of tumor necrosis factor superfamily cytokine production	10	4.74335e-08	1.32522e-06
purple	GO BP term	GO:0032729	positive regulation of interferon-gamma production	8	4.9509e-08	1.36225e-06
purple	GO BP term	GO:0032649	regulation of interferon-gamma production	9	5.10389e-08	1.38338e-06
purple	GO BP term	GO:0002221	pattern recognition receptor signaling pathway	11	5.38866e-08	1.43909e-06
purple	GO BP term	GO:0071706	tumor necrosis factor superfamily cytokine production	10	5.92574e-08	1.53731e-06
purple	GO BP term	GO:1902107	positive regulation of leukocyte differentiation	10	5.92574e-08	1.53731e-06
purple	GO BP term	GO:0002291	T cell activation via T cell receptor contact with antigen bound to MHC molecule on antigen presenting cell	5	6.31786e-08	1.61595e-06
purple	GO BP term	GO:1903708	positive regulation of hemopoiesis	11	6.48683e-08	1.63612e-06
purple	GO BP term	GO:0030888	regulation of B cell proliferation	7	6.61137e-08	1.64469e-06
purple	GO BP term	GO:0061900	glial cell activation	7	7.40262e-08	1.75495e-06
purple	GO BP term	GO:0032945	negative regulation of mononuclear cell proliferation	8	7.5803e-08	1.75495e-06
purple	GO BP term	GO:0042100	B cell proliferation	8	7.5803e-08	1.75495e-06
purple	GO BP term	GO:0050672	negative regulation of lymphocyte proliferation	8	7.5803e-08	1.75495e-06
purple	GO BP term	GO:0002755	MyD88-dependent toll-like receptor signaling pathway	6	7.58932e-08	1.75495e-06
purple	GO BP term	GO:0045089	positive regulation of innate immune response	14	7.63441e-08	1.75495e-06
purple	GO BP term	GO:0071621	granulocyte chemotaxis	9	8.12386e-08	1.84412e-06
purple	GO BP term	GO:0045088	regulation of innate immune response	15	1.11105e-07	2.46732e-06
purple	GO BP term	GO:0032675	regulation of interleukin-6 production	9	1.1141e-07	2.46732e-06
purple	GO BP term	GO:0002495	antigen processing and presentation of peptide antigen via MHC class II	10	1.23666e-07	2.70575e-06
purple	GO BP term	GO:0010324	membrane invagination	7	1.26671e-07	2.73851e-06
purple	GO BP term	GO:0002504	antigen processing and presentation of peptide or polysaccharide antigen via MHC class II	10	1.30027e-07	2.77798e-06
purple	GO BP term	GO:0070664	negative regulation of leukocyte proliferation	8	1.32265e-07	2.79294e-06
purple	GO BP term	GO:0002285	lymphocyte activation involved in immune response	10	1.36674e-07	2.82859e-06
purple	GO BP term	GO:0042113	B cell activation	11	1.37068e-07	2.82859e-06
purple	GO BP term	GO:0042094	interleukin-2 biosynthetic process	5	1.79494e-07	3.6328e-06
purple	GO BP term	GO:0002687	positive regulation of leukocyte migration	9	1.8004e-07	3.6328e-06
purple	GO BP term	GO:0002703	regulation of leukocyte mediated immunity	12	1.84273e-07	3.67737e-06
purple	GO BP term	GO:0043300	regulation of leukocyte degranulation	6	1.8868e-07	3.72437e-06
purple	GO BP term	GO:0097530	granulocyte migration	9	2.02074e-07	3.94588e-06
purple	GO BP term	GO:0002699	positive regulation of immune effector process	12	2.19736e-07	4.24511e-06
purple	GO BP term	GO:0071219	cellular response to molecule of bacterial origin	11	2.73239e-07	5.22317e-06
purple	GO BP term	GO:0050727	regulation of inflammatory response	14	2.80266e-07	5.3017e-06
purple	GO BP term	GO:0002286	T cell activation involved in immune response	8	2.92851e-07	5.48265e-06
purple	GO BP term	GO:0050871	positive regulation of B cell activation	7	3.29224e-07	6.08878e-06
purple	GO BP term	GO:0046645	positive regulation of gamma-delta T cell activation	4	3.33332e-07	6.08878e-06
purple	GO BP term	GO:0030593	neutrophil chemotaxis	8	3.35285e-07	6.08878e-06
purple	GO BP term	GO:0045580	regulation of T cell differentiation	9	3.51113e-07	6.31308e-06
purple	GO BP term	GO:0046631	alpha-beta T cell activation	9	4.11294e-07	7.32264e-06
purple	GO BP term	GO:0032680	regulation of tumor necrosis factor production	9	4.56214e-07	8.04355e-06
purple	GO BP term	GO:0032640	tumor necrosis factor production	9	5.05329e-07	8.82383e-06
purple	GO BP term	GO:0050729	positive regulation of inflammatory response	9	5.87583e-07	1.00788e-05
purple	GO BP term	GO:0046456	icosanoid biosynthetic process	6	5.88301e-07	1.00788e-05
purple	GO BP term	GO:0002888	positive regulation of myeloid leukocyte mediated immunity	5	6.16248e-07	1.04589e-05
purple	GO BP term	GO:0045579	positive regulation of B cell differentiation	4	7.15816e-07	1.18452e-05
purple	GO BP term	GO:0046643	regulation of gamma-delta T cell activation	4	7.15816e-07	1.18452e-05
purple	GO BP term	GO:1990266	neutrophil migration	8	7.17498e-07	1.18452e-05
purple	GO BP term	GO:0097529	myeloid leukocyte migration	10	8.77726e-07	1.43599e-05
purple	GO BP term	GO:0045086	positive regulation of interleukin-2 biosynthetic process	4	9.9769e-07	1.61768e-05
purple	GO BP term	GO:0045576	mast cell activation	6	1.01322e-06	1.62832e-05
purple	GO BP term	GO:0002573	myeloid leukocyte differentiation	10	1.2433e-06	1.98056e-05
purple	GO BP term	GO:0045408	regulation of interleukin-6 biosynthetic process	4	1.35444e-06	2.13884e-05
purple	GO BP term	GO:0042554	superoxide anion generation	5	1.41115e-06	2.20918e-05
purple	GO BP term	GO:0032602	chemokine production	7	1.67954e-06	2.58479e-05
purple	GO BP term	GO:0045582	positive regulation of T cell differentiation	7	1.67954e-06	2.58479e-05
purple	GO BP term	GO:0001818	negative regulation of cytokine production	11	1.91365e-06	2.92032e-05
purple	GO BP term	GO:0030595	leukocyte chemotaxis	10	2.22789e-06	3.37154e-05
purple	GO BP term	GO:0042226	interleukin-6 biosynthetic process	4	2.34066e-06	3.51293e-05
purple	GO BP term	GO:0050730	regulation of peptidyl-tyrosine phosphorylation	10	2.4737e-06	3.68216e-05
purple	GO BP term	GO:0032722	positive regulation of chemokine production	6	2.6147e-06	3.82926e-05
purple	GO BP term	GO:0046635	positive regulation of alpha-beta T cell activation	6	2.6147e-06	3.82926e-05
purple	GO BP term	GO:0050764	regulation of phagocytosis	7	2.65981e-06	3.86417e-05
purple	GO BP term	GO:0050663	cytokine secretion	10	2.74277e-06	3.95308e-05
purple	GO BP term	GO:0032623	interleukin-2 production	6	2.85035e-06	4.07578e-05
purple	GO BP term	GO:0043030	regulation of macrophage activation	6	3.10303e-06	4.40242e-05
purple	GO BP term	GO:0046633	alpha-beta T cell proliferation	5	3.24637e-06	4.57009e-05
purple	GO BP term	GO:0007229	integrin-mediated signaling pathway	7	3.40798e-06	4.76069e-05
purple	GO BP term	GO:0002237	response to molecule of bacterial origin	12	3.59758e-06	4.98718e-05
purple	GO BP term	GO:0002685	regulation of leukocyte migration	9	4.15193e-06	5.71204e-05
purple	GO BP term	GO:0045076	regulation of interleukin-2 biosynthetic process	4	4.70174e-06	6.39028e-05
purple	GO BP term	GO:0018108	peptidyl-tyrosine phosphorylation	12	4.7387e-06	6.39028e-05
purple	GO BP term	GO:0060326	cell chemotaxis	11	4.75048e-06	6.39028e-05
purple	GO BP term	GO:0018212	peptidyl-tyrosine modification	12	5.10061e-06	6.81082e-05
purple	GO BP term	GO:0046634	regulation of alpha-beta T cell activation	7	5.43663e-06	7.20651e-05
purple	GO BP term	GO:0042095	interferon-gamma biosynthetic process	4	5.78226e-06	7.55438e-05
purple	GO BP term	GO:0043302	positive regulation of leukocyte degranulation	4	5.78226e-06	7.55438e-05
purple	GO BP term	GO:0043303	mast cell degranulation	5	5.89101e-06	7.64148e-05
purple	GO BP term	GO:0002532	production of molecular mediator involved in inflammatory response	6	6.30728e-06	8.12342e-05
purple	GO BP term	GO:0048002	antigen processing and presentation of peptide antigen	10	6.35811e-06	8.13121e-05
purple	GO BP term	GO:0002279	mast cell activation involved in immune response	5	6.57918e-06	8.3551e-05
purple	GO BP term	GO:0006801	superoxide metabolic process	6	6.78689e-06	8.55902e-05
purple	GO BP term	GO:0045061	thymic T cell selection	4	7.03584e-06	8.81179e-05
purple	GO BP term	GO:0050766	positive regulation of phagocytosis	6	7.29566e-06	9.05372e-05
purple	GO BP term	GO:0002448	mast cell mediated immunity	5	7.32872e-06	9.05372e-05
purple	GO BP term	GO:0002819	regulation of adaptive immune response	9	8.85452e-06	0.000107918
purple	GO BP term	GO:0050707	regulation of cytokine secretion	9	8.85452e-06	0.000107918
purple	GO BP term	GO:0032677	regulation of interleukin-8 production	6	9.64965e-06	0.000116825
purple	GO BP term	GO:0030183	B cell differentiation	7	9.78414e-06	0.000117669
purple	GO BP term	GO:0019886	antigen processing and presentation of exogenous peptide antigen via MHC class II	8	1.09489e-05	0.00013081
purple	GO BP term	GO:0042533	tumor necrosis factor biosynthetic process	4	1.2006e-05	0.000141578
purple	GO BP term	GO:0042534	regulation of tumor necrosis factor biosynthetic process	4	1.2006e-05	0.000141578
purple	GO BP term	GO:0032479	regulation of type I interferon production	7	1.38216e-05	0.000161935
purple	GO BP term	GO:0001516	prostaglandin biosynthetic process	4	1.4126e-05	0.00016236
purple	GO BP term	GO:0046457	prostanoid biosynthetic process	4	1.4126e-05	0.00016236
purple	GO BP term	GO:0046641	positive regulation of alpha-beta T cell proliferation	4	1.4126e-05	0.00016236
purple	GO BP term	GO:0032642	regulation of chemokine production	6	1.43004e-05	0.00016333
purple	GO BP term	GO:0032606	type I interferon production	7	1.44971e-05	0.000164543
purple	GO BP term	GO:0071346	cellular response to interferon-gamma	10	1.46993e-05	0.000165801
purple	GO BP term	GO:0042742	defense response to bacterium	10	1.77511e-05	0.000198987
purple	GO BP term	GO:0050731	positive regulation of peptidyl-tyrosine phosphorylation	8	1.80071e-05	0.000200619
purple	GO BP term	GO:0032637	interleukin-8 production	6	1.83007e-05	0.000201419
purple	GO BP term	GO:0032755	positive regulation of interleukin-6 production	6	1.83007e-05	0.000201419
purple	GO BP term	GO:0042492	gamma-delta T cell differentiation	3	2.16463e-05	0.000236806
purple	GO BP term	GO:0050853	B cell receptor signaling pathway	5	2.2639e-05	0.000246182
purple	GO BP term	GO:0019882	antigen processing and presentation	10	2.42572e-05	0.000262209
purple	GO BP term	GO:0032663	regulation of interleukin-2 production	5	2.45842e-05	0.000264171
purple	GO BP term	GO:0050869	negative regulation of B cell activation	4	2.54385e-05	0.000271743
purple	GO BP term	GO:0060333	interferon-gamma-mediated signaling pathway	8	2.66559e-05	0.000281447
purple	GO BP term	GO:0032648	regulation of interferon-beta production	5	2.66569e-05	0.000281447
purple	GO BP term	GO:0034341	response to interferon-gamma	10	2.89254e-05	0.000301743
purple	GO BP term	GO:0032743	positive regulation of interleukin-2 production	4	2.90777e-05	0.000301743
purple	GO BP term	GO:0046629	gamma-delta T cell activation	4	2.90777e-05	0.000301743
purple	GO BP term	GO:0051090	regulation of DNA-binding transcription factor activity	12	2.9407e-05	0.000303427
purple	GO BP term	GO:0019371	cyclooxygenase pathway	3	2.96387e-05	0.00030409
purple	GO BP term	GO:1901570	fatty acid derivative biosynthetic process	6	3.06369e-05	0.000312565
purple	GO BP term	GO:0032608	interferon-beta production	5	3.12076e-05	0.000316609
purple	GO BP term	GO:0002577	regulation of antigen processing and presentation	4	3.30844e-05	0.000331941
purple	GO BP term	GO:0043032	positive regulation of macrophage activation	4	3.30844e-05	0.000331941
purple	GO BP term	GO:0002440	production of molecular mediator of immune response	8	3.49332e-05	0.000348564
purple	GO BP term	GO:0032647	regulation of interferon-alpha production	4	3.7481e-05	0.000371942
purple	GO BP term	GO:0045637	regulation of myeloid cell differentiation	9	3.84953e-05	0.000379932
purple	GO BP term	GO:0033004	negative regulation of mast cell activation	3	3.93524e-05	0.00038216
purple	GO BP term	GO:0042535	positive regulation of tumor necrosis factor biosynthetic process	3	3.93524e-05	0.00038216
purple	GO BP term	GO:0045060	negative thymic T cell selection	3	3.93524e-05	0.00038216
purple	GO BP term	GO:0045123	cellular extravasation	5	4.21012e-05	0.000406345
purple	GO BP term	GO:0032607	interferon-alpha production	4	4.22903e-05	0.000406345
purple	GO BP term	GO:0032418	lysosome localization	5	4.85464e-05	0.000464001
purple	GO BP term	GO:0002460	adaptive immune response based on somatic recombination of immune receptors built from immunoglobulin superfamily domains	10	4.89436e-05	0.000465348
purple	GO BP term	GO:0001771	immunological synapse formation	3	5.09433e-05	0.000481839
purple	GO BP term	GO:0030224	monocyte differentiation	4	5.94299e-05	0.000549543
purple	GO BP term	GO:0043368	positive T cell selection	4	5.94299e-05	0.000549543
purple	GO BP term	GO:0046640	regulation of alpha-beta T cell proliferation	4	5.94299e-05	0.000549543
purple	GO BP term	GO:1903131	mononuclear cell differentiation	4	5.94299e-05	0.000549543
purple	GO BP term	GO:0072678	T cell migration	5	5.96146e-05	0.000549543
purple	GO BP term	GO:0043383	negative T cell selection	3	6.45649e-05	0.000589195
purple	GO BP term	GO:0045059	positive thymic T cell selection	3	6.45649e-05	0.000589195
purple	GO BP term	GO:2000406	positive regulation of T cell migration	4	6.61277e-05	0.000600439
purple	GO BP term	GO:0032655	regulation of interleukin-12 production	5	7.25358e-05	0.000655348
purple	GO BP term	GO:0033003	regulation of mast cell activation	4	7.3359e-05	0.000659505
purple	GO BP term	GO:0002586	regulation of antigen processing and presentation of peptide antigen via MHC class II	3	8.03675e-05	0.000708482
purple	GO BP term	GO:0002830	positive regulation of type 2 immune response	3	8.03675e-05	0.000708482
purple	GO BP term	GO:0032490	detection of molecule of bacterial origin	3	8.03675e-05	0.000708482
purple	GO BP term	GO:0032645	regulation of granulocyte macrophage colony-stimulating factor production	3	8.03675e-05	0.000708482
purple	GO BP term	GO:0150077	regulation of neuroinflammatory response	4	8.11493e-05	0.000711918
purple	GO BP term	GO:0032615	interleukin-12 production	5	8.22799e-05	0.000718159
purple	GO BP term	GO:0045807	positive regulation of endocytosis	7	8.3047e-05	0.000718159
purple	GO BP term	GO:0051092	positive regulation of NF-kappaB transcription factor activity	7	8.3047e-05	0.000718159
purple	GO BP term	GO:0045671	negative regulation of osteoclast differentiation	4	8.95243e-05	0.000770503
purple	GO BP term	GO:0071222	cellular response to lipopolysaccharide	8	9.5248e-05	0.000815898
purple	GO BP term	GO:0006690	icosanoid metabolic process	6	9.79129e-05	0.000824398
purple	GO BP term	GO:0002580	regulation of antigen processing and presentation of peptide or polysaccharide antigen via MHC class II	3	9.84989e-05	0.000824398
purple	GO BP term	GO:0030889	negative regulation of B cell proliferation	3	9.84989e-05	0.000824398
purple	GO BP term	GO:2001188	regulation of T cell activation via T cell receptor contact with antigen bound to MHC molecule on antigen presenting cell	3	9.84989e-05	0.000824398
purple	GO BP term	GO:0030890	positive regulation of B cell proliferation	4	9.85102e-05	0.000824398
purple	GO BP term	GO:0030316	osteoclast differentiation	6	0.000102212	0.000847565
purple	GO BP term	GO:0072676	lymphocyte migration	6	0.000102212	0.000847565
purple	GO BP term	GO:0071622	regulation of granulocyte chemotaxis	4	0.000108133	0.000892592
purple	GO BP term	GO:0050868	negative regulation of T cell activation	6	0.000116016	0.000953328
purple	GO BP term	GO:0006692	prostanoid metabolic process	4	0.000118421	0.000964358
purple	GO BP term	GO:0006693	prostaglandin metabolic process	4	0.000118421	0.000964358
purple	GO BP term	GO:0002583	regulation of antigen processing and presentation of peptide antigen	3	0.000119104	0.000965595
purple	GO BP term	GO:0002761	regulation of myeloid leukocyte differentiation	6	0.000142278	0.00114834
purple	GO BP term	GO:0051607	defense response to virus	8	0.000146579	0.00117782
purple	GO BP term	GO:0046638	positive regulation of alpha-beta T cell differentiation	4	0.00015354	0.00122832
purple	GO BP term	GO:1901224	positive regulation of NIK/NF-kappaB signaling	5	0.000155146	0.00123572
purple	GO BP term	GO:2000403	positive regulation of lymphocyte migration	4	0.000166758	0.00132241
purple	GO BP term	GO:0032604	granulocyte macrophage colony-stimulating factor production	3	0.000168304	0.00132887
purple	GO BP term	GO:0006636	unsaturated fatty acid biosynthetic process	4	0.000180778	0.00141506
purple	GO BP term	GO:2000404	regulation of T cell migration	4	0.000180778	0.00141506
purple	GO BP term	GO:0002478	antigen processing and presentation of exogenous peptide antigen	8	0.000188939	0.00147259
purple	GO BP term	GO:0002718	regulation of cytokine production involved in immune response	5	0.000191229	0.00148407
purple	GO BP term	GO:0045072	regulation of interferon-gamma biosynthetic process	3	0.000197174	0.0015237
purple	GO BP term	GO:0002705	positive regulation of leukocyte mediated immunity	7	0.000203475	0.00156572
purple	GO BP term	GO:0002820	negative regulation of adaptive immune response	4	0.000211341	0.00161259
purple	GO BP term	GO:1903307	positive regulation of regulated secretory pathway	4	0.000211341	0.00161259
purple	GO BP term	GO:0051056	regulation of small GTPase mediated signal transduction	9	0.000215434	0.00163694
purple	GO BP term	GO:1903038	negative regulation of leukocyte cell-cell adhesion	6	0.000216661	0.0016394
purple	GO BP term	GO:0045655	regulation of monocyte differentiation	3	0.000229073	0.00172613
purple	GO BP term	GO:0019884	antigen processing and presentation of exogenous antigen	8	0.000235223	0.00176514
purple	GO BP term	GO:0007249	I-kappaB kinase/NF-kappaB signaling	8	0.000246677	0.00184348
purple	GO BP term	GO:0098581	detection of external biotic stimulus	3	0.000264132	0.00196583
purple	GO BP term	GO:0002700	regulation of production of molecular mediator of immune response	6	0.000278034	0.00206086
purple	GO BP term	GO:0050715	positive regulation of cytokine secretion	6	0.000287814	0.00211607
purple	GO BP term	GO:1903305	regulation of regulated secretory pathway	6	0.000287814	0.00211607
purple	GO BP term	GO:0051047	positive regulation of secretion	10	0.000291737	0.00213627
purple	GO BP term	GO:0002690	positive regulation of leukocyte chemotaxis	5	0.000295615	0.00215597
purple	GO BP term	GO:0032928	regulation of superoxide anion generation	3	0.00030248	0.00218846
purple	GO BP term	GO:0090023	positive regulation of neutrophil chemotaxis	3	0.00030248	0.00218846
purple	GO BP term	GO:0070374	positive regulation of ERK1 and ERK2 cascade	8	0.000304031	0.00219095
purple	GO BP term	GO:0043547	positive regulation of GTPase activity	10	0.000307397	0.00220645
purple	GO BP term	GO:0046632	alpha-beta T cell differentiation	5	0.000309438	0.0022082
purple	GO BP term	GO:0070372	regulation of ERK1 and ERK2 cascade	9	0.000310072	0.0022082
purple	GO BP term	GO:0043900	regulation of multi-organism process	10	0.000323755	0.00229664
purple	GO BP term	GO:0002503	peptide antigen assembly with MHC class II protein complex	3	0.000344244	0.00242305
purple	GO BP term	GO:0032727	positive regulation of interferon-alpha production	3	0.000344244	0.00242305
purple	GO BP term	GO:0046330	positive regulation of JNK cascade	6	0.000364078	0.00255276
purple	GO BP term	GO:0032496	response to lipopolysaccharide	9	0.000376053	0.00262658
purple	GO BP term	GO:0045639	positive regulation of myeloid cell differentiation	5	0.000386047	0.00266951
purple	GO BP term	GO:0002501	peptide antigen assembly with MHC protein complex	3	0.000389549	0.00266951
purple	GO BP term	GO:0009595	detection of biotic stimulus	3	0.000389549	0.00266951
purple	GO BP term	GO:0035666	TRIF-dependent toll-like receptor signaling pathway	3	0.000389549	0.00266951
purple	GO BP term	GO:0071624	positive regulation of granulocyte chemotaxis	3	0.000389549	0.00266951
purple	GO BP term	GO:0072593	reactive oxygen species metabolic process	8	0.000397029	0.00271055
purple	GO BP term	GO:0030100	regulation of endocytosis	8	0.000414569	0.00281969
purple	GO BP term	GO:0002762	negative regulation of myeloid leukocyte differentiation	4	0.000422237	0.00286112
purple	GO BP term	GO:0008360	regulation of cell shape	6	0.000427614	0.0028842
purple	GO BP term	GO:0070371	ERK1 and ERK2 cascade	9	0.000428818	0.0028842
purple	GO BP term	GO:0097242	amyloid-beta clearance	3	0.000438517	0.00291702
purple	GO BP term	GO:1902624	positive regulation of neutrophil migration	3	0.000438517	0.00291702
purple	GO BP term	GO:2000482	regulation of interleukin-8 secretion	3	0.000438517	0.00291702
purple	GO BP term	GO:0002704	negative regulation of leukocyte mediated immunity	4	0.000449366	0.00297828
purple	GO BP term	GO:0050777	negative regulation of immune response	6	0.000455325	0.0030068
purple	GO BP term	GO:0002367	cytokine production involved in immune response	5	0.000457007	0.00300698
purple	GO BP term	GO:0051091	positive regulation of DNA-binding transcription factor activity	8	0.000461194	0.00302357
purple	GO BP term	GO:0046637	regulation of alpha-beta T cell differentiation	4	0.000477715	0.00312062
purple	GO BP term	GO:0150078	positive regulation of neuroinflammatory response	3	0.000491268	0.00319765
purple	GO BP term	GO:0032757	positive regulation of interleukin-8 production	4	0.000507317	0.00329031
purple	GO BP term	GO:0002756	MyD88-independent toll-like receptor signaling pathway	3	0.000547919	0.00352845
purple	GO BP term	GO:0090022	regulation of neutrophil chemotaxis	3	0.000547919	0.00352845
purple	GO BP term	GO:0033627	cell adhesion mediated by integrin	4	0.000603941	0.00387546
purple	GO BP term	GO:0032753	positive regulation of interleukin-4 production	3	0.000608586	0.00389152
purple	GO BP term	GO:1902106	negative regulation of leukocyte differentiation	5	0.000627943	0.00400121
purple	GO BP term	GO:0001911	negative regulation of leukocyte mediated cytotoxicity	3	0.00067338	0.00421675
purple	GO BP term	GO:0002399	MHC class II protein complex assembly	3	0.00067338	0.00421675
purple	GO BP term	GO:0002828	regulation of type 2 immune response	3	0.00067338	0.00421675
purple	GO BP term	GO:0043372	positive regulation of CD4-positive, alpha-beta T cell differentiation	3	0.00067338	0.00421675
purple	GO BP term	GO:0072606	interleukin-8 secretion	3	0.00067338	0.00421675
purple	GO BP term	GO:0001959	regulation of cytokine-mediated signaling pathway	6	0.000710544	0.00443419
purple	GO BP term	GO:1903532	positive regulation of secretion by cell	9	0.000728914	0.00452965
purple	GO BP term	GO:0048015	phosphatidylinositol-mediated signaling	6	0.00073083	0.00452965
purple	GO BP term	GO:0001782	B cell homeostasis	3	0.000742412	0.00453946
purple	GO BP term	GO:0002396	MHC protein complex assembly	3	0.000742412	0.00453946
purple	GO BP term	GO:0055094	response to lipoprotein particle	3	0.000742412	0.00453946
purple	GO BP term	GO:1902622	regulation of neutrophil migration	3	0.000742412	0.00453946
purple	GO BP term	GO:2000401	regulation of lymphocyte migration	4	0.00079293	0.00482479
purple	GO BP term	GO:0048017	inositol lipid-mediated signaling	6	0.000794389	0.00482479
purple	GO BP term	GO:0045730	respiratory burst	3	0.000815791	0.0049098
purple	GO BP term	GO:1903978	regulation of microglial cell activation	3	0.000815791	0.0049098
purple	GO BP term	GO:1901568	fatty acid derivative metabolic process	6	0.000816498	0.0049098
purple	GO BP term	GO:0033077	T cell differentiation in thymus	4	0.000835204	0.00498924
purple	GO BP term	GO:0042130	negative regulation of T cell proliferation	4	0.000835204	0.00498924
purple	GO BP term	GO:1901222	regulation of NIK/NF-kappaB signaling	5	0.000842852	0.00501842
purple	GO BP term	GO:0031342	negative regulation of cell killing	3	0.000893622	0.00525184
purple	GO BP term	GO:0032673	regulation of interleukin-4 production	3	0.000893622	0.00525184
purple	GO BP term	GO:0050901	leukocyte tethering or rolling	3	0.000893622	0.00525184
purple	GO BP term	GO:0071402	cellular response to lipoprotein particle stimulus	3	0.000893622	0.00525184
purple	GO BP term	GO:0032874	positive regulation of stress-activated MAPK cascade	6	0.000909724	0.00532922
purple	GO BP term	GO:0043367	CD4-positive, alpha-beta T cell differentiation	4	0.000924481	0.00539825
purple	GO BP term	GO:0070304	positive regulation of stress-activated protein kinase signaling cascade	6	0.000934262	0.0054313
purple	GO BP term	GO:0002688	regulation of leukocyte chemotaxis	5	0.000936122	0.0054313
purple	GO BP term	GO:0060759	regulation of response to cytokine stimulus	6	0.000959308	0.0055481
purple	GO BP term	GO:2000516	positive regulation of CD4-positive, alpha-beta T cell activation	3	0.000976009	0.00562677
purple	GO BP term	GO:0038093	Fc receptor signaling pathway	5	0.00103686	0.00595869
purple	GO BP term	GO:0001773	myeloid dendritic cell activation	3	0.00106305	0.00608992
purple	GO BP term	GO:0071902	positive regulation of protein serine/threonine kinase activity	8	0.00114378	0.00653176
purple	GO BP term	GO:0042036	negative regulation of cytokine biosynthetic process	3	0.00115485	0.0065538
purple	GO BP term	GO:0042092	type 2 immune response	3	0.00115485	0.0065538
purple	GO BP term	GO:0009615	response to virus	8	0.00120584	0.0068218
purple	GO BP term	GO:0032481	positive regulation of type I interferon production	4	0.00123242	0.00695056
purple	GO BP term	GO:0022408	negative regulation of cell-cell adhesion	6	0.0012703	0.00711998
purple	GO BP term	GO:0046328	regulation of JNK cascade	6	0.0012703	0.00711998
purple	GO BP term	GO:0045921	positive regulation of exocytosis	4	0.00141052	0.00788157
purple	GO BP term	GO:0016064	immunoglobulin mediated immune response	5	0.00143136	0.00788996
purple	GO BP term	GO:0001768	establishment of T cell polarity	2	0.00143375	0.00788996
purple	GO BP term	GO:0034154	toll-like receptor 7 signaling pathway	2	0.00143375	0.00788996
purple	GO BP term	GO:0051133	regulation of NK T cell activation	2	0.00143375	0.00788996
purple	GO BP term	GO:2001179	regulation of interleukin-10 secretion	2	0.00143375	0.00788996
purple	GO BP term	GO:0032633	interleukin-4 production	3	0.00145976	0.00798471
purple	GO BP term	GO:0032728	positive regulation of interferon-beta production	3	0.00145976	0.00798471
purple	GO BP term	GO:0045670	regulation of osteoclast differentiation	4	0.00147368	0.00802591
purple	GO BP term	GO:0019724	B cell mediated immunity	5	0.00147613	0.00802591
purple	GO BP term	GO:0017157	regulation of exocytosis	6	0.00150501	0.00815852
purple	GO BP term	GO:0034121	regulation of toll-like receptor signaling pathway	4	0.00153877	0.0083044
purple	GO BP term	GO:0002822	regulation of adaptive immune response based on somatic recombination of immune receptors built from immunoglobulin superfamily domains	6	0.00154107	0.0083044
purple	GO BP term	GO:0030225	macrophage differentiation	3	0.00157154	0.00844353
purple	GO BP term	GO:0043406	positive regulation of MAP kinase activity	7	0.0016084	0.00861609
purple	GO BP term	GO:0038061	NIK/NF-kappaB signaling	5	0.00161664	0.00863477
purple	GO BP term	GO:0045124	regulation of bone resorption	3	0.00168854	0.00899234
purple	GO BP term	GO:0001767	establishment of lymphocyte polarity	2	0.00174577	0.00911012
purple	GO BP term	GO:0001915	negative regulation of T cell mediated cytotoxicity	2	0.00174577	0.00911012
purple	GO BP term	GO:0032494	response to peptidoglycan	2	0.00174577	0.00911012
purple	GO BP term	GO:0045628	regulation of T-helper 2 cell differentiation	2	0.00174577	0.00911012
purple	GO BP term	GO:0060100	positive regulation of phagocytosis, engulfment	2	0.00174577	0.00911012
purple	GO BP term	GO:0072608	interleukin-10 secretion	2	0.00174577	0.00911012
purple	GO BP term	GO:1905155	positive regulation of membrane invagination	2	0.00174577	0.00911012
purple	GO BP term	GO:0002823	negative regulation of adaptive immune response based on somatic recombination of immune receptors built from immunoglobulin superfamily domains	3	0.00181085	0.00939572
purple	GO BP term	GO:0048246	macrophage chemotaxis	3	0.00181085	0.00939572
purple	GO BP term	GO:0090322	regulation of superoxide metabolic process	3	0.00193855	0.0100297
purple	GO BP term	GO:0050921	positive regulation of chemotaxis	5	0.00198249	0.0102278
purple	GO BP term	GO:0002281	macrophage activation involved in immune response	2	0.00208706	0.0105574
purple	GO BP term	GO:0002430	complement receptor mediated signaling pathway	2	0.00208706	0.0105574
purple	GO BP term	GO:0016045	detection of bacterium	2	0.00208706	0.0105574
purple	GO BP term	GO:0034135	regulation of toll-like receptor 2 signaling pathway	2	0.00208706	0.0105574
purple	GO BP term	GO:0045078	positive regulation of interferon-gamma biosynthetic process	2	0.00208706	0.0105574
purple	GO BP term	GO:0045351	type I interferon biosynthetic process	2	0.00208706	0.0105574
purple	GO BP term	GO:0051132	NK T cell activation	2	0.00208706	0.0105574
purple	GO BP term	GO:0042088	T-helper 1 type immune response	3	0.00221047	0.0111197
purple	GO BP term	GO:0061756	leukocyte adhesion to vascular endothelial cell	3	0.00221047	0.0111197
purple	GO BP term	GO:0033628	regulation of cell adhesion mediated by integrin	3	0.00235485	0.0118133
purple	GO BP term	GO:0006959	humoral immune response	7	0.00237026	0.0118578
purple	GO BP term	GO:0034103	regulation of tissue remodeling	4	0.00239212	0.0119343
purple	GO BP term	GO:0032725	positive regulation of granulocyte macrophage colony-stimulating factor production	2	0.00245726	0.012126
purple	GO BP term	GO:0060099	regulation of phagocytosis, engulfment	2	0.00245726	0.012126
purple	GO BP term	GO:0070673	response to interleukin-18	2	0.00245726	0.012126
purple	GO BP term	GO:0098543	detection of other organism	2	0.00245726	0.012126
purple	GO BP term	GO:2000106	regulation of leukocyte apoptotic process	4	0.00248298	0.0122197
purple	GO BP term	GO:0043370	regulation of CD4-positive, alpha-beta T cell differentiation	3	0.00250494	0.0122945
purple	GO BP term	GO:0007162	negative regulation of cell adhesion	7	0.00258708	0.0126634
purple	GO BP term	GO:0019722	calcium-mediated signaling	6	0.00262106	0.0127953
purple	GO BP term	GO:0002449	lymphocyte mediated immunity	8	0.00265818	0.0129417
purple	GO BP term	GO:0002821	positive regulation of adaptive immune response	5	0.00267481	0.0129584
purple	GO BP term	GO:0007254	JNK cascade	6	0.00267587	0.0129584
purple	GO BP term	GO:0046850	regulation of bone remodeling	3	0.00282256	0.0136323
purple	GO BP term	GO:0001820	serotonin secretion	2	0.00285604	0.0136489
purple	GO BP term	GO:0035589	G protein-coupled purinergic nucleotide receptor signaling pathway	2	0.00285604	0.0136489
purple	GO BP term	GO:0045064	T-helper 2 cell differentiation	2	0.00285604	0.0136489
purple	GO BP term	GO:1905153	regulation of membrane invagination	2	0.00285604	0.0136489
purple	GO BP term	GO:0043122	regulation of I-kappaB kinase/NF-kappaB signaling	6	0.00296299	0.0141228
purple	GO BP term	GO:0035710	CD4-positive, alpha-beta T cell activation	4	0.00297305	0.0141337
purple	GO BP term	GO:0002707	negative regulation of lymphocyte mediated immunity	3	0.00299023	0.0141413
purple	GO BP term	GO:0032715	negative regulation of interleukin-6 production	3	0.00299023	0.0141413
purple	GO BP term	GO:0031348	negative regulation of defense response	6	0.00302307	0.0142595
purple	GO BP term	GO:0032088	negative regulation of NF-kappaB transcription factor activity	4	0.00307843	0.014483
purple	GO BP term	GO:0006633	fatty acid biosynthetic process	5	0.00319775	0.0150055
purple	GO BP term	GO:0010759	positive regulation of macrophage chemotaxis	2	0.00328307	0.0152873
purple	GO BP term	GO:0071361	cellular response to ethanol	2	0.00328307	0.0152873
purple	GO BP term	GO:1903980	positive regulation of microglial cell activation	2	0.00328307	0.0152873
purple	GO BP term	GO:0045638	negative regulation of myeloid cell differentiation	4	0.00329679	0.015312
purple	GO BP term	GO:0032480	negative regulation of type I interferon production	3	0.00334367	0.0154506
purple	GO BP term	GO:0032735	positive regulation of interleukin-12 production	3	0.00334367	0.0154506
purple	GO BP term	GO:1903707	negative regulation of hemopoiesis	5	0.00335981	0.0154858
purple	GO BP term	GO:0034122	negative regulation of toll-like receptor signaling pathway	3	0.00352956	0.0161861
purple	GO BP term	GO:1905517	macrophage migration	3	0.00352956	0.0161861
purple	GO BP term	GO:0043902	positive regulation of multi-organism process	5	0.00379072	0.0173399
purple	GO BP term	GO:0032872	regulation of stress-activated MAPK cascade	6	0.00381732	0.0174177
purple	GO BP term	GO:0050850	positive regulation of calcium-mediated signaling	3	0.00392002	0.0177969
purple	GO BP term	GO:1900015	regulation of cytokine production involved in inflammatory response	3	0.00392002	0.0177969
purple	GO BP term	GO:0070302	regulation of stress-activated protein kinase signaling cascade	6	0.00396344	0.0179492
purple	GO BP term	GO:0034134	toll-like receptor 2 signaling pathway	2	0.00422053	0.0190185
purple	GO BP term	GO:2000484	positive regulation of interleukin-8 secretion	2	0.00422053	0.0190185
purple	GO BP term	GO:0050848	regulation of calcium-mediated signaling	4	0.0042758	0.0192199
purple	GO BP term	GO:0071675	regulation of mononuclear cell migration	3	0.00433579	0.0194415
purple	GO BP term	GO:0032147	activation of protein kinase activity	7	0.00449338	0.0200985
purple	GO BP term	GO:0002534	cytokine production involved in inflammatory response	3	0.00455331	0.0202667
purple	GO BP term	GO:0042093	T-helper cell differentiation	3	0.00455331	0.0202667
purple	GO BP term	GO:0002377	immunoglobulin production	4	0.00468848	0.0206993
purple	GO BP term	GO:2000379	positive regulation of reactive oxygen species metabolic process	4	0.00468848	0.0206993
purple	GO BP term	GO:0007250	activation of NF-kappaB-inducing kinase activity	2	0.0047303	0.0206993
purple	GO BP term	GO:0010744	positive regulation of macrophage derived foam cell differentiation	2	0.0047303	0.0206993
purple	GO BP term	GO:0032688	negative regulation of interferon-beta production	2	0.0047303	0.0206993
purple	GO BP term	GO:0032930	positive regulation of superoxide anion generation	2	0.0047303	0.0206993
purple	GO BP term	GO:1905523	positive regulation of macrophage migration	2	0.0047303	0.0206993
purple	GO BP term	GO:0045429	positive regulation of nitric oxide biosynthetic process	3	0.00477733	0.0207551
purple	GO BP term	GO:1904407	positive regulation of nitric oxide metabolic process	3	0.00477733	0.0207551
purple	GO BP term	GO:2000107	negative regulation of leukocyte apoptotic process	3	0.00477733	0.0207551
purple	GO BP term	GO:0033559	unsaturated fatty acid metabolic process	4	0.00497801	0.0214997
purple	GO BP term	GO:0071887	leukocyte apoptotic process	4	0.00497801	0.0214997
purple	GO BP term	GO:0002294	CD4-positive, alpha-beta T cell differentiation involved in immune response	3	0.00500792	0.0214997
purple	GO BP term	GO:0002381	immunoglobulin production involved in immunoglobulin mediated immune response	3	0.00500792	0.0214997
purple	GO BP term	GO:0019369	arachidonic acid metabolic process	3	0.00500792	0.0214997
purple	GO BP term	GO:0051222	positive regulation of protein transport	8	0.00508882	0.0217955
purple	GO BP term	GO:0001676	long-chain fatty acid metabolic process	4	0.00512717	0.0219081
purple	GO BP term	GO:0002287	alpha-beta T cell activation involved in immune response	3	0.00524511	0.0221923
purple	GO BP term	GO:0002293	alpha-beta T cell differentiation involved in immune response	3	0.00524511	0.0221923
purple	GO BP term	GO:0045453	bone resorption	3	0.00524511	0.0221923
purple	GO BP term	GO:0006837	serotonin transport	2	0.00526701	0.0221923
purple	GO BP term	GO:0007252	I-kappaB phosphorylation	2	0.00526701	0.0221923
purple	GO BP term	GO:0032695	negative regulation of interleukin-12 production	2	0.00526701	0.0221923
purple	GO BP term	GO:0001961	positive regulation of cytokine-mediated signaling pathway	3	0.00573952	0.0240715
purple	GO BP term	GO:0070228	regulation of lymphocyte apoptotic process	3	0.00573952	0.0240715
purple	GO BP term	GO:0006907	pinocytosis	2	0.00583032	0.0242285
purple	GO BP term	GO:0042033	chemokine biosynthetic process	2	0.00583032	0.0242285
purple	GO BP term	GO:0050755	chemokine metabolic process	2	0.00583032	0.0242285
purple	GO BP term	GO:0090197	positive regulation of chemokine secretion	2	0.00583032	0.0242285
purple	GO BP term	GO:0043123	positive regulation of I-kappaB kinase/NF-kappaB signaling	5	0.0059153	0.0245255
purple	GO BP term	GO:0048872	homeostasis of number of cells	6	0.0060573	0.0250571
purple	GO BP term	GO:0043405	regulation of MAP kinase activity	7	0.00619839	0.0255825
purple	GO BP term	GO:0038095	Fc-epsilon receptor signaling pathway	3	0.00626097	0.0257821
purple	GO BP term	GO:0002260	lymphocyte homeostasis	3	0.00680982	0.0279157
purple	GO BP term	GO:0002292	T cell differentiation involved in immune response	3	0.00680982	0.0279157
purple	GO BP term	GO:0050714	positive regulation of protein secretion	6	0.00690752	0.0282041
purple	GO BP term	GO:0002710	negative regulation of T cell mediated immunity	2	0.00703551	0.0282041
purple	GO BP term	GO:0002902	regulation of B cell apoptotic process	2	0.00703551	0.0282041
purple	GO BP term	GO:0019370	leukotriene biosynthetic process	2	0.00703551	0.0282041
purple	GO BP term	GO:0033630	positive regulation of cell adhesion mediated by integrin	2	0.00703551	0.0282041
purple	GO BP term	GO:0035590	purinergic nucleotide receptor signaling pathway	2	0.00703551	0.0282041
purple	GO BP term	GO:0042053	regulation of dopamine metabolic process	2	0.00703551	0.0282041
purple	GO BP term	GO:0042069	regulation of catecholamine metabolic process	2	0.00703551	0.0282041
purple	GO BP term	GO:0045624	positive regulation of T-helper cell differentiation	2	0.00703551	0.0282041
purple	GO BP term	GO:0090196	regulation of chemokine secretion	2	0.00703551	0.0282041
purple	GO BP term	GO:2000377	regulation of reactive oxygen species metabolic process	5	0.00710178	0.0284071
purple	GO BP term	GO:1903409	reactive oxygen species biosynthetic process	4	0.00753884	0.0300891
purple	GO BP term	GO:0042832	defense response to protozoan	2	0.00767675	0.0304725
purple	GO BP term	GO:0071404	cellular response to low-density lipoprotein particle stimulus	2	0.00767675	0.0304725
purple	GO BP term	GO:0060760	positive regulation of response to cytokine stimulus	3	0.00768524	0.0304725
purple	GO BP term	GO:1904951	positive regulation of establishment of protein localization	8	0.00789324	0.031229
purple	GO BP term	GO:0030101	natural killer cell activation	4	0.00793488	0.0313255
purple	GO BP term	GO:1903428	positive regulation of reactive oxygen species biosynthetic process	3	0.00799111	0.0314791
purple	GO BP term	GO:2000514	regulation of CD4-positive, alpha-beta T cell activation	3	0.00830408	0.0325839
purple	GO BP term	GO:0001562	response to protozoan	2	0.00834334	0.0325839
purple	GO BP term	GO:0034162	toll-like receptor 9 signaling pathway	2	0.00834334	0.0325839
purple	GO BP term	GO:0035588	G protein-coupled purinergic receptor signaling pathway	2	0.00834334	0.0325839
purple	GO BP term	GO:0043647	inositol phosphate metabolic process	3	0.00862417	0.0336084
purple	GO BP term	GO:0045953	negative regulation of natural killer cell mediated cytotoxicity	2	0.00903497	0.034984
purple	GO BP term	GO:0090195	chemokine secretion	2	0.00903497	0.034984
purple	GO BP term	GO:2001185	regulation of CD8-positive, alpha-beta T cell activation	2	0.00903497	0.034984
purple	GO BP term	GO:0002698	negative regulation of immune effector process	4	0.00920438	0.0355642
purple	GO BP term	GO:0051403	stress-activated MAPK cascade	6	0.00926961	0.0357402
purple	GO BP term	GO:0002793	positive regulation of peptide secretion	6	0.00940809	0.0361972
purple	GO BP term	GO:0031663	lipopolysaccharide-mediated signaling pathway	3	0.00962757	0.0369634
purple	GO BP term	GO:0002716	negative regulation of natural killer cell mediated immunity	2	0.00975134	0.0372809
purple	GO BP term	GO:0034138	toll-like receptor 3 signaling pathway	2	0.00975134	0.0372809
purple	GO BP term	GO:0002433	immune response-regulating cell surface receptor signaling pathway involved in phagocytosis	3	0.0103327	0.0393381
purple	GO BP term	GO:0038096	Fc-gamma receptor signaling pathway involved in phagocytosis	3	0.0103327	0.0393381
purple	GO BP term	GO:0001783	B cell apoptotic process	2	0.0104921	0.0397782
purple	GO BP term	GO:0032660	regulation of interleukin-17 production	2	0.0104921	0.0397782
purple	GO BP term	GO:0034113	heterotypic cell-cell adhesion	3	0.0106963	0.0402163
purple	GO BP term	GO:0045428	regulation of nitric oxide biosynthetic process	3	0.0106963	0.0402163
purple	GO BP term	GO:0070227	lymphocyte apoptotic process	3	0.0106963	0.0402163
purple	GO BP term	GO:0071242	cellular response to ammonium ion	3	0.0106963	0.0402163
purple	GO BP term	GO:0061515	myeloid cell development	3	0.0110672	0.0415248
purple	GO BP term	GO:0010758	regulation of macrophage chemotaxis	2	0.0112571	0.0418055
purple	GO BP term	GO:0031579	membrane raft organization	2	0.0112571	0.0418055
purple	GO BP term	GO:0036336	dendritic cell migration	2	0.0112571	0.0418055
purple	GO BP term	GO:0043304	regulation of mast cell degranulation	2	0.0112571	0.0418055
purple	GO BP term	GO:1900016	negative regulation of cytokine production involved in inflammatory response	2	0.0112571	0.0418055
purple	GO BP term	GO:0038094	Fc-gamma receptor signaling pathway	3	0.0114455	0.0424182
purple	GO BP term	GO:0051668	localization within membrane	4	0.0116018	0.0429101
purple	GO BP term	GO:0002230	positive regulation of defense response to virus by host	2	0.0120459	0.0441925
purple	GO BP term	GO:0002825	regulation of T-helper 1 type immune response	2	0.0120459	0.0441925
purple	GO BP term	GO:0032703	negative regulation of interleukin-2 production	2	0.0120459	0.0441925
purple	GO BP term	GO:0033006	regulation of mast cell activation involved in immune response	2	0.0120459	0.0441925
purple	GO BP term	GO:0002431	Fc receptor mediated stimulatory signaling pathway	3	0.0122242	0.0446662
purple	GO BP term	GO:0009988	cell-cell recognition	3	0.0122242	0.0446662
purple	GO BP term	GO:0014065	phosphatidylinositol 3-kinase signaling	4	0.0126631	0.0461769
purple	GO BP term	GO:0034123	positive regulation of toll-like receptor signaling pathway	2	0.0128582	0.0466532
purple	GO BP term	GO:1903010	regulation of bone development	2	0.0128582	0.0466532
purple	GO BP term	GO:0050920	regulation of chemotaxis	5	0.0128707	0.0466532
purple	GO BP term	GO:0046718	viral entry into host cell	4	0.0134985	0.0488311
purple	GO BP term	GO:0010743	regulation of macrophage derived foam cell differentiation	2	0.0136938	0.049341
purple	GO BP term	GO:0032620	interleukin-17 production	2	0.0136938	0.049341
purple	GO BP term	GO:0002824	positive regulation of adaptive immune response based on somatic recombination of immune receptors built from immunoglobulin superfamily domains	4	0.0137845	0.0495698
purple	KEGG pathway	hsa05150	Staphylococcus aureus infection	52	1.95412e-68	2.42311e-66
purple	KEGG pathway	hsa05310	Asthma	44	1.75327e-65	1.08702e-63
purple	KEGG pathway	hsa05330	Allograft rejection	46	1.31227e-63	5.42407e-62
purple	KEGG pathway	hsa04640	Hematopoietic cell lineage	53	1.12562e-61	3.48944e-60
purple	KEGG pathway	hsa05416	Viral myocarditis	49	1.65716e-61	4.10977e-60
purple	KEGG pathway	hsa04672	Intestinal immune network for IgA production	46	2.35079e-61	4.8583e-60
purple	KEGG pathway	hsa04940	Type I diabetes mellitus	46	1.16486e-60	1.80553e-59
purple	KEGG pathway	hsa05332	Graft-versus-host disease	46	1.16486e-60	1.80553e-59
purple	KEGG pathway	hsa05140	Leishmaniasis	49	1.74223e-59	2.40041e-58
purple	KEGG pathway	hsa05320	Autoimmune thyroid disease	46	2.422e-59	3.00328e-58
purple	KEGG pathway	hsa05152	Tuberculosis	60	2.08623e-58	2.35175e-57
purple	KEGG pathway	hsa05323	Rheumatoid arthritis	50	8.51454e-57	8.79835e-56
purple	KEGG pathway	hsa04612	Antigen processing and presentation	50	1.18542e-56	1.13071e-55
purple	KEGG pathway	hsa04514	Cell adhesion molecules (CAMs)	56	2.59016e-56	2.29414e-55
purple	KEGG pathway	hsa05145	Toxoplasmosis	53	4.7501e-56	3.92675e-55
purple	KEGG pathway	hsa05321	Inflammatory bowel disease (IBD)	45	2.5098e-55	1.9451e-54
purple	KEGG pathway	hsa04145	Phagosome	55	7.23023e-54	5.27381e-53
purple	KEGG pathway	hsa04658	Th1 and Th2 cell differentiation	46	1.61903e-50	1.11533e-49
purple	KEGG pathway	hsa05322	Systemic lupus erythematosus	46	5.41753e-50	3.53565e-49
purple	KEGG pathway	hsa05164	Influenza A	52	2.97552e-49	1.84482e-48
purple	KEGG pathway	hsa04659	Th17 cell differentiation	46	1.10668e-46	6.53468e-46
purple	KEGG pathway	hsa05169	Epstein-Barr virus infection	51	7.15261e-43	4.03147e-42
purple	KEGG pathway	hsa05166	Human T-cell leukemia virus 1 infection	51	9.61058e-40	5.18136e-39
purple	KEGG pathway	hsa04611	Platelet activation	15	7.96255e-09	4.11398e-08
purple	KEGG pathway	hsa05340	Primary immunodeficiency	9	3.59951e-08	1.78536e-07
purple	KEGG pathway	hsa04380	Osteoclast differentiation	13	3.44988e-07	1.64533e-06
purple	KEGG pathway	hsa04662	B cell receptor signaling pathway	10	9.08615e-07	4.1729e-06
purple	KEGG pathway	hsa04072	Phospholipase D signaling pathway	12	3.11823e-05	0.000138093
purple	KEGG pathway	hsa04620	Toll-like receptor signaling pathway	9	9.60295e-05	0.000410609
purple	KEGG pathway	hsa04064	NF-kappa B signaling pathway	8	0.000397608	0.00159043
purple	KEGG pathway	hsa04666	Fc gamma R-mediated phagocytosis	8	0.000397608	0.00159043
purple	KEGG pathway	hsa04015	Rap1 signaling pathway	11	0.00151416	0.00586736
purple	KEGG pathway	hsa04664	Fc epsilon RI signaling pathway	6	0.00189771	0.00713077
purple	KEGG pathway	hsa04810	Regulation of actin cytoskeleton	11	0.00300803	0.0106912
purple	KEGG pathway	hsa05167	Kaposi sarcoma-associated herpesvirus infection	10	0.00301767	0.0106912
purple	KEGG pathway	hsa04062	Chemokine signaling pathway	10	0.00325243	0.0112028
purple	KEGG pathway	hsa00590	Arachidonic acid metabolism	5	0.00357396	0.0119776
purple	KEGG pathway	hsa04670	Leukocyte transendothelial migration	7	0.00576848	0.0188235
purple	KEGG pathway	hsa00565	Ether lipid metabolism	4	0.00662009	0.0210485
purple	KEGG pathway	hsa04725	Cholinergic synapse	7	0.00713503	0.0221186
purple	KEGG pathway	hsa04610	Complement and coagulation cascades	5	0.0112987	0.0341716
purple	KEGG pathway	hsa04625	C-type lectin receptor signaling pathway	6	0.0119488	0.0352774
purple	KEGG pathway	hsa04660	T cell receptor signaling pathway	6	0.0134499	0.0387859
purple	KEGG pathway	hsa05144	Malaria	4	0.0143038	0.0403107
red	GO BP term	GO:0042552	myelination	19	1.82608e-16	2.44529e-13
red	GO BP term	GO:0007272	ensheathment of neurons	19	2.52092e-16	2.44529e-13
red	GO BP term	GO:0008366	axon ensheathment	19	2.52092e-16	2.44529e-13
red	GO BP term	GO:0022010	central nervous system myelination	8	2.19172e-11	1.27558e-08
red	GO BP term	GO:0032291	axon ensheathment in central nervous system	8	2.19172e-11	1.27558e-08
red	GO BP term	GO:0014003	oligodendrocyte development	10	3.39954e-11	1.64878e-08
red	GO BP term	GO:0048709	oligodendrocyte differentiation	13	4.35734e-11	1.81141e-08
red	GO BP term	GO:0010001	glial cell differentiation	18	9.01595e-11	3.27955e-08
red	GO BP term	GO:0042063	gliogenesis	21	1.11615e-10	3.60889e-08
red	GO BP term	GO:0021782	glial cell development	13	1.24034e-09	3.60938e-07
red	GO BP term	GO:0014013	regulation of gliogenesis	11	5.85271e-07	0.000154831
red	GO BP term	GO:0051961	negative regulation of nervous system development	16	1.18595e-06	0.000287593
red	GO BP term	GO:0050771	negative regulation of axonogenesis	8	2.25662e-06	0.000505135
red	GO BP term	GO:0050768	negative regulation of neurogenesis	15	2.662e-06	0.000553317
red	GO BP term	GO:0031641	regulation of myelination	6	4.2442e-06	0.000823375
red	GO BP term	GO:0014015	positive regulation of gliogenesis	8	7.81267e-06	0.00142093
red	GO BP term	GO:0007009	plasma membrane organization	8	1.63455e-05	0.00268466
red	GO BP term	GO:0045665	negative regulation of neuron differentiation	12	1.66062e-05	0.00268466
red	GO BP term	GO:0045685	regulation of glial cell differentiation	7	1.81334e-05	0.00277727
red	GO BP term	GO:0010721	negative regulation of cell development	15	2.01948e-05	0.00293834
red	GO BP term	GO:0010771	negative regulation of cell morphogenesis involved in differentiation	8	2.94987e-05	0.00408767
red	GO BP term	GO:0007422	peripheral nervous system development	7	3.39281e-05	0.00448777
red	GO BP term	GO:0007033	vacuole organization	10	3.60427e-05	0.00456018
red	GO BP term	GO:0007409	axonogenesis	17	4.433e-05	0.00537501
red	GO BP term	GO:0006970	response to osmotic stress	7	5.51841e-05	0.00642343
red	GO BP term	GO:0032535	regulation of cellular component size	15	6.6904e-05	0.00745401
red	GO BP term	GO:0030148	sphingolipid biosynthetic process	8	6.91609e-05	0.00745401
red	GO BP term	GO:0008361	regulation of cell size	10	7.66495e-05	0.00796608
red	GO BP term	GO:0048017	inositol lipid-mediated signaling	10	8.37527e-05	0.00812401
red	GO BP term	GO:0050770	regulation of axonogenesis	10	8.37527e-05	0.00812401
red	GO BP term	GO:0014065	phosphatidylinositol 3-kinase signaling	9	9.82638e-05	0.00922412
red	GO BP term	GO:0030517	negative regulation of axon extension	5	0.00016076	0.0144947
red	GO BP term	GO:0051647	nucleus localization	4	0.000164373	0.0144947
red	GO BP term	GO:0045687	positive regulation of glial cell differentiation	5	0.000179137	0.015332
red	GO BP term	GO:0050769	positive regulation of neurogenesis	16	0.000239646	0.0197215
red	GO BP term	GO:0021762	substantia nigra development	5	0.000243977	0.0197215
red	GO BP term	GO:0010927	cellular component assembly involved in morphogenesis	7	0.000273134	0.0214816
red	GO BP term	GO:0006665	sphingolipid metabolic process	9	0.000300521	0.0222075
red	GO BP term	GO:0048843	negative regulation of axon extension involved in axon guidance	4	0.000305258	0.0222075
red	GO BP term	GO:0090022	regulation of neutrophil chemotaxis	4	0.000305258	0.0222075
red	GO BP term	GO:0010769	regulation of cell morphogenesis involved in differentiation	12	0.000322342	0.0223268
red	GO BP term	GO:0007411	axon guidance	11	0.000337363	0.0223268
red	GO BP term	GO:0061351	neural precursor cell proliferation	8	0.000339413	0.0223268
red	GO BP term	GO:0048640	negative regulation of developmental growth	7	0.000341938	0.0223268
red	GO BP term	GO:0097485	neuron projection guidance	11	0.000348225	0.0223268
red	GO BP term	GO:0031345	negative regulation of cell projection organization	9	0.000352933	0.0223268
red	GO BP term	GO:0048015	phosphatidylinositol-mediated signaling	9	0.000367152	0.0227322
red	GO BP term	GO:1902668	negative regulation of axon guidance	4	0.00040112	0.0243179
red	GO BP term	GO:0031643	positive regulation of myelination	3	0.000420333	0.0249626
red	GO BP term	GO:1902622	regulation of neutrophil migration	4	0.000456326	0.0264574
red	GO BP term	GO:0001755	neural crest cell migration	5	0.000463686	0.0264574
red	GO BP term	GO:0010977	negative regulation of neuron projection development	8	0.000506342	0.0283357
red	GO BP term	GO:0048708	astrocyte differentiation	6	0.000531578	0.0289478
red	GO BP term	GO:0031099	regeneration	9	0.000537176	0.0289478
red	GO BP term	GO:0000281	mitotic cytokinesis	6	0.000565425	0.0299161
red	GO BP term	GO:0046467	membrane lipid biosynthetic process	8	0.000599287	0.0311415
red	GO BP term	GO:0048841	regulation of axon extension involved in axon guidance	4	0.000654271	0.0329726
red	GO BP term	GO:0043217	myelin maintenance	3	0.000657185	0.0329726
red	GO BP term	GO:0014066	regulation of phosphatidylinositol 3-kinase signaling	7	0.000699021	0.0344772
red	GO BP term	GO:0019751	polyol metabolic process	7	0.000732866	0.035544
red	GO BP term	GO:0008360	regulation of cell shape	8	0.00085922	0.040989
red	GO BP term	GO:0007163	establishment or maintenance of cell polarity	9	0.0009089	0.0426597
red	GO BP term	GO:0031106	septin ring organization	3	0.000965256	0.0432138
red	GO BP term	GO:0072574	hepatocyte proliferation	3	0.000965256	0.0432138
red	GO BP term	GO:0072575	epithelial cell proliferation involved in liver morphogenesis	3	0.000965256	0.0432138
red	GO BP term	GO:0042246	tissue regeneration	5	0.00100112	0.0441402
red	GO BP term	GO:0014037	Schwann cell differentiation	4	0.00110832	0.0464105
red	GO BP term	GO:0048846	axon extension involved in axon guidance	4	0.00110832	0.0464105
red	GO BP term	GO:1902284	neuron projection extension involved in neuron projection guidance	4	0.00110832	0.0464105
red	GO BP term	GO:0032185	septin cytoskeleton organization	3	0.0011483	0.0464105
red	GO BP term	GO:0034312	diol biosynthetic process	3	0.0011483	0.0464105
red	GO BP term	GO:0072576	liver morphogenesis	3	0.0011483	0.0464105
red	GO BP term	GO:0061640	cytoskeleton-dependent cytokinesis	6	0.00117635	0.0468929
red	GO BP term	GO:0071526	semaphorin-plexin signaling pathway	4	0.00122022	0.0476451
red	GO BP term	GO:0048857	neural nucleus development	5	0.00122797	0.0476451
red	GO BP term	GO:0007266	Rho protein signal transduction	9	0.00125668	0.0481176
red	KEGG pathway	hsa00565	Ether lipid metabolism	7	3.08365e-05	0.00476867
red	KEGG pathway	hsa04216	Ferroptosis	7	6.99698e-05	0.00476867
red	KEGG pathway	hsa04070	Phosphatidylinositol signaling system	10	7.463e-05	0.00476867
red	KEGG pathway	hsa00600	Sphingolipid metabolism	7	0.000110413	0.00476867
red	KEGG pathway	hsa04978	Mineral absorption	7	0.000120421	0.00476867
red	KEGG pathway	hsa04979	Cholesterol metabolism	7	0.000168097	0.00554721
red	KEGG pathway	hsa05222	Small cell lung cancer	9	0.000324488	0.00917837
red	KEGG pathway	hsa05165	Human papillomavirus infection	18	0.000371574	0.00919647
red	KEGG pathway	hsa04512	ECM-receptor interaction	8	0.000596145	0.0131152
red	KEGG pathway	hsa00562	Inositol phosphate metabolism	7	0.00128437	0.0254306
red	KEGG pathway	hsa04514	Cell adhesion molecules (CAMs)	11	0.00181887	0.0327397
red	KEGG pathway	hsa05100	Bacterial invasion of epithelial cells	7	0.00245387	0.0384022
red	KEGG pathway	hsa04360	Axon guidance	11	0.00252136	0.0384022
red	KEGG pathway	hsa04510	Focal adhesion	12	0.00339695	0.0480425
salmon	KEGG pathway	hsa04657	IL-17 signaling pathway	4	3.28639e-05	0.00174179
salmon	KEGG pathway	hsa04071	Sphingolipid signaling pathway	4	0.000152846	0.00405043
salmon	KEGG pathway	hsa04217	Necroptosis	4	0.000340258	0.00601122
salmon	KEGG pathway	hsa04621	NOD-like receptor signaling pathway	4	0.000464262	0.00608771
salmon	KEGG pathway	hsa04141	Protein processing in endoplasmic reticulum	4	0.000574312	0.00608771
tan	GO BP term	GO:0098742	cell-cell adhesion via plasma-membrane adhesion molecules	10	5.62368e-09	8.00812e-06
tan	GO BP term	GO:0007156	homophilic cell adhesion via plasma membrane adhesion molecules	8	2.79229e-08	1.98811e-05
tan	GO BP term	GO:0001764	neuron migration	6	4.59704e-06	0.00218206
tan	GO BP term	GO:0022029	telencephalon cell migration	4	3.86735e-05	0.0130928
tan	GO BP term	GO:0021885	forebrain cell migration	4	4.59719e-05	0.0130928
tan	GO BP term	GO:0048565	digestive tract development	5	6.16455e-05	0.0146305
tan	GO BP term	GO:0055123	digestive system development	5	9.45552e-05	0.0192352
tan	GO BP term	GO:0021537	telencephalon development	6	0.000129284	0.0230126
tan	GO BP term	GO:0098656	anion transmembrane transport	6	0.000169029	0.0243173
tan	GO BP term	GO:0060191	regulation of lipase activity	4	0.000170767	0.0243173
tan	GO BP term	GO:0016101	diterpenoid metabolic process	4	0.000266134	0.0344522
tan	GO BP term	GO:0032328	alanine transport	2	0.00034873	0.0381993
tan	GO BP term	GO:0043084	penile erection	2	0.00034873	0.0381993
tan	GO BP term	GO:0006721	terpenoid metabolic process	4	0.000473558	0.0450989
tan	GO BP term	GO:0010721	negative regulation of cell development	6	0.000475058	0.0450989
tan	GO BP term	GO:0032429	regulation of phospholipase A2 activity	2	0.000509613	0.0453555
tan	GO BP term	GO:0007494	midgut development	2	0.000601175	0.0475596
tan	GO BP term	GO:0046033	AMP metabolic process	2	0.000601175	0.0475596
tan	KEGG pathway	hsa04926	Relaxin signaling pathway	8	8.88655e-07	5.89522e-05
tan	KEGG pathway	hsa04012	ErbB signaling pathway	7	9.28381e-07	5.89522e-05
tan	KEGG pathway	hsa04010	MAPK signaling pathway	10	5.26329e-06	0.000222812
tan	KEGG pathway	hsa05219	Bladder cancer	5	9.17527e-06	0.000291315
tan	KEGG pathway	hsa05032	Morphine addiction	6	1.23376e-05	0.000311087
tan	KEGG pathway	hsa04392	Hippo signaling pathway - multiple species	4	1.4697e-05	0.000311087
tan	KEGG pathway	hsa05120	Epithelial cell signaling in Helicobacter pylori infection	5	5.51023e-05	0.000924861
tan	KEGG pathway	hsa05033	Nicotine addiction	4	5.8259e-05	0.000924861
tan	KEGG pathway	hsa05230	Central carbon metabolism in cancer	5	6.56759e-05	0.00092676
tan	KEGG pathway	hsa01521	EGFR tyrosine kinase inhibitor resistance	5	9.89988e-05	0.00125729
tan	KEGG pathway	hsa05212	Pancreatic cancer	5	0.00011547	0.00133315
tan	KEGG pathway	hsa04723	Retrograde endocannabinoid signaling	6	0.000189184	0.00191743
tan	KEGG pathway	hsa05144	Malaria	4	0.000196272	0.00191743
tan	KEGG pathway	hsa05210	Colorectal cancer	5	0.000224311	0.00203482
tan	KEGG pathway	hsa05231	Choline metabolism in cancer	5	0.00025481	0.00215739
tan	KEGG pathway	hsa04912	GnRH signaling pathway	5	0.000279684	0.00221999
tan	KEGG pathway	hsa04014	Ras signaling pathway	7	0.000305178	0.00227986
tan	KEGG pathway	hsa01522	Endocrine resistance	5	0.000355077	0.00250526
tan	KEGG pathway	hsa04928	Parathyroid hormone synthesis, secretion and action	5	0.000469911	0.00302138
tan	KEGG pathway	hsa04144	Endocytosis	7	0.000475808	0.00302138
tan	KEGG pathway	hsa04015	Rap1 signaling pathway	6	0.00107271	0.00621829
tan	KEGG pathway	hsa04068	FoxO signaling pathway	5	0.00107718	0.00621829
[truncated: 1,427 more rows]
